# Supplementary material for: Differential Gene Expression with an Emphasis on Floral Organ Size Differences in Natural and Synthetic Polyploids of Nicotiana tabacum (Solanaceae)
Source: MDPI journal article supplement (doi:10.3390/genes11091097), 2020-09-19

Subcluster 1; 20,114 transcripts

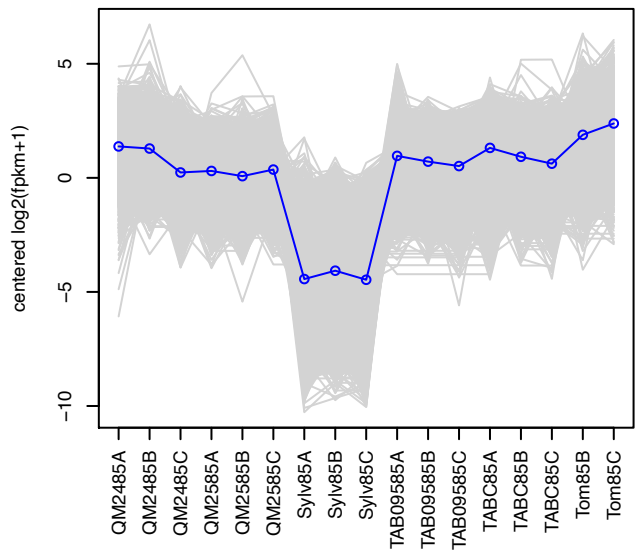

Subcluster 2; 6,201 transcripts

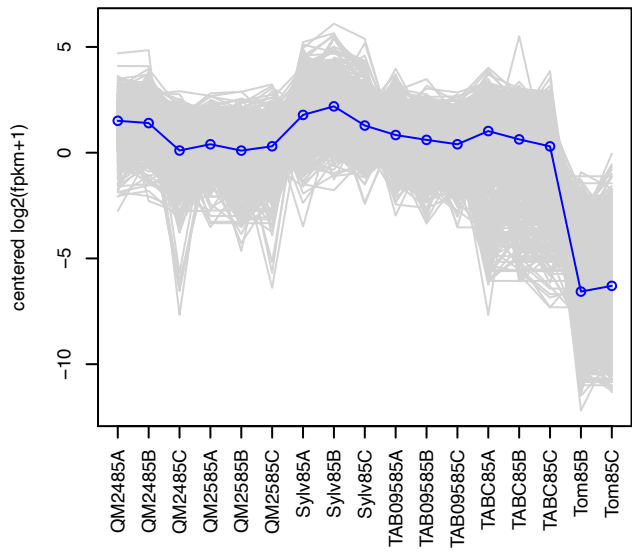

Subcluster 3; 15,253 transcripts

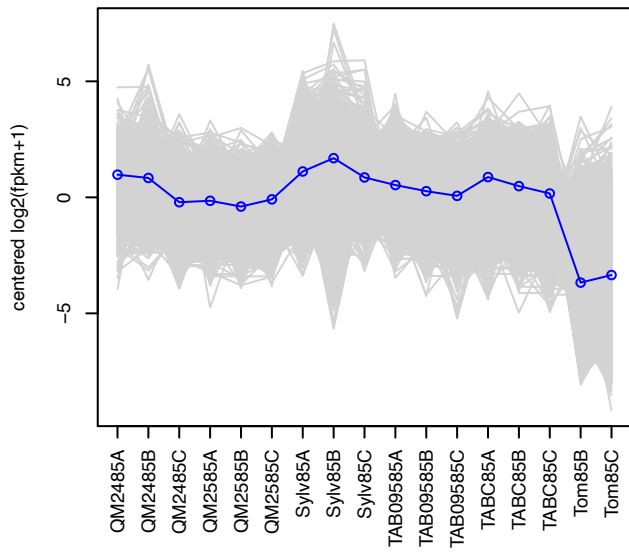

Subcluster 4; 353 transcripts

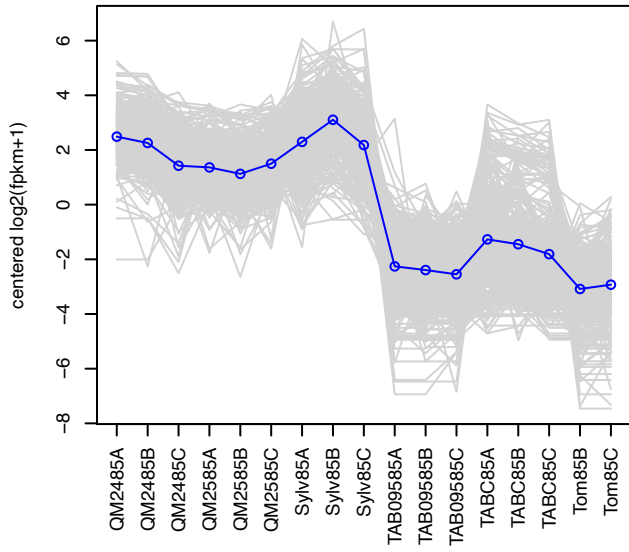

Subcluster 5; 1,986 transcripts

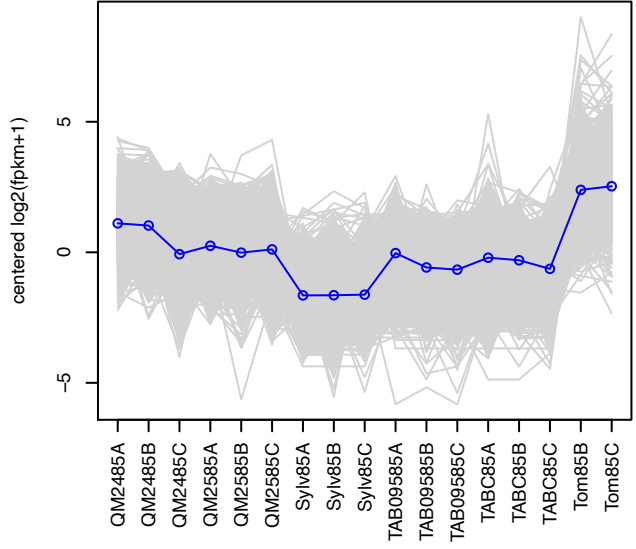

Subcluster 6; 137 transcripts

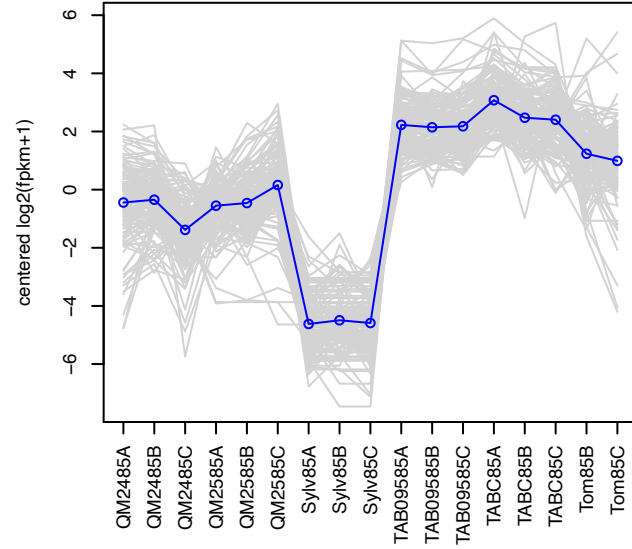

Subcluster 7; 646 transcripts

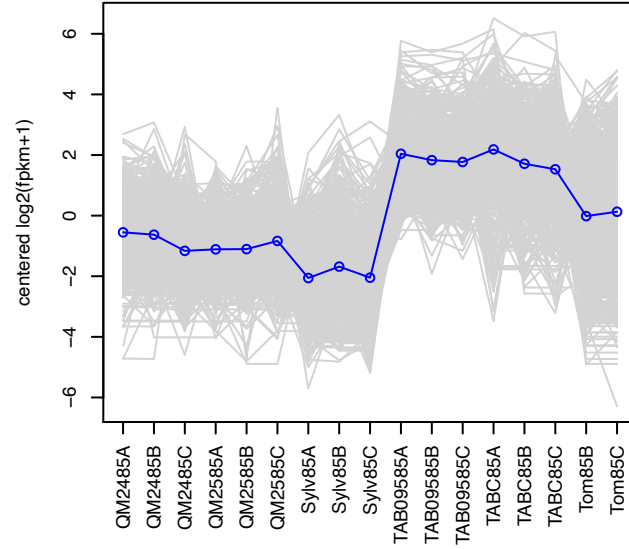

Subcluster 8; 520 transcripts

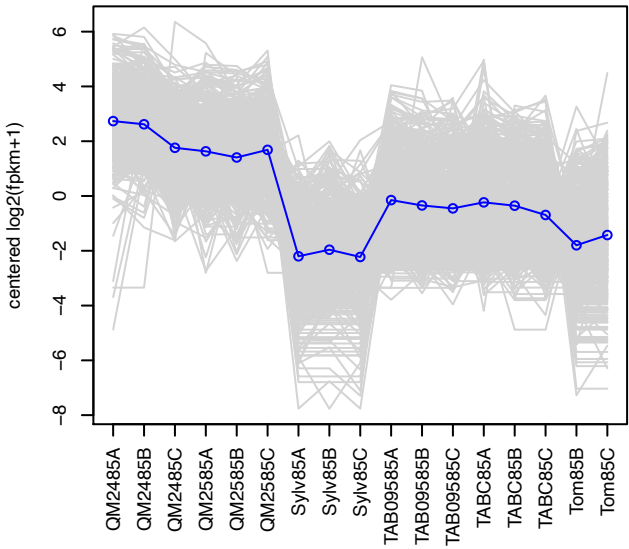

Subcluster 9; 215 transcripts

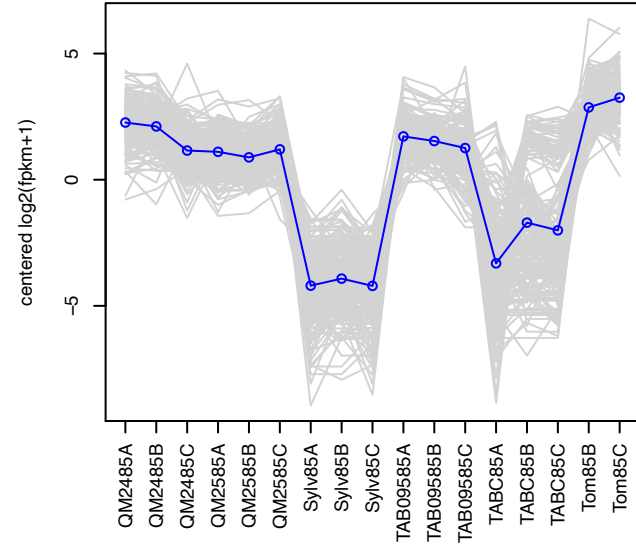

Subcluster 10; 181 transcripts

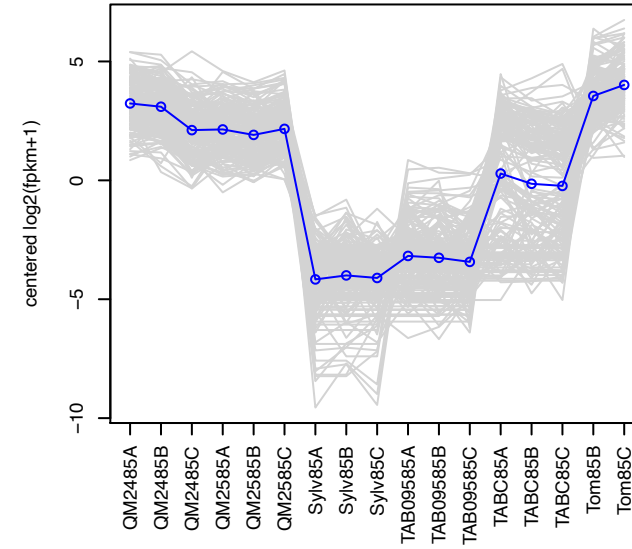

Subcluster 11; 375 transcripts

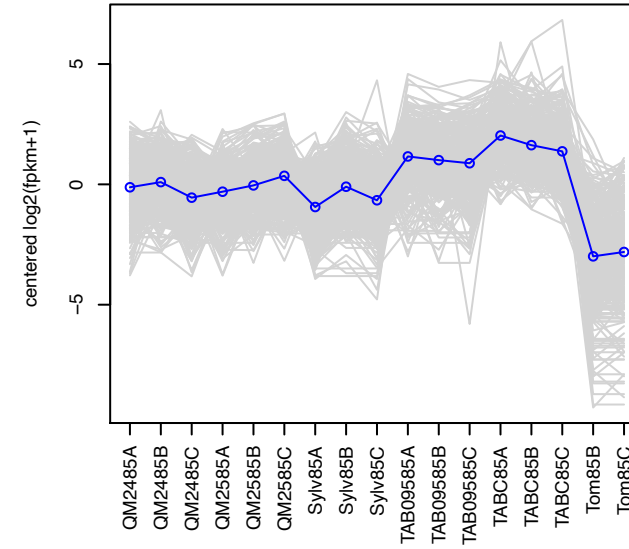

Subcluster 12; 18 transcripts

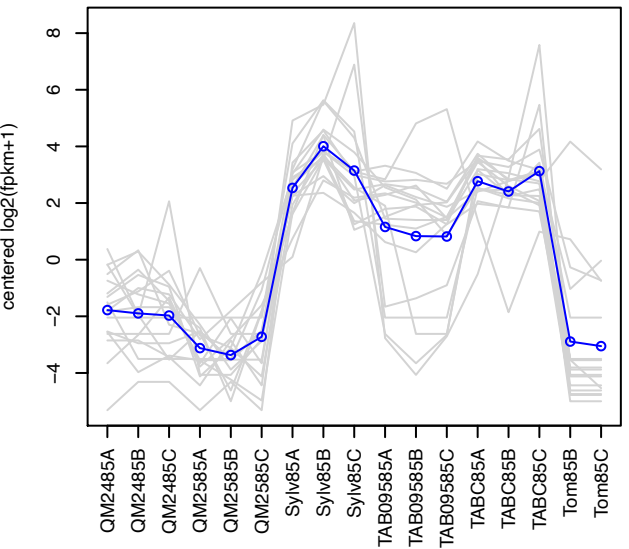

Supplement: s1 [file s1]
