# Supplementary material for: Differential Gene Expression with an Emphasis on Floral Organ Size Differences in Natural and Synthetic Polyploids of Nicotiana tabacum (Solanaceae)
Source: MDPI journal article supplement (doi:10.3390/genes11091097), 2020-09-19

Subcluster 1; 13,591 transcripts

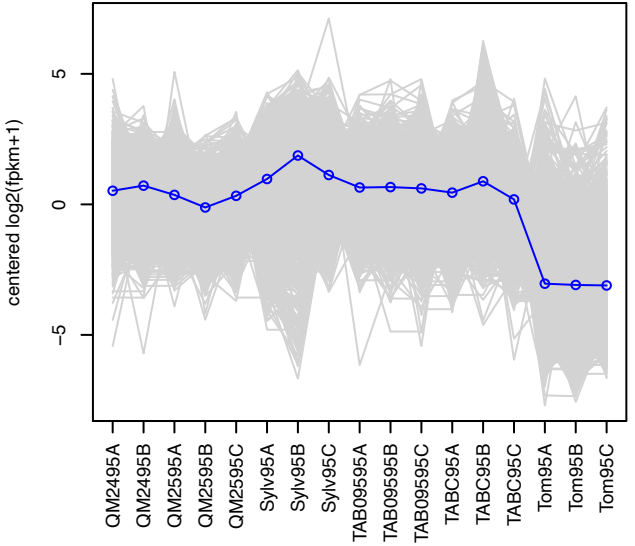

Subcluster 2; 11,393 transcripts

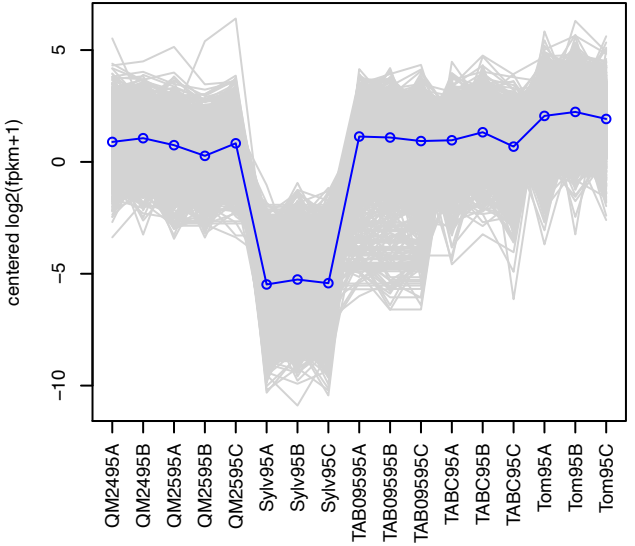

Subcluster 3; 10,385 transcripts

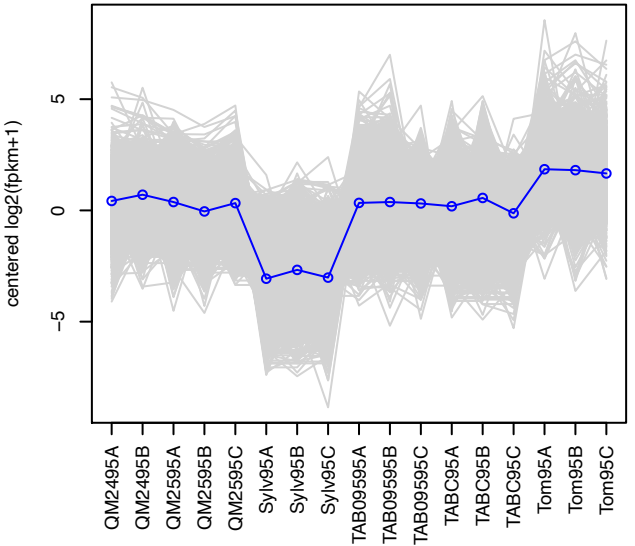

Subcluster 4; 7,205 transcripts

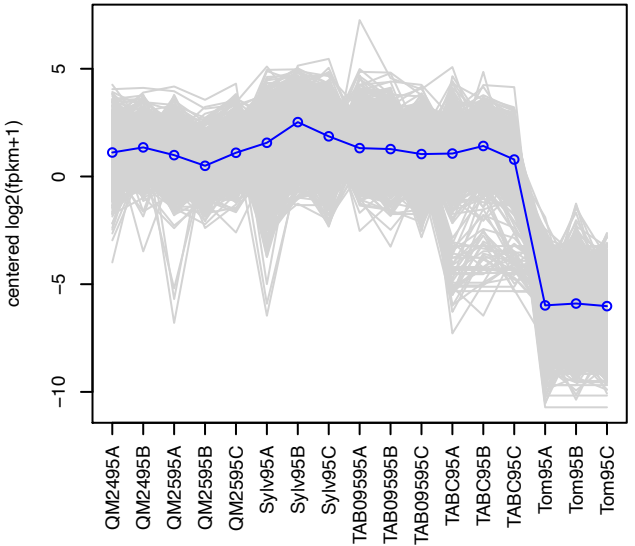

Subcluster 5; 2,405 transcripts

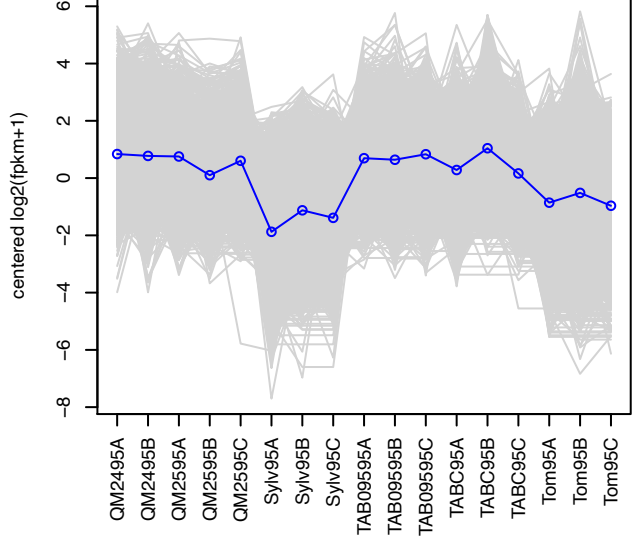

Subcluster 6; 885 transcripts

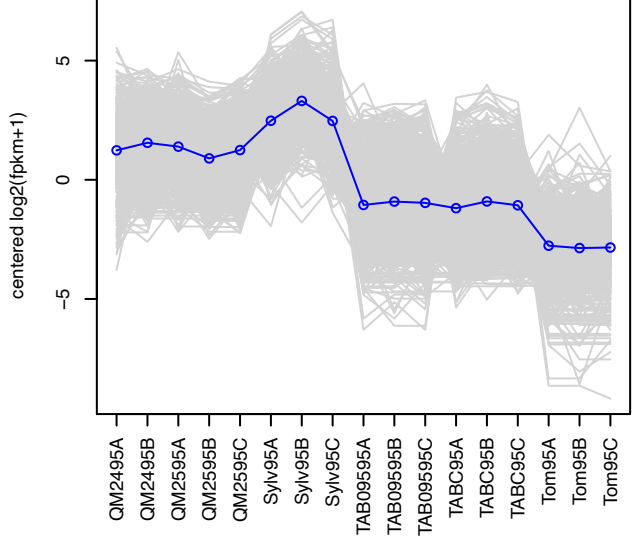

Subcluster 7; 254 transcripts

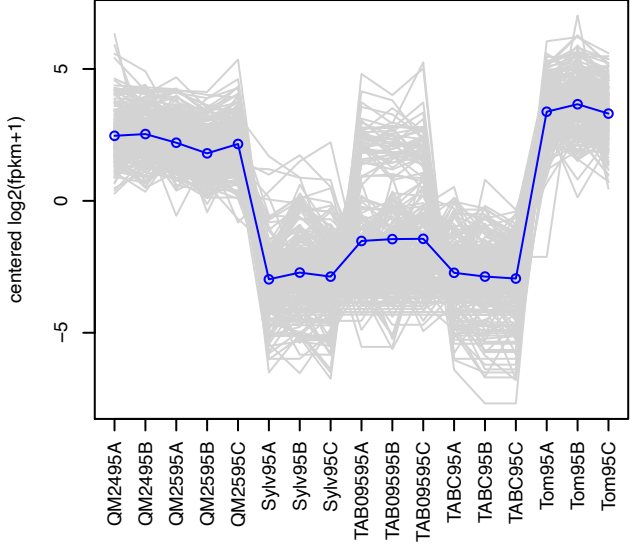

Subcluster 8; 185 transcripts

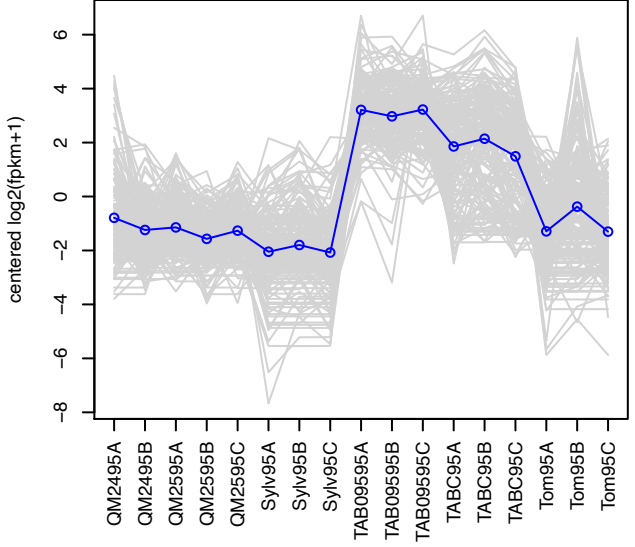

Subcluster 9; 93 transcripts

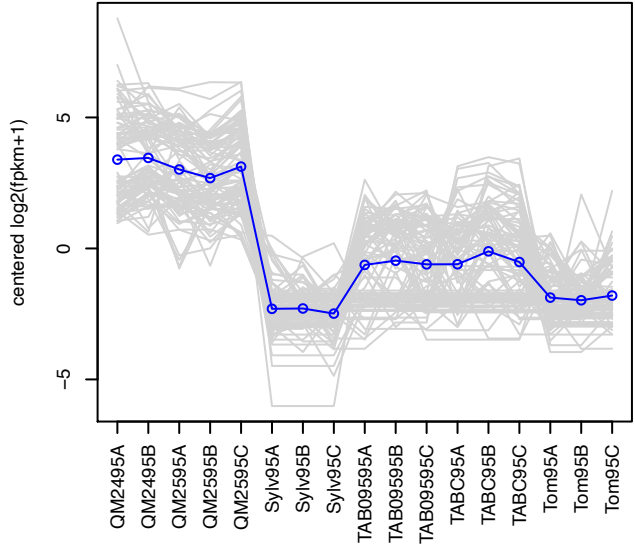

Subcluster 10; 122 transcripts

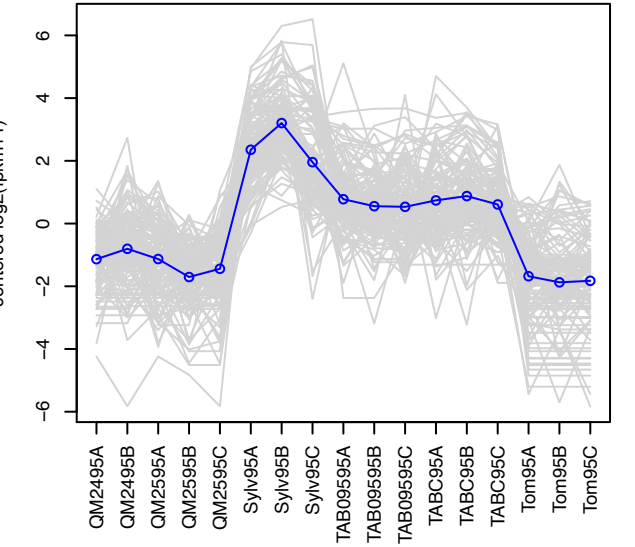

Subcluster 11; 40 transcripts

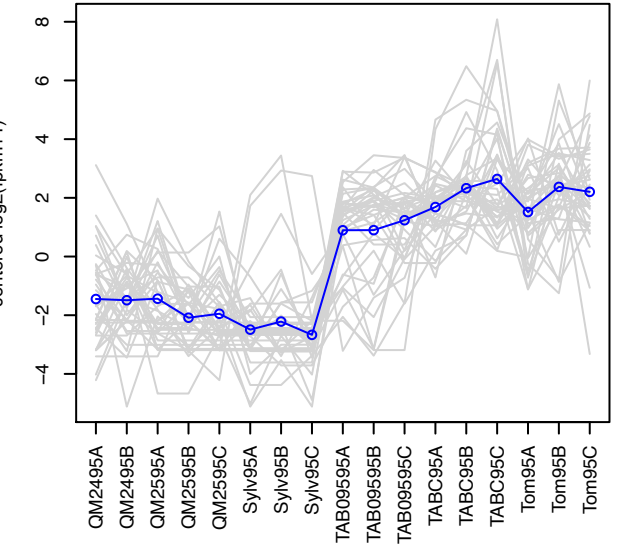

Supplement: s1 [file s1]
