# Supplementary material for: Differential Gene Expression with an Emphasis on Floral Organ Size Differences in Natural and Synthetic Polyploids of Nicotiana tabacum (Solanaceae)
Source: Genes (Basel). 2020 Sep 19;11(9):1097. doi: 10.3390/genes11091097 (PMC7563459; doi:10.3390/genes11091097)
Supplement: Supplementary file 1 [file genes-11-01097-s001.zip]

Archive with 23 entries (23 files):
- Supplemental Figure S1.pdf
- __MACOSX/._Supplemental Figure S1.pdf
- Supplemental Figure S2.png
- __MACOSX/._Supplemental Figure S2.png
- Supplemental Figure S3.pdf
- __MACOSX/._Supplemental Figure S3.pdf
- Supplemental Figure S4.pdf
- __MACOSX/._Supplemental Figure S4.pdf
- Supplemental Figure S5.pdf
- __MACOSX/._Supplemental Figure S5.pdf
- Supplemental Figure S6.pdf
- __MACOSX/._Supplemental Figure S6.pdf
- Supplemental Figure S7.pdf
- __MACOSX/._Supplemental Figure S7.pdf
- Supplemental Figure S8.pdf
- __MACOSX/._Supplemental Figure S8.pdf
- Supplemental Table S1.xlsx
- Supplemental Table S2.docx
- Supplemental Table S3.xlsx
- Supplemental Table S4.xlsx
- Supplemental Table S5.xlsx
- __MACOSX/._Supplemental Table S5.xlsx
- Supplemental Table S6.xlsx
