# Supplementary material for: Differential Gene Expression with an Emphasis on Floral Organ Size Differences in Natural and Synthetic Polyploids of Nicotiana tabacum (Solanaceae)
Source: Genes (Basel). 2020 Sep 19;11(9):1097. doi: 10.3390/genes11091097 (PMC7563459; doi:10.3390/genes11091097)
Supplement: Supplementary file 1 [file genes-11-01097-s001.zip › Supplemental Table S1.xlsx]

## Sheet: Sheet1
Species	Accession	Cleaned reads	Percent mapping	SRA number
N. tabacum	095-55 a 60	20414509	0.8379	SRR6434953
N. tabacum	095-55 a 85	18532609	0.818	SRR6434938
N. tabacum	095-55 a 95	18750428	0.7975	SRR6434935
N. tabacum	095-55 b 60	10764738	0.8667	SRR6434966
N. tabacum	095-55 b 85	15890475	0.8235	SRR6434937
N. tabacum	095-55 b 95	19642883	0.7525	SRR6434934
N. tabacum	095-55 c 60	17515703	0.7809	SRR6434967
N. tabacum	095-55 c 85	13656442	0.8371	SRR6434936
N. tabacum	095-55 c 95	14527865	0.8557	SRR6434933
N. tabacum	Chulu a 60	14347593	0.842	SRR6434932
N. tabacum	Chulu a 85	21064409	0.9042	SRR6434929
N. tabacum	Chulu a 95	15193694	0.8367	SRR6434962
N. tabacum	Chulu b 60	15746001	0.8184	SRR6434931
N. tabacum	Chulu b 85	16263072	0.8762	SRR6434960
N. tabacum	Chulu b 95	22995536	0.7905	SRR6434963
N. tabacum	Chulu c 60	11881971	0.8307	SRR6434930
N. tabacum	Chulu c 85	14885499	0.8442	SRR6434961
N. tabacum	Chulu c 95	13986461	0.8009	SRR6434964
N. sylvestris	N. sylvestris 60% Nanopore	1728564	NA	SRR12045994
N. sylvestris	N. sylvestris 95% Nanopore	995999	NA	SRR12045993
N. sylvestris	N. sylvestris ENA	189054454	NA	ERR274387
N. sylvestris	N. sylvestris ENA	205776464	NA	ERR274388
N. sylvestris	N. sylvestris ENA	116423824	NA	ERR274389
N. tomentosiformis	N. tomentosiformis 60% Nanopore	992903	NA	SRR12045992
N. tomentosiformis	N. tomentosiformis 95% Nanopore	1662706	NA	SRR12045991
N. tomentosiformis	N. tomentosiformis ENA	169810160	NA	ERR274396
N. tomentosiformis	N. tomentosiformis ENA	234553072	NA	ERR274397
N. tomentosiformis	N. tomentosiformis ENA	275678598	NA	ERR274398
N. tomentosiformis	N. tomentosiformis ENA	103519904	NA	ERR274399
N. tabacum	QM24a 60	15270433	0.7664	SRR6434965
N. tabacum	QM24a 85	29310584	0.7606	SRR6434950
N. tabacum	QM24a 95	17318007	0.7835	SRR6434922
N. tabacum	QM24b 85	26534466	0.7728	SRR6434968
N. tabacum	QM24b 95	20121602	0.7507	SRR6434921
N. tabacum	QM24c 60	26063547	0.814	SRR6434949
N. tabacum	QM24c 85	13976483	0.8982	SRR6434969
N. tabacum	QM25a 60	15169471	0.7941	SRR6434924
N. tabacum	QM25a 85	14236339	0.7884	SRR6434925
N. tabacum	QM25a 95	15806305	0.9063	SRR6434920
N. tabacum	QM25b 60	20229652	0.7675	SRR6434923
N. tabacum	QM25b 85	11149438	0.8235	SRR6434928
N. tabacum	QM25b 95	11243020	0.7894	SRR6434919
N. tabacum	QM25c 60	12971405	0.833	SRR6434926
N. tabacum	QM25c 85	14521129	0.9217	SRR6434927
N. tabacum	QM25c 95	17498932	0.7828	SRR6434951
N. sylvestris	sylv a 60	14246974	0.8528	SRR6434947
N. sylvestris	sylv a 85	17911463	0.761	SRR6434946
N. sylvestris	sylv a 95	11609467	0.8225	SRR6434941
N. sylvestris	sylv b 60	17368627	0.7806	SRR6434948
N. sylvestris	sylv b 85	21605712	0.8129	SRR6434943
N. sylvestris	sylv b 95	20788277	0.844	SRR6434942
N. sylvestris	sylv c 60	15233775	0.8223	SRR6434945
N. sylvestris	sylv c 85	11936815	0.8097	SRR6434944
N. sylvestris	sylv c 95	14013271	0.8281	SRR6434939
N. tomentosiformis	tomf a 60	15435440	0.8462	SRR6434940
N. tomentosiformis	tomf a 95	19244587	0.7646	SRR6434954
N. tomentosiformis	tomf b 60	15990152	0.8701	SRR6434958
N. tomentosiformis	tomf b 85	21053163	0.9227	SRR6434957
N. tomentosiformis	tomf b 95	20324816	0.798	SRR6434955
N. tomentosiformis	tomf c 60	13043179	0.821	SRR6434959
N. tomentosiformis	tomf c 85	21053163	0.9227	SRR6434956
N. tomentosiformis	tomf c 95	17569838	0.7866	SRR6434952
