# Supplementary material for: Differential Gene Expression with an Emphasis on Floral Organ Size Differences in Natural and Synthetic Polyploids of Nicotiana tabacum (Solanaceae)
Source: Genes (Basel). 2020 Sep 19;11(9):1097. doi: 10.3390/genes11091097 (PMC7563459; doi:10.3390/genes11091097)
Supplement: Supplementary file 1 [file genes-11-01097-s001.zip › Supplemental Table S3.xlsx]

## Sheet: Ntomentosiformis_unique_cluster
N. tomentosiformis				N. sylvestris
GO Number	GO annotation	Number of proteins		GO Number	GO annotation	Number of proteins
GO:0008150	biological_process	163		GO:0008150	biological_process	160
GO:0008152	metabolic process	89		GO:0008152	metabolic process	86
GO:0009987	cellular process	76		GO:0009987	cellular process	74
GO:0043170	macromolecule metabolic process	65		GO:0044237	cellular metabolic process	66
GO:0044237	cellular metabolic process	65		GO:0050896	response to stimulus	61
GO:0050896	response to stimulus	52		GO:0043170	macromolecule metabolic process	51
GO:0044238	primary metabolic process	41		GO:0065007	biological regulation	45
GO:0065007	biological regulation	38		GO:0006807	nitrogen compound metabolic process	43
GO:0006807	nitrogen compound metabolic process	36		GO:0044238	primary metabolic process	35
GO:0016070	RNA metabolic process	32		GO:0046483	heterocycle metabolic process	29
GO:0046483	heterocycle metabolic process	31		GO:0006725	cellular aromatic compound metabolic process	28
GO:0006725	cellular aromatic compound metabolic process	30		GO:0016070	RNA metabolic process	28
GO:0032502	developmental process	29		GO:0032502	developmental process	28
GO:0032501	multicellular organismal process	27		GO:0006139	nucleobase-containing compound metabolic process	22
GO:0006139	nucleobase-containing compound metabolic process	25		GO:0051234	establishment of localization	22
GO:0006464	cellular protein modification process	21		GO:0006810	transport	21
GO:0005975	carbohydrate metabolic process	16		GO:0032501	multicellular organismal process	20
GO:0016043	cellular component organization	14		GO:0006464	cellular protein modification process	17
GO:0019538	protein metabolic process	14		GO:0005975	carbohydrate metabolic process	16
GO:0000003	reproduction	13		GO:0006412	translation	15
GO:0006810	transport	13		GO:0007154	cell communication	14
GO:0051234	establishment of localization	13		GO:0051179	localization	12
GO:0051704	multi-organism process	12		GO:0006082	organic acid metabolic process	11
GO:0006396	RNA processing	11		GO:0019538	protein metabolic process	11
GO:0006412	translation	10		GO:0051641	cellular localization	11
GO:0006508	proteolysis	10		GO:0000003	reproduction	10
GO:0006793	phosphorus metabolic process	10		GO:0016043	cellular component organization	10
GO:0015031	protein transport	10		GO:0016192	vesicle-mediated transport	10
GO:0005976	polysaccharide metabolic process	9		GO:0006396	RNA processing	9
GO:0007154	cell communication	9		GO:0006629	lipid metabolic process	9
GO:0051179	localization	9		GO:0006793	phosphorus metabolic process	9
GO:0006082	organic acid metabolic process	8		GO:0032989	cellular component morphogenesis	8
GO:0006629	lipid metabolic process	8		GO:0043603	cellular amide metabolic process	8
GO:0043412	macromolecule modification	8		GO:0006508	proteolysis	7
GO:0040007	growth	7		GO:0006518	peptide metabolic process	7
GO:0006259	DNA metabolic process	6		GO:0015031	protein transport	7
GO:0007049	cell cycle	6		GO:0040007	growth	7
GO:0016049	cell growth	6		GO:0051186	cofactor metabolic process	7
GO:0016192	vesicle-mediated transport	6		GO:0051704	multi-organism process	7
GO:0032989	cellular component morphogenesis	6		GO:0005976	polysaccharide metabolic process	6
GO:0042254	ribosome biogenesis	5		GO:0006811	ion transport	6
GO:0051641	cellular localization	5		GO:0043412	macromolecule modification	6
GO:0006518	peptide metabolic process	4		GO:0006996	organelle organization	5
GO:0016458	gene silencing	4		GO:0042254	ribosome biogenesis	5
GO:0043603	cellular amide metabolic process	4		GO:0044255	cellular lipid metabolic process	5
GO:0044255	cellular lipid metabolic process	4		GO:0002376	immune system process	4
GO:0000280	nuclear division	3		GO:0006259	DNA metabolic process	4
GO:0002376	immune system process	3		GO:0007005	mitochondrion organization	4
GO:0006766	vitamin metabolic process	3		GO:0016049	cell growth	4
GO:0015074	DNA integration	3		GO:0042440	pigment metabolic process	3
GO:0051186	cofactor metabolic process	3		GO:0006281	DNA repair	2
GO:0051301	cell division	3		GO:0006457	protein folding	2
GO:0006996	organelle organization	2		GO:0006766	vitamin metabolic process	2
GO:0008283	cell proliferation	2		GO:0007049	cell cycle	2
GO:0008643	carbohydrate transport	2		GO:0009308	amine metabolic process	2
GO:0009116	nucleoside metabolic process	2		GO:0009657	plastid organization	2
GO:0015931	nucleobase-containing compound transport	2		GO:0015074	DNA integration	2
GO:0019748	secondary metabolic process	2		GO:0015931	nucleobase-containing compound transport	2
GO:0022607	cellular component assembly	2		GO:0015979	photosynthesis	2
GO:0034622	cellular macromolecular complex assembly	2		GO:0016032	viral process	2
GO:0048285	organelle fission	2		GO:0019748	secondary metabolic process	2
GO:0048469	cell maturation	2		GO:0022607	cellular component assembly	2
GO:0071555	cell wall organization	2		GO:0043094	cellular metabolic compound salvage	2
GO:0006066	alcohol metabolic process	1		GO:0065003	macromolecular complex assembly	2
GO:0006081	cellular aldehyde metabolic process	1		GO:0000280	nuclear division	1
GO:0006091	generation of precursor metabolites and energy	1		GO:0006081	cellular aldehyde metabolic process	1
GO:0006281	DNA repair	1		GO:0006260	DNA replication	1
GO:0006304	DNA modification	1		GO:0006662	glycerol ether metabolic process	1
GO:0006323	DNA packaging	1		GO:0006928	movement of cell or subcellular component	1
GO:0006457	protein folding	1		GO:0006949	syncytium formation	1
GO:0006730	one-carbon metabolic process	1		GO:0007059	chromosome segregation	1
GO:0006811	ion transport	1		GO:0009117	nucleotide metabolic process	1
GO:0006865	amino acid transport	1		GO:0010118	stomatal movement	1
GO:0006869	lipid transport	1		GO:0016050	vesicle organization	1
GO:0008037	cell recognition	1		GO:0022406	membrane docking	1
GO:0009117	nucleotide metabolic process	1		GO:0022411	cellular component disassembly	1
GO:0010118	stomatal movement	1		GO:0031647	regulation of protein stability	1
GO:0015849	organic acid transport	1		GO:0032196	transposition	1
GO:0015979	photosynthesis	1		GO:0034622	cellular macromolecular complex assembly	1
GO:0016050	vesicle organization	1		GO:0043062	extracellular structure organization	1
GO:0022411	cellular component disassembly	1		GO:0045229	external encapsulating structure organization	1
GO:0040011	locomotion	1		GO:0045333	cellular respiration	1
GO:0043062	extracellular structure organization	1		GO:0046903	secretion	1
GO:0043094	cellular metabolic compound salvage	1		GO:0048284	organelle fusion	1
GO:0044419	interspecies interaction between organisms	1		GO:0048469	cell maturation	1
GO:0045229	external encapsulating structure organization	1		GO:0051258	protein polymerization	1
GO:0046794	transport of virus	1		GO:0051261	protein depolymerization	1
GO:0046903	secretion	1		GO:0051276	chromosome organization	1
GO:0048284	organelle fusion	1		GO:0051604	protein maturation	1
GO:0048511	rhythmic process	1		GO:0051640	organelle localization	1
GO:0051604	protein maturation	1		GO:0071555	cell wall organization	1
GO:0051606	detection of stimulus	1
GO:0065003	macromolecular complex assembly	1
