# Supplementary material for: Differential Gene Expression with an Emphasis on Floral Organ Size Differences in Natural and Synthetic Polyploids of Nicotiana tabacum (Solanaceae)
Source: Genes (Basel). 2020 Sep 19;11(9):1097. doi: 10.3390/genes11091097 (PMC7563459; doi:10.3390/genes11091097)
Supplement: Supplementary file 1 [file genes-11-01097-s001.zip › Supplemental Table S4.xlsx]

## Sheet: DE60_subclusters_and_annotation
Subcluster	Contig	Annotation	QM2460A	QM2460C	QM2560A	QM2560B	QM2560C	Sylv60A	Sylv60B	Sylv60C	TAB09560A	TAB09560B	TAB09560C	TABC60A	TABC60B	TABC60C	Tom60A	Tom60B	Tom60C
1	Nsylvestris_NODE_10_length_13090_cov_33	YG31B_YEAST^YG31B_YEAST^Q:8633-7719,H:535-827^32.258%ID^E:6.46e-31^RecName: Full=Transposon Ty3-G Gag-Pol polyprotein;^Eukaryota; Fungi; Dikarya; Ascomycota; Saccharomycotina; Saccharomycetes; Saccharomycetales; Saccharomycetaceae; Saccharomyces`YG31B_YEAST^YG31B_YEAST^Q:7633-7562,H:857-880^45.833%ID^E:6.46e-31^RecName: Full=Transposon Ty3-G Gag-Pol polyprotein;^Eukaryota; Fungi; Dikarya; Ascomyc…	0.147579	1.65347	0.548117	-0.103959	0.410614	1.99558	1.92999	0.258611	1.86128	0.751651	1.43446	0.673648	1.17615	0.751651	-4.49628	-4.49628	-4.49628
1	Nsylvestris_NODE_100_length_8432_cov_116	NAT1_ARATH^NAT1_ARATH^Q:5315-3831,H:26-520^85.253%ID^E:0^RecName: Full=Nucleobase-ascorbate transporter 1;^Eukaryota; Viridiplantae; Streptophyta; Embryophyta; Tracheophyta; Spermatophyta; Magnoliopsida; eudicotyledons; Gunneridae; Pentapetalae; rosids; malvids; Brassicales; Brassicaceae; Camelineae; Arabidopsis	0.356103	1.04255	0.0868758	0.230236	-0.377598	1.47663	1.41512	1.36284	0.773688	-0.423047	0.529107	0.357925	0.311108	-0.122795	-2.4126	-2.01199	-2.59416
1	Nsylvestris_NODE_1000_length_4954_cov_107	BSL2_ARATH^BSL2_ARATH^Q:3378-4040,H:64-284^86.878%ID^E:2.38e-106^RecName: Full=Serine/threonine-protein phosphatase BSL2;^Eukaryota; Viridiplantae; Streptophyta; Embryophyta; Tracheophyta; Spermatophyta; Magnoliopsida; eudicotyledons; Gunneridae; Pentapetalae; rosids; malvids; Brassicales; Brassicaceae; Camelineae; Arabidopsis	-0.062606	0.777336	-0.336736	-0.257105	-0.674351	1.12286	1.41445	1.31102	0.877684	0.249807	0.764311	0.184064	0.263028	0.616305	-2.01943	-1.99791	-2.23273
1	Nsylvestris_NODE_10002_length_2115_cov_164	.	0.127293	1.44163	0.399213	-0.135621	1.14847	0.998536	1.09325	0.820086	0.90945	0.297685	0.143426	0.126692	0.630041	0.967994	-4.45827	-2.85895	-1.65092
1	Nsylvestris_NODE_10007_length_2114_cov_202	STP7_ARATH^STP7_ARATH^Q:1859-345,H:1-510^76.863%ID^E:0^RecName: Full=Sugar transport protein 7;^Eukaryota; Viridiplantae; Streptophyta; Embryophyta; Tracheophyta; Spermatophyta; Magnoliopsida; eudicotyledons; Gunneridae; Pentapetalae; rosids; malvids; Brassicales; Brassicaceae; Camelineae; Arabidopsis	0.192355	0.898501	-0.119487	0.66797	-0.381549	1.8408	1.96724	1.70871	0.895563	-0.246492	0.456532	0.232493	0.776629	0.10545	-3.89293	-2.56474	-2.53705
1	Nsylvestris_NODE_10008_length_2114_cov_101	FBL17_ARATH^FBL17_ARATH^Q:1959-205,H:5-587^59.899%ID^E:0^RecName: Full=F-box/LRR-repeat protein 17;^Eukaryota; Viridiplantae; Streptophyta; Embryophyta; Tracheophyta; Spermatophyta; Magnoliopsida; eudicotyledons; Gunneridae; Pentapetalae; rosids; malvids; Brassicales; Brassicaceae; Camelineae; Arabidopsis	0.564046	1.17233	0.0157864	-0.0890686	0.390832	1.42931	1.48516	0.268841	0.506909	0.260757	0.46826	0.120135	-1.0123	-0.174765	-1.81862	-1.76899	-1.81862
1	Nsylvestris_NODE_10009_length_2114_cov_91	RAC1_LOTJA^RAC1_LOTJA^Q:2014-1655,H:1-120^90.833%ID^E:2.01e-68^RecName: Full=Rac-like GTP-binding protein RAC1;^Eukaryota; Viridiplantae; Streptophyta; Embryophyta; Tracheophyta; Spermatophyta; Magnoliopsida; eudicotyledons; Gunneridae; Pentapetalae; rosids; fabids; Fabales; Fabaceae; Papilionoideae; 50 kb inversion clade; NPAAA clade; Hologalegina; robinioid clade; Loteae; Lotus	0.294264	1.39883	0.0419151	0.865273	-0.516627	1.69275	2.18423	1.39716	1.44367	-0.00946488	0.434463	-0.245565	-0.0541822	-0.480542	-2.76687	-2.97501	-2.7043
1	Nsylvestris_NODE_1001_length_4951_cov_111	POLX_TOBAC^POLX_TOBAC^Q:179-2923,H:1-915^98.798%ID^E:0^RecName: Full=Retrovirus-related Pol polyprotein from transposon TNT 1-94;^Eukaryota; Viridiplantae; Streptophyta; Embryophyta; Tracheophyta; Spermatophyta; Magnoliopsida; eudicotyledons; Gunneridae; Pentapetalae; asterids; lamiids; Solanales; Solanaceae; Nicotianoideae; Nicotianeae; Nicotiana`POLX_TOBAC^POLX_TOBAC^Q:4775-4951,H:865-923^91.52…	0.028653	1.08441	-0.663035	-0.92834	-1.30945	1.60288	1.1909	1.63699	1.10809	-0.193439	0.614438	0.515245	1.03571	0.501293	-1.82029	-2.22942	-2.17463
1	Nsylvestris_NODE_10010_length_2114_cov_49	.	0.256235	1.45787	0.0772646	1.00756	-0.650656	0.724384	1.79229	0.934307	0.371712	-0.480731	0.30354	-0.743765	0.539169	-1.0068	-1.25834	-1.48073	-1.8433
1	Nsylvestris_NODE_10011_length_2114_cov_44	GPAT1_ARATH^GPAT1_ARATH^Q:118-1572,H:7-545^54.529%ID^E:0^RecName: Full=Glycerol-3-phosphate acyltransferase 1;^Eukaryota; Viridiplantae; Streptophyta; Embryophyta; Tracheophyta; Spermatophyta; Magnoliopsida; eudicotyledons; Gunneridae; Pentapetalae; rosids; malvids; Brassicales; Brassicaceae; Camelineae; Arabidopsis`GPAT1_ARATH^GPAT1_ARATH^Q:1723-1863,H:538-584^68.085%ID^E:2.25e-11^RecName: Full=…	0.411491	1.18267	0.33242	0.812029	-0.0359678	2.10749	1.49556	1.54899	0.977088	0.522523	1.69047	1.13687	-0.116888	0.0653155	-4.81733	-3.4954	-3.81733
1	Nsylvestris_NODE_10012_length_2114_cov_39	.	1.98025	2.98025	1.6754	0.395292	2.44592	-1.41206	0.172899	-0.827101	0.637567	-0.408461	0.757862	0.168082	1.08235	-2.41206	-2.41206	-2.41206	-2.41206
1	Nsylvestris_NODE_10014_length_2113_cov_229	SYNC1_ARATH^SYNC1_ARATH^Q:131-1849,H:11-572^68.912%ID^E:0^RecName: Full=Asparagine--tRNA ligase, cytoplasmic 1 {ECO:0000305};^Eukaryota; Viridiplantae; Streptophyta; Embryophyta; Tracheophyta; Spermatophyta; Magnoliopsida; eudicotyledons; Gunneridae; Pentapetalae; rosids; malvids; Brassicales; Brassicaceae; Camelineae; Arabidopsis	0.38857	0.955936	0.493485	1.08719	0.12807	1.32182	0.972769	1.20753	0.803898	-0.597168	-0.0374185	0.0074496	0.277802	-0.422456	-2.11757	-1.52338	-2.94653
1	Nsylvestris_NODE_10017_length_2113_cov_207	.	0.392076	1.1391	-0.153978	0.490878	0.458836	1.68965	1.7683	1.04112	0.993353	0.159714	0.9593	0.6146	0.975917	0.463062	-2.68807	-4.35276	-3.9511
1	Nsylvestris_NODE_1002_length_4951_cov_41	TF29_SCHPO^TF29_SCHPO^Q:2316-3518,H:478-890^34.053%ID^E:1.09e-114^RecName: Full=Transposon Tf2-9 polyprotein;^Eukaryota; Fungi; Dikarya; Ascomycota; Taphrinomycotina; Schizosaccharomycetes; Schizosaccharomycetales; Schizosaccharomycetaceae; Schizosaccharomyces`TF29_SCHPO^TF29_SCHPO^Q:3556-4512,H:907-1220^33.125%ID^E:1.09e-114^RecName: Full=Transposon Tf2-9 polyprotein;^Eukaryota; Fungi; Dikarya; …	0.655825	2.04589	-0.481679	0.0708624	-0.218644	1.89683	0.896833	1.85936	1.08262	0.0708624	1.28386	1.19639	0.873338	0.933359	-3.38857	-4.38857	-4.38857
1	Nsylvestris_NODE_10021_length_2113_cov_116	DGP10_ARATH^DGP10_ARATH^Q:1620-193,H:107-583^78.407%ID^E:0^RecName: Full=Protease Do-like 10, mitochondrial;^Eukaryota; Viridiplantae; Streptophyta; Embryophyta; Tracheophyta; Spermatophyta; Magnoliopsida; eudicotyledons; Gunneridae; Pentapetalae; rosids; malvids; Brassicales; Brassicaceae; Camelineae; Arabidopsis	1.15632	2.15731	0.400041	1.41339	0.264481	1.48023	1.72732	1.7139	0.940756	0.106656	0.900332	0.131499	0.481497	0.482131	-5.02756	-5.02756	-3.30073
1	Nsylvestris_NODE_10024_length_2113_cov_77	.	0.882387	1.64563	0.417392	0.846673	0.665319	1.39467	1.95655	1.64621	1.39353	-0.495146	1.07417	0.504854	1.18796	0.627625	-4.58261	-4.58261	-4.58261
1	Nsylvestris_NODE_10025_length_2113_cov_31	TMVRN_NICGU^TMVRN_NICGU^Q:457-2013,H:14-535^47.727%ID^E:1.31e-158^RecName: Full=TMV resistance protein N;^Eukaryota; Viridiplantae; Streptophyta; Embryophyta; Tracheophyta; Spermatophyta; Magnoliopsida; eudicotyledons; Gunneridae; Pentapetalae; asterids; lamiids; Solanales; Solanaceae; Nicotianoideae; Nicotianeae; Nicotiana	0.399237	1.83321	0.267099	-1.57352	-1.54437	1.73312	1.89303	1.88413	1.84244	1.07387	1.57885	-0.781669	0.523725	-1.32611	-3.12933	-1.54437	-3.12933
1	Nsylvestris_NODE_10026_length_2113_cov_9	PP111_ARATH^PP111_ARATH^Q:2107-2,H:52-752^54.196%ID^E:0^RecName: Full=Putative pentatricopeptide repeat-containing protein At1g69350, mitochondrial;^Eukaryota; Viridiplantae; Streptophyta; Embryophyta; Tracheophyta; Spermatophyta; Magnoliopsida; eudicotyledons; Gunneridae; Pentapetalae; rosids; malvids; Brassicales; Brassicaceae; Camelineae; Arabidopsis`PP111_ARATH^PP111_ARATH^Q:1954-260,H:4-565^…	0.618208	1.20317	-1.22979	-0.229789	-1.22979	0.448283	1.03325	0.770211	0.770211	1.14872	0.770932	-0.966755	-0.0922855	0.148723	-0.381792	-1.55172	-1.22979
1	Nsylvestris_NODE_10028_length_2112_cov_225	ASOL_TOBAC^ASOL_TOBAC^Q:1943-300,H:9-554^68.478%ID^E:0^RecName: Full=L-ascorbate oxidase homolog;^Eukaryota; Viridiplantae; Streptophyta; Embryophyta; Tracheophyta; Spermatophyta; Magnoliopsida; eudicotyledons; Gunneridae; Pentapetalae; asterids; lamiids; Solanales; Solanaceae; Nicotianoideae; Nicotianeae; Nicotiana	1.22211	4.51872	1.93263	-0.0756917	2.59331	-0.0350111	-4.05727	-0.505641	2.05285	-4.03546	0.34686	1.42904	0.0524252	-0.391606	-0.546818	-3.04996	-1.4505
1	Nsylvestris_NODE_10029_length_2112_cov_217	4CL2_TOBAC^4CL2_TOBAC^Q:202-1827,H:1-542^97.232%ID^E:0^RecName: Full=4-coumarate--CoA ligase 2;^Eukaryota; Viridiplantae; Streptophyta; Embryophyta; Tracheophyta; Spermatophyta; Magnoliopsida; eudicotyledons; Gunneridae; Pentapetalae; asterids; lamiids; Solanales; Solanaceae; Nicotianoideae; Nicotianeae; Nicotiana	0.462008	1.10769	0.690269	0.477701	0.156621	0.578593	0.722983	0.805534	0.487103	-0.515934	0.0488445	0.02536	0.574665	-0.274272	-2.5439	-1.32191	-1.48136
1	Nsylvestris_NODE_10033_length_2112_cov_143	UBA5_ARATH^UBA5_ARATH^Q:224-1318,H:1-364^80.654%ID^E:0^RecName: Full=Ubiquitin-like modifier-activating enzyme 5;^Eukaryota; Viridiplantae; Streptophyta; Embryophyta; Tracheophyta; Spermatophyta; Magnoliopsida; eudicotyledons; Gunneridae; Pentapetalae; rosids; malvids; Brassicales; Brassicaceae; Camelineae; Arabidopsis	-0.168817	0.560388	0.452735	1.1689	-0.219513	1.51236	1.40881	1.53145	0.672394	-0.209491	-0.285115	0.2922	0.826108	0.242593	-1.77219	-3.74256	-2.27024
1	Nsylvestris_NODE_10036_length_2111_cov_229	RFA1B_ARATH^RFA1B_ARATH^Q:156-1991,H:1-599^73.453%ID^E:0^RecName: Full=Replication protein A 70 kDa DNA-binding subunit B;^Eukaryota; Viridiplantae; Streptophyta; Embryophyta; Tracheophyta; Spermatophyta; Magnoliopsida; eudicotyledons; Gunneridae; Pentapetalae; rosids; malvids; Brassicales; Brassicaceae; Camelineae; Arabidopsis	0.096363	1.05989	0.475092	1.12547	0.861477	2.11568	1.46886	1.10356	0.621217	-0.187081	0.180644	-0.49126	-0.314413	-0.395697	-2.05181	-2.04414	-3.62385
1	Nsylvestris_NODE_10037_length_2111_cov_225	RH39_ARATH^RH39_ARATH^Q:1968-490,H:33-525^75.855%ID^E:0^RecName: Full=DEAD-box ATP-dependent RNA helicase 39;^Eukaryota; Viridiplantae; Streptophyta; Embryophyta; Tracheophyta; Spermatophyta; Magnoliopsida; eudicotyledons; Gunneridae; Pentapetalae; rosids; malvids; Brassicales; Brassicaceae; Camelineae; Arabidopsis	0.663176	1.655	0.38974	0.436106	0.0517692	1.33265	1.61162	1.58939	0.88578	0.255029	0.532268	0.175426	0.555807	0.241945	-3.84376	-2.96819	-3.56376
1	Nsylvestris_NODE_1004_length_4947_cov_63	LAG12_ARATH^LAG12_ARATH^Q:493-825,H:55-166^66.964%ID^E:2.31e-44^RecName: Full=LAG1 longevity assurance homolog 2;^Eukaryota; Viridiplantae; Streptophyta; Embryophyta; Tracheophyta; Spermatophyta; Magnoliopsida; eudicotyledons; Gunneridae; Pentapetalae; rosids; malvids; Brassicales; Brassicaceae; Camelineae; Arabidopsis	-0.0290011	1.23459	0.470704	0.475537	0.462248	1.42341	0.912887	1.05515	0.873866	-0.731429	0.49961	0.168163	0.29032	-0.189739	-2.00167	-2.17745	-2.73719
1	Nsylvestris_NODE_10041_length_2111_cov_152	.	0.543666	1.55237	0.379128	1.04195	-0.193971	2.11031	1.96751	1.81829	2.30609	0.732754	1.79112	0.802293	1.53119	0.0186347	-5.46711	-5.46711	-5.46711
1	Nsylvestris_NODE_10042_length_2111_cov_144	.	0.50606	1.43388	0.239037	0.71342	0.504067	2.28195	1.71169	1.07405	1.33743	0.561034	1.0109	0.190305	1.03476	0.782448	-5.15842	-3.06419	-5.15842
1	Nsylvestris_NODE_10043_length_2111_cov_132	ACOX4_ARATH^ACOX4_ARATH^Q:1908-982,H:1-309^80.583%ID^E:0^RecName: Full=Acyl-coenzyme A oxidase 4, peroxisomal;^Eukaryota; Viridiplantae; Streptophyta; Embryophyta; Tracheophyta; Spermatophyta; Magnoliopsida; eudicotyledons; Gunneridae; Pentapetalae; rosids; malvids; Brassicales; Brassicaceae; Camelineae; Arabidopsis	-0.312177	0.350377	-0.383304	-0.381483	-1.07855	1.99001	2.5602	2.02041	0.922555	0.383249	0.589247	0.117104	-0.206543	-0.484599	-2.21085	-1.39398	-2.48167
1	Nsylvestris_NODE_1005_length_4946_cov_79	CRK10_ARATH^CRK10_ARATH^Q:3905-4672,H:420-669^63.813%ID^E:1.15e-100^RecName: Full=Cysteine-rich receptor-like protein kinase 10;^Eukaryota; Viridiplantae; Streptophyta; Embryophyta; Tracheophyta; Spermatophyta; Magnoliopsida; eudicotyledons; Gunneridae; Pentapetalae; rosids; malvids; Brassicales; Brassicaceae; Camelineae; Arabidopsis`CRK10_ARATH^CRK10_ARATH^Q:2396-3127,H:149-384^42.683%ID^E:1.08e…	-0.286658	0.585463	-0.413785	-0.468156	-0.707557	2.6647	2.37936	2.38817	2.41621	1.33987	2.17314	1.29451	1.50367	1.09598	-4.09803	-6.23296	-5.63393
1	Nsylvestris_NODE_10053_length_2110_cov_167	AHL5_ARATH^AHL5_ARATH^Q:1026-424,H:159-378^49.333%ID^E:1.14e-44^RecName: Full=AT-hook motif nuclear-localized protein 5 {ECO:0000312|EMBL:FAA00276.1};^Eukaryota; Viridiplantae; Streptophyta; Embryophyta; Tracheophyta; Spermatophyta; Magnoliopsida; eudicotyledons; Gunneridae; Pentapetalae; rosids; malvids; Brassicales; Brassicaceae; Camelineae; Arabidopsis	-0.0121626	1.38266	-0.097818	0.25417	-0.68888	1.26701	1.00494	1.25634	0.897888	0.314243	0.561283	0.22704	-0.349554	0.247871	-1.29145	-3.14477	-1.8288
1	Nsylvestris_NODE_10054_length_2110_cov_120	MSP1_ORYSJ^MSP1_ORYSJ^Q:690-2108,H:26-520^46.881%ID^E:3.46e-121^RecName: Full=Leucine-rich repeat receptor protein kinase MSP1 {ECO:0000305};^Eukaryota; Viridiplantae; Streptophyta; Embryophyta; Tracheophyta; Spermatophyta; Magnoliopsida; Liliopsida; Poales; Poaceae; BOP clade; Oryzoideae; Oryzeae; Oryzinae; Oryza; Oryza sativa`MSP1_ORYSJ^MSP1_ORYSJ^Q:822-2081,H:426-864^34.318%ID^E:1.52e-38^RecNa…	0.416334	0.021271	-0.393766	-1.97873	0.021271	0.021271	1.02127	0.021271	0.343199	-0.978729	0.021271	0.606234	2.31332	2.4807	-0.978729	-0.978729	-1.97873
1	Nsylvestris_NODE_10055_length_2110_cov_115	PUB4_ARATH^PUB4_ARATH^Q:1365-652,H:531-774^27.347%ID^E:2.08e-11^RecName: Full=U-box domain-containing protein 4;^Eukaryota; Viridiplantae; Streptophyta; Embryophyta; Tracheophyta; Spermatophyta; Magnoliopsida; eudicotyledons; Gunneridae; Pentapetalae; rosids; malvids; Brassicales; Brassicaceae; Camelineae; Arabidopsis`PUB4_ARATH^PUB4_ARATH^Q:1200-643,H:546-736^30.208%ID^E:1.07e-08^RecName: Full=U…	0.189149	1.57512	0.362868	0.333611	-0.123502	2.35137	2.44978	2.49657	1.64214	0.236234	0.518503	-0.989348	0.986375	0.145182	-4.05802	-4.05802	-4.05802
1	Nsylvestris_NODE_10058_length_2109_cov_233	T2FA_ARATH^T2FA_ARATH^Q:1999-395,H:1-543^56.584%ID^E:2.89e-164^RecName: Full=Transcription initiation factor IIF subunit alpha;^Eukaryota; Viridiplantae; Streptophyta; Embryophyta; Tracheophyta; Spermatophyta; Magnoliopsida; eudicotyledons; Gunneridae; Pentapetalae; rosids; malvids; Brassicales; Brassicaceae; Camelineae; Arabidopsis`T2FA_ARATH^T2FA_ARATH^Q:583-398,H:572-634^50.794%ID^E:6.77e-09^R…	0.351014	1.39228	0.11457	0.245867	-0.314021	1.54586	1.91495	2.00643	0.898082	0.59817	0.73814	0.778884	0.599449	0.534618	-4.41049	-3.24841	-3.7454
1	Nsylvestris_NODE_10061_length_2109_cov_201	ASPA_ARATH^ASPA_ARATH^Q:415-1578,H:88-474^43.544%ID^E:2.54e-94^RecName: Full=Aspartyl protease family protein At5g10770;^Eukaryota; Viridiplantae; Streptophyta; Embryophyta; Tracheophyta; Spermatophyta; Magnoliopsida; eudicotyledons; Gunneridae; Pentapetalae; rosids; malvids; Brassicales; Brassicaceae; Camelineae; Arabidopsis	1.37838	2.19786	0.944171	0.933781	0.97531	2.48178	1.90471	1.60096	1.46697	-0.282096	1.34352	0.762473	0.8914	-0.0144405	-5.57892	-4.84195	-6.16388
1	Nsylvestris_NODE_10062_length_2109_cov_190	2A5K_ARATH^2A5K_ARATH^Q:970-2109,H:1-382^71.503%ID^E:0^RecName: Full=Serine/threonine protein phosphatase 2A 57 kDa regulatory subunit B' kappa isoform;^Eukaryota; Viridiplantae; Streptophyta; Embryophyta; Tracheophyta; Spermatophyta; Magnoliopsida; eudicotyledons; Gunneridae; Pentapetalae; rosids; malvids; Brassicales; Brassicaceae; Camelineae; Arabidopsis	0.844992	1.3881	0.595882	0.49368	1.23754	1.81008	1.70255	2.13057	1.51906	0.452065	1.08748	0.629533	1.66031	0.543286	-5.36505	-5.36505	-5.36505
1	Nsylvestris_NODE_10063_length_2109_cov_108	RER1B_ARATH^RER1B_ARATH^Q:1192-1743,H:1-183^63.043%ID^E:8.7e-77^RecName: Full=Protein RER1B;^Eukaryota; Viridiplantae; Streptophyta; Embryophyta; Tracheophyta; Spermatophyta; Magnoliopsida; eudicotyledons; Gunneridae; Pentapetalae; rosids; malvids; Brassicales; Brassicaceae; Camelineae; Arabidopsis	0.493332	1.13349	0.844308	0.0912669	0.237363	2.04809	2.22246	1.76995	1.49172	-0.0638456	0.769567	0.0392946	1.23461	0.0247313	-3.38037	-4.47798	-4.47798
1	Nsylvestris_NODE_10065_length_2108_cov_204	P2C39_ARATH^P2C39_ARATH^Q:939-1781,H:1-289^77.855%ID^E:2.5e-148^RecName: Full=Probable protein phosphatase 2C 39;^Eukaryota; Viridiplantae; Streptophyta; Embryophyta; Tracheophyta; Spermatophyta; Magnoliopsida; eudicotyledons; Gunneridae; Pentapetalae; rosids; malvids; Brassicales; Brassicaceae; Camelineae; Arabidopsis	-0.266991	1.36913	0.348164	0.644578	0.340362	1.34708	1.44161	1.29701	0.56315	-0.345714	0.28027	0.321669	0.327909	-0.399622	-2.43271	-0.209613	-4.62629
1	Nsylvestris_NODE_10068_length_2108_cov_38	FK151_ARATH^FK151_ARATH^Q:1915-1805,H:25-61^75.676%ID^E:8.3e-12^RecName: Full=Peptidyl-prolyl cis-trans isomerase FKBP15-1;^Eukaryota; Viridiplantae; Streptophyta; Embryophyta; Tracheophyta; Spermatophyta; Magnoliopsida; eudicotyledons; Gunneridae; Pentapetalae; rosids; malvids; Brassicales; Brassicaceae; Camelineae; Arabidopsis	0.971675	1.81759	1.09051	1.75394	0.589265	2.53997	1.93006	1.68001	1.6576	-0.199087	1.35409	0.884626	0.987179	-0.527319	-6.59621	-4.92265	-5.01124
1	Nsylvestris_NODE_10073_length_2107_cov_48	RFA1B_ORYSJ^RFA1B_ORYSJ^Q:861-1472,H:362-566^25.714%ID^E:9.57e-11^RecName: Full=Replication protein A 70 kDa DNA-binding subunit B;^Eukaryota; Viridiplantae; Streptophyta; Embryophyta; Tracheophyta; Spermatophyta; Magnoliopsida; Liliopsida; Poales; Poaceae; BOP clade; Oryzoideae; Oryzeae; Oryzinae; Oryza; Oryza sativa	1.74235	2.63926	1.27669	2.2063	1.27738	3.37623	3.0742	2.37623	-1.11563	-1.53548	-1.53066	-0.793698	-0.530664	-3.11563	-3.11563	-3.11563	-3.11563
1	Nsylvestris_NODE_10074_length_2106_cov_233	PDI_DATGL^PDI_DATGL^Q:193-1629,H:22-502^55.394%ID^E:2.52e-178^RecName: Full=Protein disulfide-isomerase;^Eukaryota; Viridiplantae; Streptophyta; Embryophyta; Tracheophyta; Spermatophyta; Magnoliopsida; eudicotyledons; Gunneridae; Pentapetalae; rosids; fabids; Cucurbitales; Datiscaceae; Datisca	0.817747	1.70312	0.572538	0.670022	0.0319378	2.02872	1.63403	1.86778	1.31627	-0.399215	1.57445	0.386554	0.529356	0.387447	-4.34919	-4.03436	-4.7372
1	Nsylvestris_NODE_10075_length_2106_cov_117	SPS2_ORYSJ^SPS2_ORYSJ^Q:1047-1721,H:179-403^79.556%ID^E:1.33e-123^RecName: Full=Solanesyl-diphosphate synthase 2, chloroplastic {ECO:0000303|PubMed:20421194};^Eukaryota; Viridiplantae; Streptophyta; Embryophyta; Tracheophyta; Spermatophyta; Magnoliopsida; Liliopsida; Poales; Poaceae; BOP clade; Oryzoideae; Oryzeae; Oryzinae; Oryza; Oryza sativa	0.360855	1.43556	0.595634	0.574558	0.270156	1.89577	1.99493	2.50142	1.23687	0.66352	1.0432	0.460754	0.868488	0.485518	-6.08722	-5.09445	-3.20556
1	Nsylvestris_NODE_10076_length_2102_cov_116	POLX_TOBAC^POLX_TOBAC^Q:992-6,H:232-555^32.733%ID^E:3.7e-86^RecName: Full=Retrovirus-related Pol polyprotein from transposon TNT 1-94;^Eukaryota; Viridiplantae; Streptophyta; Embryophyta; Tracheophyta; Spermatophyta; Magnoliopsida; eudicotyledons; Gunneridae; Pentapetalae; asterids; lamiids; Solanales; Solanaceae; Nicotianoideae; Nicotianeae; Nicotiana`POLX_TOBAC^POLX_TOBAC^Q:1675-986,H:1-234^36.…	0.108214	-0.527154	-2.11212	0.446151	-2.11212	2.13581	3.79477	4.19057	1.0658	-2.11212	-0.186117	-1.11212	0.296596	-2.11212	0.759727	-2.11212	-0.411676
1	Nsylvestris_NODE_10078_length_2106_cov_50	.	0.0863288	1.39445	-0.0906983	0.0159395	0.24522	0.781474	1.4489	1.43548	0.512913	-1.06873	-0.176706	0.2486	-0.270805	0.0159395	-0.897277	-1.67955	-2.00148
1	Nsylvestris_NODE_10079_length_2106_cov_40	MDLL_ARATH^MDLL_ARATH^Q:206-1765,H:33-552^70.577%ID^E:0^RecName: Full=(R)-mandelonitrile lyase-like;^Eukaryota; Viridiplantae; Streptophyta; Embryophyta; Tracheophyta; Spermatophyta; Magnoliopsida; eudicotyledons; Gunneridae; Pentapetalae; rosids; malvids; Brassicales; Brassicaceae; Camelineae; Arabidopsis	0.452006	1.45201	0.326475	-1.13296	0.188972	1.39061	1.25936	-0.547994	1.86704	0.0369685	0.954506	0.188972	0.188972	-0.811028	-1.54799	-2.13296	-2.13296
1	Nsylvestris_NODE_10084_length_2105_cov_136	RBL2_ARATH^RBL2_ARATH^Q:1733-891,H:1-270^67.376%ID^E:6.49e-89^RecName: Full=RHOMBOID-like protein 2 {ECO:0000303|PubMed:16223493, ECO:0000303|PubMed:17181860};^Eukaryota; Viridiplantae; Streptophyta; Embryophyta; Tracheophyta; Spermatophyta; Magnoliopsida; eudicotyledons; Gunneridae; Pentapetalae; rosids; malvids; Brassicales; Brassicaceae; Camelineae; Arabidopsis	-0.0142522	0.619929	0.429061	0.60648	-0.000328746	2.45969	2.41612	2.13691	1.4473	1.16925	0.594471	1.66949	0.983219	0.126939	-5.75647	-4.14258	-4.74524
1	Nsylvestris_NODE_10085_length_2105_cov_74	.	-0.893345	0.454578	0.454578	0.454578	-0.445886	1.45458	1.20181	1.23219	2.40678	0.81835	1.55435	1.03988	1.72447	0.601419	-4.35278	-3.35278	-4.35278
1	Nsylvestris_NODE_10086_length_2105_cov_35	TPS3_SOLLC^TPS3_SOLLC^Q:2016-193,H:5-607^58.682%ID^E:0^RecName: Full=(-)-camphene/tricyclene synthase, chloroplastic;^Eukaryota; Viridiplantae; Streptophyta; Embryophyta; Tracheophyta; Spermatophyta; Magnoliopsida; eudicotyledons; Gunneridae; Pentapetalae; asterids; lamiids; Solanales; Solanaceae; Solanoideae; Solaneae; Solanum; Lycopersicon	-0.979216	-0.979216	-0.979216	0.605747	-0.979216	3.34271	4.51264	4.26871	-0.979216	-0.979216	-0.979216	-0.979216	-0.979216	-0.979216	-0.979216	-0.979216	-0.979216
1	Nsylvestris_NODE_10087_length_2105_cov_13	POT12_ARATH^POT12_ARATH^Q:2104-89,H:154-826^74.963%ID^E:0^RecName: Full=Putative potassium transporter 12;^Eukaryota; Viridiplantae; Streptophyta; Embryophyta; Tracheophyta; Spermatophyta; Magnoliopsida; eudicotyledons; Gunneridae; Pentapetalae; rosids; malvids; Brassicales; Brassicaceae; Camelineae; Arabidopsis	-0.543454	-0.543454	-0.865382	1.04151	-0.0580267	1.04151	1.13462	0.59405	1.30454	-0.280419	-0.25185	1.64051	1.65881	0.138221	-1.86538	-1.28042	-2.86538
1	Nsylvestris_NODE_10088_length_2104_cov_219	.	0.0720524	0.896348	-0.305607	-0.669777	-0.0245489	1.40388	1.86673	0.974168	2.60574	1.11923	1.80834	0.985436	1.63111	0.936612	-4.85208	-4.7306	-3.71703
1	Nsylvestris_NODE_1009_length_4937_cov_50	TF26_SCHPO^TF26_SCHPO^Q:2473-884,H:748-1260^30.237%ID^E:1.68e-108^RecName: Full=Transposon Tf2-6 polyprotein;^Eukaryota; Fungi; Dikarya; Ascomycota; Taphrinomycotina; Schizosaccharomycetes; Schizosaccharomycetales; Schizosaccharomycetaceae; Schizosaccharomyces`TF26_SCHPO^TF26_SCHPO^Q:3212-2517,H:494-725^33.621%ID^E:1.68e-108^RecName: Full=Transposon Tf2-6 polyprotein;^Eukaryota; Fungi; Dikarya; A…	-0.728596	1.06906	-0.674148	-1.90172	0.505481	1.84709	1.54824	1.36564	2.05083	0.619287	1.2353	0.185674	0.780222	0.477855	-3.42904	-2.84407	-2.10711
1	Nsylvestris_NODE_10090_length_2104_cov_151	RS13_SOYBN^RS13_SOYBN^Q:1264-812,H:1-151^96.026%ID^E:3.73e-96^RecName: Full=40S ribosomal protein S13;^Eukaryota; Viridiplantae; Streptophyta; Embryophyta; Tracheophyta; Spermatophyta; Magnoliopsida; eudicotyledons; Gunneridae; Pentapetalae; rosids; fabids; Fabales; Fabaceae; Papilionoideae; 50 kb inversion clade; NPAAA clade; indigoferoid/millettioid clade; Phaseoleae; Glycine; Soja	0.0533532	0.806648	0.0645804	0.952487	0.138666	0.799988	0.962651	0.863749	0.691338	-0.0930017	0.28582	0.133187	0.348381	-0.452125	-2.00497	-1.72842	-1.82233
1	Nsylvestris_NODE_10092_length_2104_cov_46	CCX1_ARATH^CCX1_ARATH^Q:1901-324,H:42-563^53.409%ID^E:1.24e-150^RecName: Full=Cation/calcium exchanger 1;^Eukaryota; Viridiplantae; Streptophyta; Embryophyta; Tracheophyta; Spermatophyta; Magnoliopsida; eudicotyledons; Gunneridae; Pentapetalae; rosids; malvids; Brassicales; Brassicaceae; Camelineae; Arabidopsis	1.22526	2.0397	0.689205	0.45474	1.22526	2.27417	2.22526	2.17463	0.952239	1.12216	1.92187	-3.63272	-3.63272	0.274167	-3.63272	-2.04776	-3.63272
1	Nsylvestris_NODE_10099_length_2103_cov_54	CLT3_ARATH^CLT3_ARATH^Q:1975-659,H:1-444^59.284%ID^E:1.2e-154^RecName: Full=Protein CLT3, chloroplastic {ECO:0000303|PubMed:20080670};^Eukaryota; Viridiplantae; Streptophyta; Embryophyta; Tracheophyta; Spermatophyta; Magnoliopsida; eudicotyledons; Gunneridae; Pentapetalae; rosids; malvids; Brassicales; Brassicaceae; Camelineae; Arabidopsis	0.0552125	1.14709	-0.0223429	0.811065	-0.134588	0.435728	0.727908	1.04984	0.142585	-0.380932	0.492877	-0.384047	-0.236937	0.10531	-1.63796	-0.209049	-1.96175
1	Nsylvestris_NODE_101_length_8430_cov_161	PKL_ARATH^PKL_ARATH^Q:8138-3939,H:1-1362^64.518%ID^E:0^RecName: Full=CHD3-type chromatin-remodeling factor PICKLE;^Eukaryota; Viridiplantae; Streptophyta; Embryophyta; Tracheophyta; Spermatophyta; Magnoliopsida; eudicotyledons; Gunneridae; Pentapetalae; rosids; malvids; Brassicales; Brassicaceae; Camelineae; Arabidopsis	0.797403	1.57318	0.501634	0.890714	0.925427	2.2865	1.86414	1.69811	1.63245	0.221924	0.994931	0.993972	1.22539	0.490836	-5.64522	-5.28727	-5.16411
1	Nsylvestris_NODE_1010_length_4933_cov_58	.	-0.188328	1.18467	0.0624284	0.54645	-0.0958347	1.24731	0.954951	0.700256	1.02517	-0.134687	0.68907	-0.25819	-0.0256654	-0.533476	-1.80922	-0.676436	-2.68847
1	Nsylvestris_NODE_10100_length_2102_cov_224	KPK2_ARATH^KPK2_ARATH^Q:1671-256,H:1-468^67.22%ID^E:0^RecName: Full=Serine/threonine-protein kinase AtPK2/AtPK19;^Eukaryota; Viridiplantae; Streptophyta; Embryophyta; Tracheophyta; Spermatophyta; Magnoliopsida; eudicotyledons; Gunneridae; Pentapetalae; rosids; malvids; Brassicales; Brassicaceae; Camelineae; Arabidopsis	-0.29751	0.763439	0.245287	0.389335	-0.349677	0.563228	0.686168	0.814815	0.551838	0.537462	0.2073	0.130588	0.405185	-0.176544	-1.40376	-1.39525	-1.67191
1	Nsylvestris_NODE_10106_length_2102_cov_125	TOM3_TOBAC^TOM3_TOBAC^Q:1491-610,H:1-294^99.66%ID^E:0^RecName: Full=Tobamovirus multiplication protein 3;^Eukaryota; Viridiplantae; Streptophyta; Embryophyta; Tracheophyta; Spermatophyta; Magnoliopsida; eudicotyledons; Gunneridae; Pentapetalae; asterids; lamiids; Solanales; Solanaceae; Nicotianoideae; Nicotianeae; Nicotiana	0.380652	1.19365	0.537593	1.0125	0.0453242	1.68747	1.04383	1.13629	1.07872	-0.230867	0.765552	0.448603	0.469155	-0.738776	-2.62967	-3.53756	-2.66246
1	Nsylvestris_NODE_10107_length_2102_cov_100	FUT12_ARATH^FUT12_ARATH^Q:1875-394,H:38-513^64.242%ID^E:0^RecName: Full=Putative fucosyltransferase-like protein;^Eukaryota; Viridiplantae; Streptophyta; Embryophyta; Tracheophyta; Spermatophyta; Magnoliopsida; eudicotyledons; Gunneridae; Pentapetalae; rosids; malvids; Brassicales; Brassicaceae; Camelineae; Arabidopsis	0.0556091	0.899618	-0.286169	0.132045	-0.016412	1.68632	1.56062	1.50461	1.30454	-0.111809	1.05435	0.378039	0.725594	-0.4409	-4.12475	-1.73305	-2.58825
1	Nsylvestris_NODE_1011_length_4932_cov_20	POLX_TOBAC^POLX_TOBAC^Q:1592-3541,H:2-659^41.679%ID^E:6.77e-160^RecName: Full=Retrovirus-related Pol polyprotein from transposon TNT 1-94;^Eukaryota; Viridiplantae; Streptophyta; Embryophyta; Tracheophyta; Spermatophyta; Magnoliopsida; eudicotyledons; Gunneridae; Pentapetalae; asterids; lamiids; Solanales; Solanaceae; Nicotianoideae; Nicotianeae; Nicotiana	-0.655411	0.702986	-0.702199	-2.45709	-0.504753	1.89058	1.91787	1.68267	1.99906	0.67199	1.51916	0.617162	1.13447	0.952474	-2.64973	-1.66215	-4.45709
1	Nsylvestris_NODE_10113_length_2101_cov_175	SCP50_ARATH^SCP50_ARATH^Q:1817-552,H:28-438^57.21%ID^E:1.22e-169^RecName: Full=Serine carboxypeptidase-like 50;^Eukaryota; Viridiplantae; Streptophyta; Embryophyta; Tracheophyta; Spermatophyta; Magnoliopsida; eudicotyledons; Gunneridae; Pentapetalae; rosids; malvids; Brassicales; Brassicaceae; Camelineae; Arabidopsis	1.12351	2.13306	0.945331	1.1831	-0.0769818	1.59243	1.96332	1.85925	1.00623	0.138107	0.669936	0.687844	0.493126	0.0169241	-5.50544	-4.48877	-3.74099
1	Nsylvestris_NODE_10119_length_2100_cov_204	RRA3_ARATH^RRA3_ARATH^Q:387-1661,H:1-428^73.256%ID^E:0^RecName: Full=Arabinosyltransferase RRA3 {ECO:0000305};^Eukaryota; Viridiplantae; Streptophyta; Embryophyta; Tracheophyta; Spermatophyta; Magnoliopsida; eudicotyledons; Gunneridae; Pentapetalae; rosids; malvids; Brassicales; Brassicaceae; Camelineae; Arabidopsis	0.258421	1.28137	0.0995357	0.589849	0.252327	1.33109	1.16185	1.15565	0.693842	-0.0208148	0.326345	0.354899	0.503606	-0.190819	-2.30864	-2.38728	-3.10123
1	Nsylvestris_NODE_1012_length_4931_cov_155	MP702_ARATH^MP702_ARATH^Q:4519-2708,H:4-623^75.478%ID^E:0^RecName: Full=Microtubule-associated protein 70-2;^Eukaryota; Viridiplantae; Streptophyta; Embryophyta; Tracheophyta; Spermatophyta; Magnoliopsida; eudicotyledons; Gunneridae; Pentapetalae; rosids; malvids; Brassicales; Brassicaceae; Camelineae; Arabidopsis	0.384488	1.39794	0.191445	0.404244	-0.262901	1.52495	1.36252	1.41902	0.503259	-0.0336219	0.391556	0.455207	0.135399	0.20624	-2.49033	-2.52222	-3.0672
1	Nsylvestris_NODE_10124_length_2100_cov_147	IDN2_ARATH^IDN2_ARATH^Q:1826-2038,H:45-116^58.333%ID^E:6.68e-17^RecName: Full=Protein INVOLVED IN DE NOVO 2 {ECO:0000303|PubMed:19915591};^Eukaryota; Viridiplantae; Streptophyta; Embryophyta; Tracheophyta; Spermatophyta; Magnoliopsida; eudicotyledons; Gunneridae; Pentapetalae; rosids; malvids; Brassicales; Brassicaceae; Camelineae; Arabidopsis`IDN2_ARATH^IDN2_ARATH^Q:815-1033,H:27-99^50.685%ID^E:…	0.46596	1.04761	-0.766659	0.488913	-0.336651	2.42861	1.82186	0.995903	1.6505	-0.0956431	1.21034	1.11635	1.90192	0.994472	-4.66002	-4.66002	-3.60344
1	Nsylvestris_NODE_10130_length_2099_cov_152	CDC2A_ANTMA^CDC2A_ANTMA^Q:1862-1209,H:1-218^97.706%ID^E:1.7e-150^RecName: Full=Cell division control protein 2 homolog A;^Eukaryota; Viridiplantae; Streptophyta; Embryophyta; Tracheophyta; Spermatophyta; Magnoliopsida; eudicotyledons; Gunneridae; Pentapetalae; asterids; lamiids; Lamiales; Plantaginaceae; Antirrhineae; Antirrhinum`CDC2A_ANTMA^CDC2A_ANTMA^Q:689-444,H:213-294^84.146%ID^E:7.62e-42^Re…	0.350777	0.986286	0.0773052	0.59045	-0.705052	1.15244	1.58016	1.30626	0.663747	-0.208613	0.744549	-0.0787949	-0.0273085	-0.38076	-2.31504	-2.09609	-1.64032
1	Nsylvestris_NODE_10133_length_2099_cov_26	PTR14_ARATH^PTR14_ARATH^Q:1984-161,H:1-614^69.692%ID^E:0^RecName: Full=Protein NRT1/ PTR FAMILY 7.3;^Eukaryota; Viridiplantae; Streptophyta; Embryophyta; Tracheophyta; Spermatophyta; Magnoliopsida; eudicotyledons; Gunneridae; Pentapetalae; rosids; malvids; Brassicales; Brassicaceae; Camelineae; Arabidopsis	-1.09483	-0.97846	-0.369448	1.88849	-3.00172	1.83117	2.12757	1.66958	2.29291	0.905175	0.779119	2.64919	3.50076	-0.194361	-4.00172	-4.00172	-4.00172
1	Nsylvestris_NODE_10134_length_2098_cov_228	E137_ARATH^E137_ARATH^Q:1875-892,H:20-347^71.037%ID^E:1.91e-162^RecName: Full=Glucan endo-1,3-beta-glucosidase 7;^Eukaryota; Viridiplantae; Streptophyta; Embryophyta; Tracheophyta; Spermatophyta; Magnoliopsida; eudicotyledons; Gunneridae; Pentapetalae; rosids; malvids; Brassicales; Brassicaceae; Camelineae; Arabidopsis`E137_ARATH^E137_ARATH^Q:622-479,H:390-434^66.667%ID^E:1.53e-10^RecName: Full=G…	0.644572	1.23999	0.220781	0.422894	-0.0384405	0.91679	0.574578	0.711501	0.323989	-0.74472	0.405809	-0.216093	0.190319	-0.12443	-1.43144	-1.8805	-1.2156
1	Nsylvestris_NODE_10137_length_2098_cov_131	.	-0.00725717	0.784938	-0.664369	0.220153	0.390078	1.30762	0.335631	0.0946224	1.11092	-0.320415	0.805116	0.279047	0.220153	-0.235526	-0.557454	-0.720376	-3.04288
1	Nsylvestris_NODE_10140_length_2097_cov_177	FBL45_ARATH^FBL45_ARATH^Q:2097-787,H:28-424^29.464%ID^E:1.87e-32^RecName: Full=Putative F-box/LRR-repeat protein At3g18150;^Eukaryota; Viridiplantae; Streptophyta; Embryophyta; Tracheophyta; Spermatophyta; Magnoliopsida; eudicotyledons; Gunneridae; Pentapetalae; rosids; malvids; Brassicales; Brassicaceae; Camelineae; Arabidopsis	1.7277	2.36634	1.80787	2.28953	0.990734	1.76834	1.38083	0.953151	1.15393	0.124485	-0.327763	-0.00857921	-0.0796554	-0.942152	-4.40158	-4.40158	-4.40158
1	Nsylvestris_NODE_10141_length_2097_cov_167	TMN3_ARATH^TMN3_ARATH^Q:1928-192,H:14-592^85.838%ID^E:0^RecName: Full=Transmembrane 9 superfamily member 3 {ECO:0000305};^Eukaryota; Viridiplantae; Streptophyta; Embryophyta; Tracheophyta; Spermatophyta; Magnoliopsida; eudicotyledons; Gunneridae; Pentapetalae; rosids; malvids; Brassicales; Brassicaceae; Camelineae; Arabidopsis	0.518073	1.64989	0.526064	0.285296	-0.246455	0.368077	0.956445	0.937482	0.263297	-0.170775	0.365321	0.478243	-0.0506892	0.21534	-1.72453	-2.06109	-2.30999
1	Nsylvestris_NODE_10143_length_2097_cov_65	GH310_ARATH^GH310_ARATH^Q:1867-110,H:10-590^68.707%ID^E:0^RecName: Full=Indole-3-acetic acid-amido synthetase GH3.10 {ECO:0000305};^Eukaryota; Viridiplantae; Streptophyta; Embryophyta; Tracheophyta; Spermatophyta; Magnoliopsida; eudicotyledons; Gunneridae; Pentapetalae; rosids; malvids; Brassicales; Brassicaceae; Camelineae; Arabidopsis	0.815151	0.87105	-0.113679	-1.63496	0.0907454	0.416435	0.638828	1.55939	1.22242	-0.168527	1.09713	0.378059	0.581007	0.247637	-1.85238	-2.30459	-1.84372
1	Nsylvestris_NODE_10145_length_2096_cov_112	AIGLD_ARATH^AIGLD_ARATH^Q:1925-1659,H:6-94^61.798%ID^E:3.3e-28^RecName: Full=AIG2-like protein D {ECO:0000305};^Eukaryota; Viridiplantae; Streptophyta; Embryophyta; Tracheophyta; Spermatophyta; Magnoliopsida; eudicotyledons; Gunneridae; Pentapetalae; rosids; malvids; Brassicales; Brassicaceae; Camelineae; Arabidopsis`AIGLD_ARATH^AIGLD_ARATH^Q:1152-964,H:90-151^60.317%ID^E:1.11e-14^RecName: Full=A…	1.4506	1.938	1.25907	1.62941	0.781168	1.43854	2.26645	1.54406	1.17771	0.32375	1.01632	0.580512	1.2434	0.0912518	-6.77985	-4.19489	-5.7655
1	Nsylvestris_NODE_10146_length_2096_cov_86	SRO5_ARATH^SRO5_ARATH^Q:837-1652,H:41-306^45.455%ID^E:2.99e-73^RecName: Full=Probable inactive poly [ADP-ribose] polymerase SRO5;^Eukaryota; Viridiplantae; Streptophyta; Embryophyta; Tracheophyta; Spermatophyta; Magnoliopsida; eudicotyledons; Gunneridae; Pentapetalae; rosids; malvids; Brassicales; Brassicaceae; Camelineae; Arabidopsis	0.119743	0.834341	0.829147	0.991183	-0.211463	1.3579	0.921804	0.762948	0.461364	-1.77197	-0.668047	0.534781	0.71625	-0.211463	-1.76786	-1.19113	-1.70754
1	Nsylvestris_NODE_1015_length_4928_cov_41	GAT27_ARATH^GAT27_ARATH^Q:4442-4555,H:16-53^78.947%ID^E:2.3e-11^RecName: Full=GATA transcription factor 27;^Eukaryota; Viridiplantae; Streptophyta; Embryophyta; Tracheophyta; Spermatophyta; Magnoliopsida; eudicotyledons; Gunneridae; Pentapetalae; rosids; malvids; Brassicales; Brassicaceae; Camelineae; Arabidopsis	1.01159	1.38585	-0.0948112	0.452677	0.664181	2.66418	2.03764	0.848605	0.546023	-0.548843	-1.79525	0.11164	1.20475	0.876043	-3.79525	-2.77377	-2.79525
1	Nsylvestris_NODE_10152_length_2095_cov_102	PITC_DICDI^PITC_DICDI^Q:985-275,H:46-289^30.081%ID^E:5.08e-32^RecName: Full=Phosphatidylinositol transfer protein 3;^Eukaryota; Amoebozoa; Mycetozoa; Dictyostelids; Dictyosteliales; Dictyosteliaceae; Dictyostelium	-0.261609	-0.416271	0.637722	1.14877	0.0202289	1.95644	2.4461	1.59951	2.41372	1.20175	1.1536	1.12347	1.95871	0.718019	-5.23338	-5.23338	-5.23338
1	Nsylvestris_NODE_10153_length_2095_cov_56	NAT7_ARATH^NAT7_ARATH^Q:279-1847,H:16-538^62.141%ID^E:0^RecName: Full=Nucleobase-ascorbate transporter 7;^Eukaryota; Viridiplantae; Streptophyta; Embryophyta; Tracheophyta; Spermatophyta; Magnoliopsida; eudicotyledons; Gunneridae; Pentapetalae; rosids; malvids; Brassicales; Brassicaceae; Camelineae; Arabidopsis	-0.492947	0.439939	0.135084	0.571183	-0.952379	1.69148	1.57118	2.55542	0.295549	-0.782454	0.295549	0.135084	-0.630451	-0.145024	-1.36742	-1.36742	-1.95238
1	Nsylvestris_NODE_1016_length_4927_cov_143	UGT43_PUEML^UGT43_PUEML^Q:4769-3420,H:6-447^52.308%ID^E:7.01e-154^RecName: Full=UDP-glycosyltransferase 43 {ECO:0000303|PubMed:27066037};^Eukaryota; Viridiplantae; Streptophyta; Embryophyta; Tracheophyta; Spermatophyta; Magnoliopsida; eudicotyledons; Gunneridae; Pentapetalae; rosids; fabids; Fabales; Fabaceae; Papilionoideae; 50 kb inversion clade; NPAAA clade; indigoferoid/millettioid clade; Pha…	-0.0893876	0.790853	-0.404367	-0.0827726	-0.331142	1.82764	1.87323	1.68404	0.726444	-0.316286	0.714694	0.406756	0.678254	0.317001	-1.99809	-2.60968	-3.18719
1	Nsylvestris_NODE_10160_length_2093_cov_190	ACR8_ARATH^ACR8_ARATH^Q:1693-368,H:1-441^66.368%ID^E:0^RecName: Full=ACT domain-containing protein ACR8 {ECO:0000305};^Eukaryota; Viridiplantae; Streptophyta; Embryophyta; Tracheophyta; Spermatophyta; Magnoliopsida; eudicotyledons; Gunneridae; Pentapetalae; rosids; malvids; Brassicales; Brassicaceae; Camelineae; Arabidopsis	-0.437938	0.63974	-0.212957	-0.120421	-0.565244	1.80304	1.47579	1.65974	1.36627	-0.0596461	0.798468	0.831594	0.117789	-0.148432	-2.17357	-1.97675	-2.99746
1	Nsylvestris_NODE_10163_length_2093_cov_116	TFB1A_ARATH^TFB1A_ARATH^Q:79-201,H:263-303^73.171%ID^E:5.1e-44^RecName: Full=General transcription and DNA repair factor IIH subunit TFB1-1;^Eukaryota; Viridiplantae; Streptophyta; Embryophyta; Tracheophyta; Spermatophyta; Magnoliopsida; eudicotyledons; Gunneridae; Pentapetalae; rosids; malvids; Brassicales; Brassicaceae; Camelineae; Arabidopsis`TFB1A_ARATH^TFB1A_ARATH^Q:515-907,H:407-535^37.143%…	0.676585	1.34901	0.886038	0.630781	-0.235952	2.23117	1.34901	1.20015	1.78511	-0.622975	0.998513	1.10285	1.13602	0.48394	-4.32342	-4.32342	-4.32342
1	Nsylvestris_NODE_10165_length_2093_cov_51	.	0.0984367	1.71735	0.539009	0.0984367	0.876044	1.33548	2.17372	1.75051	1.84567	-0.00847847	0.750513	-0.538993	-0.38699	0.876044	-3.70892	-3.70892	-3.70892
1	Nsylvestris_NODE_10170_length_2092_cov_197	METL6_RAT^METL6_RAT^Q:3-671,H:42-267^47.577%ID^E:1.23e-61^RecName: Full=tRNA N(3)-methylcytidine methyltransferase METTL6 {ECO:0000305};^Eukaryota; Metazoa; Chordata; Craniata; Vertebrata; Euteleostomi; Mammalia; Eutheria; Euarchontoglires; Glires; Rodentia; Myomorpha; Muroidea; Muridae; Murinae; Rattus	0.789927	1.48393	0.0261108	0.413655	-0.497295	1.44806	1.56376	1.34063	1.63843	0.481658	0.941445	0.587507	0.454562	0.629341	-4.08945	-3.838	-3.37428
1	Nsylvestris_NODE_10173_length_2092_cov_55	.	0.23107	1.72367	0.559693	0.8492	0.0902076	1.58617	1.66279	1.12673	1.79031	1.12673	1.31244	1.72379	1.2431	0.559693	-5.19519	-5.19519	-5.19519
1	Nsylvestris_NODE_10174_length_2092_cov_23	ACA12_ARATH^ACA12_ARATH^Q:1255-149,H:636-1005^76.486%ID^E:0^RecName: Full=Calcium-transporting ATPase 12, plasma membrane-type;^Eukaryota; Viridiplantae; Streptophyta; Embryophyta; Tracheophyta; Spermatophyta; Magnoliopsida; eudicotyledons; Gunneridae; Pentapetalae; rosids; malvids; Brassicales; Brassicaceae; Camelineae; Arabidopsis`ACA12_ARATH^ACA12_ARATH^Q:2087-1614,H:125-282^70.253%ID^E:3.29e-…	0.540166	1.31777	-1.26719	0.540166	-1.26719	1.39045	2.61203	1.6397	0.858792	0.732811	0.0547389	-0.274421	1.19093	-1.26719	-2.26719	-2.26719	-2.26719
1	Nsylvestris_NODE_10177_length_2091_cov_176	BRTL3_ARATH^BRTL3_ARATH^Q:731-1705,H:97-425^75.076%ID^E:4.64e-164^RecName: Full=Probable mitochondrial adenine nucleotide transporter BTL3;^Eukaryota; Viridiplantae; Streptophyta; Embryophyta; Tracheophyta; Spermatophyta; Magnoliopsida; eudicotyledons; Gunneridae; Pentapetalae; rosids; malvids; Brassicales; Brassicaceae; Camelineae; Arabidopsis	0.450197	1.05644	0.524183	0.759466	-0.654583	1.20779	1.59503	1.40981	0.77497	0.47685	0.591335	0.283165	0.0583139	0.1022	-2.49327	-2.91882	-3.22307
1	Nsylvestris_NODE_10181_length_2091_cov_42	ALMTC_ARATH^ALMTC_ARATH^Q:150-1661,H:10-538^64.037%ID^E:0^RecName: Full=Aluminum-activated malate transporter 12;^Eukaryota; Viridiplantae; Streptophyta; Embryophyta; Tracheophyta; Spermatophyta; Magnoliopsida; eudicotyledons; Gunneridae; Pentapetalae; rosids; malvids; Brassicales; Brassicaceae; Camelineae; Arabidopsis	2.36156	1.77071	0.4604	-0.995793	1.30795	1.25026	-0.223671	1.30684	1.56988	-1.24304	1.52145	0.606404	0.709902	-0.222069	-3.3936	-3.3936	-3.3936
1	Nsylvestris_NODE_10185_length_2090_cov_115	MED21_ARATH^MED21_ARATH^Q:1101-1514,H:1-139^77.698%ID^E:6.98e-57^RecName: Full=Mediator of RNA polymerase II transcription subunit 21;^Eukaryota; Viridiplantae; Streptophyta; Embryophyta; Tracheophyta; Spermatophyta; Magnoliopsida; eudicotyledons; Gunneridae; Pentapetalae; rosids; malvids; Brassicales; Brassicaceae; Camelineae; Arabidopsis	0.355724	1.41925	0.416606	0.569205	0.0437799	1.47566	1.66377	1.63715	0.673223	0.189293	0.435362	-0.214801	1.178	0.583142	-3.44818	-3.04647	-3.93072
1	Nsylvestris_NODE_10186_length_2090_cov_113	OP24A_ARATH^OP24A_ARATH^Q:143-781,H:1-213^66.667%ID^E:4.18e-96^RecName: Full=Outer envelope pore protein 24A, chloroplastic;^Eukaryota; Viridiplantae; Streptophyta; Embryophyta; Tracheophyta; Spermatophyta; Magnoliopsida; eudicotyledons; Gunneridae; Pentapetalae; rosids; malvids; Brassicales; Brassicaceae; Camelineae; Arabidopsis	1.18428	1.78276	0.66995	1.51125	0.287618	1.99734	2.18122	2.06312	1.22686	0.332737	0.953501	-0.0320206	0.40603	0.725892	-6.1216	-5.0581	-4.11082
1	Nsylvestris_NODE_10187_length_2090_cov_110	QQT1_ARATH^QQT1_ARATH^Q:936-334,H:98-298^79.104%ID^E:2.82e-91^RecName: Full=GPN-loop GTPase QQT1 {ECO:0000305};^Eukaryota; Viridiplantae; Streptophyta; Embryophyta; Tracheophyta; Spermatophyta; Magnoliopsida; eudicotyledons; Gunneridae; Pentapetalae; rosids; malvids; Brassicales; Brassicaceae; Camelineae; Arabidopsis`QQT1_ARATH^QQT1_ARATH^Q:2089-1829,H:14-100^86.207%ID^E:3.97e-44^RecName: Full=GP…	0.5463	0.824193	0.286565	0.497008	-0.479651	1.85883	1.31195	1.73235	1.26977	-0.167125	0.0667631	-0.518199	0.349356	-1.15739	-1.44211	-1.85607	-3.12254
1	Nsylvestris_NODE_10190_length_2089_cov_224	PME_PETIN^PME_PETIN^Q:1360-218,H:1-374^69.634%ID^E:0^RecName: Full=Pectinesterase;^Eukaryota; Viridiplantae; Streptophyta; Embryophyta; Tracheophyta; Spermatophyta; Magnoliopsida; eudicotyledons; Gunneridae; Pentapetalae; asterids; lamiids; Solanales; Solanaceae; Petunioideae; Petunia	1.37835	4.83832	2.05187	0.00825337	2.66519	0.373189	-5.62073	-0.443504	2.20181	-2.42981	1.28157	1.40653	0.303868	-0.859351	-0.647295	-5.49459	-1.01367
1	Nsylvestris_NODE_10192_length_2089_cov_210	YZ37_SYNY3^YZ37_SYNY3^Q:797-1699,H:3-294^30.592%ID^E:4.01e-31^RecName: Full=Uncharacterized sugar kinase slr0537;^Bacteria; Cyanobacteria; Synechococcales; Merismopediaceae; Synechocystis	0.591899	1.78065	1.22392	0.933946	1.0641	1.79324	1.92526	2.04128	1.06022	0.372296	1.20601	0.430718	0.6387	0.633259	-5.83642	-5.85698	-4.0021
1	Nsylvestris_NODE_10195_length_2089_cov_112	ARG7_VIGRR^ARG7_VIGRR^Q:262-444,H:24-85^56.452%ID^E:2.89e-15^RecName: Full=Indole-3-acetic acid-induced protein ARG7;^Eukaryota; Viridiplantae; Streptophyta; Embryophyta; Tracheophyta; Spermatophyta; Magnoliopsida; eudicotyledons; Gunneridae; Pentapetalae; rosids; fabids; Fabales; Fabaceae; Papilionoideae; 50 kb inversion clade; NPAAA clade; indigoferoid/millettioid clade; Phaseoleae; Vigna	0.863234	1.31053	0.954154	1.17844	-0.137649	1.08024	1.63966	0.975268	0.779976	-1.50548	0.291523	0.673444	-0.0250045	-0.16769	-2.96188	-2.17613	-2.77263
1	Nsylvestris_NODE_102_length_8418_cov_231	.	0.00840824	1.25339	-0.151636	-0.420824	-0.531461	1.23996	0.717331	1.45255	1.15024	-0.478884	0.470777	0.206455	0.626396	0.393918	-1.93131	-1.90385	-2.10145
1	Nsylvestris_NODE_10200_length_2088_cov_183	.	0.572393	1.45391	0.268319	0.720367	0.485467	2.60019	2.84251	1.45009	1.41251	0.578822	1.56721	0.135052	1.03402	0.438458	-5.63472	-4.28989	-5.63472
1	Nsylvestris_NODE_10202_length_2087_cov_234	CDS1_SOLTU^CDS1_SOLTU^Q:1911-640,H:1-424^97.877%ID^E:0^RecName: Full=Phosphatidate cytidylyltransferase 1 {ECO:0000303|PubMed:9085581};^Eukaryota; Viridiplantae; Streptophyta; Embryophyta; Tracheophyta; Spermatophyta; Magnoliopsida; eudicotyledons; Gunneridae; Pentapetalae; asterids; lamiids; Solanales; Solanaceae; Solanoideae; Solaneae; Solanum	-0.0970807	0.449096	-0.373646	0.328944	-0.661773	1.31796	1.21553	1.37075	0.393992	-0.0588289	0.435249	0.104374	0.372867	-0.149892	-1.70801	-1.10173	-1.83779
1	Nsylvestris_NODE_10206_length_2087_cov_189	SKI16_ARATH^SKI16_ARATH^Q:64-1365,H:10-436^61.187%ID^E:5.49e-177^RecName: Full=F-box protein SKIP16;^Eukaryota; Viridiplantae; Streptophyta; Embryophyta; Tracheophyta; Spermatophyta; Magnoliopsida; eudicotyledons; Gunneridae; Pentapetalae; rosids; malvids; Brassicales; Brassicaceae; Camelineae; Arabidopsis	0.607081	1.49579	0.727002	0.970377	-0.0972478	1.54022	1.41453	1.27719	0.573311	-0.0575204	0.154905	0.0953972	0.331904	-0.28531	-3.14198	-2.64569	-2.95996
1	Nsylvestris_NODE_10207_length_2087_cov_165	PTR6_ARATH^PTR6_ARATH^Q:184-1857,H:11-574^49.027%ID^E:0^RecName: Full=Protein NRT1/ PTR FAMILY 1.2;^Eukaryota; Viridiplantae; Streptophyta; Embryophyta; Tracheophyta; Spermatophyta; Magnoliopsida; eudicotyledons; Gunneridae; Pentapetalae; rosids; malvids; Brassicales; Brassicaceae; Camelineae; Arabidopsis	0.0230631	0.687391	0.1807	0.59781	-0.484652	0.8707	1.11867	1.46974	-0.329347	0.28007	-0.106849	0.171545	-0.0194308	0.0284896	-2.17501	-0.475635	-1.83725
1	Nsylvestris_NODE_1021_length_4922_cov_89	HFB2A_ARATH^HFB2A_ARATH^Q:3622-4590,H:1-299^43.417%ID^E:2.24e-72^RecName: Full=Heat stress transcription factor B-2a;^Eukaryota; Viridiplantae; Streptophyta; Embryophyta; Tracheophyta; Spermatophyta; Magnoliopsida; eudicotyledons; Gunneridae; Pentapetalae; rosids; malvids; Brassicales; Brassicaceae; Camelineae; Arabidopsis	0.788434	1.62438	1.37089	1.98559	0.71342	1.66178	1.42737	1.39497	1.16369	0.0595108	0.805712	1.33361	0.696846	0.259088	-6.47413	-4.14644	-4.66472
1	Nsylvestris_NODE_10210_length_2087_cov_96	.	0.0883909	1.47295	-0.50827	0.695795	-0.217351	1.52553	2.74793	1.57529	1.82522	0.532098	0.524013	0.692192	1.34255	0.625743	-4.30736	-4.30736	-4.30736
1	Nsylvestris_NODE_10213_length_2087_cov_45	.	1.17543	1.24943	1.68239	1.45106	-0.0725	3.43529	3.52741	3.26735	0.9275	-3.0725	-0.265145	-3.0725	-0.265145	-0.750572	-3.0725	-3.0725	-3.0725
1	Nsylvestris_NODE_10214_length_2087_cov_22	.	-0.837086	1.35637	0.27799	-1.30697	-0.08458	1.27799	1.96853	1.5127	1.78811	0.80906	1.38307	1.10807	0.862953	0.559606	-3.89193	-3.89193	-2.89193
1	Nsylvestris_NODE_10216_length_2086_cov_224	ASOL_TOBAC^ASOL_TOBAC^Q:1958-285,H:1-554^82.437%ID^E:0^RecName: Full=L-ascorbate oxidase homolog;^Eukaryota; Viridiplantae; Streptophyta; Embryophyta; Tracheophyta; Spermatophyta; Magnoliopsida; eudicotyledons; Gunneridae; Pentapetalae; asterids; lamiids; Solanales; Solanaceae; Nicotianoideae; Nicotianeae; Nicotiana	2.50631	5.8393	2.75974	0.795535	2.59225	0.914281	-3.20266	-0.445226	-0.179788	-3.63833	-1.61529	1.80961	-2.79033	-1.00922	-0.709759	-2.9572	-0.669224
1	Nsylvestris_NODE_10217_length_2086_cov_222	PDI14_ARATH^PDI14_ARATH^Q:1764-391,H:98-555^70.961%ID^E:0^RecName: Full=Protein disulfide isomerase-like 1-4;^Eukaryota; Viridiplantae; Streptophyta; Embryophyta; Tracheophyta; Spermatophyta; Magnoliopsida; eudicotyledons; Gunneridae; Pentapetalae; rosids; malvids; Brassicales; Brassicaceae; Camelineae; Arabidopsis`PDI14_ARATH^PDI14_ARATH^Q:756-415,H:96-205^42.241%ID^E:7.38e-15^RecName: Full=Prot…	1.2845	2.1892	1.17206	1.37378	0.603573	2.53678	2.38362	2.68277	1.463	0.588231	0.958651	-2.00001	-2.19214	-2.60214	-3.96236	-3.4392	-3.04032
1	Nsylvestris_NODE_10218_length_2086_cov_222	GLYP3_ARATH^GLYP3_ARATH^Q:184-1758,H:1-529^77.589%ID^E:0^RecName: Full=Serine hydroxymethyltransferase 3, chloroplastic;^Eukaryota; Viridiplantae; Streptophyta; Embryophyta; Tracheophyta; Spermatophyta; Magnoliopsida; eudicotyledons; Gunneridae; Pentapetalae; rosids; malvids; Brassicales; Brassicaceae; Camelineae; Arabidopsis	0.858935	1.69058	0.523176	1.10573	0.295555	1.77278	1.54049	1.71234	1.89303	1.04638	1.54127	1.34297	1.30459	0.875841	-5.83455	-5.83455	-5.83455
1	Nsylvestris_NODE_10221_length_2086_cov_114	AG11C_VITVI^AG11C_VITVI^Q:1005-313,H:1-222^68.398%ID^E:4.63e-102^RecName: Full=Agamous-like MADS-box protein AGL11 {ECO:0000305};^Eukaryota; Viridiplantae; Streptophyta; Embryophyta; Tracheophyta; Spermatophyta; Magnoliopsida; eudicotyledons; Gunneridae; Pentapetalae; rosids; Vitales; Vitaceae; Viteae; Vitis	0.733911	0.12984	-0.455123	0.792805	-1.45512	-0.133195	0.12984	-1.45512	-0.133195	-0.285198	0.352232	1.00431	0.451768	0.63234	0.792805	-0.647768	-0.455123
1	Nsylvestris_NODE_10222_length_2086_cov_92	GGLO3_ARATH^GGLO3_ARATH^Q:237-1895,H:24-577^66.547%ID^E:0^RecName: Full=L-gulonolactone oxidase 3 {ECO:0000303|PubMed:20622436};^Eukaryota; Viridiplantae; Streptophyta; Embryophyta; Tracheophyta; Spermatophyta; Magnoliopsida; eudicotyledons; Gunneridae; Pentapetalae; rosids; malvids; Brassicales; Brassicaceae; Camelineae; Arabidopsis	-0.382828	0.325247	-1.47356	-0.252929	-1.37288	1.85317	1.54992	1.62392	1.17886	0.315355	0.781539	0.836109	0.0363101	0.611524	-1.57368	-1.91933	-2.13675
1	Nsylvestris_NODE_10226_length_2085_cov_200	RECAC_ARATH^RECAC_ARATH^Q:269-1396,H:39-407^83.465%ID^E:0^RecName: Full=DNA repair protein recA homolog 1, chloroplastic;^Eukaryota; Viridiplantae; Streptophyta; Embryophyta; Tracheophyta; Spermatophyta; Magnoliopsida; eudicotyledons; Gunneridae; Pentapetalae; rosids; malvids; Brassicales; Brassicaceae; Camelineae; Arabidopsis	0.438774	1.17686	0.312354	0.443412	0.128414	1.59645	1.5129	1.48396	0.998905	-0.0144131	0.872831	0.576714	0.576277	0.671179	-3.66707	-3.25687	-3.85068
1	Nsylvestris_NODE_10227_length_2085_cov_108	LIG6_ARATH^LIG6_ARATH^Q:289-2076,H:60-608^53.344%ID^E:0^RecName: Full=DNA ligase 6 {ECO:0000303|PubMed:20584150};^Eukaryota; Viridiplantae; Streptophyta; Embryophyta; Tracheophyta; Spermatophyta; Magnoliopsida; eudicotyledons; Gunneridae; Pentapetalae; rosids; malvids; Brassicales; Brassicaceae; Camelineae; Arabidopsis	0.474861	1.55173	0.299118	0.363249	-0.457656	2.81582	2.60761	1.9047	1.42795	-0.243837	0.727212	0.594574	0.827462	-0.411852	-4.16031	-4.16031	-4.16031
1	Nsylvestris_NODE_10229_length_2085_cov_48	.	0.920848	1.0898	1.0851	0.615518	0.615084	0.759639	1.33975	0.316425	1.45636	-0.972488	0.139269	0.149503	0.0731323	-0.0338316	-1.26694	-2.8487	-3.43846
1	Nsylvestris_NODE_10230_length_2085_cov_17	PP231_ARATH^PP231_ARATH^Q:56-1432,H:199-653^54.466%ID^E:0^RecName: Full=Pentatricopeptide repeat-containing protein At3g14730;^Eukaryota; Viridiplantae; Streptophyta; Embryophyta; Tracheophyta; Spermatophyta; Magnoliopsida; eudicotyledons; Gunneridae; Pentapetalae; rosids; malvids; Brassicales; Brassicaceae; Camelineae; Arabidopsis`PP231_ARATH^PP231_ARATH^Q:56-1138,H:100-452^26.486%ID^E:1.02e-29^…	0.825294	1.75559	-1.56634	-0.396412	0.825981	1.60359	2.38786	1.24102	0.520277	0.520277	0.338629	-0.396412	-0.566337	0.0186258	-0.978972	-2.56634	-3.56634
1	Nsylvestris_NODE_10234_length_2084_cov_75	.	1.4606	2.73993	1.0252	1.59271	0.458002	1.33989	1.6076	2.16671	1.16099	0.571441	0.868005	0.583198	0.422568	0.421355	-5.47273	-5.47273	-5.47273
1	Nsylvestris_NODE_10236_length_2083_cov_215	ZFP1_ORYSJ^ZFP1_ORYSJ^Q:2017-440,H:12-521^31.636%ID^E:8.27e-46^RecName: Full=Probable E3 ubiquitin-protein ligase ZFP1 {ECO:0000305};^Eukaryota; Viridiplantae; Streptophyta; Embryophyta; Tracheophyta; Spermatophyta; Magnoliopsida; Liliopsida; Poales; Poaceae; BOP clade; Oryzoideae; Oryzeae; Oryzinae; Oryza; Oryza sativa	0.939556	1.40848	0.674698	0.894156	0.320824	2.26222	1.74137	1.99724	1.4056	0.363674	1.83463	0.844851	0.891509	0.549913	-5.72379	-4.68114	-5.72379
1	Nsylvestris_NODE_10239_length_2083_cov_69	RBP1A_ARATH^RBP1A_ARATH^Q:156-593,H:1-145^79.452%ID^E:2.51e-69^RecName: Full=Ran-binding protein 1 homolog a;^Eukaryota; Viridiplantae; Streptophyta; Embryophyta; Tracheophyta; Spermatophyta; Magnoliopsida; eudicotyledons; Gunneridae; Pentapetalae; rosids; malvids; Brassicales; Brassicaceae; Camelineae; Arabidopsis	1.16221	1.64677	1.12287	1.70547	0.197356	1.84812	1.84181	1.49273	1.56588	0.80878	1.0592	0.390199	0.533105	0.524931	-5.99108	-5.99108	-3.91726
1	Nsylvestris_NODE_10240_length_2083_cov_65	.	0.763039	1.72651	0.650564	0.650564	0.248466	1.41839	3.03357	1.8505	0.570394	-0.0994573	1.02607	0.689039	1.24847	-0.0994573	-4.55889	-4.55889	-4.55889
1	Nsylvestris_NODE_10241_length_2083_cov_41	.	0.492388	0.958052	-1.578	-0.314967	0.269996	1.52197	1.93296	1.30952	1.90743	-0.0925743	1.38547	0.685033	0.800511	-0.578001	-1.89993	-2.89993	-3.89993
1	Nsylvestris_NODE_10247_length_2081_cov_226	LAC4_ARATH^LAC4_ARATH^Q:1928-309,H:9-547^76.481%ID^E:0^RecName: Full=Laccase-4;^Eukaryota; Viridiplantae; Streptophyta; Embryophyta; Tracheophyta; Spermatophyta; Magnoliopsida; eudicotyledons; Gunneridae; Pentapetalae; rosids; malvids; Brassicales; Brassicaceae; Camelineae; Arabidopsis	0.982268	1.22023	0.470044	0.246019	0.364217	1.22925	0.644288	1.44223	0.577094	0.235787	0.103947	1.27473	1.1789	0.500624	-4.81347	-2.39042	-3.26574
1	Nsylvestris_NODE_10249_length_2081_cov_191	RIO2_DICDI^RIO2_DICDI^Q:213-1223,H:1-320^56.677%ID^E:1.02e-123^RecName: Full=Serine/threonine-protein kinase rio2;^Eukaryota; Amoebozoa; Mycetozoa; Dictyostelids; Dictyosteliales; Dictyosteliaceae; Dictyostelium	-0.0444349	0.916193	0.0295564	0.477103	-0.0266055	0.563433	0.846443	0.933434	0.920464	0.0432836	0.494202	0.122929	0.589411	-0.02241	-1.86493	-1.86265	-2.11542
1	Nsylvestris_NODE_10253_length_2080_cov_228	COPD_ARATH^COPD_ARATH^Q:1912-323,H:1-527^71.805%ID^E:0^RecName: Full=Coatomer subunit delta;^Eukaryota; Viridiplantae; Streptophyta; Embryophyta; Tracheophyta; Spermatophyta; Magnoliopsida; eudicotyledons; Gunneridae; Pentapetalae; rosids; malvids; Brassicales; Brassicaceae; Camelineae; Arabidopsis	0.0338538	0.947888	0.237559	0.64965	0.102684	1.38702	1.52614	1.50747	0.875104	0.145478	0.450023	0.329105	0.507005	-0.02407	-2.88947	-2.85309	-2.93234
1	Nsylvestris_NODE_10257_length_2080_cov_207	Y5382_ARATH^Y5382_ARATH^Q:1005-1598,H:1-194^54.04%ID^E:1.21e-66^RecName: Full=Uncharacterized protein At5g43822;^Eukaryota; Viridiplantae; Streptophyta; Embryophyta; Tracheophyta; Spermatophyta; Magnoliopsida; eudicotyledons; Gunneridae; Pentapetalae; rosids; malvids; Brassicales; Brassicaceae; Camelineae; Arabidopsis	0.168401	1.42656	0.151937	-0.017521	0.426262	0.64735	0.730416	0.351952	1.05082	-0.280836	0.473331	0.487368	0.587788	-0.406563	-2.18036	-1.33246	-2.28445
1	Nsylvestris_NODE_10259_length_2080_cov_196	SR34_ARATH^SR34_ARATH^Q:1984-1418,H:1-196^69.898%ID^E:1.11e-73^RecName: Full=Serine/arginine-rich-splicing factor SR34;^Eukaryota; Viridiplantae; Streptophyta; Embryophyta; Tracheophyta; Spermatophyta; Magnoliopsida; eudicotyledons; Gunneridae; Pentapetalae; rosids; malvids; Brassicales; Brassicaceae; Camelineae; Arabidopsis	0.438616	1.63729	0.149197	0.434452	-0.846904	1.11488	1.37562	2.25619	0.750346	0.150052	0.590825	0.495931	0.0582429	0.357237	-2.40136	-3.38826	-3.17236
1	Nsylvestris_NODE_10265_length_2079_cov_197	WAKLQ_ARATH^WAKLQ_ARATH^Q:2029-263,H:51-649^52.623%ID^E:0^RecName: Full=Wall-associated receptor kinase-like 20;^Eukaryota; Viridiplantae; Streptophyta; Embryophyta; Tracheophyta; Spermatophyta; Magnoliopsida; eudicotyledons; Gunneridae; Pentapetalae; rosids; malvids; Brassicales; Brassicaceae; Camelineae; Arabidopsis	0.732833	1.8128	1.6269	1.58384	0.353605	1.70197	1.61743	1.66926	0.854436	0.30908	1.07032	0.703903	0.576371	0.595257	-6.75356	-3.36537	-5.08908
1	Nsylvestris_NODE_1027_length_4901_cov_151	AB32G_ARATH^AB32G_ARATH^Q:412-4659,H:1-1420^68.614%ID^E:0^RecName: Full=ABC transporter G family member 32 {ECO:0000303|PubMed:18299247};^Eukaryota; Viridiplantae; Streptophyta; Embryophyta; Tracheophyta; Spermatophyta; Magnoliopsida; eudicotyledons; Gunneridae; Pentapetalae; rosids; malvids; Brassicales; Brassicaceae; Camelineae; Arabidopsis	-0.544966	0.0716315	0.085283	-0.186696	-0.327916	2.06484	1.54101	2.01668	0.988847	-0.73431	-0.235711	0.565569	1.43261	0.303703	-2.5298	-2.21131	-2.29948
1	Nsylvestris_NODE_10270_length_2079_cov_72	MD33A_ARATH^MD33A_ARATH^Q:119-1243,H:8-381^45.867%ID^E:7.73e-98^RecName: Full=Mediator of RNA polymerase II transcription subunit 33A;^Eukaryota; Viridiplantae; Streptophyta; Embryophyta; Tracheophyta; Spermatophyta; Magnoliopsida; eudicotyledons; Gunneridae; Pentapetalae; rosids; malvids; Brassicales; Brassicaceae; Camelineae; Arabidopsis	0.530967	1.32787	-0.843147	-1.0434	0.370503	2.47286	1.93294	1.56844	1.39699	0.190892	1.65982	1.14052	1.35729	-0.911668	-3.71696	-3.71696	-3.71696
1	Nsylvestris_NODE_10271_length_2079_cov_62	R1B17_SOLDE^R1B17_SOLDE^Q:1102-2067,H:364-681^30.581%ID^E:2.51e-33^RecName: Full=Putative late blight resistance protein homolog R1B-17;^Eukaryota; Viridiplantae; Streptophyta; Embryophyta; Tracheophyta; Spermatophyta; Magnoliopsida; eudicotyledons; Gunneridae; Pentapetalae; asterids; lamiids; Solanales; Solanaceae; Solanoideae; Solaneae; Solanum	0.631402	1.26942	0.107146	0.734729	-0.0737497	1.03092	0.414708	0.753027	0.851173	-0.947301	0.592771	0.263515	0.506485	1.15492	-1.74962	-1.26887	-4.27067
1	Nsylvestris_NODE_10273_length_2079_cov_39	ZAT4_ARATH^ZAT4_ARATH^Q:944-504,H:182-314^43.506%ID^E:1.71e-23^RecName: Full=Zinc finger protein ZAT4;^Eukaryota; Viridiplantae; Streptophyta; Embryophyta; Tracheophyta; Spermatophyta; Magnoliopsida; eudicotyledons; Gunneridae; Pentapetalae; rosids; malvids; Brassicales; Brassicaceae; Camelineae; Arabidopsis	-1.42708	-0.242658	0.53975	0.698448	0.841406	1.04422	0.398888	0.841406	1.28341	-0.494197	-0.0791594	-0.131627	0.15788	-1.30155	-0.799051	-0.0285333	-1.30155
1	Nsylvestris_NODE_10280_length_2078_cov_77	UGT8_CATRO^UGT8_CATRO^Q:990-1565,H:167-362^61.224%ID^E:2.38e-94^RecName: Full=7-deoxyloganetic acid glucosyltransferase;^Eukaryota; Viridiplantae; Streptophyta; Embryophyta; Tracheophyta; Spermatophyta; Magnoliopsida; eudicotyledons; Gunneridae; Pentapetalae; asterids; lamiids; Gentianales; Apocynaceae; Rauvolfioideae; Vinceae; Catharanthinae; Catharanthus`UGT8_CATRO^UGT8_CATRO^Q:1651-1869,H:410-…	1.24883	2.21712	1.24883	1.01067	-1.68977	1.89519	2.7365	1.89519	0.632159	-0.104807	0.679465	-0.104807	0.480156	0.679465	-4.27473	-4.27473	-4.27473
1	Nsylvestris_NODE_10281_length_2078_cov_10	.	1.07238	1.07238	-1.24955	-0.664583	-0.249545	2.07238	2.33542	2.55781	0.0723827	-2.24955	1.55781	1.33542	1.33542	-2.24955	-2.24955	-2.24955	-2.24955
1	Nsylvestris_NODE_10290_length_2077_cov_70	HFA6B_ARATH^HFA6B_ARATH^Q:402-1334,H:54-394^52.339%ID^E:1.4e-112^RecName: Full=Heat stress transcription factor A-6b;^Eukaryota; Viridiplantae; Streptophyta; Embryophyta; Tracheophyta; Spermatophyta; Magnoliopsida; eudicotyledons; Gunneridae; Pentapetalae; rosids; malvids; Brassicales; Brassicaceae; Camelineae; Arabidopsis	0.606849	0.935508	0.285764	-0.649006	-0.907082	2.84468	2.34721	1.3899	1.19087	-0.746913	1.31531	1.68615	0.634415	0.522335	-3.40104	-2.98036	-5.0746
1	Nsylvestris_NODE_10295_length_2076_cov_43	.	0.357831	1.00086	-0.379135	0.468862	0.299538	1.8225	2.2681	2.24489	1.45301	0.173406	0.961523	1.38866	0.759243	0.0387854	-4.28603	-4.28603	-4.28603
1	Nsylvestris_NODE_10296_length_2075_cov_218	Y5390_ARATH^Y5390_ARATH^Q:1779-241,H:1-523^66.224%ID^E:0^RecName: Full=Uncharacterized protein At5g03900, chloroplastic;^Eukaryota; Viridiplantae; Streptophyta; Embryophyta; Tracheophyta; Spermatophyta; Magnoliopsida; eudicotyledons; Gunneridae; Pentapetalae; rosids; malvids; Brassicales; Brassicaceae; Camelineae; Arabidopsis	-0.0347064	0.934283	0.0109962	-0.348387	-0.549315	0.968234	1.12212	1.06662	0.34274	-0.106444	0.626665	0.262416	0.347328	0.331333	-1.85581	-1.73179	-1.38629
1	Nsylvestris_NODE_10299_length_2075_cov_135	TOP3A_ORYSJ^TOP3A_ORYSJ^Q:153-1526,H:9-465^76.419%ID^E:0^RecName: Full=DNA topoisomerase 3-alpha;^Eukaryota; Viridiplantae; Streptophyta; Embryophyta; Tracheophyta; Spermatophyta; Magnoliopsida; Liliopsida; Poales; Poaceae; BOP clade; Oryzoideae; Oryzeae; Oryzinae; Oryza; Oryza sativa	0.642967	1.72895	0.275979	0.498355	-0.990032	0.694982	1.09185	0.892921	0.774877	-0.00870762	0.203381	0.284802	0.749851	-0.0514916	-2.50964	-2.08505	-2.19399
1	Nsylvestris_NODE_103_length_8371_cov_118	POLX_TOBAC^POLX_TOBAC^Q:5204-2541,H:8-898^44.053%ID^E:0^RecName: Full=Retrovirus-related Pol polyprotein from transposon TNT 1-94;^Eukaryota; Viridiplantae; Streptophyta; Embryophyta; Tracheophyta; Spermatophyta; Magnoliopsida; eudicotyledons; Gunneridae; Pentapetalae; asterids; lamiids; Solanales; Solanaceae; Nicotianoideae; Nicotianeae; Nicotiana`POLX_TOBAC^POLX_TOBAC^Q:2596-1259,H:876-1328^75.…	0.692515	1.91392	0.0904734	-0.372518	0.650587	2.4931	2.01492	1.37985	1.69923	-0.276898	1.45495	1.01422	1.88926	1.17281	-5.80046	-5.80046	-4.2155
1	Nsylvestris_NODE_10302_length_2075_cov_35	HIBC1_ARATH^HIBC1_ARATH^Q:1094-1011,H:165-192^96.429%ID^E:4.27e-08^RecName: Full=3-hydroxyisobutyryl-CoA hydrolase 1;^Eukaryota; Viridiplantae; Streptophyta; Embryophyta; Tracheophyta; Spermatophyta; Magnoliopsida; eudicotyledons; Gunneridae; Pentapetalae; rosids; malvids; Brassicales; Brassicaceae; Camelineae; Arabidopsis	0.402157	1.39105	-1.07496	0.517233	0.517233	1.26569	1.99189	-0.0641269	-0.252154	0.103798	0.255641	0.632711	0.254199	1.26283	-3.06773	-2.06773	-2.06773
1	Nsylvestris_NODE_10304_length_2075_cov_7	.	0.298107	0.179019	0.057099	0.68513	-1.0575	0.606656	1.24152	1.51271	1.48275	-0.0169016	0.405022	0.849386	0.194602	-0.40053	-0.81737	-1.81737	-3.40233
1	Nsylvestris_NODE_10314_length_2073_cov_143	ERD22_CAEEL^ERD22_CAEEL^Q:733-356,H:100-212^37.795%ID^E:3.37e-14^RecName: Full=ER lumen protein-retaining receptor erd-2.2 {ECO:0000305};^Eukaryota; Metazoa; Ecdysozoa; Nematoda; Chromadorea; Rhabditida; Rhabditina; Rhabditomorpha; Rhabditoidea; Rhabditidae; Peloderinae; Caenorhabditis	1.08044	1.90841	1.06994	1.15611	0.477276	2.26173	2.62679	2.55199	1.25088	0.227609	0.726716	0.420687	0.611851	0.385129	-6.28998	-4.17561	-6.28998
1	Nsylvestris_NODE_10319_length_2072_cov_220	SYMM_ARATH^SYMM_ARATH^Q:172-1929,H:1-581^75.973%ID^E:0^RecName: Full=Methionine--tRNA ligase, chloroplastic/mitochondrial {ECO:0000305};^Eukaryota; Viridiplantae; Streptophyta; Embryophyta; Tracheophyta; Spermatophyta; Magnoliopsida; eudicotyledons; Gunneridae; Pentapetalae; rosids; malvids; Brassicales; Brassicaceae; Camelineae; Arabidopsis	0.340697	1.50261	0.295766	0.162191	-0.692315	1.09356	1.04669	1.03987	1.01807	-0.0352807	0.598105	0.686056	0.31307	0.421903	-2.2783	-2.36689	-3.1458
1	Nsylvestris_NODE_1032_length_4896_cov_143	PPR41_ARATH^PPR41_ARATH^Q:4655-2511,H:88-823^44.052%ID^E:0^RecName: Full=Putative pentatricopeptide repeat-containing protein At1g13630;^Eukaryota; Viridiplantae; Streptophyta; Embryophyta; Tracheophyta; Spermatophyta; Magnoliopsida; eudicotyledons; Gunneridae; Pentapetalae; rosids; malvids; Brassicales; Brassicaceae; Camelineae; Arabidopsis	1.55561	2.52977	0.784294	1.07121	1.24814	2.83315	3.0491	2.67007	2.73055	1.92113	2.15473	-3.10116	-4.57625	-5.57625	-3.37148	-2.43383	-3.48878
1	Nsylvestris_NODE_1033_length_4895_cov_231	PHYE_IPONI^PHYE_IPONI^Q:2789-3,H:24-955^78.992%ID^E:0^RecName: Full=Phytochrome E;^Eukaryota; Viridiplantae; Streptophyta; Embryophyta; Tracheophyta; Spermatophyta; Magnoliopsida; eudicotyledons; Gunneridae; Pentapetalae; asterids; lamiids; Solanales; Convolvulaceae; Ipomoeeae; Ipomoea	0.0877927	0.869953	0.234118	0.0668732	-0.921278	0.801204	0.975446	1.2926	1.1556	0.516063	0.850333	-0.00554986	-0.140245	-0.546254	-1.68341	-1.42852	-2.12472
1	Nsylvestris_NODE_10332_length_2071_cov_17	.	-1.01056	0.49194	-0.0105607	-0.788168	-0.273595	1.5744	0.796794	1.15936	4.46517	2.5943	3.27484	-1.2736	0.211832	-0.425598	-3.59552	-3.59552	-3.59552
1	Nsylvestris_NODE_10335_length_2070_cov_225	.	0.359309	1.08947	0.568138	1.03599	0.811213	2.15347	2.21914	1.76116	1.21877	0.31632	0.788597	0.447907	0.825375	0.285412	-5.51694	-4.13123	-4.23211
1	Nsylvestris_NODE_10337_length_2070_cov_204	IMPA2_ARATH^IMPA2_ARATH^Q:170-1750,H:1-534^78.652%ID^E:0^RecName: Full=Importin subunit alpha-2 {ECO:0000305};^Eukaryota; Viridiplantae; Streptophyta; Embryophyta; Tracheophyta; Spermatophyta; Magnoliopsida; eudicotyledons; Gunneridae; Pentapetalae; rosids; malvids; Brassicales; Brassicaceae; Camelineae; Arabidopsis	-0.143628	0.993517	0.0260178	0.630744	-1.00246	0.543557	0.980176	1.51889	0.642523	0.446154	0.0612342	0.212624	-0.124012	-0.499528	-1.52612	-1.62191	-1.13777
1	Nsylvestris_NODE_10339_length_2070_cov_166	CARME_HUMAN^CARME_HUMAN^Q:1273-500,H:154-407^47.692%ID^E:9.87e-80^RecName: Full=Carnosine N-methyltransferase {ECO:0000303|PubMed:26001783, ECO:0000312|HGNC:HGNC:23435};^Eukaryota; Metazoa; Chordata; Craniata; Vertebrata; Euteleostomi; Mammalia; Eutheria; Euarchontoglires; Primates; Haplorrhini; Catarrhini; Hominidae; Homo	0.601102	1.51169	-0.0634669	0.0980292	-1.12661	0.719872	1.01664	0.391602	0.938907	-0.0230504	0.575899	-0.101588	0.55606	-0.139282	-2.15798	-1.172	-1.62584
1	Nsylvestris_NODE_10341_length_2070_cov_130	INVB_ARATH^INVB_ARATH^Q:1650-49,H:5-538^81.784%ID^E:0^RecName: Full=Probable alkaline/neutral invertase B {ECO:0000305};^Eukaryota; Viridiplantae; Streptophyta; Embryophyta; Tracheophyta; Spermatophyta; Magnoliopsida; eudicotyledons; Gunneridae; Pentapetalae; rosids; malvids; Brassicales; Brassicaceae; Camelineae; Arabidopsis	1.02968	1.59912	0.0470985	-0.161301	-0.465763	2.29682	2.16503	2.66165	1.56014	0.866141	1.06409	0.73722	1.07175	0.452781	-4.97483	-4.97483	-4.97483
1	Nsylvestris_NODE_10345_length_2070_cov_19	SD25_ARATH^SD25_ARATH^Q:2070-124,H:122-770^34.795%ID^E:1.74e-115^RecName: Full=G-type lectin S-receptor-like serine/threonine-protein kinase SD2-5;^Eukaryota; Viridiplantae; Streptophyta; Embryophyta; Tracheophyta; Spermatophyta; Magnoliopsida; eudicotyledons; Gunneridae; Pentapetalae; rosids; malvids; Brassicales; Brassicaceae; Camelineae; Arabidopsis	0.190775	0.974115	1.26878	1.70539	1.2303	0.735645	0.810058	-0.0722592	-1.65722	-2.97915	-0.171795	0.878831	0.108313	0.0208502	-1.17179	0.108313	-1.97915
1	Nsylvestris_NODE_10346_length_2070_cov_11	TI214_TOBAC^TI214_TOBAC^Q:1386-1556,H:1831-1900^60%ID^E:4.78e-15^RecName: Full=Protein TIC 214 {ECO:0000250|UniProtKB:P56785};^Eukaryota; Viridiplantae; Streptophyta; Embryophyta; Tracheophyta; Spermatophyta; Magnoliopsida; eudicotyledons; Gunneridae; Pentapetalae; asterids; lamiids; Solanales; Solanaceae; Nicotianoideae; Nicotianeae; Nicotiana	0.0726278	0.558055	-1.2493	0.338065	0.558055	2.27426	1.66239	2.27426	1.33446	-0.2493	-2.2493	-0.2493	0.7507	0.922227	-2.2493	-2.2493	-2.2493
1	Nsylvestris_NODE_10349_length_2069_cov_198	TBL23_ARATH^TBL23_ARATH^Q:518-1624,H:58-428^57.951%ID^E:2.48e-165^RecName: Full=Protein trichome birefringence-like 23;^Eukaryota; Viridiplantae; Streptophyta; Embryophyta; Tracheophyta; Spermatophyta; Magnoliopsida; eudicotyledons; Gunneridae; Pentapetalae; rosids; malvids; Brassicales; Brassicaceae; Camelineae; Arabidopsis	-0.136381	0.887165	0.20829	0.776893	0.290767	1.16879	1.13813	0.886755	1.46558	-0.0368565	1.0467	0.401107	0.205598	-0.349447	-2.48098	-2.49757	-2.97455
1	Nsylvestris_NODE_10350_length_2069_cov_113	.	0.501942	1.37871	0.010528	-0.183731	-0.619237	1.50106	-0.0241169	0.722001	0.280428	-0.380709	0.784838	0.729525	0.143275	-0.299713	-1.67945	-0.589512	-2.27585
1	Nsylvestris_NODE_10351_length_2069_cov_96	.	0.319594	0.687085	0.675132	0.791551	0.365247	1.89418	2.67825	1.08422	2.06135	1.28815	2.83837	0.793227	0.958552	1.22379	-6.21956	-5.21956	-6.21956
1	Nsylvestris_NODE_10352_length_2069_cov_48	INT4_ARATH^INT4_ARATH^Q:1873-140,H:2-582^73.585%ID^E:0^RecName: Full=Inositol transporter 4;^Eukaryota; Viridiplantae; Streptophyta; Embryophyta; Tracheophyta; Spermatophyta; Magnoliopsida; eudicotyledons; Gunneridae; Pentapetalae; rosids; malvids; Brassicales; Brassicaceae; Camelineae; Arabidopsis	1.30594	1.92092	1.7566	2.12467	0.974735	3.32277	3.39922	3.00718	2.30224	1.38616	2.31975	-3.97946	-3.97946	-3.92288	-3.97946	-3.97946	-3.97946
1	Nsylvestris_NODE_10353_length_2069_cov_47	.	-0.0413449	0.813566	-0.168662	-1.05644	0.330755	0.933898	0.775385	1.14301	0.468137	-1.21286	0.678073	1.47784	0.252827	0.928306	-2.28078	-1.63267	-1.40904
1	Nsylvestris_NODE_10355_length_2068_cov_215	C90B1_ARATH^C90B1_ARATH^Q:1783-416,H:33-509^70.747%ID^E:0^RecName: Full=Cytochrome P450 90B1;^Eukaryota; Viridiplantae; Streptophyta; Embryophyta; Tracheophyta; Spermatophyta; Magnoliopsida; eudicotyledons; Gunneridae; Pentapetalae; rosids; malvids; Brassicales; Brassicaceae; Camelineae; Arabidopsis	0.318364	0.938679	-0.298575	0.114213	-0.144775	2.07449	1.29472	0.701898	2.73914	1.94209	2.19449	0.208788	1.23779	-0.173123	-4.18619	-3.73314	-5.22884
1	Nsylvestris_NODE_10359_length_2068_cov_84	PP2A_TOBAC^PP2A_TOBAC^Q:1991-2068,H:137-162^92.308%ID^E:1.03e-06^RecName: Full=Serine/threonine-protein phosphatase PP2A catalytic subunit;^Eukaryota; Viridiplantae; Streptophyta; Embryophyta; Tracheophyta; Spermatophyta; Magnoliopsida; eudicotyledons; Gunneridae; Pentapetalae; asterids; lamiids; Solanales; Solanaceae; Nicotianoideae; Nicotianeae; Nicotiana	0.0746443	0.621373	-0.0408329	-0.625795	-0.45587	2.01806	2.50349	2.44029	2.0143	0.374205	1.05734	0.296402	1.03812	-0.438344	-3.6258	-3.6258	-3.6258
1	Nsylvestris_NODE_10360_length_2068_cov_73	IF4A9_TOBAC^IF4A9_TOBAC^Q:749-1816,H:59-412^76.966%ID^E:0^RecName: Full=Eukaryotic initiation factor 4A-9;^Eukaryota; Viridiplantae; Streptophyta; Embryophyta; Tracheophyta; Spermatophyta; Magnoliopsida; eudicotyledons; Gunneridae; Pentapetalae; asterids; lamiids; Solanales; Solanaceae; Nicotianoideae; Nicotianeae; Nicotiana	0.591916	1.51248	-0.526139	1.02755	-0.215439	1.51248	1.76184	2.19395	0.10649	-0.514999	0.784561	0.784561	-0.0455135	-1.04551	-3.21544	-2.49735	-2.21544
1	Nsylvestris_NODE_10361_length_2068_cov_58	.	-0.576027	-0.576027	0.317057	1.4746	0.745901	1.8834	2.48698	1.52351	1.3237	0.90202	0.579167	0.523508	1.88134	0.661012	-4.38338	-4.38338	-4.38338
1	Nsylvestris_NODE_10364_length_2067_cov_209	ILK1_ARATH^ILK1_ARATH^Q:349-1764,H:3-478^75.472%ID^E:0^RecName: Full=Integrin-linked protein kinase 1 {ECO:0000303|PubMed:27208244};^Eukaryota; Viridiplantae; Streptophyta; Embryophyta; Tracheophyta; Spermatophyta; Magnoliopsida; eudicotyledons; Gunneridae; Pentapetalae; rosids; malvids; Brassicales; Brassicaceae; Camelineae; Arabidopsis	0.47334	1.47323	0.949497	1.1545	0.171058	2.43345	2.21998	1.87528	0.732027	0.637526	0.333843	0.725518	1.13692	-0.0767009	-5.33041	-3.70724	-5.20182
1	Nsylvestris_NODE_1037_length_4891_cov_232	FLZ8_ARATH^FLZ8_ARATH^Q:3530-4456,H:1-265^43.226%ID^E:4.62e-57^RecName: Full=FCS-Like Zinc finger 8 {ECO:0000303|PubMed:24901469};^Eukaryota; Viridiplantae; Streptophyta; Embryophyta; Tracheophyta; Spermatophyta; Magnoliopsida; eudicotyledons; Gunneridae; Pentapetalae; rosids; malvids; Brassicales; Brassicaceae; Camelineae; Arabidopsis	0.0286634	0.871129	0.0113109	0.277725	-0.0174366	1.34051	1.79863	0.852926	1.01654	-0.477098	0.895262	0.183532	0.725161	-0.0732848	-2.44511	-2.37771	-2.61075
1	Nsylvestris_NODE_10371_length_2066_cov_176	DPH2_DANRE^DPH2_DANRE^Q:1990-470,H:16-490^32.549%ID^E:6.87e-86^RecName: Full=2-(3-amino-3-carboxypropyl)histidine synthase subunit 2 {ECO:0000305};^Eukaryota; Metazoa; Chordata; Craniata; Vertebrata; Euteleostomi; Actinopterygii; Neopterygii; Teleostei; Ostariophysi; Cypriniformes; Cyprinidae; Danio	0.564321	1.47603	0.683014	1.2501	0.298741	1.6678	1.83106	1.82512	0.707152	0.3849	0.70935	0.564464	0.481111	0.134109	-5.07939	-3.27204	-4.22585
1	Nsylvestris_NODE_1038_length_4891_cov_114	CCD4_ARATH^CCD4_ARATH^Q:1866-244,H:42-595^68.705%ID^E:0^RecName: Full=Probable carotenoid cleavage dioxygenase 4, chloroplastic;^Eukaryota; Viridiplantae; Streptophyta; Embryophyta; Tracheophyta; Spermatophyta; Magnoliopsida; eudicotyledons; Gunneridae; Pentapetalae; rosids; malvids; Brassicales; Brassicaceae; Camelineae; Arabidopsis	0.510303	1.53827	0.111252	0.262253	-0.136582	0.576224	0.828083	0.524546	0.506048	0.0541441	0.590362	0.489952	-0.125481	0.226556	-2.09919	-2.07461	-1.78213
1	Nsylvestris_NODE_10381_length_2064_cov_179	UVR8_ARATH^UVR8_ARATH^Q:1792-740,H:15-355^33.333%ID^E:6.04e-45^RecName: Full=Ultraviolet-B receptor UVR8;^Eukaryota; Viridiplantae; Streptophyta; Embryophyta; Tracheophyta; Spermatophyta; Magnoliopsida; eudicotyledons; Gunneridae; Pentapetalae; rosids; malvids; Brassicales; Brassicaceae; Camelineae; Arabidopsis`UVR8_ARATH^UVR8_ARATH^Q:1618-578,H:20-345^32.011%ID^E:4.97e-36^RecName: Full=Ultraviol…	0.240107	1.2331	-0.039216	0.390695	-0.818065	0.466928	1.70661	1.25662	0.386113	-0.115547	-0.00764328	0.280569	-0.0374997	0.252209	-1.72478	-1.39353	-2.07667
1	Nsylvestris_NODE_10384_length_2064_cov_119	.	0.290685	0.336115	0.294952	0.560163	-0.386931	2.29509	2.14694	2.20591	1.55353	0.48422	1.23062	1.03413	1.70732	0.312457	-4.31494	-4.37875	-5.37152
1	Nsylvestris_NODE_10387_length_2064_cov_44	R13L3_ARATH^R13L3_ARATH^Q:2059-626,H:361-841^34.8%ID^E:6.67e-52^RecName: Full=Putative disease resistance RPP13-like protein 3;^Eukaryota; Viridiplantae; Streptophyta; Embryophyta; Tracheophyta; Spermatophyta; Magnoliopsida; eudicotyledons; Gunneridae; Pentapetalae; rosids; malvids; Brassicales; Brassicaceae; Camelineae; Arabidopsis	0.26562	1.55406	0.0256221	-1.20653	-0.291209	1.50729	1.22745	1.79946	0.408951	-0.731912	0.719652	0.453006	0.616892	-0.369616	-3.28035	-0.46068	-2.2377
1	Nsylvestris_NODE_10388_length_2064_cov_12	.	-0.489894	1.59757	-0.904932	-0.904932	-2.48989	1.83203	1.21055	1.417	1.31746	1.59757	1.68003	0.680031	1.09507	-0.167966	-2.48989	-2.48989	-2.48989
1	Nsylvestris_NODE_10389_length_2063_cov_232	GLYM2_ARATH^GLYM2_ARATH^Q:175-1665,H:21-517^88.129%ID^E:0^RecName: Full=Serine hydroxymethyltransferase 2, mitochondrial;^Eukaryota; Viridiplantae; Streptophyta; Embryophyta; Tracheophyta; Spermatophyta; Magnoliopsida; eudicotyledons; Gunneridae; Pentapetalae; rosids; malvids; Brassicales; Brassicaceae; Camelineae; Arabidopsis	0.485689	1.1725	0.526099	0.82593	0.323689	1.71522	1.6379	1.5996	1.02114	-0.0596243	0.373461	0.579725	0.767774	0.0102253	-4.11994	-3.45732	-3.40208
1	Nsylvestris_NODE_1039_length_4890_cov_23	LORF2_HUMAN^LORF2_HUMAN^Q:2360-807,H:381-895^25.758%ID^E:5.99e-46^RecName: Full=LINE-1 retrotransposable element ORF2 protein;^Eukaryota; Metazoa; Chordata; Craniata; Vertebrata; Euteleostomi; Mammalia; Eutheria; Euarchontoglires; Primates; Haplorrhini; Catarrhini; Hominidae; Homo	-0.431169	0.749403	0.121372	-0.0161314	-0.431169	1.36238	1.08821	0.185502	2.55676	1.1855	2.01949	1.33437	1.98387	1.3058	-4.33806	-4.33806	-4.33806
1	Nsylvestris_NODE_10391_length_2063_cov_139	PP19_ARATH^PP19_ARATH^Q:488-1363,H:5-296^89.041%ID^E:0^RecName: Full=Serine/threonine-protein phosphatase PP1 isozyme 9 {ECO:0000305};^Eukaryota; Viridiplantae; Streptophyta; Embryophyta; Tracheophyta; Spermatophyta; Magnoliopsida; eudicotyledons; Gunneridae; Pentapetalae; rosids; malvids; Brassicales; Brassicaceae; Camelineae; Arabidopsis	0.415608	1.7401	0.662445	1.52493	0.487734	1.40273	2.23321	1.90007	1.25404	-0.011643	0.476433	0.476748	0.548652	-0.681957	-2.34868	-5.04021	-5.04021
1	Nsylvestris_NODE_10393_length_2063_cov_97	IKU1_ARATH^IKU1_ARATH^Q:696-1235,H:1-178^52.356%ID^E:5.83e-29^RecName: Full=Protein HAIKU1 {ECO:0000305};^Eukaryota; Viridiplantae; Streptophyta; Embryophyta; Tracheophyta; Spermatophyta; Magnoliopsida; eudicotyledons; Gunneridae; Pentapetalae; rosids; malvids; Brassicales; Brassicaceae; Camelineae; Arabidopsis`IKU1_ARATH^IKU1_ARATH^Q:1476-1637,H:341-401^67.213%ID^E:2.64e-07^RecName: Full=Protein…	0.565075	1.9004	0.900401	0.0944613	0.990789	1.87302	1.28045	2.13606	1.2139	-0.17327	0.463846	1.26641	0.661072	0.917878	-4.69683	-4.69683	-4.69683
1	Nsylvestris_NODE_10395_length_2063_cov_14	.	-0.421785	0.914498	0.646885	-0.0998573	-0.836823	1.74814	0.900143	2.03765	1.55549	-2.42179	2.65161	1.03765	0.38557	-0.832022	-2.42179	-2.42179	-2.42179
1	Nsylvestris_NODE_10398_length_2062_cov_171	LYK3_ARATH^LYK3_ARATH^Q:1993-89,H:21-651^65.474%ID^E:0^RecName: Full=LysM domain receptor-like kinase 3;^Eukaryota; Viridiplantae; Streptophyta; Embryophyta; Tracheophyta; Spermatophyta; Magnoliopsida; eudicotyledons; Gunneridae; Pentapetalae; rosids; malvids; Brassicales; Brassicaceae; Camelineae; Arabidopsis	-0.630901	0.502264	0.647257	0.78541	-0.176156	1.31675	1.06502	1.24297	0.920203	-0.579098	0.523597	0.41536	0.863453	-0.462732	-1.21306	-3.14817	-2.07217
1	Nsylvestris_NODE_10399_length_2062_cov_164	TRUA_RICCN^TRUA_RICCN^Q:1832-876,H:1-245^35.11%ID^E:1.44e-49^RecName: Full=tRNA pseudouridine synthase A {ECO:0000255|HAMAP-Rule:MF_00171};^Bacteria; Proteobacteria; Alphaproteobacteria; Rickettsiales; Rickettsiaceae; Rickettsieae; Rickettsia; spotted fever group	0.732162	1.29239	0.509273	0.624119	-0.204272	1.38971	1.506	1.53404	0.584248	-0.820609	0.300615	0.104359	0.0573541	-0.235647	-3.17401	-1.88499	-2.31474
1	Nsylvestris_NODE_104_length_8371_cov_45	POLX_TOBAC^POLX_TOBAC^Q:5584-7113,H:457-965^35.863%ID^E:0^RecName: Full=Retrovirus-related Pol polyprotein from transposon TNT 1-94;^Eukaryota; Viridiplantae; Streptophyta; Embryophyta; Tracheophyta; Spermatophyta; Magnoliopsida; eudicotyledons; Gunneridae; Pentapetalae; asterids; lamiids; Solanales; Solanaceae; Nicotianoideae; Nicotianeae; Nicotiana`POLX_TOBAC^POLX_TOBAC^Q:7092-8165,H:962-1325^3…	0.534312	1.23475	0.0368119	1.23475	0.197277	1.99374	1.64979	1.80733	1.40878	-0.14376	0.704237	0.649789	0.80733	0.0368119	-4.05065	-4.05065	-4.05065
1	Nsylvestris_NODE_10402_length_2062_cov_87	GH36_ARATH^GH36_ARATH^Q:312-2060,H:13-600^75.212%ID^E:0^RecName: Full=Indole-3-acetic acid-amido synthetase GH3.6;^Eukaryota; Viridiplantae; Streptophyta; Embryophyta; Tracheophyta; Spermatophyta; Magnoliopsida; eudicotyledons; Gunneridae; Pentapetalae; rosids; malvids; Brassicales; Brassicaceae; Camelineae; Arabidopsis	0.481929	2.05089	0.324269	0.25063	0.25388	1.98669	1.90923	2.41504	1.70186	0.338624	1.40752	0.686839	0.709897	0.686839	-5.06805	-5.06805	-5.06805
1	Nsylvestris_NODE_10404_length_2062_cov_17	.	0.667824	1.06375	0.741825	-1.5801	0.00485905	1.00486	0.812214	1.4199	1.54918	-0.580103	0.741825	0.419897	-0.995141	-0.410178	-0.700398	-1.5801	-2.5801
1	Nsylvestris_NODE_10407_length_2061_cov_201	FUCO1_ARATH^FUCO1_ARATH^Q:327-1661,H:40-484^70.022%ID^E:0^RecName: Full=Alpha-L-fucosidase 1;^Eukaryota; Viridiplantae; Streptophyta; Embryophyta; Tracheophyta; Spermatophyta; Magnoliopsida; eudicotyledons; Gunneridae; Pentapetalae; rosids; malvids; Brassicales; Brassicaceae; Camelineae; Arabidopsis	1.03955	2.0362	0.342958	1.32237	0.553321	1.95224	2.18915	2.28678	1.58405	0.41419	1.57242	0.409113	0.0731768	0.200789	-5.9025	-5.9025	-4.17132
1	Nsylvestris_NODE_10408_length_2061_cov_153	GASA6_ARATH^GASA6_ARATH^Q:1577-1756,H:42-101^85%ID^E:6.97e-26^RecName: Full=Gibberellin-regulated protein 6;^Eukaryota; Viridiplantae; Streptophyta; Embryophyta; Tracheophyta; Spermatophyta; Magnoliopsida; eudicotyledons; Gunneridae; Pentapetalae; rosids; malvids; Brassicales; Brassicaceae; Camelineae; Arabidopsis	0.0836339	0.845323	1.10166	1.79069	0.526186	0.282903	1.05245	0.774899	-0.305284	-0.971274	-0.161114	-0.691789	-0.309414	-1.32339	-0.616352	-0.510559	-1.56857
1	Nsylvestris_NODE_10411_length_2061_cov_55	FRS5_ARATH^FRS5_ARATH^Q:1188-883,H:72-178^47.664%ID^E:2.76e-06^RecName: Full=Protein FAR1-RELATED SEQUENCE 5;^Eukaryota; Viridiplantae; Streptophyta; Embryophyta; Tracheophyta; Spermatophyta; Magnoliopsida; eudicotyledons; Gunneridae; Pentapetalae; rosids; malvids; Brassicales; Brassicaceae; Camelineae; Arabidopsis	-0.750252	0.136103	-0.430056	-0.902255	0.137274	1.34432	1.65533	0.857848	0.624092	1.0891	0.394774	0.735175	0.889212	0.0455153	-1.45747	-2.05782	-2.31089
1	Nsylvestris_NODE_10413_length_2061_cov_41	.	-1.25397	-2.25397	0.330994	1.91596	1.91596	2.25763	1.75771	1.99016	0.0679599	-1.25397	0.330994	0.330994	0.557503	0.0679599	-2.25397	-2.25397	-2.25397
1	Nsylvestris_NODE_10414_length_2061_cov_12	.	0.620816	1.48331	-0.0312604	0.33131	-0.516687	1.62082	2.07068	1.48331	1.24885	-0.838615	1.0702	0.161385	0.33131	-0.519576	-2.83862	-2.83862	-2.83862
1	Nsylvestris_NODE_10416_length_2060_cov_216	UBP15_ARATH^UBP15_ARATH^Q:4-1647,H:373-869^63.291%ID^E:0^RecName: Full=Ubiquitin carboxyl-terminal hydrolase 15 {ECO:0000305};^Eukaryota; Viridiplantae; Streptophyta; Embryophyta; Tracheophyta; Spermatophyta; Magnoliopsida; eudicotyledons; Gunneridae; Pentapetalae; rosids; malvids; Brassicales; Brassicaceae; Camelineae; Arabidopsis	0.993448	1.89892	0.986836	0.319564	0.0808326	1.95895	1.59074	2.13296	1.11336	0.078317	0.939272	0.722049	0.468821	0.238119	-4.80959	-3.22756	-5.48504
1	Nsylvestris_NODE_10418_length_2060_cov_114	ICP0_EHV1V^ICP0_EHV1V^Q:1732-1520,H:2-69^39.437%ID^E:4.74e-06^RecName: Full=E3 ubiquitin-protein ligase ICP0;^Viruses; Herpesvirales; Herpesviridae; Alphaherpesvirinae; Varicellovirus	0.817499	1.88532	0.396145	0.802147	0.0326012	1.75509	2.26205	1.81094	1.24701	0.12069	1.22442	0.440259	0.576689	0.107666	-4.49284	-4.49284	-4.49284
1	Nsylvestris_NODE_10419_length_2060_cov_31	RH35_ARATH^RH35_ARATH^Q:1026-1889,H:304-591^92.361%ID^E:0^RecName: Full=DEAD-box ATP-dependent RNA helicase 35;^Eukaryota; Viridiplantae; Streptophyta; Embryophyta; Tracheophyta; Spermatophyta; Magnoliopsida; eudicotyledons; Gunneridae; Pentapetalae; rosids; malvids; Brassicales; Brassicaceae; Camelineae; Arabidopsis`RH35_ARATH^RH35_ARATH^Q:716-1000,H:211-305^78.947%ID^E:0^RecName: Full=DEAD-box …	0.0544914	1.23892	0.392073	0.180022	-1.08301	1.35048	1.76498	1.88046	1.05449	-0.235015	0.295499	0.916988	0.764985	0.0544914	-3.40494	-1.81998	-3.40494
1	Nsylvestris_NODE_10422_length_2059_cov_215	MD15A_ARATH^MD15A_ARATH^Q:901-1161,H:21-109^67.416%ID^E:3.25e-29^RecName: Full=Mediator of RNA polymerase II transcription subunit 15a;^Eukaryota; Viridiplantae; Streptophyta; Embryophyta; Tracheophyta; Spermatophyta; Magnoliopsida; eudicotyledons; Gunneridae; Pentapetalae; rosids; malvids; Brassicales; Brassicaceae; Camelineae; Arabidopsis`MD15A_ARATH^MD15A_ARATH^Q:580-801,H:22-95^70.27%ID^E:9.9…	0.412996	1.3315	0.340197	0.462864	0.531949	2.01864	1.74771	1.28705	1.63451	0.441582	1.03125	0.616053	1.14004	0.501067	-5.63788	-4.0553	-3.80424
1	Nsylvestris_NODE_10425_length_2059_cov_168	ZDHC9_ARATH^ZDHC9_ARATH^Q:418-1698,H:1-425^65.349%ID^E:0^RecName: Full=Probable protein S-acyltransferase 7;^Eukaryota; Viridiplantae; Streptophyta; Embryophyta; Tracheophyta; Spermatophyta; Magnoliopsida; eudicotyledons; Gunneridae; Pentapetalae; rosids; malvids; Brassicales; Brassicaceae; Camelineae; Arabidopsis	0.287924	1.02557	1.07735	1.25372	0.749123	1.70737	1.57858	1.61442	1.10501	0.224243	0.769214	1.06568	0.985163	0.432744	-4.76084	-5.25049	-3.86478
1	Nsylvestris_NODE_1043_length_4887_cov_110	MD19A_ARATH^MD19A_ARATH^Q:3498-3184,H:10-114^68.571%ID^E:1.37e-40^RecName: Full=Mediator of RNA polymerase II transcription subunit 19a;^Eukaryota; Viridiplantae; Streptophyta; Embryophyta; Tracheophyta; Spermatophyta; Magnoliopsida; eudicotyledons; Gunneridae; Pentapetalae; rosids; malvids; Brassicales; Brassicaceae; Camelineae; Arabidopsis	0.0106058	0.570545	0.107549	-0.139671	-0.752346	1.71996	1.90631	1.08189	1.29007	-0.293537	0.388979	0.268425	0.387139	-0.160216	-2.00351	-2.54068	-1.84152
1	Nsylvestris_NODE_10430_length_2059_cov_114	MYBC1_ARATH^MYBC1_ARATH^Q:1580-945,H:1-204^58.065%ID^E:1.05e-52^RecName: Full=Transcription factor MYBC1 {ECO:0000305};^Eukaryota; Viridiplantae; Streptophyta; Embryophyta; Tracheophyta; Spermatophyta; Magnoliopsida; eudicotyledons; Gunneridae; Pentapetalae; rosids; malvids; Brassicales; Brassicaceae; Camelineae; Arabidopsis	1.15865	1.47698	0.517995	1.03219	-0.846492	1.90087	1.76452	1.4447	2.11512	0.704924	1.94613	1.48109	1.2748	0.988503	-5.65333	-5.65333	-5.65333
1	Nsylvestris_NODE_10437_length_2057_cov_151	KELP_ARATH^KELP_ARATH^Q:195-662,H:13-164^63.462%ID^E:3.15e-50^RecName: Full=RNA polymerase II transcriptional coactivator KELP;^Eukaryota; Viridiplantae; Streptophyta; Embryophyta; Tracheophyta; Spermatophyta; Magnoliopsida; eudicotyledons; Gunneridae; Pentapetalae; rosids; malvids; Brassicales; Brassicaceae; Camelineae; Arabidopsis	0.321028	1.08612	-0.318767	0.734496	-0.271263	0.889605	1.42434	1.18334	0.488714	0.252674	-0.161027	0.31127	0.238326	-0.363445	-1.83948	-1.85926	-2.11667
1	Nsylvestris_NODE_10439_length_2058_cov_63	.	0.488134	1.51157	0.489936	0.452347	-0.189938	1.94757	1.52376	1.68977	1.18835	0.295076	1.0731	0.894126	0.6587	0.947828	-4.83379	-3.30272	-4.83379
1	Nsylvestris_NODE_1044_length_4886_cov_109	MLH3_ARATH^MLH3_ARATH^Q:2319-1039,H:752-1155^51.044%ID^E:1.6e-122^RecName: Full=DNA mismatch repair protein MLH3;^Eukaryota; Viridiplantae; Streptophyta; Embryophyta; Tracheophyta; Spermatophyta; Magnoliopsida; eudicotyledons; Gunneridae; Pentapetalae; rosids; malvids; Brassicales; Brassicaceae; Camelineae; Arabidopsis`MLH3_ARATH^MLH3_ARATH^Q:4617-3601,H:1-309^50.147%ID^E:4.54e-91^RecName: Full=D…	0.416345	1.53205	0.00289069	-0.0932291	0.203871	2.51564	2.77239	2.27858	1.16214	0.738748	0.981966	1.34712	0.771866	0.925679	-5.18535	-5.18535	-5.18535
1	Nsylvestris_NODE_10440_length_2058_cov_33	.	0.202433	1.23485	-0.256999	0.497889	0.0649293	1.06493	1.72028	0.912926	0.550356	-0.935071	0.135319	-0.169536	-0.0870737	-0.556559	-1.257	-1.44964	-1.67204
1	Nsylvestris_NODE_10441_length_2058_cov_22	CMKMT_ARATH^CMKMT_ARATH^Q:1241-1510,H:211-300^60%ID^E:1.47e-29^RecName: Full=Calmodulin-lysine N-methyltransferase {ECO:0000303|PubMed:24285794};^Eukaryota; Viridiplantae; Streptophyta; Embryophyta; Tracheophyta; Spermatophyta; Magnoliopsida; eudicotyledons; Gunneridae; Pentapetalae; rosids; malvids; Brassicales; Brassicaceae; Camelineae; Arabidopsis`CMKMT_ARATH^CMKMT_ARATH^Q:202-501,H:11-127^52.…	-0.128022	0.132606	0.719975	0.135012	-2.44995	1.45694	1.87198	2.30494	0.871978	-0.864988	1.25049	-0.864988	1.45694	1.45694	-2.44995	-2.44995	-2.44995
1	Nsylvestris_NODE_10442_length_2057_cov_225	APY2_ARATH^APY2_ARATH^Q:350-1735,H:5-471^68.094%ID^E:0^RecName: Full=Apyrase 2;^Eukaryota; Viridiplantae; Streptophyta; Embryophyta; Tracheophyta; Spermatophyta; Magnoliopsida; eudicotyledons; Gunneridae; Pentapetalae; rosids; malvids; Brassicales; Brassicaceae; Camelineae; Arabidopsis	0.89127	1.54544	0.874821	1.53637	0.0347689	1.73906	2.07228	1.97156	1.14085	0.169747	0.861146	0.531647	0.612819	-0.0130993	-5.04101	-3.5445	-5.38315
1	Nsylvestris_NODE_10448_length_2057_cov_108	.	-0.0542783	0.804209	0.409781	0.530435	-0.0468366	1.17803	1.62797	0.378617	0.970013	0.153581	-0.15282	0.33485	0.10986	-0.197164	-2.10515	-1.38895	-2.55214
1	Nsylvestris_NODE_10450_length_2057_cov_27	DNJB4_PONAB^DNJB4_PONAB^Q:1613-645,H:1-334^42.56%ID^E:2.88e-76^RecName: Full=DnaJ homolog subfamily B member 4;^Eukaryota; Metazoa; Chordata; Craniata; Vertebrata; Euteleostomi; Mammalia; Eutheria; Euarchontoglires; Primates; Haplorrhini; Catarrhini; Hominidae; Pongo	-0.634846	2.32541	0.195941	0.896874	-0.166629	1.93291	2.34794	0.833371	0.0242116	-2.97398	0.485448	0.833371	0.988565	-0.166629	-0.973984	-2.97398	-2.97398
1	Nsylvestris_NODE_10452_length_2056_cov_230	AAP3_ARATH^AAP3_ARATH^Q:394-1812,H:3-474^75.053%ID^E:0^RecName: Full=Amino acid permease 3;^Eukaryota; Viridiplantae; Streptophyta; Embryophyta; Tracheophyta; Spermatophyta; Magnoliopsida; eudicotyledons; Gunneridae; Pentapetalae; rosids; malvids; Brassicales; Brassicaceae; Camelineae; Arabidopsis	0.309672	1.07575	0.221498	0.347103	1.44951	2.67149	1.78192	1.91083	0.963203	0.790396	1.67559	0.764807	0.812866	-0.410815	-4.78794	-4.78794	-4.78794
1	Nsylvestris_NODE_1046_length_4885_cov_87	POLR1_ARATH^POLR1_ARATH^Q:4055-4522,H:1194-1349^41.667%ID^E:2.3e-91^RecName: Full=Retrovirus-related Pol polyprotein from transposon RE1;^Eukaryota; Viridiplantae; Streptophyta; Embryophyta; Tracheophyta; Spermatophyta; Magnoliopsida; eudicotyledons; Gunneridae; Pentapetalae; rosids; malvids; Brassicales; Brassicaceae; Camelineae; Arabidopsis`POLR1_ARATH^POLR1_ARATH^Q:3645-4049,H:1057-1191^52.593…	0.44193	1.35051	0.297361	0.510818	-1.11827	1.44068	1.77792	1.63458	0.642404	0.352061	0.746785	0.117474	0.0665912	-0.0289735	-3.31211	-3.02349	-1.89625
1	Nsylvestris_NODE_10460_length_2055_cov_118	PLI2B_ARATH^PLI2B_ARATH^Q:281-832,H:1-183^72.826%ID^E:1.47e-94^RecName: Full=LIM domain-containing protein PLIM2b {ECO:0000305};^Eukaryota; Viridiplantae; Streptophyta; Embryophyta; Tracheophyta; Spermatophyta; Magnoliopsida; eudicotyledons; Gunneridae; Pentapetalae; rosids; malvids; Brassicales; Brassicaceae; Camelineae; Arabidopsis`PLI2B_ARATH^PLI2B_ARATH^Q:572-835,H:3-90^46.591%ID^E:1.25e-18^R…	0.383922	3.28152	0.475182	-0.660773	1.32962	0.946244	-0.341401	0.0495627	1.52374	-0.837096	-0.468483	1.78791	0.371491	-0.889326	-1.6736	-2.85646	-2.42206
1	Nsylvestris_NODE_10461_length_2055_cov_82	SYT1_ARATH^SYT1_ARATH^Q:190-1806,H:1-541^70.98%ID^E:0^RecName: Full=Synaptotagmin-1;^Eukaryota; Viridiplantae; Streptophyta; Embryophyta; Tracheophyta; Spermatophyta; Magnoliopsida; eudicotyledons; Gunneridae; Pentapetalae; rosids; malvids; Brassicales; Brassicaceae; Camelineae; Arabidopsis	-0.0357043	0.316207	0.0703089	0.533544	-0.95164	1.87119	2.14619	0.134221	0.45101	-0.0357043	1.02521	1.15728	1.66474	0.76027	-3.0357	-3.0357	-3.0357
1	Nsylvestris_NODE_10463_length_2055_cov_50	OFT29_ARATH^OFT29_ARATH^Q:655-1650,H:178-509^79.217%ID^E:0^RecName: Full=O-fucosyltransferase 29 {ECO:0000305};^Eukaryota; Viridiplantae; Streptophyta; Embryophyta; Tracheophyta; Spermatophyta; Magnoliopsida; eudicotyledons; Gunneridae; Pentapetalae; rosids; malvids; Brassicales; Brassicaceae; Camelineae; Arabidopsis`OFT29_ARATH^OFT29_ARATH^Q:377-628,H:82-167^75.581%ID^E:0^RecName: Full=O-fucosyl…	0.0205119	1.2385	-0.221358	0.607579	-1.09194	1.57609	2.43762	2.13799	0.442639	0.369506	0.390739	-0.171795	0.433475	-1.12562	-2.95366	-2.29511	-1.79516
1	Nsylvestris_NODE_10466_length_2055_cov_24	RLP26_ARATH^RLP26_ARATH^Q:1261-1593,H:388-496^41.441%ID^E:2.21e-34^RecName: Full=Receptor like protein 26 {ECO:0000303|PubMed:18434605};^Eukaryota; Viridiplantae; Streptophyta; Embryophyta; Tracheophyta; Spermatophyta; Magnoliopsida; eudicotyledons; Gunneridae; Pentapetalae; rosids; malvids; Brassicales; Brassicaceae; Camelineae; Arabidopsis`RLP26_ARATH^RLP26_ARATH^Q:1568-1987,H:488-619^33.333%ID…	-2.46473	-0.120998	0.463965	0.254181	-0.635571	1.25862	0.0165059	-0.635571	1.88368	-0.635571	-0.273001	1.60147	0.727801	1.08064	-0.442926	-0.635571	-1.44293
1	Nsylvestris_NODE_10467_length_2055_cov_13	DFRA_MEDSA^DFRA_MEDSA^Q:916-710,H:135-213^40.506%ID^E:7.17e-09^RecName: Full=Dihydroflavonol 4-reductase;^Eukaryota; Viridiplantae; Streptophyta; Embryophyta; Tracheophyta; Spermatophyta; Magnoliopsida; eudicotyledons; Gunneridae; Pentapetalae; rosids; fabids; Fabales; Fabaceae; Papilionoideae; 50 kb inversion clade; NPAAA clade; Hologalegina; IRL clade; Trifolieae; Medicago	-0.37152	1.62848	-0.37152	0.850873	-0.37152	1.95041	1.95041	0.850873	0.62848	0.62848	0.043518	-0.956482	1.36545	-1.95648	-1.95648	-1.95648	-1.95648
1	Nsylvestris_NODE_10469_length_2054_cov_107	FRIGI_ARATH^FRIGI_ARATH^Q:466-1392,H:148-459^43.131%ID^E:5.22e-80^RecName: Full=Protein FRIGIDA {ECO:0000303|PubMed:11030654};^Eukaryota; Viridiplantae; Streptophyta; Embryophyta; Tracheophyta; Spermatophyta; Magnoliopsida; eudicotyledons; Gunneridae; Pentapetalae; rosids; malvids; Brassicales; Brassicaceae; Camelineae; Arabidopsis	0.0129497	1.06291	0.460854	0.449604	-0.344625	0.694301	0.909524	0.763152	1.06118	-0.397494	0.796814	0.264661	0.433838	-0.0780143	-1.43021	-2.37751	-2.28193
1	Nsylvestris_NODE_10471_length_2054_cov_36	PPR85_ARATH^PPR85_ARATH^Q:36-1820,H:33-638^62.438%ID^E:0^RecName: Full=Pentatricopeptide repeat-containing protein At1g59720, chloroplastic/mitochondrial {ECO:0000305};^Eukaryota; Viridiplantae; Streptophyta; Embryophyta; Tracheophyta; Spermatophyta; Magnoliopsida; eudicotyledons; Gunneridae; Pentapetalae; rosids; malvids; Brassicales; Brassicaceae; Camelineae; Arabidopsis	0.810184	1.62333	-0.653296	0.0603406	0.623333	1.67224	1.87388	1.57271	1.58834	0.350315	0.925224	0.466347	0.676565	1.11443	-4.23465	-4.23465	-4.23465
1	Nsylvestris_NODE_10473_length_2053_cov_228	LCAT4_ARATH^LCAT4_ARATH^Q:245-1849,H:1-535^64.75%ID^E:0^RecName: Full=Lecithin-cholesterol acyltransferase-like 4;^Eukaryota; Viridiplantae; Streptophyta; Embryophyta; Tracheophyta; Spermatophyta; Magnoliopsida; eudicotyledons; Gunneridae; Pentapetalae; rosids; malvids; Brassicales; Brassicaceae; Camelineae; Arabidopsis	0.736648	1.68457	0.615767	0.966745	-0.156786	1.7743	1.4605	1.69043	1.37096	0.240039	1.55858	0.74722	0.64797	0.881298	-4.97128	-4.06589	-5.18106
1	Nsylvestris_NODE_10474_length_2053_cov_225	VPS4_ARATH^VPS4_ARATH^Q:355-1638,H:1-429^83.759%ID^E:0^RecName: Full=Protein SUPPRESSOR OF K(+) TRANSPORT GROWTH DEFECT 1 {ECO:0000303|PubMed:17468262};^Eukaryota; Viridiplantae; Streptophyta; Embryophyta; Tracheophyta; Spermatophyta; Magnoliopsida; eudicotyledons; Gunneridae; Pentapetalae; rosids; malvids; Brassicales; Brassicaceae; Camelineae; Arabidopsis	-0.105871	0.577505	-0.0857777	0.109538	-0.567301	1.54612	1.66959	1.69331	0.798066	0.719534	0.686025	0.346627	0.444863	0.269802	-2.63626	-2.1567	-3.30907
1	Nsylvestris_NODE_10476_length_2053_cov_200	ASHH1_ARATH^ASHH1_ARATH^Q:1758-421,H:13-463^59.121%ID^E:8.86e-179^RecName: Full=Histone-lysine N-methyltransferase ASHH1 {ECO:0000305};^Eukaryota; Viridiplantae; Streptophyta; Embryophyta; Tracheophyta; Spermatophyta; Magnoliopsida; eudicotyledons; Gunneridae; Pentapetalae; rosids; malvids; Brassicales; Brassicaceae; Camelineae; Arabidopsis	-0.211647	0.827526	-0.356271	-0.280137	-0.613867	1.25062	1.26824	1.07538	1.22361	0.661815	1.13612	0.687138	0.704197	0.418539	-2.98776	-2.35994	-2.44356
1	Nsylvestris_NODE_1048_length_4882_cov_42	MOM1_ARATH^MOM1_ARATH^Q:3000-1732,H:416-827^35.897%ID^E:1.21e-59^RecName: Full=Helicase protein MOM1;^Eukaryota; Viridiplantae; Streptophyta; Embryophyta; Tracheophyta; Spermatophyta; Magnoliopsida; eudicotyledons; Gunneridae; Pentapetalae; rosids; malvids; Brassicales; Brassicaceae; Camelineae; Arabidopsis	1.23935	2.86163	0.359075	0.319059	0.530072	2.17704	2.19999	2.29634	-0.158634	-2.61744	0.309107	-0.104419	0.890129	-0.243979	-3.68094	-2.69544	-3.68094
1	Nsylvestris_NODE_10484_length_2052_cov_194	RSH1L_ARATH^RSH1L_ARATH^Q:3-1502,H:384-883^70.179%ID^E:0^RecName: Full=Putative GTP diphosphokinase RSH1, chloroplastic;^Eukaryota; Viridiplantae; Streptophyta; Embryophyta; Tracheophyta; Spermatophyta; Magnoliopsida; eudicotyledons; Gunneridae; Pentapetalae; rosids; malvids; Brassicales; Brassicaceae; Camelineae; Arabidopsis	0.0675597	1.2531	0.31643	-0.111504	-0.140231	1.63911	1.57214	1.07859	2.09106	0.730315	1.54014	1.78746	2.24575	2.00269	-4.49176	-5.79042	-5.79042
1	Nsylvestris_NODE_10485_length_2052_cov_157	YKIC_SCHPO^YKIC_SCHPO^Q:217-1305,H:1-346^27.568%ID^E:8.74e-35^RecName: Full=Uncharacterized protein C630.12;^Eukaryota; Fungi; Dikarya; Ascomycota; Taphrinomycotina; Schizosaccharomycetes; Schizosaccharomycetales; Schizosaccharomycetaceae; Schizosaccharomyces	0.60253	2.09427	0.622876	0.810248	-0.338458	2.31439	1.91355	1.66178	1.9561	0.191109	1.68178	0.243342	1.12939	0.916139	-5.26635	-5.26635	-5.26635
1	Nsylvestris_NODE_10486_length_2052_cov_139	PPIL3_CHICK^PPIL3_CHICK^Q:1302-1781,H:3-161^28.07%ID^E:4.5e-10^RecName: Full=Peptidyl-prolyl cis-trans isomerase-like 3;^Eukaryota; Metazoa; Chordata; Craniata; Vertebrata; Euteleostomi; Archelosauria; Archosauria; Dinosauria; Saurischia; Theropoda; Coelurosauria; Aves; Neognathae; Galloanserae; Galliformes; Phasianidae; Phasianinae; Gallus	0.582009	1.30236	0.420986	0.867983	-0.0690648	1.60495	1.96748	1.81861	1.23665	0.269923	1.09925	1.01948	0.958974	-0.146311	-6.12976	-3.76799	-3.03552
1	Nsylvestris_NODE_10489_length_2052_cov_56	.	0.612071	1.66865	0.13814	-0.446822	0.290143	1.01261	2.34325	1.05568	0.922412	-1.22443	0.723103	-0.22443	0.489894	-0.124894	-4.03178	-1.44682	-1.75678
1	Nsylvestris_NODE_10492_length_2051_cov_156	KAN2_ARATH^KAN2_ARATH^Q:1074-448,H:191-386^61.905%ID^E:5.62e-63^RecName: Full=Probable transcription factor KAN2;^Eukaryota; Viridiplantae; Streptophyta; Embryophyta; Tracheophyta; Spermatophyta; Magnoliopsida; eudicotyledons; Gunneridae; Pentapetalae; rosids; malvids; Brassicales; Brassicaceae; Camelineae; Arabidopsis`KAN2_ARATH^KAN2_ARATH^Q:1662-1516,H:1-50^72.549%ID^E:3.36e-12^RecName: Full=Pr…	0.47847	1.46718	0.513794	0.694151	1.02709	0.669608	0.534554	0.102367	0.957012	-0.345487	0.247593	0.353329	0.572316	0.0797687	-3.26548	-1.82973	-2.25653
1	Nsylvestris_NODE_10493_length_2050_cov_148	Y1926_ARATH^Y1926_ARATH^Q:1895-1437,H:7-158^66.667%ID^E:2.21e-63^RecName: Full=UPF0678 fatty acid-binding protein-like protein At1g79260;^Eukaryota; Viridiplantae; Streptophyta; Embryophyta; Tracheophyta; Spermatophyta; Magnoliopsida; eudicotyledons; Gunneridae; Pentapetalae; rosids; malvids; Brassicales; Brassicaceae; Camelineae; Arabidopsis	0.160156	0.198098	-0.452919	0.372714	-1.57394	1.11274	1.56133	0.809609	1.64091	0.973039	1.30013	1.12127	1.08271	0.348195	-3.79578	-1.91362	-2.94465
1	Nsylvestris_NODE_10497_length_2051_cov_80	AAE11_ARATH^AAE11_ARATH^Q:1905-238,H:1-562^59.115%ID^E:0^RecName: Full=Butyrate--CoA ligase AAE11, peroxisomal;^Eukaryota; Viridiplantae; Streptophyta; Embryophyta; Tracheophyta; Spermatophyta; Magnoliopsida; eudicotyledons; Gunneridae; Pentapetalae; rosids; malvids; Brassicales; Brassicaceae; Camelineae; Arabidopsis	-0.565202	0.613135	-1.00577	-0.420812	0.0448513	-0.420812	0.472273	0.678723	0.741459	-0.81313	0.613135	2.34664	0.509159	1.31595	-1.11269	-1.6432	-1.3537
1	Nsylvestris_NODE_10499_length_2051_cov_30	.	0.756737	1.3417	-0.828225	-1.24326	0.171775	1.25924	1.4197	1.3417	1.17177	0.171775	1.3417	-0.0208706	1.25924	0.3417	-2.82823	-2.82823	-2.82823
1	Nsylvestris_NODE_1050_length_4878_cov_96	PD5BB_XENLA^PD5BB_XENLA^Q:1804-1298,H:63-233^30.994%ID^E:1.04e-19^RecName: Full=Sister chromatid cohesion protein PDS5 homolog B-B;^Eukaryota; Metazoa; Chordata; Craniata; Vertebrata; Euteleostomi; Amphibia; Batrachia; Anura; Pipoidea; Pipidae; Xenopodinae; Xenopus; Xenopus	0.0174071	1.3731	-0.434132	-0.35329	-0.320436	1.74292	1.01317	1.09029	1.00513	-0.258029	-0.25765	0.508821	1.0026	0.408425	-1.55663	-2.56036	-2.42133
1	Nsylvestris_NODE_10504_length_2050_cov_57	.	0.0635587	0.948381	-0.0886247	0.950388	0.389423	1.13898	1.22255	0.703933	0.819639	-0.469715	0.612924	0.0845028	0.510693	-0.220164	-2.02217	-1.91504	-2.72926
1	Nsylvestris_NODE_10506_length_2050_cov_28	COL12_ARATH^COL12_ARATH^Q:1747-488,H:1-358^42.353%ID^E:7.4e-90^RecName: Full=Zinc finger protein CONSTANS-LIKE 12;^Eukaryota; Viridiplantae; Streptophyta; Embryophyta; Tracheophyta; Spermatophyta; Magnoliopsida; eudicotyledons; Gunneridae; Pentapetalae; rosids; malvids; Brassicales; Brassicaceae; Camelineae; Arabidopsis	0.0373833	1.78741	0.825879	0.747877	0.89988	0.970269	0.278391	1.03738	-1.83709	-1.42205	-1.10012	-0.837086	0.747877	0.278391	0.0373833	-1.83709	-0.614693
1	Nsylvestris_NODE_10511_length_2049_cov_144	SAMC1_ARATH^SAMC1_ARATH^Q:1088-360,H:82-324^81.481%ID^E:1.4e-138^RecName: Full=S-adenosylmethionine carrier 1, chloroplastic/mitochondrial;^Eukaryota; Viridiplantae; Streptophyta; Embryophyta; Tracheophyta; Spermatophyta; Magnoliopsida; eudicotyledons; Gunneridae; Pentapetalae; rosids; malvids; Brassicales; Brassicaceae; Camelineae; Arabidopsis`SAMC1_ARATH^SAMC1_ARATH^Q:1835-1593,H:1-83^66.265%ID…	1.05255	1.53322	0.50546	0.633346	-0.106761	2.02645	2.07057	1.84528	1.21249	0.433488	1.33534	0.778957	1.41334	1.17967	-5.30447	-5.30447	-5.30447
1	Nsylvestris_NODE_10512_length_2049_cov_112	GLR33_ARATH^GLR33_ARATH^Q:1117-308,H:620-892^70.758%ID^E:5.92e-115^RecName: Full=Glutamate receptor 3.3;^Eukaryota; Viridiplantae; Streptophyta; Embryophyta; Tracheophyta; Spermatophyta; Magnoliopsida; eudicotyledons; Gunneridae; Pentapetalae; rosids; malvids; Brassicales; Brassicaceae; Camelineae; Arabidopsis	0.949708	1.6286	0.341408	0.801381	0.429922	1.66903	1.21853	1.45638	1.46878	-0.159472	1.07101	0.618024	1.27003	0.454494	-5.18184	-5.18184	-2.85415
1	Nsylvestris_NODE_10515_length_2049_cov_72	CML30_ARATH^CML30_ARATH^Q:923-402,H:1-178^50.838%ID^E:2.16e-57^RecName: Full=Calmodulin-like protein 30 {ECO:0000303|Ref.4};^Eukaryota; Viridiplantae; Streptophyta; Embryophyta; Tracheophyta; Spermatophyta; Magnoliopsida; eudicotyledons; Gunneridae; Pentapetalae; rosids; malvids; Brassicales; Brassicaceae; Camelineae; Arabidopsis	0.405018	0.88034	0.645272	0.638141	-0.118821	1.48823	2.00984	1.6648	1.48878	0.486027	1.2485	1.12513	0.508361	0.508144	-4.52327	-3.93122	-4.52327
1	Nsylvestris_NODE_10524_length_2048_cov_48	PPR75_ARATH^PPR75_ARATH^Q:1958-222,H:3-584^48.288%ID^E:0^RecName: Full=Pentatricopeptide repeat-containing protein At1g50270;^Eukaryota; Viridiplantae; Streptophyta; Embryophyta; Tracheophyta; Spermatophyta; Magnoliopsida; eudicotyledons; Gunneridae; Pentapetalae; rosids; malvids; Brassicales; Brassicaceae; Camelineae; Arabidopsis	1.5354	1.88748	0.620626	1.24803	0.107273	1.37848	1.22222	1.50853	1.18876	-0.448269	1.17973	0.373733	0.639194	-0.0351929	-4.13533	-4.13533	-4.13533
1	Nsylvestris_NODE_10525_length_2048_cov_40	NFD4_ARATH^NFD4_ARATH^Q:74-1747,H:2-563^23.529%ID^E:1.09e-23^RecName: Full=Protein NUCLEAR FUSION DEFECTIVE 4 {ECO:0000303|PubMed:16698901};^Eukaryota; Viridiplantae; Streptophyta; Embryophyta; Tracheophyta; Spermatophyta; Magnoliopsida; eudicotyledons; Gunneridae; Pentapetalae; rosids; malvids; Brassicales; Brassicaceae; Camelineae; Arabidopsis	0.679815	1.00706	1.07916	0.64449	-0.971868	2.29117	2.02813	0.0281322	1.56766	0.429763	0.104007	0.165636	1.53707	-0.708833	-3.2938	-3.2938	-3.2938
1	Nsylvestris_NODE_10530_length_2047_cov_16	.	-0.253492	1.83397	-0.446137	-1.66853	0.446948	0.746508	1.99444	1.32665	1.7438	0.0684359	1.56311	0.332672	1.74063	0.33147	-3.25349	-3.25349	-3.25349
1	Nsylvestris_NODE_10531_length_2046_cov_216	PUM23_ARATH^PUM23_ARATH^Q:522-1676,H:35-420^49.742%ID^E:4.8e-117^RecName: Full=Pumilio homolog 23;^Eukaryota; Viridiplantae; Streptophyta; Embryophyta; Tracheophyta; Spermatophyta; Magnoliopsida; eudicotyledons; Gunneridae; Pentapetalae; rosids; malvids; Brassicales; Brassicaceae; Camelineae; Arabidopsis	0.438726	1.2617	-0.344625	1.04114	0.736377	1.80111	2.18069	1.62475	1.60695	1.01447	0.987777	0.594205	1.35898	0.518615	-5.49071	-4.8538	-4.47635
1	Nsylvestris_NODE_10533_length_2046_cov_204	CISY_DAUCA^CISY_DAUCA^Q:194-1603,H:1-471^88.535%ID^E:0^RecName: Full=Citrate synthase, mitochondrial;^Eukaryota; Viridiplantae; Streptophyta; Embryophyta; Tracheophyta; Spermatophyta; Magnoliopsida; eudicotyledons; Gunneridae; Pentapetalae; asterids; campanulids; Apiales; Apiaceae; Apioideae; Scandiceae; Daucinae; Daucus; Daucus sect. Daucus	0.175963	0.686103	0.145361	0.600106	-0.33537	1.69024	1.23977	1.56799	0.931839	-0.0722953	0.455034	0.212944	0.483267	-0.214309	-2.21367	-2.994	-2.35898
1	Nsylvestris_NODE_10538_length_2046_cov_41	FBX15_ARATH^FBX15_ARATH^Q:240-959,H:1-230^30.522%ID^E:1.45e-14^RecName: Full=Putative F-box only protein 15;^Eukaryota; Viridiplantae; Streptophyta; Embryophyta; Tracheophyta; Spermatophyta; Magnoliopsida; eudicotyledons; Gunneridae; Pentapetalae; rosids; malvids; Brassicales; Brassicaceae; Camelineae; Arabidopsis	-2.13532	0.449643	-0.550357	-0.550357	-1.13532	-1.13532	-1.13532	0.449643	2.95214	1.56512	2.51084	1.03461	2.05134	1.03461	-1.13532	-2.13532	-2.13532
1	Nsylvestris_NODE_10544_length_2044_cov_204	EDA2_ARATH^EDA2_ARATH^Q:1847-516,H:42-487^68.161%ID^E:0^RecName: Full=Probable serine protease EDA2;^Eukaryota; Viridiplantae; Streptophyta; Embryophyta; Tracheophyta; Spermatophyta; Magnoliopsida; eudicotyledons; Gunneridae; Pentapetalae; rosids; malvids; Brassicales; Brassicaceae; Camelineae; Arabidopsis	0.0109172	0.659319	-0.130604	0.250995	-0.701057	1.59909	0.990418	0.856982	0.913032	-0.451213	0.520942	0.282905	0.503509	-0.122019	-1.90496	-1.75071	-1.52755
1	Nsylvestris_NODE_10551_length_2044_cov_11	.	0.865883	0.35131	-0.134117	-0.456045	0.543955	2.12892	-0.134117	1.96214	1.12892	-0.871083	1.12892	-2.45605	0.858651	-0.134117	-1.45605	-0.871083	-2.45605
1	Nsylvestris_NODE_10553_length_2043_cov_222	HMCS_ARATH^HMCS_ARATH^Q:269-1639,H:3-461^81.917%ID^E:0^RecName: Full=Hydroxymethylglutaryl-CoA synthase;^Eukaryota; Viridiplantae; Streptophyta; Embryophyta; Tracheophyta; Spermatophyta; Magnoliopsida; eudicotyledons; Gunneridae; Pentapetalae; rosids; malvids; Brassicales; Brassicaceae; Camelineae; Arabidopsis	0.13722	1.18244	0.209538	0.232017	-0.200558	1.65345	1.46117	1.55754	0.179043	-1.32961	0.332465	-0.28079	0.257102	-0.184208	-1.93828	-1.6908	-1.57773
1	Nsylvestris_NODE_1056_length_4873_cov_105	EAAC_ARATH^EAAC_ARATH^Q:1328-387,H:68-381^77.07%ID^E:4.07e-160^RecName: Full=Probable envelope ADP,ATP carrier protein, chloroplastic;^Eukaryota; Viridiplantae; Streptophyta; Embryophyta; Tracheophyta; Spermatophyta; Magnoliopsida; eudicotyledons; Gunneridae; Pentapetalae; rosids; malvids; Brassicales; Brassicaceae; Camelineae; Arabidopsis	0.594964	1.4508	1.04357	1.1041	-0.235182	0.566312	1.37366	1.03977	0.708989	0.362387	0.689385	0.196954	-0.152641	-0.0757192	-1.98404	-3.10036	-3.58296
1	Nsylvestris_NODE_10560_length_2042_cov_205	CDC21_ARATH^CDC21_ARATH^Q:323-1666,H:1-452^80.31%ID^E:0^RecName: Full=Cell division cycle 20.1, cofactor of APC complex;^Eukaryota; Viridiplantae; Streptophyta; Embryophyta; Tracheophyta; Spermatophyta; Magnoliopsida; eudicotyledons; Gunneridae; Pentapetalae; rosids; malvids; Brassicales; Brassicaceae; Camelineae; Arabidopsis	0.442552	1.14347	0.0389434	0.0907823	0.67774	1.21506	1.26015	1.40771	1.15855	0.328215	1.08403	-0.50219	0.532406	-0.28713	-2.71258	-2.71957	-3.15814
1	Nsylvestris_NODE_10562_length_2042_cov_108	IQD14_ARATH^IQD14_ARATH^Q:553-954,H:324-446^28.358%ID^E:1.51e-10^RecName: Full=Protein IQ-DOMAIN 14;^Eukaryota; Viridiplantae; Streptophyta; Embryophyta; Tracheophyta; Spermatophyta; Magnoliopsida; eudicotyledons; Gunneridae; Pentapetalae; rosids; malvids; Brassicales; Brassicaceae; Camelineae; Arabidopsis	0.234135	1.4176	0.460742	0.619171	0.984125	1.8333	1.77233	1.69778	1.4172	0.267508	0.926343	0.681293	1.34017	0.78884	-5.34661	-3.7473	-5.34661
1	Nsylvestris_NODE_10564_length_2042_cov_28	BC10_ORYSJ^BC10_ORYSJ^Q:968-186,H:85-386^34.967%ID^E:2.95e-34^RecName: Full=Glycosyltransferase BC10 {ECO:0000305};^Eukaryota; Viridiplantae; Streptophyta; Embryophyta; Tracheophyta; Spermatophyta; Magnoliopsida; Liliopsida; Poales; Poaceae; BOP clade; Oryzoideae; Oryzeae; Oryzinae; Oryza; Oryza sativa	0.340325	1.10779	0.718998	0.0338289	0.9654	1.17892	0.361781	-0.123646	0.861854	-1.34348	-0.330097	-0.320143	0.582406	-0.879977	-0.894673	-0.835189	-1.42409
1	Nsylvestris_NODE_10565_length_2042_cov_7	.	-0.852765	1.0217	-0.115799	-0.437727	0.369628	1.64974	1.26271	1.64974	1.56227	-0.437727	0.562273	0.147235	0.562273	0.369628	-2.43773	-2.43773	-2.43773
1	Nsylvestris_NODE_10570_length_2041_cov_128	OFT31_ARATH^OFT31_ARATH^Q:227-1657,H:39-517^73.695%ID^E:0^RecName: Full=O-fucosyltransferase 31 {ECO:0000305};^Eukaryota; Viridiplantae; Streptophyta; Embryophyta; Tracheophyta; Spermatophyta; Magnoliopsida; eudicotyledons; Gunneridae; Pentapetalae; rosids; malvids; Brassicales; Brassicaceae; Camelineae; Arabidopsis	0.0718496	0.738683	-0.14794	0.397551	-0.0154097	1.38397	1.04556	0.545833	0.796978	-1.36528	-0.202038	0.0883637	0.237789	0.0382434	-0.851417	-1.56855	-1.19418
1	Nsylvestris_NODE_10571_length_2041_cov_98	.	0.718291	1.28211	0.44486	0.722854	0.560974	1.95605	1.91233	0.912332	1.69732	0.53382	1.34972	1.44471	1.02213	0.772607	-5.11004	-5.11004	-5.11004
1	Nsylvestris_NODE_10577_length_2040_cov_216	MEX1_ARATH^MEX1_ARATH^Q:1571-402,H:22-414^56.75%ID^E:1.85e-120^RecName: Full=Maltose excess protein 1, chloroplastic;^Eukaryota; Viridiplantae; Streptophyta; Embryophyta; Tracheophyta; Spermatophyta; Magnoliopsida; eudicotyledons; Gunneridae; Pentapetalae; rosids; malvids; Brassicales; Brassicaceae; Camelineae; Arabidopsis	0.662608	1.45001	0.695651	0.568222	0.231382	1.30558	1.88108	1.62562	0.850645	0.213401	0.712818	0.432243	0.401693	0.261054	-3.81759	-3.79315	-3.68128
1	Nsylvestris_NODE_10582_length_2040_cov_49	LAC6_ARATH^LAC6_ARATH^Q:140-1837,H:10-569^66.254%ID^E:0^RecName: Full=Laccase-6;^Eukaryota; Viridiplantae; Streptophyta; Embryophyta; Tracheophyta; Spermatophyta; Magnoliopsida; eudicotyledons; Gunneridae; Pentapetalae; rosids; malvids; Brassicales; Brassicaceae; Camelineae; Arabidopsis	-0.567533	0.51993	0.51993	-0.760178	0.126233	1.75439	2.45483	1.85873	0.239822	-0.245605	0.238791	0.432467	-0.982571	0.528391	-1.98257	-2.56753	-1.56753
1	Nsylvestris_NODE_10583_length_2039_cov_219	GALK1_ARATH^GALK1_ARATH^Q:310-1809,H:1-496^75.4%ID^E:0^RecName: Full=Galactokinase;^Eukaryota; Viridiplantae; Streptophyta; Embryophyta; Tracheophyta; Spermatophyta; Magnoliopsida; eudicotyledons; Gunneridae; Pentapetalae; rosids; malvids; Brassicales; Brassicaceae; Camelineae; Arabidopsis	0.348188	1.45829	0.197391	0.303028	-0.483931	1.03201	0.836636	1.18137	0.431546	-0.708041	0.0977803	0.0957108	0.113526	-0.396045	-1.27574	-1.54445	-1.68727
1	Nsylvestris_NODE_10584_length_2039_cov_214	PRS6B_SOLTU^PRS6B_SOLTU^Q:1849-608,H:1-413^94.928%ID^E:0^RecName: Full=26S proteasome regulatory subunit 6B homolog;^Eukaryota; Viridiplantae; Streptophyta; Embryophyta; Tracheophyta; Spermatophyta; Magnoliopsida; eudicotyledons; Gunneridae; Pentapetalae; asterids; lamiids; Solanales; Solanaceae; Solanoideae; Solaneae; Solanum	0.959141	1.41854	0.895487	1.15896	0.354619	1.67219	1.4835	1.57539	1.07985	-0.400405	0.598581	0.753044	1.03442	0.583657	-6.69098	-2.76688	-3.70912
1	Nsylvestris_NODE_10587_length_2039_cov_180	AROD6_ARATH^AROD6_ARATH^Q:1639-584,H:26-402^80.106%ID^E:0^RecName: Full=Arogenate dehydratase/prephenate dehydratase 6, chloroplastic;^Eukaryota; Viridiplantae; Streptophyta; Embryophyta; Tracheophyta; Spermatophyta; Magnoliopsida; eudicotyledons; Gunneridae; Pentapetalae; rosids; malvids; Brassicales; Brassicaceae; Camelineae; Arabidopsis	0.974711	1.60234	0.514588	0.716639	-0.228004	1.34679	1.54983	1.66964	0.774895	-0.374032	0.681684	0.814345	1.38176	1.17512	-4.60342	-3.51444	-4.48244
1	Nsylvestris_NODE_10589_length_2039_cov_52	S40A2_ARATH^S40A2_ARATH^Q:288-1718,H:29-506^63.598%ID^E:0^RecName: Full=Solute carrier family 40 member 2;^Eukaryota; Viridiplantae; Streptophyta; Embryophyta; Tracheophyta; Spermatophyta; Magnoliopsida; eudicotyledons; Gunneridae; Pentapetalae; rosids; malvids; Brassicales; Brassicaceae; Camelineae; Arabidopsis	0.123955	0.925324	-0.0891744	0.584744	-0.841125	1.13733	0.881679	1.20948	0.975984	-0.271306	0.507665	0.794916	0.495788	0.67636	-2.73303	-1.64557	-2.73303
1	Nsylvestris_NODE_1059_length_4868_cov_65	.	1.19351	1.46685	0.285876	0.804455	0.560132	1.99338	1.95861	0.848985	2.03968	0.00875029	1.7583	0.987351	1.27744	1.0135	-5.39894	-5.39894	-5.39894
1	Nsylvestris_NODE_10591_length_2039_cov_47	LRK10_WHEAT^LRK10_WHEAT^Q:165-1832,H:29-630^39.546%ID^E:2.96e-127^RecName: Full=Rust resistance kinase Lr10 {ECO:0000312|EMBL:AAC49629.1};^Eukaryota; Viridiplantae; Streptophyta; Embryophyta; Tracheophyta; Spermatophyta; Magnoliopsida; Liliopsida; Poales; Poaceae; BOP clade; Pooideae; Triticodae; Triticeae; Triticinae; Triticum	-0.0861053	1.41139	0.14836	0.174806	0.285864	1.43376	2.36559	2.53999	0.470288	0.581319	1.33676	0.411394	0.411394	1.03589	-4.17357	-4.17357	-4.17357
1	Nsylvestris_NODE_10592_length_2039_cov_21	DRL23_ARATH^DRL23_ARATH^Q:1001-9,H:345-639^33.136%ID^E:2.02e-58^RecName: Full=Putative disease resistance protein At4g10780;^Eukaryota; Viridiplantae; Streptophyta; Embryophyta; Tracheophyta; Spermatophyta; Magnoliopsida; eudicotyledons; Gunneridae; Pentapetalae; rosids; malvids; Brassicales; Brassicaceae; Camelineae; Arabidopsis`DRL23_ARATH^DRL23_ARATH^Q:1871-1170,H:32-276^29.644%ID^E:2.02e-58^R…	0.438524	1.22945	-0.301689	0.572041	0.0404173	2.31078	2.98943	2.19242	-0.931014	0.149964	-0.508921	1.04602	0.757042	-0.595944	-3.12951	-3.12951	-3.12951
1	Nsylvestris_NODE_10596_length_2038_cov_122	STR6_ARATH^STR6_ARATH^Q:130-1899,H:29-581^64.983%ID^E:0^RecName: Full=Rhodanese-like domain-containing protein 6;^Eukaryota; Viridiplantae; Streptophyta; Embryophyta; Tracheophyta; Spermatophyta; Magnoliopsida; eudicotyledons; Gunneridae; Pentapetalae; rosids; malvids; Brassicales; Brassicaceae; Camelineae; Arabidopsis	0.923085	1.66225	0.21863	0.21396	-0.291498	1.69789	1.34113	1.65773	1.29148	0.328452	1.28903	0.777093	0.585638	0.691275	-4.78703	-3.38386	-4.21526
1	Nsylvestris_NODE_10599_length_2038_cov_18	POLR2_ARATH^POLR2_ARATH^Q:257-9,H:479-561^32.955%ID^E:3.51e-11^RecName: Full=Retrovirus-related Pol polyprotein from transposon RE2;^Eukaryota; Viridiplantae; Streptophyta; Embryophyta; Tracheophyta; Spermatophyta; Magnoliopsida; eudicotyledons; Gunneridae; Pentapetalae; rosids; malvids; Brassicales; Brassicaceae; Camelineae; Arabidopsis`POLR2_ARATH^POLR2_ARATH^Q:801-517,H:297-388^30.303%ID^E:3.5…	0.558561	0.937073	-0.441439	-0.441439	0.821596	1.48456	2.23663	1.62895	1.7602	0.406558	0.821596	0.236633	0.0439881	-1.76337	-2.76337	-2.76337	-2.76337
1	Nsylvestris_NODE_10600_length_2037_cov_137	CCS1_ARATH^CCS1_ARATH^Q:450-1553,H:97-547^50.552%ID^E:5.95e-131^RecName: Full=Cytochrome c biogenesis protein CCS1, chloroplastic;^Eukaryota; Viridiplantae; Streptophyta; Embryophyta; Tracheophyta; Spermatophyta; Magnoliopsida; eudicotyledons; Gunneridae; Pentapetalae; rosids; malvids; Brassicales; Brassicaceae; Camelineae; Arabidopsis	0.347963	0.863877	0.0796732	1.26519	-2.28139	1.68277	1.94877	0.581058	1.26303	-1.11147	0.769108	0.615847	1.09538	-0.551297	-2.68684	-1.93656	-1.94511
1	Nsylvestris_NODE_10603_length_2037_cov_14	LYK3_MEDTR^LYK3_MEDTR^Q:91-1881,H:21-620^57.166%ID^E:0^RecName: Full=LysM domain receptor-like kinase 3 {ECO:0000303|PubMed:12947035};^Eukaryota; Viridiplantae; Streptophyta; Embryophyta; Tracheophyta; Spermatophyta; Magnoliopsida; eudicotyledons; Gunneridae; Pentapetalae; rosids; fabids; Fabales; Fabaceae; Papilionoideae; 50 kb inversion clade; NPAAA clade; Hologalegina; IRL clade; Trifolieae; M…	0.0669917	1.371	0.370998	0.540923	-0.629002	1.32519	1.45846	1.12589	-0.459077	-0.16957	0.371899	0.540923	0.706567	0.458461	-3.629	-0.821647	-2.629
1	Nsylvestris_NODE_10608_length_2036_cov_88	BAM1_ARATH^BAM1_ARATH^Q:77-1765,H:1-573^72.213%ID^E:0^RecName: Full=Beta-amylase 1, chloroplastic;^Eukaryota; Viridiplantae; Streptophyta; Embryophyta; Tracheophyta; Spermatophyta; Magnoliopsida; eudicotyledons; Gunneridae; Pentapetalae; rosids; malvids; Brassicales; Brassicaceae; Camelineae; Arabidopsis	1.42218	2.53856	1.24153	2.00419	0.578796	1.38655	1.79298	1.79298	1.07816	0.865586	0.994235	0.461297	0.0239821	0.59117	-5.59073	-5.59073	-5.59073
1	Nsylvestris_NODE_10609_length_2036_cov_69	FBL42_ARATH^FBL42_ARATH^Q:303-1001,H:32-260^28.631%ID^E:5.78e-24^RecName: Full=F-box/LRR-repeat protein At3g03360;^Eukaryota; Viridiplantae; Streptophyta; Embryophyta; Tracheophyta; Spermatophyta; Magnoliopsida; eudicotyledons; Gunneridae; Pentapetalae; rosids; malvids; Brassicales; Brassicaceae; Camelineae; Arabidopsis`FBL42_ARATH^FBL42_ARATH^Q:1033-1476,H:269-403^27.451%ID^E:5.78e-24^RecName: F…	1.11223	1.5847	-0.587702	0.705909	0.0390185	2.06008	2.57551	1.41099	-0.114872	-2.46348	0.134248	1.44853	1.58818	0.651995	-3.04844	-4.04844	-3.04844
1	Nsylvestris_NODE_10612_length_2035_cov_224	C93A3_SOYBN^C93A3_SOYBN^Q:229-1725,H:3-505^38.462%ID^E:3.83e-111^RecName: Full=Cytochrome P450 93A3;^Eukaryota; Viridiplantae; Streptophyta; Embryophyta; Tracheophyta; Spermatophyta; Magnoliopsida; eudicotyledons; Gunneridae; Pentapetalae; rosids; fabids; Fabales; Fabaceae; Papilionoideae; 50 kb inversion clade; NPAAA clade; indigoferoid/millettioid clade; Phaseoleae; Glycine; Soja	-0.0169542	1.16828	0.188195	0.107956	-0.412924	1.44108	1.1128	1.68453	0.735185	-0.0191786	0.626792	0.258879	-0.145185	-0.060366	-1.99794	-1.88485	-2.78629
1	Nsylvestris_NODE_10615_length_2035_cov_199	.	1.02857	1.41665	0.659896	1.25314	-0.0759263	2.25828	2.0943	1.86297	1.891	0.0918928	1.15319	1.28778	1.48794	0.572073	-5.66059	-5.66059	-5.66059
1	Nsylvestris_NODE_10618_length_2035_cov_79	.	0.653973	1.38516	0.0101173	0.436382	0.868098	1.62483	1.15986	1.54928	1.80453	0.738038	1.3139	1.40243	0.765005	1.25804	-4.98988	-4.98988	-4.98988
1	Nsylvestris_NODE_1062_length_4866_cov_138	M3K5G_ARATH^M3K5G_ARATH^Q:2778-4109,H:184-646^59.188%ID^E:1.53e-164^RecName: Full=Mitogen-activated protein kinase kinase kinase 5 {ECO:0000303|PubMed:27679653};^Eukaryota; Viridiplantae; Streptophyta; Embryophyta; Tracheophyta; Spermatophyta; Magnoliopsida; eudicotyledons; Gunneridae; Pentapetalae; rosids; malvids; Brassicales; Brassicaceae; Camelineae; Arabidopsis	-0.44365	0.917689	0.0178891	0.3589	1.12027	1.71318	0.889659	0.845574	0.772497	0.550105	-0.686264	1.4223	0.00830304	0.774433	-2.97659	-1.48118	-3.80311
1	Nsylvestris_NODE_10620_length_2035_cov_22	CB60D_ARATH^CB60D_ARATH^Q:1982-327,H:2-586^35.285%ID^E:2.19e-99^RecName: Full=Calmodulin-binding protein 60 D {ECO:0000303|PubMed:11782485};^Eukaryota; Viridiplantae; Streptophyta; Embryophyta; Tracheophyta; Spermatophyta; Magnoliopsida; eudicotyledons; Gunneridae; Pentapetalae; rosids; malvids; Brassicales; Brassicaceae; Camelineae; Arabidopsis	-0.618185	0.442653	1.30411	0.866084	-1.45006	3.21119	1.86608	1.60883	-0.673256	0.147668	-0.713096	1.77388	0.191484	0.323935	-2.21127	-3.03502	-3.03502
1	Nsylvestris_NODE_10621_length_2035_cov_17	PP271_ARATH^PP271_ARATH^Q:824-1993,H:292-686^48.608%ID^E:1.18e-130^RecName: Full=Putative pentatricopeptide repeat-containing protein At3g49142;^Eukaryota; Viridiplantae; Streptophyta; Embryophyta; Tracheophyta; Spermatophyta; Magnoliopsida; eudicotyledons; Gunneridae; Pentapetalae; rosids; malvids; Brassicales; Brassicaceae; Camelineae; Arabidopsis`PP271_ARATH^PP271_ARATH^Q:285-794,H:43-213^31.5…	0.750238	1.41985	0.0975057	0.99059	-0.709849	1.71642	1.81371	2.09751	1.29015	0.290151	0.197041	-2.70985	-1.15895	-0.539924	-1.70985	-1.12489	-2.70985
1	Nsylvestris_NODE_10622_length_2034_cov_222	AGM1_ARATH^AGM1_ARATH^Q:1928-264,H:1-554^66.252%ID^E:0^RecName: Full=Phosphoacetylglucosamine mutase;^Eukaryota; Viridiplantae; Streptophyta; Embryophyta; Tracheophyta; Spermatophyta; Magnoliopsida; eudicotyledons; Gunneridae; Pentapetalae; rosids; malvids; Brassicales; Brassicaceae; Camelineae; Arabidopsis	0.664364	1.55225	0.505645	0.98325	0.00423241	1.57484	1.85467	2.16761	0.656322	0.137822	0.393252	0.717221	0.33932	0.206256	-3.83555	-4.18941	-3.73208
1	Nsylvestris_NODE_10625_length_2034_cov_134	MFSD5_MOUSE^MFSD5_MOUSE^Q:1641-739,H:76-379^23.27%ID^E:1.25e-06^RecName: Full=Molybdate-anion transporter;^Eukaryota; Metazoa; Chordata; Craniata; Vertebrata; Euteleostomi; Mammalia; Eutheria; Euarchontoglires; Glires; Rodentia; Myomorpha; Muroidea; Muridae; Murinae; Mus; Mus	-0.469541	0.788586	-0.31106	-0.146816	-0.488653	1.24853	1.54978	1.27628	0.788842	-0.282534	0.426674	0.240221	0.53413	-0.311609	-1.57201	-1.84084	-1.42997
1	Nsylvestris_NODE_10627_length_2034_cov_79	PYL5_ORYSJ^PYL5_ORYSJ^Q:1743-1603,H:38-84^76.596%ID^E:6.18e-28^RecName: Full=Abscisic acid receptor PYL5 {ECO:0000305};^Eukaryota; Viridiplantae; Streptophyta; Embryophyta; Tracheophyta; Spermatophyta; Magnoliopsida; Liliopsida; Poales; Poaceae; BOP clade; Oryzoideae; Oryzeae; Oryzinae; Oryza; Oryza sativa`PYL5_ORYSJ^PYL5_ORYSJ^Q:1601-1455,H:83-132^66%ID^E:6.18e-28^RecName: Full=Abscisic acid rec…	-0.156209	0.313276	-0.0237592	0.143351	0.120631	0.871271	1.30322	0.713206	1.01372	0.0259939	1.05995	0.447132	0.552742	-0.397218	-1.72325	-1.76072	-2.50333
1	Nsylvestris_NODE_10634_length_2033_cov_167	.	-0.481728	0.660227	-0.292868	-0.0206111	-0.577873	1.40532	0.632086	0.511266	1.04003	0.314292	0.968363	0.914831	0.713583	0.68862	-2.62959	-1.57543	-2.27052
1	Nsylvestris_NODE_10635_length_2033_cov_158	.	0.921647	1.30248	1.0503	0.47414	0.15158	2.03558	1.69209	1.66848	1.3721	-0.292478	1.07025	0.848092	1.19437	0.595877	-5.84707	-3.3011	-4.93633
1	Nsylvestris_NODE_10637_length_2033_cov_65	.	0.271371	0.639103	0.361569	0.446458	0.776606	1.77661	2.4257	2.17516	1.4871	0.776606	0.4871	1.82497	0.639103	-0.0389692	-4.68283	-4.68283	-4.68283
1	Nsylvestris_NODE_10641_length_2032_cov_188	TBB8_ARATH^TBB8_ARATH^Q:1561-284,H:1-426^98.592%ID^E:0^RecName: Full=Tubulin beta-8 chain;^Eukaryota; Viridiplantae; Streptophyta; Embryophyta; Tracheophyta; Spermatophyta; Magnoliopsida; eudicotyledons; Gunneridae; Pentapetalae; rosids; malvids; Brassicales; Brassicaceae; Camelineae; Arabidopsis	0.74031	2.71815	0.623152	0.716341	0.717352	1.76073	1.68621	1.71932	1.15503	-0.49945	0.720562	0.725136	-0.170155	-1.20211	-2.49924	-5.43414	-3.47721
1	Nsylvestris_NODE_10643_length_2032_cov_94	MRG1_ARATH^MRG1_ARATH^Q:488-3,H:4-161^66.258%ID^E:4.52e-65^RecName: Full=Protein MRG1 {ECO:0000303|PubMed:25211338};^Eukaryota; Viridiplantae; Streptophyta; Embryophyta; Tracheophyta; Spermatophyta; Magnoliopsida; eudicotyledons; Gunneridae; Pentapetalae; rosids; malvids; Brassicales; Brassicaceae; Camelineae; Arabidopsis	0.113921	0.782806	-0.431533	0.282559	0.0886514	0.819061	0.916304	0.328901	0.570707	0.0164091	0.465368	0.448788	0.743327	-0.285058	-1.31401	-1.35464	-2.19156
1	Nsylvestris_NODE_10645_length_2032_cov_42	.	0.892358	1.04436	-1.27757	0.0842013	-0.277567	2.49643	1.72243	-0.277567	1.77728	0.529788	0.044361	-0.692605	0.722433	0.044361	-2.27757	-2.27757	-2.27757
1	Nsylvestris_NODE_10647_length_2032_cov_22	PP280_ARATH^PP280_ARATH^Q:248-1897,H:167-716^34.539%ID^E:2.76e-111^RecName: Full=Pentatricopeptide repeat-containing protein At3g53360, mitochondrial;^Eukaryota; Viridiplantae; Streptophyta; Embryophyta; Tracheophyta; Spermatophyta; Magnoliopsida; eudicotyledons; Gunneridae; Pentapetalae; rosids; malvids; Brassicales; Brassicaceae; Camelineae; Arabidopsis`PP280_ARATH^PP280_ARATH^Q:260-1696,H:70-5…	0.601133	1.05761	-0.665991	-1.40007	-0.177676	1.82232	1.40729	1.3369	0.505539	1.49653	-0.12705	0.475712	1.34409	1.27875	-2.98503	-2.98503	-2.98503
1	Nsylvestris_NODE_10648_length_2031_cov_229	U2AFB_ARATH^U2AFB_ARATH^Q:1-372,H:62-185^82.258%ID^E:9.61e-54^RecName: Full=Splicing factor U2af small subunit B;^Eukaryota; Viridiplantae; Streptophyta; Embryophyta; Tracheophyta; Spermatophyta; Magnoliopsida; eudicotyledons; Gunneridae; Pentapetalae; rosids; malvids; Brassicales; Brassicaceae; Camelineae; Arabidopsis	-0.221094	0.634309	-0.214287	0.0924792	-0.785853	0.676976	1.63875	0.825536	0.713782	0.210121	0.194965	0.246458	-0.0813197	0.10637	-1.00012	-0.805863	-2.23121
1	Nsylvestris_NODE_10649_length_2031_cov_222	VPE_CITSI^VPE_CITSI^Q:1913-444,H:1-494^76.056%ID^E:0^RecName: Full=Vacuolar-processing enzyme;^Eukaryota; Viridiplantae; Streptophyta; Embryophyta; Tracheophyta; Spermatophyta; Magnoliopsida; eudicotyledons; Gunneridae; Pentapetalae; rosids; malvids; Sapindales; Rutaceae; Aurantioideae; Citrus	-0.161994	0.559092	0.0845887	0.454559	0.0144999	0.733433	1.73698	1.10413	0.839367	0.275238	1.44493	0.362554	0.309399	0.269096	-2.65394	-2.91727	-2.45466
1	Nsylvestris_NODE_1065_length_4865_cov_57	PPR56_ARATH^PPR56_ARATH^Q:4864-3545,H:282-718^50.794%ID^E:3.34e-139^RecName: Full=Pentatricopeptide repeat-containing protein At1g22960, mitochondrial;^Eukaryota; Viridiplantae; Streptophyta; Embryophyta; Tracheophyta; Spermatophyta; Magnoliopsida; eudicotyledons; Gunneridae; Pentapetalae; rosids; malvids; Brassicales; Brassicaceae; Camelineae; Arabidopsis`PPR56_ARATH^PPR56_ARATH^Q:4762-3608,H:17…	0.739174	1.88588	0.181548	0.485223	-0.194783	1.41633	1.89222	1.82624	1.36424	0.55411	0.690349	0.634233	0.782845	0.954648	-4.19332	-3.198	-5.82093
1	Nsylvestris_NODE_10653_length_2031_cov_177	Y4744_ARATH^Y4744_ARATH^Q:331-1485,H:5-383^53.846%ID^E:6.49e-134^RecName: Full=Uncharacterized protein At4g06744;^Eukaryota; Viridiplantae; Streptophyta; Embryophyta; Tracheophyta; Spermatophyta; Magnoliopsida; eudicotyledons; Gunneridae; Pentapetalae; rosids; malvids; Brassicales; Brassicaceae; Camelineae; Arabidopsis	0.375524	1.03393	1.28666	1.85557	0.797107	2.49343	2.45161	2.95909	0.423041	-0.761384	-0.898887	0.637166	0.423041	-0.41346	-4.22082	-4.22082	-4.22082
1	Nsylvestris_NODE_10658_length_2031_cov_39	SSY4_ARATH^SSY4_ARATH^Q:1760-285,H:542-1027^44%ID^E:8.91e-127^RecName: Full=Probable starch synthase 4, chloroplastic/amyloplastic {ECO:0000305};^Eukaryota; Viridiplantae; Streptophyta; Embryophyta; Tracheophyta; Spermatophyta; Magnoliopsida; eudicotyledons; Gunneridae; Pentapetalae; rosids; malvids; Brassicales; Brassicaceae; Camelineae; Arabidopsis	0.427975	1.65764	-0.138551	-1.33447	-1.76533	0.776561	1.53163	1.88248	1.55518	0.245236	1.46537	0.0620873	0.926376	0.068053	-2.7939	-1.77242	-2.7939
1	Nsylvestris_NODE_10659_length_2030_cov_223	.	0.732814	2.02201	1.09309	1.16936	0.862757	0.920432	0.620464	1.36719	1.34952	0.431367	0.996825	0.497575	0.560878	0.248399	-5.45391	-3.04049	-4.37829
1	Nsylvestris_NODE_10664_length_2030_cov_104	WRK44_ARATH^WRK44_ARATH^Q:1772-447,H:1-405^40.217%ID^E:1.77e-83^RecName: Full=WRKY transcription factor 44;^Eukaryota; Viridiplantae; Streptophyta; Embryophyta; Tracheophyta; Spermatophyta; Magnoliopsida; eudicotyledons; Gunneridae; Pentapetalae; rosids; malvids; Brassicales; Brassicaceae; Camelineae; Arabidopsis`WRK44_ARATH^WRK44_ARATH^Q:656-435,H:152-224^50%ID^E:5.09e-14^RecName: Full=WRKY tran…	-0.95292	-0.0392836	0.490808	-0.936455	-0.402168	1.56677	0.333384	-0.0536389	1.31244	1.42384	0.692839	0.705353	1.76036	-0.904079	-1.7326	-1.12881	-2.13584
1	Nsylvestris_NODE_1067_length_4859_cov_230	RENT1_ARATH^RENT1_ARATH^Q:4642-911,H:1-1228^79.153%ID^E:0^RecName: Full=Regulator of nonsense transcripts 1 homolog;^Eukaryota; Viridiplantae; Streptophyta; Embryophyta; Tracheophyta; Spermatophyta; Magnoliopsida; eudicotyledons; Gunneridae; Pentapetalae; rosids; malvids; Brassicales; Brassicaceae; Camelineae; Arabidopsis	0.698582	1.6781	0.332586	0.388717	-0.493426	1.45835	1.47412	1.49143	1.3399	0.149309	1.12745	0.450984	0.515643	0.296151	-3.86217	-3.62154	-3.42418
1	Nsylvestris_NODE_10671_length_2029_cov_215	.	0.88604	1.32774	1.16813	1.06159	0.326785	1.26934	1.12004	0.715876	1.09365	-1.17274	0.602058	0.322394	0.790645	0.539413	-3.7397	-3.37838	-2.93288
1	Nsylvestris_NODE_10676_length_2029_cov_78	SH3P2_ARATH^SH3P2_ARATH^Q:1866-1444,H:1-140^81.56%ID^E:4.43e-64^RecName: Full=SH3 domain-containing protein 2 {ECO:0000312|EMBL:AAL32439.1};^Eukaryota; Viridiplantae; Streptophyta; Embryophyta; Tracheophyta; Spermatophyta; Magnoliopsida; eudicotyledons; Gunneridae; Pentapetalae; rosids; malvids; Brassicales; Brassicaceae; Camelineae; Arabidopsis	-0.247604	0.865892	0.0381975	0.68484	-0.598632	1.1997	1.01006	1.58971	0.784219	-0.107382	0.242519	-0.432573	0.163462	-0.724198	-0.81265	-2.06036	-1.5952
1	Nsylvestris_NODE_1068_length_4859_cov_121	HNRPQ_HUMAN^HNRPQ_HUMAN^Q:3115-3549,H:278-414^33.108%ID^E:5.55e-14^RecName: Full=Heterogeneous nuclear ribonucleoprotein Q;^Eukaryota; Metazoa; Chordata; Craniata; Vertebrata; Euteleostomi; Mammalia; Eutheria; Euarchontoglires; Primates; Haplorrhini; Catarrhini; Hominidae; Homo	0.188231	1.06869	0.0882953	0.00635305	-0.59568	0.989749	0.852576	1.08364	0.964117	0.107678	0.789823	0.295564	0.392164	0.167221	-2.24259	-1.58322	-2.57261
1	Nsylvestris_NODE_10683_length_2026_cov_40	.	0.203853	1.17348	-0.380209	0.625188	0.142452	1.57309	1.63815	1.42521	1.74735	1.04482	0.951598	1.1744	1.34708	0.476871	-4.38111	-4.38111	-4.38111
1	Nsylvestris_NODE_10686_length_2027_cov_189	NILP3_ARATH^NILP3_ARATH^Q:325-1320,H:38-369^80.422%ID^E:0^RecName: Full=Omega-amidase, chloroplastic;^Eukaryota; Viridiplantae; Streptophyta; Embryophyta; Tracheophyta; Spermatophyta; Magnoliopsida; eudicotyledons; Gunneridae; Pentapetalae; rosids; malvids; Brassicales; Brassicaceae; Camelineae; Arabidopsis	0.636523	1.52692	0.336956	0.758082	-0.0383182	1.40911	1.35225	0.798283	0.36754	-0.425303	0.233271	-0.226761	0.250744	-0.0274246	-1.97626	-2.73559	-2.24002
1	Nsylvestris_NODE_10692_length_2027_cov_14	RNHX1_ARATH^RNHX1_ARATH^Q:575-979,H:1-135^38.519%ID^E:6.75e-29^RecName: Full=Putative ribonuclease H protein At1g65750;^Eukaryota; Viridiplantae; Streptophyta; Embryophyta; Tracheophyta; Spermatophyta; Magnoliopsida; eudicotyledons; Gunneridae; Pentapetalae; rosids; malvids; Brassicales; Brassicaceae; Camelineae; Arabidopsis`RNHX1_ARATH^RNHX1_ARATH^Q:1448-1594,H:293-341^32.653%ID^E:6.75e-29^RecNa…	0.532337	1.46591	0.244433	-0.342132	-0.605166	1.32083	0.981718	0.394834	0.978834	0.0692942	0.904783	0.625037	0.970146	-0.344539	-1.34213	-2.92709	-2.92709
1	Nsylvestris_NODE_10698_length_2026_cov_40	ALMT9_ARATH^ALMT9_ARATH^Q:234-1796,H:31-573^49.27%ID^E:4.67e-153^RecName: Full=Aluminum-activated malate transporter 9;^Eukaryota; Viridiplantae; Streptophyta; Embryophyta; Tracheophyta; Spermatophyta; Magnoliopsida; eudicotyledons; Gunneridae; Pentapetalae; rosids; malvids; Brassicales; Brassicaceae; Camelineae; Arabidopsis	-0.0233248	0.1466	0.1466	-2.02332	-0.21597	2.02107	1.56164	0.1466	0.677115	1.1466	2.7046	-1.43836	0.436107	-0.21597	-0.0233248	-2.02332	-3.02332
1	Nsylvestris_NODE_107_length_8362_cov_49	ATR_ARATH^ATR_ARATH^Q:8351-882,H:237-2702^63%ID^E:0^RecName: Full=Serine/threonine-protein kinase ATR;^Eukaryota; Viridiplantae; Streptophyta; Embryophyta; Tracheophyta; Spermatophyta; Magnoliopsida; eudicotyledons; Gunneridae; Pentapetalae; rosids; malvids; Brassicales; Brassicaceae; Camelineae; Arabidopsis	0.954318	1.98419	-0.731492	-0.709633	0.236109	1.9741	1.79455	1.84577	1.10769	-0.334082	0.908796	0.266504	1.43163	0.214965	-3.48288	-2.88005	-4.58049
1	Nsylvestris_NODE_10705_length_2024_cov_232	SCD1_ARATH^SCD1_ARATH^Q:1738-2,H:1-570^71.503%ID^E:0^RecName: Full=DENN domain and WD repeat-containing protein SCD1 {ECO:0000305};^Eukaryota; Viridiplantae; Streptophyta; Embryophyta; Tracheophyta; Spermatophyta; Magnoliopsida; eudicotyledons; Gunneridae; Pentapetalae; rosids; malvids; Brassicales; Brassicaceae; Camelineae; Arabidopsis	0.0293461	1.24535	0.156978	0.731093	0.25924	1.1989	0.683872	0.941345	1.21634	-0.555542	0.591387	-0.197672	0.474417	-0.0574617	-2.81364	-1.8645	-2.03944
1	Nsylvestris_NODE_10708_length_2022_cov_208	NFRKB_HUMAN^NFRKB_HUMAN^Q:398-1117,H:445-651^38.843%ID^E:6.43e-42^RecName: Full=Nuclear factor related to kappa-B-binding protein;^Eukaryota; Metazoa; Chordata; Craniata; Vertebrata; Euteleostomi; Mammalia; Eutheria; Euarchontoglires; Primates; Haplorrhini; Catarrhini; Hominidae; Homo	1.25188	1.67824	0.927479	0.445345	1.26646	2.53025	1.83883	2.02577	1.50531	0.257551	1.13799	0.240764	0.882001	0.0311792	-5.33968	-5.33968	-5.33968
1	Nsylvestris_NODE_1071_length_4854_cov_182	SUS1_SOLTU^SUS1_SOLTU^Q:2698-284,H:1-805^94.658%ID^E:0^RecName: Full=Sucrose synthase;^Eukaryota; Viridiplantae; Streptophyta; Embryophyta; Tracheophyta; Spermatophyta; Magnoliopsida; eudicotyledons; Gunneridae; Pentapetalae; asterids; lamiids; Solanales; Solanaceae; Solanoideae; Solaneae; Solanum	0.773469	1.66871	0.164137	0.146589	-0.408781	1.81986	1.6397	1.6252	1.2226	0.00747771	0.785548	0.412728	0.360044	0.207708	-3.63194	-3.67335	-3.11969
1	Nsylvestris_NODE_10720_length_2023_cov_147	NFD4_ARATH^NFD4_ARATH^Q:163-750,H:43-238^38.693%ID^E:1.1e-28^RecName: Full=Protein NUCLEAR FUSION DEFECTIVE 4 {ECO:0000303|PubMed:16698901};^Eukaryota; Viridiplantae; Streptophyta; Embryophyta; Tracheophyta; Spermatophyta; Magnoliopsida; eudicotyledons; Gunneridae; Pentapetalae; rosids; malvids; Brassicales; Brassicaceae; Camelineae; Arabidopsis`NFD4_ARATH^NFD4_ARATH^Q:1057-1740,H:345-575^27.35%I…	-0.0738996	0.854818	-0.591839	1.19992	-0.517372	1.40424	1.64488	1.75331	-0.576277	0.289861	-0.794014	0.705388	-0.283149	-0.245507	-1.79263	-1.12436	-1.85337
1	Nsylvestris_NODE_10721_length_2023_cov_122	COX15_ARATH^COX15_ARATH^Q:377-1180,H:54-317^82.09%ID^E:2.62e-152^RecName: Full=Cytochrome c oxidase assembly protein COX15;^Eukaryota; Viridiplantae; Streptophyta; Embryophyta; Tracheophyta; Spermatophyta; Magnoliopsida; eudicotyledons; Gunneridae; Pentapetalae; rosids; malvids; Brassicales; Brassicaceae; Camelineae; Arabidopsis`COX15_ARATH^COX15_ARATH^Q:1234-1356,H:316-356^82.927%ID^E:6.77e-14^R…	0.0731938	0.990015	-0.379318	-0.27509	-1.43219	1.22629	2.02388	1.37895	0.888936	0.0295072	0.897116	-0.618074	-0.0425902	-0.472531	-0.763692	-1.44106	-2.08335
1	Nsylvestris_NODE_10723_length_2023_cov_62	BUB1_ARATH^BUB1_ARATH^Q:1888-350,H:13-525^59.923%ID^E:0^RecName: Full=Mitotic checkpoint serine/threonine-protein kinase BUB1;^Eukaryota; Viridiplantae; Streptophyta; Embryophyta; Tracheophyta; Spermatophyta; Magnoliopsida; eudicotyledons; Gunneridae; Pentapetalae; rosids; malvids; Brassicales; Brassicaceae; Camelineae; Arabidopsis	0.11556	1.04977	-0.448124	0.051339	0.826773	1.72	1.54597	0.719999	2.27336	1.17082	0.898641	-0.0478989	-0.223418	-1.40887	-2.38329	-2.12119	-3.73943
1	Nsylvestris_NODE_10725_length_2023_cov_36	PP184_ARATH^PP184_ARATH^Q:39-1883,H:1-614^52.174%ID^E:0^RecName: Full=Pentatricopeptide repeat-containing protein At2g34400;^Eukaryota; Viridiplantae; Streptophyta; Embryophyta; Tracheophyta; Spermatophyta; Magnoliopsida; eudicotyledons; Gunneridae; Pentapetalae; rosids; malvids; Brassicales; Brassicaceae; Camelineae; Arabidopsis	0.694997	1.99311	0.141668	0.075173	-0.980322	1.31175	1.3535	2.58566	1.07063	0.740524	0.332146	-1.54655	1.03609	0.728074	-3.17882	-3.17882	-3.17882
1	Nsylvestris_NODE_10731_length_2022_cov_130	RH52B_ORYSJ^RH52B_ORYSJ^Q:1910-585,H:147-589^69.128%ID^E:0^RecName: Full=DEAD-box ATP-dependent RNA helicase 52B;^Eukaryota; Viridiplantae; Streptophyta; Embryophyta; Tracheophyta; Spermatophyta; Magnoliopsida; Liliopsida; Poales; Poaceae; BOP clade; Oryzoideae; Oryzeae; Oryzinae; Oryza; Oryza sativa	0.153035	1.69959	-0.24162	0.0340445	-0.991327	1.56465	0.957756	1.20752	-0.332287	-0.915408	-0.427461	0.190955	0.228403	0.00809091	-1.91872	0.0572915	-1.27451
1	Nsylvestris_NODE_10735_length_2022_cov_23	.	1.12355	2.21666	0.676088	-0.783344	0.216656	1.74022	2.50206	1.30412	0.216656	0.386581	-1.19838	0.0240111	-1.19838	1.12355	-2.78334	-2.78334	-2.78334
1	Nsylvestris_NODE_10736_length_2021_cov_219	PLY3_ARATH^PLY3_ARATH^Q:1797-490,H:14-459^55.804%ID^E:3.28e-151^RecName: Full=Probable pectate lyase 3;^Eukaryota; Viridiplantae; Streptophyta; Embryophyta; Tracheophyta; Spermatophyta; Magnoliopsida; eudicotyledons; Gunneridae; Pentapetalae; rosids; malvids; Brassicales; Brassicaceae; Camelineae; Arabidopsis	0.926465	4.28356	1.44219	-0.226512	1.56716	0.324846	-3.49319	-0.911707	1.55713	-3.11725	0.313568	1.30025	-0.216152	-0.503653	-0.746667	-0.954839	-1.54519
1	Nsylvestris_NODE_10743_length_2021_cov_35	FB250_ARATH^FB250_ARATH^Q:682-1029,H:136-244^36.441%ID^E:2.37e-19^RecName: Full=F-box protein At5g03100;^Eukaryota; Viridiplantae; Streptophyta; Embryophyta; Tracheophyta; Spermatophyta; Magnoliopsida; eudicotyledons; Gunneridae; Pentapetalae; rosids; malvids; Brassicales; Brassicaceae; Camelineae; Arabidopsis`FB250_ARATH^FB250_ARATH^Q:272-598,H:4-108^36.364%ID^E:2.37e-19^RecName: Full=F-box prot…	1.06587	1.47911	-0.296697	0.593055	-0.29876	1.95988	2.06587	0.802839	1.21788	-1.10766	0.479708	1.06587	0.219318	0.065873	-3.10405	-3.10405	-3.10405
1	Nsylvestris_NODE_10746_length_2020_cov_154	.	1.01675	2.42406	2.03613	2.40409	1.45277	2.13846	1.88196	1.20177	0.400624	-1.39593	0.16728	0.757161	-0.95552	0.438277	-4.65596	-4.65596	-4.65596
1	Nsylvestris_NODE_10747_length_2020_cov_97	DOF57_ARATH^DOF57_ARATH^Q:221-445,H:33-106^76%ID^E:4.71e-32^RecName: Full=Dof zinc finger protein DOF5.7;^Eukaryota; Viridiplantae; Streptophyta; Embryophyta; Tracheophyta; Spermatophyta; Magnoliopsida; eudicotyledons; Gunneridae; Pentapetalae; rosids; malvids; Brassicales; Brassicaceae; Camelineae; Arabidopsis	-1.05321	0.531753	-0.712173	0.209825	-0.00590401	2.30669	2.65461	1.30669	2.49111	1.65461	1.74034	1.30669	1.98312	0.466164	-4.9601	-4.9601	-4.9601
1	Nsylvestris_NODE_10749_length_2020_cov_56	JASON_ARATH^JASON_ARATH^Q:261-1733,H:29-470^36.419%ID^E:1.04e-55^RecName: Full=Protein JASON {ECO:0000305};^Eukaryota; Viridiplantae; Streptophyta; Embryophyta; Tracheophyta; Spermatophyta; Magnoliopsida; eudicotyledons; Gunneridae; Pentapetalae; rosids; malvids; Brassicales; Brassicaceae; Camelineae; Arabidopsis	1.16712	2.11821	0.846391	1.34769	0.067582	2.26023	1.06758	1.96067	0.582155	-2.73977	0.067582	-0.739773	0.960667	-1.747	-1.73977	-2.73977	-2.73977
1	Nsylvestris_NODE_1075_length_4848_cov_117	PPA27_ARATH^PPA27_ARATH^Q:3551-2604,H:296-611^81.646%ID^E:1.68e-169^RecName: Full=Probable inactive purple acid phosphatase 27;^Eukaryota; Viridiplantae; Streptophyta; Embryophyta; Tracheophyta; Spermatophyta; Magnoliopsida; eudicotyledons; Gunneridae; Pentapetalae; rosids; malvids; Brassicales; Brassicaceae; Camelineae; Arabidopsis	0.246895	0.794745	-0.258942	-0.16194	-0.565478	1.32606	1.69507	1.50566	0.976777	-0.145744	1.02001	0.353057	0.52734	-0.114729	-2.57427	-2.0612	-2.56333
1	Nsylvestris_NODE_10752_length_2019_cov_108	AIRP2_ARATH^AIRP2_ARATH^Q:359-925,H:4-192^70.37%ID^E:1.15e-77^RecName: Full=E3 ubiquitin-protein ligase AIRP2 {ECO:0000305};^Eukaryota; Viridiplantae; Streptophyta; Embryophyta; Tracheophyta; Spermatophyta; Magnoliopsida; eudicotyledons; Gunneridae; Pentapetalae; rosids; malvids; Brassicales; Brassicaceae; Camelineae; Arabidopsis`AIRP2_ARATH^AIRP2_ARATH^Q:1447-1620,H:174-231^62.069%ID^E:2.21e-17^…	0.280366	0.838157	-0.188999	0.367299	-0.315195	1.13611	0.89088	0.549084	0.776843	-0.0511051	1.036	-0.656138	-0.315664	-0.191151	-1.78605	-0.370203	-2.00023
1	Nsylvestris_NODE_10755_length_2019_cov_55	PARG1_ARATH^PARG1_ARATH^Q:1957-290,H:1-545^57.271%ID^E:0^RecName: Full=Poly(ADP-ribose) glycohydrolase 1;^Eukaryota; Viridiplantae; Streptophyta; Embryophyta; Tracheophyta; Spermatophyta; Magnoliopsida; eudicotyledons; Gunneridae; Pentapetalae; rosids; malvids; Brassicales; Brassicaceae; Camelineae; Arabidopsis	0.394868	1.21489	-0.00739421	-0.268911	0.499566	1.9146	2.137	2.29927	1.02638	-0.586295	0.93845	0.915004	1.18596	1.10258	-4.25532	-4.25532	-4.25532
1	Nsylvestris_NODE_10756_length_2019_cov_37	ELP6_ARATH^ELP6_ARATH^Q:1885-1643,H:6-85^50.617%ID^E:4.89e-17^RecName: Full=Elongator complex protein 6;^Eukaryota; Viridiplantae; Streptophyta; Embryophyta; Tracheophyta; Spermatophyta; Magnoliopsida; eudicotyledons; Gunneridae; Pentapetalae; rosids; malvids; Brassicales; Brassicaceae; Camelineae; Arabidopsis	0.814514	1.81654	0.374501	0.922558	-0.829412	0.213657	1.03308	0.448122	0.480223	-0.22995	0.275941	0.0333248	-0.2196	-1.28884	-0.936933	-1.6927	-1.21502
1	Nsylvestris_NODE_10759_length_2018_cov_169	KLC3_PONAB^KLC3_PONAB^Q:1516-911,H:220-421^30.198%ID^E:6.97e-18^RecName: Full=Kinesin light chain 3;^Eukaryota; Metazoa; Chordata; Craniata; Vertebrata; Euteleostomi; Mammalia; Eutheria; Euarchontoglires; Primates; Haplorrhini; Catarrhini; Hominidae; Pongo`KLC3_PONAB^KLC3_PONAB^Q:1294-569,H:210-435^28.395%ID^E:8.68e-08^RecName: Full=Kinesin light chain 3;^Eukaryota; Metazoa; Chordata; Craniata; V…	0.435239	1.25984	-0.414353	0.362617	-0.199283	1.57746	1.48825	1.52822	0.881137	0.0112347	0.820038	0.323321	0.425682	0.575348	-3.58446	-2.67993	-2.81036
1	Nsylvestris_NODE_10761_length_2018_cov_99	ARP1_ARATH^ARP1_ARATH^Q:265-1020,H:5-249^46.097%ID^E:2.41e-52^RecName: Full=Probable RNA-binding protein ARP1;^Eukaryota; Viridiplantae; Streptophyta; Embryophyta; Tracheophyta; Spermatophyta; Magnoliopsida; eudicotyledons; Gunneridae; Pentapetalae; rosids; malvids; Brassicales; Brassicaceae; Camelineae; Arabidopsis	-0.160088	0.643617	1.23021	0.985231	-0.292188	1.51061	1.42249	1.87192	0.896182	-0.196836	0.361386	0.430598	1.04423	0.0509399	-2.93572	-3.46179	-3.40078
1	Nsylvestris_NODE_10763_length_2018_cov_72	CHI5_ARATH^CHI5_ARATH^Q:173-571,H:7-139^53.383%ID^E:6.77e-37^RecName: Full=Endochitinase EP3 {ECO:0000303|PubMed:11525512};^Eukaryota; Viridiplantae; Streptophyta; Embryophyta; Tracheophyta; Spermatophyta; Magnoliopsida; eudicotyledons; Gunneridae; Pentapetalae; rosids; malvids; Brassicales; Brassicaceae; Camelineae; Arabidopsis	0.0447851	0.64976	0.210735	0.861141	0.407355	1.48536	1.65247	1.1119	2.01002	0.822393	1.86153	0.406821	1.40709	0.111243	-4.34753	-4.34753	-4.34753
1	Nsylvestris_NODE_10765_length_2017_cov_222	CIPKE_ARATH^CIPKE_ARATH^Q:1583-429,H:10-391^65.285%ID^E:1.2e-163^RecName: Full=CBL-interacting serine/threonine-protein kinase 14;^Eukaryota; Viridiplantae; Streptophyta; Embryophyta; Tracheophyta; Spermatophyta; Magnoliopsida; eudicotyledons; Gunneridae; Pentapetalae; rosids; malvids; Brassicales; Brassicaceae; Camelineae; Arabidopsis	1.28497	2.02388	0.319506	1.95715	0.199924	1.36643	1.98936	2.34433	1.25691	0.92342	0.928511	0.159865	0.625368	0.452667	-5.27743	-5.27743	-5.27743
1	Nsylvestris_NODE_10766_length_2017_cov_212	SRK2E_ARATH^SRK2E_ARATH^Q:1685-711,H:1-324^84.923%ID^E:0^RecName: Full=Serine/threonine-protein kinase SRK2E {ECO:0000303|PubMed:12514244};^Eukaryota; Viridiplantae; Streptophyta; Embryophyta; Tracheophyta; Spermatophyta; Magnoliopsida; eudicotyledons; Gunneridae; Pentapetalae; rosids; malvids; Brassicales; Brassicaceae; Camelineae; Arabidopsis	0.605047	1.38311	-0.183689	0.581577	-0.346396	1.6538	1.73886	1.08697	1.71074	0.541175	1.23714	1.1586	0.747872	0.715972	-4.52865	-4.29612	-3.806
1	Nsylvestris_NODE_10769_length_2017_cov_155	PDF1_ARATH^PDF1_ARATH^Q:1434-1757,H:194-305^62.5%ID^E:4.26e-24^RecName: Full=Protodermal factor 1;^Eukaryota; Viridiplantae; Streptophyta; Embryophyta; Tracheophyta; Spermatophyta; Magnoliopsida; eudicotyledons; Gunneridae; Pentapetalae; rosids; malvids; Brassicales; Brassicaceae; Camelineae; Arabidopsis	0.689113	2.14597	0.264615	0.10415	-1.07642	0.54025	0.264615	1.01669	1.58654	1.16643	1.94742	1.79805	1.35654	1.14597	-2.98331	-4.98331	-4.98331
1	Nsylvestris_NODE_1077_length_4842_cov_82	POLR1_ARATH^POLR1_ARATH^Q:2103-1267,H:1171-1440^40.86%ID^E:4.13e-58^RecName: Full=Retrovirus-related Pol polyprotein from transposon RE1;^Eukaryota; Viridiplantae; Streptophyta; Embryophyta; Tracheophyta; Spermatophyta; Magnoliopsida; eudicotyledons; Gunneridae; Pentapetalae; rosids; malvids; Brassicales; Brassicaceae; Camelineae; Arabidopsis`POLR1_ARATH^POLR1_ARATH^Q:3210-2437,H:505-760^31.801%I…	0.709251	1.41552	0.461323	0.598827	0.0462857	2.19468	2.23215	1.20548	2.18924	0.739308	1.73931	1.32922	1.66296	1.05826	-5.8606	-5.8606	-5.8606
1	Nsylvestris_NODE_10770_length_2017_cov_99	PAE8_ARATH^PAE8_ARATH^Q:989-237,H:137-384^57.371%ID^E:4.03e-93^RecName: Full=Pectin acetylesterase 8 {ECO:0000303|PubMed:25115560};^Eukaryota; Viridiplantae; Streptophyta; Embryophyta; Tracheophyta; Spermatophyta; Magnoliopsida; eudicotyledons; Gunneridae; Pentapetalae; rosids; malvids; Brassicales; Brassicaceae; Camelineae; Arabidopsis	-0.625473	-0.623071	-1.21044	0.0571003	0.507652	2.82673	3.84528	2.85759	1.37633	-0.401021	-0.148659	0.250307	-0.0405105	-1.62547	-0.625473	-3.21044	-3.21044
1	Nsylvestris_NODE_10771_length_2017_cov_93	.	0.560059	1.56345	0.767242	0.770663	-0.19502	0.666546	1.187	1.21745	0.227007	0.254285	0.0605638	0.00171118	0.122852	0.138573	-2.35544	-2.81575	-2.1712
1	Nsylvestris_NODE_10772_length_2017_cov_85	PP392_ARATH^PP392_ARATH^Q:1704-244,H:21-505^54.004%ID^E:0^RecName: Full=Pentatricopeptide repeat-containing protein At5g18475;^Eukaryota; Viridiplantae; Streptophyta; Embryophyta; Tracheophyta; Spermatophyta; Magnoliopsida; eudicotyledons; Gunneridae; Pentapetalae; rosids; malvids; Brassicales; Brassicaceae; Camelineae; Arabidopsis	0.346888	0.884005	0.44854	0.563562	-0.669089	1.66153	1.46536	1.50659	0.428517	0.890404	0.118392	0.17753	0.399266	0.408865	-2.76149	-2.57621	-3.29266
1	Nsylvestris_NODE_10774_length_2017_cov_43	WTF1_ARATH^WTF1_ARATH^Q:1629-643,H:84-416^31.751%ID^E:5.89e-44^RecName: Full=Protein WHAT'S THIS FACTOR 1 homolog, chloroplastic {ECO:0000305};^Eukaryota; Viridiplantae; Streptophyta; Embryophyta; Tracheophyta; Spermatophyta; Magnoliopsida; eudicotyledons; Gunneridae; Pentapetalae; rosids; malvids; Brassicales; Brassicaceae; Camelineae; Arabidopsis	0.141767	1.55292	0.516024	-0.296385	-0.849539	1.45417	1.86608	0.937588	1.69175	-0.276827	0.869011	0.668401	1.09749	0.71473	-3.7545	-2.57818	-3.7545
1	Nsylvestris_NODE_10775_length_2016_cov_209	PS10B_ARATH^PS10B_ARATH^Q:165-1358,H:1-399^92.481%ID^E:0^RecName: Full=26S proteasome regulatory subunit S10B homolog B;^Eukaryota; Viridiplantae; Streptophyta; Embryophyta; Tracheophyta; Spermatophyta; Magnoliopsida; eudicotyledons; Gunneridae; Pentapetalae; rosids; malvids; Brassicales; Brassicaceae; Camelineae; Arabidopsis	0.604601	1.61737	0.440349	0.700813	-0.276977	1.41069	1.19036	1.37939	0.0482588	-1.24951	-0.181102	-0.0274018	0.15324	-0.193097	-1.7196	-1.76364	-2.13374
1	Nsylvestris_NODE_10777_length_2016_cov_170	SIR4_ARATH^SIR4_ARATH^Q:369-1409,H:26-373^71.839%ID^E:5.5e-177^RecName: Full=NAD-dependent protein deacylase SRT2 {ECO:0000255|HAMAP-Rule:MF_03161};^Eukaryota; Viridiplantae; Streptophyta; Embryophyta; Tracheophyta; Spermatophyta; Magnoliopsida; eudicotyledons; Gunneridae; Pentapetalae; rosids; malvids; Brassicales; Brassicaceae; Camelineae; Arabidopsis	0.211179	1.08631	0.131218	-0.145371	-0.803179	1.75481	2.54402	2.30122	-0.00727624	0.00541213	0.833644	-0.423114	0.0501169	0.133565	-2.05516	-1.93857	-3.67882
1	Nsylvestris_NODE_1078_length_4841_cov_29	.	-0.133134	0.94971	0.236658	-0.826148	0.438703	0.756206	0.700595	0.169318	2.40246	0.947304	1.92321	1.48305	1.44835	1.13802	-4.80734	-3.58495	-3.24201
1	Nsylvestris_NODE_10782_length_2016_cov_80	.	0.363518	1.23711	0.959695	0.899404	0.697618	1.32769	1.9533	1.32769	1.0534	0.895238	0.620979	1.24018	1.1734	0.655545	-4.80159	-4.80159	-4.80159
1	Nsylvestris_NODE_10784_length_2016_cov_21	.	0.00936501	1.84587	1.1089	-0.213027	-0.476062	1.20201	1.1089	1.9569	1.52394	-0.101996	1.1089	-0.476062	1.00937	-1.21303	-2.79799	-2.79799	-2.79799
1	Nsylvestris_NODE_10785_length_2015_cov_218	MED13_ARATH^MED13_ARATH^Q:1-1614,H:1421-1921^59.598%ID^E:0^RecName: Full=Mediator of RNA polymerase II transcription subunit 13;^Eukaryota; Viridiplantae; Streptophyta; Embryophyta; Tracheophyta; Spermatophyta; Magnoliopsida; eudicotyledons; Gunneridae; Pentapetalae; rosids; malvids; Brassicales; Brassicaceae; Camelineae; Arabidopsis	0.517949	1.25755	0.580244	0.364235	-0.834889	1.1607	1.01231	1.22112	0.890004	-0.101143	0.921473	0.635546	0.422199	0.388925	-2.63766	-2.34306	-3.45551
1	Nsylvestris_NODE_10787_length_2015_cov_118	LPAT5_ARATH^LPAT5_ARATH^Q:503-1168,H:7-228^63.063%ID^E:9.11e-100^RecName: Full=Probable 1-acyl-sn-glycerol-3-phosphate acyltransferase 5;^Eukaryota; Viridiplantae; Streptophyta; Embryophyta; Tracheophyta; Spermatophyta; Magnoliopsida; eudicotyledons; Gunneridae; Pentapetalae; rosids; malvids; Brassicales; Brassicaceae; Camelineae; Arabidopsis	0.809544	1.19453	0.391313	0.181332	-1.0017	1.69146	1.52013	2.16879	0.67213	-0.154617	-0.181278	0.00367729	0.184955	-0.313839	-1.9198	-1.50986	-3.73676
1	Nsylvestris_NODE_10788_length_2015_cov_92	.	0.341748	0.993825	0.0368938	0.856322	-0.591137	1.3757	2.19736	1.40886	1.40886	0.408863	2.09918	0.0368938	1.30698	0.271359	-4.05057	-4.05057	-4.05057
1	Nsylvestris_NODE_10789_length_2015_cov_66	.	1.2169	1.89883	0.970488	0.828914	-0.297115	1.82636	1.32993	1.38056	1.04048	0.0845154	0.42127	0.726563	0.158913	0.824166	-4.47742	-4.47742	-3.45594
1	Nsylvestris_NODE_1079_length_4839_cov_117	RUK_ARATH^RUK_ARATH^Q:4570-479,H:1-1366^62.264%ID^E:0^RecName: Full=Serine/threonine-protein kinase RUNKEL {ECO:0000305};^Eukaryota; Viridiplantae; Streptophyta; Embryophyta; Tracheophyta; Spermatophyta; Magnoliopsida; eudicotyledons; Gunneridae; Pentapetalae; rosids; malvids; Brassicales; Brassicaceae; Camelineae; Arabidopsis	1.02304	2.23678	0.377393	0.430178	0.609974	2.59533	2.06808	1.93481	1.77152	-0.340748	1.06659	-0.478364	0.858607	0.904954	-5.01938	-5.01938	-5.01938
1	Nsylvestris_NODE_10790_length_2015_cov_66	PTR19_ARATH^PTR19_ARATH^Q:1961-237,H:1-581^65.758%ID^E:0^RecName: Full=Protein NRT1/ PTR FAMILY 4.6;^Eukaryota; Viridiplantae; Streptophyta; Embryophyta; Tracheophyta; Spermatophyta; Magnoliopsida; eudicotyledons; Gunneridae; Pentapetalae; rosids; malvids; Brassicales; Brassicaceae; Camelineae; Arabidopsis	1.05573	2.20054	0.73009	0.850184	0.69679	-0.361494	0.786921	0.482855	0.98613	-0.902894	0.955852	0.236122	-0.367607	0.441497	-1.651	-4.60333	-1.53638
1	Nsylvestris_NODE_10791_length_2015_cov_34	.	-0.102664	0.78291	-1.05536	0.0128129	-2.68763	2.65222	2.91229	1.9848	1.06512	0.955652	0.0172451	-0.355635	-0.233451	-1.37729	-1.3657	-2.10266	-1.10266
1	Nsylvestris_NODE_10796_length_2014_cov_116	YEK9_SCHPO^YEK9_SCHPO^Q:1620-2009,H:85-211^32.308%ID^E:6.58e-13^RecName: Full=Uncharacterized protein C4F10.09c;^Eukaryota; Fungi; Dikarya; Ascomycota; Taphrinomycotina; Schizosaccharomycetes; Schizosaccharomycetales; Schizosaccharomycetaceae; Schizosaccharomyces	0.853355	1.75645	1.05416	1.22182	0.529215	1.99327	1.60918	1.80825	1.49064	0.866557	0.860313	0.868114	0.624168	0.904506	-6.34484	-6.34484	-3.7503
1	Nsylvestris_NODE_10799_length_2014_cov_30	STA1_ARATH^STA1_ARATH^Q:1794-1597,H:938-1003^36.364%ID^E:2.4e-06^RecName: Full=Protein STABILIZED1;^Eukaryota; Viridiplantae; Streptophyta; Embryophyta; Tracheophyta; Spermatophyta; Magnoliopsida; eudicotyledons; Gunneridae; Pentapetalae; rosids; malvids; Brassicales; Brassicaceae; Camelineae; Arabidopsis`STA1_ARATH^STA1_ARATH^Q:1927-1841,H:878-906^37.931%ID^E:2.4e-06^RecName: Full=Protein STABIL…	0.47979	1.9786	0.541191	0.763583	0.278157	1.12615	2.36562	1.68415	0.814209	-0.136881	0.600085	0.126153	0.910425	0.600085	-4.04377	-4.04377	-4.04377
1	Nsylvestris_NODE_1080_length_4839_cov_38	TRN1_ARATH^TRN1_ARATH^Q:4544-420,H:4-1380^65.609%ID^E:0^RecName: Full=Protein TORNADO 1;^Eukaryota; Viridiplantae; Streptophyta; Embryophyta; Tracheophyta; Spermatophyta; Magnoliopsida; eudicotyledons; Gunneridae; Pentapetalae; rosids; malvids; Brassicales; Brassicaceae; Camelineae; Arabidopsis	0.562337	1.56114	0.0429328	-0.139897	-0.305575	1.54611	1.29061	0.510633	0.953388	-0.701833	0.252236	-0.484113	-0.145985	-0.266046	-0.915284	-2.07062	-1.69004
1	Nsylvestris_NODE_10802_length_2013_cov_184	NOA1_ARATH^NOA1_ARATH^Q:1913-270,H:12-559^65.162%ID^E:0^RecName: Full=NO-associated protein 1, chloroplastic/mitochondrial;^Eukaryota; Viridiplantae; Streptophyta; Embryophyta; Tracheophyta; Spermatophyta; Magnoliopsida; eudicotyledons; Gunneridae; Pentapetalae; rosids; malvids; Brassicales; Brassicaceae; Camelineae; Arabidopsis	0.891814	1.92489	0.933965	1.21702	1.00886	1.59453	2.47781	2.6736	0.843957	0.190382	1.07142	0.555817	0.0986104	0.803628	-6.14018	-4.00596	-6.14018
1	Nsylvestris_NODE_10807_length_2013_cov_104	LAC4_ARATH^LAC4_ARATH^Q:1909-284,H:7-547^76.937%ID^E:0^RecName: Full=Laccase-4;^Eukaryota; Viridiplantae; Streptophyta; Embryophyta; Tracheophyta; Spermatophyta; Magnoliopsida; eudicotyledons; Gunneridae; Pentapetalae; rosids; malvids; Brassicales; Brassicaceae; Camelineae; Arabidopsis	1.59528	1.58277	0.721367	1.75735	1.72794	1.14254	0.268069	0.565749	0.490461	-1.31689	-0.316894	0.143849	1.45182	0.137282	-3.31689	-3.31689	-3.31689
1	Nsylvestris_NODE_10811_length_2012_cov_184	AMI4G_ARATH^AMI4G_ARATH^Q:1733-288,H:38-508^64.182%ID^E:0^RecName: Full=Probable amidase At4g34880 {ECO:0000305};^Eukaryota; Viridiplantae; Streptophyta; Embryophyta; Tracheophyta; Spermatophyta; Magnoliopsida; eudicotyledons; Gunneridae; Pentapetalae; rosids; malvids; Brassicales; Brassicaceae; Camelineae; Arabidopsis	0.249988	1.25622	0.80763	1.27782	0.112484	1.29002	1.84118	1.50937	0.381232	-0.0319057	0.179598	-0.353834	-0.279833	-0.635977	-2.0782	-2.31636	-3.20944
1	Nsylvestris_NODE_10814_length_2012_cov_127	.	0.395884	0.932954	0.238952	0.879153	-1.06368	0.814688	1.11915	1.04073	0.918218	0.00224946	0.169288	0.390664	0.272088	-0.0373581	-2.37017	-1.72685	-1.97596
1	Nsylvestris_NODE_1082_length_4837_cov_42	.	0.729126	1.47626	0.109195	0.559079	-0.487257	1.0731	1.75117	0.866651	0.516143	0.205701	0.516709	0.500208	0.352395	-0.400829	-3.08877	-1.53396	-3.14494
1	Nsylvestris_NODE_10821_length_2011_cov_205	Y1680_ARATH^Y1680_ARATH^Q:1906-122,H:35-637^43.8%ID^E:5.02e-130^RecName: Full=Probable leucine-rich repeat receptor-like protein kinase At1g68400;^Eukaryota; Viridiplantae; Streptophyta; Embryophyta; Tracheophyta; Spermatophyta; Magnoliopsida; eudicotyledons; Gunneridae; Pentapetalae; rosids; malvids; Brassicales; Brassicaceae; Camelineae; Arabidopsis	-0.429098	-1.65487	0.920023	1.4897	-1.5477	1.08937	0.570902	0.21943	1.00704	-2.64216	-0.730699	1.00876	2.29903	-0.348717	0.496491	-1.35611	-0.391383
1	Nsylvestris_NODE_10823_length_2011_cov_153	.	0.598394	1.64616	0.391943	0.598394	0.150935	2.41942	2.88133	2.71387	0.598394	-1.72353	-0.138572	0.498858	0.276465	-0.986569	-3.3085	-3.3085	-3.3085
1	Nsylvestris_NODE_10824_length_2011_cov_25	.	0.539026	1.01296	-0.171468	-0.308971	-1.04594	1.22708	1.86095	0.828532	1.76142	-0.0459368	2.15046	-0.630899	0.176456	0.539026	-3.6309	-2.6309	-1.6309
1	Nsylvestris_NODE_10826_length_2010_cov_221	PR19A_ARATH^PR19A_ARATH^Q:1874-297,H:1-521^74.573%ID^E:0^RecName: Full=Pre-mRNA-processing factor 19 homolog 1 {ECO:0000305};^Eukaryota; Viridiplantae; Streptophyta; Embryophyta; Tracheophyta; Spermatophyta; Magnoliopsida; eudicotyledons; Gunneridae; Pentapetalae; rosids; malvids; Brassicales; Brassicaceae; Camelineae; Arabidopsis	0.838608	1.98366	0.213961	1.00096	0.368662	1.91556	2.03069	1.8796	1.10778	0.391056	0.701882	0.697861	1.06967	0.758315	-6.42874	-4.00382	-4.5257
1	Nsylvestris_NODE_10827_length_2010_cov_219	PTC52_ARATH^PTC52_ARATH^Q:1564-182,H:78-557^61.491%ID^E:0^RecName: Full=Protochlorophyllide-dependent translocon component 52, chloroplastic;^Eukaryota; Viridiplantae; Streptophyta; Embryophyta; Tracheophyta; Spermatophyta; Magnoliopsida; eudicotyledons; Gunneridae; Pentapetalae; rosids; malvids; Brassicales; Brassicaceae; Camelineae; Arabidopsis	0.19786	1.14475	0.289938	-0.0635178	-0.941635	1.18085	2.56676	2.12745	0.908187	-0.361795	0.85072	0.542487	1.0435	0.918888	-3.85447	-3.24002	-3.30996
1	Nsylvestris_NODE_10829_length_2010_cov_111	TRPE_ARATH^TRPE_ARATH^Q:96-1841,H:7-594^68.537%ID^E:0^RecName: Full=Anthranilate synthase alpha subunit 1, chloroplastic;^Eukaryota; Viridiplantae; Streptophyta; Embryophyta; Tracheophyta; Spermatophyta; Magnoliopsida; eudicotyledons; Gunneridae; Pentapetalae; rosids; malvids; Brassicales; Brassicaceae; Camelineae; Arabidopsis	0.272201	0.918763	0.718322	0.186336	-0.230852	1.03372	1.11897	0.733505	0.929304	0.0342676	0.601324	-0.220975	-0.461395	-1.08465	-1.59633	-1.63791	-1.3146
1	Nsylvestris_NODE_1083_length_4834_cov_24	POLX_TOBAC^POLX_TOBAC^Q:2632-1682,H:522-855^33.628%ID^E:3.32e-78^RecName: Full=Retrovirus-related Pol polyprotein from transposon TNT 1-94;^Eukaryota; Viridiplantae; Streptophyta; Embryophyta; Tracheophyta; Spermatophyta; Magnoliopsida; eudicotyledons; Gunneridae; Pentapetalae; asterids; lamiids; Solanales; Solanaceae; Nicotianoideae; Nicotianeae; Nicotiana`POLX_TOBAC^POLX_TOBAC^Q:1700-1191,H:850…	-0.807151	0.232522	-0.0354773	0.0871711	-0.649795	1.66418	-0.103826	1.59813	2.3911	2.01753	1.88439	1.53237	1.76366	1.12947	-4.23476	-4.23476	-4.23476
1	Nsylvestris_NODE_10830_length_2010_cov_107	.	0.0269661	0.856741	0.316473	0.73151	-0.920566	1.85704	1.3806	1.88679	1.27163	0.629631	0.664396	0.557481	0.795013	0.13006	-3.72792	-2.72792	-3.72792
1	Nsylvestris_NODE_10831_length_2010_cov_89	.	0.930884	1.68602	-0.580896	-0.784809	0.397883	1.56311	1.86428	1.56311	0.279948	-0.659278	0.797528	0.66265	0.0021672	-0.303135	-2.24424	-0.930995	-4.24424
1	Nsylvestris_NODE_10834_length_2009_cov_202	YQJG_ECOLI^YQJG_ECOLI^Q:1739-795,H:15-324^49.533%ID^E:8.61e-100^RecName: Full=Glutathionyl-hydroquinone reductase YqjG;^Bacteria; Proteobacteria; Gammaproteobacteria; Enterobacterales; Enterobacteriaceae; Escherichia	0.462263	0.856527	0.327743	0.696207	0.417854	1.33729	1.0345	1.05852	0.596973	-0.3641	-0.242642	0.333185	0.645713	-0.147257	-2.25563	-2.34744	-2.4097
1	Nsylvestris_NODE_10835_length_2009_cov_189	C77A1_SOLME^C77A1_SOLME^Q:1699-320,H:39-499^82.863%ID^E:0^RecName: Full=Cytochrome P450 77A1;^Eukaryota; Viridiplantae; Streptophyta; Embryophyta; Tracheophyta; Spermatophyta; Magnoliopsida; eudicotyledons; Gunneridae; Pentapetalae; asterids; lamiids; Solanales; Solanaceae; Solanoideae; Solaneae; Solanum	-0.225262	0.347974	-0.16652	0.334282	-1.17397	1.46888	1.97373	1.77964	1.19891	0.362593	0.646149	0.64135	0.84797	0.0567642	-2.64547	-2.87158	-2.57544
1	Nsylvestris_NODE_10847_length_2008_cov_78	ANTR5_ARATH^ANTR5_ARATH^Q:219-1544,H:1-432^75.566%ID^E:0^RecName: Full=Probable anion transporter 5;^Eukaryota; Viridiplantae; Streptophyta; Embryophyta; Tracheophyta; Spermatophyta; Magnoliopsida; eudicotyledons; Gunneridae; Pentapetalae; rosids; malvids; Brassicales; Brassicaceae; Camelineae; Arabidopsis	0.567547	1.46597	0.0911658	1.00987	0.700763	0.962681	1.33681	1.53455	1.25574	-0.876733	0.789755	-0.51835	-0.0363337	-1.16611	-2.14047	-2.84763	-2.12922
1	Nsylvestris_NODE_10850_length_2007_cov_200	TRPB2_AQUAE^TRPB2_AQUAE^Q:1665-400,H:10-434^61.647%ID^E:0^RecName: Full=Tryptophan synthase beta chain 2;^Bacteria; Aquificae; Aquificales; Aquificaceae; Aquifex	1.12625	1.67078	0.812915	1.38334	0.48054	2.18521	2.25769	2.40422	0.786878	-0.306095	0.615739	0.928594	0.775254	0.367411	-6.55288	-3.96792	-4.96792
1	Nsylvestris_NODE_10852_length_2010_cov_122	.	0.637749	1.75974	0.00971778	-1.44971	0.457177	2.79821	1.75974	1.13525	1.55029	-0.642359	0.637749	0.250726	1.19414	0.250726	-3.44971	-3.44971	-3.44971
1	Nsylvestris_NODE_10855_length_2006_cov_195	AHL8_ARATH^AHL8_ARATH^Q:1388-735,H:101-329^58.515%ID^E:8.75e-57^RecName: Full=AT-hook motif nuclear-localized protein 8 {ECO:0000312|EMBL:FAA00279.1};^Eukaryota; Viridiplantae; Streptophyta; Embryophyta; Tracheophyta; Spermatophyta; Magnoliopsida; eudicotyledons; Gunneridae; Pentapetalae; rosids; malvids; Brassicales; Brassicaceae; Camelineae; Arabidopsis	0.789485	1.91325	0.88492	0.742235	-0.364131	0.523403	1.03323	1.34769	0.63583	0.248868	0.363194	0.121968	-0.255214	-0.290891	-2.12585	-2.9268	-2.64119
1	Nsylvestris_NODE_10856_length_2006_cov_187	AMSH3_ARATH^AMSH3_ARATH^Q:146-1675,H:3-507^60.861%ID^E:0^RecName: Full=AMSH-like ubiquitin thioesterase 3;^Eukaryota; Viridiplantae; Streptophyta; Embryophyta; Tracheophyta; Spermatophyta; Magnoliopsida; eudicotyledons; Gunneridae; Pentapetalae; rosids; malvids; Brassicales; Brassicaceae; Camelineae; Arabidopsis	-0.169514	0.366611	-0.352413	-0.221686	-0.158011	1.42487	1.04837	0.973705	1.22961	-0.113698	0.532378	0.0790981	0.38059	0.259941	-2.18769	-1.85559	-1.23657
1	Nsylvestris_NODE_10857_length_2006_cov_140	BPM3_ARATH^BPM3_ARATH^Q:1817-843,H:13-339^73.7%ID^E:1.95e-159^RecName: Full=BTB/POZ and MATH domain-containing protein 3;^Eukaryota; Viridiplantae; Streptophyta; Embryophyta; Tracheophyta; Spermatophyta; Magnoliopsida; eudicotyledons; Gunneridae; Pentapetalae; rosids; malvids; Brassicales; Brassicaceae; Camelineae; Arabidopsis	0.286375	1.25401	-0.349192	0.18681	-0.135263	1.2563	1.4188	1.25616	0.760566	-0.565117	0.959092	0.462331	0.40204	0.0372378	-1.6823	-3.24519	-2.30265
1	Nsylvestris_NODE_10862_length_2006_cov_47	DTX42_ARATH^DTX42_ARATH^Q:311-1879,H:1-515^67.176%ID^E:0^RecName: Full=Protein DETOXIFICATION 42 {ECO:0000303|PubMed:11739388};^Eukaryota; Viridiplantae; Streptophyta; Embryophyta; Tracheophyta; Spermatophyta; Magnoliopsida; eudicotyledons; Gunneridae; Pentapetalae; rosids; malvids; Brassicales; Brassicaceae; Camelineae; Arabidopsis	-3.67644	-2.09147	0.591849	1.14119	0.692333	0.130919	1.41103	1.41103	0.226602	-0.676436	-0.354508	0.0206708	0.96742	0.323564	-0.498518	0.847753	-0.466982
1	Nsylvestris_NODE_10863_length_2006_cov_45	.	0.821194	1.99539	-0.147522	0.619733	-0.209608	1.65822	1.42008	1.64594	0.698848	0.664007	0.418562	0.94931	0.556894	0.392483	-3.82785	-3.82785	-3.82785
1	Nsylvestris_NODE_10864_length_2005_cov_219	DML_EUBBA^DML_EUBBA^Q:335-1198,H:2-287^43.793%ID^E:5.77e-70^RecName: Full=2,3-dimethylmalate lyase {ECO:0000312|EMBL:ABC88406.1};^Bacteria; Firmicutes; Clostridia; Clostridiales; Eubacteriaceae; Eubacterium	0.123057	1.11856	-0.178164	0.0986068	0.148968	1.75921	2.00583	1.68413	1.49886	0.42045	1.38796	0.677493	0.966319	0.474126	-3.38232	-4.42616	-4.37693
1	Nsylvestris_NODE_10869_length_2005_cov_75	.	0.0614991	0.864881	1.13661	1.48664	0.80328	1.68919	1.49938	1.66197	0.35598	0.43144	0.450541	-0.435227	0.178662	-0.782119	-4.24155	-1.91962	-3.24155
1	Nsylvestris_NODE_10871_length_2004_cov_202	SVR1_ARATH^SVR1_ARATH^Q:350-1330,H:70-410^69.208%ID^E:8.98e-165^RecName: Full=Putative ribosomal large subunit pseudouridine synthase SVR1, chloroplastic {ECO:0000305};^Eukaryota; Viridiplantae; Streptophyta; Embryophyta; Tracheophyta; Spermatophyta; Magnoliopsida; eudicotyledons; Gunneridae; Pentapetalae; rosids; malvids; Brassicales; Brassicaceae; Camelineae; Arabidopsis	0.185986	1.46492	0.440886	0.384437	-1.55285	0.530601	0.801905	0.321312	0.905869	0.317533	0.46285	0.378188	-0.0160687	0.278185	-1.6165	-1.60026	-1.68699
1	Nsylvestris_NODE_10873_length_1994_cov_12	PERX_NICSY^PERX_NICSY^Q:1562-1416,H:228-276^77.551%ID^E:2.36e-18^RecName: Full=Lignin-forming anionic peroxidase;^Eukaryota; Viridiplantae; Streptophyta; Embryophyta; Tracheophyta; Spermatophyta; Magnoliopsida; eudicotyledons; Gunneridae; Pentapetalae; asterids; lamiids; Solanales; Solanaceae; Nicotianoideae; Nicotianeae; Nicotiana`PERX_NICSY^PERX_NICSY^Q:1648-1571,H:192-218^59.259%ID^E:2.36e-18^…	-0.964362	0.0356383	0.0356383	0.620601	-0.856674	1.98983	1.94253	1.1231	1.03564	-0.642434	1.79053	0.205563	-0.642434	-0.964362	-0.365044	-2.96436	-1.3794
1	Nsylvestris_NODE_10874_length_2003_cov_221	PS12A_ARATH^PS12A_ARATH^Q:1829-507,H:1-441^82.313%ID^E:0^RecName: Full=26S proteasome non-ATPase regulatory subunit 12 homolog A;^Eukaryota; Viridiplantae; Streptophyta; Embryophyta; Tracheophyta; Spermatophyta; Magnoliopsida; eudicotyledons; Gunneridae; Pentapetalae; rosids; malvids; Brassicales; Brassicaceae; Camelineae; Arabidopsis	-0.379857	0.604635	-0.391672	-0.0503779	-0.216494	0.993285	0.725226	0.776722	0.881086	-0.0392681	0.179989	0.123345	0.41178	-0.0571273	-1.23216	-1.023	-1.30611
1	Nsylvestris_NODE_10876_length_2003_cov_210	TRXB3_ARATH^TRXB3_ARATH^Q:1558-218,H:83-529^85.459%ID^E:0^RecName: Full=NADPH-dependent thioredoxin reductase 3;^Eukaryota; Viridiplantae; Streptophyta; Embryophyta; Tracheophyta; Spermatophyta; Magnoliopsida; eudicotyledons; Gunneridae; Pentapetalae; rosids; malvids; Brassicales; Brassicaceae; Camelineae; Arabidopsis	-0.0571117	0.533237	-0.0479094	-0.412266	-0.0853491	1.90524	2.48416	2.50556	0.949496	0.466119	1.10286	-0.272741	0.530391	0.155134	-3.61753	-3.09933	-3.03995
1	Nsylvestris_NODE_10878_length_2003_cov_204	EGY1_ARATH^EGY1_ARATH^Q:484-1788,H:114-548^84.598%ID^E:0^RecName: Full=Probable zinc metalloprotease EGY1, chloroplastic;^Eukaryota; Viridiplantae; Streptophyta; Embryophyta; Tracheophyta; Spermatophyta; Magnoliopsida; eudicotyledons; Gunneridae; Pentapetalae; rosids; malvids; Brassicales; Brassicaceae; Camelineae; Arabidopsis	0.362307	0.949765	0.172524	0.128783	-0.581289	1.46056	1.48866	1.64419	0.699907	0.247361	0.757563	0.510304	0.390388	0.246264	-3.52607	-2.37324	-2.57798
1	Nsylvestris_NODE_10884_length_2003_cov_135	DOF24_ARATH^DOF24_ARATH^Q:227-619,H:1-138^61.429%ID^E:1.02e-40^RecName: Full=Dof zinc finger protein DOF2.4 {ECO:0000303|PubMed:12475498};^Eukaryota; Viridiplantae; Streptophyta; Embryophyta; Tracheophyta; Spermatophyta; Magnoliopsida; eudicotyledons; Gunneridae; Pentapetalae; rosids; malvids; Brassicales; Brassicaceae; Camelineae; Arabidopsis	0.277347	1.1544	0.654489	-0.0161194	-0.759236	0.630831	0.788827	0.304894	0.924358	0.235837	0.674533	0.99163	0.635993	-0.0919977	-1.43172	-1.98498	-2.98908
1	Nsylvestris_NODE_10888_length_2002_cov_91	EDR2_ARATH^EDR2_ARATH^Q:1122-382,H:500-709^24.8%ID^E:2.06e-07^RecName: Full=Protein ENHANCED DISEASE RESISTANCE 2;^Eukaryota; Viridiplantae; Streptophyta; Embryophyta; Tracheophyta; Spermatophyta; Magnoliopsida; eudicotyledons; Gunneridae; Pentapetalae; rosids; malvids; Brassicales; Brassicaceae; Camelineae; Arabidopsis	-1.39652	-1.2748	-0.951317	0.519377	-0.399058	0.512631	1.03619	0.938895	0.921682	0.0204252	0.535886	0.618644	0.709946	-0.231114	-0.978941	-0.457033	-0.1249
1	Nsylvestris_NODE_1089_length_4831_cov_168	PP304_ARATH^PP304_ARATH^Q:4132-2072,H:119-805^46.143%ID^E:0^RecName: Full=Pentatricopeptide repeat-containing protein At4g04790, mitochondrial;^Eukaryota; Viridiplantae; Streptophyta; Embryophyta; Tracheophyta; Spermatophyta; Magnoliopsida; eudicotyledons; Gunneridae; Pentapetalae; rosids; malvids; Brassicales; Brassicaceae; Camelineae; Arabidopsis	0.269175	1.53214	0.379703	0.51252	-0.424467	1.26545	0.732154	1.16464	-0.365627	-0.231911	-0.0459277	0.569186	0.0263423	-0.382047	-0.879156	-2.32196	-1.80022
1	Nsylvestris_NODE_10893_length_2001_cov_205	GRP1_DAUCA^GRP1_DAUCA^Q:1495-1620,H:1-42^71.429%ID^E:5.78e-12^RecName: Full=Glycine-rich RNA-binding protein;^Eukaryota; Viridiplantae; Streptophyta; Embryophyta; Tracheophyta; Spermatophyta; Magnoliopsida; eudicotyledons; Gunneridae; Pentapetalae; asterids; campanulids; Apiales; Apiaceae; Apioideae; Scandiceae; Daucinae; Daucus; Daucus sect. Daucus	0.401182	1.4516	0.54626	0.468149	0.174378	1.40684	1.1688	0.358239	1.21338	-0.29156	1.07046	-0.0729077	0.460502	-0.118486	-2.22307	-3.14122	-2.87254
1	Nsylvestris_NODE_10896_length_2001_cov_82	RBL_TOBAC^RBL_TOBAC^Q:1375-8,H:1-449^97.807%ID^E:0^RecName: Full=Ribulose bisphosphate carboxylase large chain;^Eukaryota; Viridiplantae; Streptophyta; Embryophyta; Tracheophyta; Spermatophyta; Magnoliopsida; eudicotyledons; Gunneridae; Pentapetalae; asterids; lamiids; Solanales; Solanaceae; Nicotianoideae; Nicotianeae; Nicotiana	0.712555	1.30692	0.59575	-0.171485	1.20162	0.163812	0.311414	0.479419	0.461269	0.306189	0.983038	0.533855	1.29827	1.27658	-2.82797	-2.87312	-3.75812
1	Nsylvestris_NODE_10897_length_2001_cov_65	C734A_ARATH^C734A_ARATH^Q:1761-181,H:12-517^69.737%ID^E:0^RecName: Full=Cytochrome P450 734A1;^Eukaryota; Viridiplantae; Streptophyta; Embryophyta; Tracheophyta; Spermatophyta; Magnoliopsida; eudicotyledons; Gunneridae; Pentapetalae; rosids; malvids; Brassicales; Brassicaceae; Camelineae; Arabidopsis	0.0329749	1.17201	-0.962208	-1.54717	-2.54717	2.13428	0.912261	1.03779	2.15881	0.869669	1.67084	1.45012	0.871019	0.388289	-2.54717	-2.54717	-2.54717
1	Nsylvestris_NODE_10898_length_2001_cov_59	.	0.501767	1.7781	0.0973765	1.09738	-0.182731	1.81353	2.29532	2.46935	1.15966	0.570629	1.03848	0.624624	1.14228	0.564503	-4.99009	-4.99009	-4.99009
1	Nsylvestris_NODE_10901_length_2000_cov_223	SGS3_ORYSJ^SGS3_ORYSJ^Q:1105-1494,H:277-392^26.866%ID^E:7.5e-08^RecName: Full=Protein SUPPRESSOR OF GENE SILENCING 3 homolog;^Eukaryota; Viridiplantae; Streptophyta; Embryophyta; Tracheophyta; Spermatophyta; Magnoliopsida; Liliopsida; Poales; Poaceae; BOP clade; Oryzoideae; Oryzeae; Oryzinae; Oryza; Oryza sativa	0.25687	0.902696	-0.109947	0.366764	-0.753083	0.599295	1.08118	0.608281	0.96935	0.251927	0.849193	0.30783	0.316408	-0.0712041	-1.62108	-1.73491	-2.21958
1	Nsylvestris_NODE_10902_length_2000_cov_95	DNJ10_ARATH^DNJ10_ARATH^Q:748-326,H:172-315^54.861%ID^E:5.93e-39^RecName: Full=Chaperone protein dnaJ 10;^Eukaryota; Viridiplantae; Streptophyta; Embryophyta; Tracheophyta; Spermatophyta; Magnoliopsida; eudicotyledons; Gunneridae; Pentapetalae; rosids; malvids; Brassicales; Brassicaceae; Camelineae; Arabidopsis	0.23543	1.22708	0.297675	0.874529	0.737776	1.76131	2.22793	1.26302	0.332789	-0.480679	0.028732	-0.155938	0.0477166	-0.231742	-2.83023	-2.14271	-3.19269
1	Nsylvestris_NODE_10904_length_2000_cov_10	POLR1_ARATH^POLR1_ARATH^Q:143-1579,H:955-1434^40.625%ID^E:6.37e-118^RecName: Full=Retrovirus-related Pol polyprotein from transposon RE1;^Eukaryota; Viridiplantae; Streptophyta; Embryophyta; Tracheophyta; Spermatophyta; Magnoliopsida; eudicotyledons; Gunneridae; Pentapetalae; rosids; malvids; Brassicales; Brassicaceae; Camelineae; Arabidopsis	-0.928254	0.0717463	0.393674	-0.343291	-1.92825	3.53118	3.11614	2.46406	-0.343291	-1.92825	1.07175	-1.92825	-0.343291	0.879101	-1.92825	0.0717463	-1.92825
1	Nsylvestris_NODE_10906_length_1999_cov_180	ACOC_CUCMA^ACOC_CUCMA^Q:598-338,H:666-753^48.387%ID^E:1.03e-08^RecName: Full=Aconitate hydratase, cytoplasmic;^Eukaryota; Viridiplantae; Streptophyta; Embryophyta; Tracheophyta; Spermatophyta; Magnoliopsida; eudicotyledons; Gunneridae; Pentapetalae; rosids; fabids; Cucurbitales; Cucurbitaceae; Cucurbiteae; Cucurbita	0.372979	1.30083	0.224881	0.570016	0.407745	1.84832	1.79679	1.37298	1.83561	1.01543	1.64478	0.474859	1.45837	0.630137	-4.98457	-4.98457	-4.98457
1	Nsylvestris_NODE_10907_length_1999_cov_160	FPS_PANGI^FPS_PANGI^Q:199-1116,H:1-306^85.294%ID^E:0^RecName: Full=Farnesyl pyrophosphate synthase {ECO:0000303|PubMed:29509695, ECO:0000303|Ref.1};^Eukaryota; Viridiplantae; Streptophyta; Embryophyta; Tracheophyta; Spermatophyta; Magnoliopsida; eudicotyledons; Gunneridae; Pentapetalae; asterids; campanulids; Apiales; Araliaceae; Panax`FPS_PANGI^FPS_PANGI^Q:1638-1763,H:301-342^73.81%ID^E:1.05e-09…	0.873631	1.65305	0.713219	1.21159	0.592238	1.99649	1.7258	1.79031	1.15099	0.481003	0.661424	0.532996	0.854117	0.315946	-5.93758	-4.05856	-4.55666
1	Nsylvestris_NODE_10909_length_1999_cov_74	.	0.0854406	1.54589	0.488796	0.0173066	0.175638	0.859709	-0.168316	-0.788951	2.54614	1.67629	1.93473	1.41757	1.76235	2.05368	-4.86876	-3.86876	-4.86876
1	Nsylvestris_NODE_1091_length_4831_cov_112	MMSA_ARATH^MMSA_ARATH^Q:819-1574,H:100-341^68.254%ID^E:7.26e-111^RecName: Full=Methylmalonate-semialdehyde dehydrogenase [acylating], mitochondrial;^Eukaryota; Viridiplantae; Streptophyta; Embryophyta; Tracheophyta; Spermatophyta; Magnoliopsida; eudicotyledons; Gunneridae; Pentapetalae; rosids; malvids; Brassicales; Brassicaceae; Camelineae; Arabidopsis`MMSA_ARATH^MMSA_ARATH^Q:3713-4012,H:464-562…	0.483621	1.62112	0.486942	-0.0213434	0.285796	2.05403	1.9414	1.61515	1.9733	0.143236	1.35233	0.937261	1.36003	0.894201	-5.72095	-4.71376	-4.69238
1	Nsylvestris_NODE_10911_length_1998_cov_216	NDUV1_ARATH^NDUV1_ARATH^Q:1835-444,H:1-465^91.183%ID^E:0^RecName: Full=NADH dehydrogenase [ubiquinone] flavoprotein 1, mitochondrial;^Eukaryota; Viridiplantae; Streptophyta; Embryophyta; Tracheophyta; Spermatophyta; Magnoliopsida; eudicotyledons; Gunneridae; Pentapetalae; rosids; malvids; Brassicales; Brassicaceae; Camelineae; Arabidopsis	0.214351	1.40155	0.301103	0.756855	-0.635662	0.363282	0.572858	0.707926	0.849362	-0.346493	0.649978	-0.129031	-0.293675	-0.450674	-0.877408	-1.51935	-1.56498
1	Nsylvestris_NODE_10916_length_1998_cov_109	PPH_ARATH^PPH_ARATH^Q:1097-348,H:129-411^25.517%ID^E:1.08e-17^RecName: Full=Pheophytinase, chloroplastic;^Eukaryota; Viridiplantae; Streptophyta; Embryophyta; Tracheophyta; Spermatophyta; Magnoliopsida; eudicotyledons; Gunneridae; Pentapetalae; rosids; malvids; Brassicales; Brassicaceae; Camelineae; Arabidopsis	0.932396	1.84117	0.956895	0.447401	-0.171533	1.39718	2.72168	2.70155	1.28855	0.572428	1.40688	-0.50667	0.790857	0.554772	-4.97786	-4.97786	-4.97786
1	Nsylvestris_NODE_1092_length_4831_cov_81	YRDC_HUMAN^YRDC_HUMAN^Q:890-408,H:106-268^46.988%ID^E:3.63e-39^RecName: Full=YrdC domain-containing protein, mitochondrial;^Eukaryota; Metazoa; Chordata; Craniata; Vertebrata; Euteleostomi; Mammalia; Eutheria; Euarchontoglires; Primates; Haplorrhini; Catarrhini; Hominidae; Homo	0.662106	1.4627	0.127524	0.378818	-0.377045	1.53818	1.84362	1.64949	1.00041	0.146587	0.815158	0.780868	0.372313	0.584529	-3.91419	-3.53868	-3.53237
1	Nsylvestris_NODE_10920_length_1998_cov_16	.	0.351356	1.67328	1.22582	0.351356	0.573748	1.85386	3.01432	3.01432	1.22582	0.351356	-0.233607	-2.23361	-2.23361	-2.23361	-2.23361	-2.23361	-2.23361
1	Nsylvestris_NODE_10923_length_1997_cov_218	NDUV1_ARATH^NDUV1_ARATH^Q:154-1548,H:1-465^92.043%ID^E:0^RecName: Full=NADH dehydrogenase [ubiquinone] flavoprotein 1, mitochondrial;^Eukaryota; Viridiplantae; Streptophyta; Embryophyta; Tracheophyta; Spermatophyta; Magnoliopsida; eudicotyledons; Gunneridae; Pentapetalae; rosids; malvids; Brassicales; Brassicaceae; Camelineae; Arabidopsis	0.124373	1.12116	0.244549	0.601738	-0.611513	0.656918	0.783298	0.935327	0.66435	-0.45375	0.5176	-0.226413	-0.267511	-0.163638	-1.21762	-1.57688	-1.13199
1	Nsylvestris_NODE_10924_length_1997_cov_209	C89A9_ARATH^C89A9_ARATH^Q:127-1653,H:8-509^50.674%ID^E:8.44e-171^RecName: Full=Cytochrome P450 89A9;^Eukaryota; Viridiplantae; Streptophyta; Embryophyta; Tracheophyta; Spermatophyta; Magnoliopsida; eudicotyledons; Gunneridae; Pentapetalae; rosids; malvids; Brassicales; Brassicaceae; Camelineae; Arabidopsis	0.0473444	1.17427	0.0344106	-0.289465	-0.524598	1.34378	1.37855	0.527517	1.06633	0.249982	1.2404	0.29479	-0.0685485	0.117198	-1.91454	-2.12874	-2.54868
1	Nsylvestris_NODE_10930_length_1996_cov_192	PP1_ORYSJ^PP1_ORYSJ^Q:838-2,H:15-294^85.714%ID^E:3.22e-176^RecName: Full=Serine/threonine-protein phosphatase PP1;^Eukaryota; Viridiplantae; Streptophyta; Embryophyta; Tracheophyta; Spermatophyta; Magnoliopsida; Liliopsida; Poales; Poaceae; BOP clade; Oryzoideae; Oryzeae; Oryzinae; Oryza; Oryza sativa	0.149587	0.900979	0.107532	0.640193	-0.0534882	1.1775	1.39775	1.17716	0.34553	-0.286242	0.211432	0.0972974	0.385807	-0.0969564	-2.20657	-1.71919	-2.22831
1	Nsylvestris_NODE_10932_length_1996_cov_152	TMVRN_NICGU^TMVRN_NICGU^Q:1-810,H:264-533^75.646%ID^E:3.88e-130^RecName: Full=TMV resistance protein N;^Eukaryota; Viridiplantae; Streptophyta; Embryophyta; Tracheophyta; Spermatophyta; Magnoliopsida; eudicotyledons; Gunneridae; Pentapetalae; asterids; lamiids; Solanales; Solanaceae; Nicotianoideae; Nicotianeae; Nicotiana`TMVRN_NICGU^TMVRN_NICGU^Q:1462-1995,H:522-693^65.363%ID^E:2.69e-64^RecName:…	0.826126	2.41958	0.225658	-0.782916	-0.643207	0.83966	-0.0157157	-0.257859	0.526412	-0.70321	-0.0169051	-0.923052	-0.396488	-0.74991	-0.223814	0.0735992	-0.197953
1	Nsylvestris_NODE_10935_length_1996_cov_50	NDC80_ARATH^NDC80_ARATH^Q:1431-1967,H:369-543^46.927%ID^E:2.11e-29^RecName: Full=Kinetochore protein NDC80 homolog {ECO:0000303|PubMed:29356153};^Eukaryota; Viridiplantae; Streptophyta; Embryophyta; Tracheophyta; Spermatophyta; Magnoliopsida; eudicotyledons; Gunneridae; Pentapetalae; rosids; malvids; Brassicales; Brassicaceae; Camelineae; Arabidopsis	0.490281	0.395892	0.213107	-0.488856	-0.175962	2.07402	1.17382	1.28965	-0.164408	0.968774	-0.487056	1.12641	0.947635	1.10866	-3.49066	-2.49066	-2.49066
1	Nsylvestris_NODE_10936_length_1995_cov_29	.	-0.593272	0.880659	-0.655394	-0.276882	-0.0800817	1.80404	1.87218	1.8043	0.60764	0.585226	0.323534	-0.169967	0.830033	-1.16997	-0.807397	-1.97732	-2.97732
1	Nsylvestris_NODE_10937_length_1996_cov_21	FRIGI_ARATH^FRIGI_ARATH^Q:216-1442,H:59-453^34.554%ID^E:3.02e-63^RecName: Full=Protein FRIGIDA {ECO:0000303|PubMed:11030654};^Eukaryota; Viridiplantae; Streptophyta; Embryophyta; Tracheophyta; Spermatophyta; Magnoliopsida; eudicotyledons; Gunneridae; Pentapetalae; rosids; malvids; Brassicales; Brassicaceae; Camelineae; Arabidopsis	-0.178591	1.20843	0.120969	0.513287	0.290894	1.07517	-0.0716759	0.764825	-0.419599	-1.29407	0.0278598	-0.178591	1.16536	0.705932	-1.5571	-0.879031	-1.29407
1	Nsylvestris_NODE_10940_length_1995_cov_184	.	0.544903	1.59236	0.709609	0.969094	-0.205551	1.80847	1.82183	1.47813	2.13013	1.10708	1.50364	1.49408	1.76266	1.10271	-5.93972	-5.93972	-5.93972
1	Nsylvestris_NODE_10942_length_1995_cov_91	.	1.25582	2.20781	1.13277	1.06951	0.78027	-0.361995	1.57089	0.266037	1.42688	-0.259489	0.211556	-0.309199	1.19382	-1.8035	-2.83593	-1.72382	-3.82143
1	Nsylvestris_NODE_10944_length_1995_cov_55	C3H62_ORYSJ^C3H62_ORYSJ^Q:1665-961,H:109-345^53.556%ID^E:7.76e-65^RecName: Full=Zinc finger CCCH domain-containing protein 62;^Eukaryota; Viridiplantae; Streptophyta; Embryophyta; Tracheophyta; Spermatophyta; Magnoliopsida; Liliopsida; Poales; Poaceae; BOP clade; Oryzoideae; Oryzeae; Oryzinae; Oryza; Oryza sativa	-0.0189943	1.44044	0.888858	0.565968	1.30293	0.887896	0.788361	1.68145	0.150931	0.682555	0.444367	0.150931	0.302934	-0.211639	-3.01899	-3.01899	-3.01899
1	Nsylvestris_NODE_10947_length_1994_cov_196	ASIL2_ARATH^ASIL2_ARATH^Q:600-881,H:84-178^45.361%ID^E:1.2e-11^RecName: Full=Trihelix transcription factor ASIL2 {ECO:0000305};^Eukaryota; Viridiplantae; Streptophyta; Embryophyta; Tracheophyta; Spermatophyta; Magnoliopsida; eudicotyledons; Gunneridae; Pentapetalae; rosids; malvids; Brassicales; Brassicaceae; Camelineae; Arabidopsis	0.0715008	0.974565	-0.0817849	0.112386	-0.58853	0.840553	1.59375	0.839014	0.601513	-0.122862	0.14698	-0.216627	-0.0781694	-0.516707	-1.14474	-0.922425	-1.50842
1	Nsylvestris_NODE_10949_length_1994_cov_119	.	0.179572	0.582636	0.626625	0.698786	0.136516	1.11566	1.47941	0.582789	0.758025	-0.14907	0.285399	0.0728129	0.918039	-1.12681	-2.16444	-1.37606	-2.61989
1	Nsylvestris_NODE_10955_length_1993_cov_204	.	0.853922	1.5743	0.678835	0.514716	0.309601	1.60728	2.48397	1.25862	2.18952	0.599108	1.8676	0.985166	1.79073	0.867597	-5.86032	-5.86032	-5.86032
1	Nsylvestris_NODE_10957_length_1993_cov_190	Y3567_ARATH^Y3567_ARATH^Q:453-1763,H:1-439^58.05%ID^E:5.71e-177^RecName: Full=BTB/POZ domain-containing protein At3g05675;^Eukaryota; Viridiplantae; Streptophyta; Embryophyta; Tracheophyta; Spermatophyta; Magnoliopsida; eudicotyledons; Gunneridae; Pentapetalae; rosids; malvids; Brassicales; Brassicaceae; Camelineae; Arabidopsis	0.545406	1.7887	0.473759	0.898415	0.542115	1.62318	2.14558	2.10736	1.67139	1.04635	1.28446	0.135173	1.25932	0.0593218	-6.1118	-6.1118	-3.35692
1	Nsylvestris_NODE_10958_length_1993_cov_129	GDL88_ARATH^GDL88_ARATH^Q:1803-1423,H:1-127^76.378%ID^E:4.25e-66^RecName: Full=GDSL esterase/lipase At5g62930;^Eukaryota; Viridiplantae; Streptophyta; Embryophyta; Tracheophyta; Spermatophyta; Magnoliopsida; eudicotyledons; Gunneridae; Pentapetalae; rosids; malvids; Brassicales; Brassicaceae; Camelineae; Arabidopsis`GDL88_ARATH^GDL88_ARATH^Q:573-244,H:132-241^65.455%ID^E:2.35e-43^RecName: Full=GD…	0.270926	0.75081	-0.0898765	0.356281	0.395104	1.58065	1.56373	1.21102	0.601459	0.0969932	0.405338	0.156629	0.488334	-0.0639991	-2.3942	-2.11107	-3.21812
1	Nsylvestris_NODE_10959_length_1993_cov_86	PCH2_ARATH^PCH2_ARATH^Q:1719-457,H:45-467^76.832%ID^E:0^RecName: Full=Pachytene checkpoint protein 2 homolog {ECO:0000305};^Eukaryota; Viridiplantae; Streptophyta; Embryophyta; Tracheophyta; Spermatophyta; Magnoliopsida; eudicotyledons; Gunneridae; Pentapetalae; rosids; malvids; Brassicales; Brassicaceae; Camelineae; Arabidopsis	0.534996	1.17921	0.637553	0.183769	0.58343	2.22854	2.14608	1.34402	0.80062	0.750148	0.414053	-0.111536	-0.170557	-0.43169	-2.20586	-3.94139	-3.94139
1	Nsylvestris_NODE_10962_length_1993_cov_8	.	0.232561	0.884638	0.232561	0.425206	-0.574794	1.81752	0.884638	2.01017	1.94185	-1.57479	0.232561	0.747134	0.232561	0.232561	-2.57479	-2.57479	-2.57479
1	Nsylvestris_NODE_10963_length_1992_cov_191	OCT4_ARATH^OCT4_ARATH^Q:1794-220,H:3-516^65.275%ID^E:0^RecName: Full=Organic cation/carnitine transporter 4;^Eukaryota; Viridiplantae; Streptophyta; Embryophyta; Tracheophyta; Spermatophyta; Magnoliopsida; eudicotyledons; Gunneridae; Pentapetalae; rosids; malvids; Brassicales; Brassicaceae; Camelineae; Arabidopsis	0.460546	1.25072	0.201075	0.0854535	0.257947	0.824294	1.8149	2.0653	1.15742	1.51147	1.32437	1.33887	0.488245	1.47649	-4.44249	-4.3721	-5.44249
1	Nsylvestris_NODE_10966_length_1992_cov_32	LYK3_MEDTR^LYK3_MEDTR^Q:61-1827,H:6-601^50.082%ID^E:0^RecName: Full=LysM domain receptor-like kinase 3 {ECO:0000303|PubMed:12947035};^Eukaryota; Viridiplantae; Streptophyta; Embryophyta; Tracheophyta; Spermatophyta; Magnoliopsida; eudicotyledons; Gunneridae; Pentapetalae; rosids; fabids; Fabales; Fabaceae; Papilionoideae; 50 kb inversion clade; NPAAA clade; Hologalegina; IRL clade; Trifolieae; Me…	-0.0573877	0.473127	0.473127	-0.64235	1.29625	1.52757	1.77269	0.0946153	1.29625	0.772687	-1.22731	0.679578	1.165	0.473127	-3.22731	-1.64235	-3.22731
1	Nsylvestris_NODE_10969_length_1991_cov_218	PUX2_ARATH^PUX2_ARATH^Q:1682-330,H:1-457^61.388%ID^E:1.7e-160^RecName: Full=Plant UBX domain-containing protein 2 {ECO:0000303|Ref.8};^Eukaryota; Viridiplantae; Streptophyta; Embryophyta; Tracheophyta; Spermatophyta; Magnoliopsida; eudicotyledons; Gunneridae; Pentapetalae; rosids; malvids; Brassicales; Brassicaceae; Camelineae; Arabidopsis	-0.418241	0.250237	-0.382338	-0.0934127	-0.264492	1.54499	1.15412	0.709819	1.12076	0.337764	0.615844	0.646104	0.436924	-0.350981	-1.73757	-1.27422	-2.2953
1	Nsylvestris_NODE_10970_length_1991_cov_215	RS8_MAIZE^RS8_MAIZE^Q:1891-1262,H:1-213^85.047%ID^E:1.6e-94^RecName: Full=40S ribosomal protein S8;^Eukaryota; Viridiplantae; Streptophyta; Embryophyta; Tracheophyta; Spermatophyta; Magnoliopsida; Liliopsida; Poales; Poaceae; PACMAD clade; Panicoideae; Andropogonodae; Andropogoneae; Tripsacinae; Zea	0.49796	1.06329	0.0295194	0.618312	-0.515137	1.10123	1.45231	1.47471	0.594754	0.23249	0.734676	0.207961	-0.00420363	0.0423406	-2.40905	-2.4304	-2.69077
1	Nsylvestris_NODE_10972_length_1991_cov_195	CLT2_ARATH^CLT2_ARATH^Q:337-1350,H:91-429^67.847%ID^E:9.47e-121^RecName: Full=Protein CLT2, chloroplastic {ECO:0000303|PubMed:20080670};^Eukaryota; Viridiplantae; Streptophyta; Embryophyta; Tracheophyta; Spermatophyta; Magnoliopsida; eudicotyledons; Gunneridae; Pentapetalae; rosids; malvids; Brassicales; Brassicaceae; Camelineae; Arabidopsis	0.407597	0.995757	-0.355033	-0.0672118	-0.0277131	1.20819	1.84515	1.08205	0.984599	0.348374	1.04675	0.483083	1.08023	0.380101	-1.93955	-2.82567	-4.6467
1	Nsylvestris_NODE_10974_length_1991_cov_174	CDKC2_ARATH^CDKC2_ARATH^Q:1790-270,H:1-512^75.385%ID^E:0^RecName: Full=Cyclin-dependent kinase C-2;^Eukaryota; Viridiplantae; Streptophyta; Embryophyta; Tracheophyta; Spermatophyta; Magnoliopsida; eudicotyledons; Gunneridae; Pentapetalae; rosids; malvids; Brassicales; Brassicaceae; Camelineae; Arabidopsis	0.658477	1.78779	1.10938	1.09093	0.0791698	1.6738	1.7899	1.5004	1.19968	0.279279	1.3478	0.909409	0.850543	0.715748	-5.83945	-3.31339	-5.83945
1	Nsylvestris_NODE_10975_length_1991_cov_96	DCUP_TOBAC^DCUP_TOBAC^Q:880-368,H:221-391^94.737%ID^E:9.27e-99^RecName: Full=Uroporphyrinogen decarboxylase, chloroplastic;^Eukaryota; Viridiplantae; Streptophyta; Embryophyta; Tracheophyta; Spermatophyta; Magnoliopsida; eudicotyledons; Gunneridae; Pentapetalae; asterids; lamiids; Solanales; Solanaceae; Nicotianoideae; Nicotianeae; Nicotiana	-0.26112	0.877909	-0.219247	-0.234872	-0.705744	1.22919	1.38846	1.4418	0.913199	0.108427	0.533629	0.403018	0.44831	-0.368055	-1.87362	-1.04861	-2.63267
1	Nsylvestris_NODE_10977_length_1991_cov_53	RPD1_ARATH^RPD1_ARATH^Q:1850-729,H:45-409^34.211%ID^E:3.37e-61^RecName: Full=Protein ROOT PRIMORDIUM DEFECTIVE 1;^Eukaryota; Viridiplantae; Streptophyta; Embryophyta; Tracheophyta; Spermatophyta; Magnoliopsida; eudicotyledons; Gunneridae; Pentapetalae; rosids; malvids; Brassicales; Brassicaceae; Camelineae; Arabidopsis	0.905633	1.71097	0.598306	0.809292	-1.55895	1.75027	2.7986	1.6441	1.89876	0.910125	1.66044	1.05296	0.770527	0.552246	-5.16776	-5.16776	-5.16776
1	Nsylvestris_NODE_10979_length_1990_cov_195	SPL12_ARATH^SPL12_ARATH^Q:713-1309,H:9-174^41.667%ID^E:1.69e-33^RecName: Full=Squamosa promoter-binding-like protein 12;^Eukaryota; Viridiplantae; Streptophyta; Embryophyta; Tracheophyta; Spermatophyta; Magnoliopsida; eudicotyledons; Gunneridae; Pentapetalae; rosids; malvids; Brassicales; Brassicaceae; Camelineae; Arabidopsis	-0.0180931	1.04366	-0.54119	0.113342	-0.192545	1.15619	1.4741	1.27808	1.13144	-0.177272	0.715252	-0.0979231	0.551554	-0.670777	-1.86404	-1.24074	-2.66105
1	Nsylvestris_NODE_10980_length_1990_cov_194	PBRP1_ARATH^PBRP1_ARATH^Q:1859-711,H:1-385^79.016%ID^E:0^RecName: Full=Plant-specific TFIIB-related protein 1 {ECO:0000305};^Eukaryota; Viridiplantae; Streptophyta; Embryophyta; Tracheophyta; Spermatophyta; Magnoliopsida; eudicotyledons; Gunneridae; Pentapetalae; rosids; malvids; Brassicales; Brassicaceae; Camelineae; Arabidopsis	0.588778	1.63735	0.526828	1.02674	-0.116273	1.14024	1.3056	1.57555	0.796603	-0.0347268	0.666186	0.268644	0.341482	-0.471923	-2.01802	-4.54971	-2.68335
1	Nsylvestris_NODE_10981_length_1990_cov_83	.	0.674826	0.675227	0.260857	0.362882	-0.910136	1.80777	0.790303	1.22709	0.624257	-0.588208	0.505352	0.850439	1.05949	0.752829	-2.91014	-1.68774	-3.4951
1	Nsylvestris_NODE_10982_length_1990_cov_53	PLY13_ARATH^PLY13_ARATH^Q:1500-319,H:23-418^71.605%ID^E:0^RecName: Full=Probable pectate lyase 13;^Eukaryota; Viridiplantae; Streptophyta; Embryophyta; Tracheophyta; Spermatophyta; Magnoliopsida; eudicotyledons; Gunneridae; Pentapetalae; rosids; malvids; Brassicales; Brassicaceae; Camelineae; Arabidopsis	0.618783	1.75971	0.618783	0.517951	0.116986	0.478783	1.31861	0.908736	0.399453	-0.520384	-0.470208	0.438379	0.311614	-0.220096	-2.48719	-1.59528	-2.19463
1	Nsylvestris_NODE_10983_length_1990_cov_37	FBXL2_BOVIN^FBXL2_BOVIN^Q:1544-417,H:89-368^23.483%ID^E:7.88e-20^RecName: Full=F-box/LRR-repeat protein 2 {ECO:0000305};^Eukaryota; Metazoa; Chordata; Craniata; Vertebrata; Euteleostomi; Mammalia; Eutheria; Laurasiatheria; Cetartiodactyla; Ruminantia; Pecora; Bovidae; Bovinae; Bos`FBXL2_BOVIN^FBXL2_BOVIN^Q:962-426,H:81-258^26.776%ID^E:4.61e-09^RecName: Full=F-box/LRR-repeat protein 2 {ECO:0000305…	-0.716986	1.39849	1.01998	1.50541	-0.116082	0.398491	1.2932	1.82733	0.785514	-0.132024	-0.101884	0.698051	0.42706	-0.980021	-2.30195	-1.70263	-3.30195
1	Nsylvestris_NODE_10984_length_1990_cov_25	ZOG_PHALU^ZOG_PHALU^Q:1143-985,H:4-56^60.377%ID^E:1.14e-11^RecName: Full=Zeatin O-glucosyltransferase;^Eukaryota; Viridiplantae; Streptophyta; Embryophyta; Tracheophyta; Spermatophyta; Magnoliopsida; eudicotyledons; Gunneridae; Pentapetalae; rosids; fabids; Fabales; Fabaceae; Papilionoideae; 50 kb inversion clade; NPAAA clade; indigoferoid/millettioid clade; Phaseoleae; Phaseolus	-0.409738	0.740461	-0.712755	0.00529988	0.173621	1.09276	1.59026	0.227692	1.35462	0.374068	0.988065	0.153692	0.339677	0.148258	-2.57966	-1.20532	-2.281
1	Nsylvestris_NODE_10985_length_1989_cov_231	MCAC1_ARATH^MCAC1_ARATH^Q:498-1745,H:4-420^65.947%ID^E:0^RecName: Full=Protein MID1-COMPLEMENTING ACTIVITY 1;^Eukaryota; Viridiplantae; Streptophyta; Embryophyta; Tracheophyta; Spermatophyta; Magnoliopsida; eudicotyledons; Gunneridae; Pentapetalae; rosids; malvids; Brassicales; Brassicaceae; Camelineae; Arabidopsis	0.532835	1.22279	0.666911	0.916309	0.614864	2.15631	1.69758	1.82311	1.37472	0.148581	0.672784	0.991275	1.31546	0.65959	-6.18331	-5.00132	-3.60849
1	Nsylvestris_NODE_10986_length_1989_cov_230	GYP2_YEAST^GYP2_YEAST^Q:1171-254,H:240-538^31.889%ID^E:1.01e-39^RecName: Full=GTPase-activating protein GYP2;^Eukaryota; Fungi; Dikarya; Ascomycota; Saccharomycotina; Saccharomycetes; Saccharomycetales; Saccharomycetaceae; Saccharomyces	0.366543	1.58592	0.202269	0.18089	-0.388069	1.66154	1.54885	1.47202	1.08318	-0.433621	0.352487	0.520503	0.513426	0.365574	-4.07748	-2.73324	-2.22079
1	Nsylvestris_NODE_10987_length_1989_cov_225	LIP_STAHY^LIP_STAHY^Q:1395-361,H:309-640^27.882%ID^E:4.72e-25^RecName: Full=Lipase;^Bacteria; Firmicutes; Bacilli; Bacillales; Staphylococcaceae; Staphylococcus	-0.302563	0.434636	0.397327	0.369224	-0.261306	1.27821	1.34522	1.41229	1.39854	-0.0121554	0.322144	0.802794	1.00833	-0.384931	-2.65291	-2.06994	-3.08491
1	Nsylvestris_NODE_10989_length_1989_cov_159	RUTD_METPB^RUTD_METPB^Q:1666-818,H:13-257^26.829%ID^E:2.53e-12^RecName: Full=Putative aminoacrylate hydrolase RutD {ECO:0000255|HAMAP-Rule:MF_00832};^Bacteria; Proteobacteria; Alphaproteobacteria; Rhizobiales; Methylobacteriaceae; Methylorubrum	0.853881	1.36702	1.10481	1.4675	0.192166	1.58784	2.22816	1.80244	0.735926	0.101419	0.980164	0.367627	0.398388	0.14119	-6.19706	-3.6437	-3.48777
1	Nsylvestris_NODE_10991_length_1989_cov_66	C75A2_SOLME^C75A2_SOLME^Q:344-1693,H:57-503^37.939%ID^E:4.58e-102^RecName: Full=Flavonoid 3',5'-hydroxylase;^Eukaryota; Viridiplantae; Streptophyta; Embryophyta; Tracheophyta; Spermatophyta; Magnoliopsida; eudicotyledons; Gunneridae; Pentapetalae; asterids; lamiids; Solanales; Solanaceae; Solanoideae; Solaneae; Solanum	0.0476375	1.17077	-0.700464	-1.24895	-1.19489	1.81974	1.54895	1.43913	1.69279	0.688674	1.37558	0.938028	1.28949	1.34284	-2.97612	-2.50219	-4.73101
1	Nsylvestris_NODE_10994_length_1988_cov_209	ERI2_HUMAN^ERI2_HUMAN^Q:1374-811,H:38-242^42.439%ID^E:1.5e-39^RecName: Full=ERI1 exoribonuclease 2;^Eukaryota; Metazoa; Chordata; Craniata; Vertebrata; Euteleostomi; Mammalia; Eutheria; Euarchontoglires; Primates; Haplorrhini; Catarrhini; Hominidae; Homo	0.443927	1.18711	0.362234	0.700051	0.0304719	1.66655	1.37653	1.32611	1.01176	-0.0829342	0.761483	0.577653	0.561281	0.580822	-4.3028	-3.16189	-3.03835
1	Nsylvestris_NODE_10996_length_1988_cov_161	.	0.592033	1.65787	0.616014	-0.0861257	0.0533865	2.1287	2.43383	1.96762	1.63793	0.164418	1.59505	-0.664883	1.14159	0.173103	-4.47018	-4.47018	-4.47018
1	Nsylvestris_NODE_10998_length_1988_cov_106	SPEA_BACSU^SPEA_BACSU^Q:304-1764,H:7-483^33.538%ID^E:5.51e-90^RecName: Full=Arginine decarboxylase;^Bacteria; Firmicutes; Bacilli; Bacillales; Bacillaceae; Bacillus	-1.76754	-2.93906	-0.769138	0.967827	-0.617135	5.18376	4.15897	5.59329	1.76068	0.453941	1.09986	1.06206	0.868292	-0.238624	-4.93906	-4.93906	-4.93906
1	Nsylvestris_NODE_11_length_12805_cov_33	YI31B_YEAST^YI31B_YEAST^Q:7697-7272,H:636-771^41.549%ID^E:5.65e-34^RecName: Full=Transposon Ty3-I Gag-Pol polyprotein;^Eukaryota; Fungi; Dikarya; Ascomycota; Saccharomycotina; Saccharomycetes; Saccharomycetales; Saccharomycetaceae; Saccharomyces`YI31B_YEAST^YI31B_YEAST^Q:7290-6871,H:769-906^26.95%ID^E:5.65e-34^RecName: Full=Transposon Ty3-I Gag-Pol polyprotein;^Eukaryota; Fungi; Dikarya; Ascomyco…	0.424793	1.87294	0.330829	-0.902935	0.344446	3.11978	2.15367	1.69974	1.36118	-0.839979	0.850645	0.604928	0.934645	0.789016	-4.69995	-3.3438	-4.69995
1	Nsylvestris_NODE_110_length_8341_cov_59	.	0.0571239	1.58998	0.00679219	-0.500786	0.280546	2.18051	2.19252	2.04808	0.387682	-0.84334	-0.829938	0.379052	0.834731	-0.662768	-2.25198	-2.4283	-2.43989
1	Nsylvestris_NODE_11005_length_1987_cov_43	CDT1A_ARATH^CDT1A_ARATH^Q:1856-606,H:41-447^38.652%ID^E:3.96e-48^RecName: Full=CDT1-like protein a, chloroplastic;^Eukaryota; Viridiplantae; Streptophyta; Embryophyta; Tracheophyta; Spermatophyta; Magnoliopsida; eudicotyledons; Gunneridae; Pentapetalae; rosids; malvids; Brassicales; Brassicaceae; Camelineae; Arabidopsis`CDT1A_ARATH^CDT1A_ARATH^Q:586-173,H:417-560^50.694%ID^E:3.91e-37^RecName: Ful…	-0.102903	1.38252	-0.424831	0.382524	1.16013	2.61956	1.66263	1.8971	-1.42483	-0.102903	-0.839868	0.745094	1.74509	-1.42483	-2.42483	-2.42483	-2.42483
1	Nsylvestris_NODE_11006_length_1987_cov_32	.	0.0527749	1.63774	0.637737	-0.461798	-0.684191	1.05277	1.12316	0.538202	1.9403	-0.269153	1.58883	0.0527749	-0.0992281	0.315809	-3.26915	-2.2548	-1.90178
1	Nsylvestris_NODE_11007_length_1987_cov_21	.	0.165386	0.933809	0.546786	-1.56869	1.09427	2.0558	1.6537	0.846346	1.4902	-0.346299	0.431309	1.30578	0.546786	0.305778	-3.15365	-3.15365	-3.15365
1	Nsylvestris_NODE_11008_length_1987_cov_16	.	-0.156124	0.374391	-0.326049	-1.00412	-0.00412045	1.06627	1.95935	1.42884	0.711334	-1.00412	0.374391	-0.741086	0.258914	0.133383	-0.741086	-1.32605	-1.00412
1	Nsylvestris_NODE_11014_length_1986_cov_149	CCD22_RAT^CCD22_RAT^Q:872-1471,H:400-600^33.333%ID^E:9.85e-18^RecName: Full=Coiled-coil domain-containing protein 22 {ECO:0000250|UniProtKB:O60826};^Eukaryota; Metazoa; Chordata; Craniata; Vertebrata; Euteleostomi; Mammalia; Eutheria; Euarchontoglires; Glires; Rodentia; Myomorpha; Muroidea; Muridae; Murinae; Rattus`CCD22_RAT^CCD22_RAT^Q:41-370,H:7-116^32.143%ID^E:1.18e-08^RecName: Full=Coiled-coi…	-0.0343409	1.27088	0.660924	0.55167	0.354846	1.39469	1.41874	1.20714	0.29574	0.12554	-0.00994533	0.246496	0.135111	-0.083831	-1.728	-2.37751	-3.42814
1	Nsylvestris_NODE_11016_length_1986_cov_68	RPC4_MOUSE^RPC4_MOUSE^Q:705-238,H:257-396^30.189%ID^E:4.01e-11^RecName: Full=DNA-directed RNA polymerase III subunit RPC4;^Eukaryota; Metazoa; Chordata; Craniata; Vertebrata; Euteleostomi; Mammalia; Eutheria; Euarchontoglires; Glires; Rodentia; Myomorpha; Muroidea; Muridae; Murinae; Mus; Mus	-0.293947	1.23512	0.216003	-1.32015	-1.03091	2.69828	1.28957	1.63129	1.52613	-0.999988	-0.0213262	0.390423	1.1358	0.384125	-1.61587	-2.60868	-2.61587
1	Nsylvestris_NODE_11017_length_1986_cov_29	PGLR4_ARATH^PGLR4_ARATH^Q:590-1765,H:74-463^60.969%ID^E:4.67e-179^RecName: Full=Polygalacturonase At1g48100;^Eukaryota; Viridiplantae; Streptophyta; Embryophyta; Tracheophyta; Spermatophyta; Magnoliopsida; eudicotyledons; Gunneridae; Pentapetalae; rosids; malvids; Brassicales; Brassicaceae; Camelineae; Arabidopsis	0.57639	1.49274	0.368829	0.946741	1.31336	-0.523145	0.128931	-0.160575	2.05009	0.337392	1.9549	0.476855	0.476855	0.552143	-3.3305	-3.3305	-3.3305
1	Nsylvestris_NODE_11021_length_1984_cov_216	STY13_ARATH^STY13_ARATH^Q:1499-330,H:25-411^78.626%ID^E:0^RecName: Full=Serine/threonine-protein kinase STY13 {ECO:0000305};^Eukaryota; Viridiplantae; Streptophyta; Embryophyta; Tracheophyta; Spermatophyta; Magnoliopsida; eudicotyledons; Gunneridae; Pentapetalae; rosids; malvids; Brassicales; Brassicaceae; Camelineae; Arabidopsis	0.678334	1.40969	0.608914	1.25676	-0.429261	1.53195	2.09003	2.03897	1.11496	0.716454	0.734356	0.61806	0.51783	0.497007	-4.52946	-4.39681	-4.45778
1	Nsylvestris_NODE_11025_length_1984_cov_146	FB252_ARATH^FB252_ARATH^Q:1746-412,H:46-493^75.501%ID^E:0^RecName: Full=F-box protein At5g06550;^Eukaryota; Viridiplantae; Streptophyta; Embryophyta; Tracheophyta; Spermatophyta; Magnoliopsida; eudicotyledons; Gunneridae; Pentapetalae; rosids; malvids; Brassicales; Brassicaceae; Camelineae; Arabidopsis	0.463869	1.48996	0.282794	1.15807	-0.246482	1.41233	1.77649	1.97006	1.0277	0.570206	1.00855	0.220528	0.423335	0.285292	-4.19161	-4.17778	-3.47329
1	Nsylvestris_NODE_11027_length_1984_cov_113	.	0.59375	1.67994	0.279923	0.898254	-0.378373	1.32886	1.29964	1.1077	0.671621	-0.549576	1.02633	0.390243	-0.69678	0.112243	-2.86818	-2.19849	-2.6971
1	Nsylvestris_NODE_11031_length_1983_cov_219	ODPB1_ORYSJ^ODPB1_ORYSJ^Q:456-1475,H:39-374^90.294%ID^E:0^RecName: Full=Pyruvate dehydrogenase E1 component subunit beta-1, mitochondrial;^Eukaryota; Viridiplantae; Streptophyta; Embryophyta; Tracheophyta; Spermatophyta; Magnoliopsida; Liliopsida; Poales; Poaceae; BOP clade; Oryzoideae; Oryzeae; Oryzinae; Oryza; Oryza sativa	0.208168	1.09998	0.0855417	0.509978	-0.220308	0.866449	1.02236	1.2934	0.912917	0.0502964	0.528571	0.197441	0.0706686	-0.367909	-1.45847	-1.98657	-2.81251
1	Nsylvestris_NODE_11034_length_1983_cov_115	PTP1_ARATH^PTP1_ARATH^Q:1097-600,H:171-336^75.904%ID^E:2.8e-86^RecName: Full=Protein-tyrosine-phosphatase PTP1;^Eukaryota; Viridiplantae; Streptophyta; Embryophyta; Tracheophyta; Spermatophyta; Magnoliopsida; eudicotyledons; Gunneridae; Pentapetalae; rosids; malvids; Brassicales; Brassicaceae; Camelineae; Arabidopsis	-0.184655	1.15681	-0.128281	0.417083	0.166054	1.65559	0.743816	1.00419	0.836521	-1.13072	0.215389	-0.610581	0.361214	-0.688935	-0.877117	-1.33064	-1.60573
1	Nsylvestris_NODE_11037_length_1983_cov_39	.	-0.500155	1.08556	0.10576	-0.368419	-0.00378598	1.21861	0.73318	0.148217	1.25255	-0.376698	0.285721	0.0200608	1.43569	0.445702	-1.13457	-2.17371	-2.17371
1	Nsylvestris_NODE_11038_length_1983_cov_32	.	-1.40359	1.40376	0.181368	0.403761	-1.40359	1.76633	1.98872	0.596406	0.596406	1.29685	0.766331	-0.818632	1.91833	-0.0816659	-2.40359	-2.40359	-2.40359
1	Nsylvestris_NODE_11039_length_1983_cov_22	.	0.550275	1.61378	0.0962438	-1.33869	0.260769	2.33839	1.56138	0.791284	0.0908438	0.0653732	0.790173	-0.204284	0.0908438	-0.96805	-2.90916	-1.90916	-0.920017
1	Nsylvestris_NODE_11046_length_1982_cov_92	KTNB1_HUMAN^KTNB1_HUMAN^Q:794-1540,H:21-252^25.391%ID^E:7e-07^RecName: Full=Katanin p80 WD40 repeat-containing subunit B1 {ECO:0000255|HAMAP-Rule:MF_03022};^Eukaryota; Metazoa; Chordata; Craniata; Vertebrata; Euteleostomi; Mammalia; Eutheria; Euarchontoglires; Primates; Haplorrhini; Catarrhini; Hominidae; Homo	0.0611147	1.32922	0.267851	0.386941	-0.952755	1.70925	1.90758	1.34885	1.04604	0.425165	0.82337	1.28873	0.894547	0.46096	-3.86061	-3.27564	-3.86061
1	Nsylvestris_NODE_11048_length_1982_cov_37	SSH4_COCIM^SSH4_COCIM^Q:1018-1506,H:220-378^28.324%ID^E:1.73e-06^RecName: Full=Protein SSH4;^Eukaryota; Fungi; Dikarya; Ascomycota; Pezizomycotina; Eurotiomycetes; Eurotiomycetidae; Onygenales; Onygenales incertae sedis; Coccidioides	0.4287	0.969268	0.669708	0.430011	0.554231	2.39553	2.46112	1.96927	0.139193	-2.03073	0.969268	1.2912	-1.44577	0.291196	-3.03073	-3.03073	-3.03073
1	Nsylvestris_NODE_11049_length_1981_cov_221	DTX27_ARATH^DTX27_ARATH^Q:247-1626,H:24-483^71.522%ID^E:0^RecName: Full=Protein DETOXIFICATION 27 {ECO:0000303|PubMed:11739388};^Eukaryota; Viridiplantae; Streptophyta; Embryophyta; Tracheophyta; Spermatophyta; Magnoliopsida; eudicotyledons; Gunneridae; Pentapetalae; rosids; malvids; Brassicales; Brassicaceae; Camelineae; Arabidopsis	0.0875863	0.849794	0.00723255	0.00103993	-0.321847	0.95077	2.06431	1.93015	1.16065	0.10592	1.20591	-0.608962	-0.273282	-1.05175	-2.07773	-2.42638	-1.6034
1	Nsylvestris_NODE_1105_length_4819_cov_49	.	0.0780172	0.993597	0.291313	0.529253	-0.673963	1.23926	1.07093	0.583238	1.32409	0.211273	1.04895	0.0552018	0.309842	-0.0598375	-2.3193	-2.03564	-2.64622
1	Nsylvestris_NODE_11050_length_1981_cov_221	C82C4_ARATH^C82C4_ARATH^Q:1798-362,H:37-523^44.625%ID^E:2.92e-141^RecName: Full=Xanthotoxin 5-hydroxylase CYP82C4 {ECO:0000305|PubMed:18291319};^Eukaryota; Viridiplantae; Streptophyta; Embryophyta; Tracheophyta; Spermatophyta; Magnoliopsida; eudicotyledons; Gunneridae; Pentapetalae; rosids; malvids; Brassicales; Brassicaceae; Camelineae; Arabidopsis	0.435853	1.27068	0.502302	0.152652	0.592648	1.91089	1.52774	2.06481	0.383019	-0.061625	-0.0144046	-0.131961	-0.441161	0.255105	-1.53948	-2.5558	-4.35127
1	Nsylvestris_NODE_11051_length_1981_cov_175	ACT1_TOBAC^ACT1_TOBAC^Q:661-1791,H:1-377^98.408%ID^E:0^RecName: Full=Actin;^Eukaryota; Viridiplantae; Streptophyta; Embryophyta; Tracheophyta; Spermatophyta; Magnoliopsida; eudicotyledons; Gunneridae; Pentapetalae; asterids; lamiids; Solanales; Solanaceae; Nicotianoideae; Nicotianeae; Nicotiana	0.957616	4.38642	2.01866	0.0400782	1.95996	0.261332	-1.6101	-0.884859	2.11009	-2.47487	-1.49527	1.09397	0.723454	-1.17231	-1.7228	-3.98584	-0.205526
1	Nsylvestris_NODE_11053_length_1981_cov_144	PAE8_ARATH^PAE8_ARATH^Q:200-1342,H:9-385^55.906%ID^E:3.17e-153^RecName: Full=Pectin acetylesterase 8 {ECO:0000303|PubMed:25115560};^Eukaryota; Viridiplantae; Streptophyta; Embryophyta; Tracheophyta; Spermatophyta; Magnoliopsida; eudicotyledons; Gunneridae; Pentapetalae; rosids; malvids; Brassicales; Brassicaceae; Camelineae; Arabidopsis	0.595211	-0.409606	-0.865424	1.60001	0.349386	3.0255	3.17576	2.53004	0.332176	1.01025	-0.404789	-0.989752	-1.98975	-1.98975	-1.98975	-1.98975	-1.98975
1	Nsylvestris_NODE_11056_length_1981_cov_68	AT74H_ARATH^AT74H_ARATH^Q:1578-766,H:8-281^48.905%ID^E:2.21e-90^RecName: Full=Phosphoglycerate mutase-like protein AT74H {ECO:0000305};^Eukaryota; Viridiplantae; Streptophyta; Embryophyta; Tracheophyta; Spermatophyta; Magnoliopsida; eudicotyledons; Gunneridae; Pentapetalae; rosids; malvids; Brassicales; Brassicaceae; Camelineae; Arabidopsis	0.761376	-0.0876226	0.213965	-0.50266	2.55623	1.43594	1.68637	-0.0876226	0.612817	0.234306	1.86657	-0.0876226	0.0823024	-1.96993	-1.50266	-2.12415	-3.08762
1	Nsylvestris_NODE_11057_length_1981_cov_62	DTX40_ARATH^DTX40_ARATH^Q:1981-1268,H:29-236^63.445%ID^E:2.16e-170^RecName: Full=Protein DETOXIFICATION 40 {ECO:0000303|PubMed:11739388};^Eukaryota; Viridiplantae; Streptophyta; Embryophyta; Tracheophyta; Spermatophyta; Magnoliopsida; eudicotyledons; Gunneridae; Pentapetalae; rosids; malvids; Brassicales; Brassicaceae; Camelineae; Arabidopsis`DTX40_ARATH^DTX40_ARATH^Q:1272-736,H:234-412^70.391%ID…	0.146737	0.895351	0.162169	0.322898	-0.258438	2.05862	2.8026	1.88103	1.3747	0.879819	0.423234	1.6748	1.64089	1.693	-5.44166	-4.82125	-5.4345
1	Nsylvestris_NODE_11058_length_1981_cov_42	NLTL2_ARATH^NLTL2_ARATH^Q:218-697,H:6-169^31.515%ID^E:2.99e-16^RecName: Full=Non-specific lipid-transfer protein-like protein At2g13820;^Eukaryota; Viridiplantae; Streptophyta; Embryophyta; Tracheophyta; Spermatophyta; Magnoliopsida; eudicotyledons; Gunneridae; Pentapetalae; rosids; malvids; Brassicales; Brassicaceae; Camelineae; Arabidopsis	0.0107744	0.425812	0.74774	0.233167	-2.57419	1.81813	1.88524	1.23317	-0.25226	0.233167	0.74774	-0.25226	0.233167	0.233167	-1.57419	-0.574188	-2.57419
1	Nsylvestris_NODE_11059_length_1981_cov_16	PP435_ARATH^PP435_ARATH^Q:1892-288,H:2-532^54.206%ID^E:0^RecName: Full=Putative pentatricopeptide repeat-containing protein At5g59200, chloroplastic;^Eukaryota; Viridiplantae; Streptophyta; Embryophyta; Tracheophyta; Spermatophyta; Magnoliopsida; eudicotyledons; Gunneridae; Pentapetalae; rosids; malvids; Brassicales; Brassicaceae; Camelineae; Arabidopsis	-0.496735	0.618743	0.609279	0.441865	-0.331091	0.918303	0.377735	0.228643	1.35926	0.459322	0.709596	0.00576582	-1.05136	1.048	-1.44246	-1.39464	-2.06022
1	Nsylvestris_NODE_11065_length_1980_cov_194	UBC38_ARATH^UBC38_ARATH^Q:788-1540,H:45-296^58.73%ID^E:1.7e-99^RecName: Full=Putative ubiquitin-conjugating enzyme E2 38;^Eukaryota; Viridiplantae; Streptophyta; Embryophyta; Tracheophyta; Spermatophyta; Magnoliopsida; eudicotyledons; Gunneridae; Pentapetalae; rosids; malvids; Brassicales; Brassicaceae; Camelineae; Arabidopsis	0.258524	1.12448	0.0144897	0.266103	-0.100816	1.60058	0.748828	1.09711	0.137878	-0.0331661	0.102328	0.507451	0.279585	0.0959619	-1.97766	-2.08928	-2.03239
1	Nsylvestris_NODE_11068_length_1980_cov_135	CIA2_ARATH^CIA2_ARATH^Q:1184-63,H:3-385^36.591%ID^E:5.1e-34^RecName: Full=Protein CHLOROPLAST IMPORT APPARATUS 2;^Eukaryota; Viridiplantae; Streptophyta; Embryophyta; Tracheophyta; Spermatophyta; Magnoliopsida; eudicotyledons; Gunneridae; Pentapetalae; rosids; malvids; Brassicales; Brassicaceae; Camelineae; Arabidopsis	0.50197	2.04901	-0.0257243	0.470575	0.956477	1.25556	1.93154	1.47179	1.88708	1.09235	1.44821	0.971769	1.11084	1.01791	-5.03578	-5.55179	-5.55179
1	Nsylvestris_NODE_11075_length_1979_cov_148	EMB8_PICGL^EMB8_PICGL^Q:1953-925,H:17-359^58.757%ID^E:1.25e-104^RecName: Full=Embryogenesis-associated protein EMB8;^Eukaryota; Viridiplantae; Streptophyta; Embryophyta; Tracheophyta; Spermatophyta; Pinidae; Pinales; Pinaceae; Picea	0.244716	1.23947	0.390749	0.411993	-0.46305	1.00065	1.184	1.16345	0.55867	-0.267456	0.935661	0.326956	0.063969	-0.147937	-1.61467	-2.81003	-2.21715
1	Nsylvestris_NODE_11076_length_1979_cov_137	GOS11_ARATH^GOS11_ARATH^Q:1878-1627,H:1-87^72.414%ID^E:2.5e-34^RecName: Full=Golgi SNAP receptor complex member 1-1;^Eukaryota; Viridiplantae; Streptophyta; Embryophyta; Tracheophyta; Spermatophyta; Magnoliopsida; eudicotyledons; Gunneridae; Pentapetalae; rosids; malvids; Brassicales; Brassicaceae; Camelineae; Arabidopsis	0.216795	1.37888	0.444369	0.9569	0.298566	1.92048	2.41991	1.46932	0.777881	0.0661369	0.889496	0.468491	0.884765	0.44101	-5.24493	-3.69403	-3.69403
1	Nsylvestris_NODE_11079_length_1979_cov_115	GAM1_ORYSI^GAM1_ORYSI^Q:1506-424,H:4-387^43.655%ID^E:1.72e-84^RecName: Full=Transcription factor GAMYB;^Eukaryota; Viridiplantae; Streptophyta; Embryophyta; Tracheophyta; Spermatophyta; Magnoliopsida; Liliopsida; Poales; Poaceae; BOP clade; Oryzoideae; Oryzeae; Oryzinae; Oryza; Oryza sativa	0.890905	1.66946	0.685251	0.472327	0.101817	1.89476	2.32772	2.04293	1.05374	0.153778	0.884865	1.06746	0.769226	1.02217	-5.01213	-5.01213	-5.01213
1	Nsylvestris_NODE_11080_length_1978_cov_228	EDL16_ARATH^EDL16_ARATH^Q:1786-338,H:1-482^68.443%ID^E:0^RecName: Full=Sugar transporter ERD6-like 16;^Eukaryota; Viridiplantae; Streptophyta; Embryophyta; Tracheophyta; Spermatophyta; Magnoliopsida; eudicotyledons; Gunneridae; Pentapetalae; rosids; malvids; Brassicales; Brassicaceae; Camelineae; Arabidopsis	0.347649	1.74467	0.774609	0.579424	-0.0496809	1.96095	1.54377	0.370253	2.30963	1.18227	0.96784	1.33118	2.48183	0.86969	-4.79915	-5.37754	-6.2374
1	Nsylvestris_NODE_11083_length_1978_cov_204	ZDHC9_ARATH^ZDHC9_ARATH^Q:1504-488,H:10-342^57.227%ID^E:3.18e-115^RecName: Full=Probable protein S-acyltransferase 7;^Eukaryota; Viridiplantae; Streptophyta; Embryophyta; Tracheophyta; Spermatophyta; Magnoliopsida; eudicotyledons; Gunneridae; Pentapetalae; rosids; malvids; Brassicales; Brassicaceae; Camelineae; Arabidopsis	-1.72257	1.30836	-1.54707	-3.58387	-1.56832	2.79696	3.04816	2.7779	2.58779	1.58699	2.34253	1.89801	2.06191	1.49821	-4.14735	-5.16883	-4.16883
1	Nsylvestris_NODE_11087_length_1978_cov_66	PT505_ARATH^PT505_ARATH^Q:279-719,H:3-149^84.354%ID^E:1.01e-80^RecName: Full=Probable sugar phosphate/phosphate translocator At5g05820;^Eukaryota; Viridiplantae; Streptophyta; Embryophyta; Tracheophyta; Spermatophyta; Magnoliopsida; eudicotyledons; Gunneridae; Pentapetalae; rosids; malvids; Brassicales; Brassicaceae; Camelineae; Arabidopsis	0.0331176	1.24125	-0.92034	0.191963	0.298777	1.63402	1.29155	0.424308	1.19337	-0.686867	0.198305	0.158386	0.496986	0.372909	-1.23655	-2.15346	-2.53772
1	Nsylvestris_NODE_11088_length_1978_cov_60	SPL6_ARATH^SPL6_ARATH^Q:1306-1031,H:107-198^77.174%ID^E:8.62e-42^RecName: Full=Squamosa promoter-binding-like protein 6;^Eukaryota; Viridiplantae; Streptophyta; Embryophyta; Tracheophyta; Spermatophyta; Magnoliopsida; eudicotyledons; Gunneridae; Pentapetalae; rosids; malvids; Brassicales; Brassicaceae; Camelineae; Arabidopsis	-0.80246	0.576051	0.19754	0.19754	-0.539426	1.19754	1.46057	1.12354	0.963074	-0.539426	-1.12439	0.19754	-0.124388	-0.124388	-1.53943	-0.80246	-0.317034
1	Nsylvestris_NODE_11092_length_1977_cov_181	.	1.01687	1.30876	0.719634	1.14443	-0.144212	1.98868	2.43934	2.41092	0.670836	0.330934	0.880257	0.410628	0.477677	1.03002	-5.24014	-5.24014	-4.20451
1	Nsylvestris_NODE_11094_length_1977_cov_63	NFD4_ARATH^NFD4_ARATH^Q:1043-333,H:346-565^28.452%ID^E:5.14e-11^RecName: Full=Protein NUCLEAR FUSION DEFECTIVE 4 {ECO:0000303|PubMed:16698901};^Eukaryota; Viridiplantae; Streptophyta; Embryophyta; Tracheophyta; Spermatophyta; Magnoliopsida; eudicotyledons; Gunneridae; Pentapetalae; rosids; malvids; Brassicales; Brassicaceae; Camelineae; Arabidopsis`NFD4_ARATH^NFD4_ARATH^Q:1949-1587,H:77-196^30.32…	1.76475	2.41326	0.999115	0.752788	0.130593	1.57151	1.15326	1.30847	-1.10528	-1.95225	0.489895	-0.017065	0.811653	0.445978	-2.56985	-2.59842	-3.59842
1	Nsylvestris_NODE_11095_length_1977_cov_26	.	-0.213663	0.30091	0.885873	0.885873	1.3713	1.14891	1.56394	1.43841	1.56455	0.679422	-0.69909	-0.436055	0.786337	-0.213663	-3.02102	-3.02102	-3.02102
1	Nsylvestris_NODE_11104_length_1975_cov_212	PP176_ARATH^PP176_ARATH^Q:1452-112,H:48-503^61.572%ID^E:0^RecName: Full=Pentatricopeptide repeat-containing protein At2g30100, chloroplastic;^Eukaryota; Viridiplantae; Streptophyta; Embryophyta; Tracheophyta; Spermatophyta; Magnoliopsida; eudicotyledons; Gunneridae; Pentapetalae; rosids; malvids; Brassicales; Brassicaceae; Camelineae; Arabidopsis	0.538301	1.42816	0.499116	0.510544	-0.154	1.23044	1.24644	1.35912	1.16448	0.0933619	0.843242	0.359188	-0.0341219	-0.318237	-2.41478	-3.11943	-3.23182
1	Nsylvestris_NODE_11113_length_1974_cov_193	Y3913_ARATH^Y3913_ARATH^Q:978-250,H:266-497^50%ID^E:1.32e-73^RecName: Full=Uncharacterized protein At3g49140;^Eukaryota; Viridiplantae; Streptophyta; Embryophyta; Tracheophyta; Spermatophyta; Magnoliopsida; eudicotyledons; Gunneridae; Pentapetalae; rosids; malvids; Brassicales; Brassicaceae; Camelineae; Arabidopsis`Y3913_ARATH^Y3913_ARATH^Q:1548-1156,H:77-206^52.672%ID^E:1.71e-37^RecName: Full=Un…	-0.0921626	1.06853	0.825479	0.608685	0.441866	1.18155	1.20463	1.20721	1.07116	0.11202	0.695703	0.45287	0.49044	0.314876	-3.54878	-3.16722	-2.86686
1	Nsylvestris_NODE_11121_length_1973_cov_209	IF2G_RAT^IF2G_RAT^Q:173-1528,H:15-465^73.673%ID^E:0^RecName: Full=Eukaryotic translation initiation factor 2 subunit 3, X-linked;^Eukaryota; Metazoa; Chordata; Craniata; Vertebrata; Euteleostomi; Mammalia; Eutheria; Euarchontoglires; Glires; Rodentia; Myomorpha; Muroidea; Muridae; Murinae; Rattus	0.378684	1.37134	0.545703	0.805889	-0.176824	1.68617	1.7849	1.66694	1.13263	0.298939	0.887737	0.85108	0.778326	-0.109601	-3.50403	-4.05331	-4.34458
1	Nsylvestris_NODE_11124_length_1973_cov_167	LIIP1_ARATH^LIIP1_ARATH^Q:660-1631,H:12-342^75.904%ID^E:3.11e-128^RecName: Full=Small GTPase LIP1 {ECO:0000303|PubMed:17683937};^Eukaryota; Viridiplantae; Streptophyta; Embryophyta; Tracheophyta; Spermatophyta; Magnoliopsida; eudicotyledons; Gunneridae; Pentapetalae; rosids; malvids; Brassicales; Brassicaceae; Camelineae; Arabidopsis	0.0893454	0.71489	0.258412	0.581244	-0.646257	0.812625	1.53577	1.11353	0.939218	0.378096	0.699105	0.580634	0.718607	-0.117959	-2.29296	-2.7866	-2.5777
1	Nsylvestris_NODE_11126_length_1973_cov_62	SCL3_ARATH^SCL3_ARATH^Q:1608-190,H:1-482^65.217%ID^E:0^RecName: Full=Scarecrow-like protein 3 {ECO:0000303|PubMed:10341448};^Eukaryota; Viridiplantae; Streptophyta; Embryophyta; Tracheophyta; Spermatophyta; Magnoliopsida; eudicotyledons; Gunneridae; Pentapetalae; rosids; malvids; Brassicales; Brassicaceae; Camelineae; Arabidopsis	0.774446	2.3738	0.961043	1.75826	0.145039	1.3306	1.68207	0.996176	1.3918	0.355583	1.33754	0.76466	0.679205	0.786827	-5.11235	-5.11235	-5.11235
1	Nsylvestris_NODE_11127_length_1972_cov_209	AP4M_ARATH^AP4M_ARATH^Q:1810-452,H:1-451^86.093%ID^E:0^RecName: Full=AP-4 complex subunit mu;^Eukaryota; Viridiplantae; Streptophyta; Embryophyta; Tracheophyta; Spermatophyta; Magnoliopsida; eudicotyledons; Gunneridae; Pentapetalae; rosids; malvids; Brassicales; Brassicaceae; Camelineae; Arabidopsis	-0.0714942	0.862202	-0.0943233	0.260622	-0.735046	0.737448	0.780818	1.16221	0.730455	-0.101009	0.428715	0.192965	-0.000310292	-0.179409	-1.47369	-1.36461	-1.13555
1	Nsylvestris_NODE_11128_length_1972_cov_111	RCE1_ARATH^RCE1_ARATH^Q:1063-1611,H:1-184^86.413%ID^E:1.41e-112^RecName: Full=NEDD8-conjugating enzyme Ubc12;^Eukaryota; Viridiplantae; Streptophyta; Embryophyta; Tracheophyta; Spermatophyta; Magnoliopsida; eudicotyledons; Gunneridae; Pentapetalae; rosids; malvids; Brassicales; Brassicaceae; Camelineae; Arabidopsis	0.0605172	0.704617	0.0150883	0.73442	-0.284445	1.23946	1.25431	0.727584	0.749044	-0.499955	0.0453178	0.0825339	0.564085	-0.196484	-1.83283	-1.45043	-1.91283
1	Nsylvestris_NODE_11129_length_1972_cov_80	.	-0.538838	1.49577	0.173384	0.174523	-0.648102	1.55327	1.46241	1.88512	0.478491	-0.412529	0.406594	1.04301	0.693571	0.843691	-2.16999	-3.07664	-3.36373
1	Nsylvestris_NODE_1113_length_4810_cov_131	AB10C_ARATH^AB10C_ARATH^Q:3871-80,H:184-1446^59.037%ID^E:0^RecName: Full=ABC transporter C family member 10;^Eukaryota; Viridiplantae; Streptophyta; Embryophyta; Tracheophyta; Spermatophyta; Magnoliopsida; eudicotyledons; Gunneridae; Pentapetalae; rosids; malvids; Brassicales; Brassicaceae; Camelineae; Arabidopsis	0.142881	1.24669	1.1656	-0.385063	0.669666	2.14656	1.7841	2.25499	0.403194	-0.365839	0.676227	-0.428591	0.159626	-0.0487868	-3.9784	-2.18485	-3.25801
1	Nsylvestris_NODE_11130_length_1972_cov_60	.	-0.885037	0.712375	-0.167827	0.329088	-1.622	0.865998	2.04096	-0.885037	2.51659	1.09901	2.10918	1.05982	0.701848	0.209875	-1.67091	-3.20697	-3.20697
1	Nsylvestris_NODE_11134_length_1971_cov_126	ACR4_ARATH^ACR4_ARATH^Q:1648-323,H:1-448^73.333%ID^E:0^RecName: Full=ACT domain-containing protein ACR4 {ECO:0000305};^Eukaryota; Viridiplantae; Streptophyta; Embryophyta; Tracheophyta; Spermatophyta; Magnoliopsida; eudicotyledons; Gunneridae; Pentapetalae; rosids; malvids; Brassicales; Brassicaceae; Camelineae; Arabidopsis	0.791115	2.24334	0.981607	0.582922	0.15203	1.71288	2.10776	1.94465	1.25401	0.147434	0.269568	0.757379	1.32579	0.019566	-5.74835	-4.63732	-3.90437
1	Nsylvestris_NODE_11137_length_1971_cov_73	.	-0.0891435	0.162395	0.273427	0.325894	-0.57457	1.9448	2.51854	0.977971	1.76761	0.0421011	1.89358	0.910857	0.727992	-0.0220293	-3.48146	-4.48146	-2.8965
1	Nsylvestris_NODE_1114_length_4809_cov_126	NUP58_ARATH^NUP58_ARATH^Q:541-1599,H:94-449^66.205%ID^E:4.07e-135^RecName: Full=Nuclear pore complex protein NUP58 {ECO:0000303|PubMed:21189294};^Eukaryota; Viridiplantae; Streptophyta; Embryophyta; Tracheophyta; Spermatophyta; Magnoliopsida; eudicotyledons; Gunneridae; Pentapetalae; rosids; malvids; Brassicales; Brassicaceae; Camelineae; Arabidopsis	0.32511	1.38962	0.513433	0.586863	-0.772147	1.04821	1.18071	1.64516	0.587849	0.067139	0.0605498	0.48768	0.281298	0.423199	-2.27608	-2.7082	-2.84039
1	Nsylvestris_NODE_11140_length_1970_cov_184	FZR3_ARATH^FZR3_ARATH^Q:1736-264,H:8-481^75.25%ID^E:0^RecName: Full=Protein FIZZY-RELATED 3;^Eukaryota; Viridiplantae; Streptophyta; Embryophyta; Tracheophyta; Spermatophyta; Magnoliopsida; eudicotyledons; Gunneridae; Pentapetalae; rosids; malvids; Brassicales; Brassicaceae; Camelineae; Arabidopsis	-0.000446786	1.02606	-0.314237	0.230728	-1.29187	1.6224	1.17762	1.17762	0.340757	-1.02699	0.808591	0.177616	0.0251678	-0.460615	-2.14031	0.226085	-1.57817
1	Nsylvestris_NODE_11142_length_1970_cov_78	.	1.12472	2.49395	-0.138316	0.999188	-0.138316	2.47427	1.99919	0.999188	0.999188	-1.46024	0.823678	-1.46024	-0.460244	-0.875281	-2.46024	-2.46024	-2.46024
1	Nsylvestris_NODE_11144_length_1969_cov_209	ENT3_ARATH^ENT3_ARATH^Q:1531-317,H:12-414^71.111%ID^E:0^RecName: Full=Equilibrative nucleotide transporter 3;^Eukaryota; Viridiplantae; Streptophyta; Embryophyta; Tracheophyta; Spermatophyta; Magnoliopsida; eudicotyledons; Gunneridae; Pentapetalae; rosids; malvids; Brassicales; Brassicaceae; Camelineae; Arabidopsis	0.381456	1.0375	1.54652	1.19504	1.52689	1.93698	3.36475	2.02286	1.21579	0.90205	-0.351871	-1.85558	0.466345	-1.34101	-4.66294	-4.66294	-2.72183
1	Nsylvestris_NODE_11145_length_1969_cov_206	C7A12_PANGI^C7A12_PANGI^Q:177-1550,H:42-500^51.94%ID^E:1.08e-168^RecName: Full=Cytochrome P450 CYP736A12;^Eukaryota; Viridiplantae; Streptophyta; Embryophyta; Tracheophyta; Spermatophyta; Magnoliopsida; eudicotyledons; Gunneridae; Pentapetalae; asterids; campanulids; Apiales; Araliaceae; Panax	0.149876	0.132899	-0.404471	-0.960045	-0.685169	2.73964	2.94609	2.66163	1.8281	0.519189	1.32343	1.95889	2.11851	1.29764	-5.20873	-5.20873	-5.20873
1	Nsylvestris_NODE_11150_length_1968_cov_14	.	-0.358842	0.86355	0.0561952	1.22612	-2.9438	1.75663	2.26565	2.30412	0.262526	-0.13645	-0.142646	-0.358842	1.22612	0.22612	-1.9438	-2.9438	-1.35884
1	Nsylvestris_NODE_11156_length_1968_cov_27	ZPR4_ARATH^ZPR4_ARATH^Q:890-747,H:1-48^56.25%ID^E:8.18e-07^RecName: Full=Protein LITTLE ZIPPER 4 {ECO:0000303|PubMed:18055602};^Eukaryota; Viridiplantae; Streptophyta; Embryophyta; Tracheophyta; Spermatophyta; Magnoliopsida; eudicotyledons; Gunneridae; Pentapetalae; rosids; malvids; Brassicales; Brassicaceae; Camelineae; Arabidopsis	0.754111	2.0142	1.57259	2.20801	1.19115	1.07231	1.3341	1.42379	0.921967	-0.543828	-1.1534	-1.40162	0.352655	-0.224953	-1.94974	-3.78567	-3.78567
1	Nsylvestris_NODE_11157_length_1968_cov_20	.	0.685429	1.10047	-0.314571	-0.899534	-0.0250647	1.76343	2.68543	1.32286	1.60297	0.322859	1.90782	-0.484496	0.685429	0.100466	-3.4845	-3.4845	-3.4845
1	Nsylvestris_NODE_1116_length_4804_cov_193	.	0.261492	1.33806	-0.195271	-0.020609	-1.09804	1.08026	1.08987	0.695952	0.978598	0.0305731	0.516522	0.320406	0.714991	0.463409	-1.77612	-2.42653	-1.97356
1	Nsylvestris_NODE_11162_length_1967_cov_129	PME51_ARATH^PME51_ARATH^Q:1676-150,H:40-551^63.548%ID^E:0^RecName: Full=Probable pectinesterase/pectinesterase inhibitor 51;^Eukaryota; Viridiplantae; Streptophyta; Embryophyta; Tracheophyta; Spermatophyta; Magnoliopsida; eudicotyledons; Gunneridae; Pentapetalae; rosids; malvids; Brassicales; Brassicaceae; Camelineae; Arabidopsis	0.112646	0.831189	-0.0754938	-0.0494673	-1.24323	1.58784	1.43304	1.66584	1.02518	0.413902	0.919635	0.426182	-0.0346411	0.854963	-2.33946	-1.97991	-3.54822
1	Nsylvestris_NODE_11168_length_1966_cov_93	PSUG_CLOBL^PSUG_CLOBL^Q:184-774,H:4-200^57.868%ID^E:5.18e-68^RecName: Full=Pseudouridine-5'-phosphate glycosidase {ECO:0000255|HAMAP-Rule:MF_01876};^Bacteria; Firmicutes; Clostridia; Clostridiales; Clostridiaceae; Clostridium	0.909209	2.27493	1.04826	0.995782	0.265773	1.55574	1.95215	1.91312	0.65247	0.278256	1.38237	0.441517	1.08986	0.266064	-4.2995	-5.363	-5.363
1	Nsylvestris_NODE_11169_length_1966_cov_54	HFA6B_ARATH^HFA6B_ARATH^Q:941-456,H:121-280^67.901%ID^E:1.72e-89^RecName: Full=Heat stress transcription factor A-6b;^Eukaryota; Viridiplantae; Streptophyta; Embryophyta; Tracheophyta; Spermatophyta; Magnoliopsida; eudicotyledons; Gunneridae; Pentapetalae; rosids; malvids; Brassicales; Brassicaceae; Camelineae; Arabidopsis`HFA6B_ARATH^HFA6B_ARATH^Q:1183-965,H:48-120^79.452%ID^E:1.72e-89^RecName: …	-1.01505	0.254286	-1.80635	-1.05778	-1.05201	2.43054	2.62318	1.42951	2.0203	2.1099	1.52767	0.32916	0.892215	1.44489	-3.37682	-3.37682	-3.37682
1	Nsylvestris_NODE_11176_length_1965_cov_166	AER_ARATH^AER_ARATH^Q:216-1229,H:5-340^40.407%ID^E:5.75e-63^RecName: Full=NADPH-dependent oxidoreductase 2-alkenal reductase {ECO:0000303|PubMed:16299173};^Eukaryota; Viridiplantae; Streptophyta; Embryophyta; Tracheophyta; Spermatophyta; Magnoliopsida; eudicotyledons; Gunneridae; Pentapetalae; rosids; malvids; Brassicales; Brassicaceae; Camelineae; Arabidopsis	2.26419	3.27723	1.61978	2.32788	1.19716	2.73435	3.2235	3.28438	-1.30108	-1.38075	-0.654685	-1.53475	-2.03681	-2.01393	-4.03017	-2.9337	-4.04259
1	Nsylvestris_NODE_1118_length_4803_cov_215	BGA13_ARATH^BGA13_ARATH^Q:2684-288,H:44-843^59.278%ID^E:0^RecName: Full=Beta-galactosidase 13;^Eukaryota; Viridiplantae; Streptophyta; Embryophyta; Tracheophyta; Spermatophyta; Magnoliopsida; eudicotyledons; Gunneridae; Pentapetalae; rosids; malvids; Brassicales; Brassicaceae; Camelineae; Arabidopsis	0.221043	2.783	0.478582	-0.0624219	0.557288	0.801653	0.647975	0.732879	1.16421	-0.802681	0.261527	0.797235	-0.0866178	-0.111427	-2.37365	-2.01535	-2.99324
1	Nsylvestris_NODE_11180_length_1962_cov_55	.	1.07653	2.62145	1.76006	1.8135	1.48763	-1.96786	-2.3829	-2.3829	2.23632	0.840007	1.30154	1.64744	2.07675	1.77603	-3.96786	-3.96786	-3.96786
1	Nsylvestris_NODE_11183_length_1964_cov_195	TBD2A_HUMAN^TBD2A_HUMAN^Q:804-1628,H:618-893^39.711%ID^E:2.52e-53^RecName: Full=TBC1 domain family member 2A;^Eukaryota; Metazoa; Chordata; Craniata; Vertebrata; Euteleostomi; Mammalia; Eutheria; Euarchontoglires; Primates; Haplorrhini; Catarrhini; Hominidae; Homo	0.0653517	1.12774	0.0670445	0.442262	0.0507592	1.45266	1.05003	0.489195	1.13722	-0.379514	0.501051	0.291542	0.922515	-0.139722	-2.73476	-2.10554	-2.23782
1	Nsylvestris_NODE_11187_length_1964_cov_139	RZ21A_ORYSJ^RZ21A_ORYSJ^Q:271-588,H:1-106^76.415%ID^E:9.58e-48^RecName: Full=Serine/arginine-rich splicing factor RSZ21A;^Eukaryota; Viridiplantae; Streptophyta; Embryophyta; Tracheophyta; Spermatophyta; Magnoliopsida; Liliopsida; Poales; Poaceae; BOP clade; Oryzoideae; Oryzeae; Oryzinae; Oryza; Oryza sativa	1.64732	2.15076	1.37308	1.82073	-1.38266	1.94371	2.00713	0.124249	1.95779	0.427168	2.49226	0.672538	1.15677	1.68869	-6.02651	-6.02651	-6.02651
1	Nsylvestris_NODE_11188_length_1964_cov_113	BBX19_ARATH^BBX19_ARATH^Q:1463-1915,H:32-156^57.237%ID^E:5.19e-46^RecName: Full=B-box zinc finger protein 19 {ECO:0000303|PubMed:19920209};^Eukaryota; Viridiplantae; Streptophyta; Embryophyta; Tracheophyta; Spermatophyta; Magnoliopsida; eudicotyledons; Gunneridae; Pentapetalae; rosids; malvids; Brassicales; Brassicaceae; Camelineae; Arabidopsis`BBX19_ARATH^BBX19_ARATH^Q:359-454,H:1-32^81.25%ID^E:…	1.55995	2.79315	0.564479	1.3748	-0.584406	2.27451	2.51223	3.06661	0.914765	-1.03976	0.914387	0.248361	-0.588038	-0.0705155	-3.64922	-4.64922	-5.64209
1	Nsylvestris_NODE_11193_length_1963_cov_184	Y2837_ARATH^Y2837_ARATH^Q:1864-362,H:25-502^33.786%ID^E:1.35e-47^RecName: Full=WEB family protein At2g38370;^Eukaryota; Viridiplantae; Streptophyta; Embryophyta; Tracheophyta; Spermatophyta; Magnoliopsida; eudicotyledons; Gunneridae; Pentapetalae; rosids; malvids; Brassicales; Brassicaceae; Camelineae; Arabidopsis	0.671296	1.59292	1.8083	1.85442	2.09648	1.43567	1.56042	1.42633	0.375804	0.458201	-0.0614599	0.394887	-0.157603	-0.182817	-4.23165	-4.22222	-4.81898
1	Nsylvestris_NODE_11194_length_1963_cov_184	RNGB_DICDI^RNGB_DICDI^Q:527-312,H:870-942^38.356%ID^E:1.64e-08^RecName: Full=RING finger protein B;^Eukaryota; Amoebozoa; Mycetozoa; Dictyostelids; Dictyosteliales; Dictyosteliaceae; Dictyostelium	-0.507756	0.535834	-0.213405	0.119885	0.130574	0.762883	1.22745	0.553099	0.839019	-0.514734	0.617886	0.321221	0.641244	0.141395	-1.32084	-1.77265	-1.56111
1	Nsylvestris_NODE_11195_length_1963_cov_184	MP705_ARATH^MP705_ARATH^Q:137-1648,H:3-470^56.89%ID^E:3.02e-142^RecName: Full=Microtubule-associated protein 70-5;^Eukaryota; Viridiplantae; Streptophyta; Embryophyta; Tracheophyta; Spermatophyta; Magnoliopsida; eudicotyledons; Gunneridae; Pentapetalae; rosids; malvids; Brassicales; Brassicaceae; Camelineae; Arabidopsis	0.451482	-0.133481	0.865316	1.18845	1.74033	3.03644	2.89538	2.70782	0.281557	-1.71844	-2.71844	1.18845	1.08891	-2.71844	-2.71844	-2.71844	-2.71844
1	Nsylvestris_NODE_11197_length_1963_cov_118	PILS1_ARATH^PILS1_ARATH^Q:1394-132,H:86-472^58.432%ID^E:1.33e-159^RecName: Full=Protein PIN-LIKES 1 {ECO:0000303|PubMed:22504182};^Eukaryota; Viridiplantae; Streptophyta; Embryophyta; Tracheophyta; Spermatophyta; Magnoliopsida; eudicotyledons; Gunneridae; Pentapetalae; rosids; malvids; Brassicales; Brassicaceae; Camelineae; Arabidopsis	0.261825	1.12626	0.00814566	1.08994	-0.0319251	0.957264	0.99343	1.13129	0.488291	-0.419325	0.0545295	0.094768	0.380233	-0.651569	-2.02948	-1.44843	-2.00525
1	Nsylvestris_NODE_1120_length_4801_cov_124	APD1_ARATH^APD1_ARATH^Q:1225-422,H:184-441^44.485%ID^E:2.67e-61^RecName: Full=E3 ubiquitin-protein ligase APD1 {ECO:0000305};^Eukaryota; Viridiplantae; Streptophyta; Embryophyta; Tracheophyta; Spermatophyta; Magnoliopsida; eudicotyledons; Gunneridae; Pentapetalae; rosids; malvids; Brassicales; Brassicaceae; Camelineae; Arabidopsis`APD1_ARATH^APD1_ARATH^Q:2191-1934,H:76-161^44.186%ID^E:7.35e-14^Re…	0.798402	1.3087	0.653712	0.0515055	0.583227	1.97804	2.21453	1.71247	2.10432	0.782658	1.94182	0.89466	1.16728	0.774204	-5.32166	-5.29364	-6.35023
1	Nsylvestris_NODE_11201_length_1962_cov_220	UKL1_ARATH^UKL1_ARATH^Q:187-1638,H:1-485^86.804%ID^E:0^RecName: Full=Uridine kinase-like protein 1, chloroplastic;^Eukaryota; Viridiplantae; Streptophyta; Embryophyta; Tracheophyta; Spermatophyta; Magnoliopsida; eudicotyledons; Gunneridae; Pentapetalae; rosids; malvids; Brassicales; Brassicaceae; Camelineae; Arabidopsis	0.376987	0.9494	-0.129154	0.289573	-0.213162	0.780796	1.21817	1.30644	-0.427405	-0.903719	-0.752052	0.342313	0.492243	0.13948	-1.36141	-0.798693	-1.30981
1	Nsylvestris_NODE_11203_length_1962_cov_113	GGLO6_ARATH^GGLO6_ARATH^Q:122-1837,H:18-590^62.153%ID^E:0^RecName: Full=Probable L-gulonolactone oxidase 6 {ECO:0000303|PubMed:20622436};^Eukaryota; Viridiplantae; Streptophyta; Embryophyta; Tracheophyta; Spermatophyta; Magnoliopsida; eudicotyledons; Gunneridae; Pentapetalae; rosids; malvids; Brassicales; Brassicaceae; Camelineae; Arabidopsis	-0.738582	-0.989543	0.425494	1.12593	-0.574506	1.33238	1.46989	0.673422	2.35647	-0.252578	0.329497	0.884926	1.23285	0.125934	-2.57451	-3.57451	-1.25258
1	Nsylvestris_NODE_11204_length_1962_cov_67	.	0.0264307	1.61139	0.380068	-0.143494	-1.33614	1.10443	1.83195	-0.143494	1.8107	-0.0560314	0.752778	-0.143494	0.178434	-0.443055	-2.14349	-2.14349	-1.14349
1	Nsylvestris_NODE_11206_length_1962_cov_15	.	0.586159	0.448656	-0.551344	0.586159	-0.873273	1.12673	1.77058	-0.873273	0.934082	0.126727	0.71169	1.03362	0.71169	0.296652	-1.87327	-1.28831	-2.87327
1	Nsylvestris_NODE_1121_length_4799_cov_231	TOP2_ARATH^TOP2_ARATH^Q:119-3937,H:4-1325^64.254%ID^E:0^RecName: Full=DNA topoisomerase 2;^Eukaryota; Viridiplantae; Streptophyta; Embryophyta; Tracheophyta; Spermatophyta; Magnoliopsida; eudicotyledons; Gunneridae; Pentapetalae; rosids; malvids; Brassicales; Brassicaceae; Camelineae; Arabidopsis`TOP2_ARATH^TOP2_ARATH^Q:4232-4462,H:1383-1456^46.753%ID^E:2.04e-06^RecName: Full=DNA topoisomerase 2;…	0.514881	1.84051	0.542419	-0.127838	0.330732	2.62537	2.09883	2.15148	1.47473	0.0494339	1.36497	1.12677	0.813092	0.544236	-5.905	-4.72867	-4.71596
1	Nsylvestris_NODE_11211_length_1961_cov_220	PP351_ARATH^PP351_ARATH^Q:1782-484,H:4-436^65.438%ID^E:0^RecName: Full=Pentatricopeptide repeat-containing protein At4g35850, mitochondrial;^Eukaryota; Viridiplantae; Streptophyta; Embryophyta; Tracheophyta; Spermatophyta; Magnoliopsida; eudicotyledons; Gunneridae; Pentapetalae; rosids; malvids; Brassicales; Brassicaceae; Camelineae; Arabidopsis	1.10791	2.06815	0.861775	1.46784	0.370625	1.78132	1.94876	2.06639	1.22831	0.50078	1.09576	0.847666	0.699262	0.483188	-5.01389	-6.02275	-5.4911
1	Nsylvestris_NODE_11214_length_1961_cov_66	NFRKB_MOUSE^NFRKB_MOUSE^Q:568-101,H:503-659^50.633%ID^E:4.74e-42^RecName: Full=Nuclear factor related to kappa-B-binding protein;^Eukaryota; Metazoa; Chordata; Craniata; Vertebrata; Euteleostomi; Mammalia; Eutheria; Euarchontoglires; Glires; Rodentia; Myomorpha; Muroidea; Muridae; Murinae; Mus; Mus	1.02822	2.79636	1.69906	1.85776	0.665114	1.44272	1.94522	2.05416	-1.14224	-0.919849	0.86256	-0.267772	-0.919849	0.0801513	-3.7272	-3.7272	-3.7272
1	Nsylvestris_NODE_11215_length_1961_cov_38	MYBF_ARATH^MYBF_ARATH^Q:1243-1031,H:15-85^69.014%ID^E:4.3e-26^RecName: Full=Putative Myb family transcription factor At1g14600;^Eukaryota; Viridiplantae; Streptophyta; Embryophyta; Tracheophyta; Spermatophyta; Magnoliopsida; eudicotyledons; Gunneridae; Pentapetalae; rosids; malvids; Brassicales; Brassicaceae; Camelineae; Arabidopsis	0.114443	1.39451	0.218779	0.962439	-0.163091	1.0963	0.814882	0.316076	1.36237	-0.0375606	0.625404	0.218779	0.378078	0.46494	-2.48065	-2.40013	-2.88556
1	Nsylvestris_NODE_11219_length_1960_cov_212	DTX24_ARATH^DTX24_ARATH^Q:268-1647,H:30-490^56.182%ID^E:0^RecName: Full=Protein DETOXIFICATION 24 {ECO:0000303|PubMed:11739388};^Eukaryota; Viridiplantae; Streptophyta; Embryophyta; Tracheophyta; Spermatophyta; Magnoliopsida; eudicotyledons; Gunneridae; Pentapetalae; rosids; malvids; Brassicales; Brassicaceae; Camelineae; Arabidopsis	0.354191	0.893985	0.471058	0.681325	0.529031	1.72292	2.02219	2.34517	0.433246	-0.175382	0.488944	0.795227	0.937447	0.161158	-4.19772	-3.39762	-4.06517
1	Nsylvestris_NODE_11220_length_1960_cov_202	AVT3C_ARATH^AVT3C_ARATH^Q:312-1583,H:1-435^67.202%ID^E:0^RecName: Full=Amino acid transporter AVT3C {ECO:0000305};^Eukaryota; Viridiplantae; Streptophyta; Embryophyta; Tracheophyta; Spermatophyta; Magnoliopsida; eudicotyledons; Gunneridae; Pentapetalae; rosids; malvids; Brassicales; Brassicaceae; Camelineae; Arabidopsis	0.855554	1.20936	-0.288052	0.0781686	-0.116056	2.50761	2.33503	1.17504	1.80615	-0.76496	1.96982	0.816581	1.07855	1.06189	-5.16481	-5.16481	-3.39504
1	Nsylvestris_NODE_11221_length_1960_cov_188	PIGA_ARATH^PIGA_ARATH^Q:1681-359,H:1-441^81.179%ID^E:0^RecName: Full=Phosphatidylinositol N-acetylglucosaminyltransferase subunit A;^Eukaryota; Viridiplantae; Streptophyta; Embryophyta; Tracheophyta; Spermatophyta; Magnoliopsida; eudicotyledons; Gunneridae; Pentapetalae; rosids; malvids; Brassicales; Brassicaceae; Camelineae; Arabidopsis	0.0942856	1.20239	0.39039	0.745011	0.288715	1.21392	1.38915	1.37205	0.53223	-0.139418	0.738446	-0.0774019	0.483335	-0.0464207	-2.72147	-2.23069	-3.23451
1	Nsylvestris_NODE_11224_length_1960_cov_21	FBD37_ARATH^FBD37_ARATH^Q:119-997,H:1-263^28%ID^E:4.04e-14^RecName: Full=Putative FBD-associated F-box protein At5g56700;^Eukaryota; Viridiplantae; Streptophyta; Embryophyta; Tracheophyta; Spermatophyta; Magnoliopsida; eudicotyledons; Gunneridae; Pentapetalae; rosids; malvids; Brassicales; Brassicaceae; Camelineae; Arabidopsis	0.606513	1.5134	0.191476	-0.808524	-0.393487	0.606513	1.85444	1.5134	0.606513	-0.0715584	-0.0715584	1.5134	-0.0715584	0.191476	-2.39349	-2.39349	-2.39349
1	Nsylvestris_NODE_11225_length_1959_cov_223	APA1_ARATH^APA1_ARATH^Q:309-1769,H:22-506^74.438%ID^E:0^RecName: Full=Aspartic proteinase A1;^Eukaryota; Viridiplantae; Streptophyta; Embryophyta; Tracheophyta; Spermatophyta; Magnoliopsida; eudicotyledons; Gunneridae; Pentapetalae; rosids; malvids; Brassicales; Brassicaceae; Camelineae; Arabidopsis	0.573422	1.70789	0.602683	0.668616	-0.273715	1.30947	1.0643	1.64432	0.909688	-0.257066	0.721644	0.0203101	0.29079	-0.185102	-3.08758	-3.39044	-2.31924
1	Nsylvestris_NODE_11226_length_1959_cov_215	CSN4_ARATH^CSN4_ARATH^Q:153-1307,H:13-397^84.156%ID^E:0^RecName: Full=COP9 signalosome complex subunit 4;^Eukaryota; Viridiplantae; Streptophyta; Embryophyta; Tracheophyta; Spermatophyta; Magnoliopsida; eudicotyledons; Gunneridae; Pentapetalae; rosids; malvids; Brassicales; Brassicaceae; Camelineae; Arabidopsis	0.0629506	1.03018	-0.0486348	0.578574	-0.256186	1.22186	1.2739	1.07004	0.95654	-0.116343	0.27767	-0.102926	0.357781	-0.21003	-2.41799	-1.84153	-1.83585
1	Nsylvestris_NODE_11228_length_1959_cov_190	KN1_SOLLC^KN1_SOLLC^Q:508-1587,H:4-355^79.235%ID^E:0^RecName: Full=Homeotic protein knotted-1;^Eukaryota; Viridiplantae; Streptophyta; Embryophyta; Tracheophyta; Spermatophyta; Magnoliopsida; eudicotyledons; Gunneridae; Pentapetalae; asterids; lamiids; Solanales; Solanaceae; Solanoideae; Solaneae; Solanum; Lycopersicon	1.16795	1.7319	2.35216	1.66555	1.93572	1.19075	1.83928	1.53588	0.223136	-0.237345	0.493522	-1.69678	1.55115	-1.69678	-4.0187	-4.0187	-4.0187
1	Nsylvestris_NODE_11229_length_1959_cov_182	RBCMT_TOBAC^RBCMT_TOBAC^Q:1611-418,H:57-448^27.404%ID^E:2.65e-26^RecName: Full=Ribulose-1,5 bisphosphate carboxylase/oxygenase large subunit N-methyltransferase, chloroplastic;^Eukaryota; Viridiplantae; Streptophyta; Embryophyta; Tracheophyta; Spermatophyta; Magnoliopsida; eudicotyledons; Gunneridae; Pentapetalae; asterids; lamiids; Solanales; Solanaceae; Nicotianoideae; Nicotianeae; Nicotiana	0.372869	1.05499	0.401147	-0.115456	-0.0794243	1.09081	1.44338	0.945129	0.88285	-0.0323257	0.710345	0.102011	1.21723	0.479938	-2.40687	-3.18935	-2.87727
1	Nsylvestris_NODE_11234_length_1958_cov_213	LPAAT_ARATH^LPAAT_ARATH^Q:473-1576,H:46-415^80%ID^E:0^RecName: Full=1-acylglycerol-3-phosphate O-acyltransferase;^Eukaryota; Viridiplantae; Streptophyta; Embryophyta; Tracheophyta; Spermatophyta; Magnoliopsida; eudicotyledons; Gunneridae; Pentapetalae; rosids; malvids; Brassicales; Brassicaceae; Camelineae; Arabidopsis	0.221527	0.693761	0.104219	0.763743	-0.0322144	1.65119	2.13822	2.18027	1.42133	0.188222	1.34122	0.599597	0.914598	0.572144	-5.5517	-2.96307	-4.24305
1	Nsylvestris_NODE_11237_length_1958_cov_61	.	0.386454	1.14545	0.386454	-0.508693	1.00794	1.77348	1.89547	1.544	1.20958	-0.992057	1.544	-0.729023	0.686015	0.592905	-3.31399	-3.31399	-3.31399
1	Nsylvestris_NODE_1124_length_4787_cov_79	RENT3_ARATH^RENT3_ARATH^Q:3592-4080,H:303-482^36.082%ID^E:4.41e-08^RecName: Full=Regulator of nonsense transcripts UPF3 {ECO:0000305};^Eukaryota; Viridiplantae; Streptophyta; Embryophyta; Tracheophyta; Spermatophyta; Magnoliopsida; eudicotyledons; Gunneridae; Pentapetalae; rosids; malvids; Brassicales; Brassicaceae; Camelineae; Arabidopsis	0.357339	1.35883	0.278859	0.535331	-0.182368	1.69248	1.87667	1.79199	1.08641	0.520017	1.16795	0.577199	0.465131	0.378647	-4.15523	-3.51858	-4.23067
1	Nsylvestris_NODE_11244_length_1957_cov_150	MO1_ARATH^MO1_ARATH^Q:1131-70,H:23-382^47.934%ID^E:2.46e-111^RecName: Full=Monooxygenase 1 {ECO:0000303|PubMed:10216258};^Eukaryota; Viridiplantae; Streptophyta; Embryophyta; Tracheophyta; Spermatophyta; Magnoliopsida; eudicotyledons; Gunneridae; Pentapetalae; rosids; malvids; Brassicales; Brassicaceae; Camelineae; Arabidopsis	0.10195	1.068	0.294499	0.629771	-0.541861	0.577967	0.550133	0.338629	0.37194	-0.217233	0.264133	0.201375	0.116236	-0.0418258	-1.2715	-1.04857	-1.39364
1	Nsylvestris_NODE_11246_length_1957_cov_71	ARAD1_ARATH^ARAD1_ARATH^Q:1077-313,H:193-422^40.541%ID^E:1.01e-61^RecName: Full=Probable arabinosyltransferase ARAD1;^Eukaryota; Viridiplantae; Streptophyta; Embryophyta; Tracheophyta; Spermatophyta; Magnoliopsida; eudicotyledons; Gunneridae; Pentapetalae; rosids; malvids; Brassicales; Brassicaceae; Camelineae; Arabidopsis`ARAD1_ARATH^ARAD1_ARATH^Q:1568-1116,H:60-190^32.468%ID^E:1.01e-61^RecName:…	-0.138472	0.605603	-0.269587	0.48356	0.0230729	1.31504	1.42284	0.831931	1.10035	0.527811	0.749306	0.659924	0.861679	-0.782461	-1.54578	-2.15335	-3.69148
1	Nsylvestris_NODE_11247_length_1957_cov_57	SNAK2_SOLTU^SNAK2_SOLTU^Q:1038-1169,H:1-44^84.091%ID^E:6.5e-07^RecName: Full=Snakin-2;^Eukaryota; Viridiplantae; Streptophyta; Embryophyta; Tracheophyta; Spermatophyta; Magnoliopsida; eudicotyledons; Gunneridae; Pentapetalae; asterids; lamiids; Solanales; Solanaceae; Solanoideae; Solaneae; Solanum	-0.0179901	-0.919455	-0.191481	0.886699	-2.28403	2.00138	2.38812	1.35983	1.71913	0.524358	-0.239633	0.836159	1.08753	0.715973	-3.28403	-3.28403	-1.29853
1	Nsylvestris_NODE_11251_length_1957_cov_15	.	0.593783	0.178746	0.401138	-0.821254	-0.821254	2.29422	2.17574	0.178746	1.50067	1.28755	-0.406217	0.278602	0.784398	-1.40622	-2.40622	-1.40622	-2.40622
1	Nsylvestris_NODE_11256_length_1956_cov_203	CSK21_ARATH^CSK21_ARATH^Q:1603-599,H:75-409^94.03%ID^E:0^RecName: Full=Casein kinase II subunit alpha-1;^Eukaryota; Viridiplantae; Streptophyta; Embryophyta; Tracheophyta; Spermatophyta; Magnoliopsida; eudicotyledons; Gunneridae; Pentapetalae; rosids; malvids; Brassicales; Brassicaceae; Camelineae; Arabidopsis	0.158995	0.924692	-0.20352	0.404314	-0.544115	1.16573	1.10655	1.17707	0.829507	0.0647003	0.606392	0.460076	0.440734	0.190334	-2.52295	-2.33613	-1.92238
1	Nsylvestris_NODE_11259_length_1956_cov_51	LYK4_ARATH^LYK4_ARATH^Q:2-1750,H:51-610^44.048%ID^E:1.77e-142^RecName: Full=LysM domain receptor-like kinase 4;^Eukaryota; Viridiplantae; Streptophyta; Embryophyta; Tracheophyta; Spermatophyta; Magnoliopsida; eudicotyledons; Gunneridae; Pentapetalae; rosids; malvids; Brassicales; Brassicaceae; Camelineae; Arabidopsis	-0.152004	-0.997884	0.673714	0.953018	0.943491	3.28734	1.07664	2.19468	1.3123	-0.193446	-4.40524	2.42347	0.602855	1.44651	-2.58149	-2.17873	-4.40524
1	Nsylvestris_NODE_1126_length_4786_cov_83	.	0.522736	2.12853	0.357577	0.0392746	0.184984	1.69446	1.3401	0.67505	1.96726	0.655298	1.70707	1.25277	1.07627	1.03927	-5.93686	-4.3519	-4.3519
1	Nsylvestris_NODE_11271_length_1955_cov_41	.	0.459351	1.27633	0.452578	-0.46496	1.68704	2.05246	0.80141	-0.44427	1.88868	0.0908562	0.722667	1.17195	1.97953	-0.768966	-3.63488	-3.63488	-3.63488
1	Nsylvestris_NODE_11274_length_1954_cov_211	P2C05_ARATH^P2C05_ARATH^Q:1683-406,H:1-427^74.126%ID^E:0^RecName: Full=Probable protein phosphatase 2C 5;^Eukaryota; Viridiplantae; Streptophyta; Embryophyta; Tracheophyta; Spermatophyta; Magnoliopsida; eudicotyledons; Gunneridae; Pentapetalae; rosids; malvids; Brassicales; Brassicaceae; Camelineae; Arabidopsis	0.492323	1.40855	0.912487	1.54638	-0.0682779	1.75136	1.76234	1.98039	1.34833	0.16732	0.60358	0.950314	1.32846	0.590596	-5.93919	-4.43362	-4.40134
1	Nsylvestris_NODE_11278_length_1954_cov_80	.	0.306036	1.04088	-0.0158925	-0.0565345	-0.228367	0.543191	0.622568	-0.0158925	1.00401	0.542103	0.942641	0.171734	-0.0158925	-0.347874	-1.01589	-1.09835	-2.37846
1	Nsylvestris_NODE_11281_length_1954_cov_39	PP160_ARATH^PP160_ARATH^Q:251-1906,H:40-591^60.326%ID^E:0^RecName: Full=Pentatricopeptide repeat-containing protein At2g17525, mitochondrial;^Eukaryota; Viridiplantae; Streptophyta; Embryophyta; Tracheophyta; Spermatophyta; Magnoliopsida; eudicotyledons; Gunneridae; Pentapetalae; rosids; malvids; Brassicales; Brassicaceae; Camelineae; Arabidopsis	0.00638974	1.02793	-0.837953	-0.551257	-0.706837	0.529619	0.790626	0.758565	1.25	1.04039	1.15824	0.192844	0.251152	-0.763438	-0.909814	-0.825264	-2.4112
1	Nsylvestris_NODE_11284_length_1953_cov_227	SYS_HELAN^SYS_HELAN^Q:171-1466,H:1-432^84.259%ID^E:0^RecName: Full=Serine--tRNA ligase;^Eukaryota; Viridiplantae; Streptophyta; Embryophyta; Tracheophyta; Spermatophyta; Magnoliopsida; eudicotyledons; Gunneridae; Pentapetalae; asterids; campanulids; Asterales; Asteraceae; Asteroideae; Heliantheae alliance; Heliantheae; Helianthus	-0.392507	0.287179	-0.333511	0.316589	-0.231285	1.13694	1.13786	1.2113	0.461875	0.0192315	0.0380368	0.178543	0.0251035	-0.286338	-0.980852	-1.18339	-1.40478
1	Nsylvestris_NODE_11287_length_1953_cov_168	POLR1_ARATH^POLR1_ARATH^Q:908-177,H:1221-1464^36.066%ID^E:6.69e-33^RecName: Full=Retrovirus-related Pol polyprotein from transposon RE1;^Eukaryota; Viridiplantae; Streptophyta; Embryophyta; Tracheophyta; Spermatophyta; Magnoliopsida; eudicotyledons; Gunneridae; Pentapetalae; rosids; malvids; Brassicales; Brassicaceae; Camelineae; Arabidopsis	-0.695966	0.111389	-0.0636976	0.0409998	-0.515394	1.29196	1.21732	0.997056	0.763466	-0.0950618	0.72806	0.625962	0.217323	-0.245304	-1.07929	-1.60286	-1.69597
1	Nsylvestris_NODE_1129_length_4781_cov_230	SEC_ARATH^SEC_ARATH^Q:3309-520,H:48-977^81.183%ID^E:0^RecName: Full=Probable UDP-N-acetylglucosamine--peptide N-acetylglucosaminyltransferase SEC;^Eukaryota; Viridiplantae; Streptophyta; Embryophyta; Tracheophyta; Spermatophyta; Magnoliopsida; eudicotyledons; Gunneridae; Pentapetalae; rosids; malvids; Brassicales; Brassicaceae; Camelineae; Arabidopsis	0.56274	1.25133	0.644233	1.03051	0.268095	1.46611	1.6243	1.75595	1.12428	0.0286797	0.864908	-0.928573	-0.557019	-1.52356	-2.44817	-2.60437	-2.55944
1	Nsylvestris_NODE_11292_length_1953_cov_23	POLX_TOBAC^POLX_TOBAC^Q:60-215,H:1274-1325^46.154%ID^E:2.26e-06^RecName: Full=Retrovirus-related Pol polyprotein from transposon TNT 1-94;^Eukaryota; Viridiplantae; Streptophyta; Embryophyta; Tracheophyta; Spermatophyta; Magnoliopsida; eudicotyledons; Gunneridae; Pentapetalae; asterids; lamiids; Solanales; Solanaceae; Nicotianoideae; Nicotianeae; Nicotiana	0.536194	1.15051	0.758586	-0.0487686	-2.04877	1.86244	0.551739	1.03954	0.423719	-3.04877	0.280355	1.27316	1.39947	1.03869	-3.04877	-1.07057	-1.04877
1	Nsylvestris_NODE_11293_length_1952_cov_218	SBT61_ARATH^SBT61_ARATH^Q:1950-172,H:361-958^76.589%ID^E:0^RecName: Full=Subtilisin-like protease SBT6.1 {ECO:0000303|PubMed:16193095};^Eukaryota; Viridiplantae; Streptophyta; Embryophyta; Tracheophyta; Spermatophyta; Magnoliopsida; eudicotyledons; Gunneridae; Pentapetalae; rosids; malvids; Brassicales; Brassicaceae; Camelineae; Arabidopsis	0.972313	1.85789	0.625673	0.152214	-0.334877	1.90958	1.9878	1.65067	2.2232	0.237371	1.51216	1.25771	1.61501	1.12363	-5.59678	-5.59678	-5.59678
1	Nsylvestris_NODE_11296_length_1951_cov_226	THRC_SOLTU^THRC_SOLTU^Q:1883-360,H:17-519^91.159%ID^E:0^RecName: Full=Threonine synthase, chloroplastic;^Eukaryota; Viridiplantae; Streptophyta; Embryophyta; Tracheophyta; Spermatophyta; Magnoliopsida; eudicotyledons; Gunneridae; Pentapetalae; asterids; lamiids; Solanales; Solanaceae; Solanoideae; Solaneae; Solanum	0.121011	1.13109	-0.0241783	0.544339	-0.515773	1.30346	0.994128	1.0983	0.569534	-0.348862	0.284888	-0.240829	0.327994	-0.605757	-1.30121	-1.69666	-1.64148
1	Nsylvestris_NODE_11298_length_1951_cov_220	PME21_ARATH^PME21_ARATH^Q:1769-153,H:28-566^48.182%ID^E:1.22e-176^RecName: Full=Probable pectinesterase/pectinesterase inhibitor 21;^Eukaryota; Viridiplantae; Streptophyta; Embryophyta; Tracheophyta; Spermatophyta; Magnoliopsida; eudicotyledons; Gunneridae; Pentapetalae; rosids; malvids; Brassicales; Brassicaceae; Camelineae; Arabidopsis	1.17422	4.56124	1.92187	0.0322658	2.83581	0.524181	-4.33231	-2.67238	2.70189	-2.75216	-0.696552	1.69494	0.574103	-0.73061	0.453767	-4.33231	-0.957963
1	Nsylvestris_NODE_1130_length_4778_cov_141	HIPL1_ARATH^HIPL1_ARATH^Q:160-2043,H:21-656^61.599%ID^E:0^RecName: Full=HIPL1 protein;^Eukaryota; Viridiplantae; Streptophyta; Embryophyta; Tracheophyta; Spermatophyta; Magnoliopsida; eudicotyledons; Gunneridae; Pentapetalae; rosids; malvids; Brassicales; Brassicaceae; Camelineae; Arabidopsis	0.381377	1.63614	0.21399	0.109336	0.377567	1.25651	1.58641	1.41548	1.2792	-0.0330451	0.522206	1.05756	0.656084	0.874299	-4.07404	-3.47563	-3.78345
1	Nsylvestris_NODE_11302_length_1951_cov_128	PTA14_ARATH^PTA14_ARATH^Q:304-1593,H:56-483^71.395%ID^E:0^RecName: Full=Protein PLASTID TRANSCRIPTIONALLY ACTIVE 14 {ECO:0000303|PubMed:16326926};^Eukaryota; Viridiplantae; Streptophyta; Embryophyta; Tracheophyta; Spermatophyta; Magnoliopsida; eudicotyledons; Gunneridae; Pentapetalae; rosids; malvids; Brassicales; Brassicaceae; Camelineae; Arabidopsis	0.266867	1.66288	-0.0642757	0.0615088	0.00389292	0.670215	0.841816	0.781183	0.618307	0.178326	0.804493	0.428199	0.531488	0.643912	-1.88443	-2.87773	-2.66665
1	Nsylvestris_NODE_11309_length_1950_cov_48	LAC17_ARATH^LAC17_ARATH^Q:1868-246,H:7-560^77.437%ID^E:0^RecName: Full=Laccase-17;^Eukaryota; Viridiplantae; Streptophyta; Embryophyta; Tracheophyta; Spermatophyta; Magnoliopsida; eudicotyledons; Gunneridae; Pentapetalae; rosids; malvids; Brassicales; Brassicaceae; Camelineae; Arabidopsis	1.80022	1.96532	1.36157	1.00443	0.254293	2.25565	1.60687	1.87495	0.883505	-0.27181	0.486223	-1.21796	-0.106783	-0.646228	-1.54513	-4.85256	-4.85256
1	Nsylvestris_NODE_11310_length_1950_cov_42	.	1.71239	2.10192	1.7928	1.39187	2.15723	-1.45513	0.0908426	-0.133198	1.37168	-1.4055	0.54307	-1.15061	-0.136086	0.484101	-2.45513	-2.45513	-2.45513
1	Nsylvestris_NODE_11311_length_1949_cov_235	DTX40_ARATH^DTX40_ARATH^Q:105-1643,H:1-506^74.319%ID^E:0^RecName: Full=Protein DETOXIFICATION 40 {ECO:0000303|PubMed:11739388};^Eukaryota; Viridiplantae; Streptophyta; Embryophyta; Tracheophyta; Spermatophyta; Magnoliopsida; eudicotyledons; Gunneridae; Pentapetalae; rosids; malvids; Brassicales; Brassicaceae; Camelineae; Arabidopsis	0.142105	0.238213	-0.497968	0.632758	-0.0597758	0.47854	1.46709	1.41775	0.913928	-0.324177	0.298542	0.268969	0.205535	-1.00423	-1.31655	-0.684127	-2.1766
1	Nsylvestris_NODE_11314_length_1949_cov_192	.	-0.158379	0.98468	0.125572	0.594101	-0.098191	1.94341	2.62283	2.21005	-0.0939547	-0.724376	0.0987461	0.374677	0.928468	0.0648451	-3.75011	-1.36664	-3.75573
1	Nsylvestris_NODE_11316_length_1949_cov_185	FLK_ARATH^FLK_ARATH^Q:375-1691,H:123-559^56.278%ID^E:3.5e-143^RecName: Full=Flowering locus K homology domain {ECO:0000303|PubMed:14593172};^Eukaryota; Viridiplantae; Streptophyta; Embryophyta; Tracheophyta; Spermatophyta; Magnoliopsida; eudicotyledons; Gunneridae; Pentapetalae; rosids; malvids; Brassicales; Brassicaceae; Camelineae; Arabidopsis	0.6311	1.72295	0.359589	0.978879	0.0756583	1.40334	1.91646	1.68469	0.782598	-0.14342	0.672949	-0.469591	0.730515	0.312959	-5.52574	-3.04548	-2.08745
1	Nsylvestris_NODE_11317_length_1949_cov_171	TPT_FLATR^TPT_FLATR^Q:445-1530,H:63-403^76.243%ID^E:9.9e-174^RecName: Full=Triose phosphate/phosphate translocator, chloroplastic;^Eukaryota; Viridiplantae; Streptophyta; Embryophyta; Tracheophyta; Spermatophyta; Magnoliopsida; eudicotyledons; Gunneridae; Pentapetalae; asterids; campanulids; Asterales; Asteraceae; Asteroideae; Heliantheae alliance; Tageteae; Flaveria	-0.860911	0.223978	-0.0226622	0.26462	-0.619903	1.35208	1.29437	1.75291	0.487012	0.66455	0.66455	0.304148	-0.0473242	-0.0979503	-1.38174	-1.65738	-2.32034
1	Nsylvestris_NODE_11319_length_1949_cov_106	.	-0.763313	1.37419	0.37419	0.821649	-0.763313	3.06451	2.12421	2.66965	1.23741	-0.766202	0.156599	0.499721	-0.0131357	-0.760431	-3.08524	-3.08524	-3.08524
1	Nsylvestris_NODE_1132_length_4772_cov_36	TMVRN_NICGU^TMVRN_NICGU^Q:3322-1811,H:287-730^33.202%ID^E:6.9e-64^RecName: Full=TMV resistance protein N;^Eukaryota; Viridiplantae; Streptophyta; Embryophyta; Tracheophyta; Spermatophyta; Magnoliopsida; eudicotyledons; Gunneridae; Pentapetalae; asterids; lamiids; Solanales; Solanaceae; Nicotianoideae; Nicotianeae; Nicotiana	-0.784256	1.61731	0.372366	-0.286465	-0.687996	1.27279	1.1942	1.51307	0.175943	0.545223	0.544665	-1.2007	0.397923	0.393592	-1.79976	-0.738716	-2.52919
1	Nsylvestris_NODE_11322_length_1949_cov_65	RN217_XENLA^RN217_XENLA^Q:619-1143,H:18-193^30.055%ID^E:2.13e-17^RecName: Full=Probable E3 ubiquitin-protein ligase RNF217;^Eukaryota; Metazoa; Chordata; Craniata; Vertebrata; Euteleostomi; Amphibia; Batrachia; Anura; Pipoidea; Pipidae; Xenopodinae; Xenopus; Xenopus	0.39068	1.50414	0.67541	0.675625	0.337241	1.51777	2.29589	1.82062	1.69689	0.949171	1.19428	0.808993	1.46718	0.838139	-5.39068	-5.39068	-5.39068
1	Nsylvestris_NODE_11329_length_1948_cov_201	R13L1_ARATH^R13L1_ARATH^Q:1940-6,H:129-777^39.549%ID^E:3.96e-133^RecName: Full=Putative disease resistance RPP13-like protein 1;^Eukaryota; Viridiplantae; Streptophyta; Embryophyta; Tracheophyta; Spermatophyta; Magnoliopsida; eudicotyledons; Gunneridae; Pentapetalae; rosids; malvids; Brassicales; Brassicaceae; Camelineae; Arabidopsis	0.0261895	1.72276	-0.223086	-0.461419	-0.891238	1.77183	1.39401	0.972556	1.44901	0.17395	0.526371	-0.133459	0.920322	-0.0519507	-2.30269	-1.949	-2.94414
1	Nsylvestris_NODE_11331_length_1948_cov_151	.	1.67213	2.21757	1.87207	2.48505	1.34532	2.64259	3.34532	2.46268	2.72947	1.5712	2.29557	-1.95236	-4.53732	-4.53732	-4.53732	-4.53732	-4.53732
1	Nsylvestris_NODE_11332_length_1948_cov_141	E1314_ARATH^E1314_ARATH^Q:129-1115,H:28-357^66.061%ID^E:2.04e-163^RecName: Full=Glucan endo-1,3-beta-glucosidase 14;^Eukaryota; Viridiplantae; Streptophyta; Embryophyta; Tracheophyta; Spermatophyta; Magnoliopsida; eudicotyledons; Gunneridae; Pentapetalae; rosids; malvids; Brassicales; Brassicaceae; Camelineae; Arabidopsis	0.250541	0.293702	0.663543	1.00832	0.229102	1.88372	1.65506	1.8634	1.52914	0.834669	-0.335048	0.611859	0.816603	-0.477585	-5.27615	-2.09029	-3.46058
1	Nsylvestris_NODE_11335_length_1948_cov_71	.	-0.418972	1.03342	-0.731805	0.132324	-0.375099	1.22007	1.43486	1.14163	0.963086	0.641724	0.837293	-0.39502	0.903385	0.339092	-2.28577	-1.41683	-3.02339
1	Nsylvestris_NODE_11336_length_1948_cov_36	ATL6_ARATH^ATL6_ARATH^Q:219-1247,H:1-315^44.382%ID^E:8.59e-62^RecName: Full=E3 ubiquitin-protein ligase ATL6;^Eukaryota; Viridiplantae; Streptophyta; Embryophyta; Tracheophyta; Spermatophyta; Magnoliopsida; eudicotyledons; Gunneridae; Pentapetalae; rosids; malvids; Brassicales; Brassicaceae; Camelineae; Arabidopsis	0.787928	1.18513	-0.137604	0.529641	-1.16118	1.87644	1.08675	2.2369	0.528117	-0.227438	0.0553435	0.5097	-0.140025	0.557802	-1.4547	-4.29869	-1.93411
1	Nsylvestris_NODE_11339_length_1947_cov_223	KN13B_ARATH^KN13B_ARATH^Q:1945-626,H:244-681^78.182%ID^E:0^RecName: Full=Kinesin-like protein KIN-13B {ECO:0000305};^Eukaryota; Viridiplantae; Streptophyta; Embryophyta; Tracheophyta; Spermatophyta; Magnoliopsida; eudicotyledons; Gunneridae; Pentapetalae; rosids; malvids; Brassicales; Brassicaceae; Camelineae; Arabidopsis	-0.754233	0.164088	0.448479	0.756051	0.558548	0.800989	0.55679	0.324246	0.656557	-0.0830229	-0.0431166	0.261759	0.341983	-0.132479	-1.91735	-0.896342	-1.04295
1	Nsylvestris_NODE_11343_length_1947_cov_145	RH17_ARATH^RH17_ARATH^Q:157-1839,H:25-585^66.963%ID^E:0^RecName: Full=DEAD-box ATP-dependent RNA helicase 17;^Eukaryota; Viridiplantae; Streptophyta; Embryophyta; Tracheophyta; Spermatophyta; Magnoliopsida; eudicotyledons; Gunneridae; Pentapetalae; rosids; malvids; Brassicales; Brassicaceae; Camelineae; Arabidopsis	0.134687	0.684673	-0.0230035	0.387277	-0.813379	2.43791	2.36968	2.23877	1.52938	0.792943	0.637592	0.943791	1.42514	0.662257	-3.69768	-4.25107	-5.45897
1	Nsylvestris_NODE_11344_length_1947_cov_142	.	0.0300031	0.387876	-0.2424	-0.0154665	-1.00965	0.673395	1.75979	1.06709	1.12629	0.113577	1.49206	0.37436	0.418022	0.46704	-2.72841	-1.4113	-2.50228
1	Nsylvestris_NODE_11345_length_1947_cov_128	OLA1_ORYSJ^OLA1_ORYSJ^Q:1104-391,H:157-394^84.454%ID^E:1.33e-143^RecName: Full=Obg-like ATPase 1 {ECO:0000255|HAMAP-Rule:MF_03167};^Eukaryota; Viridiplantae; Streptophyta; Embryophyta; Tracheophyta; Spermatophyta; Magnoliopsida; Liliopsida; Poales; Poaceae; BOP clade; Oryzoideae; Oryzeae; Oryzinae; Oryza; Oryza sativa	0.497602	1.33698	0.274148	0.952286	0.117098	1.12316	1.69557	1.79483	0.745975	0.401473	0.615022	0.517938	-0.0699341	-0.108462	-3.16143	-3.10512	-3.62712
1	Nsylvestris_NODE_11349_length_1947_cov_15	.	-0.0859598	1.82093	-0.0859598	-0.500997	-0.500997	2.16197	1.23597	2.30636	0.235968	-2.08596	-2.08596	1.37347	0.235968	1.23308	-2.08596	-1.08596	-2.08596
1	Nsylvestris_NODE_11355_length_1946_cov_109	PP334_ARATH^PP334_ARATH^Q:1793-357,H:12-491^52.292%ID^E:1.34e-178^RecName: Full=Pentatricopeptide repeat-containing protein At4g21705, mitochondrial;^Eukaryota; Viridiplantae; Streptophyta; Embryophyta; Tracheophyta; Spermatophyta; Magnoliopsida; eudicotyledons; Gunneridae; Pentapetalae; rosids; malvids; Brassicales; Brassicaceae; Camelineae; Arabidopsis	0.704771	1.55694	0.304789	0.538828	0.821993	1.97392	2.06851	1.74406	1.65013	0.593332	1.48572	1.47394	1.21104	0.369671	-5.49921	-5.49921	-5.49921
1	Nsylvestris_NODE_11356_length_1946_cov_91	.	-0.167233	1.69887	-0.304736	0.45995	0.621263	-0.304736	-0.297541	-0.304736	1.071	0.373336	-0.311968	2.66483	1.7895	0.837351	-3.62666	-0.571816	-3.62666
1	Nsylvestris_NODE_11357_length_1946_cov_88	FEX2_SCHPO^FEX2_SCHPO^Q:755-1588,H:40-308^24.232%ID^E:5.83e-08^RecName: Full=Fluoride export protein 2 {ECO:0000250|UniProtKB:Q08913};^Eukaryota; Fungi; Dikarya; Ascomycota; Taphrinomycotina; Schizosaccharomycetes; Schizosaccharomycetales; Schizosaccharomycetaceae; Schizosaccharomyces	-0.342611	0.351281	0.774715	1.59994	0.66043	0.675841	1.20982	1.05666	-0.11861	-1.04667	-0.100994	-0.90777	-1.13513	-2.41599	0.124742	0.612243	-0.997909
1	Nsylvestris_NODE_11366_length_1945_cov_88	UBC37_ARATH^UBC37_ARATH^Q:1867-1502,H:47-168^82.787%ID^E:6.41e-66^RecName: Full=Probable ubiquitin-conjugating enzyme E2 37;^Eukaryota; Viridiplantae; Streptophyta; Embryophyta; Tracheophyta; Spermatophyta; Magnoliopsida; eudicotyledons; Gunneridae; Pentapetalae; rosids; malvids; Brassicales; Brassicaceae; Camelineae; Arabidopsis	0.359461	1.23555	0.320222	0.652213	0.910276	2.07051	1.95752	1.02923	0.727975	-0.721688	0.282244	-0.743908	-0.363675	-1.93884	-2.7154	-1.06304	-1.99865
1	Nsylvestris_NODE_11369_length_1945_cov_36	.	-0.25566	1.06627	-0.25566	0.481305	-0.25566	2.15938	1.68294	0.618809	0.481305	-0.518695	1.80323	-0.0332678	1.06627	0.481305	-2.84062	-2.84062	-2.84062
1	Nsylvestris_NODE_11371_length_1945_cov_24	ARP4_ORYSJ^ARP4_ORYSJ^Q:1945-1841,H:147-181^91.429%ID^E:1.58e-10^RecName: Full=Actin-related protein 4;^Eukaryota; Viridiplantae; Streptophyta; Embryophyta; Tracheophyta; Spermatophyta; Magnoliopsida; Liliopsida; Poales; Poaceae; BOP clade; Oryzoideae; Oryzeae; Oryzinae; Oryza; Oryza sativa	0.0349726	1.30277	0.537233	-1.7847	-1.19973	1.30362	1.1222	1.1222	1.1222	1.30277	1.2153	0.674736	1.80027	-0.199733	-2.7847	-2.7847	-2.7847
1	Nsylvestris_NODE_11377_length_1944_cov_198	C3H69_ARATH^C3H69_ARATH^Q:1860-805,H:1-350^65.169%ID^E:2.26e-156^RecName: Full=Putative RING-type E3 ubiquitin transferase C3H69 {ECO:0000305};^Eukaryota; Viridiplantae; Streptophyta; Embryophyta; Tracheophyta; Spermatophyta; Magnoliopsida; eudicotyledons; Gunneridae; Pentapetalae; rosids; malvids; Brassicales; Brassicaceae; Camelineae; Arabidopsis	0.0679835	1.08563	0.374665	0.96316	-0.673556	1.50181	1.47295	1.53708	0.621016	-0.940726	0.627707	0.202906	0.212015	-0.373471	-1.94929	-1.76409	-2.96579
1	Nsylvestris_NODE_11379_length_1944_cov_166	FHYRK_ARATH^FHYRK_ARATH^Q:323-1453,H:1-377^74.536%ID^E:0^RecName: Full=Bifunctional riboflavin kinase/FMN phosphatase;^Eukaryota; Viridiplantae; Streptophyta; Embryophyta; Tracheophyta; Spermatophyta; Magnoliopsida; eudicotyledons; Gunneridae; Pentapetalae; rosids; malvids; Brassicales; Brassicaceae; Camelineae; Arabidopsis	0.177916	1.22089	-0.22714	0.238359	-0.158795	0.0484636	0.423956	0.488578	0.993677	0.586604	0.802632	-0.181606	0.680693	0.140137	-1.28709	-1.50691	-2.44037
1	Nsylvestris_NODE_11384_length_1944_cov_37	PP337_ARATH^PP337_ARATH^Q:228-1715,H:32-527^56.452%ID^E:0^RecName: Full=Pentatricopeptide repeat-containing protein At4g25270, chloroplastic;^Eukaryota; Viridiplantae; Streptophyta; Embryophyta; Tracheophyta; Spermatophyta; Magnoliopsida; eudicotyledons; Gunneridae; Pentapetalae; rosids; malvids; Brassicales; Brassicaceae; Camelineae; Arabidopsis	0.530795	1.63354	0.814395	0.849838	0.229432	1.17285	0.988424	1.25691	0.0380547	0.140755	0.585576	0.54424	0.485514	0.386973	-2.77947	-3.44244	-3.43538
1	Nsylvestris_NODE_11390_length_1943_cov_158	RECA3_ARATH^RECA3_ARATH^Q:273-1424,H:1-382^76.042%ID^E:0^RecName: Full=DNA repair protein recA homolog 3, mitochondrial;^Eukaryota; Viridiplantae; Streptophyta; Embryophyta; Tracheophyta; Spermatophyta; Magnoliopsida; eudicotyledons; Gunneridae; Pentapetalae; rosids; malvids; Brassicales; Brassicaceae; Camelineae; Arabidopsis	0.311092	1.02609	0.166941	0.398911	0.341951	0.824453	1.06378	1.43743	0.573925	-0.0442283	0.680912	0.431035	0.470616	-0.771156	-1.71704	-3.9585	-1.23621
1	Nsylvestris_NODE_11393_length_1943_cov_34	XTH26_ARATH^XTH26_ARATH^Q:123-974,H:4-291^59.375%ID^E:8.11e-122^RecName: Full=Probable xyloglucan endotransglucosylase/hydrolase protein 26;^Eukaryota; Viridiplantae; Streptophyta; Embryophyta; Tracheophyta; Spermatophyta; Magnoliopsida; eudicotyledons; Gunneridae; Pentapetalae; rosids; malvids; Brassicales; Brassicaceae; Camelineae; Arabidopsis	-0.216227	0.520739	0.00616586	1.14179	0.520739	1.65824	1.52074	1.1057	0.419141	0.368736	0.198811	-0.801189	1.44674	-0.493761	-2.80119	-1.79399	-2.80119
1	Nsylvestris_NODE_11403_length_1941_cov_205	CYQ32_CATRO^CYQ32_CATRO^Q:93-1607,H:4-497^50.784%ID^E:2.03e-177^RecName: Full=Cytochrome P450 81Q32 {ECO:0000303|PubMed:24710322};^Eukaryota; Viridiplantae; Streptophyta; Embryophyta; Tracheophyta; Spermatophyta; Magnoliopsida; eudicotyledons; Gunneridae; Pentapetalae; asterids; lamiids; Gentianales; Apocynaceae; Rauvolfioideae; Vinceae; Catharanthinae; Catharanthus	0.774108	1.61402	0.733095	1.36068	0.641034	1.5265	1.73729	1.14829	1.55884	0.718907	1.13897	0.811387	1.04993	0.927127	-5.71325	-4.70622	-5.32071
1	Nsylvestris_NODE_11404_length_1941_cov_196	.	0.21892	1.08659	0.615501	0.700798	0.428659	1.329	1.52963	1.64081	0.531465	0.239046	0.402565	-2.51111	-2.73104	-2.76076	0.0529872	-0.342314	-0.430744
1	Nsylvestris_NODE_11405_length_1941_cov_116	AB12I_ARATH^AB12I_ARATH^Q:1351-899,H:240-390^68.212%ID^E:2.83e-63^RecName: Full=Protein ABCI12, chloroplastic;^Eukaryota; Viridiplantae; Streptophyta; Embryophyta; Tracheophyta; Spermatophyta; Magnoliopsida; eudicotyledons; Gunneridae; Pentapetalae; rosids; malvids; Brassicales; Brassicaceae; Camelineae; Arabidopsis	0.95188	1.46335	0.366038	-0.211033	0.686383	1.86869	2.071	1.68709	1.57099	0.746375	0.970792	0.373929	1.32954	0.136375	-4.67046	-4.67046	-4.67046
1	Nsylvestris_NODE_1141_length_4765_cov_225	KEA2_ARATH^KEA2_ARATH^Q:4059-430,H:1-1174^68.52%ID^E:0^RecName: Full=K(+) efflux antiporter 2, chloroplastic {ECO:0000303|PubMed:11500563};^Eukaryota; Viridiplantae; Streptophyta; Embryophyta; Tracheophyta; Spermatophyta; Magnoliopsida; eudicotyledons; Gunneridae; Pentapetalae; rosids; malvids; Brassicales; Brassicaceae; Camelineae; Arabidopsis	0.238559	1.19404	-0.467976	-0.676106	-0.530447	1.85174	1.91796	1.8623	1.38309	0.380922	1.28391	0.606942	0.553646	0.305535	-3.25012	-2.99855	-3.65545
1	Nsylvestris_NODE_11410_length_1940_cov_212	PWP1_BOVIN^PWP1_BOVIN^Q:341-1564,H:78-471^39.512%ID^E:1.14e-79^RecName: Full=Periodic tryptophan protein 1 homolog;^Eukaryota; Metazoa; Chordata; Craniata; Vertebrata; Euteleostomi; Mammalia; Eutheria; Laurasiatheria; Cetartiodactyla; Ruminantia; Pecora; Bovidae; Bovinae; Bos	0.1983	1.09182	-0.283045	0.443604	0.28147	1.4926	1.40093	1.21881	0.0331337	-0.432612	0.0140298	-0.646887	-0.043938	-1.01919	-0.90783	-1.15974	-1.68145
1	Nsylvestris_NODE_11413_length_1940_cov_175	SBP1_ANTMA^SBP1_ANTMA^Q:1786-1484,H:1-104^55.66%ID^E:1.85e-25^RecName: Full=Squamosa promoter-binding protein 1;^Eukaryota; Viridiplantae; Streptophyta; Embryophyta; Tracheophyta; Spermatophyta; Magnoliopsida; eudicotyledons; Gunneridae; Pentapetalae; asterids; lamiids; Lamiales; Plantaginaceae; Antirrhineae; Antirrhinum`SBP1_ANTMA^SBP1_ANTMA^Q:460-371,H:97-126^90%ID^E:1.05e-09^RecName: Full=Squa…	0.815247	1.17332	0.520014	0.742991	0.0948784	1.19794	2.13886	2.16407	0.970263	0.859559	0.598294	1.0211	1.23413	0.363828	-4.6908	-3.51289	-5.6908
1	Nsylvestris_NODE_11414_length_1939_cov_45	.	0.176161	0.904666	0.140573	0.276634	-0.860869	0.817203	1.98472	1.40156	1.57209	-0.597835	1.13913	0.624558	0.904666	1.06513	-3.1828	-3.1828	-3.1828
1	Nsylvestris_NODE_11415_length_1940_cov_37	AZG2_ARATH^AZG2_ARATH^Q:1884-262,H:1-530^64.51%ID^E:0^RecName: Full=Adenine/guanine permease AZG2;^Eukaryota; Viridiplantae; Streptophyta; Embryophyta; Tracheophyta; Spermatophyta; Magnoliopsida; eudicotyledons; Gunneridae; Pentapetalae; rosids; malvids; Brassicales; Brassicaceae; Camelineae; Arabidopsis	-0.558607	-0.245892	0.0597812	-0.0466525	-1.22795	2.46022	2.74072	2.51199	0.00736529	0.357863	0.492792	-0.82978	-0.768594	-0.953496	-0.460068	-2.12237	-1.41732
1	Nsylvestris_NODE_11418_length_1939_cov_120	SBT3_SOLLC^SBT3_SOLLC^Q:1937-183,H:177-761^91.795%ID^E:0^RecName: Full=Subtilisin-like protease SBT3 {ECO:0000303|PubMed:27259555};^Eukaryota; Viridiplantae; Streptophyta; Embryophyta; Tracheophyta; Spermatophyta; Magnoliopsida; eudicotyledons; Gunneridae; Pentapetalae; asterids; lamiids; Solanales; Solanaceae; Solanoideae; Solaneae; Solanum; Lycopersicon	1.46763	1.84789	0.672795	2.10247	1.24616	0.513069	0.327369	0.211196	0.524373	-2.79623	-0.471658	1.94907	1.18126	0.0139579	-2.07256	-2.79623	-3.92056
1	Nsylvestris_NODE_11420_length_1939_cov_44	CPR1_ARATH^CPR1_ARATH^Q:448-1197,H:101-351^32.21%ID^E:3.05e-44^RecName: Full=F-box protein CPR1;^Eukaryota; Viridiplantae; Streptophyta; Embryophyta; Tracheophyta; Spermatophyta; Magnoliopsida; eudicotyledons; Gunneridae; Pentapetalae; rosids; malvids; Brassicales; Brassicaceae; Camelineae; Arabidopsis`CPR1_ARATH^CPR1_ARATH^Q:140-445,H:1-99^36.275%ID^E:3.05e-44^RecName: Full=F-box protein CPR1;^E…	-2.39971	-0.145113	-1.26352	-2.41712	-0.633324	2.98469	3.28954	2.99919	-0.352867	-2.13667	0.343592	-0.26286	-0.53023	-1.26746	1.27927	0.524393	-0.0117932
1	Nsylvestris_NODE_11421_length_1939_cov_28	.	0.243844	0.606414	-0.978548	-0.104079	-0.104079	1.19138	1.08035	-0.104079	1.64711	0.021452	0.523952	-1.24158	0.684417	1.08035	-2.56351	-0.7418	-1.24158
1	Nsylvestris_NODE_11422_length_1939_cov_14	Y5537_ARATH^Y5537_ARATH^Q:5-1825,H:275-872^51.935%ID^E:0^RecName: Full=G-type lectin S-receptor-like serine/threonine-protein kinase At5g35370;^Eukaryota; Viridiplantae; Streptophyta; Embryophyta; Tracheophyta; Spermatophyta; Magnoliopsida; eudicotyledons; Gunneridae; Pentapetalae; rosids; malvids; Brassicales; Brassicaceae; Camelineae; Arabidopsis	-0.313819	0.425553	-1.24102	0.563056	-0.311413	1.27355	1.95462	2.38903	0.27355	-0.896375	0.688587	1.65453	0.805174	1.42411	-2.89638	-2.89638	-2.89638
1	Nsylvestris_NODE_11426_length_1938_cov_77	P2C55_ARATH^P2C55_ARATH^Q:301-1416,H:94-458^53.439%ID^E:4.13e-122^RecName: Full=Probable protein phosphatase 2C 55;^Eukaryota; Viridiplantae; Streptophyta; Embryophyta; Tracheophyta; Spermatophyta; Magnoliopsida; eudicotyledons; Gunneridae; Pentapetalae; rosids; malvids; Brassicales; Brassicaceae; Camelineae; Arabidopsis	1.29901	2.2055	1.11848	0.523977	0.0833033	1.77714	1.35589	1.77491	1.2907	-0.230467	0.749961	0.840435	0.526811	0.116601	-4.82263	-4.82263	-3.787
1	Nsylvestris_NODE_11427_length_1938_cov_72	.	-0.0796346	1.68526	0.34475	0.727308	-0.153635	1.90222	1.90222	1.80789	1.64283	0.545168	1.32636	0.72772	1.05787	-0.231638	-4.40156	-4.40156	-4.40156
1	Nsylvestris_NODE_11428_length_1938_cov_34	.	0.983427	2.58657	0.81237	-0.253471	0.333491	1.28701	0.67684	1.35465	1.68609	0.350706	1.35202	0.650349	1.07072	1.17451	-4.68843	-4.68843	-4.68843
1	Nsylvestris_NODE_11430_length_1937_cov_227	DNJA6_ARATH^DNJA6_ARATH^Q:238-1563,H:1-439^72.072%ID^E:0^RecName: Full=Chaperone protein dnaJ A6, chloroplastic {ECO:0000305};^Eukaryota; Viridiplantae; Streptophyta; Embryophyta; Tracheophyta; Spermatophyta; Magnoliopsida; eudicotyledons; Gunneridae; Pentapetalae; rosids; malvids; Brassicales; Brassicaceae; Camelineae; Arabidopsis	-0.0733098	0.658732	-0.155943	-0.0665887	-0.984059	1.11564	1.74423	1.79604	0.814861	0.271472	0.792205	0.467557	0.227967	-0.025326	-1.64624	-1.94865	-2.98859
1	Nsylvestris_NODE_11433_length_1937_cov_217	CDKD1_ORYSJ^CDKD1_ORYSJ^Q:1693-488,H:8-417^74.696%ID^E:0^RecName: Full=Cyclin-dependent kinase D-1;^Eukaryota; Viridiplantae; Streptophyta; Embryophyta; Tracheophyta; Spermatophyta; Magnoliopsida; Liliopsida; Poales; Poaceae; BOP clade; Oryzoideae; Oryzeae; Oryzinae; Oryza; Oryza sativa	0.526705	1.26083	-0.11395	0.361421	-1.2214	1.30171	1.32886	1.53734	0.715722	-0.383604	0.00492342	-0.021966	0.358202	0.00148925	-1.23889	-2.07524	-2.34215
1	Nsylvestris_NODE_11438_length_1937_cov_113	KN7O_ARATH^KN7O_ARATH^Q:1930-191,H:697-1271^44.822%ID^E:5.42e-123^RecName: Full=Kinesin-like protein KIN-7O {ECO:0000305};^Eukaryota; Viridiplantae; Streptophyta; Embryophyta; Tracheophyta; Spermatophyta; Magnoliopsida; eudicotyledons; Gunneridae; Pentapetalae; rosids; malvids; Brassicales; Brassicaceae; Camelineae; Arabidopsis	-0.574647	0.809288	0.104896	0.461812	0.237593	1.55525	1.60334	1.55525	0.376923	0.534064	0.205545	0.528096	0.845732	-0.52004	-4.3274	-0.269945	-3.12576
1	Nsylvestris_NODE_11440_length_1937_cov_68	PPR35_ARATH^PPR35_ARATH^Q:494-1390,H:53-360^45.13%ID^E:1.51e-79^RecName: Full=Pentatricopeptide repeat-containing protein At1g11900;^Eukaryota; Viridiplantae; Streptophyta; Embryophyta; Tracheophyta; Spermatophyta; Magnoliopsida; eudicotyledons; Gunneridae; Pentapetalae; rosids; malvids; Brassicales; Brassicaceae; Camelineae; Arabidopsis	0.571479	2.01728	0.800961	0.357354	-0.0385744	1.41394	1.75789	1.59614	1.54639	-0.116577	1.23737	0.0354262	1.23737	0.443051	-4.2865	-4.2865	-4.2865
1	Nsylvestris_NODE_11442_length_1936_cov_224	MMK2_MEDSA^MMK2_MEDSA^Q:325-1416,H:4-368^86.027%ID^E:0^RecName: Full=Mitogen-activated protein kinase homolog MMK2;^Eukaryota; Viridiplantae; Streptophyta; Embryophyta; Tracheophyta; Spermatophyta; Magnoliopsida; eudicotyledons; Gunneridae; Pentapetalae; rosids; fabids; Fabales; Fabaceae; Papilionoideae; 50 kb inversion clade; NPAAA clade; Hologalegina; IRL clade; Trifolieae; Medicago	0.565166	1.25413	-0.0364805	0.728845	-0.505494	1.36074	1.66851	1.57108	0.901115	0.0156526	0.632425	0.388587	0.333778	0.200407	-2.03052	-3.93509	-3.11285
1	Nsylvestris_NODE_11444_length_1936_cov_209	ERD7_ARATH^ERD7_ARATH^Q:321-1562,H:3-429^56.422%ID^E:5.5e-145^RecName: Full=Protein EARLY-RESPONSIVE TO DEHYDRATION 7, chloroplastic {ECO:0000303|PubMed:8075396};^Eukaryota; Viridiplantae; Streptophyta; Embryophyta; Tracheophyta; Spermatophyta; Magnoliopsida; eudicotyledons; Gunneridae; Pentapetalae; rosids; malvids; Brassicales; Brassicaceae; Camelineae; Arabidopsis	0.481027	1.17981	0.550194	0.89207	0.521987	2.07102	2.62182	1.80854	1.40395	1.41487	0.552117	1.42891	1.06477	0.761548	-7.3104	-4.4624	-4.97984
1	Nsylvestris_NODE_11448_length_1936_cov_137	.	0.707202	0.868133	1.3835	-0.731978	0.00498769	2.6138	2.86376	0.503749	0.852985	-1.73198	0.491445	0.268022	2.12799	-0.270799	-3.31694	-3.31694	-3.31694
1	Nsylvestris_NODE_11449_length_1936_cov_127	FLZ10_ARATH^FLZ10_ARATH^Q:1618-599,H:13-307^36.695%ID^E:5.04e-37^RecName: Full=FCS-Like Zinc finger 10 {ECO:0000303|PubMed:24901469};^Eukaryota; Viridiplantae; Streptophyta; Embryophyta; Tracheophyta; Spermatophyta; Magnoliopsida; eudicotyledons; Gunneridae; Pentapetalae; rosids; malvids; Brassicales; Brassicaceae; Camelineae; Arabidopsis	0.50154	1.22282	-0.0675011	0.840768	0.3093	2.00132	2.42471	1.91671	-0.257631	0.141144	0.728977	-0.362295	-0.201905	-0.0701852	-4.19813	-2.40329	-2.52636
1	Nsylvestris_NODE_11453_length_1936_cov_43	PGLR4_ARATH^PGLR4_ARATH^Q:1470-280,H:79-473^63.224%ID^E:0^RecName: Full=Polygalacturonase At1g48100;^Eukaryota; Viridiplantae; Streptophyta; Embryophyta; Tracheophyta; Spermatophyta; Magnoliopsida; eudicotyledons; Gunneridae; Pentapetalae; rosids; malvids; Brassicales; Brassicaceae; Camelineae; Arabidopsis	1.60942	2.66134	1.0996	0.985925	-1.09792	0.993714	2.10063	2.29327	0.872213	-0.11936	0.662043	-2.70673	-2.70673	0.458383	-2.70673	-1.69237	-2.70673
1	Nsylvestris_NODE_11454_length_1936_cov_9	.	0.0867569	0.979842	-0.39867	0.864365	-0.135635	2.08676	1.18629	1.18629	-0.135635	-1.13564	0.279402	0.0867569	0.449327	0.0867569	-1.10236	-1.66401	-2.7206
1	Nsylvestris_NODE_11458_length_1933_cov_122	OTU9_ARATH^OTU9_ARATH^Q:1545-856,H:4-239^35.656%ID^E:6.07e-23^RecName: Full=OVARIAN TUMOR DOMAIN-containing deubiquitinating enzyme 9 {ECO:0000303|PubMed:24659992};^Eukaryota; Viridiplantae; Streptophyta; Embryophyta; Tracheophyta; Spermatophyta; Magnoliopsida; eudicotyledons; Gunneridae; Pentapetalae; rosids; malvids; Brassicales; Brassicaceae; Camelineae; Arabidopsis	0.391851	1.10421	0.579307	0.349801	0.684234	1.05115	2.00119	0.662036	0.360496	-0.141838	0.0691085	-0.228935	0.31586	0.107548	-1.70657	-1.62572	-3.97374
1	Nsylvestris_NODE_11459_length_1935_cov_72	.	-0.49418	-0.638226	-0.0532635	0.683702	-1.63823	2.44924	2.73959	1.6837	0.946736	-0.638226	0.368969	-1.63823	0.361774	-1.63823	0.781313	-1.63823	-1.63823
1	Nsylvestris_NODE_1146_length_4763_cov_36	.	-0.0292393	1.28457	0.1012	0.389265	-0.932663	0.974227	1.04919	1.52204	1.2685	-0.00628422	0.578299	0.137726	0.240464	0.300611	-1.80701	-2.25459	-2.8163
1	Nsylvestris_NODE_11464_length_1934_cov_197	CAND7_ARATH^CAND7_ARATH^Q:1622-426,H:22-421^52.12%ID^E:4.04e-139^RecName: Full=Protein CANDIDATE G-PROTEIN COUPLED RECEPTOR 7 {ECO:0000303|PubMed:18671868};^Eukaryota; Viridiplantae; Streptophyta; Embryophyta; Tracheophyta; Spermatophyta; Magnoliopsida; eudicotyledons; Gunneridae; Pentapetalae; rosids; malvids; Brassicales; Brassicaceae; Camelineae; Arabidopsis	0.586178	2.69469	1.05338	0.422256	0.873655	0.551727	0.288693	0.965863	1.21393	-0.711307	0.942212	0.965863	-0.714195	-1.03324	-2.03324	-3.03324	-3.03324
1	Nsylvestris_NODE_11468_length_1934_cov_46	NPR5_ARATH^NPR5_ARATH^Q:1620-253,H:20-472^77.44%ID^E:0^RecName: Full=Regulatory protein NPR5;^Eukaryota; Viridiplantae; Streptophyta; Embryophyta; Tracheophyta; Spermatophyta; Magnoliopsida; eudicotyledons; Gunneridae; Pentapetalae; rosids; malvids; Brassicales; Brassicaceae; Camelineae; Arabidopsis	0.113829	1.12137	0.332848	0.166848	0.238126	1.32261	1.39802	0.803001	1.17638	0.237529	0.943528	-0.0418114	0.413562	-0.485027	-2.89744	-2.18695	-2.65643
1	Nsylvestris_NODE_11471_length_1933_cov_203	SBT3_SOLLC^SBT3_SOLLC^Q:1931-156,H:177-761^82.631%ID^E:0^RecName: Full=Subtilisin-like protease SBT3 {ECO:0000303|PubMed:27259555};^Eukaryota; Viridiplantae; Streptophyta; Embryophyta; Tracheophyta; Spermatophyta; Magnoliopsida; eudicotyledons; Gunneridae; Pentapetalae; asterids; lamiids; Solanales; Solanaceae; Solanoideae; Solaneae; Solanum; Lycopersicon	1.12251	1.97558	1.66483	2.05059	0.680063	1.80267	1.01005	2.03334	-0.016593	-1.29091	-1.00496	0.731087	0.893697	-0.623811	-4.78838	-3.50186	-2.73791
1	Nsylvestris_NODE_11476_length_1933_cov_35	.	-0.351742	1.23322	0.348698	0.555149	-1.35174	1.77754	2.26297	1.60245	1.3487	0.555149	1.10769	0.348698	-0.0298138	0.648258	-3.35174	-3.35174	-3.35174
1	Nsylvestris_NODE_11487_length_1932_cov_58	Y4844_ARATH^Y4844_ARATH^Q:1405-1584,H:90-149^71.667%ID^E:4.43e-22^RecName: Full=Uncharacterized protein At4g28440;^Eukaryota; Viridiplantae; Streptophyta; Embryophyta; Tracheophyta; Spermatophyta; Magnoliopsida; eudicotyledons; Gunneridae; Pentapetalae; rosids; malvids; Brassicales; Brassicaceae; Camelineae; Arabidopsis	0.21214	1.26444	0.546658	1.01571	0.118953	1.5226	2.01527	1.29859	0.794289	0.194792	0.449237	0.572856	0.660837	0.281525	-4.74148	-3.12133	-3.08509
1	Nsylvestris_NODE_11492_length_1931_cov_187	SAPK2_ORYSI^SAPK2_ORYSI^Q:243-1274,H:1-339^76.744%ID^E:0^RecName: Full=Serine/threonine-protein kinase SAPK2;^Eukaryota; Viridiplantae; Streptophyta; Embryophyta; Tracheophyta; Spermatophyta; Magnoliopsida; Liliopsida; Poales; Poaceae; BOP clade; Oryzoideae; Oryzeae; Oryzinae; Oryza; Oryza sativa	-0.473601	0.557854	0.466402	0.792395	0.0312742	1.49454	2.0795	1.25891	0.306855	0.380034	0.20944	-0.0125708	0.468617	-1.5751	-1.57054	-1.44774	-2.96628
1	Nsylvestris_NODE_11494_length_1931_cov_151	SDI1_ARATH^SDI1_ARATH^Q:200-1030,H:26-306^65.018%ID^E:4.15e-124^RecName: Full=Protein SULFUR DEFICIENCY-INDUCED 1 {ECO:0000303|PubMed:19154231};^Eukaryota; Viridiplantae; Streptophyta; Embryophyta; Tracheophyta; Spermatophyta; Magnoliopsida; eudicotyledons; Gunneridae; Pentapetalae; rosids; malvids; Brassicales; Brassicaceae; Camelineae; Arabidopsis	-0.401842	0.962108	0.624631	1.53536	-0.00698197	2.32709	1.64417	1.61146	1.49719	0.66345	2.10856	1.04304	0.376523	0.351541	-4.94884	-3.23073	-6.15673
1	Nsylvestris_NODE_11496_length_1931_cov_123	.	0.512622	1.53714	0.344806	1.25416	1.23016	2.49726	2.29003	2.03401	0.223785	0.0468434	0.631436	0.0468434	1.10187	0.20649	-4.65249	-4.65249	-4.65249
1	Nsylvestris_NODE_11498_length_1931_cov_18	RNHX1_ARATH^RNHX1_ARATH^Q:161-346,H:13-74^38.71%ID^E:1.24e-17^RecName: Full=Putative ribonuclease H protein At1g65750;^Eukaryota; Viridiplantae; Streptophyta; Embryophyta; Tracheophyta; Spermatophyta; Magnoliopsida; eudicotyledons; Gunneridae; Pentapetalae; rosids; malvids; Brassicales; Brassicaceae; Camelineae; Arabidopsis`RNHX1_ARATH^RNHX1_ARATH^Q:418-669,H:99-191^28.723%ID^E:1.24e-17^RecName: …	0.457382	2.31536	1.04234	0.457382	0.627307	1.54484	2.04234	0.916814	1.54484	0.0423445	0.264737	-0.542618	-0.542618	-2.54262	-2.54262	-2.54262	-2.54262
1	Nsylvestris_NODE_115_length_8164_cov_61	.	0.632681	2.09925	1.32754	0.658934	0.466032	2.91741	2.45123	2.29443	1.91137	-0.128532	1.92696	-5.14868	-2.49104	-3.17048	-2.4842	-1.55652	-1.7064
1	Nsylvestris_NODE_1150_length_4756_cov_230	CLASP_ARATH^CLASP_ARATH^Q:4544-270,H:1-1438^72.23%ID^E:0^RecName: Full=CLIP-associated protein;^Eukaryota; Viridiplantae; Streptophyta; Embryophyta; Tracheophyta; Spermatophyta; Magnoliopsida; eudicotyledons; Gunneridae; Pentapetalae; rosids; malvids; Brassicales; Brassicaceae; Camelineae; Arabidopsis	0.118151	1.0394	-0.170483	0.0320463	-0.602959	1.97405	1.55275	1.82926	1.37075	-0.098585	0.903638	0.513472	0.793763	0.531175	-3.36286	-2.78443	-3.63914
1	Nsylvestris_NODE_11502_length_1930_cov_199	DJC27_ORYSJ^DJC27_ORYSJ^Q:1823-108,H:5-582^53.621%ID^E:0^RecName: Full=DnaJ protein ERDJ3A {ECO:0000305};^Eukaryota; Viridiplantae; Streptophyta; Embryophyta; Tracheophyta; Spermatophyta; Magnoliopsida; Liliopsida; Poales; Poaceae; BOP clade; Oryzoideae; Oryzeae; Oryzinae; Oryza; Oryza sativa	1.66471	2.08146	0.637346	0.310075	0.166106	2.17178	1.96433	2.02007	1.84516	-1.92572	2.47825	1.13623	0.878396	0.84705	-5.66881	-5.66881	-4.93762
1	Nsylvestris_NODE_11503_length_1930_cov_179	HSFA5_ARATH^HSFA5_ARATH^Q:1767-391,H:24-466^54.565%ID^E:2.78e-162^RecName: Full=Heat stress transcription factor A-5;^Eukaryota; Viridiplantae; Streptophyta; Embryophyta; Tracheophyta; Spermatophyta; Magnoliopsida; eudicotyledons; Gunneridae; Pentapetalae; rosids; malvids; Brassicales; Brassicaceae; Camelineae; Arabidopsis	0.334516	0.978153	0.134519	1.11112	0.254525	1.7607	1.29704	1.11717	0.719691	-0.960766	0.502862	-1.04209	0.433942	0.0162688	-2.38904	-1.92046	-2.34815
1	Nsylvestris_NODE_1151_length_4756_cov_109	POLR2_ARATH^POLR2_ARATH^Q:1173-646,H:1041-1232^35.052%ID^E:7.2e-62^RecName: Full=Retrovirus-related Pol polyprotein from transposon RE2;^Eukaryota; Viridiplantae; Streptophyta; Embryophyta; Tracheophyta; Spermatophyta; Magnoliopsida; eudicotyledons; Gunneridae; Pentapetalae; rosids; malvids; Brassicales; Brassicaceae; Camelineae; Arabidopsis`POLR2_ARATH^POLR2_ARATH^Q:303-13,H:1349-1450^41.176%ID^…	1.92945	2.63995	1.85249	1.44403	1.05498	3.49556	3.36311	2.90107	2.71795	1.02022	2.60518	-4.33733	-4.33733	-3.33733	-4.33733	-4.33733	-4.33733
1	Nsylvestris_NODE_11511_length_1929_cov_121	FBK50_ARATH^FBK50_ARATH^Q:1424-270,H:40-422^26.897%ID^E:1.91e-15^RecName: Full=F-box/kelch-repeat protein At3g06240;^Eukaryota; Viridiplantae; Streptophyta; Embryophyta; Tracheophyta; Spermatophyta; Magnoliopsida; eudicotyledons; Gunneridae; Pentapetalae; rosids; malvids; Brassicales; Brassicaceae; Camelineae; Arabidopsis	1.09557	1.83253	1.09557	1.28821	1.02518	4.38975	4.27311	4.17898	0.610141	-1.29675	-0.711788	-2.29675	-3.29675	-3.29675	-2.29675	-3.29675	-3.29675
1	Nsylvestris_NODE_11512_length_1929_cov_111	C7A12_PANGI^C7A12_PANGI^Q:279-1637,H:45-500^57.952%ID^E:0^RecName: Full=Cytochrome P450 CYP736A12;^Eukaryota; Viridiplantae; Streptophyta; Embryophyta; Tracheophyta; Spermatophyta; Magnoliopsida; eudicotyledons; Gunneridae; Pentapetalae; asterids; campanulids; Apiales; Araliaceae; Panax	-0.676307	0.242163	-0.774881	-0.12882	-1.16173	3.085	2.21464	2.43059	1.25373	0.671452	1.96839	1.89565	1.25457	1.41863	-4.36853	-4.48811	-4.83644
1	Nsylvestris_NODE_11516_length_1928_cov_224	ACY1_MOUSE^ACY1_MOUSE^Q:1741-530,H:13-400^41.235%ID^E:1.26e-92^RecName: Full=Aminoacylase-1;^Eukaryota; Metazoa; Chordata; Craniata; Vertebrata; Euteleostomi; Mammalia; Eutheria; Euarchontoglires; Glires; Rodentia; Myomorpha; Muroidea; Muridae; Murinae; Mus; Mus	0.464166	1.65067	0.531442	0.764165	-0.316048	1.5116	1.77632	1.89367	1.53852	0.858272	1.47965	0.681693	0.656	0.374681	-5.64188	-4.34026	-3.88266
1	Nsylvestris_NODE_11518_length_1928_cov_133	ALG10_ARATH^ALG10_ARATH^Q:1131-382,H:259-509^60.236%ID^E:5.07e-89^RecName: Full=Dol-P-Glc:Glc(2)Man(9)GlcNAc(2)-PP-Dol alpha-1,2-glucosyltransferase {ECO:0000305};^Eukaryota; Viridiplantae; Streptophyta; Embryophyta; Tracheophyta; Spermatophyta; Magnoliopsida; eudicotyledons; Gunneridae; Pentapetalae; rosids; malvids; Brassicales; Brassicaceae; Camelineae; Arabidopsis	0.732598	1.06708	-0.0259688	-0.0691186	-0.128736	1.03579	1.66911	1.37625	1.16986	0.622116	0.600804	0.560953	0.664317	0.208443	-4.15686	-3.16861	-2.15803
1	Nsylvestris_NODE_11521_length_1928_cov_58	CCLOP_MEDTR^CCLOP_MEDTR^Q:1824-277,H:6-513^52.652%ID^E:2.94e-124^RecName: Full=Protein CYCLOPS {ECO:0000303|PubMed:19074278};^Eukaryota; Viridiplantae; Streptophyta; Embryophyta; Tracheophyta; Spermatophyta; Magnoliopsida; eudicotyledons; Gunneridae; Pentapetalae; rosids; fabids; Fabales; Fabaceae; Papilionoideae; 50 kb inversion clade; NPAAA clade; Hologalegina; IRL clade; Trifolieae; Medicago	1.30855	1.79398	0.793977	-0.69145	-0.428415	2.27202	2.57158	1.15655	-2.01338	0.156547	0.446054	-0.206023	0.30855	-1.01338	-1.42842	-2.01338	-3.01338
1	Nsylvestris_NODE_11522_length_1927_cov_147	DTX35_ARATH^DTX35_ARATH^Q:50-1501,H:1-478^68.388%ID^E:0^RecName: Full=Protein DETOXIFICATION 35 {ECO:0000303|PubMed:11739388};^Eukaryota; Viridiplantae; Streptophyta; Embryophyta; Tracheophyta; Spermatophyta; Magnoliopsida; eudicotyledons; Gunneridae; Pentapetalae; rosids; malvids; Brassicales; Brassicaceae; Camelineae; Arabidopsis	1.26575	1.86521	0.336899	1.88066	-0.114578	1.96049	2.03603	2.17591	1.0377	1.32206	0.420002	0.499791	0.356119	0.175435	-5.07249	-5.07249	-5.07249
1	Nsylvestris_NODE_11523_length_1925_cov_132	FB119_ARATH^FB119_ARATH^Q:1881-913,H:13-336^45.783%ID^E:5.67e-79^RecName: Full=F-box protein At2g27310;^Eukaryota; Viridiplantae; Streptophyta; Embryophyta; Tracheophyta; Spermatophyta; Magnoliopsida; eudicotyledons; Gunneridae; Pentapetalae; rosids; malvids; Brassicales; Brassicaceae; Camelineae; Arabidopsis	0.950884	1.64113	0.437062	0.619134	-0.451823	1.00849	1.26831	0.495121	2.43133	2.05727	1.9861	0.848847	0.421361	0.563328	-4.8972	-2.8972	-6.48216
1	Nsylvestris_NODE_11528_length_1927_cov_71	.	-1.11565	1.4722	0.748798	-1.92373	0.44991	1.81248	1.65532	2.05716	2.15687	-1.84973	1.06101	0.88724	1.51951	-0.627333	-2.43469	-3.43469	-2.43469
1	Nsylvestris_NODE_1153_length_4751_cov_132	ZDHC9_ARATH^ZDHC9_ARATH^Q:4209-2929,H:1-425^66.977%ID^E:0^RecName: Full=Probable protein S-acyltransferase 7;^Eukaryota; Viridiplantae; Streptophyta; Embryophyta; Tracheophyta; Spermatophyta; Magnoliopsida; eudicotyledons; Gunneridae; Pentapetalae; rosids; malvids; Brassicales; Brassicaceae; Camelineae; Arabidopsis	0.947783	2.04625	0.970056	1.14942	0.0515801	1.73242	1.86463	1.61383	0.901697	-0.206645	0.520137	0.839082	0.620394	0.429691	-5.27644	-4.28299	-3.92091
1	Nsylvestris_NODE_11531_length_1927_cov_9	.	1.5271	2.09538	-1.74592	-3.33089	-1.33089	3.94524	3.66911	3.04415	1.71351	0.476469	1.62284	-1.00896	-1.74592	-0.523531	-1.74592	-3.33089	-3.33089
1	Nsylvestris_NODE_11532_length_1926_cov_208	Y1571_ARATH^Y1571_ARATH^Q:231-1925,H:29-620^46.723%ID^E:2.59e-118^RecName: Full=Probable leucine-rich repeat receptor-like protein kinase At1g35710;^Eukaryota; Viridiplantae; Streptophyta; Embryophyta; Tracheophyta; Spermatophyta; Magnoliopsida; eudicotyledons; Gunneridae; Pentapetalae; rosids; malvids; Brassicales; Brassicaceae; Camelineae; Arabidopsis`Y1571_ARATH^Y1571_ARATH^Q:468-1925,H:208-73…	2.51967	3.12241	2.38436	2.12132	2.44325	1.38436	-0.615641	0.384359	-2.2006	-2.2006	-0.615641	0.606751	-0.531577	-2.2006	-2.2006	-2.2006	-2.2006
1	Nsylvestris_NODE_11533_length_1926_cov_191	CTU2_ARATH^CTU2_ARATH^Q:140-1426,H:37-456^57.11%ID^E:3.02e-156^RecName: Full=Cytoplasmic tRNA 2-thiolation protein 2 {ECO:0000255|HAMAP-Rule:MF_03054};^Eukaryota; Viridiplantae; Streptophyta; Embryophyta; Tracheophyta; Spermatophyta; Magnoliopsida; eudicotyledons; Gunneridae; Pentapetalae; rosids; malvids; Brassicales; Brassicaceae; Camelineae; Arabidopsis	-0.153041	0.795688	0.211171	0.289413	0.263371	1.50041	1.09987	1.01061	0.931426	-0.636612	0.501066	-0.117719	1.10002	-0.151323	-2.58607	-1.47962	-2.57866
1	Nsylvestris_NODE_11539_length_1926_cov_10	.	-2.16345	-1.16345	-1.16345	-0.578487	-0.578487	1.53699	2.22887	1.64391	0.158479	-0.578487	0.158479	1.92401	2.22887	0.836551	-1.16345	-1.16345	-2.16345
1	Nsylvestris_NODE_11540_length_1925_cov_177	ROC1_NICSY^ROC1_NICSY^Q:265-903,H:54-266^100%ID^E:1.12e-119^RecName: Full=29 kDa ribonucleoprotein A, chloroplastic;^Eukaryota; Viridiplantae; Streptophyta; Embryophyta; Tracheophyta; Spermatophyta; Magnoliopsida; eudicotyledons; Gunneridae; Pentapetalae; asterids; lamiids; Solanales; Solanaceae; Nicotianoideae; Nicotianeae; Nicotiana	0.684768	1.65283	0.484063	0.607138	-0.66698	0.816616	1.63574	1.22142	0.801659	0.680969	1.00612	0.229009	-0.0262354	0.14343	-3.07667	-2.87528	-3.3186
1	Nsylvestris_NODE_11545_length_1925_cov_12	.	1.0627	1.64766	0.725666	-0.522262	0.477738	1.72567	2.72567	1.38463	1.38463	-0.714907	1.60702	-0.937299	0.062701	-0.0628299	-3.52226	-3.52226	-3.52226
1	Nsylvestris_NODE_11550_length_1924_cov_211	CDS4_ARATH^CDS4_ARATH^Q:1493-498,H:56-391^73.81%ID^E:1.03e-139^RecName: Full=Phosphatidate cytidylyltransferase 4, chloroplastic {ECO:0000303|PubMed:20442275};^Eukaryota; Viridiplantae; Streptophyta; Embryophyta; Tracheophyta; Spermatophyta; Magnoliopsida; eudicotyledons; Gunneridae; Pentapetalae; rosids; malvids; Brassicales; Brassicaceae; Camelineae; Arabidopsis	0.59044	1.36892	0.586741	0.382306	0.222425	1.55797	2.03215	1.98618	1.18747	0.175536	1.15056	0.56241	0.862218	0.728052	-6.21692	-4.30036	-2.8761
1	Nsylvestris_NODE_11553_length_1924_cov_155	LAC11_ARATH^LAC11_ARATH^Q:45-1652,H:22-557^77.985%ID^E:0^RecName: Full=Laccase-11;^Eukaryota; Viridiplantae; Streptophyta; Embryophyta; Tracheophyta; Spermatophyta; Magnoliopsida; eudicotyledons; Gunneridae; Pentapetalae; rosids; malvids; Brassicales; Brassicaceae; Camelineae; Arabidopsis	1.15777	1.37085	0.514096	0.618894	-0.0551012	0.851847	0.579594	0.778571	0.574034	-1.36703	-0.131162	0.544774	0.83456	-0.225834	-2.06773	-1.48115	-2.49698
1	Nsylvestris_NODE_11557_length_1923_cov_221	STR4_ARATH^STR4_ARATH^Q:149-1264,H:1-368^62.567%ID^E:9.69e-142^RecName: Full=Rhodanese-like domain-containing protein 4, chloroplastic;^Eukaryota; Viridiplantae; Streptophyta; Embryophyta; Tracheophyta; Spermatophyta; Magnoliopsida; eudicotyledons; Gunneridae; Pentapetalae; rosids; malvids; Brassicales; Brassicaceae; Camelineae; Arabidopsis	0.139208	1.16742	0.366009	-0.0733015	0.470747	1.76488	1.79867	1.84147	1.38379	0.583202	1.29515	0.844905	1.01	0.81873	-4.14883	-3.92409	-5.33795
1	Nsylvestris_NODE_11564_length_1923_cov_89	BARD1_ARATH^BARD1_ARATH^Q:1415-258,H:332-711^50.129%ID^E:4.51e-134^RecName: Full=BRCA1-associated RING domain protein 1 {ECO:0000303|PubMed:18591352};^Eukaryota; Viridiplantae; Streptophyta; Embryophyta; Tracheophyta; Spermatophyta; Magnoliopsida; eudicotyledons; Gunneridae; Pentapetalae; rosids; malvids; Brassicales; Brassicaceae; Camelineae; Arabidopsis	-0.0329323	1.57443	-0.476515	-0.194115	0.491187	1.57322	1.10374	0.531345	0.798705	0.645521	0.284475	0.530107	0.634809	0.414079	-3.51264	-1.4332	-2.93222
1	Nsylvestris_NODE_11567_length_1922_cov_201	GPT_DICDI^GPT_DICDI^Q:336-1307,H:38-386^51.714%ID^E:2.88e-89^RecName: Full=UDP-N-acetylglucosamine--dolichyl-phosphate N-acetylglucosaminephosphotransferase;^Eukaryota; Amoebozoa; Mycetozoa; Dictyostelids; Dictyosteliales; Dictyosteliaceae; Dictyostelium	0.0295103	0.843901	0.0671665	0.180631	-0.720043	1.49708	1.88019	1.3052	0.913949	-0.725463	0.691067	0.884467	1.13577	0.520037	-2.88042	-3.5257	-2.09735
1	Nsylvestris_NODE_11570_length_1922_cov_194	BH062_ARATH^BH062_ARATH^Q:1564-395,H:82-437^38.876%ID^E:3.43e-64^RecName: Full=Transcription factor bHLH62;^Eukaryota; Viridiplantae; Streptophyta; Embryophyta; Tracheophyta; Spermatophyta; Magnoliopsida; eudicotyledons; Gunneridae; Pentapetalae; rosids; malvids; Brassicales; Brassicaceae; Camelineae; Arabidopsis	0.181783	1.23068	0.566252	0.51829	-0.0511612	1.93286	2.31758	1.54908	1.83625	0.462235	1.3328	-0.120051	0.437568	0.115186	-4.25201	-3.42826	-4.62908
1	Nsylvestris_NODE_11576_length_1922_cov_41	R1A6_SOLDE^R1A6_SOLDE^Q:9-1598,H:718-1232^31.569%ID^E:2.44e-48^RecName: Full=Putative late blight resistance protein homolog R1A-6;^Eukaryota; Viridiplantae; Streptophyta; Embryophyta; Tracheophyta; Spermatophyta; Magnoliopsida; eudicotyledons; Gunneridae; Pentapetalae; asterids; lamiids; Solanales; Solanaceae; Solanoideae; Solaneae; Solanum	0.0756764	1.31988	-0.0185061	0.0156954	-1.90063	1.69635	1.30768	1.69151	0.492419	-0.489433	-0.212937	0.74246	-0.397564	-0.391823	-1.08399	-1.8759	-0.970898
1	Nsylvestris_NODE_11579_length_1921_cov_215	MLO6_ARATH^MLO6_ARATH^Q:124-1674,H:6-548^55.898%ID^E:0^RecName: Full=MLO-like protein 6;^Eukaryota; Viridiplantae; Streptophyta; Embryophyta; Tracheophyta; Spermatophyta; Magnoliopsida; eudicotyledons; Gunneridae; Pentapetalae; rosids; malvids; Brassicales; Brassicaceae; Camelineae; Arabidopsis	-0.372279	0.635722	-0.324354	-0.270383	-0.537023	1.42013	1.54318	1.66955	0.722766	0.316958	0.222236	0.418466	0.393838	0.64355	-2.03067	-2.11825	-2.33344
1	Nsylvestris_NODE_11584_length_1921_cov_74	UNG_ARATH^UNG_ARATH^Q:124-1080,H:1-330^65.868%ID^E:5.77e-133^RecName: Full=Uracil-DNA glycosylase, mitochondrial {ECO:0000303|PubMed:20056608};^Eukaryota; Viridiplantae; Streptophyta; Embryophyta; Tracheophyta; Spermatophyta; Magnoliopsida; eudicotyledons; Gunneridae; Pentapetalae; rosids; malvids; Brassicales; Brassicaceae; Camelineae; Arabidopsis	0.151623	0.630476	-0.262609	-0.606439	-0.479751	1.15885	1.25196	0.711396	0.954899	0.189779	-0.0841219	0.229244	0.659317	0.00898755	-2.09957	-0.880139	-1.53391
1	Nsylvestris_NODE_11592_length_1920_cov_200	KSG8_ARATH^KSG8_ARATH^Q:304-1701,H:1-464^76.068%ID^E:0^RecName: Full=Shaggy-related protein kinase theta;^Eukaryota; Viridiplantae; Streptophyta; Embryophyta; Tracheophyta; Spermatophyta; Magnoliopsida; eudicotyledons; Gunneridae; Pentapetalae; rosids; malvids; Brassicales; Brassicaceae; Camelineae; Arabidopsis	0.064737	1.10401	0.0178104	0.580949	-0.13212	1.45259	1.2731	1.27658	1.20309	-0.00413078	0.670955	0.975014	0.575558	-0.354321	-3.78059	-2.36916	-2.55408
1	Nsylvestris_NODE_11593_length_1920_cov_171	RBG3_ARATH^RBG3_ARATH^Q:1754-1398,H:1-119^61.345%ID^E:1.75e-40^RecName: Full=Glycine-rich RNA-binding protein 3, mitochondrial;^Eukaryota; Viridiplantae; Streptophyta; Embryophyta; Tracheophyta; Spermatophyta; Magnoliopsida; eudicotyledons; Gunneridae; Pentapetalae; rosids; malvids; Brassicales; Brassicaceae; Camelineae; Arabidopsis	1.31664	2.2666	1.05704	1.26465	-0.613867	1.4083	2.02867	1.6127	0.724627	0.224589	0.472812	0.95706	0.440709	0.607518	-4.11423	-5.06962	-4.58419
1	Nsylvestris_NODE_11596_length_1920_cov_89	CIA1_ARATH^CIA1_ARATH^Q:1092-1553,H:199-351^56.774%ID^E:2.43e-40^RecName: Full=Protein CIA1 {ECO:0000303|PubMed:23104832};^Eukaryota; Viridiplantae; Streptophyta; Embryophyta; Tracheophyta; Spermatophyta; Magnoliopsida; eudicotyledons; Gunneridae; Pentapetalae; rosids; malvids; Brassicales; Brassicaceae; Camelineae; Arabidopsis	0.523236	1.19404	0.336611	0.960672	0.129347	1.64873	1.93261	1.7123	1.9043	1.22841	1.74177	0.718641	1.08051	0.32828	-5.53952	-4.96154	-4.93839
1	Nsylvestris_NODE_11602_length_1919_cov_122	.	0.416384	1.50614	0.481856	0.488243	0.955788	2.49322	1.19525	1.90895	1.3449	0.0841543	0.812441	1.58793	0.136006	1.17457	-4.15755	-5.21414	-5.21414
1	Nsylvestris_NODE_11603_length_1919_cov_25	.	0.280651	-1.04128	0.280651	-0.456314	0.958723	-1.04128	1.12865	0.958723	0.766078	1.41815	-1.04128	0.280651	1.76608	1.86561	-2.04128	-2.04128	-2.04128
1	Nsylvestris_NODE_11606_length_1918_cov_221	CDPK1_ORYSJ^CDPK1_ORYSJ^Q:1730-369,H:54-507^80.396%ID^E:0^RecName: Full=Calcium-dependent protein kinase 1 {ECO:0000305};^Eukaryota; Viridiplantae; Streptophyta; Embryophyta; Tracheophyta; Spermatophyta; Magnoliopsida; Liliopsida; Poales; Poaceae; BOP clade; Oryzoideae; Oryzeae; Oryzinae; Oryza; Oryza sativa	0.876821	1.9373	0.815307	0.725738	0.297738	2.14982	1.73141	1.5291	1.88072	0.368688	1.11345	0.644152	0.706479	0.358714	-6.59502	-4.27021	-4.27021
1	Nsylvestris_NODE_1161_length_4742_cov_191	SKU5_ARATH^SKU5_ARATH^Q:2064-382,H:4-564^78.431%ID^E:0^RecName: Full=Monocopper oxidase-like protein SKU5;^Eukaryota; Viridiplantae; Streptophyta; Embryophyta; Tracheophyta; Spermatophyta; Magnoliopsida; eudicotyledons; Gunneridae; Pentapetalae; rosids; malvids; Brassicales; Brassicaceae; Camelineae; Arabidopsis	-0.247435	0.704598	0.34091	0.95724	0.166468	2.06582	1.61281	1.14482	1.77957	0.719878	0.534486	1.29281	2.06886	0.68665	-4.4392	-4.19858	-5.1897
1	Nsylvestris_NODE_11611_length_1918_cov_23	.	0.389445	0.987086	-0.0129138	-1.01291	-2.59788	2.2601	2.53264	2.10367	0.752621	-0.960962	1.75403	1.20948	0.402124	-0.0129138	-2.59788	-2.59788	-2.59788
1	Nsylvestris_NODE_11612_length_1918_cov_22	.	0.998595	0.883118	0.10551	-0.701845	1.10551	1.88312	2.15614	1.82172	1.38562	0.298155	1.69047	-2.70184	-0.116882	-0.701845	-2.70184	-2.70184	-2.70184
1	Nsylvestris_NODE_11613_length_1917_cov_216	FPG_ARATH^FPG_ARATH^Q:153-1022,H:1-290^76.897%ID^E:2.73e-161^RecName: Full=Formamidopyrimidine-DNA glycosylase;^Eukaryota; Viridiplantae; Streptophyta; Embryophyta; Tracheophyta; Spermatophyta; Magnoliopsida; eudicotyledons; Gunneridae; Pentapetalae; rosids; malvids; Brassicales; Brassicaceae; Camelineae; Arabidopsis	0.618134	1.49486	0.981531	0.901523	0.579741	1.8306	2.49941	2.44847	1.29656	1.08698	0.709343	0.973653	0.491641	0.438944	-6.21553	-3.99265	-6.14321
1	Nsylvestris_NODE_11615_length_1917_cov_201	RK3_TOBAC^RK3_TOBAC^Q:1126-350,H:1-259^100%ID^E:1e-151^RecName: Full=50S ribosomal protein L3, chloroplastic;^Eukaryota; Viridiplantae; Streptophyta; Embryophyta; Tracheophyta; Spermatophyta; Magnoliopsida; eudicotyledons; Gunneridae; Pentapetalae; asterids; lamiids; Solanales; Solanaceae; Nicotianoideae; Nicotianeae; Nicotiana	0.46986	1.49082	0.642146	0.617022	-0.414003	0.581851	0.953884	0.716035	0.693224	0.128317	0.397659	0.020321	-0.0174413	-0.335555	-1.64805	-1.87959	-2.4165
1	Nsylvestris_NODE_11616_length_1917_cov_195	MED27_ARATH^MED27_ARATH^Q:1447-377,H:24-381^65.278%ID^E:1.82e-160^RecName: Full=Mediator of RNA polymerase II transcription subunit 27;^Eukaryota; Viridiplantae; Streptophyta; Embryophyta; Tracheophyta; Spermatophyta; Magnoliopsida; eudicotyledons; Gunneridae; Pentapetalae; rosids; malvids; Brassicales; Brassicaceae; Camelineae; Arabidopsis	0.416275	1.24191	0.512519	-0.0206072	-0.606604	1.20183	1.34663	1.16398	0.691986	-0.985293	1.19853	1.12218	0.726017	0.282826	-3.13461	-2.51095	-2.64663
1	Nsylvestris_NODE_1162_length_4741_cov_165	RUB1_BRANA^RUB1_BRANA^Q:2863-1232,H:1-544^82.904%ID^E:0^RecName: Full=RuBisCO large subunit-binding protein subunit alpha, chloroplastic;^Eukaryota; Viridiplantae; Streptophyta; Embryophyta; Tracheophyta; Spermatophyta; Magnoliopsida; eudicotyledons; Gunneridae; Pentapetalae; rosids; malvids; Brassicales; Brassicaceae; Brassiceae; Brassica	0.727545	1.37164	0.0909251	0.29352	-0.587999	1.94749	1.79348	1.7949	0.598349	-0.205339	0.11677	0.226604	0.266878	0.193928	-3.01541	-2.63923	-2.97405
1	Nsylvestris_NODE_11623_length_1916_cov_198	WRK21_ARATH^WRK21_ARATH^Q:623-1654,H:1-377^54.427%ID^E:2.16e-89^RecName: Full=Probable WRKY transcription factor 21;^Eukaryota; Viridiplantae; Streptophyta; Embryophyta; Tracheophyta; Spermatophyta; Magnoliopsida; eudicotyledons; Gunneridae; Pentapetalae; rosids; malvids; Brassicales; Brassicaceae; Camelineae; Arabidopsis	0.758778	1.32235	0.460946	1.1952	0.52844	1.68428	2.09004	0.880009	1.93928	0.58025	1.66117	0.98204	0.683791	0.791658	-5.18608	-5.18608	-5.18608
1	Nsylvestris_NODE_11627_length_1916_cov_106	ARR3_ARATH^ARR3_ARATH^Q:1050-526,H:1-175^67.778%ID^E:4.15e-68^RecName: Full=Two-component response regulator ARR3;^Eukaryota; Viridiplantae; Streptophyta; Embryophyta; Tracheophyta; Spermatophyta; Magnoliopsida; eudicotyledons; Gunneridae; Pentapetalae; rosids; malvids; Brassicales; Brassicaceae; Camelineae; Arabidopsis	0.980548	1.46764	1.26476	1.1658	-0.0429108	0.833707	1.94527	1.41867	0.884706	-0.0667576	-0.301223	0.155635	-0.0910051	-2.27321	-1.80372	-1.88619	-3.65172
1	Nsylvestris_NODE_11631_length_1915_cov_193	KN8B_ARATH^KN8B_ARATH^Q:369-1913,H:1-509^80.388%ID^E:0^RecName: Full=Kinesin-like protein KIN-8B {ECO:0000305};^Eukaryota; Viridiplantae; Streptophyta; Embryophyta; Tracheophyta; Spermatophyta; Magnoliopsida; eudicotyledons; Gunneridae; Pentapetalae; rosids; malvids; Brassicales; Brassicaceae; Camelineae; Arabidopsis	0.992703	1.64223	0.375032	0.986268	0.292055	2.04306	1.25625	1.47867	1.1827	-0.0852206	0.131135	1.15768	1.45125	0.89405	-4.93021	-4.93021	-3.93744
1	Nsylvestris_NODE_11635_length_1915_cov_17	.	0.403818	1.93089	-0.110755	0.0818899	1.25181	2.16935	1.93987	1.25181	2.40382	0.403818	1.78233	-2.91811	-1.91811	-1.91811	-2.91811	-0.91811	-2.91811
1	Nsylvestris_NODE_11638_length_1914_cov_179	.	-0.0162928	1.29546	0.192527	0.765218	0.8139	2.25404	1.78576	2.14706	1.34297	0.228087	0.683274	1.19514	1.42619	0.618	-5.26953	-4.19228	-5.26953
1	Nsylvestris_NODE_1164_length_4741_cov_69	YG31B_YEAST^YG31B_YEAST^Q:1774-860,H:572-879^45.016%ID^E:4.17e-88^RecName: Full=Transposon Ty3-G Gag-Pol polyprotein;^Eukaryota; Fungi; Dikarya; Ascomycota; Saccharomycotina; Saccharomycetes; Saccharomycetales; Saccharomycetaceae; Saccharomyces`YG31B_YEAST^YG31B_YEAST^Q:830-303,H:890-1092^28.079%ID^E:4.17e-88^RecName: Full=Transposon Ty3-G Gag-Pol polyprotein;^Eukaryota; Fungi; Dikarya; Ascomycot…	1.22361	2.42525	0.259238	-0.0108513	0.393539	1.70904	1.47154	2.2326	1.70904	0.187088	1.42525	0.516396	1.32795	0.425248	-5.09831	-5.09831	-5.09831
1	Nsylvestris_NODE_11641_length_1914_cov_100	.	2.04949	2.21161	2.41206	2.55199	2.0149	0.180108	1.80672	1.01437	0.455224	-0.255364	-0.642387	-0.342827	-0.254515	-1.1729	-3.34283	-4.34283	-4.34283
1	Nsylvestris_NODE_11647_length_1913_cov_34	.	-0.301623	0.565483	0.546374	-0.0385888	0.183804	1.54958	2.1838	1.96141	0.568643	0.183804	1.62438	-0.301623	-1.03859	0.183804	-2.62355	-2.62355	-2.62355
1	Nsylvestris_NODE_11649_length_1913_cov_30	.	0.307367	1.30737	-0.107671	-0.370705	-2.69263	1.21426	1.30737	0.114722	1.62929	0.307367	1.47729	0.892329	0.629295	2.06225	-2.69263	-2.69263	-2.69263
1	Nsylvestris_NODE_11650_length_1913_cov_27	TGT_XENTR^TGT_XENTR^Q:251-1375,H:21-396^57.713%ID^E:1.45e-163^RecName: Full=Queuine tRNA-ribosyltransferase catalytic subunit 1 {ECO:0000255|HAMAP-Rule:MF_03218};^Eukaryota; Metazoa; Chordata; Craniata; Vertebrata; Euteleostomi; Amphibia; Batrachia; Anura; Pipoidea; Pipidae; Xenopodinae; Xenopus; Silurana	0.616438	0.394046	-0.383562	0.599855	0.131011	0.896546	1.39405	1.45294	0.896546	0.132453	-0.383562	0.715974	0.131011	-0.605954	-2.19092	-2.19092	-1.60595
1	Nsylvestris_NODE_11651_length_1912_cov_211	XAT3_ORYSJ^XAT3_ORYSJ^Q:1491-250,H:201-573^35.904%ID^E:6.91e-81^RecName: Full=Alpha-1,3-arabinosyltransferase XAT3 {ECO:0000305};^Eukaryota; Viridiplantae; Streptophyta; Embryophyta; Tracheophyta; Spermatophyta; Magnoliopsida; Liliopsida; Poales; Poaceae; BOP clade; Oryzoideae; Oryzeae; Oryzinae; Oryza; Oryza sativa	0.247384	0.563069	0.866646	0.653158	-0.580813	1.73399	1.24916	1.03593	0.368533	-1.53877	0.0369572	-1.22793	0.372211	-0.671291	-1.0006	-0.486766	-1.62087
1	Nsylvestris_NODE_11653_length_1912_cov_199	PBL7_ARATH^PBL7_ARATH^Q:731-1600,H:58-347^51.195%ID^E:1.05e-89^RecName: Full=Probable serine/threonine-protein kinase PBL7 {ECO:0000305};^Eukaryota; Viridiplantae; Streptophyta; Embryophyta; Tracheophyta; Spermatophyta; Magnoliopsida; eudicotyledons; Gunneridae; Pentapetalae; rosids; malvids; Brassicales; Brassicaceae; Camelineae; Arabidopsis	-0.242123	1.03226	0.771604	0.570878	-0.293821	0.810975	1.0735	1.29771	1.17345	0.0659725	0.0813933	0.503979	0.656281	-0.261446	-2.3377	-2.39533	-2.50759
1	Nsylvestris_NODE_11655_length_1912_cov_122	RHO1_PEA^RHO1_PEA^Q:1293-934,H:1-120^99.167%ID^E:4.99e-78^RecName: Full=Rac-like GTP-binding protein RHO1;^Eukaryota; Viridiplantae; Streptophyta; Embryophyta; Tracheophyta; Spermatophyta; Magnoliopsida; eudicotyledons; Gunneridae; Pentapetalae; rosids; fabids; Fabales; Fabaceae; Papilionoideae; 50 kb inversion clade; NPAAA clade; Hologalegina; IRL clade; Fabeae; Pisum	-0.184461	0.698893	-0.31583	0.052174	-0.726336	1.11353	1.1985	0.952888	0.526304	-0.326063	0.385647	0.138523	0.714594	-0.217592	-1.13201	-1.50398	-1.37478
1	Nsylvestris_NODE_11659_length_1911_cov_32	DOT3_ARATH^DOT3_ARATH^Q:800-1804,H:21-356^51.917%ID^E:1.81e-114^RecName: Full=BTB/POZ domain-containing protein DOT3;^Eukaryota; Viridiplantae; Streptophyta; Embryophyta; Tracheophyta; Spermatophyta; Magnoliopsida; eudicotyledons; Gunneridae; Pentapetalae; rosids; malvids; Brassicales; Brassicaceae; Camelineae; Arabidopsis	0.768292	1.11622	0.116215	-1.10618	0.893823	1.63079	1.21575	1.30886	0.116215	-1.69114	-0.106177	-1.10618	-0.369211	0.116215	-1.69114	0.478785	-1.69114
1	Nsylvestris_NODE_11665_length_1910_cov_104	.	0.0108219	1.135	-0.485936	1.12671	-0.255458	0.98018	1.00902	1.61388	0.297378	0.759626	0.585139	-0.280955	0.0227796	-0.395636	-2.03245	-1.51417	-2.57594
1	Nsylvestris_NODE_11666_length_1910_cov_91	Y5371_ARATH^Y5371_ARATH^Q:128-1825,H:46-589^68.541%ID^E:0^RecName: Full=Probable LRR receptor-like serine/threonine-protein kinase At5g63710;^Eukaryota; Viridiplantae; Streptophyta; Embryophyta; Tracheophyta; Spermatophyta; Magnoliopsida; eudicotyledons; Gunneridae; Pentapetalae; rosids; malvids; Brassicales; Brassicaceae; Camelineae; Arabidopsis	0.522549	1.12861	0.151282	0.594707	0.738155	0.808922	0.869693	0.716558	0.446591	-1.27749	-0.366887	-0.229039	0.679726	0.0403921	-2.18438	-1.45277	-1.18661
1	Nsylvestris_NODE_11668_length_1909_cov_22	PPR58_ARATH^PPR58_ARATH^Q:857-1375,H:451-623^64.74%ID^E:6.42e-70^RecName: Full=Pentatricopeptide repeat-containing protein At1g26460, mitochondrial;^Eukaryota; Viridiplantae; Streptophyta; Embryophyta; Tracheophyta; Spermatophyta; Magnoliopsida; eudicotyledons; Gunneridae; Pentapetalae; rosids; malvids; Brassicales; Brassicaceae; Camelineae; Arabidopsis`PPR58_ARATH^PPR58_ARATH^Q:197-736,H:96-268^…	-0.212168	-0.0195231	-0.0195231	-3.01952	-3.01952	3.18993	3.06794	2.40674	2.06794	2.26588	2.10976	-0.697595	-0.212168	-1.43456	-1.43456	-2.01952	-3.01952
1	Nsylvestris_NODE_11669_length_1910_cov_15	FH20_ARATH^FH20_ARATH^Q:1908-370,H:76-596^59.429%ID^E:0^RecName: Full=Formin-like protein 20;^Eukaryota; Viridiplantae; Streptophyta; Embryophyta; Tracheophyta; Spermatophyta; Magnoliopsida; eudicotyledons; Gunneridae; Pentapetalae; rosids; malvids; Brassicales; Brassicaceae; Camelineae; Arabidopsis	0.0762354	1.95182	0.124676	-1.29491	1.12977	1.49347	1.2855	1.26943	2.0487	-0.156161	0.166593	-0.160301	0.149972	0.79336	-2.95939	-2.95939	-2.95939
1	Nsylvestris_NODE_1167_length_4736_cov_26	LORF2_HUMAN^LORF2_HUMAN^Q:2879-3544,H:464-686^33.04%ID^E:4.79e-29^RecName: Full=LINE-1 retrotransposable element ORF2 protein;^Eukaryota; Metazoa; Chordata; Craniata; Vertebrata; Euteleostomi; Mammalia; Eutheria; Euarchontoglires; Primates; Haplorrhini; Catarrhini; Hominidae; Homo`LORF2_HUMAN^LORF2_HUMAN^Q:3597-3947,H:700-818^27.731%ID^E:4.79e-29^RecName: Full=LINE-1 retrotransposable element ORF…	0.293014	1.71928	0.816576	-0.706986	0.380477	2.151	1.78487	1.41112	1.46294	-2.70699	-0.385058	-0.247554	0.877977	-0.122023	-2.12202	-0.899631	-3.70699
1	Nsylvestris_NODE_11673_length_1909_cov_117	CCR4E_ARATH^CCR4E_ARATH^Q:1519-440,H:76-451^56.728%ID^E:1.01e-148^RecName: Full=Carbon catabolite repressor protein 4 homolog 5;^Eukaryota; Viridiplantae; Streptophyta; Embryophyta; Tracheophyta; Spermatophyta; Magnoliopsida; eudicotyledons; Gunneridae; Pentapetalae; rosids; malvids; Brassicales; Brassicaceae; Camelineae; Arabidopsis	-0.108638	0.674015	0.0506649	0.31209	-0.492272	0.673286	1.23419	0.889104	0.533813	0.0412075	0.577774	0.389728	0.0576058	-0.549981	-1.4877	-1.18692	-1.60797
1	Nsylvestris_NODE_11677_length_1908_cov_154	ENT3_ARATH^ENT3_ARATH^Q:392-1630,H:6-414^70.531%ID^E:0^RecName: Full=Equilibrative nucleotide transporter 3;^Eukaryota; Viridiplantae; Streptophyta; Embryophyta; Tracheophyta; Spermatophyta; Magnoliopsida; eudicotyledons; Gunneridae; Pentapetalae; rosids; malvids; Brassicales; Brassicaceae; Camelineae; Arabidopsis	0.939248	1.74492	0.956863	1.36608	-0.977229	1.79076	2.13099	1.78307	1.43693	0.813754	0.953851	-0.0364495	0.131477	0.619706	-4.74235	-4.74235	-4.16928
1	Nsylvestris_NODE_1168_length_4733_cov_69	UBC28_ARATH^UBC28_ARATH^Q:4518-4075,H:1-148^97.297%ID^E:8.04e-94^RecName: Full=Ubiquitin-conjugating enzyme E2 28;^Eukaryota; Viridiplantae; Streptophyta; Embryophyta; Tracheophyta; Spermatophyta; Magnoliopsida; eudicotyledons; Gunneridae; Pentapetalae; rosids; malvids; Brassicales; Brassicaceae; Camelineae; Arabidopsis	0.140745	0.923033	0.0249529	0.524038	-1.0792	0.527981	1.11674	0.833964	0.640714	-0.0176112	0.650167	0.114734	-0.0329904	0.10767	-1.33631	-1.80635	-1.33228
1	Nsylvestris_NODE_11682_length_1907_cov_199	JAR6_NICAT^JAR6_NICAT^Q:1830-91,H:1-580^96.724%ID^E:0^RecName: Full=Jasmonoyl--L-amino acid synthetase JAR6 {ECO:0000305};^Eukaryota; Viridiplantae; Streptophyta; Embryophyta; Tracheophyta; Spermatophyta; Magnoliopsida; eudicotyledons; Gunneridae; Pentapetalae; asterids; lamiids; Solanales; Solanaceae; Nicotianoideae; Nicotianeae; Nicotiana	0.594805	1.22215	0.364778	1.51474	0.15699	1.91279	2.39663	2.4593	0.230776	-1.8335	-0.085845	-0.688048	-0.17005	-0.868581	-2.81143	-1.89359	-2.50192
1	Nsylvestris_NODE_11687_length_1907_cov_132	REM19_ARATH^REM19_ARATH^Q:1756-1355,H:86-220^33.094%ID^E:2.49e-14^RecName: Full=B3 domain-containing protein REM19;^Eukaryota; Viridiplantae; Streptophyta; Embryophyta; Tracheophyta; Spermatophyta; Magnoliopsida; eudicotyledons; Gunneridae; Pentapetalae; rosids; malvids; Brassicales; Brassicaceae; Camelineae; Arabidopsis`REM19_ARATH^REM19_ARATH^Q:1291-956,H:115-226^31.858%ID^E:2.26e-08^RecName: F…	0.290376	1.44765	0.409982	0.31338	0.207354	-0.462096	-0.329248	-0.0575378	2.06129	0.995927	1.80953	0.85102	1.27873	0.514492	-2.27495	-4.01889	-3.03701
1	Nsylvestris_NODE_1169_length_4730_cov_53	IRE_ARATH^IRE_ARATH^Q:428-3787,H:30-1153^63.613%ID^E:0^RecName: Full=Probable serine/threonine protein kinase IRE {ECO:0000305};^Eukaryota; Viridiplantae; Streptophyta; Embryophyta; Tracheophyta; Spermatophyta; Magnoliopsida; eudicotyledons; Gunneridae; Pentapetalae; rosids; malvids; Brassicales; Brassicaceae; Camelineae; Arabidopsis	0.907605	1.56757	-0.404235	-0.224211	0.904603	1.81149	2.28542	0.729031	0.515382	-0.504436	0.913592	-0.300115	0.416619	0.617015	-2.51847	-3.35843	-3.35843
1	Nsylvestris_NODE_11691_length_1906_cov_192	STOP1_ARATH^STOP1_ARATH^Q:289-1740,H:29-499^55.936%ID^E:4.03e-164^RecName: Full=Protein SENSITIVE TO PROTON RHIZOTOXICITY 1 {ECO:0000303|PubMed:17535918};^Eukaryota; Viridiplantae; Streptophyta; Embryophyta; Tracheophyta; Spermatophyta; Magnoliopsida; eudicotyledons; Gunneridae; Pentapetalae; rosids; malvids; Brassicales; Brassicaceae; Camelineae; Arabidopsis	0.561153	1.82981	0.600924	0.997368	-0.136273	1.69543	1.61923	2.05491	1.1185	0.690972	0.757002	0.719537	0.536816	1.11086	-4.30142	-5.20683	-4.64799
1	Nsylvestris_NODE_11693_length_1906_cov_70	U87A2_ARATH^U87A2_ARATH^Q:1808-465,H:8-451^50.998%ID^E:6.76e-161^RecName: Full=UDP-glycosyltransferase 87A2;^Eukaryota; Viridiplantae; Streptophyta; Embryophyta; Tracheophyta; Spermatophyta; Magnoliopsida; eudicotyledons; Gunneridae; Pentapetalae; rosids; malvids; Brassicales; Brassicaceae; Camelineae; Arabidopsis	1.10105	2.25955	0.165751	0.267996	0.843572	1.39765	1.49119	1.36566	1.42749	-0.0343018	1.3516	1.22864	0.49119	0.679169	-4.67873	-4.67873	-4.67873
1	Nsylvestris_NODE_11694_length_1905_cov_226	ASOL_TOBAC^ASOL_TOBAC^Q:1657-47,H:21-553^84.171%ID^E:0^RecName: Full=L-ascorbate oxidase homolog;^Eukaryota; Viridiplantae; Streptophyta; Embryophyta; Tracheophyta; Spermatophyta; Magnoliopsida; eudicotyledons; Gunneridae; Pentapetalae; asterids; lamiids; Solanales; Solanaceae; Nicotianoideae; Nicotianeae; Nicotiana	1.33457	4.54664	1.80248	-0.614173	1.90646	0.577243	-6.2117	-0.680011	2.2112	-2.01164	1.07074	1.74261	-0.086549	-0.39127	-0.57392	-3.94267	-0.680011
1	Nsylvestris_NODE_11697_length_1905_cov_208	ODP24_ARATH^ODP24_ARATH^Q:1590-325,H:51-480^75.174%ID^E:0^RecName: Full=Dihydrolipoyllysine-residue acetyltransferase component 4 of pyruvate dehydrogenase complex, chloroplastic;^Eukaryota; Viridiplantae; Streptophyta; Embryophyta; Tracheophyta; Spermatophyta; Magnoliopsida; eudicotyledons; Gunneridae; Pentapetalae; rosids; malvids; Brassicales; Brassicaceae; Camelineae; Arabidopsis	0.521968	0.932143	0.633028	0.512237	-0.522453	1.14575	0.963288	1.42781	0.113072	-0.532953	0.157553	0.0134919	0.102555	-0.112215	-1.91712	-1.85446	-1.5837
1	Nsylvestris_NODE_11698_length_1905_cov_202	ADT1_SOLTU^ADT1_SOLTU^Q:157-1269,H:7-386^79.737%ID^E:0^RecName: Full=ADP,ATP carrier protein, mitochondrial;^Eukaryota; Viridiplantae; Streptophyta; Embryophyta; Tracheophyta; Spermatophyta; Magnoliopsida; eudicotyledons; Gunneridae; Pentapetalae; asterids; lamiids; Solanales; Solanaceae; Solanoideae; Solaneae; Solanum	-0.118224	0.491706	1.46193	1.32972	-2.12183	2.87727	2.5775	2.94813	-2.12183	-2.12183	1.64477	0.463137	-1.12183	0.176833	-2.12183	-2.12183	-2.12183
1	Nsylvestris_NODE_11699_length_1905_cov_175	FLOT1_MEDTR^FLOT1_MEDTR^Q:131-1552,H:2-470^65.263%ID^E:0^RecName: Full=Flotillin-like protein 1;^Eukaryota; Viridiplantae; Streptophyta; Embryophyta; Tracheophyta; Spermatophyta; Magnoliopsida; eudicotyledons; Gunneridae; Pentapetalae; rosids; fabids; Fabales; Fabaceae; Papilionoideae; 50 kb inversion clade; NPAAA clade; Hologalegina; IRL clade; Trifolieae; Medicago	0.360047	1.53251	0.42088	0.43551	0.369718	2.05767	2.34542	1.78716	1.03265	0.380559	0.460396	0.933697	0.358324	0.941353	-5.07548	-3.9773	-4.36311
1	Nsylvestris_NODE_11700_length_1905_cov_129	3AT1_ARATH^3AT1_ARATH^Q:115-1494,H:6-467^36.306%ID^E:2.94e-88^RecName: Full=Coumaroyl-CoA:anthocyanidin 3-O-glucoside-6''-O-coumaroyltransferase 1;^Eukaryota; Viridiplantae; Streptophyta; Embryophyta; Tracheophyta; Spermatophyta; Magnoliopsida; eudicotyledons; Gunneridae; Pentapetalae; rosids; malvids; Brassicales; Brassicaceae; Camelineae; Arabidopsis	1.2779	2.05206	0.655144	0.670334	0.356624	1.16032	1.96417	1.20841	1.10803	0.0325603	1.25518	0.793057	0.831955	0.801235	-4.72233	-4.72233	-4.72233
1	Nsylvestris_NODE_11703_length_1904_cov_194	PGLR_VITVI^PGLR_VITVI^Q:1645-395,H:40-466^48.712%ID^E:4.27e-144^RecName: Full=Probable polygalacturonase;^Eukaryota; Viridiplantae; Streptophyta; Embryophyta; Tracheophyta; Spermatophyta; Magnoliopsida; eudicotyledons; Gunneridae; Pentapetalae; rosids; Vitales; Vitaceae; Viteae; Vitis	0.962137	1.96238	0.866088	0.919136	-0.0963487	1.84861	1.46823	1.79205	1.38545	0.243273	1.07187	0.974121	0.639247	0.349145	-5.78842	-4.17262	-4.42436
1	Nsylvestris_NODE_11708_length_1904_cov_52	POLX_TOBAC^POLX_TOBAC^Q:383-159,H:321-395^36%ID^E:3.72e-14^RecName: Full=Retrovirus-related Pol polyprotein from transposon TNT 1-94;^Eukaryota; Viridiplantae; Streptophyta; Embryophyta; Tracheophyta; Spermatophyta; Magnoliopsida; eudicotyledons; Gunneridae; Pentapetalae; asterids; lamiids; Solanales; Solanaceae; Nicotianoideae; Nicotianeae; Nicotiana`POLX_TOBAC^POLX_TOBAC^Q:679-425,H:214-307^32.…	-0.635336	1.86716	-1.2203	0.860359	0.587056	2.58706	1.10163	1.58706	1.36466	-2.2203	-0.630535	-1.2203	-1.2203	0.104512	-0.0567997	-0.635336	-2.2203
1	Nsylvestris_NODE_11709_length_1903_cov_237	ASOL_TOBAC^ASOL_TOBAC^Q:187-1848,H:1-554^97.112%ID^E:0^RecName: Full=L-ascorbate oxidase homolog;^Eukaryota; Viridiplantae; Streptophyta; Embryophyta; Tracheophyta; Spermatophyta; Magnoliopsida; eudicotyledons; Gunneridae; Pentapetalae; asterids; lamiids; Solanales; Solanaceae; Nicotianoideae; Nicotianeae; Nicotiana	1.82823	4.69847	1.93692	-0.104951	2.26339	0.276231	-5.05011	-0.544262	1.62067	-2.59492	0.978686	1.29673	0.156446	-0.759944	-0.829133	-3.20211	-1.97033
1	Nsylvestris_NODE_11710_length_1903_cov_228	BRT1_ARATH^BRT1_ARATH^Q:445-1635,H:1-391^69.521%ID^E:9.05e-172^RecName: Full=Adenine nucleotide transporter BT1, chloroplastic/mitochondrial;^Eukaryota; Viridiplantae; Streptophyta; Embryophyta; Tracheophyta; Spermatophyta; Magnoliopsida; eudicotyledons; Gunneridae; Pentapetalae; rosids; malvids; Brassicales; Brassicaceae; Camelineae; Arabidopsis	1.03878	1.84898	0.464178	1.18919	0.169151	1.53935	1.73691	1.64555	1.39649	0.668376	1.06897	0.857799	0.600927	0.472114	-6.21938	-4.96339	-3.51399
1	Nsylvestris_NODE_11715_length_1903_cov_124	AMI4G_ARATH^AMI4G_ARATH^Q:1652-222,H:37-508^60.46%ID^E:0^RecName: Full=Probable amidase At4g34880 {ECO:0000305};^Eukaryota; Viridiplantae; Streptophyta; Embryophyta; Tracheophyta; Spermatophyta; Magnoliopsida; eudicotyledons; Gunneridae; Pentapetalae; rosids; malvids; Brassicales; Brassicaceae; Camelineae; Arabidopsis	-0.253019	-0.286712	0.136499	0.730232	0.970498	2.47502	2.36752	1.83332	-0.187906	-0.701056	-0.737938	-0.0927019	0.257965	-0.301622	-2.35274	-1.91366	-1.9437
1	Nsylvestris_NODE_11716_length_1903_cov_123	.	1.24746	2.11914	0.95164	1.44997	1.38942	-0.0999125	-0.31346	-1.38865	1.05557	-0.818752	-0.128551	1.39083	2.0334	1.37785	-2.95429	-3.94354	-3.36813
1	Nsylvestris_NODE_11722_length_1902_cov_176	EHD2_ARATH^EHD2_ARATH^Q:1790-189,H:14-545^74.579%ID^E:0^RecName: Full=EH domain-containing protein 2 {ECO:0000303|PubMed:18547399};^Eukaryota; Viridiplantae; Streptophyta; Embryophyta; Tracheophyta; Spermatophyta; Magnoliopsida; eudicotyledons; Gunneridae; Pentapetalae; rosids; malvids; Brassicales; Brassicaceae; Camelineae; Arabidopsis	0.315221	1.43597	0.289099	-1.7976	0.739191	2.60798	1.85261	1.8845	1.32761	-1.0771	0.628961	0.22589	0.868305	1.32465	-3.54176	-3.54176	-3.54176
1	Nsylvestris_NODE_11725_length_1902_cov_83	M3K17_ARATH^M3K17_ARATH^Q:107-955,H:1-284^50%ID^E:1.32e-89^RecName: Full=Mitogen-activated protein kinase kinase kinase 17 {ECO:0000303|PubMed:25720833};^Eukaryota; Viridiplantae; Streptophyta; Embryophyta; Tracheophyta; Spermatophyta; Magnoliopsida; eudicotyledons; Gunneridae; Pentapetalae; rosids; malvids; Brassicales; Brassicaceae; Camelineae; Arabidopsis`M3K17_ARATH^M3K17_ARATH^Q:1796-948,H:1…	0.754063	1.27078	0.519102	1.04329	-0.895935	0.161804	1.37708	1.37708	0.519102	-0.475498	0.909357	0.216209	0.689027	-0.0227782	-2.4809	-3.4809	-1.4809
1	Nsylvestris_NODE_11729_length_1901_cov_72	PP356_ARATH^PP356_ARATH^Q:1003-260,H:60-300^57.143%ID^E:1.1e-86^RecName: Full=Pentatricopeptide repeat-containing protein At4g38150;^Eukaryota; Viridiplantae; Streptophyta; Embryophyta; Tracheophyta; Spermatophyta; Magnoliopsida; eudicotyledons; Gunneridae; Pentapetalae; rosids; malvids; Brassicales; Brassicaceae; Camelineae; Arabidopsis	0.156429	1.17674	-0.0236162	-0.0491879	0.0242262	1.17104	1.38356	1.45641	0.553902	-0.475037	0.303066	-0.348748	0.262068	0.304494	-1.78859	-2.2695	-1.83726
1	Nsylvestris_NODE_1173_length_4727_cov_157	GLGL3_SOLTU^GLGL3_SOLTU^Q:296-1738,H:1-483^92.133%ID^E:0^RecName: Full=Glucose-1-phosphate adenylyltransferase large subunit 3, chloroplastic/amyloplastic;^Eukaryota; Viridiplantae; Streptophyta; Embryophyta; Tracheophyta; Spermatophyta; Magnoliopsida; eudicotyledons; Gunneridae; Pentapetalae; asterids; lamiids; Solanales; Solanaceae; Solanoideae; Solaneae; Solanum	-0.34417	0.714443	0.0741228	-0.706709	-0.491215	0.93235	1.209	0.891061	0.113427	-0.915177	0.0294955	0.181296	0.522068	0.607479	-1.19425	-0.419856	-1.20336
1	Nsylvestris_NODE_11730_length_1901_cov_67	OTU7_ARATH^OTU7_ARATH^Q:140-1243,H:17-375^56.098%ID^E:1.45e-121^RecName: Full=OVARIAN TUMOR DOMAIN-containing deubiquitinating enzyme 7 {ECO:0000303|PubMed:24659992};^Eukaryota; Viridiplantae; Streptophyta; Embryophyta; Tracheophyta; Spermatophyta; Magnoliopsida; eudicotyledons; Gunneridae; Pentapetalae; rosids; malvids; Brassicales; Brassicaceae; Camelineae; Arabidopsis	-0.0991691	1.12857	-0.487859	0.0514334	-0.686643	0.719536	0.935024	0.605207	1.11929	-0.075331	0.596264	-0.2629	0.0332348	-0.0698854	-1.06678	-0.375791	-2.0642
1	Nsylvestris_NODE_11731_length_1901_cov_43	.	-0.355115	0.111043	0.0527266	0.904725	0.753166	1.57629	2.29342	0.637689	0.866251	0.216225	0.652044	0.222652	0.629249	-0.636933	-2.02889	-2.94727	-2.94727
1	Nsylvestris_NODE_11734_length_1900_cov_230	ISS1_ARATH^ISS1_ARATH^Q:453-1631,H:1-393^67.939%ID^E:0^RecName: Full=Aromatic aminotransferase ISS1 {ECO:0000303|PubMed:26163189};^Eukaryota; Viridiplantae; Streptophyta; Embryophyta; Tracheophyta; Spermatophyta; Magnoliopsida; eudicotyledons; Gunneridae; Pentapetalae; rosids; malvids; Brassicales; Brassicaceae; Camelineae; Arabidopsis	-0.0483285	0.731803	0.298912	0.743654	-0.236741	0.713527	0.906309	0.848158	0.517607	-0.0339293	0.290983	-0.011211	-0.0699726	-0.435058	-1.17477	-1.58264	-1.4583
1	Nsylvestris_NODE_1174_length_4725_cov_140	NUP1_ARATH^NUP1_ARATH^Q:4577-2856,H:22-583^34.861%ID^E:1.58e-71^RecName: Full=Nuclear pore complex protein NUP1 {ECO:0000303|PubMed:19843313};^Eukaryota; Viridiplantae; Streptophyta; Embryophyta; Tracheophyta; Spermatophyta; Magnoliopsida; eudicotyledons; Gunneridae; Pentapetalae; rosids; malvids; Brassicales; Brassicaceae; Camelineae; Arabidopsis	1.04728	2.22706	0.89639	0.0889863	0.175706	1.84217	1.87657	1.63031	1.28204	0.209049	1.21391	0.50001	1.16183	0.832419	-5.31326	-5.31326	-4.3572
1	Nsylvestris_NODE_11740_length_1900_cov_184	PER72_ARATH^PER72_ARATH^Q:121-1110,H:1-333^74.775%ID^E:1.48e-154^RecName: Full=Peroxidase 72;^Eukaryota; Viridiplantae; Streptophyta; Embryophyta; Tracheophyta; Spermatophyta; Magnoliopsida; eudicotyledons; Gunneridae; Pentapetalae; rosids; malvids; Brassicales; Brassicaceae; Camelineae; Arabidopsis	-0.0294018	-0.419348	-0.113831	0.5809	0.504293	1.58065	1.92234	1.33694	4.16096	2.49086	3.45372	-0.335284	0.932124	-0.232935	-5.27733	-5.27733	-5.27733
1	Nsylvestris_NODE_11742_length_1900_cov_170	MS5L2_ARATH^MS5L2_ARATH^Q:225-1589,H:6-427^67.904%ID^E:0^RecName: Full=Protein POLLENLESS 3-LIKE 2 {ECO:0000303|Ref.5};^Eukaryota; Viridiplantae; Streptophyta; Embryophyta; Tracheophyta; Spermatophyta; Magnoliopsida; eudicotyledons; Gunneridae; Pentapetalae; rosids; malvids; Brassicales; Brassicaceae; Camelineae; Arabidopsis	-0.163435	0.956361	-0.0480558	0.195581	0.695383	1.40288	0.82018	0.866599	0.801644	-0.767046	0.786179	0.0416951	0.0466747	-1.23414	-1.64963	-1.16599	-1.58488
1	Nsylvestris_NODE_11747_length_1900_cov_44	.	-0.34352	0.957649	-0.150875	-1.15088	-0.34352	2.27539	1.97841	1.34738	0.147783	0.298026	0.434087	1.01905	0.549564	-0.150875	-3.15088	-1.56591	-2.15088
1	Nsylvestris_NODE_11748_length_1900_cov_18	.	0.0541632	1.80928	-0.775686	1.03064	0.809276	1.1312	1.92475	0.546242	1.36999	-0.453758	1.1312	0.394239	-0.190724	-0.453758	-2.77569	-2.77569	-2.77569
1	Nsylvestris_NODE_11749_length_1900_cov_12	METE3_ARATH^METE3_ARATH^Q:544-413,H:97-140^52.273%ID^E:9.43e-06^RecName: Full=5-methyltetrahydropteroyltriglutamate--homocysteine methyltransferase 3, chloroplastic;^Eukaryota; Viridiplantae; Streptophyta; Embryophyta; Tracheophyta; Spermatophyta; Magnoliopsida; eudicotyledons; Gunneridae; Pentapetalae; rosids; malvids; Brassicales; Brassicaceae; Camelineae; Arabidopsis	-0.57425	1.92825	0.648142	0.42575	0.0107123	2.01071	1.74768	1.01071	1.42575	-1.15921	0.648142	0.840787	1.08871	-0.57425	-3.15921	-3.15921	-3.15921
1	Nsylvestris_NODE_11750_length_1899_cov_184	.	0.766722	0.879197	-0.0164665	0.842671	-0.233278	2.37105	2.65003	1.39016	2.47016	0.983533	2.55727	0.579637	0.623358	0.464159	-5.44273	-5.44273	-5.44273
1	Nsylvestris_NODE_11756_length_1899_cov_15	.	-0.684032	1.62534	0.0871498	-0.684032	2.05149	1.87015	2.48589	0.900931	0.910517	-1.26899	1.14243	-0.684032	-0.261799	-0.684032	-2.26899	-2.26899	-2.26899
1	Nsylvestris_NODE_1176_length_4726_cov_217	AVT6C_ARATH^AVT6C_ARATH^Q:1460-189,H:9-435^59.579%ID^E:5.1e-139^RecName: Full=Amino acid transporter AVT6C {ECO:0000305};^Eukaryota; Viridiplantae; Streptophyta; Embryophyta; Tracheophyta; Spermatophyta; Magnoliopsida; eudicotyledons; Gunneridae; Pentapetalae; rosids; malvids; Brassicales; Brassicaceae; Camelineae; Arabidopsis	1.98606	2.85524	1.05946	1.6328	1.15051	-1.39514	-1.49135	-2.17941	2.10567	0.972595	1.82109	1.2281	1.6276	1.54548	-5.34933	-4.02741	-3.54198
1	Nsylvestris_NODE_11761_length_1898_cov_137	GUAA_HELHP^GUAA_HELHP^Q:955-395,H:781-970^47.895%ID^E:5.45e-47^RecName: Full=Probable GMP synthase [glutamine-hydrolyzing];^Bacteria; Proteobacteria; Epsilonproteobacteria; Campylobacterales; Helicobacteraceae; Helicobacter	0.581747	1.52147	0.999355	0.619997	0.557137	1.98376	1.9496	1.39157	1.24608	-0.1284	0.428218	1.21487	1.14571	1.26954	-6.24506	-3.9641	-4.5715
1	Nsylvestris_NODE_11762_length_1898_cov_39	GPAT5_ARATH^GPAT5_ARATH^Q:196-1641,H:13-497^70.37%ID^E:0^RecName: Full=Glycerol-3-phosphate acyltransferase 5;^Eukaryota; Viridiplantae; Streptophyta; Embryophyta; Tracheophyta; Spermatophyta; Magnoliopsida; eudicotyledons; Gunneridae; Pentapetalae; rosids; malvids; Brassicales; Brassicaceae; Camelineae; Arabidopsis	-0.967579	-0.382616	-1.96758	-1.96758	-1.96758	4.8904	4.50815	4.54022	-0.967579	-1.96758	0.0324212	-0.967579	1.35435	1.73286	-1.96758	-1.96758	-1.96758
1	Nsylvestris_NODE_11764_length_1898_cov_9	INV1_DAUCA^INV1_DAUCA^Q:1864-149,H:18-592^70.884%ID^E:0^RecName: Full=Beta-fructofuranosidase, insoluble isoenzyme 1;^Eukaryota; Viridiplantae; Streptophyta; Embryophyta; Tracheophyta; Spermatophyta; Magnoliopsida; eudicotyledons; Gunneridae; Pentapetalae; asterids; campanulids; Apiales; Apiaceae; Apioideae; Scandiceae; Daucinae; Daucus; Daucus sect. Daucus	-1.48241	0.102554	0.102554	1.10255	-0.482408	2.83952	3.47179	3.51759	-1.48241	-1.48241	1.10255	0.102554	-1.48241	-1.48241	-1.48241	-1.48241	-1.48241
1	Nsylvestris_NODE_11769_length_1897_cov_148	ORC2_ARATH^ORC2_ARATH^Q:1536-487,H:12-361^66.097%ID^E:2.49e-171^RecName: Full=Origin of replication complex subunit 2 {ECO:0000303|PubMed:16179646};^Eukaryota; Viridiplantae; Streptophyta; Embryophyta; Tracheophyta; Spermatophyta; Magnoliopsida; eudicotyledons; Gunneridae; Pentapetalae; rosids; malvids; Brassicales; Brassicaceae; Camelineae; Arabidopsis	0.00258305	0.660765	0.279039	0.345529	-0.886834	2.64365	2.53741	1.65067	1.25544	0.341948	1.06655	0.413077	1.16442	1.27998	-4.25141	-4.25141	-4.25141
1	Nsylvestris_NODE_11771_length_1897_cov_73	.	-0.913952	-0.73338	0.0371385	1.13335	0.0860481	1.13335	0.934045	1.22355	2.53671	1.58855	2.2981	1.63859	1.99934	1.50109	-4.82084	-4.82084	-4.82084
1	Nsylvestris_NODE_11774_length_1896_cov_226	PME28_ARATH^PME28_ARATH^Q:293-1822,H:49-558^54.475%ID^E:0^RecName: Full=Putative pectinesterase/pectinesterase inhibitor 28;^Eukaryota; Viridiplantae; Streptophyta; Embryophyta; Tracheophyta; Spermatophyta; Magnoliopsida; eudicotyledons; Gunneridae; Pentapetalae; rosids; malvids; Brassicales; Brassicaceae; Camelineae; Arabidopsis	1.02361	4.53449	1.10901	-1.08193	2.63535	0.383559	-2.62543	-0.211295	1.0282	-2.04047	0.404023	1.82016	0.544495	-1.37447	-0.697534	-2.82634	-2.62543
1	Nsylvestris_NODE_11775_length_1896_cov_217	GDI2_ARATH^GDI2_ARATH^Q:205-1509,H:1-435^84.368%ID^E:0^RecName: Full=Guanosine nucleotide diphosphate dissociation inhibitor 2;^Eukaryota; Viridiplantae; Streptophyta; Embryophyta; Tracheophyta; Spermatophyta; Magnoliopsida; eudicotyledons; Gunneridae; Pentapetalae; rosids; malvids; Brassicales; Brassicaceae; Camelineae; Arabidopsis	0.205946	0.803027	0.267723	0.806168	0.249504	1.45325	1.27891	0.715076	0.983565	-0.388906	0.404028	0.206546	1.02976	0.362459	-2.6164	-2.89798	-2.86268
1	Nsylvestris_NODE_11777_length_1896_cov_149	SPS1_ORYSJ^SPS1_ORYSJ^Q:1896-1567,H:321-430^76.364%ID^E:6.5e-50^RecName: Full=Solanesyl-diphosphate synthase 1, mitochondrial {ECO:0000303|PubMed:20421194};^Eukaryota; Viridiplantae; Streptophyta; Embryophyta; Tracheophyta; Spermatophyta; Magnoliopsida; Liliopsida; Poales; Poaceae; BOP clade; Oryzoideae; Oryzeae; Oryzinae; Oryza; Oryza sativa`SPS1_ORYSJ^SPS1_ORYSJ^Q:821-1096,H:339-430^73.913%ID^E…	0.457274	0.843683	-0.0130791	0.149919	0.357934	1.11274	1.60074	1.25804	0.657106	0.138267	0.47965	0.0939508	0.461167	-0.24509	-1.47551	-2.4133	-3.46349
1	Nsylvestris_NODE_1178_length_4723_cov_218	P4KB1_ARATH^P4KB1_ARATH^Q:4158-748,H:1-1121^67.561%ID^E:0^RecName: Full=Phosphatidylinositol 4-kinase beta 1;^Eukaryota; Viridiplantae; Streptophyta; Embryophyta; Tracheophyta; Spermatophyta; Magnoliopsida; eudicotyledons; Gunneridae; Pentapetalae; rosids; malvids; Brassicales; Brassicaceae; Camelineae; Arabidopsis	-0.141793	1.05004	-0.508413	-0.178869	-0.753539	1.04437	1.07792	1.1864	0.946772	-0.080077	0.463787	0.289922	0.478987	-0.20715	-1.9178	-1.46545	-1.28511
1	Nsylvestris_NODE_11783_length_1895_cov_151	MTPC2_ARATH^MTPC2_ARATH^Q:424-1488,H:37-393^73.889%ID^E:5.46e-175^RecName: Full=Metal tolerance protein C2;^Eukaryota; Viridiplantae; Streptophyta; Embryophyta; Tracheophyta; Spermatophyta; Magnoliopsida; eudicotyledons; Gunneridae; Pentapetalae; rosids; malvids; Brassicales; Brassicaceae; Camelineae; Arabidopsis	0.511884	1.08407	0.948659	1.30402	0.654133	1.63246	1.94552	1.86097	0.999328	0.597201	0.855745	1.31443	1.10427	0.434384	-5.16195	-4.92317	-5.16195
1	Nsylvestris_NODE_11785_length_1895_cov_80	PUB33_ARATH^PUB33_ARATH^Q:514-666,H:38-88^47.059%ID^E:1.5e-07^RecName: Full=U-box domain-containing protein 33;^Eukaryota; Viridiplantae; Streptophyta; Embryophyta; Tracheophyta; Spermatophyta; Magnoliopsida; eudicotyledons; Gunneridae; Pentapetalae; rosids; malvids; Brassicales; Brassicaceae; Camelineae; Arabidopsis	0.358034	0.842485	-0.88513	0.0566493	-1.07818	1.82122	1.56589	0.987695	1.18517	0.820786	1.13564	0.492942	0.697929	0.838747	-3.80828	-1.80828	-3.22332
1	Nsylvestris_NODE_11786_length_1895_cov_79	.	1.0467	0.239623	0.968884	1.72381	-0.0842277	0.500735	1.79024	1.50073	1.26155	-0.0842277	0.826505	-0.66919	-0.66919	-0.34438	-2.66919	-2.66919	-2.66919
1	Nsylvestris_NODE_11794_length_1893_cov_233	DNJ10_ARATH^DNJ10_ARATH^Q:363-1508,H:1-380^75.654%ID^E:0^RecName: Full=Chaperone protein dnaJ 10;^Eukaryota; Viridiplantae; Streptophyta; Embryophyta; Tracheophyta; Spermatophyta; Magnoliopsida; eudicotyledons; Gunneridae; Pentapetalae; rosids; malvids; Brassicales; Brassicaceae; Camelineae; Arabidopsis	-0.454941	0.325047	-0.37657	0.17955	-0.244566	1.22558	1.45192	1.04464	0.837583	0.197681	0.338833	0.483328	0.516693	-0.0811474	-1.73652	-1.29503	-2.41208
1	Nsylvestris_NODE_1180_length_4719_cov_14	YTX2_XENLA^YTX2_XENLA^Q:2482-3159,H:375-598^26.106%ID^E:3.32e-22^RecName: Full=Transposon TX1 uncharacterized 149 kDa protein;^Eukaryota; Metazoa; Chordata; Craniata; Vertebrata; Euteleostomi; Amphibia; Batrachia; Anura; Pipoidea; Pipidae; Xenopodinae; Xenopus; Xenopus`YTX2_XENLA^YTX2_XENLA^Q:3201-3596,H:611-737^22.628%ID^E:3.32e-22^RecName: Full=Transposon TX1 uncharacterized 149 kDa protein;^Eu…	1.48817	2.27666	-0.748872	0.967335	-1.2343	1.83609	1.9032	1.6917	2.1162	-1.97126	0.613698	0.350663	1.7657	-0.386302	-3.55623	-3.55623	-3.55623
1	Nsylvestris_NODE_11800_length_1893_cov_111	PP166_ARATH^PP166_ARATH^Q:1842-739,H:83-449^41.576%ID^E:2.08e-92^RecName: Full=Pentatricopeptide repeat-containing protein At2g20710, mitochondrial;^Eukaryota; Viridiplantae; Streptophyta; Embryophyta; Tracheophyta; Spermatophyta; Magnoliopsida; eudicotyledons; Gunneridae; Pentapetalae; rosids; malvids; Brassicales; Brassicaceae; Camelineae; Arabidopsis	0.688431	1.41172	0.699159	0.94008	0.323306	1.89165	1.59448	1.28124	0.436216	-1.11824	0.0707974	0.265199	-0.187184	-0.0228745	-3.7032	-2.46849	-2.10229
1	Nsylvestris_NODE_11804_length_1893_cov_14	.	0.562617	1.68171	0.0067613	-2.90205	0.366982	2.19935	0.960896	1.47992	2.53657	-0.761273	1.68711	-0.295609	0.82369	0.359479	-2.90205	-2.90205	-2.90205
1	Nsylvestris_NODE_11806_length_1892_cov_214	ST7R_ARATH^ST7R_ARATH^Q:1577-276,H:1-432^81.336%ID^E:0^RecName: Full=7-dehydrocholesterol reductase;^Eukaryota; Viridiplantae; Streptophyta; Embryophyta; Tracheophyta; Spermatophyta; Magnoliopsida; eudicotyledons; Gunneridae; Pentapetalae; rosids; malvids; Brassicales; Brassicaceae; Camelineae; Arabidopsis	0.328597	1.14842	0.318114	0.439874	-0.460289	0.911187	1.07346	1.65616	0.67978	-0.287992	0.776095	0.511084	0.50115	0.16733	-2.63232	-2.50099	-2.62965
1	Nsylvestris_NODE_11812_length_1892_cov_86	PP311_ARATH^PP311_ARATH^Q:80-322,H:420-500^43.21%ID^E:4.02e-11^RecName: Full=Pentatricopeptide repeat-containing protein At4g14820;^Eukaryota; Viridiplantae; Streptophyta; Embryophyta; Tracheophyta; Spermatophyta; Magnoliopsida; eudicotyledons; Gunneridae; Pentapetalae; rosids; malvids; Brassicales; Brassicaceae; Camelineae; Arabidopsis`PP311_ARATH^PP311_ARATH^Q:301-393,H:506-531^41.935%ID^E:4.02…	-0.240968	0.440066	0.274636	1.6809	0.952708	1.76006	1.97508	1.76006	0.537671	0.952708	-0.725364	1.47658	0.952708	-1.23994	-4.04729	-4.04729	-2.46233
1	Nsylvestris_NODE_11817_length_1891_cov_21	.	-0.278933	0.85857	-0.600862	-0.278933	-1.60086	1.56906	1.4866	1.20649	1.09958	0.569063	1.4866	-1.0159	0.85857	-0.14143	-1.60086	-1.0159	-2.60086
1	Nsylvestris_NODE_1182_length_4716_cov_168	COP1_ARATH^COP1_ARATH^Q:2602-4245,H:130-675^72.81%ID^E:0^RecName: Full=E3 ubiquitin-protein ligase COP1 {ECO:0000303|PubMed:1423630};^Eukaryota; Viridiplantae; Streptophyta; Embryophyta; Tracheophyta; Spermatophyta; Magnoliopsida; eudicotyledons; Gunneridae; Pentapetalae; rosids; malvids; Brassicales; Brassicaceae; Camelineae; Arabidopsis`COP1_ARATH^COP1_ARATH^Q:1314-1715,H:3-132^57.353%ID^E:2.2e…	0.46186	1.29852	0.341942	0.858916	-0.512117	0.970498	1.15092	1.2913	0.772261	-0.0310431	0.373924	0.0735577	0.128052	-0.327107	-2.30023	-2.15066	-2.40059
1	Nsylvestris_NODE_11823_length_1890_cov_30	PP338_ARATH^PP338_ARATH^Q:1671-229,H:40-520^61.746%ID^E:0^RecName: Full=Pentatricopeptide repeat-containing protein At4g26680, mitochondrial;^Eukaryota; Viridiplantae; Streptophyta; Embryophyta; Tracheophyta; Spermatophyta; Magnoliopsida; eudicotyledons; Gunneridae; Pentapetalae; rosids; malvids; Brassicales; Brassicaceae; Camelineae; Arabidopsis	0.0772799	1.53974	0.343301	0.491997	-0.606441	1.62109	1.62854	0.906073	0.136276	-1.09393	1.20297	1.39098	0.285694	1.32399	-2.41586	-3.41586	-3.41586
1	Nsylvestris_NODE_11824_length_1890_cov_22	.	-1.64037	-0.180939	-0.470445	-0.833016	-0.180939	2.60756	2.14099	1.78589	1.60756	0.447092	0.819061	-0.055408	0.607557	-0.64037	-1.31844	-1.05541	-3.64037
1	Nsylvestris_NODE_1183_length_4715_cov_148	FTSHB_ARATH^FTSHB_ARATH^Q:2377-524,H:135-751^86.731%ID^E:0^RecName: Full=ATP-dependent zinc metalloprotease FTSH 11, chloroplastic/mitochondrial;^Eukaryota; Viridiplantae; Streptophyta; Embryophyta; Tracheophyta; Spermatophyta; Magnoliopsida; eudicotyledons; Gunneridae; Pentapetalae; rosids; malvids; Brassicales; Brassicaceae; Camelineae; Arabidopsis	-0.489544	0.72918	-0.0278768	-0.383435	-0.0184948	0.432978	0.636041	0.728738	1.06418	0.050714	1.07113	0.373221	0.386234	0.358427	-1.32277	-1.52517	-2.06355
1	Nsylvestris_NODE_11831_length_1891_cov_52	.	0.255383	1.51397	0.191253	-0.361288	1.63871	1.92204	1.22143	1.48698	1.09429	0.124139	1.21821	0.50265	1.27717	0.719597	-4.26818	-4.26818	-4.26818
1	Nsylvestris_NODE_11832_length_1889_cov_44	GENL2_ARATH^GENL2_ARATH^Q:85-1836,H:1-586^51.581%ID^E:0^RecName: Full=Flap endonuclease GEN-like 2;^Eukaryota; Viridiplantae; Streptophyta; Embryophyta; Tracheophyta; Spermatophyta; Magnoliopsida; eudicotyledons; Gunneridae; Pentapetalae; rosids; malvids; Brassicales; Brassicaceae; Camelineae; Arabidopsis	0.301952	1.54278	-0.698048	-1.28301	-0.28301	1.41743	1.96492	1.80445	1.96492	-0.279408	1.17642	0.785661	0.71699	-2.28301	-2.28301	-2.28301	-2.28301
1	Nsylvestris_NODE_11833_length_1890_cov_12	.	-0.322246	1.66169	-0.544638	-3.1296	0.192327	1.19233	2.39459	2.59832	1.95786	1.19233	1.45536	-0.322246	0.870399	0.192327	-3.1296	-3.1296	-3.1296
1	Nsylvestris_NODE_11835_length_1888_cov_80	SMYD3_HUMAN^SMYD3_HUMAN^Q:1001-681,H:161-270^32.727%ID^E:6.68e-12^RecName: Full=Histone-lysine N-methyltransferase SMYD3;^Eukaryota; Metazoa; Chordata; Craniata; Vertebrata; Euteleostomi; Mammalia; Eutheria; Euarchontoglires; Primates; Haplorrhini; Catarrhini; Hominidae; Homo	-0.639741	0.213581	-0.468796	-0.744431	0.00899352	1.31142	1.27443	1.29304	1.27574	0.51892	0.293414	0.679784	0.380942	-0.67043	-1.6518	-1.54346	-1.53162
1	Nsylvestris_NODE_11838_length_1888_cov_26	.	-0.125536	1.16397	0.511894	0.289502	-0.295461	1.41878	1.52267	1.83382	1.45943	0.404979	1.09686	-0.295461	0.874464	-0.973533	-3.29546	-2.29546	-3.29546
1	Nsylvestris_NODE_11840_length_1887_cov_224	DCE_PETHY^DCE_PETHY^Q:1717-230,H:1-500^88.4%ID^E:0^RecName: Full=Glutamate decarboxylase;^Eukaryota; Viridiplantae; Streptophyta; Embryophyta; Tracheophyta; Spermatophyta; Magnoliopsida; eudicotyledons; Gunneridae; Pentapetalae; asterids; lamiids; Solanales; Solanaceae; Petunioideae; Petunia	-0.21125	2.60334	1.08852	-0.976108	1.56854	0.603095	0.866129	1.64993	1.31268	-0.44184	0.0774875	1.60309	-1.20956	-3.3038	-1.22655	-2.27523	-1.72848
1	Nsylvestris_NODE_11842_length_1887_cov_212	FACE1_ARATH^FACE1_ARATH^Q:106-1377,H:1-424^85.377%ID^E:0^RecName: Full=CAAX prenyl protease 1 homolog;^Eukaryota; Viridiplantae; Streptophyta; Embryophyta; Tracheophyta; Spermatophyta; Magnoliopsida; eudicotyledons; Gunneridae; Pentapetalae; rosids; malvids; Brassicales; Brassicaceae; Camelineae; Arabidopsis	-0.00416587	0.916012	-0.0485137	0.369373	-0.0853139	1.00674	0.966809	1.01233	0.864861	0.218064	0.693007	0.685038	1.35691	0.713052	-2.28917	-3.14039	-3.23464
1	Nsylvestris_NODE_11846_length_1886_cov_204	ZIP4_ARATH^ZIP4_ARATH^Q:481-1623,H:1-374^65.445%ID^E:8.33e-149^RecName: Full=Zinc transporter 4, chloroplastic;^Eukaryota; Viridiplantae; Streptophyta; Embryophyta; Tracheophyta; Spermatophyta; Magnoliopsida; eudicotyledons; Gunneridae; Pentapetalae; rosids; malvids; Brassicales; Brassicaceae; Camelineae; Arabidopsis	0.621943	1.43618	0.763042	1.33524	0.242596	0.446786	0.626691	1.13434	-0.0719941	-1.21512	0.21127	-0.198774	-0.64714	-0.305043	-1.55422	-1.71378	-1.11202
1	Nsylvestris_NODE_11847_length_1886_cov_172	.	0.996091	1.15013	0.627704	1.13175	0.753235	1.40093	1.28929	-0.453216	2.03617	-0.630094	2.37773	1.4757	2.28929	1.01627	-5.15366	-5.15366	-5.15366
1	Nsylvestris_NODE_11851_length_1886_cov_102	.	0.488678	2.18912	0.488678	1.99118	0.812529	1.94811	1.22564	0.0736409	0.817323	-0.288929	0.075243	1.07524	-0.511322	-1.09628	-3.09628	-3.09628	-3.09628
1	Nsylvestris_NODE_11852_length_1886_cov_50	.	1.37509	1.47462	-0.847304	0.815661	1.61213	2.02717	1.96005	1.26817	1.26762	-1.11034	-0.110338	-1.05098	0.655197	-0.624911	-1.8473	-3.43227	-3.43227
1	Nsylvestris_NODE_11854_length_1886_cov_21	.	-0.0598591	-0.644822	0.525103	1.05562	0.355178	1.35518	0.81461	1.35518	1.94014	-1.05986	0.81461	-0.0598591	1.60311	-0.0598591	-2.64482	-2.64482	-2.64482
1	Nsylvestris_NODE_11855_length_1885_cov_217	.	0.290157	1.18029	0.236506	0.471238	0.198168	1.58564	1.94304	1.43071	0.463847	-0.479603	0.43854	0.451294	0.246401	0.0819929	-3.02044	-2.54259	-2.9752
1	Nsylvestris_NODE_11856_length_1885_cov_203	YO059_YEAST^YO059_YEAST^Q:487-1188,H:5-209^25.311%ID^E:1.82e-12^RecName: Full=Putative lipase YOR059C;^Eukaryota; Fungi; Dikarya; Ascomycota; Saccharomycotina; Saccharomycetes; Saccharomycetales; Saccharomycetaceae; Saccharomyces	0.730606	1.87023	1.0208	0.823751	-0.0898868	1.78851	2.08141	1.81349	2.16632	1.13117	1.92651	1.37473	0.778965	0.375186	-5.9306	-5.9306	-5.9306
1	Nsylvestris_NODE_11857_length_1885_cov_71	.	0.441556	1.88902	0.982125	0.441556	0.304053	1.23005	1.37444	1.06959	0.78948	-0.21052	1.15205	0.304053	-0.695947	-0.0178753	-3.01788	-3.01788	-3.01788
1	Nsylvestris_NODE_11858_length_1885_cov_53	EXO1_ARATH^EXO1_ARATH^Q:143-1183,H:1-333^42.363%ID^E:4.27e-84^RecName: Full=Exonuclease 1;^Eukaryota; Viridiplantae; Streptophyta; Embryophyta; Tracheophyta; Spermatophyta; Magnoliopsida; eudicotyledons; Gunneridae; Pentapetalae; rosids; malvids; Brassicales; Brassicaceae; Camelineae; Arabidopsis	-0.0396061	1.32296	-0.0396061	1.71008	1.40097	2.15304	2.47497	1.40097	0.738002	0.32136	0.473524	-1.262	-1.26682	-0.846961	-2.84696	-2.84696	-2.84696
1	Nsylvestris_NODE_11859_length_1885_cov_40	AB6I_ARATH^AB6I_ARATH^Q:986-225,H:84-338^80.392%ID^E:3.08e-143^RecName: Full=ABC transporter I family member 6, chloroplastic;^Eukaryota; Viridiplantae; Streptophyta; Embryophyta; Tracheophyta; Spermatophyta; Magnoliopsida; eudicotyledons; Gunneridae; Pentapetalae; rosids; malvids; Brassicales; Brassicaceae; Camelineae; Arabidopsis	-0.553871	0.0741604	0.234625	-0.205948	-0.312863	1.13969	1.9867	1.86934	0.308626	0.630554	0.315103	1.19615	1.03109	0.741585	-2.42834	-3.0133	-3.0133
1	Nsylvestris_NODE_11860_length_1885_cov_23	PPR52_ARATH^PPR52_ARATH^Q:698-1189,H:221-387^31.579%ID^E:5.83e-40^RecName: Full=Pentatricopeptide repeat-containing protein At1g19720;^Eukaryota; Viridiplantae; Streptophyta; Embryophyta; Tracheophyta; Spermatophyta; Magnoliopsida; eudicotyledons; Gunneridae; Pentapetalae; rosids; malvids; Brassicales; Brassicaceae; Camelineae; Arabidopsis`PPR52_ARATH^PPR52_ARATH^Q:463-678,H:131-212^31.707%ID^E:5…	0.390181	1.10639	0.489717	-0.0952456	-0.247249	0.752751	0.752751	0.582826	1.48972	0.390181	2.19754	-0.417174	1.10639	-3.41717	-1.83221	-1.41717	-1.83221
1	Nsylvestris_NODE_11862_length_1885_cov_13	DTX19_ARATH^DTX19_ARATH^Q:1710-301,H:7-475^58.475%ID^E:4.32e-170^RecName: Full=Protein DETOXIFICATION 19 {ECO:0000303|PubMed:11739388};^Eukaryota; Viridiplantae; Streptophyta; Embryophyta; Tracheophyta; Spermatophyta; Magnoliopsida; eudicotyledons; Gunneridae; Pentapetalae; rosids; malvids; Brassicales; Brassicaceae; Camelineae; Arabidopsis	0.768686	1.71047	-0.0599863	-0.0508788	-0.475855	0.329917	0.820135	0.420806	0.232236	-0.59355	0.146298	-0.271622	0.213118	-0.380462	-1.37116	-0.719081	-0.719081
1	Nsylvestris_NODE_1187_length_4713_cov_135	POLX_TOBAC^POLX_TOBAC^Q:3-425,H:1188-1328^58.156%ID^E:3.12e-36^RecName: Full=Retrovirus-related Pol polyprotein from transposon TNT 1-94;^Eukaryota; Viridiplantae; Streptophyta; Embryophyta; Tracheophyta; Spermatophyta; Magnoliopsida; eudicotyledons; Gunneridae; Pentapetalae; asterids; lamiids; Solanales; Solanaceae; Nicotianoideae; Nicotianeae; Nicotiana	0.123603	1.53991	-0.0629151	-0.455348	0.455745	1.28654	1.10291	0.776244	1.41676	-0.152945	0.996764	-0.356224	0.467127	0.28457	-2.63018	-2.34498	-2.44758
1	Nsylvestris_NODE_11872_length_1883_cov_85	Y2474_ARATH^Y2474_ARATH^Q:187-1863,H:26-578^72.549%ID^E:0^RecName: Full=BTB/POZ domain-containing protein At2g04740;^Eukaryota; Viridiplantae; Streptophyta; Embryophyta; Tracheophyta; Spermatophyta; Magnoliopsida; eudicotyledons; Gunneridae; Pentapetalae; rosids; malvids; Brassicales; Brassicaceae; Camelineae; Arabidopsis	1.05013	2.31012	0.913114	0.188136	-0.500119	1.88467	1.78518	1.1485	1.62222	0.44499	0.958263	0.882456	0.598391	-0.0650235	-4.40701	-4.40701	-4.40701
1	Nsylvestris_NODE_11874_length_1883_cov_20	.	0.886623	1.33731	-1.58933	-0.366934	-0.223821	1.14764	1.99082	0.633066	1.45565	-0.00436398	0.805736	0.906369	1.54927	0.994834	-3.17429	-3.17429	-3.17429
1	Nsylvestris_NODE_11877_length_1882_cov_189	SAMH1_DICDI^SAMH1_DICDI^Q:3-770,H:114-348^41.245%ID^E:4.12e-65^RecName: Full=Deoxynucleoside triphosphate triphosphohydrolase SAMHD1 homolog {ECO:0000305};^Eukaryota; Amoebozoa; Mycetozoa; Dictyostelids; Dictyosteliales; Dictyosteliaceae; Dictyostelium`SAMH1_DICDI^SAMH1_DICDI^Q:853-1362,H:349-488^31.176%ID^E:4.12e-65^RecName: Full=Deoxynucleoside triphosphate triphosphohydrolase SAMHD1 homolog {E…	0.433481	1.11636	-0.37225	-0.984559	-1.55755	1.96082	2.66004	1.37975	1.43747	-0.972587	1.51818	0.166843	0.249238	0.507056	-2.19719	-3.34713	-1.99798
1	Nsylvestris_NODE_11878_length_1882_cov_189	SKP2A_ARATH^SKP2A_ARATH^Q:1333-332,H:25-360^75%ID^E:0^RecName: Full=F-box protein SKP2A;^Eukaryota; Viridiplantae; Streptophyta; Embryophyta; Tracheophyta; Spermatophyta; Magnoliopsida; eudicotyledons; Gunneridae; Pentapetalae; rosids; malvids; Brassicales; Brassicaceae; Camelineae; Arabidopsis	0.00462854	0.423631	-0.139729	0.263535	-1.27536	1.25648	1.52356	1.42879	1.0559	-0.390063	0.878447	0.427435	-0.0718054	-0.554678	-1.38354	-1.2648	-2.18243
1	Nsylvestris_NODE_11879_length_1882_cov_118	APO4_ARATH^APO4_ARATH^Q:1863-1072,H:59-325^55.431%ID^E:2.17e-100^RecName: Full=APO protein 4, mitochondrial;^Eukaryota; Viridiplantae; Streptophyta; Embryophyta; Tracheophyta; Spermatophyta; Magnoliopsida; eudicotyledons; Gunneridae; Pentapetalae; rosids; malvids; Brassicales; Brassicaceae; Camelineae; Arabidopsis	-0.0411525	1.19223	0.638993	0.682472	0.90817	2.1768	1.41085	2.04703	1.33336	0.635836	1.19192	-0.434463	0.923413	0.421621	-4.36236	-4.36236	-4.36236
1	Nsylvestris_NODE_1188_length_4711_cov_123	MTEF5_ARATH^MTEF5_ARATH^Q:2098-842,H:50-467^66.429%ID^E:2.71e-178^RecName: Full=Transcription termination factor MTERF5, chloroplastic {ECO:0000305};^Eukaryota; Viridiplantae; Streptophyta; Embryophyta; Tracheophyta; Spermatophyta; Magnoliopsida; eudicotyledons; Gunneridae; Pentapetalae; rosids; malvids; Brassicales; Brassicaceae; Camelineae; Arabidopsis	0.369854	1.12604	-0.19198	-0.221926	-0.828041	1.14699	1.10065	0.849856	1.04092	-0.00603284	0.822078	0.465237	0.531908	-0.0790726	-2.08742	-1.9721	-2.06696
1	Nsylvestris_NODE_11882_length_1882_cov_41	.	1.65585	1.94535	0.655847	0.293277	0.80785	2.61521	2.77132	0.945354	-0.19215	-1.51408	-0.514078	0.293277	0.293277	-2.51408	-2.51408	-2.51408	-2.51408
1	Nsylvestris_NODE_11883_length_1882_cov_38	.	0.613694	2.16579	0.949539	-0.0916158	0.451259	-0.162366	-0.255532	0.250562	2.15449	0.861881	1.97717	1.48825	1.04245	1.33183	-4.25913	-4.25913	-4.25913
1	Nsylvestris_NODE_11885_length_1881_cov_211	SCP45_ARATH^SCP45_ARATH^Q:1764-400,H:7-461^72.747%ID^E:0^RecName: Full=Serine carboxypeptidase-like 45;^Eukaryota; Viridiplantae; Streptophyta; Embryophyta; Tracheophyta; Spermatophyta; Magnoliopsida; eudicotyledons; Gunneridae; Pentapetalae; rosids; malvids; Brassicales; Brassicaceae; Camelineae; Arabidopsis	-0.11948	1.06778	0.770693	1.16789	0.851702	0.539404	0.733907	0.830263	0.580508	-0.202527	-0.0589313	0.254128	0.896168	0.451297	-2.47354	-1.90832	-3.38093
1	Nsylvestris_NODE_11889_length_1881_cov_88	PUS6_ARATH^PUS6_ARATH^Q:1784-510,H:42-472^70.534%ID^E:0^RecName: Full=RNA pseudouridine synthase 6, chloroplastic;^Eukaryota; Viridiplantae; Streptophyta; Embryophyta; Tracheophyta; Spermatophyta; Magnoliopsida; eudicotyledons; Gunneridae; Pentapetalae; rosids; malvids; Brassicales; Brassicaceae; Camelineae; Arabidopsis	0.290364	1.74395	-0.1622	0.0824628	-1.02826	0.557106	0.746365	0.762512	1.45729	0.931025	1.49835	0.476785	0.716618	0.865009	-2.46483	-3.26025	-3.2123
1	Nsylvestris_NODE_11890_length_1881_cov_86	.	-0.957426	-0.957426	-0.957426	-0.957426	-0.957426	4.2905	4.2129	4.90056	-0.957426	-0.957426	-0.957426	-0.957426	-0.957426	-0.957426	-0.957426	-0.957426	-0.957426
1	Nsylvestris_NODE_11891_length_1881_cov_84	TAF15_ARATH^TAF15_ARATH^Q:1737-1006,H:3-235^67.755%ID^E:3.75e-90^RecName: Full=Transcription initiation factor TFIID subunit 15;^Eukaryota; Viridiplantae; Streptophyta; Embryophyta; Tracheophyta; Spermatophyta; Magnoliopsida; eudicotyledons; Gunneridae; Pentapetalae; rosids; malvids; Brassicales; Brassicaceae; Camelineae; Arabidopsis	0.551124	1.33002	0.635257	1.04053	-0.343036	0.683367	1.34581	1.32432	0.701621	0.206082	0.769618	0.613414	0.361207	-0.274754	-2.97447	-2.98623	-2.98387
1	Nsylvestris_NODE_11892_length_1881_cov_54	R1A_SOLDE^R1A_SOLDE^Q:1080-16,H:112-457^39.687%ID^E:5.14e-55^RecName: Full=Late blight resistance protein R1-A;^Eukaryota; Viridiplantae; Streptophyta; Embryophyta; Tracheophyta; Spermatophyta; Magnoliopsida; eudicotyledons; Gunneridae; Pentapetalae; asterids; lamiids; Solanales; Solanaceae; Solanoideae; Solaneae; Solanum	0.380107	0.679668	-0.512978	-0.150407	-0.995522	1.84959	1.13319	1.4249	1.84276	0.26463	0.549539	0.946454	1.38011	1.16895	-3.32033	-3.32033	-3.32033
1	Nsylvestris_NODE_11893_length_1881_cov_17	GAMYB_ORYSJ^GAMYB_ORYSJ^Q:42-1163,H:12-390^41.624%ID^E:3.49e-83^RecName: Full=Transcription factor GAMYB;^Eukaryota; Viridiplantae; Streptophyta; Embryophyta; Tracheophyta; Spermatophyta; Magnoliopsida; Liliopsida; Poales; Poaceae; BOP clade; Oryzoideae; Oryzeae; Oryzinae; Oryza; Oryza sativa	-0.728739	1.43758	-0.732341	0.968098	0.970316	0.968098	1.91151	1.85262	0.43598	0.603942	1.07398	-1.73234	0.43598	-0.147379	-2.73234	-2.73234	-1.85264
1	Nsylvestris_NODE_11894_length_1880_cov_219	PME58_ARATH^PME58_ARATH^Q:220-1692,H:54-566^53.891%ID^E:0^RecName: Full=Probable pectinesterase/pectinesterase inhibitor 58;^Eukaryota; Viridiplantae; Streptophyta; Embryophyta; Tracheophyta; Spermatophyta; Magnoliopsida; eudicotyledons; Gunneridae; Pentapetalae; rosids; malvids; Brassicales; Brassicaceae; Camelineae; Arabidopsis	0.889245	4.38233	1.78619	-0.363719	2.55736	0.783424	-4.98899	-0.798375	2.2452	-1.98899	0.935585	1.94576	0.0758067	-1.28191	0.0505871	-4.98899	-1.24053
1	Nsylvestris_NODE_119_length_8138_cov_130	.	1.02156	2.10393	0.81265	0.629384	0.960399	-0.305298	-0.264435	-0.425548	2.94113	1.58941	2.42935	2.14376	2.61435	1.90046	-4.71224	-6.71943	-6.71943
1	Nsylvestris_NODE_11901_length_1880_cov_119	.	-0.01786	1.63562	-0.235787	1.84984	1.34717	1.30531	0.636279	0.176848	-0.10178	-1.82315	-0.363721	0.184043	0.175043	-1.19321	-1.05762	-1.0158	-1.50122
1	Nsylvestris_NODE_11903_length_1880_cov_29	.	1.80944	3.46936	1.97294	1.5579	1.92047	2.72017	2.02356	1.86602	-1.83442	-0.834419	-1.24946	-2.83442	-0.834419	-1.24946	-2.83442	-2.83442	-2.83442
1	Nsylvestris_NODE_11908_length_1879_cov_182	CCB24_ARATH^CCB24_ARATH^Q:1579-272,H:1-430^63.535%ID^E:0^RecName: Full=Cyclin-B2-4;^Eukaryota; Viridiplantae; Streptophyta; Embryophyta; Tracheophyta; Spermatophyta; Magnoliopsida; eudicotyledons; Gunneridae; Pentapetalae; rosids; malvids; Brassicales; Brassicaceae; Camelineae; Arabidopsis	-0.477877	0.815293	-0.0116195	-0.25406	-1.36373	1.08485	2.03806	1.9053	0.166015	0.0848498	0.6139	0.391224	0.29261	0.744774	-1.29981	-1.27439	-3.45538
1	Nsylvestris_NODE_1191_length_4709_cov_224	SF3B3_MOUSE^SF3B3_MOUSE^Q:4301-2502,H:7-557^23.112%ID^E:1.38e-23^RecName: Full=Splicing factor 3B subunit 3;^Eukaryota; Metazoa; Chordata; Craniata; Vertebrata; Euteleostomi; Mammalia; Eutheria; Euarchontoglires; Glires; Rodentia; Myomorpha; Muroidea; Muridae; Murinae; Mus; Mus	-0.130604	0.868541	-0.589067	-0.451877	-0.618016	1.64038	1.17551	1.3622	1.20868	0.0859473	0.623853	0.115366	0.574649	0.219003	-2.0313	-1.61626	-2.437
1	Nsylvestris_NODE_11910_length_1879_cov_167	EGY2_ARATH^EGY2_ARATH^Q:72-1622,H:14-551^63.406%ID^E:0^RecName: Full=Probable zinc metalloprotease EGY2, chloroplastic;^Eukaryota; Viridiplantae; Streptophyta; Embryophyta; Tracheophyta; Spermatophyta; Magnoliopsida; eudicotyledons; Gunneridae; Pentapetalae; rosids; malvids; Brassicales; Brassicaceae; Camelineae; Arabidopsis	0.651434	1.69477	0.887672	0.326221	0.169217	2.00863	1.45135	1.48967	1.73711	0.679569	2.00173	1.01511	1.15062	1.38926	-5.55079	-5.55079	-5.55079
1	Nsylvestris_NODE_11916_length_1878_cov_227	DHQS_SOLLC^DHQS_SOLLC^Q:1747-422,H:1-442^93.679%ID^E:0^RecName: Full=3-dehydroquinate synthase, chloroplastic;^Eukaryota; Viridiplantae; Streptophyta; Embryophyta; Tracheophyta; Spermatophyta; Magnoliopsida; eudicotyledons; Gunneridae; Pentapetalae; asterids; lamiids; Solanales; Solanaceae; Solanoideae; Solaneae; Solanum; Lycopersicon	0.230854	0.777224	0.0884938	0.286731	-0.626737	1.46616	1.50924	1.90085	0.394996	-0.227306	0.207663	0.328928	0.386261	0.308446	-2.08023	-2.13605	-2.81552
1	Nsylvestris_NODE_11919_length_1878_cov_150	CFI3_ARATH^CFI3_ARATH^Q:237-716,H:1-160^67.702%ID^E:5.89e-54^RecName: Full=Probable chalcone--flavonone isomerase 3;^Eukaryota; Viridiplantae; Streptophyta; Embryophyta; Tracheophyta; Spermatophyta; Magnoliopsida; eudicotyledons; Gunneridae; Pentapetalae; rosids; malvids; Brassicales; Brassicaceae; Camelineae; Arabidopsis`CFI3_ARATH^CFI3_ARATH^Q:1397-1555,H:157-209^64.151%ID^E:6.54e-14^RecName: F…	-0.299851	0.847495	-0.0238008	-0.119473	0.268955	0.839724	1.96702	1.52825	0.165221	-0.759235	0.062646	0.971518	1.00946	0.575278	-2.05501	-2.04222	-2.93599
1	Nsylvestris_NODE_11920_length_1878_cov_148	.	0.763394	1.64349	-0.0401371	0.183528	-0.043568	2.08721	2.00706	1.34364	1.61983	-0.164609	0.222326	1.07824	1.78425	0.82301	-4.43589	-4.43589	-4.43589
1	Nsylvestris_NODE_11924_length_1878_cov_43	OST3B_ARATH^OST3B_ARATH^Q:150-1091,H:34-345^58.413%ID^E:4.32e-128^RecName: Full=Probable dolichyl-diphosphooligosaccharide--protein glycosyltransferase subunit 3B;^Eukaryota; Viridiplantae; Streptophyta; Embryophyta; Tracheophyta; Spermatophyta; Magnoliopsida; eudicotyledons; Gunneridae; Pentapetalae; rosids; malvids; Brassicales; Brassicaceae; Camelineae; Arabidopsis	-0.0561349	0.325736	0.342083	0.4973	0.292132	0.543327	0.423033	0.257023	0.837992	-0.456673	0.280408	0.507689	0.45406	-1.01307	-0.515567	-0.998711	-1.72063
1	Nsylvestris_NODE_11927_length_1877_cov_225	Y4424_ARATH^Y4424_ARATH^Q:142-1635,H:1-494^73.81%ID^E:0^RecName: Full=DUF21 domain-containing protein At4g14240;^Eukaryota; Viridiplantae; Streptophyta; Embryophyta; Tracheophyta; Spermatophyta; Magnoliopsida; eudicotyledons; Gunneridae; Pentapetalae; rosids; malvids; Brassicales; Brassicaceae; Camelineae; Arabidopsis	0.440215	1.13749	0.893107	0.675357	0.0536478	1.69882	1.87224	1.86234	1.069	0.130394	0.68983	0.791695	0.815822	0.42185	-4.66685	-3.54714	-4.33781
1	Nsylvestris_NODE_11929_length_1877_cov_163	NIPA6_ARATH^NIPA6_ARATH^Q:1455-571,H:1-295^73.559%ID^E:6.95e-128^RecName: Full=Probable magnesium transporter NIPA6;^Eukaryota; Viridiplantae; Streptophyta; Embryophyta; Tracheophyta; Spermatophyta; Magnoliopsida; eudicotyledons; Gunneridae; Pentapetalae; rosids; malvids; Brassicales; Brassicaceae; Camelineae; Arabidopsis	0.884138	1.52919	0.32841	0.659708	-0.409099	1.97033	2.47538	2.18436	1.3974	1.04453	1.32906	0.628766	0.974093	0.416411	-5.13756	-5.13756	-5.13756
1	Nsylvestris_NODE_1193_length_4708_cov_104	Y3544_ARATH^Y3544_ARATH^Q:560-1096,H:121-301^51.381%ID^E:4.48e-40^RecName: Full=Uncharacterized CRM domain-containing protein At3g25440, chloroplastic;^Eukaryota; Viridiplantae; Streptophyta; Embryophyta; Tracheophyta; Spermatophyta; Magnoliopsida; eudicotyledons; Gunneridae; Pentapetalae; rosids; malvids; Brassicales; Brassicaceae; Camelineae; Arabidopsis	0.130244	1.13703	-0.131149	-0.119938	-0.00230382	1.14896	1.59249	1.07143	0.674014	0.193843	0.567699	0.130361	0.387555	-0.177611	-2.41696	-1.94541	-2.24026
1	Nsylvestris_NODE_11931_length_1877_cov_155	IST1L_DICDI^IST1L_DICDI^Q:1691-1164,H:4-177^35.795%ID^E:4.07e-31^RecName: Full=IST1-like protein;^Eukaryota; Amoebozoa; Mycetozoa; Dictyostelids; Dictyosteliales; Dictyosteliaceae; Dictyostelium	0.878316	2.09381	0.0500581	-0.341863	-0.272619	0.806334	0.612601	1.31227	1.78734	1.24495	2.20893	2.54614	2.44384	1.89792	-4.6555	-6.30626	-6.30626
1	Nsylvestris_NODE_11939_length_1876_cov_180	GPX4_ARATH^GPX4_ARATH^Q:999-1499,H:1-167^73.054%ID^E:8.97e-78^RecName: Full=Probable glutathione peroxidase 4;^Eukaryota; Viridiplantae; Streptophyta; Embryophyta; Tracheophyta; Spermatophyta; Magnoliopsida; eudicotyledons; Gunneridae; Pentapetalae; rosids; malvids; Brassicales; Brassicaceae; Camelineae; Arabidopsis	0.360747	1.17402	0.330657	0.548735	0.203324	1.54863	1.38786	0.991675	0.892943	-0.780914	0.915409	0.319511	0.523349	-0.282075	-3.06703	-2.40316	-2.66368
1	Nsylvestris_NODE_11943_length_1876_cov_24	RNHX1_ARATH^RNHX1_ARATH^Q:1209-886,H:21-129^37.615%ID^E:2.35e-11^RecName: Full=Putative ribonuclease H protein At1g65750;^Eukaryota; Viridiplantae; Streptophyta; Embryophyta; Tracheophyta; Spermatophyta; Magnoliopsida; eudicotyledons; Gunneridae; Pentapetalae; rosids; malvids; Brassicales; Brassicaceae; Camelineae; Arabidopsis	0.778257	2.36322	0.777054	1.89373	-0.484778	-0.806706	-0.221743	-1.16054	0.893734	0.777054	-0.174438	0.277358	1.02922	0.893734	-2.80671	-2.80671	-1.22174
1	Nsylvestris_NODE_11946_length_1875_cov_202	AB17B_XENTR^AB17B_XENTR^Q:499-1152,H:63-281^51.818%ID^E:7.32e-66^RecName: Full=Alpha/beta hydrolase domain-containing protein 17B {ECO:0000305};^Eukaryota; Metazoa; Chordata; Craniata; Vertebrata; Euteleostomi; Amphibia; Batrachia; Anura; Pipoidea; Pipidae; Xenopodinae; Xenopus; Silurana	0.440099	1.32408	0.405834	0.931854	-0.0835165	1.11241	1.43147	1.48648	0.454113	0.151142	0.40308	0.0641222	-0.231644	0.303316	-2.04449	-3.22498	-2.92338
1	Nsylvestris_NODE_11949_length_1875_cov_173	.	-0.0072449	0.668273	-0.500374	0.0141206	-1.25283	1.0734	1.40422	1.70905	0.712548	0.110984	0.453586	-0.0372435	0.0290351	-0.252612	-2.01749	-1.16991	-0.937518
1	Nsylvestris_NODE_11952_length_1875_cov_123	NAC90_ARATH^NAC90_ARATH^Q:1836-1159,H:4-234^53.419%ID^E:9.49e-79^RecName: Full=NAC domain-containing protein 90;^Eukaryota; Viridiplantae; Streptophyta; Embryophyta; Tracheophyta; Spermatophyta; Magnoliopsida; eudicotyledons; Gunneridae; Pentapetalae; rosids; malvids; Brassicales; Brassicaceae; Camelineae; Arabidopsis	-0.480252	0.0182424	0.159651	0.718729	0.107125	1.16382	1.39059	1.47822	0.377119	0.116319	0.00801989	-0.0165046	0.549395	-0.733767	-1.90792	-1.21285	-1.73593
1	Nsylvestris_NODE_11953_length_1875_cov_109	SYKM_ARATH^SYKM_ARATH^Q:1199-1471,H:513-602^75.824%ID^E:4.07e-34^RecName: Full=Lysine--tRNA ligase, chloroplastic/mitochondrial {ECO:0000305};^Eukaryota; Viridiplantae; Streptophyta; Embryophyta; Tracheophyta; Spermatophyta; Magnoliopsida; eudicotyledons; Gunneridae; Pentapetalae; rosids; malvids; Brassicales; Brassicaceae; Camelineae; Arabidopsis	0.103836	0.891197	0.370188	0.111894	-0.0803687	1.44333	1.08704	1.32815	0.924215	-0.179817	0.828683	0.841986	1.27004	0.358947	-4.63925	-2.03518	-2.62489
1	Nsylvestris_NODE_11957_length_1874_cov_221	MRS2I_ORYSI^MRS2I_ORYSI^Q:1498-392,H:20-376^77.027%ID^E:7.28e-176^RecName: Full=Magnesium transporter MRS2-I;^Eukaryota; Viridiplantae; Streptophyta; Embryophyta; Tracheophyta; Spermatophyta; Magnoliopsida; Liliopsida; Poales; Poaceae; BOP clade; Oryzoideae; Oryzeae; Oryzinae; Oryza; Oryza sativa	-0.137505	0.759328	0.0584866	0.319539	-0.736976	0.791267	1.09612	1.05089	0.7768	0.291414	0.41334	0.198386	-0.0898937	-0.0914287	-1.52361	-1.39673	-1.77943
1	Nsylvestris_NODE_11959_length_1874_cov_211	.	0.48555	1.40448	0.333757	1.10439	0.463997	1.96324	2.30273	2.01611	1.36545	1.21096	1.16925	0.747678	0.823978	0.552976	-5.40325	-6.4459	-4.0954
1	Nsylvestris_NODE_11963_length_1874_cov_179	ASPG1_ARATH^ASPG1_ARATH^Q:296-1615,H:36-500^52.979%ID^E:1.14e-151^RecName: Full=Protein ASPARTIC PROTEASE IN GUARD CELL 1;^Eukaryota; Viridiplantae; Streptophyta; Embryophyta; Tracheophyta; Spermatophyta; Magnoliopsida; eudicotyledons; Gunneridae; Pentapetalae; rosids; malvids; Brassicales; Brassicaceae; Camelineae; Arabidopsis	1.23771	1.33082	0.283152	0.556299	0.103408	0.553211	1.95531	1.06778	0.7806	0.746757	-0.455057	0.330818	0.0663403	1.20529	-3.25414	-3.25414	-3.25414
1	Nsylvestris_NODE_11970_length_1874_cov_22	GLOX1_ARATH^GLOX1_ARATH^Q:1694-132,H:96-614^45.747%ID^E:4.77e-153^RecName: Full=Aldehyde oxidase GLOX1 {ECO:0000305};^Eukaryota; Viridiplantae; Streptophyta; Embryophyta; Tracheophyta; Spermatophyta; Magnoliopsida; eudicotyledons; Gunneridae; Pentapetalae; rosids; malvids; Brassicales; Brassicaceae; Camelineae; Arabidopsis	1.0806	1.97301	0.921351	1.60464	0.921351	-1.2699	-1.2699	-0.294143	-0.199506	-1.13239	-0.00626014	-0.154418	0.393221	-1.47579	-0.00686114	-1.31881	0.233792
1	Nsylvestris_NODE_11973_length_1873_cov_217	BGL11_ARATH^BGL11_ARATH^Q:1731-325,H:21-511^58.418%ID^E:0^RecName: Full=Beta-glucosidase 11;^Eukaryota; Viridiplantae; Streptophyta; Embryophyta; Tracheophyta; Spermatophyta; Magnoliopsida; eudicotyledons; Gunneridae; Pentapetalae; rosids; malvids; Brassicales; Brassicaceae; Camelineae; Arabidopsis	0.135906	1.15697	0.715496	-0.163256	0.247778	1.56605	2.00659	1.77617	0.922166	0.138448	0.649297	0.898845	1.18925	0.721746	-4.71265	-3.29598	-3.95283
1	Nsylvestris_NODE_11978_length_1873_cov_28	.	-0.341314	1.46604	0.774163	0.0737233	-0.341314	1.53315	2.85508	0.0737233	0.774163	-0.341314	1.16119	0.774163	0.658686	-0.341314	-2.92628	-2.92628	-2.92628
1	Nsylvestris_NODE_11979_length_1872_cov_217	FAB1C_ARATH^FAB1C_ARATH^Q:904-1482,H:1-177^33.333%ID^E:5.04e-14^RecName: Full=Putative 1-phosphatidylinositol-3-phosphate 5-kinase FAB1C;^Eukaryota; Viridiplantae; Streptophyta; Embryophyta; Tracheophyta; Spermatophyta; Magnoliopsida; eudicotyledons; Gunneridae; Pentapetalae; rosids; malvids; Brassicales; Brassicaceae; Camelineae; Arabidopsis	0.037574	0.82138	-0.126053	0.0383753	-0.431911	3.11558	2.2252	2.75029	1.80122	-0.132351	1.11596	0.115577	1.39121	-0.324996	-4.13235	-4.13235	-4.13235
1	Nsylvestris_NODE_11982_length_1871_cov_103	.	0.958298	1.9017	0.38628	1.08453	0.0142901	1.17336	0.806754	0.691594	2.25232	1.48681	1.76087	1.97709	1.72956	1.69564	-5.97303	-5.97303	-5.97303
1	Nsylvestris_NODE_11983_length_1871_cov_40	C724B_ORYSJ^C724B_ORYSJ^Q:1609-236,H:24-478^63.519%ID^E:0^RecName: Full=Cytochrome P450 724B1;^Eukaryota; Viridiplantae; Streptophyta; Embryophyta; Tracheophyta; Spermatophyta; Magnoliopsida; Liliopsida; Poales; Poaceae; BOP clade; Oryzoideae; Oryzeae; Oryzinae; Oryza; Oryza sativa	-1.18954	-0.434134	-0.198844	0.983992	1.48025	1.87399	2.12775	-0.019096	1.22318	-1.15742	1.46486	0.873989	0.817405	0.632981	-2.82645	-2.82645	-2.82645
1	Nsylvestris_NODE_11985_length_1871_cov_223	GFA2_ARATH^GFA2_ARATH^Q:202-1503,H:1-448^58.186%ID^E:2.93e-175^RecName: Full=Chaperone protein dnaJ GFA2, mitochondrial {ECO:0000305};^Eukaryota; Viridiplantae; Streptophyta; Embryophyta; Tracheophyta; Spermatophyta; Magnoliopsida; eudicotyledons; Gunneridae; Pentapetalae; rosids; malvids; Brassicales; Brassicaceae; Camelineae; Arabidopsis	0.207577	0.754796	0.215108	0.0909783	-1.12318	1.1642	1.68794	1.58392	1.10401	0.513465	1.00659	0.363505	0.345758	0.408922	-2.3499	-3.11941	-2.85429
1	Nsylvestris_NODE_11987_length_1871_cov_154	FRI2_TOBAC^FRI2_TOBAC^Q:618-1394,H:1-259^99.228%ID^E:1.51e-175^RecName: Full=Ferritin-2, chloroplastic;^Eukaryota; Viridiplantae; Streptophyta; Embryophyta; Tracheophyta; Spermatophyta; Magnoliopsida; eudicotyledons; Gunneridae; Pentapetalae; asterids; lamiids; Solanales; Solanaceae; Nicotianoideae; Nicotianeae; Nicotiana	0.738536	2.0411	0.770245	1.07957	0.17742	1.33415	1.68963	1.46585	2.11087	0.861393	1.70955	1.23537	1.14138	0.904894	-5.75332	-5.75332	-5.75332
1	Nsylvestris_NODE_11991_length_1870_cov_216	BAG7_ARATH^BAG7_ARATH^Q:1748-564,H:1-442^43.668%ID^E:4.01e-86^RecName: Full=BAG family molecular chaperone regulator 7;^Eukaryota; Viridiplantae; Streptophyta; Embryophyta; Tracheophyta; Spermatophyta; Magnoliopsida; eudicotyledons; Gunneridae; Pentapetalae; rosids; malvids; Brassicales; Brassicaceae; Camelineae; Arabidopsis	0.0654769	1.00985	0.748461	0.913492	0.572751	0.816178	1.05112	0.834901	0.201942	-0.285144	-0.170953	-0.0140123	-0.0415481	-0.266754	-1.93422	-1.84459	-1.65696
1	Nsylvestris_NODE_11998_length_1870_cov_138	FBK9_ARATH^FBK9_ARATH^Q:429-1490,H:15-381^43.207%ID^E:7.65e-92^RecName: Full=F-box/kelch-repeat protein At1g23390;^Eukaryota; Viridiplantae; Streptophyta; Embryophyta; Tracheophyta; Spermatophyta; Magnoliopsida; eudicotyledons; Gunneridae; Pentapetalae; rosids; malvids; Brassicales; Brassicaceae; Camelineae; Arabidopsis	0.941366	1.54029	0.209819	1.14906	0.0871125	1.09201	0.937289	0.824078	0.116259	-1.33251	-0.114251	0.351782	0.268118	0.0673492	-1.79063	-2.17474	-2.17239
1	Nsylvestris_NODE_120_length_8132_cov_55	PDR1_TOBAC^PDR1_TOBAC^Q:3310-524,H:496-1434^81.809%ID^E:0^RecName: Full=Pleiotropic drug resistance protein 1;^Eukaryota; Viridiplantae; Streptophyta; Embryophyta; Tracheophyta; Spermatophyta; Magnoliopsida; eudicotyledons; Gunneridae; Pentapetalae; asterids; lamiids; Solanales; Solanaceae; Nicotianoideae; Nicotianeae; Nicotiana`PDR1_TOBAC^PDR1_TOBAC^Q:4163-3294,H:217-477^77.931%ID^E:2.34e-132^Re…	0.575018	0.939708	-0.408405	0.49072	-0.661426	0.856754	0.546365	1.15045	0.731947	-0.526921	0.225089	0.213216	-0.241407	-0.470604	-0.912346	-0.427674	-2.08048
1	Nsylvestris_NODE_12004_length_1869_cov_100	MO25N_ARATH^MO25N_ARATH^Q:421-1425,H:1-338^70.088%ID^E:2.83e-170^RecName: Full=Putative MO25-like protein At5g47540;^Eukaryota; Viridiplantae; Streptophyta; Embryophyta; Tracheophyta; Spermatophyta; Magnoliopsida; eudicotyledons; Gunneridae; Pentapetalae; rosids; malvids; Brassicales; Brassicaceae; Camelineae; Arabidopsis	0.35668	1.72586	0.518713	1.24887	1.12577	1.87987	2.12779	1.22564	1.24397	0.723851	0.247238	0.2931	0.995344	0.402592	-4.7051	-4.7051	-4.7051
1	Nsylvestris_NODE_12005_length_1869_cov_81	MET22_HUMAN^MET22_HUMAN^Q:1250-1801,H:226-398^37.234%ID^E:2.19e-18^RecName: Full=Methyltransferase-like protein 22;^Eukaryota; Metazoa; Chordata; Craniata; Vertebrata; Euteleostomi; Mammalia; Eutheria; Euarchontoglires; Primates; Haplorrhini; Catarrhini; Hominidae; Homo`MET22_HUMAN^MET22_HUMAN^Q:299-655,H:88-235^29.801%ID^E:2.93e-10^RecName: Full=Methyltransferase-like protein 22;^Eukaryota; Meta…	0.378616	0.489647	0.64165	1.19419	-0.805809	1.05669	1.57094	1.55647	0.542115	-0.563691	0.648846	0.779154	0.729339	0.241285	-3.25089	-1.94331	-3.26524
1	Nsylvestris_NODE_12006_length_1867_cov_52	SBT54_ARATH^SBT54_ARATH^Q:1199-1492,H:410-507^68.367%ID^E:5.9e-32^RecName: Full=Subtilisin-like protease SBT5.4 {ECO:0000303|PubMed:16193095};^Eukaryota; Viridiplantae; Streptophyta; Embryophyta; Tracheophyta; Spermatophyta; Magnoliopsida; eudicotyledons; Gunneridae; Pentapetalae; rosids; malvids; Brassicales; Brassicaceae; Camelineae; Arabidopsis`SBT54_ARATH^SBT54_ARATH^Q:1474-1554,H:502-528^55.…	0.143263	1.49457	0.843703	-0.664092	0.0341268	1.42719	1.90272	1.33185	1.20775	-1.04351	0.682865	0.92027	0.436886	1.06056	-3.66409	-3.66409	-2.44997
1	Nsylvestris_NODE_12009_length_1868_cov_220	TCMO_CATRO^TCMO_CATRO^Q:1705-257,H:23-505^91.925%ID^E:0^RecName: Full=Trans-cinnamate 4-monooxygenase;^Eukaryota; Viridiplantae; Streptophyta; Embryophyta; Tracheophyta; Spermatophyta; Magnoliopsida; eudicotyledons; Gunneridae; Pentapetalae; asterids; lamiids; Gentianales; Apocynaceae; Rauvolfioideae; Vinceae; Catharanthinae; Catharanthus	0.0752248	0.69003	0.0134378	0.0243509	-0.38663	0.610372	1.36588	0.527638	0.830269	-0.325136	0.744814	0.0877394	0.10048	-0.00909216	-1.21299	-1.53804	-1.59835
1	Nsylvestris_NODE_1201_length_4705_cov_218	SUT42_ARATH^SUT42_ARATH^Q:2477-4375,H:49-675^72.196%ID^E:0^RecName: Full=Probable sulfate transporter 4.2;^Eukaryota; Viridiplantae; Streptophyta; Embryophyta; Tracheophyta; Spermatophyta; Magnoliopsida; eudicotyledons; Gunneridae; Pentapetalae; rosids; malvids; Brassicales; Brassicaceae; Camelineae; Arabidopsis	0.0581455	1.0642	-0.288515	-0.0433523	-0.27196	1.16472	1.48221	1.37347	0.960237	0.0670004	0.537126	0.481772	0.376156	0.000819036	-2.41386	-1.98188	-2.56629
1	Nsylvestris_NODE_12010_length_1868_cov_212	GUN_PHAVU^GUN_PHAVU^Q:1690-329,H:40-493^74.449%ID^E:0^RecName: Full=Endoglucanase;^Eukaryota; Viridiplantae; Streptophyta; Embryophyta; Tracheophyta; Spermatophyta; Magnoliopsida; eudicotyledons; Gunneridae; Pentapetalae; rosids; fabids; Fabales; Fabaceae; Papilionoideae; 50 kb inversion clade; NPAAA clade; indigoferoid/millettioid clade; Phaseoleae; Phaseolus	-0.409681	0.621889	0.779502	-2.17097	-0.170967	2.99896	3.82903	2.63639	-0.89596	-0.124825	1.76732	-2.17097	-0.586004	-0.590821	-1.17097	-2.17097	-2.17097
1	Nsylvestris_NODE_12012_length_1868_cov_208	ATPG_TOBAC^ATPG_TOBAC^Q:277-1407,H:1-377^97.878%ID^E:0^RecName: Full=ATP synthase gamma chain, chloroplastic;^Eukaryota; Viridiplantae; Streptophyta; Embryophyta; Tracheophyta; Spermatophyta; Magnoliopsida; eudicotyledons; Gunneridae; Pentapetalae; asterids; lamiids; Solanales; Solanaceae; Nicotianoideae; Nicotianeae; Nicotiana	0.76122	1.836	1.31242	0.501465	0.851151	1.4005	1.88694	1.81184	1.30711	0.501089	1.20171	0.859216	0.826424	0.763166	-4.88033	-4.86992	-6.07
1	Nsylvestris_NODE_12015_length_1868_cov_166	BECN1_ARATH^BECN1_ARATH^Q:1701-610,H:7-363^73.224%ID^E:2.15e-167^RecName: Full=Beclin-1-like protein {ECO:0000305};^Eukaryota; Viridiplantae; Streptophyta; Embryophyta; Tracheophyta; Spermatophyta; Magnoliopsida; eudicotyledons; Gunneridae; Pentapetalae; rosids; malvids; Brassicales; Brassicaceae; Camelineae; Arabidopsis	0.557149	1.19591	0.202081	0.128887	-0.51558	1.61341	1.16621	1.48648	0.818447	-0.613022	1.04002	-0.229384	0.793646	0.232172	-2.91868	-2.51352	-2.44423
1	Nsylvestris_NODE_12019_length_1867_cov_176	TLOV1_ARATH^TLOV1_ARATH^Q:1437-424,H:24-375^52.778%ID^E:1.18e-103^RecName: Full=Protein TWIN LOV 1;^Eukaryota; Viridiplantae; Streptophyta; Embryophyta; Tracheophyta; Spermatophyta; Magnoliopsida; eudicotyledons; Gunneridae; Pentapetalae; rosids; malvids; Brassicales; Brassicaceae; Camelineae; Arabidopsis`TLOV1_ARATH^TLOV1_ARATH^Q:1443-1090,H:244-362^37.5%ID^E:7.41e-14^RecName: Full=Protein TWIN …	-0.0239919	0.915032	-0.0549139	-0.324641	-0.695958	1.3372	1.89632	0.896323	-0.180669	0.0581657	-0.189128	-0.433885	0.00778373	0.105044	-1.09076	-0.89837	-1.32356
1	Nsylvestris_NODE_12020_length_1867_cov_165	SWET1_ARATH^SWET1_ARATH^Q:675-1379,H:1-237^68.354%ID^E:4.74e-108^RecName: Full=Bidirectional sugar transporter SWEET1 {ECO:0000303|PubMed:21107422};^Eukaryota; Viridiplantae; Streptophyta; Embryophyta; Tracheophyta; Spermatophyta; Magnoliopsida; eudicotyledons; Gunneridae; Pentapetalae; rosids; malvids; Brassicales; Brassicaceae; Camelineae; Arabidopsis	-0.221338	-0.328815	-0.884565	-0.629211	-0.911796	1.87777	2.19426	1.24053	2.29534	0.895038	1.77655	0.390497	0.926558	-0.0678814	-2.95951	-2.72299	-2.87044
1	Nsylvestris_NODE_12021_length_1867_cov_116	.	0.364615	1.50949	0.274389	0.449941	-0.591879	1.2033	1.44994	1.51048	1.3532	0.027741	0.993932	1.15329	0.127498	0.404722	-4.67934	-1.87199	-3.67934
1	Nsylvestris_NODE_12022_length_1867_cov_80	COL1_ARATH^COL1_ARATH^Q:1029-1271,H:261-340^39.506%ID^E:1.01e-08^RecName: Full=Zinc finger protein CONSTANS-LIKE 1;^Eukaryota; Viridiplantae; Streptophyta; Embryophyta; Tracheophyta; Spermatophyta; Magnoliopsida; eudicotyledons; Gunneridae; Pentapetalae; rosids; malvids; Brassicales; Brassicaceae; Camelineae; Arabidopsis	0.338113	2.73567	1.45532	1.13028	-1.34582	0.8237	1.98978	0.634152	1.21606	0.11722	1.01393	0.358228	-0.378737	-0.0612553	-3.34221	-3.34221	-3.34221
1	Nsylvestris_NODE_12024_length_1867_cov_41	LSM1B_ARATH^LSM1B_ARATH^Q:1844-1494,H:11-128^75.424%ID^E:3.6e-53^RecName: Full=Sm-like protein LSM1B {ECO:0000305};^Eukaryota; Viridiplantae; Streptophyta; Embryophyta; Tracheophyta; Spermatophyta; Magnoliopsida; eudicotyledons; Gunneridae; Pentapetalae; rosids; malvids; Brassicales; Brassicaceae; Camelineae; Arabidopsis	0.252577	-0.305232	-0.0693514	0.206649	0.344784	1.51561	1.32617	0.803149	1.51521	-0.194882	1.04613	0.738004	0.930649	0.0461258	-3.65431	-0.846959	-3.65431
1	Nsylvestris_NODE_12025_length_1866_cov_137	SDR1_ARATH^SDR1_ARATH^Q:830-216,H:92-296^55.825%ID^E:2.54e-72^RecName: Full=(+)-neomenthol dehydrogenase {ECO:0000303|PubMed:18599651};^Eukaryota; Viridiplantae; Streptophyta; Embryophyta; Tracheophyta; Spermatophyta; Magnoliopsida; eudicotyledons; Gunneridae; Pentapetalae; rosids; malvids; Brassicales; Brassicaceae; Camelineae; Arabidopsis`SDR1_ARATH^SDR1_ARATH^Q:1756-1499,H:5-92^59.091%ID^E:9.9…	0.0560739	0.222728	0.80145	1.45743	0.349672	1.92246	2.83196	1.54564	-0.818435	-0.801741	-0.426897	-1.43806	-0.432973	-0.215469	-1.20244	-1.70994	-2.14147
1	Nsylvestris_NODE_12028_length_1866_cov_79	.	0.0608883	0.862442	0.195127	0.744423	-0.372118	0.96607	1.29791	1.55136	1.27741	0.377122	0.0397719	-0.357102	-0.172728	0.83192	-2.66232	-2.08456	-2.55563
1	Nsylvestris_NODE_12029_length_1866_cov_69	APRF1_ARATH^APRF1_ARATH^Q:226-1146,H:5-314^50.161%ID^E:6.54e-107^RecName: Full=Protein ANTHESIS POMOTING FACTOR 1 {ECO:0000303|PubMed:27968983};^Eukaryota; Viridiplantae; Streptophyta; Embryophyta; Tracheophyta; Spermatophyta; Magnoliopsida; eudicotyledons; Gunneridae; Pentapetalae; rosids; malvids; Brassicales; Brassicaceae; Camelineae; Arabidopsis	0.530655	1.10334	-0.386913	0.035343	-0.573148	0.787657	1.36404	1.64327	0.858046	-0.54519	0.612053	0.431549	0.686157	-0.0113071	-2.0165	-2.66857	-1.85049
1	Nsylvestris_NODE_1203_length_4704_cov_175	PHSL1_SOLTU^PHSL1_SOLTU^Q:4400-1497,H:2-965^88.751%ID^E:0^RecName: Full=Alpha-1,4 glucan phosphorylase L-1 isozyme, chloroplastic/amyloplastic;^Eukaryota; Viridiplantae; Streptophyta; Embryophyta; Tracheophyta; Spermatophyta; Magnoliopsida; eudicotyledons; Gunneridae; Pentapetalae; asterids; lamiids; Solanales; Solanaceae; Solanoideae; Solaneae; Solanum	-0.419953	0.550396	-0.323189	-0.661733	-0.513271	1.32693	1.26648	0.99984	0.781058	0.174239	0.641511	0.0236868	0.0104042	0.479824	-0.976555	-1.34162	-2.01805
1	Nsylvestris_NODE_12036_length_1865_cov_182	RL4_RHOCS^RL4_RHOCS^Q:582-1187,H:5-205^51.485%ID^E:4.82e-60^RecName: Full=50S ribosomal protein L4 {ECO:0000255|HAMAP-Rule:MF_01328};^Bacteria; Proteobacteria; Alphaproteobacteria; Rhodospirillales; Rhodospirillaceae; Rhodospirillum	0.295294	1.34774	0.0925715	0.760953	-0.269396	0.880409	0.775809	1.24272	0.439315	-0.171465	0.138558	-0.178576	-0.361688	-0.565712	-1.32389	-1.36559	-1.73705
1	Nsylvestris_NODE_12039_length_1865_cov_127	CAND8_ARATH^CAND8_ARATH^Q:181-846,H:26-251^59.735%ID^E:4.62e-80^RecName: Full=Protein CANDIDATE G-PROTEIN COUPLED RECEPTOR 8 {ECO:0000303|PubMed:18671868};^Eukaryota; Viridiplantae; Streptophyta; Embryophyta; Tracheophyta; Spermatophyta; Magnoliopsida; eudicotyledons; Gunneridae; Pentapetalae; rosids; malvids; Brassicales; Brassicaceae; Camelineae; Arabidopsis`CAND8_ARATH^CAND8_ARATH^Q:1582-1728,…	1.06821	1.4484	0.504827	1.18628	-0.199237	1.89408	2.24129	1.87482	1.15671	-0.048031	1.30229	0.57679	0.432844	0.176438	-4.67492	-4.26108	-4.67972
1	Nsylvestris_NODE_12040_length_1865_cov_104	CSPLV_ARATH^CSPLV_ARATH^Q:1068-1271,H:202-269^63.235%ID^E:1.17e-09^RecName: Full=CASP-like protein 4A1;^Eukaryota; Viridiplantae; Streptophyta; Embryophyta; Tracheophyta; Spermatophyta; Magnoliopsida; eudicotyledons; Gunneridae; Pentapetalae; rosids; malvids; Brassicales; Brassicaceae; Camelineae; Arabidopsis	-0.4552	0.363568	-0.0148114	0.0240685	-0.896437	1.84211	1.852	0.0570458	1.20305	0.0223997	0.210027	-0.728267	0.713044	0.086893	-1.10861	-1.43557	-1.73531
1	Nsylvestris_NODE_12045_length_1864_cov_210	C76BA_SWEMU^C76BA_SWEMU^Q:1659-325,H:48-491^49.103%ID^E:1.33e-158^RecName: Full=Geraniol 8-hydroxylase;^Eukaryota; Viridiplantae; Streptophyta; Embryophyta; Tracheophyta; Spermatophyta; Magnoliopsida; eudicotyledons; Gunneridae; Pentapetalae; asterids; lamiids; Gentianales; Gentianaceae; Gentianeae; Swertiinae; Swertia	0.392663	1.36516	-1.15909	-0.156432	-1.70986	1.76017	1.61207	1.57254	2.64388	0.735324	2.08097	-1.34642	1.03372	0.107488	-1.73741	-3.59738	-3.59738
1	Nsylvestris_NODE_12049_length_1864_cov_126	PANB2_ARATH^PANB2_ARATH^Q:352-1410,H:4-352^80.737%ID^E:0^RecName: Full=3-methyl-2-oxobutanoate hydroxymethyltransferase 2, mitochondrial;^Eukaryota; Viridiplantae; Streptophyta; Embryophyta; Tracheophyta; Spermatophyta; Magnoliopsida; eudicotyledons; Gunneridae; Pentapetalae; rosids; malvids; Brassicales; Brassicaceae; Camelineae; Arabidopsis	0.340922	1.03489	0.370889	0.486354	-0.220635	0.855978	1.27383	0.991841	0.383611	0.150231	0.0778552	0.0924707	-0.282811	-0.282811	-1.49728	-1.31164	-2.4637
1	Nsylvestris_NODE_1205_length_4701_cov_118	TF29_SCHPO^TF29_SCHPO^Q:2121-3233,H:437-820^35.233%ID^E:4.31e-97^RecName: Full=Transposon Tf2-9 polyprotein;^Eukaryota; Fungi; Dikarya; Ascomycota; Taphrinomycotina; Schizosaccharomycetes; Schizosaccharomycetales; Schizosaccharomycetaceae; Schizosaccharomyces`TF29_SCHPO^TF29_SCHPO^Q:3553-4455,H:941-1256^31.988%ID^E:4.31e-97^RecName: Full=Transposon Tf2-9 polyprotein;^Eukaryota; Fungi; Dikarya; As…	1.29254	1.48016	0.355273	0.226949	0.47311	1.65867	1.62723	1.93511	1.81749	0.0860864	1.16701	1.12261	1.16701	0.866773	-5.19932	-3.87739	-6.19932
1	Nsylvestris_NODE_12052_length_1864_cov_44	.	0.205071	1.55871	0.494578	-0.0262542	-0.642926	0.659637	1.89313	0.735586	0.942037	0.150624	0.09404	0.450184	0.257539	0.537647	-1.37989	-4.54982	-1.37989
1	Nsylvestris_NODE_12053_length_1864_cov_27	.	1.05541	0.833022	0.417985	-0.75194	-0.75194	1.56999	2.05541	0.833022	1.49599	-0.75194	0.569988	1.05541	1.05541	-0.430012	-2.75194	-2.75194	-2.75194
1	Nsylvestris_NODE_12057_length_1863_cov_140	TL203_ARATH^TL203_ARATH^Q:963-316,H:63-278^87.963%ID^E:2.05e-111^RecName: Full=Thylakoid lumenal protein TL20.3, chloroplastic {ECO:0000303|PubMed:20049866};^Eukaryota; Viridiplantae; Streptophyta; Embryophyta; Tracheophyta; Spermatophyta; Magnoliopsida; eudicotyledons; Gunneridae; Pentapetalae; rosids; malvids; Brassicales; Brassicaceae; Camelineae; Arabidopsis	0.264415	0.864528	0.215857	-0.332679	-0.113879	0.738461	1.27593	0.810812	0.537359	-0.0581139	0.725044	-0.350631	0.731437	0.620942	-2.12059	-1.56016	-2.24874
1	Nsylvestris_NODE_12065_length_1862_cov_19	.	0.589964	0.759889	-0.0881081	0.589964	2.0494	2.94752	0.589964	2.17493	0.911892	-1.41004	-0.825074	1.17493	-2.41004	0.174926	-2.41004	-2.41004	-2.41004
1	Nsylvestris_NODE_12069_length_1861_cov_195	RS1A_SYNY3^RS1A_SYNY3^Q:919-263,H:93-308^37.054%ID^E:4.64e-29^RecName: Full=30S ribosomal protein S1 homolog A;^Bacteria; Cyanobacteria; Synechococcales; Merismopediaceae; Synechocystis	0.339408	1.53243	0.383704	-0.0509822	0.413176	1.46679	1.97525	1.46482	1.50953	0.786981	1.4468	0.963827	0.746824	0.913578	-6.17031	-4.44214	-3.27969
1	Nsylvestris_NODE_1207_length_4698_cov_137	PP438_ARATH^PP438_ARATH^Q:2779-4239,H:34-520^63.19%ID^E:0^RecName: Full=Pentatricopeptide repeat-containing protein PNM1, mitochondrial;^Eukaryota; Viridiplantae; Streptophyta; Embryophyta; Tracheophyta; Spermatophyta; Magnoliopsida; eudicotyledons; Gunneridae; Pentapetalae; rosids; malvids; Brassicales; Brassicaceae; Camelineae; Arabidopsis	0.142486	1.11343	0.158368	0.236675	-0.215712	0.988838	1.58308	1.58131	0.750721	0.140795	0.403278	0.223612	0.299151	-0.086814	-2.28988	-2.23553	-2.79381
1	Nsylvestris_NODE_12073_length_1860_cov_234	WSD1_ARATH^WSD1_ARATH^Q:1629-154,H:1-470^37.398%ID^E:2.88e-115^RecName: Full=O-acyltransferase WSD1;^Eukaryota; Viridiplantae; Streptophyta; Embryophyta; Tracheophyta; Spermatophyta; Magnoliopsida; eudicotyledons; Gunneridae; Pentapetalae; rosids; malvids; Brassicales; Brassicaceae; Camelineae; Arabidopsis	0.232626	1.54211	0.418088	0.669049	-0.529699	1.41339	1.29676	1.46982	0.838825	0.188787	-0.0521109	0.400481	0.416061	0.508413	-3.22469	-3.2374	-2.35053
1	Nsylvestris_NODE_12079_length_1860_cov_200	PP13_TOBAC^PP13_TOBAC^Q:238-1149,H:1-304^96.711%ID^E:0^RecName: Full=Serine/threonine-protein phosphatase PP1 isozyme 3;^Eukaryota; Viridiplantae; Streptophyta; Embryophyta; Tracheophyta; Spermatophyta; Magnoliopsida; eudicotyledons; Gunneridae; Pentapetalae; asterids; lamiids; Solanales; Solanaceae; Nicotianoideae; Nicotianeae; Nicotiana	0.246586	0.991816	0.811007	1.46651	0.0298198	0.838056	1.21986	1.10305	0.651226	-0.206038	0.418507	-0.123785	0.012636	-0.184867	-2.60359	-2.83924	-1.83155
1	Nsylvestris_NODE_1208_length_4697_cov_223	CIP7_ARATH^CIP7_ARATH^Q:513-2690,H:1-687^31.266%ID^E:1.23e-68^RecName: Full=COP1-interacting protein 7 {ECO:0000303|PubMed:9668129};^Eukaryota; Viridiplantae; Streptophyta; Embryophyta; Tracheophyta; Spermatophyta; Magnoliopsida; eudicotyledons; Gunneridae; Pentapetalae; rosids; malvids; Brassicales; Brassicaceae; Camelineae; Arabidopsis	0.655235	1.8953	0.349589	0.546514	0.057093	1.61677	1.64479	1.59124	1.75166	0.479158	1.34641	0.905192	1.23783	0.896241	-5.2026	-4.39285	-5.37758
1	Nsylvestris_NODE_12083_length_1860_cov_55	.	-0.1152	0.842891	0.659256	0.216568	0.145608	1.15253	1.57536	1.61325	0.21035	-0.633232	-0.421285	0.221562	1.2699	-0.0664165	-2.34635	-2.21964	-2.10516
1	Nsylvestris_NODE_12091_length_1859_cov_26	SCGT_TOBAC^SCGT_TOBAC^Q:102-1613,H:6-469^25.862%ID^E:1.73e-45^RecName: Full=Scopoletin glucosyltransferase;^Eukaryota; Viridiplantae; Streptophyta; Embryophyta; Tracheophyta; Spermatophyta; Magnoliopsida; eudicotyledons; Gunneridae; Pentapetalae; asterids; lamiids; Solanales; Solanaceae; Nicotianoideae; Nicotianeae; Nicotiana	0.975043	0.208968	1.29517	0.555797	-2.02676	3.28576	3.39951	3.82898	0.295169	-2.02676	-0.441796	-2.02676	-2.02676	0.784712	-2.02676	-2.02676	-2.02676
1	Nsylvestris_NODE_12094_length_1858_cov_255	.	1.93668	2.57743	1.25551	1.3748	0.921087	-3.60248	-0.79512	-0.695585	3.62153	1.85696	2.90532	0.441919	1.44192	0.56745	-4.60248	-4.60248	-4.60248
1	Nsylvestris_NODE_12097_length_1858_cov_112	CLCC_ARATH^CLCC_ARATH^Q:255-839,H:8-196^67.677%ID^E:1.46e-68^RecName: Full=Chloride channel protein CLC-c;^Eukaryota; Viridiplantae; Streptophyta; Embryophyta; Tracheophyta; Spermatophyta; Magnoliopsida; eudicotyledons; Gunneridae; Pentapetalae; rosids; malvids; Brassicales; Brassicaceae; Camelineae; Arabidopsis	0.0381308	0.765924	0.00312291	0.718834	-0.484016	2.34664	2.71399	1.70988	2.44692	1.12079	1.93291	0.0590483	0.683942	0.262963	-5.14337	-5.14337	-4.03234
1	Nsylvestris_NODE_12098_length_1858_cov_102	HA22A_ARATH^HA22A_ARATH^Q:1856-1383,H:32-164^35.583%ID^E:7.97e-22^RecName: Full=HVA22-like protein a;^Eukaryota; Viridiplantae; Streptophyta; Embryophyta; Tracheophyta; Spermatophyta; Magnoliopsida; eudicotyledons; Gunneridae; Pentapetalae; rosids; malvids; Brassicales; Brassicaceae; Camelineae; Arabidopsis	0.438391	1.33153	0.515965	0.252886	0.290809	1.98151	2.23931	1.70546	1.42716	0.295448	0.828277	0.705653	0.849111	0.466773	-3.91439	-3.90018	-5.51371
1	Nsylvestris_NODE_121_length_8125_cov_153	TNPO1_ARATH^TNPO1_ARATH^Q:2904-5588,H:1-891^74.107%ID^E:0^RecName: Full=Transportin-1;^Eukaryota; Viridiplantae; Streptophyta; Embryophyta; Tracheophyta; Spermatophyta; Magnoliopsida; eudicotyledons; Gunneridae; Pentapetalae; rosids; malvids; Brassicales; Brassicaceae; Camelineae; Arabidopsis	0.337194	1.28179	0.637152	0.540125	-0.057389	1.1885	1.34637	1.03352	0.915303	-0.412695	0.714825	0.0579384	0.409025	0.0409544	-2.5315	-2.52333	-2.97779
1	Nsylvestris_NODE_1210_length_4696_cov_145	UPL7_ARATH^UPL7_ARATH^Q:4430-984,H:5-1142^58.767%ID^E:0^RecName: Full=E3 ubiquitin-protein ligase UPL7;^Eukaryota; Viridiplantae; Streptophyta; Embryophyta; Tracheophyta; Spermatophyta; Magnoliopsida; eudicotyledons; Gunneridae; Pentapetalae; rosids; malvids; Brassicales; Brassicaceae; Camelineae; Arabidopsis	0.104014	1.2611	-0.0963805	-0.00437424	0.271548	2.09715	1.77999	1.42325	1.19255	-0.0436126	0.68527	0.509511	0.76617	0.846026	-3.21721	-3.79275	-3.78224
1	Nsylvestris_NODE_12111_length_1856_cov_192	SECA2_ARATH^SECA2_ARATH^Q:2-1063,H:704-1057^76.271%ID^E:0^RecName: Full=Protein translocase subunit SECA2, chloroplastic {ECO:0000305};^Eukaryota; Viridiplantae; Streptophyta; Embryophyta; Tracheophyta; Spermatophyta; Magnoliopsida; eudicotyledons; Gunneridae; Pentapetalae; rosids; malvids; Brassicales; Brassicaceae; Camelineae; Arabidopsis	0.0125052	0.558806	0.200742	-0.256528	-0.659172	1.36558	1.40098	1.32163	1.12996	-0.349411	-0.207307	0.566022	0.507508	-0.00877911	-1.44288	-1.87802	-2.26163
1	Nsylvestris_NODE_12113_length_1856_cov_157	M2K2_ARATH^M2K2_ARATH^Q:287-1318,H:1-344^68.895%ID^E:6.45e-173^RecName: Full=Mitogen-activated protein kinase kinase 2;^Eukaryota; Viridiplantae; Streptophyta; Embryophyta; Tracheophyta; Spermatophyta; Magnoliopsida; eudicotyledons; Gunneridae; Pentapetalae; rosids; malvids; Brassicales; Brassicaceae; Camelineae; Arabidopsis	0.732975	1.68273	0.26265	1.15611	0.46358	1.83643	1.87018	1.4622	1.5576	-0.0852732	0.895576	0.0402577	1.03677	0.400409	-4.23962	-4.47268	-4.59991
1	Nsylvestris_NODE_12116_length_1856_cov_88	U496A_ARATH^U496A_ARATH^Q:630-1739,H:1-369^76.819%ID^E:4.04e-165^RecName: Full=UPF0496 protein At4g34320;^Eukaryota; Viridiplantae; Streptophyta; Embryophyta; Tracheophyta; Spermatophyta; Magnoliopsida; eudicotyledons; Gunneridae; Pentapetalae; rosids; malvids; Brassicales; Brassicaceae; Camelineae; Arabidopsis	-0.403558	1.01343	-1.04498	0.315833	0.459952	1.42744	1.29388	1.14188	1.99462	-0.266763	0.393287	1.82095	0.81928	0.155703	-3.61301	-3.61301	-1.89492
1	Nsylvestris_NODE_12118_length_1855_cov_231	MDHP_MEDSA^MDHP_MEDSA^Q:241-1521,H:11-437^84.579%ID^E:0^RecName: Full=Malate dehydrogenase [NADP], chloroplastic;^Eukaryota; Viridiplantae; Streptophyta; Embryophyta; Tracheophyta; Spermatophyta; Magnoliopsida; eudicotyledons; Gunneridae; Pentapetalae; rosids; fabids; Fabales; Fabaceae; Papilionoideae; 50 kb inversion clade; NPAAA clade; Hologalegina; IRL clade; Trifolieae; Medicago	-0.056651	0.845588	0.0810657	-0.289431	-0.00805694	1.1495	1.07671	0.835616	0.996991	0.136176	0.940938	0.282855	0.653154	0.29448	-2.20348	-2.49444	-2.24102
1	Nsylvestris_NODE_12119_length_1855_cov_228	BASS2_ARATH^BASS2_ARATH^Q:171-1403,H:1-409^78.708%ID^E:0^RecName: Full=Sodium/pyruvate cotransporter BASS2, chloroplastic;^Eukaryota; Viridiplantae; Streptophyta; Embryophyta; Tracheophyta; Spermatophyta; Magnoliopsida; eudicotyledons; Gunneridae; Pentapetalae; rosids; malvids; Brassicales; Brassicaceae; Camelineae; Arabidopsis	0.112741	0.719361	0.228819	0.285163	-0.00153611	1.32539	1.00967	1.00148	1.16114	-0.239632	0.892987	0.643574	0.870896	0.247975	-2.51119	-2.60218	-3.14466
1	Nsylvestris_NODE_12128_length_1855_cov_22	NU98B_ARATH^NU98B_ARATH^Q:678-1,H:651-889^41.633%ID^E:1.56e-37^RecName: Full=Nuclear pore complex protein NUP98B {ECO:0000303|PubMed:21189294};^Eukaryota; Viridiplantae; Streptophyta; Embryophyta; Tracheophyta; Spermatophyta; Magnoliopsida; eudicotyledons; Gunneridae; Pentapetalae; rosids; malvids; Brassicales; Brassicaceae; Camelineae; Arabidopsis	-0.688598	1.3114	0.311402	-0.688598	-0.688598	3.3114	2.21829	1.77083	-1.6886	-1.6886	-0.103636	-0.688598	-1.6886	-1.6886	-0.688598	1.48133	-0.103636
1	Nsylvestris_NODE_12130_length_1854_cov_225	DCDA1_ARATH^DCDA1_ARATH^Q:180-1616,H:3-484^81.687%ID^E:0^RecName: Full=Diaminopimelate decarboxylase 1, chloroplastic;^Eukaryota; Viridiplantae; Streptophyta; Embryophyta; Tracheophyta; Spermatophyta; Magnoliopsida; eudicotyledons; Gunneridae; Pentapetalae; rosids; malvids; Brassicales; Brassicaceae; Camelineae; Arabidopsis	0.592971	1.30659	0.370232	0.923266	-0.0111694	1.38382	1.30072	1.37983	0.630944	-0.446877	0.355738	0.186904	0.508805	-0.156945	-3.04258	-2.24092	-3.04134
1	Nsylvestris_NODE_12132_length_1854_cov_187	CRLK1_ARATH^CRLK1_ARATH^Q:1435-377,H:27-380^81.356%ID^E:0^RecName: Full=Calcium/calmodulin-regulated receptor-like kinase 1 {ECO:0000303|PubMed:21056039};^Eukaryota; Viridiplantae; Streptophyta; Embryophyta; Tracheophyta; Spermatophyta; Magnoliopsida; eudicotyledons; Gunneridae; Pentapetalae; rosids; malvids; Brassicales; Brassicaceae; Camelineae; Arabidopsis	0.100679	0.849493	0.638333	0.844689	-0.349406	1.22504	1.36043	1.31928	0.667211	-0.342019	0.416529	0.320034	0.100972	-0.457862	-1.91508	-2.01441	-2.76391
1	Nsylvestris_NODE_12136_length_1854_cov_101	TPSGD_VITVI^TPSGD_VITVI^Q:1718-93,H:19-556^58.118%ID^E:0^RecName: Full=(-)-germacrene D synthase;^Eukaryota; Viridiplantae; Streptophyta; Embryophyta; Tracheophyta; Spermatophyta; Magnoliopsida; eudicotyledons; Gunneridae; Pentapetalae; rosids; Vitales; Vitaceae; Viteae; Vitis	2.29656	2.39275	1.90826	2.8861	1.40138	0.960554	1.1532	1.18295	0.61263	0.471274	0.151394	-2.42816	-3.43176	-1.43176	-1.8468	-3.43176	-2.8468
1	Nsylvestris_NODE_12137_length_1854_cov_96	FBK50_ARATH^FBK50_ARATH^Q:1653-592,H:27-388^27.604%ID^E:1.53e-20^RecName: Full=F-box/kelch-repeat protein At3g06240;^Eukaryota; Viridiplantae; Streptophyta; Embryophyta; Tracheophyta; Spermatophyta; Magnoliopsida; eudicotyledons; Gunneridae; Pentapetalae; rosids; malvids; Brassicales; Brassicaceae; Camelineae; Arabidopsis	0.0911065	1.09261	-0.492653	0.311607	-1.32273	0.933611	0.551741	0.207786	0.648125	0.36483	0.141359	0.548677	1.23009	0.25956	-1.56476	-1.41712	-1.58384
1	Nsylvestris_NODE_12138_length_1854_cov_81	ADCK1_HUMAN^ADCK1_HUMAN^Q:1618-425,H:63-460^30.097%ID^E:1.15e-44^RecName: Full=Uncharacterized aarF domain-containing protein kinase 1;^Eukaryota; Metazoa; Chordata; Craniata; Vertebrata; Euteleostomi; Mammalia; Eutheria; Euarchontoglires; Primates; Haplorrhini; Catarrhini; Hominidae; Homo	0.552481	1.42253	0.306829	-0.207196	0.297681	0.44145	2.21621	1.06948	0.373878	-0.782254	0.575771	0.494667	0.281654	1.21877	-2.23557	-3.01798	-3.0084
1	Nsylvestris_NODE_12139_length_1854_cov_58	U496M_ARATH^U496M_ARATH^Q:1543-506,H:24-369^39.943%ID^E:1.22e-57^RecName: Full=UPF0496 protein At3g19330;^Eukaryota; Viridiplantae; Streptophyta; Embryophyta; Tracheophyta; Spermatophyta; Magnoliopsida; eudicotyledons; Gunneridae; Pentapetalae; rosids; malvids; Brassicales; Brassicaceae; Camelineae; Arabidopsis	1.05178	1.4935	1.10801	1.26128	-0.598966	1.08093	2.15493	1.58789	0.281903	-1.23343	0.461775	0.159252	0.244428	0.447712	-3.167	-3.167	-3.167
1	Nsylvestris_NODE_12140_length_1854_cov_18	.	0.534338	1.57605	0.21241	0.21241	-0.372553	0.534338	1.58164	1.08688	0.0868791	-0.0506245	1.4348	0.534338	-0.0506245	-0.202628	-2.37255	-2.37255	-2.37255
1	Nsylvestris_NODE_12142_length_1853_cov_218	RUVB2_XENLA^RUVB2_XENLA^Q:118-1482,H:3-456^76.264%ID^E:0^RecName: Full=RuvB-like 2;^Eukaryota; Metazoa; Chordata; Craniata; Vertebrata; Euteleostomi; Amphibia; Batrachia; Anura; Pipoidea; Pipidae; Xenopodinae; Xenopus; Xenopus	-0.114884	0.860923	-0.229094	0.161028	-0.58998	0.574764	1.01483	0.988035	0.911578	0.840575	0.603507	0.58148	-0.109012	-0.166644	-1.85048	-1.48643	-1.9902
1	Nsylvestris_NODE_12145_length_1853_cov_186	PILS5_ARATH^PILS5_ARATH^Q:1484-246,H:1-395^62.47%ID^E:0^RecName: Full=Protein PIN-LIKES 5 {ECO:0000303|PubMed:22504182};^Eukaryota; Viridiplantae; Streptophyta; Embryophyta; Tracheophyta; Spermatophyta; Magnoliopsida; eudicotyledons; Gunneridae; Pentapetalae; rosids; malvids; Brassicales; Brassicaceae; Camelineae; Arabidopsis	-1.11323	0.886773	1.05807	1.88677	1.2087	1.57127	3.52236	1.83431	1.9374	0.937399	0.886773	-0.598654	-0.335619	-2.92058	-2.92058	-3.92058	-3.92058
1	Nsylvestris_NODE_12148_length_1853_cov_98	.	0.213261	0.990869	0.360102	0.263887	0.312797	1.70969	1.8153	1.10635	1.43558	0.360102	0.727834	0.493369	1.18227	0.653834	-4.59409	-3.59409	-3.43705
1	Nsylvestris_NODE_12151_length_1852_cov_226	PEP_ARATH^PEP_ARATH^Q:199-1344,H:46-426^59.221%ID^E:5.87e-150^RecName: Full=RNA-binding KH domain-containing protein PEPPER {ECO:0000303|PubMed:16356489};^Eukaryota; Viridiplantae; Streptophyta; Embryophyta; Tracheophyta; Spermatophyta; Magnoliopsida; eudicotyledons; Gunneridae; Pentapetalae; rosids; malvids; Brassicales; Brassicaceae; Camelineae; Arabidopsis	0.507158	1.23465	-0.230331	0.66355	-0.30927	1.18371	1.17579	1.3303	0.753187	0.0811576	0.547077	0.317785	0.133124	-0.13053	-2.75959	-1.55562	-2.94214
1	Nsylvestris_NODE_12153_length_1852_cov_148	FB290_ARATH^FB290_ARATH^Q:1658-159,H:6-479^52.39%ID^E:3.17e-161^RecName: Full=F-box protein At5g51380;^Eukaryota; Viridiplantae; Streptophyta; Embryophyta; Tracheophyta; Spermatophyta; Magnoliopsida; eudicotyledons; Gunneridae; Pentapetalae; rosids; malvids; Brassicales; Brassicaceae; Camelineae; Arabidopsis	0.230461	1.18784	-0.221429	0.140865	-1.23497	1.50317	1.93025	1.37332	1.03165	0.39627	0.693802	0.237871	-1.42916e-05	0.231976	-2.2035	-2.67053	-2.62703
1	Nsylvestris_NODE_12154_length_1852_cov_138	ZMAT2_MOUSE^ZMAT2_MOUSE^Q:713-979,H:43-131^69.663%ID^E:2.45e-37^RecName: Full=Zinc finger matrin-type protein 2;^Eukaryota; Metazoa; Chordata; Craniata; Vertebrata; Euteleostomi; Mammalia; Eutheria; Euarchontoglires; Glires; Rodentia; Myomorpha; Muroidea; Muridae; Murinae; Mus; Mus	0.243952	1.83175	-0.0206691	0.408128	-0.160102	1.3715	1.94785	1.88723	1.37407	0.741814	1.0025	1.28908	1.0767	0.823942	-4.92733	-3.97696	-4.91346
1	Nsylvestris_NODE_12155_length_1852_cov_128	RID3_ARATH^RID3_ARATH^Q:92-1387,H:5-431^57.208%ID^E:9.84e-173^RecName: Full=Protein ROOT INITIATION DEFECTIVE 3;^Eukaryota; Viridiplantae; Streptophyta; Embryophyta; Tracheophyta; Spermatophyta; Magnoliopsida; eudicotyledons; Gunneridae; Pentapetalae; rosids; malvids; Brassicales; Brassicaceae; Camelineae; Arabidopsis	-0.156077	0.585933	0.140704	0.58782	-0.676196	1.24516	1.3151	1.59065	0.553854	0.273259	0.325012	-0.384659	0.325162	-0.860497	-1.31249	-2.10967	-1.44306
1	Nsylvestris_NODE_12156_length_1852_cov_124	CPRF1_PETCR^CPRF1_PETCR^Q:199-1467,H:1-410^51.62%ID^E:1.26e-131^RecName: Full=Common plant regulatory factor 1;^Eukaryota; Viridiplantae; Streptophyta; Embryophyta; Tracheophyta; Spermatophyta; Magnoliopsida; eudicotyledons; Gunneridae; Pentapetalae; asterids; campanulids; Apiales; Apiaceae; Apioideae; apioid superclade; Apieae; Petroselinum	-0.375046	-1.51255	0.557153	-0.249515	-2.24951	2.25299	3.23161	2.87977	-0.77443	-1.02712	-0.0260922	0.750485	1.33545	1.37537	-1.50679	-2.82728	-1.83448
1	Nsylvestris_NODE_12157_length_1852_cov_109	RL40_NICSY^RL40_NICSY^Q:111-494,H:1-128^99.219%ID^E:1.92e-84^RecName: Full=Ubiquitin-60S ribosomal protein L40;^Eukaryota; Viridiplantae; Streptophyta; Embryophyta; Tracheophyta; Spermatophyta; Magnoliopsida; eudicotyledons; Gunneridae; Pentapetalae; asterids; lamiids; Solanales; Solanaceae; Nicotianoideae; Nicotianeae; Nicotiana	0.335069	0.900228	0.10677	0.85155	-1.25348	0.556775	1.09983	1.1663	0.449257	0.731675	0.0254634	0.524495	0.00268528	0.654396	-1.83073	-2.14878	-2.1715
1	Nsylvestris_NODE_12161_length_1852_cov_30	.	0.862396	2.1063	0.456296	0.535349	-1.30753	-0.890073	0.61541	0.312507	1.72833	0.570018	1.30144	0.117159	0.949036	0.291885	-2.88284	-2.88284	-1.88284
1	Nsylvestris_NODE_12170_length_1851_cov_61	.	-0.297545	1.10455	0.354532	0.418034	0.753081	1.21703	1.67646	1.5972	1.25265	-0.1049	1.53896	1.10455	1.10455	0.59554	-4.1049	-4.1049	-4.1049
1	Nsylvestris_NODE_12174_length_1850_cov_160	.	0.531787	0.96653	-0.0681043	0.351498	-0.714498	1.5884	1.44811	1.58113	0.534337	-0.489329	0.437744	0.0571335	0.394074	0.0437431	-2.18605	-2.34343	-2.13309
1	Nsylvestris_NODE_12175_length_1850_cov_106	4ON1_ARATH^4ON1_ARATH^Q:555-127,H:102-244^49.65%ID^E:5.2e-37^RecName: Full=Protein At-4/1;^Eukaryota; Viridiplantae; Streptophyta; Embryophyta; Tracheophyta; Spermatophyta; Magnoliopsida; eudicotyledons; Gunneridae; Pentapetalae; rosids; malvids; Brassicales; Brassicaceae; Camelineae; Arabidopsis`4ON1_ARATH^4ON1_ARATH^Q:1659-1360,H:1-100^51%ID^E:8.45e-21^RecName: Full=Protein At-4/1;^Eukaryota; V…	0.356552	1.33912	-0.236107	-0.118037	0.0546617	2.76091	2.21748	1.98799	0.222903	-1.67583	-0.369054	0.283221	0.480474	0.09676	-1.62471	-2.75323	-3.0231
1	Nsylvestris_NODE_12176_length_1850_cov_90	MES12_ARATH^MES12_ARATH^Q:1454-393,H:1-349^70.423%ID^E:8.01e-171^RecName: Full=Putative methylesterase 12, chloroplastic;^Eukaryota; Viridiplantae; Streptophyta; Embryophyta; Tracheophyta; Spermatophyta; Magnoliopsida; eudicotyledons; Gunneridae; Pentapetalae; rosids; malvids; Brassicales; Brassicaceae; Camelineae; Arabidopsis	0.65195	1.09239	-0.398179	1.54748	0.0416344	1.81595	1.74843	2.04239	1.14	-0.0324061	1.02713	0.378828	0.623301	0.937697	-4.20553	-4.20553	-4.20553
1	Nsylvestris_NODE_12177_length_1850_cov_25	.	0.445706	1.77409	0.873625	-1.03327	-1.02966	1.61059	0.873625	0.77409	0.966735	-0.448303	0.426166	0.667174	1.77306	1.42617	-3.03327	-3.03327	-3.03327
1	Nsylvestris_NODE_12178_length_1849_cov_226	M2K2_ARATH^M2K2_ARATH^Q:1515-445,H:1-357^69.748%ID^E:7.75e-176^RecName: Full=Mitogen-activated protein kinase kinase 2;^Eukaryota; Viridiplantae; Streptophyta; Embryophyta; Tracheophyta; Spermatophyta; Magnoliopsida; eudicotyledons; Gunneridae; Pentapetalae; rosids; malvids; Brassicales; Brassicaceae; Camelineae; Arabidopsis	0.271545	0.431078	-0.297758	0.35745	0.101567	1.84691	1.38686	1.04124	0.441025	-0.672284	-0.0362815	0.122291	1.12239	-0.200699	-2.20531	-1.89719	-1.81284
1	Nsylvestris_NODE_12180_length_1849_cov_217	CIPKB_ARATH^CIPKB_ARATH^Q:1643-381,H:1-418^65.012%ID^E:0^RecName: Full=CBL-interacting serine/threonine-protein kinase 11;^Eukaryota; Viridiplantae; Streptophyta; Embryophyta; Tracheophyta; Spermatophyta; Magnoliopsida; eudicotyledons; Gunneridae; Pentapetalae; rosids; malvids; Brassicales; Brassicaceae; Camelineae; Arabidopsis	0.311665	3.67326	1.13954	-1.84937	1.83975	1.20226	0.568094	0.667522	2.19326	-4.59137	0.834891	1.36538	-0.470358	0.16298	-0.0778827	-3.54174	-3.42787
1	Nsylvestris_NODE_12186_length_1849_cov_97	DTX40_ARATH^DTX40_ARATH^Q:189-1616,H:27-502^68.277%ID^E:0^RecName: Full=Protein DETOXIFICATION 40 {ECO:0000303|PubMed:11739388};^Eukaryota; Viridiplantae; Streptophyta; Embryophyta; Tracheophyta; Spermatophyta; Magnoliopsida; eudicotyledons; Gunneridae; Pentapetalae; rosids; malvids; Brassicales; Brassicaceae; Camelineae; Arabidopsis	1.18982	1.93386	1.31334	0.976552	0.623804	0.0784946	0.171604	0.540838	2.10879	1.40937	1.54316	1.76973	1.57385	1.00685	-5.41336	-5.41336	-5.41336
1	Nsylvestris_NODE_12190_length_1849_cov_17	.	0.0451361	1.72321	-0.276792	0.530563	-2.27679	1.81067	1.18264	1.97114	0.723208	-0.276792	1.18264	0.723208	1.04514	-1.27679	-2.27679	-2.27679	-2.27679
1	Nsylvestris_NODE_12192_length_1848_cov_207	MBOA1_ARATH^MBOA1_ARATH^Q:134-1510,H:2-462^76.19%ID^E:0^RecName: Full=Lysophospholipid acyltransferase 1;^Eukaryota; Viridiplantae; Streptophyta; Embryophyta; Tracheophyta; Spermatophyta; Magnoliopsida; eudicotyledons; Gunneridae; Pentapetalae; rosids; malvids; Brassicales; Brassicaceae; Camelineae; Arabidopsis	0.501956	0.737496	0.389419	1.08807	-0.189094	1.58185	1.17894	1.33847	0.911106	-0.560827	0.49124	0.396366	0.679924	-0.45613	-2.88132	-2.25404	-2.95343
1	Nsylvestris_NODE_12194_length_1848_cov_200	CNBP_BOVIN^CNBP_BOVIN^Q:1196-711,H:6-165^34.066%ID^E:3.44e-15^RecName: Full=Cellular nucleic acid-binding protein;^Eukaryota; Metazoa; Chordata; Craniata; Vertebrata; Euteleostomi; Mammalia; Eutheria; Laurasiatheria; Cetartiodactyla; Ruminantia; Pecora; Bovidae; Bovinae; Bos`CNBP_BOVIN^CNBP_BOVIN^Q:1223-936,H:82-170^37.5%ID^E:4.99e-08^RecName: Full=Cellular nucleic acid-binding protein;^Eukaryota…	0.325041	1.24886	-0.257066	0.896824	-0.220102	0.664126	0.892565	0.922046	0.716735	-0.371419	0.0384202	0.60392	0.1879	-0.43749	-1.48942	-1.99529	-1.72564
1	Nsylvestris_NODE_12195_length_1848_cov_189	RDO2_ARATH^RDO2_ARATH^Q:351-1493,H:1-378^52.658%ID^E:1.69e-114^RecName: Full=Transcription elongation factor TFIIS {ECO:0000305};^Eukaryota; Viridiplantae; Streptophyta; Embryophyta; Tracheophyta; Spermatophyta; Magnoliopsida; eudicotyledons; Gunneridae; Pentapetalae; rosids; malvids; Brassicales; Brassicaceae; Camelineae; Arabidopsis	0.145718	0.970858	0.100795	1.14277	0.116811	1.27693	1.23751	0.876764	0.107804	-0.709582	0.194176	-0.341041	-0.611644	-0.802203	-1.12107	-0.784304	-1.80028
1	Nsylvestris_NODE_12196_length_1848_cov_188	PBL23_ARATH^PBL23_ARATH^Q:1537-470,H:1-361^74.515%ID^E:0^RecName: Full=Probable serine/threonine-protein kinase PBL23 {ECO:0000305};^Eukaryota; Viridiplantae; Streptophyta; Embryophyta; Tracheophyta; Spermatophyta; Magnoliopsida; eudicotyledons; Gunneridae; Pentapetalae; rosids; malvids; Brassicales; Brassicaceae; Camelineae; Arabidopsis	0.415115	4.11571	1.36372	0.192723	2.25162	0.60776	-0.39224	0.415115	2.00008	-2.39224	-0.39224	0.776081	-0.39224	-1.39224	-2.39224	-2.39224	-2.39224
1	Nsylvestris_NODE_1220_length_4683_cov_49	POLR2_ARATH^POLR2_ARATH^Q:2417-2091,H:1210-1318^41.284%ID^E:1.11e-36^RecName: Full=Retrovirus-related Pol polyprotein from transposon RE2;^Eukaryota; Viridiplantae; Streptophyta; Embryophyta; Tracheophyta; Spermatophyta; Magnoliopsida; eudicotyledons; Gunneridae; Pentapetalae; rosids; malvids; Brassicales; Brassicaceae; Camelineae; Arabidopsis`POLR2_ARATH^POLR2_ARATH^Q:2005-1757,H:1348-1430^43.37…	0.812638	1.9937	0.320214	1.20175	0.319831	0.43519	-0.530163	-0.704157	0.544305	-0.575833	0.584782	-0.0598324	0.14981	-0.999223	-0.900261	-1.22465	-1.3681
1	Nsylvestris_NODE_12200_length_1848_cov_104	PBL11_ARATH^PBL11_ARATH^Q:381-1610,H:1-387^65.366%ID^E:0^RecName: Full=Probable serine/threonine-protein kinase PBL11 {ECO:0000305};^Eukaryota; Viridiplantae; Streptophyta; Embryophyta; Tracheophyta; Spermatophyta; Magnoliopsida; eudicotyledons; Gunneridae; Pentapetalae; rosids; malvids; Brassicales; Brassicaceae; Camelineae; Arabidopsis	0.419815	1.35412	0.668855	1.26046	-2.03833	2.95359	2.22636	1.78393	1.3552	0.571457	0.681387	1.07016	0.605868	0.24511	-4.38599	-4.38599	-4.38599
1	Nsylvestris_NODE_12201_length_1848_cov_102	CSCL2_ARATH^CSCL2_ARATH^Q:906-487,H:606-745^69.286%ID^E:6.29e-48^RecName: Full=CSC1-like protein At4g02900;^Eukaryota; Viridiplantae; Streptophyta; Embryophyta; Tracheophyta; Spermatophyta; Magnoliopsida; eudicotyledons; Gunneridae; Pentapetalae; rosids; malvids; Brassicales; Brassicaceae; Camelineae; Arabidopsis	1.35888	4.72917	1.87187	-0.282509	2.05379	1.08928	-1.60268	-0.31908	1.51297	-2.31637	-0.0821779	1.20436	-0.512112	-2.10848	-0.245125	-4.31637	-2.03542
1	Nsylvestris_NODE_12203_length_1848_cov_63	.	0.019387	1.21194	-0.0278397	-0.445983	-0.73811	1.20049	2.05775	1.24171	1.18915	-0.192691	0.435372	0.613329	0.694849	-0.347932	-2.5689	-2.30634	-2.03619
1	Nsylvestris_NODE_12205_length_1848_cov_27	ABAH1_SOLLC^ABAH1_SOLLC^Q:119-1507,H:1-455^31.681%ID^E:5.61e-68^RecName: Full=Abscisic acid 8'-hydroxylase CYP707A1 {ECO:0000305};^Eukaryota; Viridiplantae; Streptophyta; Embryophyta; Tracheophyta; Spermatophyta; Magnoliopsida; eudicotyledons; Gunneridae; Pentapetalae; asterids; lamiids; Solanales; Solanaceae; Solanoideae; Solaneae; Solanum; Lycopersicon	0.61413	0.923964	0.94285	1.15208	0.852518	2.15208	1.40001	1.5444	0.322003	-0.847922	0.322003	-0.525994	0.959433	-1.26778	-2.84792	-2.84792	-2.84792
1	Nsylvestris_NODE_12211_length_1847_cov_208	PRS4A_ARATH^PRS4A_ARATH^Q:155-1486,H:1-443^95.281%ID^E:0^RecName: Full=26S proteasome regulatory subunit 4 homolog A;^Eukaryota; Viridiplantae; Streptophyta; Embryophyta; Tracheophyta; Spermatophyta; Magnoliopsida; eudicotyledons; Gunneridae; Pentapetalae; rosids; malvids; Brassicales; Brassicaceae; Camelineae; Arabidopsis	-0.209437	0.500217	-0.185482	0.0959104	-0.270007	1.42892	1.27237	1.51636	0.379171	-0.685768	0.174224	0.0239057	0.19642	-0.151834	-1.13552	-1.05861	-1.89085
1	Nsylvestris_NODE_12214_length_1847_cov_10	.	0.152115	1.23012	1.84017	0.996546	0.152115	0.889081	-0.432847	-0.210455	1.72635	-2.01781	1.15212	1.15212	0.98219	0.441622	-3.01781	-2.01781	-3.01781
1	Nsylvestris_NODE_12215_length_1846_cov_217	AMT11_SOLLC^AMT11_SOLLC^Q:54-1523,H:1-488^93.061%ID^E:0^RecName: Full=Ammonium transporter 1 member 1;^Eukaryota; Viridiplantae; Streptophyta; Embryophyta; Tracheophyta; Spermatophyta; Magnoliopsida; eudicotyledons; Gunneridae; Pentapetalae; asterids; lamiids; Solanales; Solanaceae; Solanoideae; Solaneae; Solanum; Lycopersicon	0.342452	1.9423	0.81696	0.506666	0.872967	1.59879	1.56484	2.05517	-0.24251	-0.514227	0.38042	0.872967	-0.827473	-0.521502	-2.77784	-3.82747	-2.24251
1	Nsylvestris_NODE_12216_length_1846_cov_214	EFTM_ARATH^EFTM_ARATH^Q:126-1436,H:10-454^84.787%ID^E:0^RecName: Full=Elongation factor Tu, mitochondrial;^Eukaryota; Viridiplantae; Streptophyta; Embryophyta; Tracheophyta; Spermatophyta; Magnoliopsida; eudicotyledons; Gunneridae; Pentapetalae; rosids; malvids; Brassicales; Brassicaceae; Camelineae; Arabidopsis	0.375932	1.1824	-0.243915	0.407008	-0.502776	0.960431	1.04827	1.20344	1.14375	0.408738	0.742725	0.420095	0.163011	-0.108796	-2.08403	-2.64498	-2.4713
1	Nsylvestris_NODE_12217_length_1846_cov_213	NIP51_ARATH^NIP51_ARATH^Q:1152-319,H:29-304^81.295%ID^E:3.45e-134^RecName: Full=Probable aquaporin NIP5-1;^Eukaryota; Viridiplantae; Streptophyta; Embryophyta; Tracheophyta; Spermatophyta; Magnoliopsida; eudicotyledons; Gunneridae; Pentapetalae; rosids; malvids; Brassicales; Brassicaceae; Camelineae; Arabidopsis	1.2905	1.34894	0.605659	0.704869	0.244845	1.12477	1.78895	2.1601	0.960594	0.601357	0.934871	0.243591	1.03903	0.0462417	-5.60165	-3.93717	-3.55551
1	Nsylvestris_NODE_12219_length_1846_cov_118	WSD1_ARATH^WSD1_ARATH^Q:1632-226,H:19-470^39.195%ID^E:2.92e-99^RecName: Full=O-acyltransferase WSD1;^Eukaryota; Viridiplantae; Streptophyta; Embryophyta; Tracheophyta; Spermatophyta; Magnoliopsida; eudicotyledons; Gunneridae; Pentapetalae; rosids; malvids; Brassicales; Brassicaceae; Camelineae; Arabidopsis	-0.969923	1.35201	0.030077	1.76704	-1.55489	3.22647	2.87138	2.80267	-0.121926	-2.55489	-0.969923	0.252469	0.767043	0.767043	-2.55489	-2.55489	-2.55489
1	Nsylvestris_NODE_12222_length_1845_cov_221	LRP6C_ARATH^LRP6C_ARATH^Q:1440-340,H:32-446^46.809%ID^E:7.68e-106^RecName: Full=La-related protein 6C;^Eukaryota; Viridiplantae; Streptophyta; Embryophyta; Tracheophyta; Spermatophyta; Magnoliopsida; eudicotyledons; Gunneridae; Pentapetalae; rosids; malvids; Brassicales; Brassicaceae; Camelineae; Arabidopsis	0.617174	3.55316	1.03196	-0.207594	2.10964	0.493955	-3.20759	-0.885666	1.42758	-1.61783	0.214639	1.21598	1.13439	-0.885666	-0.575326	-3.20759	-1.21121
1	Nsylvestris_NODE_12224_length_1845_cov_197	HDA9_ARATH^HDA9_ARATH^Q:170-1426,H:1-419^86.396%ID^E:0^RecName: Full=Histone deacetylase 9;^Eukaryota; Viridiplantae; Streptophyta; Embryophyta; Tracheophyta; Spermatophyta; Magnoliopsida; eudicotyledons; Gunneridae; Pentapetalae; rosids; malvids; Brassicales; Brassicaceae; Camelineae; Arabidopsis	0.861306	1.50269	0.406551	0.325963	-0.389391	1.10174	1.79003	1.64273	1.36858	0.489057	0.968752	1.40981	1.28602	1.58501	-4.05377	-4.83277	-5.46232
1	Nsylvestris_NODE_12227_length_1845_cov_112	C3H16_ARATH^C3H16_ARATH^Q:154-795,H:2-206^51.598%ID^E:2.7e-55^RecName: Full=Zinc finger CCCH domain-containing protein 16;^Eukaryota; Viridiplantae; Streptophyta; Embryophyta; Tracheophyta; Spermatophyta; Magnoliopsida; eudicotyledons; Gunneridae; Pentapetalae; rosids; malvids; Brassicales; Brassicaceae; Camelineae; Arabidopsis	0.123007	1.33207	0.0440069	0.765723	-0.523339	1.67161	1.45419	1.82173	0.658885	-0.561087	0.59814	-0.248847	0.472379	0.438286	-2.50031	-3.04614	-2.50031
1	Nsylvestris_NODE_12229_length_1844_cov_227	ILVH_NICPL^ILVH_NICPL^Q:365-1468,H:37-404^98.641%ID^E:0^RecName: Full=Acetolactate synthase small subunit 1, chloroplastic;^Eukaryota; Viridiplantae; Streptophyta; Embryophyta; Tracheophyta; Spermatophyta; Magnoliopsida; eudicotyledons; Gunneridae; Pentapetalae; asterids; lamiids; Solanales; Solanaceae; Nicotianoideae; Nicotianeae; Nicotiana`ILVH_NICPL^ILVH_NICPL^Q:1064-1534,H:37-194^48.125%ID^E:…	0.338794	0.957334	-0.0616276	0.717612	-0.480508	2.09271	1.40197	1.51435	0.957234	-0.177004	0.522594	0.292299	0.752147	0.178572	-2.8388	-2.30935	-3.85832
1	Nsylvestris_NODE_1223_length_4682_cov_43	YTX2_XENLA^YTX2_XENLA^Q:1966-1274,H:432-662^28.017%ID^E:7.36e-28^RecName: Full=Transposon TX1 uncharacterized 149 kDa protein;^Eukaryota; Metazoa; Chordata; Craniata; Vertebrata; Euteleostomi; Amphibia; Batrachia; Anura; Pipoidea; Pipidae; Xenopodinae; Xenopus; Xenopus`YTX2_XENLA^YTX2_XENLA^Q:2250-2017,H:337-417^25.926%ID^E:7.36e-28^RecName: Full=Transposon TX1 uncharacterized 149 kDa protein;^Eu…	0.36019	1.79315	-0.791813	-0.376775	0.208187	2.32366	1.32366	1.65297	1.87115	-0.502306	0.623225	0.992459	1.56182	0.845617	-3.96174	-3.96174	-3.96174
1	Nsylvestris_NODE_12230_length_1844_cov_182	SBH1_ARATH^SBH1_ARATH^Q:1239-493,H:5-253^79.518%ID^E:1.72e-137^RecName: Full=Sphinganine C4-monooxygenase 1;^Eukaryota; Viridiplantae; Streptophyta; Embryophyta; Tracheophyta; Spermatophyta; Magnoliopsida; eudicotyledons; Gunneridae; Pentapetalae; rosids; malvids; Brassicales; Brassicaceae; Camelineae; Arabidopsis	-0.192431	0.677243	0.0710991	0.708816	-0.635847	0.571772	1.14977	1.09907	0.543864	-0.117566	0.350376	0.184768	-0.173569	-0.168822	-0.953863	-1.20186	-1.91282
[truncated: 45,432 more rows]
