# Supplementary material for: Differential Gene Expression with an Emphasis on Floral Organ Size Differences in Natural and Synthetic Polyploids of Nicotiana tabacum (Solanaceae)
Source: Genes (Basel). 2020 Sep 19;11(9):1097. doi: 10.3390/genes11091097 (PMC7563459; doi:10.3390/genes11091097)
Supplement: Supplementary file 1 [file genes-11-01097-s001.zip › Supplemental Table S5.xlsx]

## Sheet: Sheet1
Subcluster	Contig	Annotation	QM2485A	QM2485B	QM2485C	QM2585A	QM2585B	QM2585C	Sylv85A	Sylv85B	Sylv85C	TAB09585A	TAB09585B	TAB09585C	TABC85A	TABC85B	TABC85C	Tom85B	Tom85C
1	Nsylvestris_NODE_1135_length_4772_cov_77	RFA1B_ARATH^RFA1B_ARATH^Q:4196-3594,H:329-534^24.638%ID^E:2.5e-06^RecName: Full=Replication protein A 70 kDa DNA-binding subunit B;^Eukaryota; Viridiplantae; Streptophyta; Embryophyta; Tracheophyta; Spermatophyta; Magnoliopsida; eudicotyledons; Gunneridae; Pentapetalae; rosids; malvids; Brassicales; Brassicaceae; Camelineae; Arabidopsis	1.94174	2.14961	1.2433	0.968116	1.098	1.42183	-2.55545	-3.81848	-3.14041	1.72996	2.01946	0.936407	-1.33305	0.181519	-0.118041	-1.44108	-1.28342
1	Nsylvestris_NODE_11743_length_1900_cov_162	R1A_SOLDE^R1A_SOLDE^Q:479-1900,H:410-859^31.884%ID^E:1.7e-64^RecName: Full=Late blight resistance protein R1-A;^Eukaryota; Viridiplantae; Streptophyta; Embryophyta; Tracheophyta; Spermatophyta; Magnoliopsida; eudicotyledons; Gunneridae; Pentapetalae; asterids; lamiids; Solanales; Solanaceae; Solanoideae; Solaneae; Solanum	2.12658	2.10489	1.25032	-0.547189	0.418046	1.01469	-4.93951	-4.93951	-4.93951	1.97936	1.50344	1.10489	2.09392	1.90598	1.78841	-1.93951	0.0146902
1	Nsylvestris_NODE_12480_length_1817_cov_202	E1313_ARATH^E1313_ARATH^Q:160-1527,H:21-456^40.83%ID^E:2.08e-113^RecName: Full=Glucan endo-1,3-beta-glucosidase 13;^Eukaryota; Viridiplantae; Streptophyta; Embryophyta; Tracheophyta; Spermatophyta; Magnoliopsida; eudicotyledons; Gunneridae; Pentapetalae; rosids; malvids; Brassicales; Brassicaceae; Camelineae; Arabidopsis	2.98524	0.526578	-0.966623	0.810595	0.384457	-0.342379	-1.79295	0.650393	-1.31762	0.370858	-0.306021	-0.133921	1.61784	0.146226	-0.232837	0.147785	-2.54762
1	Nsylvestris_NODE_12496_length_1816_cov_19	MYB83_ARATH^MYB83_ARATH^Q:1742-1350,H:1-135^81.481%ID^E:1.74e-68^RecName: Full=Transcription factor MYB83 {ECO:0000303|PubMed:11597504};^Eukaryota; Viridiplantae; Streptophyta; Embryophyta; Tracheophyta; Spermatophyta; Magnoliopsida; eudicotyledons; Gunneridae; Pentapetalae; rosids; malvids; Brassicales; Brassicaceae; Camelineae; Arabidopsis	-1.92484	1.38948	0.804514	0.621585	1.19792	1.23675	-1.78045	-1.26588	-1.52891	1.12185	0.434638	0.112636	0.286666	-0.587803	-0.603062	0.787294	-0.302401
1	Nsylvestris_NODE_12615_length_1804_cov_14	RIHA_CITK8^RIHA_CITK8^Q:1357-557,H:5-220^25.373%ID^E:4.77e-08^RecName: Full=Pyrimidine-specific ribonucleoside hydrolase RihA {ECO:0000255|HAMAP-Rule:MF_01431};^Bacteria; Proteobacteria; Gammaproteobacteria; Enterobacterales; Enterobacteriaceae; Citrobacter	1.49597	0.403509	-0.509077	-0.242675	-0.891797	-0.135482	-2.72165	-0.136684	-2.72165	0.687066	0.376807	-0.348694	1.17074	0.224149	-0.721646	1.53838	2.53272
1	Nsylvestris_NODE_12769_length_1790_cov_13	RLP7_ARATH^RLP7_ARATH^Q:84-1586,H:443-963^39.583%ID^E:7.02e-89^RecName: Full=Receptor-like protein 7 {ECO:0000303|PubMed:18434605};^Eukaryota; Viridiplantae; Streptophyta; Embryophyta; Tracheophyta; Spermatophyta; Magnoliopsida; eudicotyledons; Gunneridae; Pentapetalae; rosids; malvids; Brassicales; Brassicaceae; Camelineae; Arabidopsis`RLP7_ARATH^RLP7_ARATH^Q:216-1367,H:174-646^26.337%ID^E:5.84e…	0.306631	0.394094	-0.523444	-1.00407	-0.886014	-1.10841	0.628559	-0.233938	-1.10841	2.03455	-2.10841	-0.693369	1.55456	1.55456	1.95049	-0.233938	-0.523444
1	Nsylvestris_NODE_13233_length_1736_cov_18	SUC4_ARATH^SUC4_ARATH^Q:202-1575,H:52-505^72.174%ID^E:0^RecName: Full=Sucrose transport protein SUC4;^Eukaryota; Viridiplantae; Streptophyta; Embryophyta; Tracheophyta; Spermatophyta; Magnoliopsida; eudicotyledons; Gunneridae; Pentapetalae; rosids; malvids; Brassicales; Brassicaceae; Camelineae; Arabidopsis	0.861677	1.49206	-1.67847	-0.27564	-1.87498	-1.89367	-0.77338	-1.51035	-1.76762	0.545081	0.965604	0.834483	2.31917	0.440744	-0.597058	2.12502	0.787335
1	Nsylvestris_NODE_13763_length_1678_cov_9	Y3720_ARATH^Y3720_ARATH^Q:218-1501,H:38-452^27.394%ID^E:1.09e-31^RecName: Full=UPF0481 protein At3g47200;^Eukaryota; Viridiplantae; Streptophyta; Embryophyta; Tracheophyta; Spermatophyta; Magnoliopsida; eudicotyledons; Gunneridae; Pentapetalae; rosids; malvids; Brassicales; Brassicaceae; Camelineae; Arabidopsis	0.460447	0.803846	0.345016	-0.540108	-0.781116	0.15177	-4.24055	-2.24055	-3.24055	1.89038	1.18572	0.617433	2.26725	1.117	1.15177	-0.540108	1.59234
1	Nsylvestris_NODE_13958_length_1656_cov_14	HYES_RAT^HYES_RAT^Q:1519-590,H:235-547^31.077%ID^E:7.74e-35^RecName: Full=Bifunctional epoxide hydrolase 2;^Eukaryota; Metazoa; Chordata; Craniata; Vertebrata; Euteleostomi; Mammalia; Eutheria; Euarchontoglires; Glires; Rodentia; Myomorpha; Muroidea; Muridae; Murinae; Rattus	1.15712	1.29296	-1.02716	0.141965	-1.2198	-0.0720318	-1.2198	-1.4422	-3.02716	0.972841	1.4326	1.25824	2.27644	0.365159	1.25824	-1.70523	-0.442196
1	Nsylvestris_NODE_14223_length_1627_cov_10	LORF2_HUMAN^LORF2_HUMAN^Q:527-1204,H:451-682^26.724%ID^E:1.03e-18^RecName: Full=LINE-1 retrotransposable element ORF2 protein;^Eukaryota; Metazoa; Chordata; Craniata; Vertebrata; Euteleostomi; Mammalia; Eutheria; Euarchontoglires; Primates; Haplorrhini; Catarrhini; Hominidae; Homo	1.01608	0.799805	0.291099	-1.41475	-0.973983	-1.66523	-0.91509	0.465438	-1.4129	1.20954	1.01677	1.14967	2.0651	-0.495796	0.107036	0.13897	-1.38175
1	Nsylvestris_NODE_14953_length_1554_cov_222	WTR14_ARATH^WTR14_ARATH^Q:1400-363,H:3-340^58.382%ID^E:1.03e-119^RecName: Full=WAT1-related protein At2g39510;^Eukaryota; Viridiplantae; Streptophyta; Embryophyta; Tracheophyta; Spermatophyta; Magnoliopsida; eudicotyledons; Gunneridae; Pentapetalae; rosids; malvids; Brassicales; Brassicaceae; Camelineae; Arabidopsis	-0.101188	1.38381	0.122567	0.0589002	-1.08931	1.16977	-2.11316	0.208768	-1.69812	0.877794	-0.698123	-0.680201	1.28099	-0.0325029	0.245798	0.551322	0.512889
1	Nsylvestris_NODE_15305_length_1521_cov_30	TPPJ_ARATH^TPPJ_ARATH^Q:216-1274,H:1-368^67.209%ID^E:1.5e-175^RecName: Full=Probable trehalose-phosphate phosphatase J;^Eukaryota; Viridiplantae; Streptophyta; Embryophyta; Tracheophyta; Spermatophyta; Magnoliopsida; eudicotyledons; Gunneridae; Pentapetalae; rosids; malvids; Brassicales; Brassicaceae; Camelineae; Arabidopsis	0.778014	1.45609	-1.12888	0.678479	-0.321521	1.33056	-3.12888	-0.543914	-1.54391	-0.321521	0.571564	-0.543914	0.871124	0.571564	0.778014	0.456086	0.0410489
1	Nsylvestris_NODE_15982_length_1451_cov_15	FB135_ARATH^FB135_ARATH^Q:28-543,H:96-280^30.928%ID^E:5.85e-20^RecName: Full=F-box protein At3g07870;^Eukaryota; Viridiplantae; Streptophyta; Embryophyta; Tracheophyta; Spermatophyta; Magnoliopsida; eudicotyledons; Gunneridae; Pentapetalae; rosids; malvids; Brassicales; Brassicaceae; Camelineae; Arabidopsis`FB135_ARATH^FB135_ARATH^Q:611-865,H:296-385^33.333%ID^E:5.85e-20^RecName: Full=F-box prote…	0.163409	1.64884	0.163409	-0.158519	1.30091	0.163409	-2.15852	-2.15852	-2.15852	-2.15852	-0.573556	-0.573556	3.08941	1.84148	0.426444	-0.158519	1.30091
1	Nsylvestris_NODE_16179_length_1432_cov_22	.	0.169507	0.0673746	-0.498223	0.144644	0.498683	-0.73998	-0.451582	-3.30558	-0.986538	1.55489	1.0257	0.364583	1.60131	1.1486	0.961958	-0.533692	-1.02166
1	Nsylvestris_NODE_16198_length_1430_cov_26	APX3_ARATH^APX3_ARATH^Q:912-1301,H:135-263^54.135%ID^E:2.42e-23^RecName: Full=L-ascorbate peroxidase 3;^Eukaryota; Viridiplantae; Streptophyta; Embryophyta; Tracheophyta; Spermatophyta; Magnoliopsida; eudicotyledons; Gunneridae; Pentapetalae; rosids; malvids; Brassicales; Brassicaceae; Camelineae; Arabidopsis`APX3_ARATH^APX3_ARATH^Q:947-1102,H:147-198^69.231%ID^E:1.32e-12^RecName: Full=L-ascorbat…	0.50663	1.08358	-1.17519	-0.759255	-0.952802	-1.1163	-0.715763	-0.550703	-2.05861	0.558883	0.839607	0.832151	1.09782	0.662581	1.1281	-0.453457	1.07273
1	Nsylvestris_NODE_16299_length_1420_cov_20	ROMT_VITVI^ROMT_VITVI^Q:1339-281,H:10-357^66.289%ID^E:7.21e-175^RecName: Full=Trans-resveratrol di-O-methyltransferase;^Eukaryota; Viridiplantae; Streptophyta; Embryophyta; Tracheophyta; Spermatophyta; Magnoliopsida; eudicotyledons; Gunneridae; Pentapetalae; rosids; Vitales; Vitaceae; Viteae; Vitis	1.98262	2.66065	2.02474	1.04492	1.24923	0.967112	-9.88016	-8.88016	-9.88016	1.94638	1.1606	1.40864	1.38486	2.65213	2.70999	3.43818	4.01044
1	Nsylvestris_NODE_1637_length_4303_cov_87	.	0.974947	0.900364	-0.0913396	0.595803	-0.0319166	0.299506	-1.8899	-0.905328	-2.70302	1.14282	0.44121	0.644964	0.522019	0.618909	-0.116934	-0.47726	0.0751498
1	Nsylvestris_NODE_16399_length_1410_cov_11	POLG_PVCV1^POLG_PVCV1^Q:704-853,H:512-561^52%ID^E:5.28e-08^RecName: Full=Genome polyprotein;^Viruses; Ortervirales; Caulimoviridae; Petuvirus	1.26681	0.26681	-0.0957599	0.797325	0.418813	0.26681	-0.903115	-1.90311	-2.90311	0.418813	0.90424	1.09689	0.418813	0.0968852	-0.0957599	0.26681	-0.318152
1	Nsylvestris_NODE_16434_length_1406_cov_212	COMT1_CATRO^COMT1_CATRO^Q:1282-227,H:8-361^54.52%ID^E:1.77e-136^RecName: Full=Caffeic acid 3-O-methyltransferase;^Eukaryota; Viridiplantae; Streptophyta; Embryophyta; Tracheophyta; Spermatophyta; Magnoliopsida; eudicotyledons; Gunneridae; Pentapetalae; asterids; lamiids; Gentianales; Apocynaceae; Rauvolfioideae; Vinceae; Catharanthinae; Catharanthus	1.01985	0.946867	-0.0616068	0.238845	-0.684733	0.0960994	-1.57431	-1.36898	-0.66072	0.100993	0.409571	-0.0565574	1.75019	0.992395	0.993076	-1.2584	-0.882571
1	Nsylvestris_NODE_16751_length_1377_cov_22	CRPK1_ARATH^CRPK1_ARATH^Q:283-777,H:1-160^27.586%ID^E:1.04e-14^RecName: Full=Cold-responsive protein kinase 1 {ECO:0000303|PubMed:28344081};^Eukaryota; Viridiplantae; Streptophyta; Embryophyta; Tracheophyta; Spermatophyta; Magnoliopsida; eudicotyledons; Gunneridae; Pentapetalae; rosids; malvids; Brassicales; Brassicaceae; Camelineae; Arabidopsis`CRPK1_ARATH^CRPK1_ARATH^Q:797-1192,H:172-311^29.167…	0.645741	0.459514	-1.05693	-0.773681	-0.749423	-1.73531	-1.71228	-1.83781	-1.97531	1.08092	1.21293	1.00709	1.1457	0.701855	0.485428	1.96052	1.14105
1	Nsylvestris_NODE_16888_length_1366_cov_6	NET1D_ARATH^NET1D_ARATH^Q:1106-3,H:197-564^44.022%ID^E:3.57e-73^RecName: Full=Protein NETWORKED 1D {ECO:0000303|PubMed:22840520};^Eukaryota; Viridiplantae; Streptophyta; Embryophyta; Tracheophyta; Spermatophyta; Magnoliopsida; eudicotyledons; Gunneridae; Pentapetalae; rosids; malvids; Brassicales; Brassicaceae; Camelineae; Arabidopsis	2.21543	1.56335	1.2585	-1.244	0.171037	0.492965	-2.82896	-2.82896	-0.828963	0.492965	-0.244001	-0.507035	-0.0216084	1.41896	-2.82896	1.41896	2.30032
1	Nsylvestris_NODE_17077_length_1351_cov_14	GDL75_ARATH^GDL75_ARATH^Q:210-1211,H:46-382^37.574%ID^E:3.61e-73^RecName: Full=GDSL esterase/lipase At5g08460;^Eukaryota; Viridiplantae; Streptophyta; Embryophyta; Tracheophyta; Spermatophyta; Magnoliopsida; eudicotyledons; Gunneridae; Pentapetalae; rosids; malvids; Brassicales; Brassicaceae; Camelineae; Arabidopsis	1.14039	0.0953021	0.761878	-2.23812	0.761878	-2.23812	-0.238122	0.346841	-2.23812	0.933405	1.99914	1.48871	0.13483	-1.23812	-0.238122	0.346841	0.419518
1	Nsylvestris_NODE_17090_length_1350_cov_10	Y3475_ARATH^Y3475_ARATH^Q:74-1027,H:663-1000^42.012%ID^E:3.06e-65^RecName: Full=Probable LRR receptor-like serine/threonine-protein kinase At3g47570;^Eukaryota; Viridiplantae; Streptophyta; Embryophyta; Tracheophyta; Spermatophyta; Magnoliopsida; eudicotyledons; Gunneridae; Pentapetalae; rosids; malvids; Brassicales; Brassicaceae; Camelineae; Arabidopsis	0.768103	1.0555	0.372431	0.904055	-2.79749	-0.801105	-1.79749	-2.79749	-2.79749	2.42167	0.596197	1.26515	0.438233	1.25475	-0.793892	0.719782	1.9891
1	Nsylvestris_NODE_17244_length_1337_cov_21	U86A1_ARATH^U86A1_ARATH^Q:721-332,H:180-309^64.925%ID^E:9.97e-134^RecName: Full=UDP-glycosyltransferase 86A1;^Eukaryota; Viridiplantae; Streptophyta; Embryophyta; Tracheophyta; Spermatophyta; Magnoliopsida; eudicotyledons; Gunneridae; Pentapetalae; rosids; malvids; Brassicales; Brassicaceae; Camelineae; Arabidopsis`U86A1_ARATH^U86A1_ARATH^Q:1224-832,H:7-136^60.15%ID^E:9.97e-134^RecName: Full=UDP-…	1.55097	1.2178	0.0149168	0.0149168	-0.307011	0.0149168	-1.72205	-3.30701	-3.30701	1.01492	0.780452	0.599879	0.15242	1.15308	-0.985083	0.692989	2.42091
1	Nsylvestris_NODE_17477_length_1316_cov_27	AB7A_ARATH^AB7A_ARATH^Q:1162-2,H:1-380^53.728%ID^E:6.84e-123^RecName: Full=ABC transporter A family member 7;^Eukaryota; Viridiplantae; Streptophyta; Embryophyta; Tracheophyta; Spermatophyta; Magnoliopsida; eudicotyledons; Gunneridae; Pentapetalae; rosids; malvids; Brassicales; Brassicaceae; Camelineae; Arabidopsis	0.0743631	1.43209	0.0815946	-0.18144	0.956064	0.956064	-2.50337	-0.918405	-0.942653	-0.696013	-2.50337	-1.58498	1.15998	-0.138795	0.0815946	1.57644	3.15084
1	Nsylvestris_NODE_17548_length_1308_cov_105	MYB20_ARATH^MYB20_ARATH^Q:1186-764,H:1-141^81.56%ID^E:1.67e-82^RecName: Full=Transcription factor MYB20 {ECO:0000305};^Eukaryota; Viridiplantae; Streptophyta; Embryophyta; Tracheophyta; Spermatophyta; Magnoliopsida; eudicotyledons; Gunneridae; Pentapetalae; rosids; malvids; Brassicales; Brassicaceae; Camelineae; Arabidopsis	-0.503769	-0.314812	-0.457722	-0.805959	0.442714	0.752545	-1.98128	-0.87276	-2.65936	1.26854	1.63328	1.39358	1.75044	1.37067	1.52334	-1.37425	-1.1652
1	Nsylvestris_NODE_1868_length_4137_cov_64	UFC_ARATH^UFC_ARATH^Q:199-471,H:44-134^49.451%ID^E:2.98e-21^RecName: Full=Protein UPSTREAM OF FLC;^Eukaryota; Viridiplantae; Streptophyta; Embryophyta; Tracheophyta; Spermatophyta; Magnoliopsida; eudicotyledons; Gunneridae; Pentapetalae; rosids; malvids; Brassicales; Brassicaceae; Camelineae; Arabidopsis	-0.167697	0.101336	-2.75266	-0.0889351	-0.337622	-0.462825	-1.1677	-0.167697	-1.08666	1.24824	0.569269	1.01993	1.08864	1.36282	-0.552071	0.152306	1.24132
1	Nsylvestris_NODE_19389_length_1153_cov_63	MY111_ARATH^MY111_ARATH^Q:1069-92,H:1-335^40.947%ID^E:4.73e-64^RecName: Full=Transcription factor MYB111 {ECO:0000303|PubMed:11597504};^Eukaryota; Viridiplantae; Streptophyta; Embryophyta; Tracheophyta; Spermatophyta; Magnoliopsida; eudicotyledons; Gunneridae; Pentapetalae; rosids; malvids; Brassicales; Brassicaceae; Camelineae; Arabidopsis	0.839412	0.369927	0.0152619	-0.828013	-0.556165	0.0845245	-3.59355	-1.59355	-2.45604	0.825992	0.825992	1.19305	1.15061	-0.489211	-0.667548	2.35599	2.52332
1	Nsylvestris_NODE_19429_length_1150_cov_13	LAC12_ARATH^LAC12_ARATH^Q:3-1148,H:105-482^76.762%ID^E:0^RecName: Full=Laccase-12;^Eukaryota; Viridiplantae; Streptophyta; Embryophyta; Tracheophyta; Spermatophyta; Magnoliopsida; eudicotyledons; Gunneridae; Pentapetalae; rosids; malvids; Brassicales; Brassicaceae; Camelineae; Arabidopsis	-2.18827	-0.866601	-1.26773	-0.313083	1.16452	0.638796	-1.47908	-0.742119	-0.914029	1.73046	1.83585	0.922971	1.51971	0.11891	0.285035	0.336264	-0.781607
1	Nsylvestris_NODE_19900_length_1110_cov_66	DDPS6_ARATH^DDPS6_ARATH^Q:135-938,H:18-294^52.708%ID^E:2.51e-102^RecName: Full=Dehydrodolichyl diphosphate synthase 6;^Eukaryota; Viridiplantae; Streptophyta; Embryophyta; Tracheophyta; Spermatophyta; Magnoliopsida; eudicotyledons; Gunneridae; Pentapetalae; rosids; malvids; Brassicales; Brassicaceae; Camelineae; Arabidopsis	0.513996	1.02857	-2.29336	0.0285689	-1.29336	0.706641	-2.29336	-2.29336	-2.29336	0.291603	1.16607	1.40708	1.61353	-0.708397	-1.29336	3.09896	2.61353
1	Nsylvestris_NODE_19940_length_1107_cov_121	NHL1_ARATH^NHL1_ARATH^Q:159-782,H:2-209^60.476%ID^E:1.23e-75^RecName: Full=NDR1/HIN1-like protein 1 {ECO:0000303|Ref.1};^Eukaryota; Viridiplantae; Streptophyta; Embryophyta; Tracheophyta; Spermatophyta; Magnoliopsida; eudicotyledons; Gunneridae; Pentapetalae; rosids; malvids; Brassicales; Brassicaceae; Camelineae; Arabidopsis	-0.611837	0.228417	-0.542629	0.286156	0.543149	0.341492	-1.12227	-0.881382	-0.980256	0.537492	0.263489	0.042112	0.855542	0.085618	-0.279816	0.388687	0.846038
1	Nsylvestris_NODE_20282_length_1079_cov_125	RBS_LARLA^RBS_LARLA^Q:312-773,H:30-186^55.975%ID^E:9.96e-63^RecName: Full=Ribulose bisphosphate carboxylase small chain, chloroplastic;^Eukaryota; Viridiplantae; Streptophyta; Embryophyta; Tracheophyta; Spermatophyta; Pinidae; Pinales; Pinaceae; Larix	1.43657	1.27027	0.250554	-0.213849	-0.610739	-0.0418965	-1.28881	-2.30818	-4.51763	1.04842	1.10442	0.866074	1.59871	1.27679	0.696689	-0.73627	0.168871
1	Nsylvestris_NODE_20440_length_1069_cov_10	PME15_ARATH^PME15_ARATH^Q:186-1067,H:76-369^67.347%ID^E:1.25e-148^RecName: Full=Probable pectinesterase 15;^Eukaryota; Viridiplantae; Streptophyta; Embryophyta; Tracheophyta; Spermatophyta; Magnoliopsida; eudicotyledons; Gunneridae; Pentapetalae; rosids; malvids; Brassicales; Brassicaceae; Camelineae; Arabidopsis	1.68039	0.754389	-0.982577	-0.567539	0.754389	0.0174232	-2.56754	-2.56754	-2.56754	-0.567539	0.239816	0.432461	0.602386	0.891892	-1.56754	2.43246	3.58221
1	Nsylvestris_NODE_20494_length_1065_cov_22	TRNH_DATST^TRNH_DATST^Q:999-199,H:1-267^63.806%ID^E:2.07e-116^RecName: Full=Tropinone reductase homolog;^Eukaryota; Viridiplantae; Streptophyta; Embryophyta; Tracheophyta; Spermatophyta; Magnoliopsida; eudicotyledons; Gunneridae; Pentapetalae; asterids; lamiids; Solanales; Solanaceae; Solanoideae; Datureae; Datura	1.23337	1.96966	1.36156	0.787506	1.37506	2.16916	-4.85664	-3.27168	-4.85664	0.0502516	-0.769176	-0.686714	0.313286	0.272644	-0.949748	2.46529	3.39281
1	Nsylvestris_NODE_21042_length_1025_cov_146	.	-0.627277	-0.145226	-0.180146	-0.298089	-0.0954009	0.778512	-1.69472	-1.33215	-1.50207	0.288698	-0.0960813	0.650921	1.59911	0.548428	0.53179	1.1017	0.471997
1	Nsylvestris_NODE_21081_length_1023_cov_16	.	1.11625	0.78025	-0.75833	-0.0432932	-0.261595	-0.306477	-0.624165	-1.51169	-3.31905	0.246552	-0.367644	-0.113496	2.51498	0.428879	0.261703	0.400138	1.55698
1	Nsylvestris_NODE_21089_length_1023_cov_6	GDL79_ARATH^GDL79_ARATH^Q:118-1023,H:29-330^69.868%ID^E:4.91e-163^RecName: Full=GDSL esterase/lipase At5g33370;^Eukaryota; Viridiplantae; Streptophyta; Embryophyta; Tracheophyta; Spermatophyta; Magnoliopsida; eudicotyledons; Gunneridae; Pentapetalae; rosids; malvids; Brassicales; Brassicaceae; Camelineae; Arabidopsis	1.76023	1.02383	-1.75578	0.414143	1.03221	0.585255	-1.75578	-3.34074	-2.34074	0.981905	-0.170819	0.968869	0.681624	0.108157	-0.170819	0.0460669	1.9324
1	Nsylvestris_NODE_21224_length_1013_cov_5	REM9_ARATH^REM9_ARATH^Q:773-129,H:52-231^25.346%ID^E:1.03e-10^RecName: Full=B3 domain-containing protein REM9;^Eukaryota; Viridiplantae; Streptophyta; Embryophyta; Tracheophyta; Spermatophyta; Magnoliopsida; eudicotyledons; Gunneridae; Pentapetalae; rosids; malvids; Brassicales; Brassicaceae; Camelineae; Arabidopsis	2.12224	1.50075	-0.199692	0.38527	-0.199692	1.25974	-2.19969	-2.19969	-2.19969	-0.61473	-2.19969	0.122236	2.44416	-0.61473	3.08571	1.7072	-2.19969
1	Nsylvestris_NODE_21323_length_1005_cov_7	AT74_ARATH^AT74_ARATH^Q:146-928,H:8-272^53.208%ID^E:1.72e-91^RecName: Full=Phosphoglycerate mutase-like protein AT74 {ECO:0000305};^Eukaryota; Viridiplantae; Streptophyta; Embryophyta; Tracheophyta; Spermatophyta; Magnoliopsida; eudicotyledons; Gunneridae; Pentapetalae; rosids; malvids; Brassicales; Brassicaceae; Camelineae; Arabidopsis	1.02208	0.876435	-1.50843	0.641886	-0.0152033	-0.429672	-1.61946	-0.941393	-1.80389	0.0944073	0.824566	-1.0934	1.05879	1.03139	0.0220816	-0.0153931	1.85521
1	Nsylvestris_NODE_21655_length_981_cov_9	UBIQP_PEA^UBIQP_PEA^Q:1-864,H:94-381^100%ID^E:0^RecName: Full=Polyubiquitin;^Eukaryota; Viridiplantae; Streptophyta; Embryophyta; Tracheophyta; Spermatophyta; Magnoliopsida; eudicotyledons; Gunneridae; Pentapetalae; rosids; fabids; Fabales; Fabaceae; Papilionoideae; 50 kb inversion clade; NPAAA clade; Hologalegina; IRL clade; Fabeae; Pisum`UBIQP_PEA^UBIQP_PEA^Q:1-879,H:18-310^98.294%ID^E:0^RecNam…	3.72761	4.00382	0.881335	1.62069	1.55684	0.548563	-7.87929	-7.55736	-10.0298	1.73251	1.36928	1.19484	1.93705	1.93707	1.4679	1.70988	1.7791
1	Nsylvestris_NODE_22174_length_943_cov_207	CAR11_ARATH^CAR11_ARATH^Q:582-91,H:1-164^65.854%ID^E:1.51e-76^RecName: Full=Protein C2-DOMAIN ABA-RELATED 11 {ECO:0000305};^Eukaryota; Viridiplantae; Streptophyta; Embryophyta; Tracheophyta; Spermatophyta; Magnoliopsida; eudicotyledons; Gunneridae; Pentapetalae; rosids; malvids; Brassicales; Brassicaceae; Camelineae; Arabidopsis	2.29613	2.24854	0.575909	1.30942	0.624633	1.07661	-4.11953	-4.11953	-4.11953	0.860954	0.667068	0.817345	1.47949	0.569771	-0.169993	-0.967345	0.970055
1	Nsylvestris_NODE_22232_length_940_cov_53	MED13_ARATH^MED13_ARATH^Q:1-939,H:1421-1698^50.789%ID^E:4.58e-84^RecName: Full=Mediator of RNA polymerase II transcription subunit 13;^Eukaryota; Viridiplantae; Streptophyta; Embryophyta; Tracheophyta; Spermatophyta; Magnoliopsida; eudicotyledons; Gunneridae; Pentapetalae; rosids; malvids; Brassicales; Brassicaceae; Camelineae; Arabidopsis	2.2994	2.46931	0.258648	0.153781	0.597197	-0.239065	-4.31545	-4.31545	-4.31545	1.16707	0.389972	1.1145	0.969949	0.969579	0.339326	1.27581	1.18088
1	Nsylvestris_NODE_22641_length_913_cov_204	C82C4_ARATH^C82C4_ARATH^Q:20-667,H:305-523^52.968%ID^E:9.89e-79^RecName: Full=Xanthotoxin 5-hydroxylase CYP82C4 {ECO:0000305|PubMed:18291319};^Eukaryota; Viridiplantae; Streptophyta; Embryophyta; Tracheophyta; Spermatophyta; Magnoliopsida; eudicotyledons; Gunneridae; Pentapetalae; rosids; malvids; Brassicales; Brassicaceae; Camelineae; Arabidopsis	1.16776	0.766723	1.97211	0.7411	0.460812	2.14108	-3.35988	-1.77492	-4.35988	-0.615179	-0.64179	-0.462638	-0.669461	-0.827561	-0.869308	3.12519	3.20583
1	Nsylvestris_NODE_22664_length_911_cov_227	ABA4_ARATH^ABA4_ARATH^Q:769-215,H:37-220^62.162%ID^E:1.3e-73^RecName: Full=Protein ABA DEFICIENT 4, chloroplastic {ECO:0000303|PubMed:17470058};^Eukaryota; Viridiplantae; Streptophyta; Embryophyta; Tracheophyta; Spermatophyta; Magnoliopsida; eudicotyledons; Gunneridae; Pentapetalae; rosids; malvids; Brassicales; Brassicaceae; Camelineae; Arabidopsis	1.24542	1.27361	-0.58098	-0.499965	-1.28207	-0.754013	-3.42938	-2.42938	-3.75131	1.06823	0.409776	1.04674	1.76652	1.24407	0.787853	1.5512	2.33366
1	Nsylvestris_NODE_22781_length_904_cov_56	21KD_DAUCA^21KD_DAUCA^Q:777-286,H:28-191^60.366%ID^E:1.14e-72^RecName: Full=21 kDa protein;^Eukaryota; Viridiplantae; Streptophyta; Embryophyta; Tracheophyta; Spermatophyta; Magnoliopsida; eudicotyledons; Gunneridae; Pentapetalae; asterids; campanulids; Apiales; Apiaceae; Apioideae; Scandiceae; Daucinae; Daucus; Daucus sect. Daucus	-1.04244	-1.45748	-1.04244	-0.489079	-0.0533006	-2.05694	1.71245	-1.04244	-2.04244	2.16311	-0.749658	-1.04244	1.39918	0.28093	-0.262129	3.50415	2.22097
1	Nsylvestris_NODE_23225_length_877_cov_63	RTM1B_ARATH^RTM1B_ARATH^Q:771-319,H:19-168^38.312%ID^E:1.79e-26^RecName: Full=Inactive protein RESTRICTED TEV MOVEMENT 1;^Eukaryota; Viridiplantae; Streptophyta; Embryophyta; Tracheophyta; Spermatophyta; Magnoliopsida; eudicotyledons; Gunneridae; Pentapetalae; rosids; malvids; Brassicales; Brassicaceae; Camelineae; Arabidopsis	-1.65024	-0.650241	0.349759	0.934722	-1.65024	-1.65024	-0.0652784	-0.650241	-1.65024	1.67169	-0.650241	-1.65024	1.34976	0.349759	-0.0652784	2.51968	3.15711
1	Nsylvestris_NODE_23755_length_845_cov_47	.	2.23415	2.49023	2.05443	1.80974	1.37712	2.6711	-1.85246	-1.85246	-0.2627	-1.85246	-1.85246	-1.85246	-1.85246	0.713134	-1.85246	-0.852464	0.732499
1	Nsylvestris_NODE_24585_length_796_cov_56	CB2D_SOLLC^CB2D_SOLLC^Q:794-537,H:31-116^98.837%ID^E:9.73e-55^RecName: Full=Chlorophyll a-b binding protein 1D;^Eukaryota; Viridiplantae; Streptophyta; Embryophyta; Tracheophyta; Spermatophyta; Magnoliopsida; eudicotyledons; Gunneridae; Pentapetalae; asterids; lamiids; Solanales; Solanaceae; Solanoideae; Solaneae; Solanum; Lycopersicon	0.71317	0.659305	0.377338	-1.19693	-0.755412	-0.714913	-3.38204	-5.83094	-4.2508	2.0193	0.732213	1.07595	0.611667	0.412229	-0.0683301	3.89963	5.69857
1	Nsylvestris_NODE_24886_length_778_cov_29	.	0.394494	-1.02054	-1.28358	-1.02054	-0.435581	0.0949332	-1.28358	-0.020544	-1.28358	0.481956	0.564419	0.301384	1.94908	1.14938	0.301384	0.394494	0.716422
1	Nsylvestris_NODE_25379_length_750_cov_141	.	-0.0330218	0.246924	-0.162822	0.439474	-0.635561	0.227354	-4.0048	-2.7824	-3.58976	0.732711	0.639061	0.38523	1.79748	0.752761	1.57183	1.65864	2.75689
1	Nsylvestris_NODE_25801_length_728_cov_43	AB7A_ARATH^AB7A_ARATH^Q:726-1,H:649-890^83.471%ID^E:1.22e-145^RecName: Full=ABC transporter A family member 7;^Eukaryota; Viridiplantae; Streptophyta; Embryophyta; Tracheophyta; Spermatophyta; Magnoliopsida; eudicotyledons; Gunneridae; Pentapetalae; rosids; malvids; Brassicales; Brassicaceae; Camelineae; Arabidopsis	-0.218497	1.39365	0.671418	0.170583	-0.602989	0.719476	-3.02791	-2.02791	-1.44295	0.305512	-0.42384	-1.56324	1.1388	0.797874	0.687982	0.937411	2.48463
1	Nsylvestris_NODE_26491_length_696_cov_70	.	3.19513	2.7992	1.63874	2.45817	2.40926	2.7212	-2.44872	-2.44872	-2.44872	0.358632	0.551277	-1.44872	0.873205	-0.86376	-2.44872	-2.44872	-2.44872
1	Nsylvestris_NODE_26628_length_690_cov_38	.	-0.877531	-0.00306141	-0.689904	-0.725527	-0.555602	-0.347016	-0.588024	-0.959993	-1.72553	0.798035	1.17171	-0.116718	0.918329	0.895059	0.219331	1.19095	1.39549
1	Nsylvestris_NODE_26647_length_689_cov_87	OPF17_ARATH^OPF17_ARATH^Q:568-305,H:104-193^64.516%ID^E:6.13e-33^RecName: Full=Transcription repressor OFP17;^Eukaryota; Viridiplantae; Streptophyta; Embryophyta; Tracheophyta; Spermatophyta; Magnoliopsida; eudicotyledons; Gunneridae; Pentapetalae; rosids; malvids; Brassicales; Brassicaceae; Camelineae; Arabidopsis	-2.4005	0.017636	-0.885254	0.12867	0.851878	1.44081	-2.18292	-1.38452	-1.10541	1.39572	1.22846	0.60114	1.34712	0.396326	-0.0782094	0.381534	0.247526
1	Nsylvestris_NODE_26730_length_686_cov_12	SNAK2_SOLTU^SNAK2_SOLTU^Q:359-48,H:1-104^90.385%ID^E:3.99e-47^RecName: Full=Snakin-2;^Eukaryota; Viridiplantae; Streptophyta; Embryophyta; Tracheophyta; Spermatophyta; Magnoliopsida; eudicotyledons; Gunneridae; Pentapetalae; asterids; lamiids; Solanales; Solanaceae; Solanoideae; Solaneae; Solanum	-1.31908	-1.05244	-2.58082	0.876881	0.718392	0.248907	-1.06937	-0.797944	-2.10508	-0.268631	0.892578	-1.11509	0.285512	2.69732	0.637608	1.58612	2.36513
1	Nsylvestris_NODE_27467_length_652_cov_80	.	0.871542	-0.00816366	-1.19259	0.477263	0.435443	0.34798	-1.33009	0.0484199	-0.564557	0.34798	0.669908	0.102868	1.7403	0.254871	-0.482095	-0.65202	-1.06706
1	Nsylvestris_NODE_27673_length_643_cov_13	.	2.65586	2.94458	-0.377988	-1.31015	-5.42461	-1.43784	-5.87879	-5.87879	-5.87879	2.2349	2.00995	1.90126	2.64912	2.18266	1.4574	3.59073	4.5605
1	Nsylvestris_NODE_28085_length_625_cov_8	1MMP_ARATH^1MMP_ARATH^Q:570-70,H:29-196^43.275%ID^E:2.9e-42^RecName: Full=Metalloendoproteinase 1-MMP {ECO:0000303|PubMed:10574937};^Eukaryota; Viridiplantae; Streptophyta; Embryophyta; Tracheophyta; Spermatophyta; Magnoliopsida; eudicotyledons; Gunneridae; Pentapetalae; rosids; malvids; Brassicales; Brassicaceae; Camelineae; Arabidopsis	-1.2573	1.84223	2.08509	0.690229	2.00143	1.10527	-4.06466	-4.06466	-1.2573	0.793323	1.32766	0.25727	0.105267	-0.74273	-2.4797	2.63578	1.0228
1	Nsylvestris_NODE_28239_length_618_cov_5	AAE2_ARATH^AAE2_ARATH^Q:616-2,H:87-296^61.137%ID^E:3.57e-76^RecName: Full=Probable acyl-activating enzyme 2;^Eukaryota; Viridiplantae; Streptophyta; Embryophyta; Tracheophyta; Spermatophyta; Magnoliopsida; eudicotyledons; Gunneridae; Pentapetalae; rosids; malvids; Brassicales; Brassicaceae; Camelineae; Arabidopsis	0.384238	-0.423116	-0.838154	1.03632	-1.42312	-0.838154	-1.42312	-2.42312	-2.42312	0.746809	1.9692	1.66435	1.9692	0.576884	1.9692	-1.42312	0.898812
1	Nsylvestris_NODE_28642_length_600_cov_8	.	1.7537	1.9761	0.583778	2.16874	2.04321	1.58378	-2.41622	-2.41622	-2.41622	-0.0942936	0.168741	-2.41622	-0.416222	-0.831259	-2.41622	1.16874	1.9761
1	Nsylvestris_NODE_29056_length_581_cov_9	CHI1_TOBAC^CHI1_TOBAC^Q:2-580,H:99-291^100%ID^E:2.23e-141^RecName: Full=Endochitinase A;^Eukaryota; Viridiplantae; Streptophyta; Embryophyta; Tracheophyta; Spermatophyta; Magnoliopsida; eudicotyledons; Gunneridae; Pentapetalae; asterids; lamiids; Solanales; Solanaceae; Nicotianoideae; Nicotianeae; Nicotiana	3.67262	3.53465	0.613641	1.63136	1.1368	0.531921	-5.50052	-6.59252	-7.87348	1.5937	0.901772	0.882313	0.637921	1.33322	1.26346	0.754605	1.47852
1	Nsylvestris_NODE_29816_length_543_cov_14	.	3.25698	2.79722	1.25665	2.38218	1.11915	0.382185	-2.20278	-2.20278	-2.20278	0.604577	-1.20278	-1.20278	1.11915	1.11915	-2.20278	-2.20278	-0.617815
1	Nsylvestris_NODE_30152_length_513_cov_5	PP185_ARATH^PP185_ARATH^Q:511-2,H:262-431^58.824%ID^E:3.36e-65^RecName: Full=Pentatricopeptide repeat-containing protein At2g35030, mitochondrial;^Eukaryota; Viridiplantae; Streptophyta; Embryophyta; Tracheophyta; Spermatophyta; Magnoliopsida; eudicotyledons; Gunneridae; Pentapetalae; rosids; malvids; Brassicales; Brassicaceae; Camelineae; Arabidopsis`PP185_ARATH^PP185_ARATH^Q:511-5,H:107-264^33.…	0.132078	2.25919	1.47781	0.383224	0.57381	-2.42619	-0.841228	0.57381	-2.42619	0.387335	-2.42619	0.681498	0.895738	1.94048	-1.42619	0.0822386	0.158772
1	Nsylvestris_NODE_31798_length_403_cov_192	PSAL_SPIOL^PSAL_SPIOL^Q:157-402,H:11-88^67.47%ID^E:1.24e-29^RecName: Full=Photosystem I reaction center subunit XI, chloroplastic;^Eukaryota; Viridiplantae; Streptophyta; Embryophyta; Tracheophyta; Spermatophyta; Magnoliopsida; eudicotyledons; Gunneridae; Pentapetalae; Caryophyllales; Chenopodiaceae; Chenopodioideae; Anserineae; Spinacia	0.444978	0.737914	-1.07356	-1.3847	-1.40453	-0.939993	-0.335437	-1.34934	-2.41729	1.65349	1.28202	0.662832	0.500787	-0.266202	-0.567666	1.58933	2.86736
1	Nsylvestris_NODE_32690_length_364_cov_4	.	0.86128	0.86128	0.413821	0.954389	0.413821	1.27632	-3.04561	-3.04561	-1.46065	0.413821	-0.238256	1.20232	0.86128	-2.04561	-0.238256	1.95439	0.86128
1	Nsylvestris_NODE_34238_length_315_cov_3	.	-1.15734	1.31636	-0.185798	-0.918937	-0.527985	-1.51349	-1.51349	-1.51349	-1.51349	1.2584	-1.51349	0.404901	1.89251	3.08821	2.4295	1.48109	-1.51349
1	Nsylvestris_NODE_34255_length_314_cov_148	.	-0.356564	0.536521	-3.16392	-0.163919	-0.076456	-0.578956	-1.35656	0.536521	-0.704487	1.71872	1.39067	0.0840087	-0.163919	-0.578956	-0.163919	0.359643	2.68157
1	Nsylvestris_NODE_3456_length_3416_cov_15	.	0.948959	0.189967	0.0744896	-0.92551	-0.510473	1.01309	-2.51047	-2.51047	-3.51047	1.34751	0.0744896	0.489527	1.65945	1.81146	-0.0510413	1.01309	1.39642
1	Nsylvestris_NODE_34725_length_302_cov_4	.	-0.850001	-0.830892	-1.43496	-0.46411	-0.113036	-1.43496	-1.3509	-0.798049	-1.37146	1.18327	1.47193	2.56504	2.32366	0.892724	1.37239	-0.434964	-0.725673
1	Nsylvestris_NODE_35384_length_286_cov_44	.	-0.464769	1.78316	-2.46477	-0.142841	0.120193	-1.46477	-1.46477	0.535231	-0.142841	0.313439	0.857159	-1.46477	1.55493	1.52073	1.53523	0.847025	-1.45757
1	Nsylvestris_NODE_35663_length_280_cov_5	MO1_ARATH^MO1_ARATH^Q:274-23,H:269-359^58.065%ID^E:1.62e-26^RecName: Full=Monooxygenase 1 {ECO:0000303|PubMed:10216258};^Eukaryota; Viridiplantae; Streptophyta; Embryophyta; Tracheophyta; Spermatophyta; Magnoliopsida; eudicotyledons; Gunneridae; Pentapetalae; rosids; malvids; Brassicales; Brassicaceae; Camelineae; Arabidopsis	1.99523	0.823809	0.359708	0.0888316	-0.60171	0.550293	-0.864744	-2.44971	-2.44971	-0.471511	1.0071	-2.44971	1.70085	-1.47151	-0.159872	2.21591	2.17673
1	Nsylvestris_NODE_36255_length_267_cov_7	.	1.02177	0.436051	-0.8757	0.868876	0.113288	-0.0604958	-6.76274	-5.18259	-6.46408	2.06158	1.18288	1.60529	1.82038	2.15636	1.13263	2.09157	4.85493
1	Nsylvestris_NODE_3895_length_3270_cov_48	.	0.926177	0.609171	0.0208704	-0.537511	-1.05183	-0.87677	-1.62096	-1.06633	-0.619592	0.642825	0.401775	0.340933	0.449608	0.556505	0.527948	0.422831	0.874349
1	Nsylvestris_NODE_5276_length_2911_cov_43	SEC3A_ARATH^SEC3A_ARATH^Q:2864-210,H:1-885^82.187%ID^E:0^RecName: Full=Exocyst complex component SEC3A {ECO:0000303|PubMed:19895414};^Eukaryota; Viridiplantae; Streptophyta; Embryophyta; Tracheophyta; Spermatophyta; Magnoliopsida; eudicotyledons; Gunneridae; Pentapetalae; rosids; malvids; Brassicales; Brassicaceae; Camelineae; Arabidopsis	-0.821644	0.883058	0.716321	-3.20016	-3.20016	-0.268473	-2.20016	-2.20016	-0.392801	1.69126	1.06963	1.55793	1.88561	1.45634	-0.482068	0.999909	2.50555
1	Nsylvestris_NODE_6076_length_2743_cov_80	.	3.38932	2.8832	1.50405	2.73435	1.89107	2.6365	-2.19639	-2.22554	-2.19639	-3.19639	-3.19639	-3.19639	0.610964	0.7105	0.263041	-0.389036	-0.0264659
1	Nsylvestris_NODE_7191_length_2537_cov_45	PUR8_PSEAE^PUR8_PSEAE^Q:1519-2025,H:248-416^71.598%ID^E:3.5e-80^RecName: Full=Adenylosuccinate lyase;^Bacteria; Proteobacteria; Gammaproteobacteria; Pseudomonadales; Pseudomonadaceae; Pseudomonas`PUR8_PSEAE^PUR8_PSEAE^Q:561-893,H:63-173^54.054%ID^E:4.18e-37^RecName: Full=Adenylosuccinate lyase;^Bacteria; Proteobacteria; Gammaproteobacteria; Pseudomonadales; Pseudomonadaceae; Pseudomonas`PUR8_PSEA…	2.08562	1.87917	0.915699	1.29421	0.841698	0.593771	-3.40623	-1.40623	-1.82127	-1.40623	-3.40623	-3.40623	-2.40623	3.00316	1.72305	2.17873	2.74352
1	Nsylvestris_NODE_7210_length_2532_cov_151	LAX2_MEDTR^LAX2_MEDTR^Q:1942-548,H:1-467^86.141%ID^E:0^RecName: Full=Auxin transporter-like protein 2;^Eukaryota; Viridiplantae; Streptophyta; Embryophyta; Tracheophyta; Spermatophyta; Magnoliopsida; eudicotyledons; Gunneridae; Pentapetalae; rosids; fabids; Fabales; Fabaceae; Papilionoideae; 50 kb inversion clade; NPAAA clade; Hologalegina; IRL clade; Trifolieae; Medicago	0.660067	0.625723	-0.0287597	0.319827	-0.0963819	0.414978	-2.12589	-0.718231	-0.51178	0.487979	0.855964	0.307071	1.01329	-0.313495	-0.292689	0.793315	-1.39099
1	Nsylvestris_NODE_726_length_5395_cov_45	YI31B_YEAST^YI31B_YEAST^Q:3111-2131,H:583-906^42.202%ID^E:4.02e-116^RecName: Full=Transposon Ty3-I Gag-Pol polyprotein;^Eukaryota; Fungi; Dikarya; Ascomycota; Saccharomycotina; Saccharomycetes; Saccharomycetales; Saccharomycetaceae; Saccharomyces`YI31B_YEAST^YI31B_YEAST^Q:2134-518,H:910-1468^27.682%ID^E:4.02e-116^RecName: Full=Transposon Ty3-I Gag-Pol polyprotein;^Eukaryota; Fungi; Dikarya; Ascom…	2.61962	2.16276	1.42107	-0.4222	0.190776	0.490337	-4.50966	-3.50966	-4.50966	1.81226	1.71896	0.61962	1.9166	1.59152	1.61962	-1.70231	-1.50966
1	Nsylvestris_NODE_7850_length_2428_cov_33	PPP7L_ARATH^PPP7L_ARATH^Q:445-1488,H:84-435^27.136%ID^E:8.22e-13^RecName: Full=Serine/threonine-protein phosphatase 7 long form homolog;^Eukaryota; Viridiplantae; Streptophyta; Embryophyta; Tracheophyta; Spermatophyta; Magnoliopsida; eudicotyledons; Gunneridae; Pentapetalae; rosids; malvids; Brassicales; Brassicaceae; Camelineae; Arabidopsis	0.964156	-0.0358436	-1.35777	-0.0358436	-0.772809	-0.0358436	-2.35777	-1.35777	-2.35777	2.44339	1.62591	-0.0358436	-0.357772	2.43039	-0.357772	-0.772809	2.37178
1	Nsylvestris_NODE_83_length_8767_cov_72	MYO11_ARATH^MYO11_ARATH^Q:7790-8185,H:137-306^38.824%ID^E:4.7e-23^RecName: Full=Myosin-11;^Eukaryota; Viridiplantae; Streptophyta; Embryophyta; Tracheophyta; Spermatophyta; Magnoliopsida; eudicotyledons; Gunneridae; Pentapetalae; rosids; malvids; Brassicales; Brassicaceae; Camelineae; Arabidopsis`MYO11_ARATH^MYO11_ARATH^Q:8208-8261,H:315-332^66.667%ID^E:4.7e-23^RecName: Full=Myosin-11;^Eukaryota;…	2.52509	2.1393	1.17055	0.626232	-0.314874	0.467534	-2.95873	-0.710803	-2.6368	0.664785	-0.0844252	-0.539192	0.295259	0.625631	-0.499299	-0.203843	-0.566413
1	Nsylvestris_NODE_9040_length_2246_cov_53	.	0.528734	0.767557	-0.903651	-0.00922427	-1.48716	-0.554066	-1.21399	-0.841968	-0.982354	0.360918	0.376571	-0.831785	2.09076	1.70025	0.87234	-0.414904	0.541965
1	Nsylvestris_NODE_9434_length_2188_cov_52	AB9C_ARATH^AB9C_ARATH^Q:258-2186,H:76-719^59.476%ID^E:0^RecName: Full=ABC transporter C family member 9;^Eukaryota; Viridiplantae; Streptophyta; Embryophyta; Tracheophyta; Spermatophyta; Magnoliopsida; eudicotyledons; Gunneridae; Pentapetalae; rosids; malvids; Brassicales; Brassicaceae; Camelineae; Arabidopsis	0.221388	-0.740822	-0.980861	-2.49072	-1.0701	-1.74215	-1.17959	-0.871813	-1.17778	1.0875	-0.376625	0.559904	2.04988	1.7806	0.956438	1.53371	2.44104
1	Nsylvestris_NODE_9676_length_2156_cov_32	AAE6_ARATH^AAE6_ARATH^Q:1892-261,H:1-545^63.139%ID^E:0^RecName: Full=Probable acyl-activating enzyme 6;^Eukaryota; Viridiplantae; Streptophyta; Embryophyta; Tracheophyta; Spermatophyta; Magnoliopsida; eudicotyledons; Gunneridae; Pentapetalae; rosids; malvids; Brassicales; Brassicaceae; Camelineae; Arabidopsis	1.10088	0.0844894	-0.611834	-0.508741	-1.02687	-1.21697	-1.32233	-0.109334	-2.41253	1.00832	0.837849	0.262635	1.69937	0.522022	-0.652476	1.04691	1.29861
1	Ntome_NODE_1_length_16607_cov_83	MDN1_ARATH^MDN1_ARATH^Q:16501-212,H:1-5400^47.04%ID^E:0^RecName: Full=Midasin {ECO:0000303|PubMed:23572950};^Eukaryota; Viridiplantae; Streptophyta; Embryophyta; Tracheophyta; Spermatophyta; Magnoliopsida; eudicotyledons; Gunneridae; Pentapetalae; rosids; malvids; Brassicales; Brassicaceae; Camelineae; Arabidopsis	1.74537	1.60198	1.2284	-0.605531	-0.0887082	0.281376	-6.05079	-4.97355	-6.05079	1.47762	1.29092	0.922243	1.53221	1.68242	0.415506	2.57586	3.01546
1	Ntome_NODE_10_length_12625_cov_75	SCC4_ARATH^SCC4_ARATH^Q:12504-10660,H:5-621^62.723%ID^E:0^RecName: Full=Sister chromatid cohesion protein SCC4 {ECO:0000303|PubMed:28137757};^Eukaryota; Viridiplantae; Streptophyta; Embryophyta; Tracheophyta; Spermatophyta; Magnoliopsida; eudicotyledons; Gunneridae; Pentapetalae; rosids; malvids; Brassicales; Brassicaceae; Camelineae; Arabidopsis	1.21628	1.44189	-0.301748	-0.0480338	0.241504	0.0957751	-2.4041	-2.13903	-3.39332	0.493765	0.208512	0.0173819	0.549549	0.360002	0.315301	1.62927	1.717
1	Ntome_NODE_100_length_8532_cov_83	POL2_DROME^POL2_DROME^Q:1961-2674,H:433-661^35.146%ID^E:1.71e-57^RecName: Full=Retrovirus-related Pol polyprotein from transposon 297;^Eukaryota; Metazoa; Ecdysozoa; Arthropoda; Hexapoda; Insecta; Pterygota; Neoptera; Holometabola; Diptera; Brachycera; Muscomorpha; Ephydroidea; Drosophilidae; Drosophila; Sophophora`POL2_DROME^POL2_DROME^Q:1233-1952,H:204-429^27.083%ID^E:1.71e-57^RecName: Full=Ret…	1.83625	1.94741	0.191441	0.200257	0.537525	1.38875	-2.37713	-4.97407	-4.97407	0.681855	0.310593	0.59609	1.34008	0.238111	-0.0423863	1.4008	1.6985
1	Ntome_NODE_1000_length_5094_cov_57	RMI1_ARATH^RMI1_ARATH^Q:4254-4126,H:174-216^53.488%ID^E:1.07e-08^RecName: Full=RecQ-mediated genome instability protein 1;^Eukaryota; Viridiplantae; Streptophyta; Embryophyta; Tracheophyta; Spermatophyta; Magnoliopsida; eudicotyledons; Gunneridae; Pentapetalae; rosids; malvids; Brassicales; Brassicaceae; Camelineae; Arabidopsis`RMI1_ARATH^RMI1_ARATH^Q:4127-4050,H:216-241^53.846%ID^E:1.07e-08^RecN…	0.862086	-0.514898	-0.367801	-3.96115	-1.37139	-2.36661	-3.96115	-3.96115	-3.96115	2.22154	1.9479	2.05499	2.95747	2.83677	1.56992	2.71127	3.30338
1	Ntome_NODE_10000_length_2199_cov_161	SRK2A_ARATH^SRK2A_ARATH^Q:1760-1029,H:1-244^92.213%ID^E:1.42e-164^RecName: Full=Serine/threonine-protein kinase SRK2A;^Eukaryota; Viridiplantae; Streptophyta; Embryophyta; Tracheophyta; Spermatophyta; Magnoliopsida; eudicotyledons; Gunneridae; Pentapetalae; rosids; malvids; Brassicales; Brassicaceae; Camelineae; Arabidopsis	1.36932	0.972329	0.502258	-0.404323	0.0400798	0.488169	-3.25479	-3.80523	-4.15226	0.674015	0.682163	0.54461	1.30356	1.02537	0.489027	1.42032	2.10537
1	Ntome_NODE_10001_length_2199_cov_147	IDD5_ARATH^IDD5_ARATH^Q:459-1025,H:60-259^81.5%ID^E:5.73e-97^RecName: Full=Protein indeterminate-domain 5, chloroplastic {ECO:0000303|PubMed:16784536};^Eukaryota; Viridiplantae; Streptophyta; Embryophyta; Tracheophyta; Spermatophyta; Magnoliopsida; eudicotyledons; Gunneridae; Pentapetalae; rosids; malvids; Brassicales; Brassicaceae; Camelineae; Arabidopsis	1.21605	0.988341	0.346904	1.00324	0.781357	1.45169	-4.85523	-4.2679	-5.87671	1.54165	0.908054	0.613698	1.18085	0.354606	0.0383313	2.13642	2.43866
1	Ntome_NODE_10002_length_2199_cov_71	.	1.37149	0.905333	0.289119	-0.0275531	-0.31706	0.905333	-1.16506	-3.48698	-3.48698	-0.165057	-0.0275531	0.203432	1.46768	0.834943	1.21346	0.513015	0.972447
1	Ntome_NODE_10003_length_2199_cov_69	.	2.38659	2.00078	0.200648	0.321967	-0.43154	-0.165818	-3.97008	-3.97008	-3.97008	1.27823	0.887405	-0.0680046	1.54657	1.15425	0.423613	0.730916	1.64463
1	Ntome_NODE_10004_length_2199_cov_28	.	0.823471	0.951627	0.17402	-1.04837	0.53659	1.0671	-2.63334	-2.63334	-2.63334	0.826096	-0.633335	0.366665	0.951627	0.53659	-0.633335	1.61459	2.36666
1	Ntome_NODE_10005_length_2198_cov_295	RUB1_BRANA^RUB1_BRANA^Q:311-1942,H:1-544^83.088%ID^E:0^RecName: Full=RuBisCO large subunit-binding protein subunit alpha, chloroplastic;^Eukaryota; Viridiplantae; Streptophyta; Embryophyta; Tracheophyta; Spermatophyta; Magnoliopsida; eudicotyledons; Gunneridae; Pentapetalae; rosids; malvids; Brassicales; Brassicaceae; Brassiceae; Brassica	2.78103	2.28567	0.768756	0.617092	0.300792	0.166646	-8.02806	-6.37271	-5.81083	1.48651	1.74103	1.39684	1.753	1.16198	0.209339	2.2617	3.2812
1	Ntome_NODE_10006_length_2198_cov_291	KEG_ARATH^KEG_ARATH^Q:137-934,H:137-427^32.192%ID^E:4.96e-36^RecName: Full=E3 ubiquitin-protein ligase KEG;^Eukaryota; Viridiplantae; Streptophyta; Embryophyta; Tracheophyta; Spermatophyta; Magnoliopsida; eudicotyledons; Gunneridae; Pentapetalae; rosids; malvids; Brassicales; Brassicaceae; Camelineae; Arabidopsis	1.55517	1.60841	0.145878	-0.130693	-0.626589	-0.239829	-4.40253	-5.20322	-3.61604	0.876796	0.658999	1.19605	1.80631	1.03294	1.76065	2.07843	1.49927
1	Ntome_NODE_10007_length_2198_cov_281	ITPK3_ARATH^ITPK3_ARATH^Q:1578-676,H:39-343^75.41%ID^E:1.69e-128^RecName: Full=Inositol-tetrakisphosphate 1-kinase 3;^Eukaryota; Viridiplantae; Streptophyta; Embryophyta; Tracheophyta; Spermatophyta; Magnoliopsida; eudicotyledons; Gunneridae; Pentapetalae; rosids; malvids; Brassicales; Brassicaceae; Camelineae; Arabidopsis	0.974604	1.19107	0.807291	-0.834844	0.281084	-0.237554	-5.71847	-5.71847	-3.78112	1.47649	1.18457	0.746203	1.68216	1.42517	1.05527	3.17938	2.28716
1	Ntome_NODE_10008_length_2198_cov_275	SWT10_ARATH^SWT10_ARATH^Q:1052-1483,H:1-144^54.167%ID^E:1.04e-66^RecName: Full=Bidirectional sugar transporter SWEET10 {ECO:0000303|PubMed:21107422};^Eukaryota; Viridiplantae; Streptophyta; Embryophyta; Tracheophyta; Spermatophyta; Magnoliopsida; eudicotyledons; Gunneridae; Pentapetalae; rosids; malvids; Brassicales; Brassicaceae; Camelineae; Arabidopsis`SWT10_ARATH^SWT10_ARATH^Q:1476-1877,H:143-…	1.71232	1.14323	1.24077	0.308571	-0.187474	1.07264	-8.05543	-6.80447	-5.91793	1.16924	1.29002	1.41168	2.25491	1.41225	0.751955	3.17217	4.02554
1	Ntome_NODE_10009_length_2198_cov_159	MAN7_ARATH^MAN7_ARATH^Q:1005-1937,H:107-417^64.952%ID^E:7.08e-142^RecName: Full=Mannan endo-1,4-beta-mannosidase 7;^Eukaryota; Viridiplantae; Streptophyta; Embryophyta; Tracheophyta; Spermatophyta; Magnoliopsida; eudicotyledons; Gunneridae; Pentapetalae; rosids; malvids; Brassicales; Brassicaceae; Camelineae; Arabidopsis`MAN7_ARATH^MAN7_ARATH^Q:157-471,H:1-110^61.818%ID^E:1.36e-31^RecName: Full=M…	0.886356	0.681362	0.0403487	-0.0806234	-0.143499	-0.0209765	-4.60293	-2.30721	-3.01797	0.839018	1.3297	0.351731	1.58689	2.24281	0.920004	-0.0793683	1.37435
1	Ntome_NODE_1001_length_5089_cov_187	RH22_ORYSJ^RH22_ORYSJ^Q:3344-1872,H:76-572^63.855%ID^E:0^RecName: Full=DEAD-box ATP-dependent RNA helicase 22;^Eukaryota; Viridiplantae; Streptophyta; Embryophyta; Tracheophyta; Spermatophyta; Magnoliopsida; Liliopsida; Poales; Poaceae; BOP clade; Oryzoideae; Oryzeae; Oryzinae; Oryza; Oryza sativa	0.762831	0.788247	-0.961873	0.204348	-0.21868	0.178547	-3.91141	-2.15001	-2.11015	0.876781	0.366464	0.632729	1.02603	0.819517	0.523493	1.25229	1.92085
1	Ntome_NODE_10011_length_2199_cov_77	.	1.62076	1.3472	0.95954	0.148624	0.108294	0.666274	-4.06083	-3.06083	-4.06083	-0.636579	-0.893311	-0.823571	1.62609	1.49176	1.10729	2.24295	2.21716
1	Ntome_NODE_10012_length_2198_cov_35	TF29_SCHPO^TF29_SCHPO^Q:1-1698,H:676-1262^32.715%ID^E:1.31e-89^RecName: Full=Transposon Tf2-9 polyprotein;^Eukaryota; Fungi; Dikarya; Ascomycota; Taphrinomycotina; Schizosaccharomycetes; Schizosaccharomycetales; Schizosaccharomycetaceae; Schizosaccharomyces	1.44058	1.14902	-2.75161	-0.635578	-0.0182552	-1.75161	-1.42968	-0.764289	-2.16665	1.22475	0.295405	-0.0511698	0.773833	1.15239	0.293659	1.29453	1.94466
1	Ntome_NODE_10013_length_2197_cov_295	MA651_ARATH^MA651_ARATH^Q:1993-242,H:1-587^70.728%ID^E:0^RecName: Full=65-kDa microtubule-associated protein 1;^Eukaryota; Viridiplantae; Streptophyta; Embryophyta; Tracheophyta; Spermatophyta; Magnoliopsida; eudicotyledons; Gunneridae; Pentapetalae; rosids; malvids; Brassicales; Brassicaceae; Camelineae; Arabidopsis	2.28614	1.99947	0.954932	0.842461	0.420083	1.03296	-7.22702	-5.03482	-7.22702	1.53815	1.19669	0.862302	1.67978	1.07567	-0.429354	2.35168	3.67788
1	Ntome_NODE_10014_length_2197_cov_290	CLPX1_ARATH^CLPX1_ARATH^Q:235-1947,H:1-577^70.427%ID^E:0^RecName: Full=CLP protease regulatory subunit CLPX1, mitochondrial {ECO:0000303|PubMed:11299370};^Eukaryota; Viridiplantae; Streptophyta; Embryophyta; Tracheophyta; Spermatophyta; Magnoliopsida; eudicotyledons; Gunneridae; Pentapetalae; rosids; malvids; Brassicales; Brassicaceae; Camelineae; Arabidopsis	0.892056	1.09364	-0.995768	-0.0826597	-0.188829	0.198331	-2.15393	-1.14887	-4.13381	1.34577	1.23827	1.2645	1.69552	1.41405	1.37981	-0.830441	-0.987643
1	Ntome_NODE_10016_length_2197_cov_255	.	0.54822	0.876508	0.565097	0.122521	0.117289	0.791408	-4.3847	-3.53574	-6.70085	1.3812	0.82303	1.28483	1.8834	1.4911	0.751931	2.00288	1.98187
1	Ntome_NODE_10017_length_2197_cov_231	BAM3_ARATH^BAM3_ARATH^Q:135-1772,H:1-548^70.109%ID^E:0^RecName: Full=Beta-amylase 3, chloroplastic;^Eukaryota; Viridiplantae; Streptophyta; Embryophyta; Tracheophyta; Spermatophyta; Magnoliopsida; eudicotyledons; Gunneridae; Pentapetalae; rosids; malvids; Brassicales; Brassicaceae; Camelineae; Arabidopsis	1.10083	1.88723	-0.27965	-0.371472	-0.445145	-0.417198	-5.2846	-1.2481	-4.13404	2.05978	1.67575	0.248963	1.39586	-0.313287	1.07313	1.10686	1.94508
1	Ntome_NODE_10018_length_2197_cov_213	TBB1_SOLTU^TBB1_SOLTU^Q:2004-736,H:1-422^95.508%ID^E:0^RecName: Full=Tubulin beta-1 chain;^Eukaryota; Viridiplantae; Streptophyta; Embryophyta; Tracheophyta; Spermatophyta; Magnoliopsida; eudicotyledons; Gunneridae; Pentapetalae; asterids; lamiids; Solanales; Solanaceae; Solanoideae; Solaneae; Solanum	1.80826	2.01547	0.530583	1.83735	1.46749	1.21952	-3.8714	-6.20196	-3.26273	-0.0194638	0.823293	-0.951375	0.074167	-0.382034	-1.13975	2.28588	3.76669
1	Ntome_NODE_10019_length_2197_cov_195	CKX7_ARATH^CKX7_ARATH^Q:302-1840,H:1-523^63.671%ID^E:0^RecName: Full=Cytokinin dehydrogenase 7;^Eukaryota; Viridiplantae; Streptophyta; Embryophyta; Tracheophyta; Spermatophyta; Magnoliopsida; eudicotyledons; Gunneridae; Pentapetalae; rosids; malvids; Brassicales; Brassicaceae; Camelineae; Arabidopsis	2.57284	2.22566	0.722538	0.433031	-0.0739286	-0.514501	-4.32186	-4.32186	-4.32186	0.887207	1.17064	7.19688e-05	-0.151931	-0.0739286	1.51129	1.4595	2.79708
1	Ntome_NODE_1002_length_5088_cov_143	.	0.90369	1.05381	1.07309	0.235149	-0.0502928	0.25567	-6.87557	-4.54501	-4.85765	1.46245	0.622043	1.06071	1.95542	1.09102	1.06818	2.63016	2.91712
1	Ntome_NODE_10020_length_2197_cov_187	PUB27_ARATH^PUB27_ARATH^Q:1441-200,H:4-420^41.08%ID^E:4.2e-86^RecName: Full=U-box domain-containing protein 27;^Eukaryota; Viridiplantae; Streptophyta; Embryophyta; Tracheophyta; Spermatophyta; Magnoliopsida; eudicotyledons; Gunneridae; Pentapetalae; rosids; malvids; Brassicales; Brassicaceae; Camelineae; Arabidopsis	-0.235171	0.736504	0.00363311	-0.179626	-0.130078	0.0900938	-1.48214	-2.21773	-3.39711	1.07775	0.589509	0.0520588	1.21131	0.390207	0.523226	2.20057	0.767001
1	Ntome_NODE_10021_length_2197_cov_134	CNDH2_ARATH^CNDH2_ARATH^Q:120-1778,H:116-663^46.561%ID^E:5.93e-137^RecName: Full=Condensin-2 complex subunit H2;^Eukaryota; Viridiplantae; Streptophyta; Embryophyta; Tracheophyta; Spermatophyta; Magnoliopsida; eudicotyledons; Gunneridae; Pentapetalae; rosids; malvids; Brassicales; Brassicaceae; Camelineae; Arabidopsis	1.60372	1.66707	0.564259	0.601801	-0.1044	0.799986	-4.89517	-4.89517	-4.89517	1.09918	0.751566	0.122304	1.67847	1.29129	-0.194733	1.89495	2.91006
1	Ntome_NODE_10023_length_2198_cov_25	OFT11_ARATH^OFT11_ARATH^Q:281-1159,H:94-393^56.146%ID^E:6.1e-163^RecName: Full=O-fucosyltransferase 11 {ECO:0000305};^Eukaryota; Viridiplantae; Streptophyta; Embryophyta; Tracheophyta; Spermatophyta; Magnoliopsida; eudicotyledons; Gunneridae; Pentapetalae; rosids; malvids; Brassicales; Brassicaceae; Camelineae; Arabidopsis`OFT11_ARATH^OFT11_ARATH^Q:1192-1695,H:403-568^64.881%ID^E:6.1e-163^RecName…	1.10548	0.690335	-0.193251	-0.791997	-0.169067	-0.428209	-2.9949	-2.39672	-3.16383	1.08881	0.82436	0.722201	1.43143	1.02653	-0.46454	1.71003	2.00335
1	Ntome_NODE_10024_length_2196_cov_256	PPOM_TOBAC^PPOM_TOBAC^Q:363-1871,H:1-503^96.421%ID^E:0^RecName: Full=Protoporphyrinogen oxidase, mitochondrial;^Eukaryota; Viridiplantae; Streptophyta; Embryophyta; Tracheophyta; Spermatophyta; Magnoliopsida; eudicotyledons; Gunneridae; Pentapetalae; asterids; lamiids; Solanales; Solanaceae; Nicotianoideae; Nicotianeae; Nicotiana	2.32975	2.24249	0.402568	0.922624	0.561907	0.919793	-4.01204	-5.88782	-5.88782	0.692929	0.528176	-0.101223	1.01594	0.61107	0.506214	2.30516	2.85027
1	Ntome_NODE_10025_length_2196_cov_211	IQD1_ARATH^IQD1_ARATH^Q:308-1705,H:1-444^42.5%ID^E:1.23e-69^RecName: Full=Protein IQ-DOMAIN 1 {ECO:0000303|PubMed:15960618};^Eukaryota; Viridiplantae; Streptophyta; Embryophyta; Tracheophyta; Spermatophyta; Magnoliopsida; eudicotyledons; Gunneridae; Pentapetalae; rosids; malvids; Brassicales; Brassicaceae; Camelineae; Arabidopsis	1.49798	1.13919	-0.38032	1.15758	0.214094	0.334567	-4.96496	-3.89775	-4.37818	0.988704	1.38275	-0.276799	1.67869	0.982276	0.932706	1.02994	2.55955
1	Ntome_NODE_10026_length_2191_cov_91	FIP2_ARATH^FIP2_ARATH^Q:1455-1817,H:178-298^85.95%ID^E:4.26e-61^RecName: Full=FH protein interacting protein FIP2;^Eukaryota; Viridiplantae; Streptophyta; Embryophyta; Tracheophyta; Spermatophyta; Magnoliopsida; eudicotyledons; Gunneridae; Pentapetalae; rosids; malvids; Brassicales; Brassicaceae; Camelineae; Arabidopsis`FIP2_ARATH^FIP2_ARATH^Q:1497-1811,H:152-256^40.952%ID^E:5.06e-10^RecName: Ful…	2.04144	2.33382	-0.166397	-0.238029	-0.853772	-0.224518	-2.59697	-2.51372	-4.4223	0.944487	-0.217638	0.206806	1.05543	0.522276	0.359295	1.58579	2.184
1	Ntome_NODE_10027_length_2196_cov_87	RH17_ARATH^RH17_ARATH^Q:92-1579,H:23-518^66.466%ID^E:0^RecName: Full=DEAD-box ATP-dependent RNA helicase 17;^Eukaryota; Viridiplantae; Streptophyta; Embryophyta; Tracheophyta; Spermatophyta; Magnoliopsida; eudicotyledons; Gunneridae; Pentapetalae; rosids; malvids; Brassicales; Brassicaceae; Camelineae; Arabidopsis	1.50272	0.306452	-0.244663	-0.913564	-0.743393	0.177154	-1.64169	-1.23217	-1.53216	0.177675	0.244245	-0.0500151	0.725764	0.292111	-0.654598	1.26642	2.31971
1	Ntome_NODE_10029_length_2196_cov_77	LAML_ARATH^LAML_ARATH^Q:426-797,H:4-127^44.8%ID^E:3.41e-25^RecName: Full=Lamin-like protein;^Eukaryota; Viridiplantae; Streptophyta; Embryophyta; Tracheophyta; Spermatophyta; Magnoliopsida; eudicotyledons; Gunneridae; Pentapetalae; rosids; malvids; Brassicales; Brassicaceae; Camelineae; Arabidopsis	0.769551	1.19632	-1.711	0.25176	0.135984	0.177455	-2.8156	-2.41857	-2.22833	0.317434	0.409671	-0.440648	1.21254	0.659896	0.874143	1.0652	2.5442
1	Ntome_NODE_1003_length_5087_cov_221	GAI_SOLLC^GAI_SOLLC^Q:1917-283,H:33-588^80.496%ID^E:0^RecName: Full=DELLA protein GAI;^Eukaryota; Viridiplantae; Streptophyta; Embryophyta; Tracheophyta; Spermatophyta; Magnoliopsida; eudicotyledons; Gunneridae; Pentapetalae; asterids; lamiids; Solanales; Solanaceae; Solanoideae; Solaneae; Solanum; Lycopersicon	2.75245	2.45901	1.84982	1.56571	1.13612	1.56836	-4.87417	-5.24158	-7.73215	-0.0851934	-0.262669	-0.447764	0.766701	0.431854	-0.139616	2.72899	3.52411
1	Ntome_NODE_10030_length_2196_cov_24	YUC6_ARATH^YUC6_ARATH^Q:546-1769,H:1-408^72.573%ID^E:0^RecName: Full=Indole-3-pyruvate monooxygenase YUCCA6;^Eukaryota; Viridiplantae; Streptophyta; Embryophyta; Tracheophyta; Spermatophyta; Magnoliopsida; eudicotyledons; Gunneridae; Pentapetalae; rosids; malvids; Brassicales; Brassicaceae; Camelineae; Arabidopsis	1.44549	1.33056	0.643939	1.07204	0.333138	0.198488	-4.32507	-4.32507	-4.32507	0.426069	1.00369	-0.235067	1.79636	1.42821	0.569744	0.844851	2.1177
1	Ntome_NODE_10031_length_2195_cov_293	P2C53_ORYSJ^P2C53_ORYSJ^Q:647-3,H:113-330^66.667%ID^E:1.69e-94^RecName: Full=Protein phosphatase 2C 53 {ECO:0000305};^Eukaryota; Viridiplantae; Streptophyta; Embryophyta; Tracheophyta; Spermatophyta; Magnoliopsida; Liliopsida; Poales; Poaceae; BOP clade; Oryzoideae; Oryzeae; Oryzinae; Oryza; Oryza sativa	1.89363	1.55977	0.721771	0.34113	-0.200146	0.50749	-4.91861	-4.94663	-5.9752	0.65022	0.63863	0.674562	1.67154	1.58001	1.02739	2.0252	2.74925
1	Ntome_NODE_10032_length_2195_cov_268	IST1L_DICDI^IST1L_DICDI^Q:431-907,H:21-177^35.404%ID^E:5.97e-23^RecName: Full=IST1-like protein;^Eukaryota; Amoebozoa; Mycetozoa; Dictyostelids; Dictyosteliales; Dictyosteliaceae; Dictyostelium	1.08388	1.46077	-0.018562	0.256284	-0.24878	-0.0190671	-2.73781	-3.4962	-4.42097	1.30167	0.279247	0.313021	0.897144	0.406392	0.64871	2.0743	2.21997
1	Ntome_NODE_10033_length_2195_cov_233	LCYD1_ARATH^LCYD1_ARATH^Q:218-1537,H:6-451^64.955%ID^E:0^RecName: Full=L-cysteine desulfhydrase;^Eukaryota; Viridiplantae; Streptophyta; Embryophyta; Tracheophyta; Spermatophyta; Magnoliopsida; eudicotyledons; Gunneridae; Pentapetalae; rosids; malvids; Brassicales; Brassicaceae; Camelineae; Arabidopsis	1.79634	2.01797	0.432741	1.08353	0.214126	0.51888	-5.72086	-5.5703	-5.72086	1.18049	1.03883	0.791681	1.03362	1.04626	0.457255	2.16697	3.23333
1	Ntome_NODE_10034_length_2195_cov_218	.	1.36095	0.968629	0.311021	0.370727	0.0192548	0.370727	-5.83873	-4.83873	-5.83873	1.2698	0.819485	0.833699	2.28021	1.54498	1.62071	2.39489	2.3511
1	Ntome_NODE_10035_length_2195_cov_191	VA0D2_ARATH^VA0D2_ARATH^Q:194-1246,H:1-351^93.162%ID^E:0^RecName: Full=V-type proton ATPase subunit d2;^Eukaryota; Viridiplantae; Streptophyta; Embryophyta; Tracheophyta; Spermatophyta; Magnoliopsida; eudicotyledons; Gunneridae; Pentapetalae; rosids; malvids; Brassicales; Brassicaceae; Camelineae; Arabidopsis	1.55804	1.95596	0.33319	0.564019	0.11759	0.547251	-5.94521	-5.0385	-7.23094	1.82137	1.35948	1.25259	1.42566	1.42804	1.31563	1.72217	2.81366
1	Ntome_NODE_10036_length_2195_cov_133	MSTO1_HUMAN^MSTO1_HUMAN^Q:165-1181,H:6-349^31.653%ID^E:2.22e-38^RecName: Full=Protein misato homolog 1;^Eukaryota; Metazoa; Chordata; Craniata; Vertebrata; Euteleostomi; Mammalia; Eutheria; Euarchontoglires; Primates; Haplorrhini; Catarrhini; Hominidae; Homo	0.712943	0.860293	-1.42174	0.660998	0.013644	0.149187	-4.40724	-2.39289	-4.40724	1.55739	0.561309	0.920086	1.4815	0.908541	-0.089649	1.84068	3.05219
1	Ntome_NODE_10038_length_2195_cov_66	PP271_ARATH^PP271_ARATH^Q:490-1974,H:61-552^34.809%ID^E:5.94e-101^RecName: Full=Putative pentatricopeptide repeat-containing protein At3g49142;^Eukaryota; Viridiplantae; Streptophyta; Embryophyta; Tracheophyta; Spermatophyta; Magnoliopsida; eudicotyledons; Gunneridae; Pentapetalae; rosids; malvids; Brassicales; Brassicaceae; Camelineae; Arabidopsis	1.53902	1.21512	0.533465	-0.290679	0.199287	-0.734285	-3.53444	-3.48506	-3.499	0.542849	1.0376	0.253815	0.714238	1.19956	0.372924	1.84758	2.08801
1	Ntome_NODE_10039_length_2195_cov_41	.	1.86473	1.63387	0.298571	1.02253	0.832389	-0.961182	-5.60157	-5.60157	-5.60157	2.40658	1.96075	1.30568	1.27507	1.01755	0.146353	2.54812	1.45371
1	Ntome_NODE_1004_length_5085_cov_193	NHX7_ARATH^NHX7_ARATH^Q:102-2804,H:33-937^49.449%ID^E:0^RecName: Full=Sodium/hydrogen exchanger 7;^Eukaryota; Viridiplantae; Streptophyta; Embryophyta; Tracheophyta; Spermatophyta; Magnoliopsida; eudicotyledons; Gunneridae; Pentapetalae; rosids; malvids; Brassicales; Brassicaceae; Camelineae; Arabidopsis	1.76939	1.95739	0.595533	0.842226	0.175129	0.649414	-6.95621	-5.10421	-6.95621	1.33763	1.24282	0.815078	1.8408	1.20819	0.875411	2.49778	3.20985
1	Ntome_NODE_10040_length_2194_cov_213	WDS_ARATH^WDS_ARATH^Q:277-1809,H:1-515^66.019%ID^E:0^RecName: Full=WD repeat-containing protein WDS homolog {ECO:0000305};^Eukaryota; Viridiplantae; Streptophyta; Embryophyta; Tracheophyta; Spermatophyta; Magnoliopsida; eudicotyledons; Gunneridae; Pentapetalae; rosids; malvids; Brassicales; Brassicaceae; Camelineae; Arabidopsis	1.04805	1.33902	-0.334232	0.214324	-0.0212962	-0.714215	-4.6988	-4.6988	-4.6988	1.67693	1.26998	1.50283	1.18482	1.53597	0.842215	1.95182	2.60022
1	Ntome_NODE_10041_length_2194_cov_208	CAF2P_ARATH^CAF2P_ARATH^Q:1887-382,H:69-561^58.929%ID^E:0^RecName: Full=CRS2-associated factor 2, chloroplastic;^Eukaryota; Viridiplantae; Streptophyta; Embryophyta; Tracheophyta; Spermatophyta; Magnoliopsida; eudicotyledons; Gunneridae; Pentapetalae; rosids; malvids; Brassicales; Brassicaceae; Camelineae; Arabidopsis	0.833173	0.771447	-0.205119	-0.0771218	-0.0348606	0.336972	-4.42152	-5.47116	-5.47116	1.71144	1.7868	1.45306	2.08328	1.89552	0.922535	1.72852	2.1582
1	Ntome_NODE_10042_length_2194_cov_169	.	2.0683	1.84203	0.971499	0.845889	0.798307	0.748892	-5.70637	-6.26241	-5.48971	1.00893	0.863773	0.341465	1.03296	1.13791	0.72635	2.48459	2.58759
1	Ntome_NODE_10043_length_2194_cov_145	.	1.0967	2.16381	0.467793	0.0263092	0.611272	0.791844	-3.29562	-2.29562	-2.29562	0.0263092	-1.29562	-0.488264	0.950029	0.873504	-0.710656	1.34824	2.02559
1	Ntome_NODE_10044_length_2194_cov_137	HEXO1_ARATH^HEXO1_ARATH^Q:944-330,H:337-541^72.195%ID^E:3.9e-99^RecName: Full=Beta-hexosaminidase 1;^Eukaryota; Viridiplantae; Streptophyta; Embryophyta; Tracheophyta; Spermatophyta; Magnoliopsida; eudicotyledons; Gunneridae; Pentapetalae; rosids; malvids; Brassicales; Brassicaceae; Camelineae; Arabidopsis	2.02473	2.28958	-0.324425	0.925581	0.318809	0.189286	-5.28126	-4.45911	-5.21583	1.36334	0.643004	0.510073	0.721181	1.07539	0.969798	1.60522	2.64463
1	Ntome_NODE_10048_length_2194_cov_25	.	0.516309	-0.068653	1.0038	-1.06865	-0.388779	-0.220656	-1.80562	-1.06865	-2.39058	0.515347	0.309859	0.609419	0.931347	-0.390581	-0.583226	1.96697	2.13235
1	Ntome_NODE_10049_length_2193_cov_290	GPMA_METS4^GPMA_METS4^Q:857-1258,H:5-138^29.927%ID^E:8.52e-07^RecName: Full=2,3-bisphosphoglycerate-dependent phosphoglycerate mutase {ECO:0000255|HAMAP-Rule:MF_01039};^Bacteria; Proteobacteria; Alphaproteobacteria; Rhizobiales; Methylobacteriaceae; Methylobacterium	1.77679	1.36984	0.0498852	0.156201	-0.099981	0.460963	-3.39275	-3.41712	-3.87252	0.770408	0.121626	-0.0158715	1.15782	1.15526	0.477917	1.19118	2.11036
1	Ntome_NODE_1005_length_5084_cov_186	LAZ1_ARATH^LAZ1_ARATH^Q:3007-4392,H:21-485^75.161%ID^E:0^RecName: Full=Protein LAZ1 {ECO:0000303|PubMed:20830211};^Eukaryota; Viridiplantae; Streptophyta; Embryophyta; Tracheophyta; Spermatophyta; Magnoliopsida; eudicotyledons; Gunneridae; Pentapetalae; rosids; malvids; Brassicales; Brassicaceae; Camelineae; Arabidopsis	1.19784	1.45238	0.469779	-0.0450729	-0.10141	0.510236	-5.84257	-4.7276	-5.73059	1.61586	0.714215	1.03226	1.85522	1.47818	1.13023	2.23167	2.75935
1	Ntome_NODE_10050_length_2193_cov_278	ODP22_ARATH^ODP22_ARATH^Q:183-1793,H:2-539^68.421%ID^E:0^RecName: Full=Dihydrolipoyllysine-residue acetyltransferase component 2 of pyruvate dehydrogenase complex, mitochondrial;^Eukaryota; Viridiplantae; Streptophyta; Embryophyta; Tracheophyta; Spermatophyta; Magnoliopsida; eudicotyledons; Gunneridae; Pentapetalae; rosids; malvids; Brassicales; Brassicaceae; Camelineae; Arabidopsis	1.32841	1.25826	0.445197	0.317661	-0.256601	0.269212	-3.88474	-3.31245	-4.43233	0.856163	0.846699	0.570875	1.1902	0.884907	1.0198	1.36577	1.53297
1	Ntome_NODE_10051_length_2193_cov_276	KCS10_ARATH^KCS10_ARATH^Q:2007-409,H:4-550^72.232%ID^E:0^RecName: Full=3-ketoacyl-CoA synthase 10 {ECO:0000303|PubMed:18465198};^Eukaryota; Viridiplantae; Streptophyta; Embryophyta; Tracheophyta; Spermatophyta; Magnoliopsida; eudicotyledons; Gunneridae; Pentapetalae; rosids; malvids; Brassicales; Brassicaceae; Camelineae; Arabidopsis	2.3419	2.14602	0.643814	0.327807	0.107794	0.371825	-8.13066	-6.60035	-6.53934	1.71217	1.63743	0.986003	2.54234	1.97687	1.39466	1.97734	3.10439
1	Ntome_NODE_10052_length_2193_cov_229	SPXS1_DICDI^SPXS1_DICDI^Q:674-1645,H:431-757^35.398%ID^E:1.71e-39^RecName: Full=SPX and EXS domain-containing protein 1;^Eukaryota; Amoebozoa; Mycetozoa; Dictyostelids; Dictyosteliales; Dictyosteliaceae; Dictyostelium	1.54775	1.28838	-0.320935	0.216316	0.301871	0.0432652	-5.9107	-4.86107	-3.47774	1.39144	1.24725	0.77412	1.04884	1.19845	1.03732	1.85085	2.62458
1	Ntome_NODE_10053_length_2193_cov_207	YKIC_SCHPO^YKIC_SCHPO^Q:2001-919,H:1-346^27.446%ID^E:1.23e-34^RecName: Full=Uncharacterized protein C630.12;^Eukaryota; Fungi; Dikarya; Ascomycota; Taphrinomycotina; Schizosaccharomycetes; Schizosaccharomycetales; Schizosaccharomycetaceae; Schizosaccharomyces	1.83878	2.01626	0.409294	0.655397	0.127821	0.721674	-6.06871	-4.34624	-6.06871	1.10002	0.782667	0.771	1.22692	1.53751	0.632703	1.74507	2.91853
1	Ntome_NODE_10054_length_2192_cov_292	PMEU1_SOLLC^PMEU1_SOLLC^Q:85-1851,H:1-583^85.908%ID^E:0^RecName: Full=Pectinesterase/pectinesterase inhibitor U1;^Eukaryota; Viridiplantae; Streptophyta; Embryophyta; Tracheophyta; Spermatophyta; Magnoliopsida; eudicotyledons; Gunneridae; Pentapetalae; asterids; lamiids; Solanales; Solanaceae; Solanoideae; Solaneae; Solanum; Lycopersicon	0.547114	0.404437	-0.557893	0.861319	0.580646	0.44664	-2.2236	-1.99945	-4.05351	0.975447	1.41097	0.523919	0.122193	-0.301611	-0.131605	1.3424	2.05258
1	Ntome_NODE_10055_length_2192_cov_217	IQD1_ARATH^IQD1_ARATH^Q:1361-327,H:98-448^47.123%ID^E:5.75e-68^RecName: Full=Protein IQ-DOMAIN 1 {ECO:0000303|PubMed:15960618};^Eukaryota; Viridiplantae; Streptophyta; Embryophyta; Tracheophyta; Spermatophyta; Magnoliopsida; eudicotyledons; Gunneridae; Pentapetalae; rosids; malvids; Brassicales; Brassicaceae; Camelineae; Arabidopsis	1.59192	1.50245	-0.0215529	0.421507	-0.0400724	0.207113	-2.82087	-1.64922	-2.83419	0.22564	0.20821	-0.576147	0.436441	0.376418	0.00711311	1.06144	1.9038
1	Ntome_NODE_10056_length_2192_cov_188	PSB4_ARATH^PSB4_ARATH^Q:189-890,H:13-246^82.051%ID^E:8.7e-141^RecName: Full=Proteasome subunit beta type-4;^Eukaryota; Viridiplantae; Streptophyta; Embryophyta; Tracheophyta; Spermatophyta; Magnoliopsida; eudicotyledons; Gunneridae; Pentapetalae; rosids; malvids; Brassicales; Brassicaceae; Camelineae; Arabidopsis	1.0227	0.732659	-0.570151	0.527288	-0.0755366	1.01692	-3.12749	-5.15436	-4.86239	0.886359	0.787626	0.885013	1.87187	0.961717	0.841595	1.78509	2.47108
1	Ntome_NODE_10057_length_2192_cov_157	.	2.13778	2.03056	0.595443	1.03844	0.59081	0.929158	-5.90361	-4.77928	-5.90361	1.02263	1.22382	0.171071	1.45772	1.50841	0.89094	0.948393	2.04131
1	Ntome_NODE_10058_length_2192_cov_85	YTX2_XENLA^YTX2_XENLA^Q:230-1141,H:405-702^28.296%ID^E:3.13e-30^RecName: Full=Transposon TX1 uncharacterized 149 kDa protein;^Eukaryota; Metazoa; Chordata; Craniata; Vertebrata; Euteleostomi; Amphibia; Batrachia; Anura; Pipoidea; Pipidae; Xenopodinae; Xenopus; Xenopus	0.595073	1.0544	0.535025	-1.04994	-0.740179	-0.847676	-2.56451	-1.32398	-2.57278	0.913167	0.694224	0.15201	1.70548	0.897729	0.837783	0.486116	1.22805
1	Ntome_NODE_10059_length_2191_cov_300	TPP2_ARATH^TPP2_ARATH^Q:1821-670,H:1-367^55.867%ID^E:2.6e-131^RecName: Full=Probable thylakoidal processing peptidase 2, chloroplastic;^Eukaryota; Viridiplantae; Streptophyta; Embryophyta; Tracheophyta; Spermatophyta; Magnoliopsida; eudicotyledons; Gunneridae; Pentapetalae; rosids; malvids; Brassicales; Brassicaceae; Camelineae; Arabidopsis	2.15616	1.85678	0.67533	0.641792	-0.0869357	0.744074	-5.05513	-4.18416	-7.22505	1.12611	0.760276	0.905259	1.4639	0.962397	0.833696	1.81934	2.60617
1	Ntome_NODE_1006_length_5083_cov_217	COMT1_CAPAN^COMT1_CAPAN^Q:3712-4782,H:3-359^92.437%ID^E:0^RecName: Full=Caffeic acid 3-O-methyltransferase;^Eukaryota; Viridiplantae; Streptophyta; Embryophyta; Tracheophyta; Spermatophyta; Magnoliopsida; eudicotyledons; Gunneridae; Pentapetalae; asterids; lamiids; Solanales; Solanaceae; Solanoideae; Capsiceae; Capsicum	0.535325	0.584083	-0.756171	0.636698	1.07018	1.56251	-7.9704	-9.7444	-8.62007	3.0037	2.84405	2.72893	3.37506	3.05637	2.69817	2.55702	2.43894
1	Ntome_NODE_10060_length_2191_cov_273	BSDC1_DANRE^BSDC1_DANRE^Q:1811-1251,H:17-210^28.351%ID^E:5.29e-17^RecName: Full=BSD domain-containing protein 1;^Eukaryota; Metazoa; Chordata; Craniata; Vertebrata; Euteleostomi; Actinopterygii; Neopterygii; Teleostei; Ostariophysi; Cypriniformes; Cyprinidae; Danio	1.2792	1.6088	0.807963	0.783548	0.431536	0.466929	-5.46353	-3.0731	-4.77392	0.40815	0.33646	-0.104619	1.02897	0.762643	0.904816	2.12845	2.46769
1	Ntome_NODE_10062_length_2191_cov_229	ZFP1_ORYSJ^ZFP1_ORYSJ^Q:308-1894,H:4-518^28.108%ID^E:9.31e-40^RecName: Full=Probable E3 ubiquitin-protein ligase ZFP1 {ECO:0000305};^Eukaryota; Viridiplantae; Streptophyta; Embryophyta; Tracheophyta; Spermatophyta; Magnoliopsida; Liliopsida; Poales; Poaceae; BOP clade; Oryzoideae; Oryzeae; Oryzinae; Oryza; Oryza sativa	2.75089	2.67969	0.95043	0.411404	0.886174	0.917956	-5.02456	-5.02456	-5.02456	0.301332	0.128031	0.595442	-0.0119896	0.349438	0.350134	2.12681	2.63793
1	Ntome_NODE_10063_length_2191_cov_226	EFM_ARATH^EFM_ARATH^Q:2015-1071,H:6-298^42.105%ID^E:2.31e-49^RecName: Full=Myb family transcription factor EFM {ECO:0000303|PubMed:25132385};^Eukaryota; Viridiplantae; Streptophyta; Embryophyta; Tracheophyta; Spermatophyta; Magnoliopsida; eudicotyledons; Gunneridae; Pentapetalae; rosids; malvids; Brassicales; Brassicaceae; Camelineae; Arabidopsis	1.67214	1.50087	1.54296	0.128309	0.111507	0.899546	-6.48035	-5.38274	-6.48035	1.29536	1.4141	1.54556	1.22742	1.61547	-0.0493979	1.75327	3.68634
1	Ntome_NODE_10064_length_2191_cov_139	TBC17_MOUSE^TBC17_MOUSE^Q:487-1410,H:272-528^29.582%ID^E:3.11e-29^RecName: Full=TBC1 domain family member 17;^Eukaryota; Metazoa; Chordata; Craniata; Vertebrata; Euteleostomi; Mammalia; Eutheria; Euarchontoglires; Glires; Rodentia; Myomorpha; Muroidea; Muridae; Murinae; Mus; Mus	0.782014	-0.0796529	0.742202	-0.0114685	-0.156355	0.0690575	-2.88589	-1.0844	-1.89617	0.429587	0.266597	-0.0968973	1.07414	0.0743278	0.0133084	1.76496	0.994633
1	Ntome_NODE_10065_length_2191_cov_113	.	0.194198	0.194533	0.378179	-0.10312	0.0522596	1.53578	-1.23511	-0.474846	-1.38441	0.293979	-0.645038	0.57521	1.77882	0.0396206	-0.392947	0.670395	-1.47752
1	Ntome_NODE_10066_length_2191_cov_108	EXGA_ASPFC^EXGA_ASPFC^Q:931-1812,H:72-394^32.544%ID^E:9.95e-37^RecName: Full=Probable glucan 1,3-beta-glucosidase A;^Eukaryota; Fungi; Dikarya; Ascomycota; Pezizomycotina; Eurotiomycetes; Eurotiomycetidae; Eurotiales; Aspergillaceae; Aspergillus	1.49706	1.30463	0.741473	0.733865	-0.547365	0.329779	-5.27311	-4.21652	-5.27311	1.06817	0.909984	0.601691	1.19189	1.11904	0.571129	2.37061	2.87079
1	Ntome_NODE_10067_length_2191_cov_103	.	1.3466	1.21208	0.007954	0.0133879	-0.0275641	0.513121	-4.56796	-1.91032	-4.56796	0.719657	1.04203	0.279533	1.13164	0.504142	0.198102	1.34037	2.76519
1	Ntome_NODE_10069_length_2188_cov_68	.	1.17625	0.880932	0.223536	-0.860268	0.159808	0.805238	-4.73113	-3.67454	-2.77879	0.445197	1.04182	0.554277	1.71066	0.920787	-0.338121	2.35049	2.11386
1	Ntome_NODE_1007_length_5079_cov_218	ATX2_ARATH^ATX2_ARATH^Q:1039-3912,H:144-1080^62.023%ID^E:0^RecName: Full=Histone-lysine N-methyltransferase ATX2;^Eukaryota; Viridiplantae; Streptophyta; Embryophyta; Tracheophyta; Spermatophyta; Magnoliopsida; eudicotyledons; Gunneridae; Pentapetalae; rosids; malvids; Brassicales; Brassicaceae; Camelineae; Arabidopsis	0.743501	0.662755	0.439475	-0.406275	-0.304233	0.00858397	-3.00252	-2.21171	-2.85438	0.363219	0.555864	0.250792	1.39599	0.756476	0.384712	1.65681	1.56094
1	Ntome_NODE_10071_length_2190_cov_302	UPL3_ARATH^UPL3_ARATH^Q:2190-490,H:1320-1888^77.193%ID^E:0^RecName: Full=E3 ubiquitin-protein ligase UPL3;^Eukaryota; Viridiplantae; Streptophyta; Embryophyta; Tracheophyta; Spermatophyta; Magnoliopsida; eudicotyledons; Gunneridae; Pentapetalae; rosids; malvids; Brassicales; Brassicaceae; Camelineae; Arabidopsis	1.65826	1.69288	-0.141779	0.769871	0.384544	0.419147	-4.96368	-4.74617	-7.80967	1.45637	1.06263	1.20158	1.73471	1.40644	1.33264	1.88777	2.65445
1	Ntome_NODE_10072_length_2190_cov_238	PLPD2_ARATH^PLPD2_ARATH^Q:2027-390,H:19-557^83.696%ID^E:0^RecName: Full=Dihydrolipoyl dehydrogenase 2, chloroplastic;^Eukaryota; Viridiplantae; Streptophyta; Embryophyta; Tracheophyta; Spermatophyta; Magnoliopsida; eudicotyledons; Gunneridae; Pentapetalae; rosids; malvids; Brassicales; Brassicaceae; Camelineae; Arabidopsis	1.81816	1.24656	-0.203171	1.0659	0.0389288	0.784822	-6.98177	-5.68312	-5.60882	1.23366	0.662227	0.864093	2.03286	1.31363	1.24141	2.63281	3.54183
1	Ntome_NODE_10073_length_2190_cov_138	SKI24_ARATH^SKI24_ARATH^Q:159-878,H:1-239^53.112%ID^E:2.16e-63^RecName: Full=F-box protein SKIP24;^Eukaryota; Viridiplantae; Streptophyta; Embryophyta; Tracheophyta; Spermatophyta; Magnoliopsida; eudicotyledons; Gunneridae; Pentapetalae; rosids; malvids; Brassicales; Brassicaceae; Camelineae; Arabidopsis	0.704556	0.886613	0.256795	-0.481149	-0.231617	-0.0977769	-3.04294	-2.33951	-3.15869	0.647455	0.711166	0.357671	1.25448	0.723724	0.579898	1.91409	1.31524
1	Ntome_NODE_10074_length_2190_cov_117	TBL33_ARATH^TBL33_ARATH^Q:778-569,H:65-135^64.789%ID^E:3.41e-21^RecName: Full=Protein trichome birefringence-like 33;^Eukaryota; Viridiplantae; Streptophyta; Embryophyta; Tracheophyta; Spermatophyta; Magnoliopsida; eudicotyledons; Gunneridae; Pentapetalae; rosids; malvids; Brassicales; Brassicaceae; Camelineae; Arabidopsis	1.7798	1.14141	1.01593	-0.0482008	-1.33771	-0.185704	-2.92267	-4.50763	-2.95673	0.662293	0.466438	0.299723	2.03044	0.582798	0.794687	0.986783	2.19835
1	Ntome_NODE_10076_length_2190_cov_77	.	0.924749	1.05307	-0.501516	0.530144	-0.253588	-0.594625	-4.50152	-4.50152	-4.50152	1.62777	2.12784	1.35671	1.17091	0.777956	1.10374	2.23995	1.94143
1	Ntome_NODE_10077_length_2190_cov_69	EME1B_ARATH^EME1B_ARATH^Q:1067-180,H:250-541^66.554%ID^E:1.8e-138^RecName: Full=Crossover junction endonuclease EME1B;^Eukaryota; Viridiplantae; Streptophyta; Embryophyta; Tracheophyta; Spermatophyta; Magnoliopsida; eudicotyledons; Gunneridae; Pentapetalae; rosids; malvids; Brassicales; Brassicaceae; Camelineae; Arabidopsis	0.805317	0.925805	0.0402134	-0.526081	-0.848687	0.499478	-1.78884	-2.95065	-2.81182	1.23898	0.0906498	-0.0941771	1.37927	0.620892	-0.407579	1.64881	2.17843
1	Ntome_NODE_10079_length_2189_cov_270	SCL15_ARATH^SCL15_ARATH^Q:486-1880,H:26-485^50.939%ID^E:1.1e-144^RecName: Full=Scarecrow-like protein 15;^Eukaryota; Viridiplantae; Streptophyta; Embryophyta; Tracheophyta; Spermatophyta; Magnoliopsida; eudicotyledons; Gunneridae; Pentapetalae; rosids; malvids; Brassicales; Brassicaceae; Camelineae; Arabidopsis	2.2238	2.03897	0.411895	1.22679	1.05224	0.502527	-4.49408	-6.37229	-7.42357	0.950579	1.28147	0.623622	1.24629	0.833038	0.542248	2.99611	2.36037
1	Ntome_NODE_1008_length_5077_cov_245	ALDO3_ARATH^ALDO3_ARATH^Q:644-4675,H:3-1326^60.295%ID^E:0^RecName: Full=Abscisic-aldehyde oxidase;^Eukaryota; Viridiplantae; Streptophyta; Embryophyta; Tracheophyta; Spermatophyta; Magnoliopsida; eudicotyledons; Gunneridae; Pentapetalae; rosids; malvids; Brassicales; Brassicaceae; Camelineae; Arabidopsis	2.47908	2.31472	1.01459	0.271467	0.0700328	0.358064	-4.43585	-4.90716	-4.8588	0.682519	0.466562	0.476217	1.03704	0.62729	0.851214	1.75316	1.79986
1	Ntome_NODE_10080_length_2189_cov_221	PUS3_ARATH^PUS3_ARATH^Q:1583-180,H:13-478^69.767%ID^E:0^RecName: Full=RNA pseudouridine synthase 3, mitochondrial;^Eukaryota; Viridiplantae; Streptophyta; Embryophyta; Tracheophyta; Spermatophyta; Magnoliopsida; eudicotyledons; Gunneridae; Pentapetalae; rosids; malvids; Brassicales; Brassicaceae; Camelineae; Arabidopsis	2.20459	2.15133	1.35862	0.256176	0.248181	0.459742	-4.84732	-4.84732	-4.84732	0.387639	0.740943	-0.518198	1.21963	1.09918	0.554582	1.91782	2.46175
1	Ntome_NODE_10081_length_2189_cov_197	.	1.38038	1.87904	1.05308	0.362528	0.157242	0.93536	-6.16667	-3.70986	-6.16667	1.19027	0.628007	0.707637	1.35446	1.09204	0.553199	1.84316	2.9068
1	Ntome_NODE_10082_length_2189_cov_117	CPSF1_ARATH^CPSF1_ARATH^Q:244-1275,H:1-354^65.254%ID^E:2.15e-145^RecName: Full=Cleavage and polyadenylation specificity factor subunit 1;^Eukaryota; Viridiplantae; Streptophyta; Embryophyta; Tracheophyta; Spermatophyta; Magnoliopsida; eudicotyledons; Gunneridae; Pentapetalae; rosids; malvids; Brassicales; Brassicaceae; Camelineae; Arabidopsis	1.1734	0.740635	0.0254898	-0.47376	0.330006	-0.228079	-4.99732	-4.99732	-4.99732	1.42525	1.15952	1.40595	1.90028	1.53062	1.36515	2.6014	2.0361
1	Ntome_NODE_10083_length_2188_cov_95	.	1.55551	1.29535	1.65005	0.768488	0.0619263	0.29841	-6.06756	-5.03899	-4.02492	0.60557	1.23813	0.609241	1.44261	0.540359	0.112545	2.23622	2.71707
1	Ntome_NODE_10084_length_2188_cov_300	AB7G_ARATH^AB7G_ARATH^Q:2015-102,H:35-666^78.594%ID^E:0^RecName: Full=ABC transporter G family member 7;^Eukaryota; Viridiplantae; Streptophyta; Embryophyta; Tracheophyta; Spermatophyta; Magnoliopsida; eudicotyledons; Gunneridae; Pentapetalae; rosids; malvids; Brassicales; Brassicaceae; Camelineae; Arabidopsis	1.90204	1.89069	0.369119	0.39042	-0.151485	-0.204634	-4.77873	-3.80684	-6.41565	0.769229	1.58829	0.922956	1.42236	0.876583	0.597928	2.1105	2.51722
1	Ntome_NODE_10085_length_2188_cov_287	RPT2_ARATH^RPT2_ARATH^Q:2006-291,H:8-593^71.429%ID^E:0^RecName: Full=Root phototropism protein 2;^Eukaryota; Viridiplantae; Streptophyta; Embryophyta; Tracheophyta; Spermatophyta; Magnoliopsida; eudicotyledons; Gunneridae; Pentapetalae; rosids; malvids; Brassicales; Brassicaceae; Camelineae; Arabidopsis	1.26967	0.61251	-0.196953	0.0511712	-0.360405	0.247816	-3.00648	-3.0022	-2.03556	0.551559	0.480161	0.425866	0.802128	0.139521	0.344488	1.70104	1.97566
1	Ntome_NODE_10086_length_2188_cov_261	IST1_PONAB^IST1_PONAB^Q:1723-1349,H:2-128^29.134%ID^E:2.91e-06^RecName: Full=IST1 homolog;^Eukaryota; Metazoa; Chordata; Craniata; Vertebrata; Euteleostomi; Mammalia; Eutheria; Euarchontoglires; Primates; Haplorrhini; Catarrhini; Hominidae; Pongo	0.182682	0.0508207	0.227937	1.16585	-0.0380998	1.45463	-5.85119	-4.33954	-3.57683	1.35721	0.495027	0.345564	1.80712	0.550038	-0.534631	2.72154	3.98187
1	Ntome_NODE_10087_length_2188_cov_245	IPO5_HUMAN^IPO5_HUMAN^Q:68-2182,H:212-889^26.997%ID^E:2.06e-70^RecName: Full=Importin-5;^Eukaryota; Metazoa; Chordata; Craniata; Vertebrata; Euteleostomi; Mammalia; Eutheria; Euarchontoglires; Primates; Haplorrhini; Catarrhini; Hominidae; Homo	1.12	1.22466	0.324579	0.0547398	0.485044	0.948887	-4.76288	-3.7414	-3.17792	0.858875	-1.58656	-0.273597	1.46363	0.715765	-0.0769433	2.79086	3.63227
1	Ntome_NODE_10088_length_2188_cov_171	PQBP1_BOVIN^PQBP1_BOVIN^Q:1408-2025,H:48-261^36.564%ID^E:2.48e-24^RecName: Full=Polyglutamine-binding protein 1;^Eukaryota; Metazoa; Chordata; Craniata; Vertebrata; Euteleostomi; Mammalia; Eutheria; Laurasiatheria; Cetartiodactyla; Ruminantia; Pecora; Bovidae; Bovinae; Bos	1.56147	1.59822	0.518702	0.0702077	0.414005	-0.314188	-4.54019	-5.31419	-4.29983	1.15407	1.17734	0.70818	1.40869	1.47541	0.790778	1.41373	2.17759
1	Ntome_NODE_10089_length_2188_cov_45	RNHX1_ARATH^RNHX1_ARATH^Q:2004-1423,H:1-196^31.122%ID^E:5.11e-24^RecName: Full=Putative ribonuclease H protein At1g65750;^Eukaryota; Viridiplantae; Streptophyta; Embryophyta; Tracheophyta; Spermatophyta; Magnoliopsida; eudicotyledons; Gunneridae; Pentapetalae; rosids; malvids; Brassicales; Brassicaceae; Camelineae; Arabidopsis`RNHX1_ARATH^RNHX1_ARATH^Q:1276-950,H:240-353^27.586%ID^E:5.87e-06^RecN…	0.769312	0.943201	-0.160953	-1.62301	-1.30108	-0.0356403	-1.30397	-0.135004	-1.32728	0.376995	0.464458	0.464458	0.969153	1.33166	0.836426	-0.81565	0.54692
1	Ntome_NODE_1009_length_5075_cov_210	.	0.700252	0.604944	-0.0684905	-0.23355	0.324347	0.165	-5.27794	-5.27794	-4.69298	1.5571	1.26028	0.889675	1.99706	1.71641	1.65869	1.91927	2.75787
1	Ntome_NODE_10091_length_2188_cov_27	PP277_ARATH^PP277_ARATH^Q:67-2010,H:89-781^46.176%ID^E:0^RecName: Full=Pentatricopeptide repeat-containing protein At3g50420;^Eukaryota; Viridiplantae; Streptophyta; Embryophyta; Tracheophyta; Spermatophyta; Magnoliopsida; eudicotyledons; Gunneridae; Pentapetalae; rosids; malvids; Brassicales; Brassicaceae; Camelineae; Arabidopsis`PP277_ARATH^PP277_ARATH^Q:133-1770,H:2-596^23.244%ID^E:7.72e-44^Re…	1.09096	1.22174	0.777611	-0.0449638	-0.00152449	-0.569018	-3.24031	-3.24031	-3.24031	-0.260286	0.579357	0.895552	0.785603	1.79619	-0.0544448	1.40354	2.10061
1	Ntome_NODE_10092_length_2187_cov_266	FTZ22_ARATH^FTZ22_ARATH^Q:1860-460,H:1-472^75.104%ID^E:0^RecName: Full=Cell division protein FtsZ homolog 2-2, chloroplastic;^Eukaryota; Viridiplantae; Streptophyta; Embryophyta; Tracheophyta; Spermatophyta; Magnoliopsida; eudicotyledons; Gunneridae; Pentapetalae; rosids; malvids; Brassicales; Brassicaceae; Camelineae; Arabidopsis	2.19992	2.114	0.89255	0.764679	0.594901	0.85462	-6.75692	-6.75692	-6.75692	1.2402	1.06727	0.932168	2.23559	1.30836	0.597724	2.549	2.91978
1	Ntome_NODE_10094_length_2187_cov_217	GDL61_ARATH^GDL61_ARATH^Q:1125-238,H:82-380^63.88%ID^E:1.49e-130^RecName: Full=GDSL esterase/lipase At4g01130;^Eukaryota; Viridiplantae; Streptophyta; Embryophyta; Tracheophyta; Spermatophyta; Magnoliopsida; eudicotyledons; Gunneridae; Pentapetalae; rosids; malvids; Brassicales; Brassicaceae; Camelineae; Arabidopsis`GDL61_ARATH^GDL61_ARATH^Q:2109-1948,H:30-83^77.778%ID^E:6.12e-21^RecName: Full=GD…	0.0762225	-0.259786	-1.27592	-0.147597	-0.532199	0.321129	-1.9894	-0.615748	-1.76393	0.0759723	0.0483828	-0.336182	1.63552	1.18187	0.766317	1.11415	1.70119
1	Ntome_NODE_10095_length_2187_cov_173	RF2B_ORYSJ^RF2B_ORYSJ^Q:845-429,H:115-253^62.59%ID^E:9.59e-44^RecName: Full=Transcription factor RF2b;^Eukaryota; Viridiplantae; Streptophyta; Embryophyta; Tracheophyta; Spermatophyta; Magnoliopsida; Liliopsida; Poales; Poaceae; BOP clade; Oryzoideae; Oryzeae; Oryzinae; Oryza; Oryza sativa	1.84243	1.73317	0.671655	0.530131	0.585914	0.631994	-6.14187	-6.14187	-6.14187	1.61961	1.09634	1.12567	1.71686	1.37682	1.35566	2.1013	2.03804
1	Ntome_NODE_10096_length_2187_cov_166	BGL42_ARATH^BGL42_ARATH^Q:1489-161,H:47-490^64.64%ID^E:0^RecName: Full=Beta-glucosidase 42 {ECO:0000303|PubMed:15604686};^Eukaryota; Viridiplantae; Streptophyta; Embryophyta; Tracheophyta; Spermatophyta; Magnoliopsida; eudicotyledons; Gunneridae; Pentapetalae; rosids; malvids; Brassicales; Brassicaceae; Camelineae; Arabidopsis	2.83807	2.37042	0.979489	1.57827	1.42385	0.537512	-5.36655	-6.39512	-6.39512	0.44434	0.837641	0.247008	0.915497	0.587763	0.318167	2.44387	2.63489
1	Ntome_NODE_10097_length_2187_cov_73	SYCM_ARATH^SYCM_ARATH^Q:1958-432,H:64-551^59.921%ID^E:0^RecName: Full=Cysteine--tRNA ligase, chloroplastic/mitochondrial {ECO:0000305};^Eukaryota; Viridiplantae; Streptophyta; Embryophyta; Tracheophyta; Spermatophyta; Magnoliopsida; eudicotyledons; Gunneridae; Pentapetalae; rosids; malvids; Brassicales; Brassicaceae; Camelineae; Arabidopsis	1.80079	1.7159	-0.00656492	-0.743531	0.671507	0.371947	-3.32849	-1.6325	-2.2108	-0.743531	0.301446	-2.32849	-0.153767	2.21005	2.00171	0.75897	1.31536
1	Ntome_NODE_10098_length_2187_cov_52	RAP27_ARATH^RAP27_ARATH^Q:1938-568,H:1-445^47.479%ID^E:5.68e-97^RecName: Full=Ethylene-responsive transcription factor RAP2-7;^Eukaryota; Viridiplantae; Streptophyta; Embryophyta; Tracheophyta; Spermatophyta; Magnoliopsida; eudicotyledons; Gunneridae; Pentapetalae; rosids; malvids; Brassicales; Brassicaceae; Camelineae; Arabidopsis	1.69531	1.52427	0.587229	0.252926	-0.476853	0.37214	-4.16391	-2.23412	-2.91295	0.815655	0.866423	1.11109	0.658817	-1.18938	-0.733628	2.74298	1.08401
1	Ntome_NODE_101_length_8492_cov_178	NU133_ARATH^NU133_ARATH^Q:4414-458,H:1-1285^54.899%ID^E:0^RecName: Full=Nuclear pore complex protein NUP133 {ECO:0000303|PubMed:21189294};^Eukaryota; Viridiplantae; Streptophyta; Embryophyta; Tracheophyta; Spermatophyta; Magnoliopsida; eudicotyledons; Gunneridae; Pentapetalae; rosids; malvids; Brassicales; Brassicaceae; Camelineae; Arabidopsis	2.15084	1.87292	0.644821	0.159465	0.148624	0.423923	-5.62089	-6.68439	-6.68439	1.30099	1.21139	1.26567	2.08108	1.21073	1.04326	2.22927	3.2467
1	Ntome_NODE_1010_length_5075_cov_187	UBP14_ARATH^UBP14_ARATH^Q:231-1316,H:1-361^80.663%ID^E:0^RecName: Full=Ubiquitin carboxyl-terminal hydrolase 14;^Eukaryota; Viridiplantae; Streptophyta; Embryophyta; Tracheophyta; Spermatophyta; Magnoliopsida; eudicotyledons; Gunneridae; Pentapetalae; rosids; malvids; Brassicales; Brassicaceae; Camelineae; Arabidopsis`UBP14_ARATH^UBP14_ARATH^Q:2881-4113,H:387-797^66.586%ID^E:4.92e-180^RecName: Fu…	1.74094	1.63108	0.0126445	0.31814	0.134071	0.130717	-4.44511	-5.80922	-4.99283	1.19998	0.917731	0.792248	1.56959	1.34619	0.862159	1.93721	2.65446
1	Ntome_NODE_10100_length_2186_cov_263	BGL46_ARATH^BGL46_ARATH^Q:529-1920,H:37-504^57.051%ID^E:0^RecName: Full=Beta-glucosidase 46;^Eukaryota; Viridiplantae; Streptophyta; Embryophyta; Tracheophyta; Spermatophyta; Magnoliopsida; eudicotyledons; Gunneridae; Pentapetalae; rosids; malvids; Brassicales; Brassicaceae; Camelineae; Arabidopsis	1.98543	1.38268	0.318502	1.2506	0.786371	1.46843	-5.84036	-5.84036	-4.80474	0.804506	0.287067	0.461411	2.09085	0.527011	1.05361	1.97956	2.08943
1	Ntome_NODE_10101_length_2186_cov_159	P2C27_ARATH^P2C27_ARATH^Q:1026-1775,H:126-376^84.861%ID^E:3.25e-143^RecName: Full=Probable protein phosphatase 2C 27 {ECO:0000303|PubMed:19021904};^Eukaryota; Viridiplantae; Streptophyta; Embryophyta; Tracheophyta; Spermatophyta; Magnoliopsida; eudicotyledons; Gunneridae; Pentapetalae; rosids; malvids; Brassicales; Brassicaceae; Camelineae; Arabidopsis	2.0527	2.18997	0.768924	0.303816	-0.0318167	0.396829	-6.38072	-4.69815	-6.38072	1.39808	1.30192	0.736142	1.61697	1.44455	1.40731	1.5141	2.3601
1	Ntome_NODE_10102_length_2186_cov_152	ELP5_ARATH^ELP5_ARATH^Q:1053-529,H:177-355^54.749%ID^E:1.41e-51^RecName: Full=Elongator complex protein 5;^Eukaryota; Viridiplantae; Streptophyta; Embryophyta; Tracheophyta; Spermatophyta; Magnoliopsida; eudicotyledons; Gunneridae; Pentapetalae; rosids; malvids; Brassicales; Brassicaceae; Camelineae; Arabidopsis	1.34656	1.34128	-0.0910358	0.483265	0.0943711	0.585458	-4.29387	-5.53265	-3.79713	0.65143	0.980681	0.718688	1.66053	1.30857	0.573571	1.50462	2.46566
1	Ntome_NODE_10103_length_2185_cov_284	Y2626_ARATH^Y2626_ARATH^Q:111-1781,H:6-556^71.809%ID^E:0^RecName: Full=BTB/POZ domain-containing protein At2g46260;^Eukaryota; Viridiplantae; Streptophyta; Embryophyta; Tracheophyta; Spermatophyta; Magnoliopsida; eudicotyledons; Gunneridae; Pentapetalae; rosids; malvids; Brassicales; Brassicaceae; Camelineae; Arabidopsis	1.98052	1.78799	0.119123	0.47325	0.0146571	0.824157	-5.7596	-5.7596	-5.7596	1.17739	0.991807	0.99902	1.49287	1.30907	1.22738	2.13157	2.75001
1	Ntome_NODE_10104_length_2185_cov_256	SUV3M_ORYSJ^SUV3M_ORYSJ^Q:378-1877,H:57-556^74.4%ID^E:0^RecName: Full=ATP-dependent RNA helicase SUV3, mitochondrial {ECO:0000303|PubMed:23808500};^Eukaryota; Viridiplantae; Streptophyta; Embryophyta; Tracheophyta; Spermatophyta; Magnoliopsida; Liliopsida; Poales; Poaceae; BOP clade; Oryzoideae; Oryzeae; Oryzinae; Oryza; Oryza sativa	0.775346	1.08215	-1.28016	-0.45655	-0.598669	-1.02018	-3.16258	-2.40979	-5.64101	1.30802	1.20389	1.18858	2.04512	1.23218	1.27125	2.00251	2.4599
1	Ntome_NODE_10105_length_2185_cov_85	.	0.474218	1.03659	-0.234483	-0.0856341	-0.610725	-0.0159687	-2.95856	-2.53387	-3.13334	0.953805	0.613025	0.292928	1.38761	0.273481	0.552315	1.90175	2.08686
1	Ntome_NODE_10106_length_2185_cov_35	COL9_ARATH^COL9_ARATH^Q:1825-605,H:1-372^49.652%ID^E:4.21e-108^RecName: Full=Zinc finger protein CONSTANS-LIKE 9;^Eukaryota; Viridiplantae; Streptophyta; Embryophyta; Tracheophyta; Spermatophyta; Magnoliopsida; eudicotyledons; Gunneridae; Pentapetalae; rosids; malvids; Brassicales; Brassicaceae; Camelineae; Arabidopsis	1.11299	1.79575	-0.889908	-0.425744	-0.919173	-1.20605	-1.25745	-0.0345267	-3.20605	1.31374	1.39861	-0.392529	0.878861	1.04111	0.88056	0.115874	-0.206054
1	Ntome_NODE_10108_length_2186_cov_29	.	1.64531	1.63807	-0.261584	0.197847	-0.0916593	0.0603438	-3.26158	-3.26158	-3.26158	0.545771	0.54783	-0.939656	0.0603438	-0.0243265	1.32338	3.21415	1.86893
1	Ntome_NODE_10109_length_2184_cov_220	WRKY4_ARATH^WRKY4_ARATH^Q:270-1610,H:16-468^45.72%ID^E:1.84e-109^RecName: Full=Probable WRKY transcription factor 4;^Eukaryota; Viridiplantae; Streptophyta; Embryophyta; Tracheophyta; Spermatophyta; Magnoliopsida; eudicotyledons; Gunneridae; Pentapetalae; rosids; malvids; Brassicales; Brassicaceae; Camelineae; Arabidopsis`WRKY4_ARATH^WRKY4_ARATH^Q:1431-1634,H:229-295^55.882%ID^E:7.4e-16^RecName: …	1.42884	0.978979	0.0739126	-0.434554	-0.758113	-0.0954593	-2.86466	-1.26124	-2.09014	-0.364443	-0.41801	-0.826836	1.58443	1.00644	0.783286	1.79786	1.45969
1	Ntome_NODE_10110_length_2184_cov_132	RL10_SOLME^RL10_SOLME^Q:1477-953,H:4-184^93.923%ID^E:4.49e-115^RecName: Full=60S ribosomal protein L10;^Eukaryota; Viridiplantae; Streptophyta; Embryophyta; Tracheophyta; Spermatophyta; Magnoliopsida; eudicotyledons; Gunneridae; Pentapetalae; asterids; lamiids; Solanales; Solanaceae; Solanoideae; Solaneae; Solanum`RL10_SOLME^RL10_SOLME^Q:435-295,H:172-218^91.489%ID^E:7.79e-19^RecName: Full=60S ri…	1.441	1.22109	-0.7379	0.453182	-0.0578164	-0.241059	-2.39231	-1.99716	-3.19171	0.240352	0.428933	0.260819	0.795222	0.116219	0.00557986	1.83447	1.82109
1	Ntome_NODE_10111_length_2184_cov_122	.	1.18167	1.15229	0.190109	1.09898	0.555198	1.31135	-5.69595	-4.76238	-5.69595	1.40639	0.310569	0.989006	1.71827	0.532865	0.448705	2.0065	3.25238
1	Ntome_NODE_10112_length_2184_cov_102	AHL1_ARATH^AHL1_ARATH^Q:851-1777,H:21-355^59.357%ID^E:4.55e-99^RecName: Full=AT-hook motif nuclear-localized protein 1 {ECO:0000303|PubMed:15604740};^Eukaryota; Viridiplantae; Streptophyta; Embryophyta; Tracheophyta; Spermatophyta; Magnoliopsida; eudicotyledons; Gunneridae; Pentapetalae; rosids; malvids; Brassicales; Brassicaceae; Camelineae; Arabidopsis	2.34608	2.04594	1.63612	1.23882	0.377799	1.09537	-3.30686	-4.91093	-2.92179	0.0562402	0.0782106	0.133903	0.123375	0.0539323	1.06199	0.673433	0.218355
1	Ntome_NODE_10114_length_2183_cov_251	NOB1_BOVIN^NOB1_BOVIN^Q:1443-1859,H:233-368^46.479%ID^E:4.87e-32^RecName: Full=RNA-binding protein NOB1;^Eukaryota; Metazoa; Chordata; Craniata; Vertebrata; Euteleostomi; Mammalia; Eutheria; Laurasiatheria; Cetartiodactyla; Ruminantia; Pecora; Bovidae; Bovinae; Bos`NOB1_BOVIN^NOB1_BOVIN^Q:312-650,H:29-143^33.913%ID^E:3.44e-12^RecName: Full=RNA-binding protein NOB1;^Eukaryota; Metazoa; Chordata; C…	2.3045	1.67213	0.53594	1.23747	0.0179716	0.867234	-4.4242	-5.29279	-6.29998	0.749865	0.810108	0.395732	1.03692	1.11187	0.172829	1.86407	3.24034
1	Ntome_NODE_10115_length_2183_cov_234	DES6_BOROF^DES6_BOROF^Q:1751-408,H:1-448^73.214%ID^E:0^RecName: Full=Acyl-lipid (9-3)-desaturase {ECO:0000303|PubMed:9108131};^Eukaryota; Viridiplantae; Streptophyta; Embryophyta; Tracheophyta; Spermatophyta; Magnoliopsida; eudicotyledons; Gunneridae; Pentapetalae; asterids; lamiids; Boraginales; Boraginaceae; Boraginoideae; Boragineae; Boragininae; Borago	2.78444	2.55817	1.38632	0.98877	0.464919	0.968419	-5.96199	-5.52918	-7.82196	1.38674	1.45092	0.596101	1.3434	1.23118	0.241595	1.13514	2.77702
1	Ntome_NODE_10118_length_2183_cov_123	MGAT2_ARATH^MGAT2_ARATH^Q:584-1873,H:6-428^66.125%ID^E:0^RecName: Full=Alpha-1,6-mannosyl-glycoprotein 2-beta-N-acetylglucosaminyltransferase {ECO:0000305};^Eukaryota; Viridiplantae; Streptophyta; Embryophyta; Tracheophyta; Spermatophyta; Magnoliopsida; eudicotyledons; Gunneridae; Pentapetalae; rosids; malvids; Brassicales; Brassicaceae; Camelineae; Arabidopsis	1.43206	1.26645	-0.0288996	0.379763	0.826075	0.944628	-5.81026	-5.81026	-5.81026	1.62237	1.27848	1.34142	1.66418	1.57258	1.03159	1.85508	2.24502
1	Ntome_NODE_10119_length_2183_cov_82	THOC2_ARATH^THOC2_ARATH^Q:1672-2181,H:669-838^84.118%ID^E:6.44e-80^RecName: Full=THO complex subunit 2;^Eukaryota; Viridiplantae; Streptophyta; Embryophyta; Tracheophyta; Spermatophyta; Magnoliopsida; eudicotyledons; Gunneridae; Pentapetalae; rosids; malvids; Brassicales; Brassicaceae; Camelineae; Arabidopsis	1.62404	1.63059	0.830779	-1.03529	-0.324365	-0.969219	-4.26641	-4.26641	-4.26641	0.896283	0.721365	1.39978	1.67751	1.30132	0.922228	2.11729	2.00692
1	Ntome_NODE_1012_length_5074_cov_142	IF2P_SCHPO^IF2P_SCHPO^Q:2222-417,H:473-1078^57.655%ID^E:0^RecName: Full=Eukaryotic translation initiation factor 5B;^Eukaryota; Fungi; Dikarya; Ascomycota; Taphrinomycotina; Schizosaccharomycetes; Schizosaccharomycetales; Schizosaccharomycetaceae; Schizosaccharomyces	1.9379	1.59397	1.10921	-0.0719837	-1.49317	-0.19043	-4.12829	-4.00446	-5.21235	0.94206	0.792597	-0.217321	0.927403	1.27725	0.630625	2.92063	3.18635
1	Ntome_NODE_10120_length_2182_cov_74	.	1.13087	1.04994	0.654489	0.432096	-0.760549	0.204334	-4.15287	-4.15287	-3.5679	0.890435	1.11392	0.204686	1.33899	1.18698	1.38629	1.06824	1.97291
1	Ntome_NODE_10121_length_2183_cov_45	GENL1_ARATH^GENL1_ARATH^Q:109-1911,H:1-599^54.708%ID^E:0^RecName: Full=Flap endonuclease GEN-like 1;^Eukaryota; Viridiplantae; Streptophyta; Embryophyta; Tracheophyta; Spermatophyta; Magnoliopsida; eudicotyledons; Gunneridae; Pentapetalae; rosids; malvids; Brassicales; Brassicaceae; Camelineae; Arabidopsis	1.01495	0.282223	-0.303221	0.219273	-0.0888971	0.264794	-3.62371	-3.62371	-3.62371	0.874545	0.624222	0.463757	1.89199	0.49731	0.588864	2.30703	2.23428
1	Ntome_NODE_10123_length_2182_cov_262	.	0.708689	1.09485	-0.113716	-0.0582015	-0.434343	0.260917	-2.66573	-3.14141	-3.92003	0.8608	0.513784	0.172852	1.182	0.915414	0.49193	1.7643	2.36789
1	Ntome_NODE_10124_length_2182_cov_186	HSDD2_ARATH^HSDD2_ARATH^Q:48-1175,H:1-376^76.33%ID^E:0^RecName: Full=3beta-hydroxysteroid-dehydrogenase/decarboxylase isoform 2;^Eukaryota; Viridiplantae; Streptophyta; Embryophyta; Tracheophyta; Spermatophyta; Magnoliopsida; eudicotyledons; Gunneridae; Pentapetalae; rosids; malvids; Brassicales; Brassicaceae; Camelineae; Arabidopsis`HSDD2_ARATH^HSDD2_ARATH^Q:1185-1403,H:489-564^40.789%ID^E:9.8e-…	2.45295	2.06879	-0.170925	0.754085	0.3234	0.512344	-6.4615	-6.4615	-6.4615	1.41643	1.4588	1.2826	1.69585	1.3232	0.91363	2.46936	2.88398
1	Ntome_NODE_10125_length_2182_cov_56	SUVH4_ARATH^SUVH4_ARATH^Q:1804-134,H:81-608^60.465%ID^E:0^RecName: Full=Histone-lysine N-methyltransferase, H3 lysine-9 specific SUVH4;^Eukaryota; Viridiplantae; Streptophyta; Embryophyta; Tracheophyta; Spermatophyta; Magnoliopsida; eudicotyledons; Gunneridae; Pentapetalae; rosids; malvids; Brassicales; Brassicaceae; Camelineae; Arabidopsis	1.3599	1.69536	0.421165	-3.38103	-1.03053	0.566637	-1.64985	-3.38103	-3.38103	0.31719	1.0106	-0.29187	1.91616	0.735003	0.841621	2.03311	2.21859
1	Ntome_NODE_10127_length_2192_cov_21	ATPF_NICTO^ATPF_NICTO^Q:1184-1630,H:40-175^83.893%ID^E:2.49e-69^RecName: Full=ATP synthase subunit b, chloroplastic {ECO:0000255|HAMAP-Rule:MF_01398};^Eukaryota; Viridiplantae; Streptophyta; Embryophyta; Tracheophyta; Spermatophyta; Magnoliopsida; eudicotyledons; Gunneridae; Pentapetalae; asterids; lamiids; Solanales; Solanaceae; Nicotianoideae; Nicotianeae; Nicotiana`ATPF_NICTO^ATPF_NICTO^Q:414-…	-0.126966	-0.470232	-0.121017	-0.78798	-1.37412	-0.58135	-0.903205	-0.864002	-1.49036	0.0730848	0.260671	0.0914985	1.63463	0.660578	0.0542452	1.228	2.71652
1	Ntome_NODE_10128_length_2181_cov_301	EMB8_PICGL^EMB8_PICGL^Q:1-801,H:173-445^30.909%ID^E:1.55e-30^RecName: Full=Embryogenesis-associated protein EMB8;^Eukaryota; Viridiplantae; Streptophyta; Embryophyta; Tracheophyta; Spermatophyta; Pinidae; Pinales; Pinaceae; Picea	1.41414	1.2083	0.469067	0.0902911	-0.0251575	0.515597	-5.30203	-5.30203	-5.30203	1.60161	0.138594	1.26174	1.76396	1.56179	0.624922	2.32624	2.95498
1	Ntome_NODE_10129_length_2181_cov_283	RS52_ARATH^RS52_ARATH^Q:1311-1931,H:2-207^83.092%ID^E:4.92e-120^RecName: Full=40S ribosomal protein S5-2;^Eukaryota; Viridiplantae; Streptophyta; Embryophyta; Tracheophyta; Spermatophyta; Magnoliopsida; eudicotyledons; Gunneridae; Pentapetalae; rosids; malvids; Brassicales; Brassicaceae; Camelineae; Arabidopsis	2.03569	1.19942	0.360717	1.11291	0.950793	0.842976	-6.37424	-6.35877	-6.63961	1.35765	1.04516	1.05952	1.55601	1.68013	0.569473	2.08787	3.5143
1	Ntome_NODE_1013_length_5071_cov_278	PROF2_TOBAC^PROF2_TOBAC^Q:3908-3507,H:1-134^99.254%ID^E:1.12e-74^RecName: Full=Profilin-2;^Eukaryota; Viridiplantae; Streptophyta; Embryophyta; Tracheophyta; Spermatophyta; Magnoliopsida; eudicotyledons; Gunneridae; Pentapetalae; asterids; lamiids; Solanales; Solanaceae; Nicotianoideae; Nicotianeae; Nicotiana	1.69395	1.55263	0.0680498	0.521217	0.0732118	0.52271	-4.35757	-5.1565	-4.59031	0.894582	0.439366	0.472703	1.25584	0.908718	0.287457	2.37878	3.03517
1	Ntome_NODE_10130_length_2181_cov_268	EIF3L_NEMVE^EIF3L_NEMVE^Q:138-1664,H:13-522^44.742%ID^E:8.82e-157^RecName: Full=Eukaryotic translation initiation factor 3 subunit L {ECO:0000255|HAMAP-Rule:MF_03011};^Eukaryota; Metazoa; Cnidaria; Anthozoa; Hexacorallia; Actiniaria; Edwardsiidae; Nematostella	2.45808	2.18181	0.823001	0.960026	0.321679	0.974544	-7.4245	-5.50611	-7.4245	1.28041	1.11621	1.14589	1.57801	1.34051	0.532255	2.17162	3.47108
1	Ntome_NODE_10131_length_2181_cov_258	.	1.11579	1.45304	0.0114253	0.222981	-0.378141	0.287439	-4.15206	-4.23612	-5.23612	1.44996	0.464595	0.933803	1.22331	1.47826	0.892954	1.96355	2.50534
1	Ntome_NODE_10132_length_2181_cov_79	Y1719_ARATH^Y1719_ARATH^Q:2018-267,H:25-599^65.812%ID^E:0^RecName: Full=Probable inactive receptor kinase At1g27190;^Eukaryota; Viridiplantae; Streptophyta; Embryophyta; Tracheophyta; Spermatophyta; Magnoliopsida; eudicotyledons; Gunneridae; Pentapetalae; rosids; malvids; Brassicales; Brassicaceae; Camelineae; Arabidopsis	2.13804	1.97846	0.194833	0.80574	0.59798	-0.173993	-4.36619	-5.36619	-5.36619	1.23863	1.01665	0.109871	1.29801	1.29417	0.852594	0.841511	2.90607
1	Ntome_NODE_10133_length_2181_cov_49	TMVRN_NICGU^TMVRN_NICGU^Q:714-1004,H:522-616^59.794%ID^E:8.67e-22^RecName: Full=TMV resistance protein N;^Eukaryota; Viridiplantae; Streptophyta; Embryophyta; Tracheophyta; Spermatophyta; Magnoliopsida; eudicotyledons; Gunneridae; Pentapetalae; asterids; lamiids; Solanales; Solanaceae; Nicotianoideae; Nicotianeae; Nicotiana	0.898554	1.09601	0.898904	0.188888	-0.0250304	0.488878	-2.88036	-2.46532	-2.46532	1.87453	0.289569	0.0563608	-4.46532	0.926999	0.289569	2.32611	2.96697
1	Ntome_NODE_10135_length_2180_cov_285	ICDHP_ARATH^ICDHP_ARATH^Q:1785-448,H:43-485^80.537%ID^E:0^RecName: Full=Isocitrate dehydrogenase [NADP], chloroplastic/mitochondrial;^Eukaryota; Viridiplantae; Streptophyta; Embryophyta; Tracheophyta; Spermatophyta; Magnoliopsida; eudicotyledons; Gunneridae; Pentapetalae; rosids; malvids; Brassicales; Brassicaceae; Camelineae; Arabidopsis	2.89525	2.9426	1.37797	1.32447	1.18541	1.12995	-8.10544	-6.66183	-8.10544	1.0457	0.964573	0.632111	1.31496	1.36074	1.01111	2.5863	3.10157
1	Ntome_NODE_10136_length_2180_cov_274	GGT2_ARATH^GGT2_ARATH^Q:1704-262,H:1-481^86.902%ID^E:0^RecName: Full=Glutamate--glyoxylate aminotransferase 2;^Eukaryota; Viridiplantae; Streptophyta; Embryophyta; Tracheophyta; Spermatophyta; Magnoliopsida; eudicotyledons; Gunneridae; Pentapetalae; rosids; malvids; Brassicales; Brassicaceae; Camelineae; Arabidopsis	2.07837	1.87297	0.167906	0.618345	-0.0769838	0.779702	-5.78029	-5.56392	-6.26725	1.02604	1.26743	1.0176	1.83065	0.76039	0.696259	2.30692	3.26587
1	Ntome_NODE_10137_length_2180_cov_118	C82C4_ARATH^C82C4_ARATH^Q:1025-414,H:317-523^55.072%ID^E:9.35e-71^RecName: Full=Xanthotoxin 5-hydroxylase CYP82C4 {ECO:0000305|PubMed:18291319};^Eukaryota; Viridiplantae; Streptophyta; Embryophyta; Tracheophyta; Spermatophyta; Magnoliopsida; eudicotyledons; Gunneridae; Pentapetalae; rosids; malvids; Brassicales; Brassicaceae; Camelineae; Arabidopsis	3.70843	2.93522	2.15183	1.68749	0.785744	1.47575	-5.45971	-4.46694	-5.45971	0.700562	0.69733	0.660473	1.14421	1.03246	-0.630371	-0.618243	-0.344513
1	Ntome_NODE_10138_length_2180_cov_79	ATPI_VITVI^ATPI_VITVI^Q:1434-1291,H:111-158^79.167%ID^E:1.99e-13^RecName: Full=ATP synthase subunit a, chloroplastic {ECO:0000255|HAMAP-Rule:MF_01393};^Eukaryota; Viridiplantae; Streptophyta; Embryophyta; Tracheophyta; Spermatophyta; Magnoliopsida; eudicotyledons; Gunneridae; Pentapetalae; rosids; Vitales; Vitaceae; Viteae; Vitis	2.01876	1.95247	0.0563945	1.05531	-0.106873	-0.0160882	-3.26553	-4.26553	-4.26553	0.378323	0.194554	0.59195	1.25771	1.01913	0.48775	0.94392	1.96329
1	Ntome_NODE_10139_length_2180_cov_70	OBE1_ARATH^OBE1_ARATH^Q:796-1251,H:197-345^26.752%ID^E:5.51e-08^RecName: Full=Protein OBERON 1 {ECO:0000303|PubMed:18403411};^Eukaryota; Viridiplantae; Streptophyta; Embryophyta; Tracheophyta; Spermatophyta; Magnoliopsida; eudicotyledons; Gunneridae; Pentapetalae; rosids; malvids; Brassicales; Brassicaceae; Camelineae; Arabidopsis	1.39143	1.03451	-1.02496	0.477543	-0.0213552	0.390982	-3.60992	-3.60992	-3.60992	0.0905198	1.43491	0.638008	0.850167	0.560005	0.477543	2.118	2.41245
1	Ntome_NODE_1014_length_5071_cov_179	CIP7_ARATH^CIP7_ARATH^Q:540-1151,H:1-218^38.182%ID^E:1.88e-31^RecName: Full=COP1-interacting protein 7 {ECO:0000303|PubMed:9668129};^Eukaryota; Viridiplantae; Streptophyta; Embryophyta; Tracheophyta; Spermatophyta; Magnoliopsida; eudicotyledons; Gunneridae; Pentapetalae; rosids; malvids; Brassicales; Brassicaceae; Camelineae; Arabidopsis	0.28485	0.260995	-0.66011	0.45767	0.437088	0.569342	-3.65174	-3.19212	-4.00797	1.03548	0.545404	0.59752	0.87085	0.863828	-0.000281828	2.50183	3.08737
1	Ntome_NODE_10140_length_2179_cov_299	ACLB1_ORYSJ^ACLB1_ORYSJ^Q:24-1847,H:1-608^91.941%ID^E:0^RecName: Full=ATP-citrate synthase beta chain protein 1;^Eukaryota; Viridiplantae; Streptophyta; Embryophyta; Tracheophyta; Spermatophyta; Magnoliopsida; Liliopsida; Poales; Poaceae; BOP clade; Oryzoideae; Oryzeae; Oryzinae; Oryza; Oryza sativa	2.12917	2.01303	0.194673	1.28056	1.13377	1.1802	-9.51562	-6.24359	-8.08266	1.88521	1.71052	1.51475	2.06505	1.51173	1.34135	2.89091	2.99093
1	Ntome_NODE_10141_length_2179_cov_241	FGT1_ARATH^FGT1_ARATH^Q:1909-2,H:26-698^68.202%ID^E:0^RecName: Full=Protein FORGETTER 1 {ECO:0000303|PubMed:27680998};^Eukaryota; Viridiplantae; Streptophyta; Embryophyta; Tracheophyta; Spermatophyta; Magnoliopsida; eudicotyledons; Gunneridae; Pentapetalae; rosids; malvids; Brassicales; Brassicaceae; Camelineae; Arabidopsis	2.45486	2.27884	0.39925	0.0957646	0.616423	-0.237533	-6.52497	-4.34546	-5.36792	1.7026	1.36797	1.07159	0.969927	0.806217	0.909076	2.30491	1.49845
1	Ntome_NODE_10142_length_2179_cov_238	PIA2_ARATH^PIA2_ARATH^Q:1331-1777,H:9-157^66.443%ID^E:5.17e-64^RecName: Full=Phytochrome-interacting ankyrin-repeat protein 2 {ECO:0000303|PubMed:21395597};^Eukaryota; Viridiplantae; Streptophyta; Embryophyta; Tracheophyta; Spermatophyta; Magnoliopsida; eudicotyledons; Gunneridae; Pentapetalae; rosids; malvids; Brassicales; Brassicaceae; Camelineae; Arabidopsis	1.65003	1.65671	0.444431	0.774695	0.684015	0.840646	-7.22143	-5.80491	-6.03177	1.2382	1.11181	1.10195	1.78454	1.42358	1.41983	2.00522	2.92247
1	Ntome_NODE_10144_length_2179_cov_38	PP193_ARATH^PP193_ARATH^Q:447-1478,H:110-453^37.791%ID^E:9.07e-75^RecName: Full=Pentatricopeptide repeat-containing protein At2g38420, mitochondrial;^Eukaryota; Viridiplantae; Streptophyta; Embryophyta; Tracheophyta; Spermatophyta; Magnoliopsida; eudicotyledons; Gunneridae; Pentapetalae; rosids; malvids; Brassicales; Brassicaceae; Camelineae; Arabidopsis`PP193_ARATH^PP193_ARATH^Q:152-439,H:13-106…	1.80192	1.42103	0.650183	-0.38632	0.484538	-0.155195	-3.38632	-2.38632	-3.38632	0.145997	0.31412	0.198642	0.0744224	1.47166	-0.942714	1.82313	2.25754
1	Ntome_NODE_10145_length_2179_cov_24	.	1.00002	0.584981	2.19642	-0.415019	-0.999981	0.115496	-3.58494	-2.58494	-0.777589	0.115496	0.415056	1.87127e-05	0.807374	1.22961	0.222411	0.736984	0.938618
1	Ntome_NODE_10146_length_2178_cov_252	TDT_ARATH^TDT_ARATH^Q:123-1703,H:1-536^71.747%ID^E:0^RecName: Full=Tonoplast dicarboxylate transporter;^Eukaryota; Viridiplantae; Streptophyta; Embryophyta; Tracheophyta; Spermatophyta; Magnoliopsida; eudicotyledons; Gunneridae; Pentapetalae; rosids; malvids; Brassicales; Brassicaceae; Camelineae; Arabidopsis	0.854651	1.06089	1.37333	0.732315	0.473929	-0.0293946	-3.48883	-2.13641	-3.79451	0.353778	-0.716578	1.03575	-1.53749	-0.151572	2.17561	0.992091	2.80243
1	Ntome_NODE_10147_length_2178_cov_232	LRK10_WHEAT^LRK10_WHEAT^Q:1170-154,H:283-626^54.335%ID^E:3.67e-118^RecName: Full=Rust resistance kinase Lr10 {ECO:0000312|EMBL:AAC49629.1};^Eukaryota; Viridiplantae; Streptophyta; Embryophyta; Tracheophyta; Spermatophyta; Magnoliopsida; Liliopsida; Poales; Poaceae; BOP clade; Pooideae; Triticodae; Triticeae; Triticinae; Triticum	2.51867	2.3028	1.20019	0.92827	0.733381	0.564945	-4.47369	-3.21122	-5.56454	-0.0842793	-0.242616	-0.563193	0.561437	-0.178423	-0.920688	2.88901	3.53995
1	Ntome_NODE_10148_length_2178_cov_194	UBC32_ARATH^UBC32_ARATH^Q:1009-356,H:82-307^52.083%ID^E:1.06e-65^RecName: Full=Ubiquitin-conjugating enzyme E2 32;^Eukaryota; Viridiplantae; Streptophyta; Embryophyta; Tracheophyta; Spermatophyta; Magnoliopsida; eudicotyledons; Gunneridae; Pentapetalae; rosids; malvids; Brassicales; Brassicaceae; Camelineae; Arabidopsis`UBC32_ARATH^UBC32_ARATH^Q:1953-1720,H:1-78^89.744%ID^E:1.92e-40^RecName: Full…	1.90126	1.65823	0.0171136	0.665445	0.271637	0.520553	-3.12949	-4.06207	-4.9281	0.575381	0.28989	0.777287	0.774946	0.5548	0.234917	1.67335	2.20485
1	Ntome_NODE_1015_length_5071_cov_80	UKL1_ARATH^UKL1_ARATH^Q:817-416,H:350-483^93.284%ID^E:1.07e-64^RecName: Full=Uridine kinase-like protein 1, chloroplastic;^Eukaryota; Viridiplantae; Streptophyta; Embryophyta; Tracheophyta; Spermatophyta; Magnoliopsida; eudicotyledons; Gunneridae; Pentapetalae; rosids; malvids; Brassicales; Brassicaceae; Camelineae; Arabidopsis	1.80949	1.7406	0.711364	0.636791	-0.390477	0.818446	-5.50276	-4.44618	-3.8566	0.405812	0.145705	0.64719	1.3091	1.07949	0.197957	1.99269	2.70137
1	Ntome_NODE_10150_length_2177_cov_45	.	0.606484	-0.493052	-1.30041	-0.493052	0.506948	0.0215213	-3.30041	-3.30041	-3.30041	1.34345	0.0215213	1.15902	1.65379	1.60648	1.65379	1.55757	2.05715
1	Ntome_NODE_10151_length_2177_cov_254	SG101_ARATH^SG101_ARATH^Q:245-1957,H:9-531^35.98%ID^E:1.49e-85^RecName: Full=Senescence-associated carboxylesterase 101;^Eukaryota; Viridiplantae; Streptophyta; Embryophyta; Tracheophyta; Spermatophyta; Magnoliopsida; eudicotyledons; Gunneridae; Pentapetalae; rosids; malvids; Brassicales; Brassicaceae; Camelineae; Arabidopsis	1.37526	1.11501	0.431753	0.387154	-0.0461243	0.423517	-6.48973	-6.48973	-4.44709	1.80282	0.736489	0.937121	2.1405	1.69232	1.46307	2.10646	2.86121
1	Ntome_NODE_10153_length_2177_cov_159	NFD4_ARATH^NFD4_ARATH^Q:163-1770,H:43-565^24.91%ID^E:7.36e-30^RecName: Full=Protein NUCLEAR FUSION DEFECTIVE 4 {ECO:0000303|PubMed:16698901};^Eukaryota; Viridiplantae; Streptophyta; Embryophyta; Tracheophyta; Spermatophyta; Magnoliopsida; eudicotyledons; Gunneridae; Pentapetalae; rosids; malvids; Brassicales; Brassicaceae; Camelineae; Arabidopsis	0.492534	0.894986	-0.391676	0.907572	-0.74712	0.942039	-4.50521	-3.34171	-4.50521	0.938728	0.85199	0.667118	1.79125	1.45154	0.797475	0.921055	2.83464
1	Ntome_NODE_10154_length_2177_cov_113	JA2_SOLLC^JA2_SOLLC^Q:1680-1252,H:24-164^39.597%ID^E:8.3e-22^RecName: Full=NAC domain-containing protein JA2 {ECO:0000305};^Eukaryota; Viridiplantae; Streptophyta; Embryophyta; Tracheophyta; Spermatophyta; Magnoliopsida; eudicotyledons; Gunneridae; Pentapetalae; asterids; lamiids; Solanales; Solanaceae; Solanoideae; Solaneae; Solanum; Lycopersicon	1.48915	1.65197	0.0434748	0.544071	-0.07694	-0.234984	-4.92092	-4.92092	-2.77036	0.895932	0.953873	0.481321	1.47619	1.03164	1.00792	1.43663	1.91197
1	Ntome_NODE_10155_length_2177_cov_106	CYSKP_CAPAN^CYSKP_CAPAN^Q:664-434,H:296-372^94.805%ID^E:1.32e-23^RecName: Full=Cysteine synthase, chloroplastic/chromoplastic;^Eukaryota; Viridiplantae; Streptophyta; Embryophyta; Tracheophyta; Spermatophyta; Magnoliopsida; eudicotyledons; Gunneridae; Pentapetalae; asterids; lamiids; Solanales; Solanaceae; Solanoideae; Capsiceae; Capsicum	1.33684	1.67484	0.454309	0.251743	-0.0262989	0.622843	-6.36561	-6.36561	-4.04369	1.12608	1.20234	0.61281	2.12255	0.875749	1.1402	2.14586	3.23506
1	Ntome_NODE_10156_length_2177_cov_66	RNHX1_ARATH^RNHX1_ARATH^Q:1197-811,H:1-129^32.558%ID^E:1.73e-15^RecName: Full=Putative ribonuclease H protein At1g65750;^Eukaryota; Viridiplantae; Streptophyta; Embryophyta; Tracheophyta; Spermatophyta; Magnoliopsida; eudicotyledons; Gunneridae; Pentapetalae; rosids; malvids; Brassicales; Brassicaceae; Camelineae; Arabidopsis	1.61025	1.87891	0.630986	1.21595	-0.268597	-0.291771	-4.95398	-4.95398	-4.95398	1.04602	0.876887	0.265192	1.51932	0.904004	1.6672	1.92867	1.87891
1	Ntome_NODE_10158_length_2176_cov_176	SYHC_ARATH^SYHC_ARATH^Q:1805-876,H:127-451^41.896%ID^E:2.19e-41^RecName: Full=Histidine--tRNA ligase, cytoplasmic {ECO:0000305};^Eukaryota; Viridiplantae; Streptophyta; Embryophyta; Tracheophyta; Spermatophyta; Magnoliopsida; eudicotyledons; Gunneridae; Pentapetalae; rosids; malvids; Brassicales; Brassicaceae; Camelineae; Arabidopsis`SYHC_ARATH^SYHC_ARATH^Q:223-2,H:442-516^81.333%ID^E:6.11e-30^Re…	2.31322	2.32042	0.656631	0.666416	0.539056	0.417206	-6.51329	-4.6613	-5.49181	1.18902	0.302281	0.85495	1.04068	1.21782	0.937505	1.65663	2.55457
1	Ntome_NODE_10159_length_2176_cov_137	TAR2_ARATH^TAR2_ARATH^Q:1400-135,H:14-433^52.582%ID^E:1.49e-150^RecName: Full=Tryptophan aminotransferase-related protein 2;^Eukaryota; Viridiplantae; Streptophyta; Embryophyta; Tracheophyta; Spermatophyta; Magnoliopsida; eudicotyledons; Gunneridae; Pentapetalae; rosids; malvids; Brassicales; Brassicaceae; Camelineae; Arabidopsis	0.735411	-0.913629	-0.315381	0.332829	-1.09849	0.650968	-4.48531	-4.48531	-4.48531	1.55603	1.4326	0.703333	1.55427	2.474	0.672142	2.88102	2.79082
1	Ntome_NODE_1016_length_5068_cov_307	CATA1_TOBAC^CATA1_TOBAC^Q:1751-276,H:1-492^99.39%ID^E:0^RecName: Full=Catalase isozyme 1;^Eukaryota; Viridiplantae; Streptophyta; Embryophyta; Tracheophyta; Spermatophyta; Magnoliopsida; eudicotyledons; Gunneridae; Pentapetalae; asterids; lamiids; Solanales; Solanaceae; Nicotianoideae; Nicotianeae; Nicotiana	1.99812	2.16844	0.921403	0.898351	0.602792	0.660466	-5.39546	-5.2115	-5.54482	1.42519	1.04637	0.768241	0.980181	1.21579	1.2296	0.230862	2.00597
1	Ntome_NODE_10161_length_2176_cov_39	.	-0.130641	-0.782718	0.802244	0.868046	-0.00511055	0.579852	-3.59007	-2.59007	-3.59007	0.657854	0.955895	0.312965	2.51845	0.657854	-0.268145	1.83619	1.76748
1	Ntome_NODE_10163_length_2175_cov_282	EDR2L_ARATH^EDR2L_ARATH^Q:1146-418,H:503-708^24.797%ID^E:8.43e-09^RecName: Full=Protein ENHANCED DISEASE RESISTANCE 2-like;^Eukaryota; Viridiplantae; Streptophyta; Embryophyta; Tracheophyta; Spermatophyta; Magnoliopsida; eudicotyledons; Gunneridae; Pentapetalae; rosids; malvids; Brassicales; Brassicaceae; Camelineae; Arabidopsis	1.1893	1.24182	0.621791	-0.191486	-0.0223932	0.772156	-5.46217	-4.66962	-5.58266	1.73989	0.831507	1.50525	1.78313	1.35049	0.682478	1.79026	2.42027
1	Ntome_NODE_10164_length_2175_cov_263	TLDC2_HUMAN^TLDC2_HUMAN^Q:1098-703,H:83-212^39.098%ID^E:2.78e-18^RecName: Full=TLD domain-containing protein 2;^Eukaryota; Metazoa; Chordata; Craniata; Vertebrata; Euteleostomi; Mammalia; Eutheria; Euarchontoglires; Primates; Haplorrhini; Catarrhini; Hominidae; Homo	1.3158	1.40583	0.26436	-0.133037	0.203917	0.468194	-4.67781	-5.01409	-6.01409	1.18607	1.16348	1.1035	2.00508	1.61078	1.16642	1.81551	2.13008
1	Ntome_NODE_10166_length_2175_cov_246	IDD10_ARATH^IDD10_ARATH^Q:124-663,H:52-237^86.022%ID^E:1.21e-99^RecName: Full=Zinc finger protein JACKDAW {ECO:0000303|PubMed:17785527};^Eukaryota; Viridiplantae; Streptophyta; Embryophyta; Tracheophyta; Spermatophyta; Magnoliopsida; eudicotyledons; Gunneridae; Pentapetalae; rosids; malvids; Brassicales; Brassicaceae; Camelineae; Arabidopsis	1.85933	1.50244	0.551935	1.17121	0.367813	1.23521	-5.35919	-5.61015	-5.61015	0.942131	0.928229	0.342646	1.65944	0.692896	0.941977	1.82447	2.55977
1	Ntome_NODE_10167_length_2175_cov_209	.	1.24764	1.28954	-0.144015	1.1264	0.745708	0.533899	-6.24036	-5.23317	-6.24036	1.54545	1.33948	0.939249	1.61973	1.33714	0.360592	2.49773	3.27534
1	Ntome_NODE_10168_length_2175_cov_148	RK5_SPIOL^RK5_SPIOL^Q:1859-1182,H:32-257^73.568%ID^E:1.54e-118^RecName: Full=50S ribosomal protein L5, chloroplastic {ECO:0000303|PubMed:10874046};^Eukaryota; Viridiplantae; Streptophyta; Embryophyta; Tracheophyta; Spermatophyta; Magnoliopsida; eudicotyledons; Gunneridae; Pentapetalae; Caryophyllales; Chenopodiaceae; Chenopodioideae; Anserineae; Spinacia	1.05775	1.24591	0.37259	-0.0491087	-0.588489	0.0677403	-4.7415	-4.09612	-5.1536	0.797625	0.7581	0.667785	1.75855	0.672823	0.804119	2.49295	3.93288
1	Ntome_NODE_10169_length_2175_cov_135	AIR9_ARATH^AIR9_ARATH^Q:990-304,H:1480-1708^81.659%ID^E:1.29e-120^RecName: Full=187-kDa microtubule-associated protein AIR9 {ECO:0000303|PubMed:17027491};^Eukaryota; Viridiplantae; Streptophyta; Embryophyta; Tracheophyta; Spermatophyta; Magnoliopsida; eudicotyledons; Gunneridae; Pentapetalae; rosids; malvids; Brassicales; Brassicaceae; Camelineae; Arabidopsis`AIR9_ARATH^AIR9_ARATH^Q:999-706,H:107…	1.84453	1.5192	1.11482	0.652409	0.0831369	0.624603	-6.05149	-5.05149	-6.05149	0.966761	0.543203	0.875928	1.80854	1.47637	0.216228	2.43127	2.99748
1	Ntome_NODE_1017_length_5067_cov_174	GNOM_ARATH^GNOM_ARATH^Q:206-4510,H:1-1443^64.869%ID^E:0^RecName: Full=ARF guanine-nucleotide exchange factor GNOM;^Eukaryota; Viridiplantae; Streptophyta; Embryophyta; Tracheophyta; Spermatophyta; Magnoliopsida; eudicotyledons; Gunneridae; Pentapetalae; rosids; malvids; Brassicales; Brassicaceae; Camelineae; Arabidopsis	1.69785	1.4097	0.0734844	-0.00112717	-0.454926	0.409601	-3.74743	-2.98525	-5.85512	0.661838	-0.154406	0.406408	1.24984	1.35706	0.572819	2.18413	3.17554
1	Ntome_NODE_10170_length_2175_cov_92	.	-1.35208	1.55545	0.969844	-0.352084	0.062953	-0.937047	-2.93705	-2.93705	-2.93705	-0.0593027	0.062953	1.23448	0.522385	-0.352084	1.31088	3.43799	2.70681
1	Ntome_NODE_10171_length_2175_cov_28	4ON1_ARATH^4ON1_ARATH^Q:699-271,H:102-244^48.951%ID^E:1.74e-35^RecName: Full=Protein At-4/1;^Eukaryota; Viridiplantae; Streptophyta; Embryophyta; Tracheophyta; Spermatophyta; Magnoliopsida; eudicotyledons; Gunneridae; Pentapetalae; rosids; malvids; Brassicales; Brassicaceae; Camelineae; Arabidopsis`4ON1_ARATH^4ON1_ARATH^Q:1980-1762,H:1-73^53.425%ID^E:1.02e-14^RecName: Full=Protein At-4/1;^Eukaryo…	1.79777	0.672387	0.343097	0.31833	-0.20986	1.08057	-3.92916	-3.32965	-4.62823	0.971863	0.659222	0.924554	1.88581	-0.0153424	-0.195975	1.8456	1.80902
1	Ntome_NODE_10172_length_2175_cov_23	BH123_ARATH^BH123_ARATH^Q:406-1500,H:55-454^40.334%ID^E:1.16e-58^RecName: Full=Transcription factor bHLH123;^Eukaryota; Viridiplantae; Streptophyta; Embryophyta; Tracheophyta; Spermatophyta; Magnoliopsida; eudicotyledons; Gunneridae; Pentapetalae; rosids; malvids; Brassicales; Brassicaceae; Camelineae; Arabidopsis	1.90107	1.71914	1.18835	0.876403	0.603385	0.0184224	-3.98158	-2.98158	-2.98158	0.0193238	-0.281138	-0.173193	0.34035	-0.0756491	-0.396615	1.90107	2.30382
1	Ntome_NODE_10173_length_2174_cov_284	CBSX6_ARATH^CBSX6_ARATH^Q:642-1844,H:1-404^68.293%ID^E:3.24e-175^RecName: Full=CBS domain-containing protein CBSX6;^Eukaryota; Viridiplantae; Streptophyta; Embryophyta; Tracheophyta; Spermatophyta; Magnoliopsida; eudicotyledons; Gunneridae; Pentapetalae; rosids; malvids; Brassicales; Brassicaceae; Camelineae; Arabidopsis	2.27941	1.84724	0.277324	1.09844	0.35201	0.788261	-6.73937	-5.56305	-6.44071	1.52723	0.969159	1.07895	1.56354	1.07748	1.49362	2.16186	2.2286
1	Ntome_NODE_10174_length_2174_cov_281	RH39_ARATH^RH39_ARATH^Q:2041-323,H:35-614^68.089%ID^E:0^RecName: Full=DEAD-box ATP-dependent RNA helicase 39;^Eukaryota; Viridiplantae; Streptophyta; Embryophyta; Tracheophyta; Spermatophyta; Magnoliopsida; eudicotyledons; Gunneridae; Pentapetalae; rosids; malvids; Brassicales; Brassicaceae; Camelineae; Arabidopsis	2.01851	1.9232	0.530572	0.283146	0.257772	-0.0842839	-6.06129	-4.17593	-4.16513	0.761874	0.962177	0.905958	1.25752	0.683756	0.34655	1.97248	2.58312
1	Ntome_NODE_10175_length_2174_cov_190	AHL5_ARATH^AHL5_ARATH^Q:1208-1804,H:159-378^51.131%ID^E:4.1e-48^RecName: Full=AT-hook motif nuclear-localized protein 5 {ECO:0000312|EMBL:FAA00276.1};^Eukaryota; Viridiplantae; Streptophyta; Embryophyta; Tracheophyta; Spermatophyta; Magnoliopsida; eudicotyledons; Gunneridae; Pentapetalae; rosids; malvids; Brassicales; Brassicaceae; Camelineae; Arabidopsis	2.31887	1.87985	0.761022	0.89861	0.65256	0.459709	-6.36836	-6.36836	-6.36836	1.40708	1.29519	0.885625	1.64353	1.72946	0.832191	1.72967	2.61172
1	Ntome_NODE_10176_length_2174_cov_93	C93A2_SOYBN^C93A2_SOYBN^Q:350-1732,H:39-497^40.171%ID^E:4.65e-101^RecName: Full=Cytochrome P450 93A2;^Eukaryota; Viridiplantae; Streptophyta; Embryophyta; Tracheophyta; Spermatophyta; Magnoliopsida; eudicotyledons; Gunneridae; Pentapetalae; rosids; fabids; Fabales; Fabaceae; Papilionoideae; 50 kb inversion clade; NPAAA clade; indigoferoid/millettioid clade; Phaseoleae; Glycine; Soja	1.07178	0.808111	0.498306	-0.316465	-0.66042	0.476844	-3.10932	-2.10213	-3.10932	0.503032	0.0525671	1.16718	0.379965	0.597762	0.0590005	1.70369	1.97941
1	Ntome_NODE_10177_length_2174_cov_25	PRRP1_ARATH^PRRP1_ARATH^Q:126-230,H:195-229^65.714%ID^E:9.03e-06^RecName: Full=Proteinaceous RNase P 1, chloroplastic/mitochondrial;^Eukaryota; Viridiplantae; Streptophyta; Embryophyta; Tracheophyta; Spermatophyta; Magnoliopsida; eudicotyledons; Gunneridae; Pentapetalae; rosids; malvids; Brassicales; Brassicaceae; Camelineae; Arabidopsis	0.427773	-1.0868	-0.572227	0.806285	0.427773	0.963826	-3.89415	-2.89415	-3.89415	0.88563	0.105845	0.427773	1.53211	0.9132	0.749701	2.15024	2.95134
1	Ntome_NODE_10179_length_2173_cov_269	MDHM2_ARATH^MDHM2_ARATH^Q:1957-941,H:1-340^86.471%ID^E:0^RecName: Full=Malate dehydrogenase 2, mitochondrial {ECO:0000305};^Eukaryota; Viridiplantae; Streptophyta; Embryophyta; Tracheophyta; Spermatophyta; Magnoliopsida; eudicotyledons; Gunneridae; Pentapetalae; rosids; malvids; Brassicales; Brassicaceae; Camelineae; Arabidopsis	2.39793	2.39557	0.400321	1.47153	1.01402	0.732234	-7.36105	-6.91835	-8.98136	1.77707	1.73821	1.39228	1.64914	1.73275	1.55892	2.19277	2.80801
1	Ntome_NODE_1018_length_5065_cov_167	YCED2_ARATH^YCED2_ARATH^Q:1005-1613,H:7-228^52.679%ID^E:1.5e-68^RecName: Full=Large ribosomal RNA subunit accumulation protein YCED homolog 2, chloroplastic {ECO:0000305};^Eukaryota; Viridiplantae; Streptophyta; Embryophyta; Tracheophyta; Spermatophyta; Magnoliopsida; eudicotyledons; Gunneridae; Pentapetalae; rosids; malvids; Brassicales; Brassicaceae; Camelineae; Arabidopsis	1.82557	1.68755	0.667152	1.11743	0.618824	0.739436	-7.14033	-6.13314	-6.13314	1.32262	1.23075	0.939847	1.81517	1.14858	1.07554	2.11203	3.1061
1	Ntome_NODE_10180_length_2173_cov_214	.	0.987146	1.11516	-0.135045	0.356635	0.133909	0.385482	-3.93686	-2.62497	-3.05721	0.684246	0.615698	0.169797	0.70504	0.845276	0.272976	1.33566	2.14706
1	Ntome_NODE_10181_length_2174_cov_193	.	0.667617	0.931182	-1.1224	0.876339	0.954094	0.228143	-4.43746	-4.42836	-6.09739	1.71806	1.58757	0.731194	1.4689	1.4286	1.06863	1.84513	2.58016
1	Ntome_NODE_10183_length_2173_cov_130	LEU1A_SOLPN^LEU1A_SOLPN^Q:250-1917,H:26-580^72.172%ID^E:0^RecName: Full=2-isopropylmalate synthase A;^Eukaryota; Viridiplantae; Streptophyta; Embryophyta; Tracheophyta; Spermatophyta; Magnoliopsida; eudicotyledons; Gunneridae; Pentapetalae; asterids; lamiids; Solanales; Solanaceae; Solanoideae; Solaneae; Solanum; Lycopersicon	2.70538	2.60874	0.810124	1.33751	0.714671	0.637657	-8.50955	-5.70219	-6.92459	1.50308	1.8817	1.39584	1.91986	1.33594	1.16641	1.07917	2.04026
1	Ntome_NODE_10184_length_2173_cov_126	.	1.41819	1.63229	0.817944	1.31321	1.52804	0.894013	-5.04909	-6.04909	-6.04909	1.26878	0.214323	0.0170017	1.07234	1.13896	1.36022	2.26606	2.20589
1	Ntome_NODE_10185_length_2173_cov_109	PP388_ARATH^PP388_ARATH^Q:1981-509,H:30-525^58.871%ID^E:0^RecName: Full=Pentatricopeptide repeat-containing protein At5g16420, mitochondrial;^Eukaryota; Viridiplantae; Streptophyta; Embryophyta; Tracheophyta; Spermatophyta; Magnoliopsida; eudicotyledons; Gunneridae; Pentapetalae; rosids; malvids; Brassicales; Brassicaceae; Camelineae; Arabidopsis	0.892274	0.763616	-0.402444	0.493382	0.23839	-0.247572	-5.3636	-4.28636	-5.3636	1.82583	1.58803	1.25918	1.76846	1.59732	1.19711	2.03728	2.00272
1	Ntome_NODE_10187_length_2173_cov_68	TIF8_ARATH^TIF8_ARATH^Q:1526-648,H:28-265^37.38%ID^E:1.94e-36^RecName: Full=Protein TIFY 8 {ECO:0000303|PubMed:17499004};^Eukaryota; Viridiplantae; Streptophyta; Embryophyta; Tracheophyta; Spermatophyta; Magnoliopsida; eudicotyledons; Gunneridae; Pentapetalae; rosids; malvids; Brassicales; Brassicaceae; Camelineae; Arabidopsis	1.94683	2.0216	0.533877	0.607341	0.287605	1.07744	-5.06395	-5.06395	-5.06395	0.989376	0.63621	0.720813	1.70965	0.677514	0.339997	1.25635	2.38726
1	Ntome_NODE_10188_length_2172_cov_295	RH18_ARATH^RH18_ARATH^Q:2162-468,H:27-593^69.772%ID^E:0^RecName: Full=DEAD-box ATP-dependent RNA helicase 18;^Eukaryota; Viridiplantae; Streptophyta; Embryophyta; Tracheophyta; Spermatophyta; Magnoliopsida; eudicotyledons; Gunneridae; Pentapetalae; rosids; malvids; Brassicales; Brassicaceae; Camelineae; Arabidopsis	1.28866	0.791697	0.104248	1.00989	0.856834	1.39986	-6.84797	-6.69741	-5.8194	1.52398	1.18027	0.963502	1.96898	1.65231	1.30041	2.44421	2.87992
1	Ntome_NODE_10189_length_2172_cov_266	WDL7_ARATH^WDL7_ARATH^Q:2080-1889,H:14-72^64.062%ID^E:6.74e-17^RecName: Full=Protein WVD2-like 7 {ECO:0000305};^Eukaryota; Viridiplantae; Streptophyta; Embryophyta; Tracheophyta; Spermatophyta; Magnoliopsida; eudicotyledons; Gunneridae; Pentapetalae; rosids; malvids; Brassicales; Brassicaceae; Camelineae; Arabidopsis	1.98863	1.64563	0.850258	0.575157	0.360965	1.32335	-6.92453	-5.92453	-5.33957	1.35029	1.06722	0.782623	1.78941	1.19218	0.417901	1.91467	2.93034
1	Ntome_NODE_1019_length_5065_cov_28	.	1.26489	1.0825	0.859304	0.149612	0.597071	0.158764	-2.30982	-3.30982	-3.30982	0.777643	-1.26718	0.0121084	1.01211	0.400573	-0.987892	2.18203	2.68792
1	Ntome_NODE_10190_length_2172_cov_262	ALA4_ARATH^ALA4_ARATH^Q:1147-2,H:1-381^71.279%ID^E:0^RecName: Full=Probable phospholipid-transporting ATPase 4 {ECO:0000303|PubMed:11402198};^Eukaryota; Viridiplantae; Streptophyta; Embryophyta; Tracheophyta; Spermatophyta; Magnoliopsida; eudicotyledons; Gunneridae; Pentapetalae; rosids; malvids; Brassicales; Brassicaceae; Camelineae; Arabidopsis	1.45165	1.33919	0.417561	-0.76328	-0.590228	0.184357	-3.38824	-4.68646	-3.9495	1.21328	0.888444	0.609857	-0.00464074	1.21971	0.694613	3.09329	2.2704
1	Ntome_NODE_10191_length_2172_cov_233	AASS_ARATH^AASS_ARATH^Q:2-307,H:677-778^78.431%ID^E:1.55e-33^RecName: Full=Alpha-aminoadipic semialdehyde synthase;^Eukaryota; Viridiplantae; Streptophyta; Embryophyta; Tracheophyta; Spermatophyta; Magnoliopsida; eudicotyledons; Gunneridae; Pentapetalae; rosids; malvids; Brassicales; Brassicaceae; Camelineae; Arabidopsis`AASS_ARATH^AASS_ARATH^Q:1512-1679,H:804-859^71.429%ID^E:1.02e-17^RecName: Fu…	1.33085	1.37087	-0.492755	-0.222678	-1.14755	-0.532743	-3.01717	-2.54784	-2.51979	0.629933	-0.284131	1.02595	1.46262	0.819892	1.22973	0.881481	2.01332
1	Ntome_NODE_10192_length_2172_cov_226	DGK5_ARATH^DGK5_ARATH^Q:497-1915,H:12-484^75.052%ID^E:0^RecName: Full=Diacylglycerol kinase 5;^Eukaryota; Viridiplantae; Streptophyta; Embryophyta; Tracheophyta; Spermatophyta; Magnoliopsida; eudicotyledons; Gunneridae; Pentapetalae; rosids; malvids; Brassicales; Brassicaceae; Camelineae; Arabidopsis	1.58327	1.82648	-0.136586	1.08963	0.679479	0.552038	-6.28654	-6.28654	-5.0175	1.11809	0.778153	0.0881556	1.61379	1.43995	1.58598	2.62525	2.74689
1	Ntome_NODE_10193_length_2172_cov_163	C90B1_ARATH^C90B1_ARATH^Q:314-1018,H:33-292^71.648%ID^E:4.27e-125^RecName: Full=Cytochrome P450 90B1;^Eukaryota; Viridiplantae; Streptophyta; Embryophyta; Tracheophyta; Spermatophyta; Magnoliopsida; eudicotyledons; Gunneridae; Pentapetalae; rosids; malvids; Brassicales; Brassicaceae; Camelineae; Arabidopsis`C90B1_ARATH^C90B1_ARATH^Q:1054-1746,H:283-509^74.026%ID^E:1e-110^RecName: Full=Cytochrome …	1.73898	1.81344	0.869637	0.253692	0.1278	0.75456	-4.8921	-5.41817	-4.38254	0.871667	0.432081	0.701188	1.2568	1.14652	0.296627	1.87645	2.55338
1	Ntome_NODE_10196_length_2172_cov_28	CDC45_DICDI^CDC45_DICDI^Q:810-1934,H:239-633^33.415%ID^E:7.99e-65^RecName: Full=Cell division control protein 45 homolog;^Eukaryota; Amoebozoa; Mycetozoa; Dictyostelids; Dictyosteliales; Dictyosteliaceae; Dictyostelium	1.37663	1.31242	0.745416	0.295719	0.271636	0.228498	-2.90666	-2.69609	-3.97705	0.389621	0.859379	-1.97705	1.69679	0.148931	-0.0501022	1.99219	2.28974
1	Ntome_NODE_10197_length_2171_cov_297	PERX_SOLTU^PERX_SOLTU^Q:1264-257,H:24-363^77.419%ID^E:9.05e-167^RecName: Full=Suberization-associated anionic peroxidase;^Eukaryota; Viridiplantae; Streptophyta; Embryophyta; Tracheophyta; Spermatophyta; Magnoliopsida; eudicotyledons; Gunneridae; Pentapetalae; asterids; lamiids; Solanales; Solanaceae; Solanoideae; Solaneae; Solanum	2.43874	1.26445	-0.669115	0.253054	-0.37823	-0.0966343	-2.35863	-2.20818	-3.25673	0.270358	0.00183011	0.326708	0.728903	0.348534	-0.172268	1.50556	2.00165
1	Ntome_NODE_10198_length_2171_cov_277	NOP56_SCHPO^NOP56_SCHPO^Q:2008-689,H:1-449^58.98%ID^E:0^RecName: Full=Nucleolar protein 56;^Eukaryota; Fungi; Dikarya; Ascomycota; Taphrinomycotina; Schizosaccharomycetes; Schizosaccharomycetales; Schizosaccharomycetaceae; Schizosaccharomyces	1.22443	1.00414	0.309808	0.378833	-0.199984	0.649613	-3.62418	-2.55719	-3.46147	0.382523	0.71449	-0.0150121	0.897758	0.639082	-0.645874	1.88765	2.41538
1	Ntome_NODE_10199_length_2171_cov_242	WRKY6_ARATH^WRKY6_ARATH^Q:1868-480,H:80-527^55.901%ID^E:5.64e-127^RecName: Full=WRKY transcription factor 6 {ECO:0000303|PubMed:11722756};^Eukaryota; Viridiplantae; Streptophyta; Embryophyta; Tracheophyta; Spermatophyta; Magnoliopsida; eudicotyledons; Gunneridae; Pentapetalae; rosids; malvids; Brassicales; Brassicaceae; Camelineae; Arabidopsis	1.48571	1.21553	1.07783	0.556025	-0.282373	0.495837	-4.44668	-3.68965	-4.44668	0.523716	1.10607	0.448141	1.55016	0.803527	1.55265	0.879213	1.17097
1	Ntome_NODE_1020_length_5064_cov_272	STY8_ARATH^STY8_ARATH^Q:3591-4394,H:290-544^38.06%ID^E:2.03e-48^RecName: Full=Serine/threonine-protein kinase STY8 {ECO:0000305};^Eukaryota; Viridiplantae; Streptophyta; Embryophyta; Tracheophyta; Spermatophyta; Magnoliopsida; eudicotyledons; Gunneridae; Pentapetalae; rosids; malvids; Brassicales; Brassicaceae; Camelineae; Arabidopsis	2.10126	1.88527	1.51999	0.549963	0.644878	0.747198	-5.90792	-4.83963	-7.75992	1.10804	0.618849	0.643899	1.02687	1.20696	1.47386	2.61424	2.36621
1	Ntome_NODE_10200_length_2171_cov_154	CID4_ARATH^CID4_ARATH^Q:1893-1609,H:47-146^38%ID^E:6.99e-15^RecName: Full=Polyadenylate-binding protein-interacting protein 4;^Eukaryota; Viridiplantae; Streptophyta; Embryophyta; Tracheophyta; Spermatophyta; Magnoliopsida; eudicotyledons; Gunneridae; Pentapetalae; rosids; malvids; Brassicales; Brassicaceae; Camelineae; Arabidopsis	0.957087	0.83274	-0.368466	-0.123515	-0.447851	0.0369495	-2.72078	-1.62354	-1.75968	0.427812	-0.647241	-0.0185072	0.830484	0.636192	0.338856	1.3087	2.34076
1	Ntome_NODE_10201_length_2171_cov_73	DRP1E_ARATH^DRP1E_ARATH^Q:160-1989,H:4-624^73.591%ID^E:0^RecName: Full=Dynamin-related protein 1E;^Eukaryota; Viridiplantae; Streptophyta; Embryophyta; Tracheophyta; Spermatophyta; Magnoliopsida; eudicotyledons; Gunneridae; Pentapetalae; rosids; malvids; Brassicales; Brassicaceae; Camelineae; Arabidopsis	4.00089	4.05635	1.6624	1.83838	1.93915	1.43597	-3.93245	-3.93245	-3.93245	0.0142804	0.7641	-0.473019	0.131052	-0.24651	-1.10463	-0.610522	-1.61052
1	Ntome_NODE_10202_length_2171_cov_38	MB3R2_ORYSJ^MB3R2_ORYSJ^Q:1830-1258,H:64-260^59.091%ID^E:1.08e-76^RecName: Full=Transcription factor MYB3R-2 {ECO:0000305};^Eukaryota; Viridiplantae; Streptophyta; Embryophyta; Tracheophyta; Spermatophyta; Magnoliopsida; Liliopsida; Poales; Poaceae; BOP clade; Oryzoideae; Oryzeae; Oryzinae; Oryza; Oryza sativa	1.32316	1.39059	0.385187	-0.298667	-0.392421	0.769237	-3.19978	-3.19978	-3.19978	0.540073	0.957268	-0.105539	1.09962	0.523783	-0.0298504	1.32379	2.11311
1	Ntome_NODE_10203_length_2171_cov_31	.	1.25403	1.17906	0.179064	0.00913885	0.00913885	0.00913885	-2.99086	-2.99086	-2.99086	0.467258	0.709579	-0.668933	1.0579	0.331067	0.916029	1.86712	1.653
1	Ntome_NODE_10204_length_2170_cov_256	KTNA1_ARATH^KTNA1_ARATH^Q:1902-346,H:1-523^82.667%ID^E:0^RecName: Full=Katanin p60 ATPase-containing subunit A1 {ECO:0000255|HAMAP-Rule:MF_03023};^Eukaryota; Viridiplantae; Streptophyta; Embryophyta; Tracheophyta; Spermatophyta; Magnoliopsida; eudicotyledons; Gunneridae; Pentapetalae; rosids; malvids; Brassicales; Brassicaceae; Camelineae; Arabidopsis	1.66759	1.64607	-0.625124	0.0937662	0.504342	-0.205786	-4.68787	-3.59018	-4.67871	1.21037	1.06065	0.630606	1.20295	1.30973	0.619355	1.58301	2.25924
1	Ntome_NODE_10205_length_2170_cov_123	CSK2E_ARATH^CSK2E_ARATH^Q:1840-1424,H:23-148^71.127%ID^E:7.76e-38^RecName: Full=Putative casein kinase II subunit beta-4;^Eukaryota; Viridiplantae; Streptophyta; Embryophyta; Tracheophyta; Spermatophyta; Magnoliopsida; eudicotyledons; Gunneridae; Pentapetalae; rosids; malvids; Brassicales; Brassicaceae; Camelineae; Arabidopsis	1.49929	1.84374	-0.548272	0.376128	0.242983	-0.118412	-5.81468	-3.26625	-4.65764	1.10287	1.01008	0.590117	1.11759	1.13041	1.18869	1.9991	2.30426
1	Ntome_NODE_10206_length_2170_cov_13	COPIA_DROME^COPIA_DROME^Q:2086-1853,H:1265-1337^37.975%ID^E:1.57e-10^RecName: Full=Copia protein;^Eukaryota; Metazoa; Ecdysozoa; Arthropoda; Hexapoda; Insecta; Pterygota; Neoptera; Holometabola; Diptera; Brachycera; Muscomorpha; Ephydroidea; Drosophilidae; Drosophila; Sophophora`COPIA_DROME^COPIA_DROME^Q:1871-1662,H:1333-1400^32.877%ID^E:1.57e-10^RecName: Full=Copia protein;^Eukaryota; Metazoa; E…	1.13946	0.191926	1.24255	-1.2935	-1.03047	1.19193	-3.61543	-3.61543	-3.61543	1.99928	0.904994	2.72442	2.53716	-2.61543	-1.2935	2.35197	2.79549
1	Ntome_NODE_10207_length_2169_cov_287	AAP3_ARATH^AAP3_ARATH^Q:415-1833,H:3-474^75.476%ID^E:0^RecName: Full=Amino acid permease 3;^Eukaryota; Viridiplantae; Streptophyta; Embryophyta; Tracheophyta; Spermatophyta; Magnoliopsida; eudicotyledons; Gunneridae; Pentapetalae; rosids; malvids; Brassicales; Brassicaceae; Camelineae; Arabidopsis	1.97141	1.82645	0.278168	0.863051	0.766108	1.87783	-6.07171	-6.13114	-7.22875	1.29112	1.03212	1.34186	1.5785	0.298488	1.05554	2.75709	2.49388
1	Ntome_NODE_10208_length_2169_cov_283	ENPL_CATRO^ENPL_CATRO^Q:3-1733,H:201-777^87.522%ID^E:0^RecName: Full=Endoplasmin homolog;^Eukaryota; Viridiplantae; Streptophyta; Embryophyta; Tracheophyta; Spermatophyta; Magnoliopsida; eudicotyledons; Gunneridae; Pentapetalae; asterids; lamiids; Gentianales; Apocynaceae; Rauvolfioideae; Vinceae; Catharanthinae; Catharanthus	2.59226	2.09364	0.989934	1.40165	0.63307	1.31984	-6.66225	-5.99206	-8.53803	1.69565	-0.128641	1.7185	1.31314	0.577506	0.962471	2.3059	3.71744
1	Ntome_NODE_10209_length_2169_cov_260	CCX5_ARATH^CCX5_ARATH^Q:2024-507,H:36-545^66.089%ID^E:0^RecName: Full=Cation/calcium exchanger 5;^Eukaryota; Viridiplantae; Streptophyta; Embryophyta; Tracheophyta; Spermatophyta; Magnoliopsida; eudicotyledons; Gunneridae; Pentapetalae; rosids; malvids; Brassicales; Brassicaceae; Camelineae; Arabidopsis	0.470523	1.25864	-0.162601	1.17339	1.18249	0.603909	-4.77773	-6.60554	-6.60554	2.52273	1.12047	0.513293	1.04536	1.12244	2.06932	2.8102	2.25864
1	Ntome_NODE_1021_length_5062_cov_265	NAC50_ARATH^NAC50_ARATH^Q:1284-1826,H:26-207^69.78%ID^E:1.23e-84^RecName: Full=NAC domain containing protein 50 {ECO:0000303|PubMed:15029955};^Eukaryota; Viridiplantae; Streptophyta; Embryophyta; Tracheophyta; Spermatophyta; Magnoliopsida; eudicotyledons; Gunneridae; Pentapetalae; rosids; malvids; Brassicales; Brassicaceae; Camelineae; Arabidopsis`NAC50_ARATH^NAC50_ARATH^Q:4451-4711,H:359-439^42.…	1.38859	1.25605	-0.40002	-0.026438	-0.200264	-0.0542166	-5.19106	-3.18976	-4.19544	1.29749	1.15453	0.951209	1.01853	0.977039	0.830066	2.12124	2.26246
1	Ntome_NODE_10210_length_2169_cov_173	PP287_ARATH^PP287_ARATH^Q:2115-691,H:48-525^74.059%ID^E:0^RecName: Full=Pentatricopeptide repeat-containing protein At3g59040;^Eukaryota; Viridiplantae; Streptophyta; Embryophyta; Tracheophyta; Spermatophyta; Magnoliopsida; eudicotyledons; Gunneridae; Pentapetalae; rosids; malvids; Brassicales; Brassicaceae; Camelineae; Arabidopsis	2.16213	1.93811	0.161525	1.00259	0.600239	0.595381	-5.22045	-5.22045	-5.22045	1.08132	1.04802	0.497911	0.804135	0.863827	-0.221803	1.94124	3.18673
1	Ntome_NODE_10211_length_2169_cov_116	CSPL8_ARATH^CSPL8_ARATH^Q:1636-1334,H:119-219^60.396%ID^E:3.63e-36^RecName: Full=CASP-like protein 4A3;^Eukaryota; Viridiplantae; Streptophyta; Embryophyta; Tracheophyta; Spermatophyta; Magnoliopsida; eudicotyledons; Gunneridae; Pentapetalae; rosids; malvids; Brassicales; Brassicaceae; Camelineae; Arabidopsis	2.52606	2.1631	0.156885	0.84121	0.823354	-0.486427	-5.42988	-5.42988	-5.42988	1.11315	1.59781	0.499912	1.03004	0.807187	0.998732	2.06061	2.15801
1	Ntome_NODE_10212_length_2169_cov_101	FBL34_ARATH^FBL34_ARATH^Q:1605-355,H:1-418^54.157%ID^E:1.34e-137^RecName: Full=F-box/LRR-repeat protein At1g67190;^Eukaryota; Viridiplantae; Streptophyta; Embryophyta; Tracheophyta; Spermatophyta; Magnoliopsida; eudicotyledons; Gunneridae; Pentapetalae; rosids; malvids; Brassicales; Brassicaceae; Camelineae; Arabidopsis	0.893477	1.25605	-0.148343	-0.328916	-1.42845	-0.148343	-0.913878	-1.91388	-3.23581	0.223626	0.0121214	-0.235806	1.49211	1.12175	-0.328916	1.34916	2.33405
1	Ntome_NODE_10214_length_2168_cov_250	RIBA3_ARATH^RIBA3_ARATH^Q:313-1806,H:11-502^70.541%ID^E:0^RecName: Full=Monofunctional riboflavin biosynthesis protein RIBA 3, chloroplastic;^Eukaryota; Viridiplantae; Streptophyta; Embryophyta; Tracheophyta; Spermatophyta; Magnoliopsida; eudicotyledons; Gunneridae; Pentapetalae; rosids; malvids; Brassicales; Brassicaceae; Camelineae; Arabidopsis	0.423007	0.35991	-0.896834	0.264957	-0.502366	0.504889	-5.53491	-4.40398	-5.53491	1.59376	2.09729	1.15187	1.97621	1.06009	1.77361	2.43243	3.23496
1	Ntome_NODE_10215_length_2168_cov_250	GPMA_PARUW^GPMA_PARUW^Q:1415-753,H:4-224^61.086%ID^E:8.37e-96^RecName: Full=2,3-bisphosphoglycerate-dependent phosphoglycerate mutase {ECO:0000255|HAMAP-Rule:MF_01039};^Bacteria; Chlamydiae; Parachlamydiales; Parachlamydiaceae; Candidatus Protochlamydia	1.87236	1.37879	0.886509	0.734701	0.487546	0.731986	-6.38074	-5.98006	-5.8926	1.23652	0.963979	1.09884	1.57756	1.5708	1.00467	2.40148	2.30765
1	Ntome_NODE_10216_length_2169_cov_184	RRT1_ARATH^RRT1_ARATH^Q:156-1595,H:21-499^74.428%ID^E:0^RecName: Full=Rhamnogalacturonan I rhamnosyltransferase 1 {ECO:0000303|PubMed:30082766};^Eukaryota; Viridiplantae; Streptophyta; Embryophyta; Tracheophyta; Spermatophyta; Magnoliopsida; eudicotyledons; Gunneridae; Pentapetalae; rosids; malvids; Brassicales; Brassicaceae; Camelineae; Arabidopsis	1.90241	1.65376	0.767113	0.693554	0.447454	0.725641	-5.94452	-5.94452	-5.94452	1.02771	1.25966	0.876935	1.63374	1.24767	1.04371	2.0193	2.5349
1	Ntome_NODE_10217_length_2168_cov_134	DEXHC_ARATH^DEXHC_ARATH^Q:2-1936,H:1523-2167^77.829%ID^E:0^RecName: Full=DExH-box ATP-dependent RNA helicase DExH12 {ECO:0000305};^Eukaryota; Viridiplantae; Streptophyta; Embryophyta; Tracheophyta; Spermatophyta; Magnoliopsida; eudicotyledons; Gunneridae; Pentapetalae; rosids; malvids; Brassicales; Brassicaceae; Camelineae; Arabidopsis`DEXHC_ARATH^DEXHC_ARATH^Q:38-1888,H:696-1303^25.914%ID^E:6.64…	1.75748	1.76865	0.258198	0.247026	-1.46023	-0.838739	-3.5757	-5.16067	-5.16067	1.92499	1.56057	1.25008	1.52345	1.46738	1.067	0.973349	2.39783
1	Ntome_NODE_10218_length_2168_cov_102	Y5262_ARATH^Y5262_ARATH^Q:1967-501,H:6-497^57.724%ID^E:1.62e-179^RecName: Full=Ankyrin repeat-containing protein At5g02620;^Eukaryota; Viridiplantae; Streptophyta; Embryophyta; Tracheophyta; Spermatophyta; Magnoliopsida; eudicotyledons; Gunneridae; Pentapetalae; rosids; malvids; Brassicales; Brassicaceae; Camelineae; Arabidopsis	1.14036	1.36775	0.0128009	0.305046	-0.369117	0.216517	-4.20908	-3.19472	-3.18051	0.0703951	-1.03116	0.605987	1.7898	0.506817	0.891481	2.91794	2.15969
1	Ntome_NODE_10219_length_2167_cov_291	ODP22_ARATH^ODP22_ARATH^Q:153-1811,H:2-539^64.716%ID^E:0^RecName: Full=Dihydrolipoyllysine-residue acetyltransferase component 2 of pyruvate dehydrogenase complex, mitochondrial;^Eukaryota; Viridiplantae; Streptophyta; Embryophyta; Tracheophyta; Spermatophyta; Magnoliopsida; eudicotyledons; Gunneridae; Pentapetalae; rosids; malvids; Brassicales; Brassicaceae; Camelineae; Arabidopsis	1.27719	1.16862	-0.0572884	1.29388	0.642354	1.14881	-6.50671	-5.92873	-5.91017	1.21763	1.27082	0.906247	1.84375	1.3593	1.4282	2.25187	2.59424
1	Ntome_NODE_1022_length_5062_cov_184	GLYC6_ARATH^GLYC6_ARATH^Q:4488-3076,H:16-492^67.427%ID^E:0^RecName: Full=Serine hydroxymethyltransferase 6;^Eukaryota; Viridiplantae; Streptophyta; Embryophyta; Tracheophyta; Spermatophyta; Magnoliopsida; eudicotyledons; Gunneridae; Pentapetalae; rosids; malvids; Brassicales; Brassicaceae; Camelineae; Arabidopsis`GLYC6_ARATH^GLYC6_ARATH^Q:891-565,H:491-599^60.55%ID^E:1.05e-36^RecName: Full=Serine…	0.652194	0.175361	-0.666075	0.222728	0.139641	0.268008	-3.56669	-3.06154	-4.84821	1.09687	0.832525	0.78382	1.61818	0.941951	0.982423	2.17428	2.25454
1	Ntome_NODE_10220_length_2167_cov_269	Y4920_ARATH^Y4920_ARATH^Q:662-1624,H:83-402^46.106%ID^E:1.5e-103^RecName: Full=Uncharacterized protein At4g37920;^Eukaryota; Viridiplantae; Streptophyta; Embryophyta; Tracheophyta; Spermatophyta; Magnoliopsida; eudicotyledons; Gunneridae; Pentapetalae; rosids; malvids; Brassicales; Brassicaceae; Camelineae; Arabidopsis	1.75026	1.48571	0.529271	0.229498	-0.151276	0.281591	-5.35842	-3.46343	-4.3763	0.627181	-0.141115	0.489969	1.586	1.11579	0.8685	2.02098	2.50579
1	Ntome_NODE_10221_length_2167_cov_258	CDPK7_ARATH^CDPK7_ARATH^Q:1609-50,H:1-527^78.178%ID^E:0^RecName: Full=Calcium-dependent protein kinase 7;^Eukaryota; Viridiplantae; Streptophyta; Embryophyta; Tracheophyta; Spermatophyta; Magnoliopsida; eudicotyledons; Gunneridae; Pentapetalae; rosids; malvids; Brassicales; Brassicaceae; Camelineae; Arabidopsis	1.19165	2.80344	1.33025	0.182864	0.700474	0.185065	-5.31739	-6.43508	-6.43508	2.81766	0.311366	0.497429	1.58373	0.398062	2.0652	2.53996	1.58039
1	Ntome_NODE_10222_length_2166_cov_193	SBT3_SOLLC^SBT3_SOLLC^Q:2123-24,H:35-758^48.837%ID^E:0^RecName: Full=Subtilisin-like protease SBT3 {ECO:0000303|PubMed:27259555};^Eukaryota; Viridiplantae; Streptophyta; Embryophyta; Tracheophyta; Spermatophyta; Magnoliopsida; eudicotyledons; Gunneridae; Pentapetalae; asterids; lamiids; Solanales; Solanaceae; Solanoideae; Solaneae; Solanum; Lycopersicon	2.79828	2.13836	0.705833	0.676608	0.677592	1.44636	-4.1972	-4.1972	-4.1972	0.664751	-0.270257	-0.532722	1.05867	1.41574	0.32133	0.96307	0.527991
1	Ntome_NODE_10223_length_2167_cov_100	SDF2_ARATH^SDF2_ARATH^Q:1541-1750,H:147-216^78.571%ID^E:2.39e-34^RecName: Full=Stromal cell-derived factor 2-like protein;^Eukaryota; Viridiplantae; Streptophyta; Embryophyta; Tracheophyta; Spermatophyta; Magnoliopsida; eudicotyledons; Gunneridae; Pentapetalae; rosids; malvids; Brassicales; Brassicaceae; Camelineae; Arabidopsis`SDF2_ARATH^SDF2_ARATH^Q:1366-1434,H:125-147^73.913%ID^E:2.39e-34^RecN…	0.930803	0.254395	-1.31186	0.638682	-0.0484769	0.964696	-4.20494	-3.10541	-4.71952	1.15622	0.34411	0.994561	1.26662	1.19613	0.680562	1.87648	3.08694
1	Ntome_NODE_10224_length_2167_cov_94	PCS1L_ARATH^PCS1L_ARATH^Q:1812-610,H:46-451^67.892%ID^E:0^RecName: Full=Aspartic proteinase PCS1;^Eukaryota; Viridiplantae; Streptophyta; Embryophyta; Tracheophyta; Spermatophyta; Magnoliopsida; eudicotyledons; Gunneridae; Pentapetalae; rosids; malvids; Brassicales; Brassicaceae; Camelineae; Arabidopsis	1.72917	1.65707	0.551018	1.33318	1.30596	0.69526	-5.9883	-4.9811	-5.9883	1.68363	1.2195	1.2039	1.1753	0.689353	-0.26092	1.82914	2.14613
1	Ntome_NODE_10225_length_2167_cov_40	.	1.63492	1.1081	1.08093	-0.67544	-3.20151	-0.700707	-0.700707	-2.15886	-3.20151	0.868021	-0.0188166	0.238114	0.998556	1.62631	0.680156	0.270979	2.15146
1	Ntome_NODE_10226_length_2166_cov_31	.	0.834299	0.642105	1.22707	1.00468	0.642105	0.964445	-4.16525	-1.16525	-2.16525	0.596035	0.154512	0.102286	-0.821842	0.180998	0.396687	0.60505	0.967327
1	Ntome_NODE_10227_length_2166_cov_220	PIP24_MAIZE^PIP24_MAIZE^Q:288-899,H:1-206^83.495%ID^E:2.1e-106^RecName: Full=Aquaporin PIP2-4;^Eukaryota; Viridiplantae; Streptophyta; Embryophyta; Tracheophyta; Spermatophyta; Magnoliopsida; Liliopsida; Poales; Poaceae; PACMAD clade; Panicoideae; Andropogonodae; Andropogoneae; Tripsacinae; Zea`PIP24_MAIZE^PIP24_MAIZE^Q:1625-1876,H:206-288^83.333%ID^E:2.53e-37^RecName: Full=Aquaporin PIP2-4;^Euka…	1.69124	1.84837	1.70515	0.799834	0.401955	0.427789	-6.89057	-6.29891	-6.70212	2.28476	2.11385	2.0643	0.998768	2.02699	1.15487	1.11691	1.25681
1	Ntome_NODE_10228_length_2166_cov_99	ROG1_YEAST^ROG1_YEAST^Q:1459-668,H:189-417^30.627%ID^E:3.41e-11^RecName: Full=Putative lipase ROG1;^Eukaryota; Fungi; Dikarya; Ascomycota; Saccharomycotina; Saccharomycetes; Saccharomycetales; Saccharomycetaceae; Saccharomyces	1.30817	1.29553	0.594538	-0.214493	-0.798327	0.751226	-5.21179	-5.21179	-5.21179	1.18533	0.443566	0.753075	2.09017	1.80011	1.12432	2.58911	2.71303
1	Ntome_NODE_10229_length_2166_cov_64	ATG10_ARATH^ATG10_ARATH^Q:340-807,H:9-163^44.231%ID^E:4.8e-34^RecName: Full=Ubiquitin-like-conjugating enzyme ATG10;^Eukaryota; Viridiplantae; Streptophyta; Embryophyta; Tracheophyta; Spermatophyta; Magnoliopsida; eudicotyledons; Gunneridae; Pentapetalae; rosids; malvids; Brassicales; Brassicaceae; Camelineae; Arabidopsis`ATG10_ARATH^ATG10_ARATH^Q:1756-1944,H:164-224^55.556%ID^E:1.83e-14^RecName:…	0.789973	1.12929	1.00244	0.35168	-0.133746	0.244765	-2.45567	-3.45567	-3.45567	-0.133746	-0.28575	0.865532	1.18818	0.00375709	0.244765	1.97059	2.12929
1	Ntome_NODE_1023_length_5060_cov_150	GAT12_ARATH^GAT12_ARATH^Q:1122-307,H:67-331^52.727%ID^E:3.63e-68^RecName: Full=GATA transcription factor 12 {ECO:0000303|PubMed:15084732};^Eukaryota; Viridiplantae; Streptophyta; Embryophyta; Tracheophyta; Spermatophyta; Magnoliopsida; eudicotyledons; Gunneridae; Pentapetalae; rosids; malvids; Brassicales; Brassicaceae; Camelineae; Arabidopsis	0.329866	-0.098005	-0.355017	0.190734	0.0104206	0.357023	-3.4498	-2.55463	-3.00391	0.825309	0.796763	0.771484	1.34102	0.460132	0.468223	2.10531	1.80507
1	Ntome_NODE_10230_length_2166_cov_32	.	1.87378	1.74829	0.510813	1.02539	0.288421	-0.296542	-3.29654	-3.29654	-3.29654	1.51081	0.288421	0.575302	-0.296542	0.510813	-0.711579	0.873383	1.98886
1	Ntome_NODE_10231_length_2166_cov_23	POLR2_ARATH^POLR2_ARATH^Q:424-2,H:312-452^33.784%ID^E:1.13e-06^RecName: Full=Retrovirus-related Pol polyprotein from transposon RE2;^Eukaryota; Viridiplantae; Streptophyta; Embryophyta; Tracheophyta; Spermatophyta; Magnoliopsida; eudicotyledons; Gunneridae; Pentapetalae; rosids; malvids; Brassicales; Brassicaceae; Camelineae; Arabidopsis	0.406803	0.748247	-0.297325	-1.86073	-1.63304	-0.422648	-2.19368	-0.502106	-0.272392	0.479997	0.344426	0.665622	0.815864	0.757081	0.680209	0.587293	1.69637
1	Ntome_NODE_10232_length_2165_cov_309	LHWL1_ARATH^LHWL1_ARATH^Q:1308-1889,H:543-734^51.5%ID^E:3.66e-52^RecName: Full=Transcription factor EMB1444 {ECO:0000303|PubMed:12586866};^Eukaryota; Viridiplantae; Streptophyta; Embryophyta; Tracheophyta; Spermatophyta; Magnoliopsida; eudicotyledons; Gunneridae; Pentapetalae; rosids; malvids; Brassicales; Brassicaceae; Camelineae; Arabidopsis	1.19917	0.922595	-0.7483	-0.254715	-1.07559	0.27502	-3.43146	-3.46769	-3.19929	1.44798	0.739258	0.974963	1.39922	0.801473	0.580741	1.48778	2.34886
1	Ntome_NODE_10233_length_2165_cov_221	SBIR1_ARATH^SBIR1_ARATH^Q:1998-175,H:35-641^61.626%ID^E:0^RecName: Full=Leucine-rich repeat receptor-like serine/threonine/tyrosine-protein kinase SOBIR1;^Eukaryota; Viridiplantae; Streptophyta; Embryophyta; Tracheophyta; Spermatophyta; Magnoliopsida; eudicotyledons; Gunneridae; Pentapetalae; rosids; malvids; Brassicales; Brassicaceae; Camelineae; Arabidopsis	0.604795	2.86195	0.475949	-0.0397426	0.427321	0.920547	-4.4861	-4.84564	-5.9297	3.09712	-0.129321	-0.471255	0.58647	0.909375	1.54733	2.28947	2.18143
1	Ntome_NODE_10234_length_2165_cov_203	KCAB_ARATH^KCAB_ARATH^Q:1974-991,H:1-328^87.5%ID^E:0^RecName: Full=Probable voltage-gated potassium channel subunit beta;^Eukaryota; Viridiplantae; Streptophyta; Embryophyta; Tracheophyta; Spermatophyta; Magnoliopsida; eudicotyledons; Gunneridae; Pentapetalae; rosids; malvids; Brassicales; Brassicaceae; Camelineae; Arabidopsis	1.37463	1.22353	-0.0285051	0.440543	0.254011	0.509187	-5.8343	-5.10077	-5.19499	1.23668	1.51052	1.00069	1.4993	1.26087	0.930864	2.33678	2.58098
1	Ntome_NODE_10235_length_2165_cov_188	EZA1_ARATH^EZA1_ARATH^Q:1481-3,H:137-652^44.963%ID^E:2.92e-119^RecName: Full=Histone-lysine N-methyltransferase EZA1;^Eukaryota; Viridiplantae; Streptophyta; Embryophyta; Tracheophyta; Spermatophyta; Magnoliopsida; eudicotyledons; Gunneridae; Pentapetalae; rosids; malvids; Brassicales; Brassicaceae; Camelineae; Arabidopsis	0.797454	1.49689	0.253582	-0.427816	-0.230604	0.090238	-4.92866	-3.46513	-2.31671	0.83932	0.513897	0.393693	1.60686	1.03695	0.933883	1.3963	2.00987
1	Ntome_NODE_10236_length_2165_cov_162	.	1.4413	0.383349	0.096468	-0.593192	-1.15507	-0.299461	-4.54739	-2.22546	-2.37746	1.25997	0.944465	0.756393	1.7194	0.561136	0.642436	1.24703	2.1461
1	Ntome_NODE_10238_length_2165_cov_118	UNG_ARATH^UNG_ARATH^Q:897-268,H:118-330^75.587%ID^E:5.7e-112^RecName: Full=Uracil-DNA glycosylase, mitochondrial {ECO:0000303|PubMed:20056608};^Eukaryota; Viridiplantae; Streptophyta; Embryophyta; Tracheophyta; Spermatophyta; Magnoliopsida; eudicotyledons; Gunneridae; Pentapetalae; rosids; malvids; Brassicales; Brassicaceae; Camelineae; Arabidopsis	1.39362	1.63165	0.549932	0.501888	-0.454758	0.111001	-4.53286	-4.53286	-4.53286	0.940282	0.914062	0.466242	1.47658	1.13049	0.403547	2.02097	2.51307
1	Ntome_NODE_10239_length_2165_cov_102	SAP5_ARATH^SAP5_ARATH^Q:1245-1640,H:1-150^49.02%ID^E:3.33e-27^RecName: Full=Zinc finger A20 and AN1 domain-containing stress-associated protein 5;^Eukaryota; Viridiplantae; Streptophyta; Embryophyta; Tracheophyta; Spermatophyta; Magnoliopsida; eudicotyledons; Gunneridae; Pentapetalae; rosids; malvids; Brassicales; Brassicaceae; Camelineae; Arabidopsis	1.88985	2.07356	0.347296	0.853559	0.56997	0.402743	-5.89941	-5.90657	-6.91376	1.54825	1.43346	0.900401	1.6912	1.52444	1.74762	1.70572	2.03168
1	Ntome_NODE_10241_length_2164_cov_278	ODO2A_ARATH^ODO2A_ARATH^Q:1834-440,H:12-464^71.613%ID^E:0^RecName: Full=Dihydrolipoyllysine-residue succinyltransferase component of 2-oxoglutarate dehydrogenase complex 1, mitochondrial;^Eukaryota; Viridiplantae; Streptophyta; Embryophyta; Tracheophyta; Spermatophyta; Magnoliopsida; eudicotyledons; Gunneridae; Pentapetalae; rosids; malvids; Brassicales; Brassicaceae; Camelineae; Arabidopsis	1.98622	1.93337	0.761236	1.02641	0.395534	1.26242	-7.92869	-7.92869	-6.65966	1.59244	1.42789	1.31572	1.93732	1.72596	1.15649	2.56015	3.43589
1	Ntome_NODE_10242_length_2164_cov_211	PME62_ARATH^PME62_ARATH^Q:1996-1025,H:37-377^57.771%ID^E:2.79e-126^RecName: Full=Pectinesterase QRT1;^Eukaryota; Viridiplantae; Streptophyta; Embryophyta; Tracheophyta; Spermatophyta; Magnoliopsida; eudicotyledons; Gunneridae; Pentapetalae; rosids; malvids; Brassicales; Brassicaceae; Camelineae; Arabidopsis	0.738718	0.778662	-0.0874844	-0.706067	-0.905542	0.158237	-3.60857	-2.54634	-2.81064	0.913152	0.490202	0.468975	1.47023	0.927273	0.549454	1.8601	2.30963
1	Ntome_NODE_10243_length_2164_cov_192	EXOL3_ARATH^EXOL3_ARATH^Q:1854-913,H:25-337^78.025%ID^E:6.78e-171^RecName: Full=Protein EXORDIUM-like 3;^Eukaryota; Viridiplantae; Streptophyta; Embryophyta; Tracheophyta; Spermatophyta; Magnoliopsida; eudicotyledons; Gunneridae; Pentapetalae; rosids; malvids; Brassicales; Brassicaceae; Camelineae; Arabidopsis	2.31684	2.15218	0.0837806	2.09849	1.64071	1.11733	-7.86552	-5.61759	-7.86552	1.77201	1.93118	0.569316	0.944665	1.57587	0.210333	1.73067	3.20527
1	Ntome_NODE_10244_length_2164_cov_150	.	1.88828	1.64641	1.74344	1.15848	0.845319	1.48742	-5.19908	-5.19908	-5.19908	0.528845	1.15848	1.10471	-0.154681	0.167596	-1.29218	2.78961	2.52551
1	Ntome_NODE_10245_length_2164_cov_140	.	2.80639	2.27243	1.49843	1.6487	1.20892	1.4656	-3.961	-3.961	-3.961	-0.660877	-0.482029	-0.961001	-1.63619	-0.720686	-1.15365	2.77222	3.82475
1	Ntome_NODE_10246_length_2164_cov_111	.	0.511619	0.1772	-0.539007	-0.176437	-0.348166	-0.539007	-4.34636	-3.34636	-4.34636	2.16143	1.40853	0.460993	2.34014	1.48653	1.56053	2.3262	1.20853
1	Ntome_NODE_10247_length_2163_cov_287	MOS11_ARATH^MOS11_ARATH^Q:340-639,H:80-185^62.264%ID^E:1.43e-31^RecName: Full=Protein MODIFIER OF SNC1 11;^Eukaryota; Viridiplantae; Streptophyta; Embryophyta; Tracheophyta; Spermatophyta; Magnoliopsida; eudicotyledons; Gunneridae; Pentapetalae; rosids; malvids; Brassicales; Brassicaceae; Camelineae; Arabidopsis	1.91657	1.7942	0.472202	0.915171	0.910643	0.223913	-6.08415	-5.96919	-7.20185	1.33436	1.46445	0.781316	1.98975	1.78109	1.37028	2.22232	2.07892
1	Ntome_NODE_10249_length_2163_cov_187	GT18_ARATH^GT18_ARATH^Q:576-1787,H:115-516^54.321%ID^E:8.09e-164^RecName: Full=Xyloglucan galactosyltransferase XLT2 {ECO:0000305};^Eukaryota; Viridiplantae; Streptophyta; Embryophyta; Tracheophyta; Spermatophyta; Magnoliopsida; eudicotyledons; Gunneridae; Pentapetalae; rosids; malvids; Brassicales; Brassicaceae; Camelineae; Arabidopsis	2.48478	1.90864	0.891083	0.995557	0.491996	0.790943	-7.12195	-6.19917	-7.13138	1.64902	1.27817	1.28531	1.72286	2.02678	0.642547	1.84384	2.44097
1	Ntome_NODE_1025_length_5057_cov_259	NOV_ARATH^NOV_ARATH^Q:3560-2457,H:1162-1511^31.633%ID^E:1.02e-31^RecName: Full=Protein NO VEIN {ECO:0000303|PubMed:19880797};^Eukaryota; Viridiplantae; Streptophyta; Embryophyta; Tracheophyta; Spermatophyta; Magnoliopsida; eudicotyledons; Gunneridae; Pentapetalae; rosids; malvids; Brassicales; Brassicaceae; Camelineae; Arabidopsis	0.635263	0.133383	-0.572933	-0.595636	-0.0155804	-0.161058	-3.91663	-3.35164	-4.22883	1.09275	1.2397	0.870326	1.69431	1.31965	0.993599	2.26512	2.59821
1	Ntome_NODE_10250_length_2163_cov_76	CSLA2_ARATH^CSLA2_ARATH^Q:92-1690,H:1-534^76.404%ID^E:0^RecName: Full=Glucomannan 4-beta-mannosyltransferase 2 {ECO:0000305};^Eukaryota; Viridiplantae; Streptophyta; Embryophyta; Tracheophyta; Spermatophyta; Magnoliopsida; eudicotyledons; Gunneridae; Pentapetalae; rosids; malvids; Brassicales; Brassicaceae; Camelineae; Arabidopsis	2.7984	2.26093	1.19092	1.21042	0.863013	1.75712	-3.8515	-3.13044	-5.48377	-0.732088	0.199369	-0.326723	1.00536	0.341002	-0.85908	1.07021	1.68686
1	Ntome_NODE_10251_length_2163_cov_23	.	1.61856	1.80498	1.22001	-0.654456	0.345544	-0.654456	-3.23942	-2.23942	-3.23942	-1.65446	-0.239418	0.667472	0.0825099	0.665548	0.930507	1.84804	2.73786
1	Ntome_NODE_10252_length_2162_cov_193	.	1.4112	1.21402	0.75834	0.535948	0.487038	1.30148	-4.37094	-4.37094	-4.37094	0.088489	-0.670503	-0.0490146	0.856721	0.088489	-0.28348	3.10479	4.2693
1	Ntome_NODE_10253_length_2162_cov_158	E70H1_ARATH^E70H1_ARATH^Q:1742-99,H:37-578^47.818%ID^E:4.01e-161^RecName: Full=Exocyst complex component EXO70H1 {ECO:0000303|PubMed:16942608};^Eukaryota; Viridiplantae; Streptophyta; Embryophyta; Tracheophyta; Spermatophyta; Magnoliopsida; eudicotyledons; Gunneridae; Pentapetalae; rosids; malvids; Brassicales; Brassicaceae; Camelineae; Arabidopsis	0.400305	2.02875	-0.046833	0.493435	-0.137031	0.523483	-5.09123	-4.09123	-5.09123	2.73577	1.1374	-0.223825	1.78406	2.58544	2.80559	-0.33634	0.523483
1	Ntome_NODE_10254_length_2162_cov_153	RTNLH_ARATH^RTNLH_ARATH^Q:1101-1838,H:1-245^61.943%ID^E:1.33e-106^RecName: Full=Reticulon-like protein B8;^Eukaryota; Viridiplantae; Streptophyta; Embryophyta; Tracheophyta; Spermatophyta; Magnoliopsida; eudicotyledons; Gunneridae; Pentapetalae; rosids; malvids; Brassicales; Brassicaceae; Camelineae; Arabidopsis	2.9751	2.92753	0.589575	1.61557	1.25185	0.782051	-8.60818	-6.83419	-6.88572	1.08694	1.15836	0.980288	1.65014	1.15964	1.45871	2.20923	2.48311
1	Ntome_NODE_10255_length_2162_cov_148	ABD18_MOUSE^ABD18_MOUSE^Q:1723-995,H:8-252^33.466%ID^E:1.38e-25^RecName: Full=Protein ABHD18 {ECO:0000305};^Eukaryota; Metazoa; Chordata; Craniata; Vertebrata; Euteleostomi; Mammalia; Eutheria; Euarchontoglires; Glires; Rodentia; Myomorpha; Muroidea; Muridae; Murinae; Mus; Mus`ABD18_MOUSE^ABD18_MOUSE^Q:958-722,H:379-458^41.25%ID^E:4.97e-14^RecName: Full=Protein ABHD18 {ECO:0000305};^Eukaryota; Me…	1.00092	1.25315	0.466678	0.314062	0.199555	0.985411	-4.16482	-2.555	-3.55949	0.944202	1.00035	0.387878	0.372943	0.144405	0.562973	0.780307	1.86646
1	Ntome_NODE_10256_length_2162_cov_122	PRFB3_ARATH^PRFB3_ARATH^Q:316-1497,H:23-401^49.747%ID^E:1.48e-107^RecName: Full=Peptide chain release factor PrfB3, chloroplastic {ECO:0000303|PubMed:21771930};^Eukaryota; Viridiplantae; Streptophyta; Embryophyta; Tracheophyta; Spermatophyta; Magnoliopsida; eudicotyledons; Gunneridae; Pentapetalae; rosids; malvids; Brassicales; Brassicaceae; Camelineae; Arabidopsis	1.15845	1.50078	0.398165	-0.340498	-0.512547	0.134214	-2.81358	-2.80418	-4.42711	0.380243	-0.620788	0.514933	1.2725	1.52359	-0.281435	1.82082	3.09645
1	Ntome_NODE_10259_length_2161_cov_275	AAE6_ARATH^AAE6_ARATH^Q:1895-288,H:1-541^65.441%ID^E:0^RecName: Full=Probable acyl-activating enzyme 6;^Eukaryota; Viridiplantae; Streptophyta; Embryophyta; Tracheophyta; Spermatophyta; Magnoliopsida; eudicotyledons; Gunneridae; Pentapetalae; rosids; malvids; Brassicales; Brassicaceae; Camelineae; Arabidopsis	2.05882	2.29385	1.09519	0.6448	0.512538	0.803008	-5.63575	-6.64648	-6.6322	1.26101	0.862143	0.921448	2.0641	2.32766	2.08585	1.19495	0.789061
1	Ntome_NODE_1026_length_5058_cov_92	POLX_TOBAC^POLX_TOBAC^Q:1894-2607,H:9-249^82.988%ID^E:2e-116^RecName: Full=Retrovirus-related Pol polyprotein from transposon TNT 1-94;^Eukaryota; Viridiplantae; Streptophyta; Embryophyta; Tracheophyta; Spermatophyta; Magnoliopsida; eudicotyledons; Gunneridae; Pentapetalae; asterids; lamiids; Solanales; Solanaceae; Nicotianoideae; Nicotianeae; Nicotiana	1.27612	0.791287	-0.0438434	-0.398347	-1.00867	0.670018	-2.94144	-0.965002	-1.65377	0.14736	0.326954	-0.880829	1.10349	0.795652	-0.595458	1.27353	2.10295
1	Ntome_NODE_10260_length_2160_cov_268	COL14_ARATH^COL14_ARATH^Q:1832-465,H:12-401^43.162%ID^E:1.49e-93^RecName: Full=Zinc finger protein CONSTANS-LIKE 14;^Eukaryota; Viridiplantae; Streptophyta; Embryophyta; Tracheophyta; Spermatophyta; Magnoliopsida; eudicotyledons; Gunneridae; Pentapetalae; rosids; malvids; Brassicales; Brassicaceae; Camelineae; Arabidopsis	1.68789	1.58563	0.196954	0.172512	0.467882	0.46277	-4.63558	-4.39859	-4.50028	1.12473	1.07791	0.580922	1.3582	0.930916	0.850959	1.27016	1.76701
1	Ntome_NODE_10261_length_2161_cov_232	RIO2_DICDI^RIO2_DICDI^Q:1859-849,H:1-320^56.677%ID^E:1.66e-124^RecName: Full=Serine/threonine-protein kinase rio2;^Eukaryota; Amoebozoa; Mycetozoa; Dictyostelids; Dictyosteliales; Dictyosteliaceae; Dictyostelium	1.08664	0.890964	0.11819	-0.581684	-0.168158	0.22116	-1.77238	-1.90479	-2.91601	0.340882	0.226571	-0.517714	1.20618	0.244758	-0.154418	1.4081	2.27172
1	Ntome_NODE_10262_length_2161_cov_210	RBCX2_ARATH^RBCX2_ARATH^Q:1778-1128,H:1-202^50.691%ID^E:9.55e-65^RecName: Full=Chaperonin-like RbcX protein 2, chloroplastic {ECO:0000303|PubMed:21922322};^Eukaryota; Viridiplantae; Streptophyta; Embryophyta; Tracheophyta; Spermatophyta; Magnoliopsida; eudicotyledons; Gunneridae; Pentapetalae; rosids; malvids; Brassicales; Brassicaceae; Camelineae; Arabidopsis	1.00755	0.920807	0.372088	0.598743	-0.291853	1.02526	-6.13935	-6.13935	-5.0485	1.17951	1.12556	1.19282	2.33009	0.934043	0.653637	2.80615	3.47278
1	Ntome_NODE_10263_length_2161_cov_142	MUTS2_SYNY3^MUTS2_SYNY3^Q:1865-3,H:8-601^33.798%ID^E:5.52e-100^RecName: Full=Endonuclease MutS2 {ECO:0000255|HAMAP-Rule:MF_00092};^Bacteria; Cyanobacteria; Synechococcales; Merismopediaceae; Synechocystis	1.10014	1.2653	-0.74209	-1.05369	-0.821245	-0.388633	-1.77384	-1.26388	-1.90832	0.391098	-0.210027	0.107552	0.832367	0.538854	0.22707	1.65093	2.04841
1	Ntome_NODE_10267_length_2160_cov_237	EPN3_HUMAN^EPN3_HUMAN^Q:229-522,H:20-116^31.633%ID^E:2.53e-06^RecName: Full=Epsin-3;^Eukaryota; Metazoa; Chordata; Craniata; Vertebrata; Euteleostomi; Mammalia; Eutheria; Euarchontoglires; Primates; Haplorrhini; Catarrhini; Hominidae; Homo	0.913404	0.73418	0.957742	0.907889	0.81791	1.16728	-5.00753	-4.38923	-5.91677	1.0146	1.36131	0.690672	1.1969	0.603119	-0.106023	2.51752	2.53704
1	Ntome_NODE_10269_length_2160_cov_189	MAN2_ARATH^MAN2_ARATH^Q:1481-243,H:5-417^73.123%ID^E:0^RecName: Full=Mannan endo-1,4-beta-mannosidase 2;^Eukaryota; Viridiplantae; Streptophyta; Embryophyta; Tracheophyta; Spermatophyta; Magnoliopsida; eudicotyledons; Gunneridae; Pentapetalae; rosids; malvids; Brassicales; Brassicaceae; Camelineae; Arabidopsis	1.44464	1.41268	0.0175349	0.668394	0.246847	0.530144	-5.07869	-5.10262	-5.90456	1.41695	1.33084	0.917035	1.5907	1.5005	0.688139	1.73298	2.5885
1	Ntome_NODE_1027_length_5056_cov_289	HNRPQ_RAT^HNRPQ_RAT^Q:4207-3446,H:74-317^34.375%ID^E:2.36e-33^RecName: Full=Heterogeneous nuclear ribonucleoprotein Q;^Eukaryota; Metazoa; Chordata; Craniata; Vertebrata; Euteleostomi; Mammalia; Eutheria; Euarchontoglires; Glires; Rodentia; Myomorpha; Muroidea; Muridae; Murinae; Rattus	2.11958	1.89038	0.91774	-0.300975	-0.126747	0.00151096	-5.62533	-4.22044	-4.93442	1.13599	0.87173	0.826286	1.44528	1.01547	0.973081	2.00096	2.0099
1	Ntome_NODE_10270_length_2160_cov_167	EBP2_ARATH^EBP2_ARATH^Q:1032-238,H:41-293^62.547%ID^E:7.97e-74^RecName: Full=Probable rRNA-processing protein EBP2 homolog;^Eukaryota; Viridiplantae; Streptophyta; Embryophyta; Tracheophyta; Spermatophyta; Magnoliopsida; eudicotyledons; Gunneridae; Pentapetalae; rosids; malvids; Brassicales; Brassicaceae; Camelineae; Arabidopsis	1.38124	1.30202	0.402371	1.28192	0.756296	1.12992	-4.55894	-4.24712	-7.27922	0.849446	1.28577	0.705029	1.31137	0.981842	0.0108926	2.22019	2.46698
1	Ntome_NODE_10271_length_2160_cov_53	RMA1_CAPAN^RMA1_CAPAN^Q:1283-594,H:4-237^60.996%ID^E:1.58e-89^RecName: Full=E3 ubiquitin-protein ligase RMA1H1;^Eukaryota; Viridiplantae; Streptophyta; Embryophyta; Tracheophyta; Spermatophyta; Magnoliopsida; eudicotyledons; Gunneridae; Pentapetalae; asterids; lamiids; Solanales; Solanaceae; Solanoideae; Capsiceae; Capsicum	1.3321	2.33164	0.547831	-0.162663	0.770223	-0.300166	-3.62209	-2.03713	-2.62209	1.39583	-0.0371319	-1.62209	0.623553	0.289597	1.13279	0.901468	1.07835
1	Ntome_NODE_10272_length_2159_cov_267	ARI8_ARATH^ARI8_ARATH^Q:1901-525,H:48-515^60.638%ID^E:0^RecName: Full=Probable E3 ubiquitin-protein ligase ARI8;^Eukaryota; Viridiplantae; Streptophyta; Embryophyta; Tracheophyta; Spermatophyta; Magnoliopsida; eudicotyledons; Gunneridae; Pentapetalae; rosids; malvids; Brassicales; Brassicaceae; Camelineae; Arabidopsis	1.55193	1.42282	1.0519	-0.723192	-0.782518	-0.540163	-2.06517	-1.5975	-3.31137	0.329744	-0.00409466	-0.091905	0.778887	0.944984	0.803818	0.896311	1.33551
1	Ntome_NODE_10274_length_2159_cov_190	SELO_AROAE^SELO_AROAE^Q:1864-239,H:1-523^48.115%ID^E:6.85e-167^RecName: Full=Protein adenylyltransferase SelO {ECO:0000255|HAMAP-Rule:MF_00692};^Bacteria; Proteobacteria; Betaproteobacteria; Rhodocyclales; Rhodocyclaceae; Aromatoleum	1.48466	1.01549	-0.975526	-0.417219	-0.788706	-0.763208	-3.01463	-1.95636	-3.56256	1.16509	1.18372	1.20902	1.6012	0.466134	0.482652	1.14772	1.72253
1	Ntome_NODE_10275_length_2159_cov_87	RTOR1_ARATH^RTOR1_ARATH^Q:408-743,H:1-103^47.826%ID^E:1.99e-13^RecName: Full=Regulatory-associated protein of TOR 1;^Eukaryota; Viridiplantae; Streptophyta; Embryophyta; Tracheophyta; Spermatophyta; Magnoliopsida; eudicotyledons; Gunneridae; Pentapetalae; rosids; malvids; Brassicales; Brassicaceae; Camelineae; Arabidopsis	1.61843	1.40621	0.367435	0.178135	0.549818	-1.39847	-4.6048	-2.56917	-3.5976	1.05484	0.85987	0.105044	0.779597	0.456114	1.48711	1.89855	1.40889
1	Ntome_NODE_10277_length_2158_cov_289	TCPD_ARATH^TCPD_ARATH^Q:1922-357,H:16-536^90.421%ID^E:0^RecName: Full=T-complex protein 1 subunit delta {ECO:0000303|PubMed:11599560};^Eukaryota; Viridiplantae; Streptophyta; Embryophyta; Tracheophyta; Spermatophyta; Magnoliopsida; eudicotyledons; Gunneridae; Pentapetalae; rosids; malvids; Brassicales; Brassicaceae; Camelineae; Arabidopsis	1.07302	0.945978	-0.13553	1.01256	0.29866	0.737871	-5.8546	-4.67028	-6.34695	1.31757	1.30352	1.15279	1.74734	1.3541	0.927894	2.39235	2.74371
1	Ntome_NODE_10278_length_2158_cov_280	XYLL3_ARATH^XYLL3_ARATH^Q:453-1844,H:95-558^84.267%ID^E:0^RecName: Full=D-xylose-proton symporter-like 3, chloroplastic;^Eukaryota; Viridiplantae; Streptophyta; Embryophyta; Tracheophyta; Spermatophyta; Magnoliopsida; eudicotyledons; Gunneridae; Pentapetalae; rosids; malvids; Brassicales; Brassicaceae; Camelineae; Arabidopsis	1.61226	1.39057	0.113494	-0.408831	-0.866834	-0.513028	-2.81821	-2.63365	-4.10567	0.812129	1.15487	0.74864	0.876797	0.226424	0.0372484	2.04801	2.32579
1	Ntome_NODE_10279_length_2158_cov_276	LKHA4_ARATH^LKHA4_ARATH^Q:2110-287,H:4-615^73.127%ID^E:0^RecName: Full=Leucine aminopeptidase;^Eukaryota; Viridiplantae; Streptophyta; Embryophyta; Tracheophyta; Spermatophyta; Magnoliopsida; eudicotyledons; Gunneridae; Pentapetalae; rosids; malvids; Brassicales; Brassicaceae; Camelineae; Arabidopsis	3.03433	2.75118	1.32854	2.0672	1.54784	0.71869	-7.84987	-7.84987	-7.84987	1.35218	1.44635	1.04915	1.30162	1.06296	0.904513	2.75867	2.22639
1	Ntome_NODE_1028_length_5054_cov_302	AB1D_ARATH^AB1D_ARATH^Q:641-4627,H:1-1333^76.796%ID^E:0^RecName: Full=ABC transporter D family member 1 {ECO:0000303|PubMed:18299247};^Eukaryota; Viridiplantae; Streptophyta; Embryophyta; Tracheophyta; Spermatophyta; Magnoliopsida; eudicotyledons; Gunneridae; Pentapetalae; rosids; malvids; Brassicales; Brassicaceae; Camelineae; Arabidopsis	1.62034	1.43315	-0.179582	-0.373839	-0.209699	-0.34183	-4.16964	-4.643	-4.13734	1.17054	1.05376	0.925189	1.42431	1.59664	1.19871	1.67565	1.95663
1	Ntome_NODE_10280_length_2158_cov_256	CAD1_ARATH^CAD1_ARATH^Q:85-1845,H:7-557^57.143%ID^E:0^RecName: Full=MACPF domain-containing protein CAD1;^Eukaryota; Viridiplantae; Streptophyta; Embryophyta; Tracheophyta; Spermatophyta; Magnoliopsida; eudicotyledons; Gunneridae; Pentapetalae; rosids; malvids; Brassicales; Brassicaceae; Camelineae; Arabidopsis	1.64591	1.6167	0.609312	0.614984	0.248267	0.79199	-4.69524	-5.11482	-5.75074	0.908173	0.469379	0.386403	1.41747	1.13699	0.967744	2.26708	2.48041
1	Ntome_NODE_10281_length_2158_cov_256	TAT2_ARATH^TAT2_ARATH^Q:1836-589,H:7-410^70.913%ID^E:0^RecName: Full=Probable aminotransferase TAT2;^Eukaryota; Viridiplantae; Streptophyta; Embryophyta; Tracheophyta; Spermatophyta; Magnoliopsida; eudicotyledons; Gunneridae; Pentapetalae; rosids; malvids; Brassicales; Brassicaceae; Camelineae; Arabidopsis	2.27448	1.92064	-0.135369	0.0336583	-1.26948	-0.439157	-2.08755	-2.09715	-2.00211	-0.309648	-0.278918	-0.446705	1.42566	0.0537487	-0.140984	1.53187	1.96702
1	Ntome_NODE_10282_length_2158_cov_197	.	0.247933	2.78178	0.804571	-0.219037	1.39424	-0.207288	-6.91878	-6.91878	-5.88316	3.69809	0.842569	0.764493	0.668957	0.774077	2.55198	3.13414	2.48423
1	Ntome_NODE_10283_length_2158_cov_191	.	2.08196	1.74484	0.777362	0.850938	0.877465	0.846384	-3.03639	-3.98499	-2.60647	-1.98499	-1.98499	-2.40002	2.42135	1.68857	1.01501	1.18854	2.50542
1	Ntome_NODE_10284_length_2158_cov_124	PIN4_BOVIN^PIN4_BOVIN^Q:730-434,H:38-131^50.476%ID^E:1.41e-21^RecName: Full=Peptidyl-prolyl cis-trans isomerase NIMA-interacting 4;^Eukaryota; Metazoa; Chordata; Craniata; Vertebrata; Euteleostomi; Mammalia; Eutheria; Laurasiatheria; Cetartiodactyla; Ruminantia; Pecora; Bovidae; Bovinae; Bos	2.3473	2.42993	0.919841	0.983553	0.899999	0.493795	-6.27137	-6.54255	-7.26035	1.26096	1.62847	0.747357	1.7332	1.51642	1.08163	1.97192	2.0599
1	Ntome_NODE_10286_length_2158_cov_71	AUG1_ARATH^AUG1_ARATH^Q:544-293,H:215-298^77.381%ID^E:1.94e-30^RecName: Full=AUGMIN subunit 1 {ECO:0000303|PubMed:22505726};^Eukaryota; Viridiplantae; Streptophyta; Embryophyta; Tracheophyta; Spermatophyta; Magnoliopsida; eudicotyledons; Gunneridae; Pentapetalae; rosids; malvids; Brassicales; Brassicaceae; Camelineae; Arabidopsis	1.47933	1.18314	0.0341063	-0.257079	-0.596351	0.567676	-3.80017	-3.2176	-3.31679	0.360155	0.27925	0.59454	1.24401	0.776095	0.808229	1.49001	2.37145
1	Ntome_NODE_10288_length_2158_cov_9	.	0.823397	1.47547	1.41042	-0.176603	-0.398996	0.823397	-1.98396	-2.98396	-2.98396	-0.398996	0.0160419	-0.66203	1.1035	1.1035	1.40836	0.823397	0.601004
1	Ntome_NODE_1029_length_5053_cov_281	FUBP2_HUMAN^FUBP2_HUMAN^Q:4707-4024,H:72-305^32.099%ID^E:3.28e-20^RecName: Full=Far upstream element-binding protein 2;^Eukaryota; Metazoa; Chordata; Craniata; Vertebrata; Euteleostomi; Mammalia; Eutheria; Euarchontoglires; Primates; Haplorrhini; Catarrhini; Hominidae; Homo`FUBP2_HUMAN^FUBP2_HUMAN^Q:4527-4021,H:233-393^33.136%ID^E:2.81e-16^RecName: Full=Far upstream element-binding protein 2;^Euk…	2.3994	2.36135	0.350903	0.885312	0.40286	0.449165	-5.54513	-5.19885	-8.56483	1.58003	1.15057	0.89089	1.38988	1.36212	1.21003	1.96069	2.91561
1	Ntome_NODE_10290_length_2157_cov_288	GRIK2_ARATH^GRIK2_ARATH^Q:575-1786,H:5-391^65.025%ID^E:1.15e-176^RecName: Full=Serine/threonine-protein kinase GRIK2;^Eukaryota; Viridiplantae; Streptophyta; Embryophyta; Tracheophyta; Spermatophyta; Magnoliopsida; eudicotyledons; Gunneridae; Pentapetalae; rosids; malvids; Brassicales; Brassicaceae; Camelineae; Arabidopsis	0.99473	0.703955	-0.306665	0.833149	0.0934709	0.69423	-4.74282	-5.39933	-6.63812	1.1237	1.25815	1.10685	1.99636	1.40294	1.33756	2.52175	3.02009
1	Ntome_NODE_10291_length_2157_cov_268	FREE1_ARATH^FREE1_ARATH^Q:664-1752,H:238-601^71.429%ID^E:1.15e-171^RecName: Full=Protein FREE1 {ECO:0000303|PubMed:25438943};^Eukaryota; Viridiplantae; Streptophyta; Embryophyta; Tracheophyta; Spermatophyta; Magnoliopsida; eudicotyledons; Gunneridae; Pentapetalae; rosids; malvids; Brassicales; Brassicaceae; Camelineae; Arabidopsis	1.72301	1.63192	0.523156	0.735629	0.334572	0.293341	-5.38289	-6.13026	-5.98743	1.27751	1.37448	0.994441	1.80656	1.06936	0.992709	2.23031	2.51359
1	Ntome_NODE_10293_length_2157_cov_195	.	1.25159	1.31434	0.892466	0.571613	0.115396	0.616143	-5.43827	-4.42392	-5.43827	1.40093	0.876606	0.76884	1.19123	0.720994	0.78997	1.71015	3.08018
1	Ntome_NODE_10295_length_2157_cov_152	.	1.22108	-0.281415	1.38155	-0.059023	-0.059023	-0.54445	-2.86638	-1.28142	-2.86638	-0.54445	-1.28142	0.45555	0.940977	0.940977	0.718585	1.13362	2.9916
1	Ntome_NODE_10296_length_2157_cov_121	.	2.34093	2.28798	0.301399	1.03836	0.844192	0.689469	-6.03845	-6.03845	-6.03845	0.961661	1.39618	0.938829	1.53898	1.43728	1.19995	1.65504	1.48511
1	Ntome_NODE_10297_length_2157_cov_89	ERLI1_ARATH^ERLI1_ARATH^Q:1477-1725,H:84-167^67.857%ID^E:3.14e-25^RecName: Full=Lipid transfer protein EARLI 1;^Eukaryota; Viridiplantae; Streptophyta; Embryophyta; Tracheophyta; Spermatophyta; Magnoliopsida; eudicotyledons; Gunneridae; Pentapetalae; rosids; malvids; Brassicales; Brassicaceae; Camelineae; Arabidopsis	1.18287	1.17513	1.15973	1.36727	0.659003	1.36356	-6.62947	-5.84117	-7.06926	1.76651	1.91993	1.17742	1.94019	1.22271	0.617993	1.83977	2.14781
1	Ntome_NODE_1030_length_5048_cov_195	DMS3_ARATH^DMS3_ARATH^Q:3705-4382,H:115-339^42.105%ID^E:9.28e-41^RecName: Full=Protein DEFECTIVE IN MERISTEM SILENCING 3;^Eukaryota; Viridiplantae; Streptophyta; Embryophyta; Tracheophyta; Spermatophyta; Magnoliopsida; eudicotyledons; Gunneridae; Pentapetalae; rosids; malvids; Brassicales; Brassicaceae; Camelineae; Arabidopsis	0.0580531	-0.232328	-0.059319	-0.110483	-0.470254	-0.134302	-4.26039	-2.7964	-2.3343	1.19915	1.15719	0.931452	1.30822	0.469942	0.819242	2.1413	2.31323
1	Ntome_NODE_10300_length_2156_cov_299	PLCD2_ARATH^PLCD2_ARATH^Q:1927-143,H:1-581^61.167%ID^E:0^RecName: Full=Phosphoinositide phospholipase C 2;^Eukaryota; Viridiplantae; Streptophyta; Embryophyta; Tracheophyta; Spermatophyta; Magnoliopsida; eudicotyledons; Gunneridae; Pentapetalae; rosids; malvids; Brassicales; Brassicaceae; Camelineae; Arabidopsis	1.8127	1.47417	0.569067	0.988312	0.640568	1.25431	-7.23278	-5.27286	-8.36371	1.42493	1.11134	1.44358	2.44182	1.65687	1.02685	2.12189	2.90295
1	Ntome_NODE_10301_length_2156_cov_288	RZ21A_ORYSJ^RZ21A_ORYSJ^Q:595-810,H:31-102^70.833%ID^E:2.1e-25^RecName: Full=Serine/arginine-rich splicing factor RSZ21A;^Eukaryota; Viridiplantae; Streptophyta; Embryophyta; Tracheophyta; Spermatophyta; Magnoliopsida; Liliopsida; Poales; Poaceae; BOP clade; Oryzoideae; Oryzeae; Oryzinae; Oryza; Oryza sativa`RZ21A_ORYSJ^RZ21A_ORYSJ^Q:155-241,H:1-29^79.31%ID^E:4.75e-07^RecName: Full=Serine/arginin…	1.58026	1.48256	0.339727	0.248199	0.165358	-0.864706	-5.03568	-4.64032	-4.58901	1.40339	0.125926	1.64547	1.66296	0.605185	2.17111	2.17965	1.51994
1	Ntome_NODE_10302_length_2156_cov_284	.	1.39747	1.44112	0.506896	0.28302	0.473349	0.714866	-5.97191	-5.57138	-5.97191	1.30756	1.02549	0.811804	1.95752	1.55133	0.913294	2.4204	2.71108
1	Ntome_NODE_10303_length_2156_cov_277	NFD4_ARATH^NFD4_ARATH^Q:2102-492,H:44-565^30.182%ID^E:5.29e-51^RecName: Full=Protein NUCLEAR FUSION DEFECTIVE 4 {ECO:0000303|PubMed:16698901};^Eukaryota; Viridiplantae; Streptophyta; Embryophyta; Tracheophyta; Spermatophyta; Magnoliopsida; eudicotyledons; Gunneridae; Pentapetalae; rosids; malvids; Brassicales; Brassicaceae; Camelineae; Arabidopsis	1.42242	1.12534	0.0752368	0.899171	0.396168	1.3424	-6.26604	-6.26604	-6.26604	1.46182	1.09626	1.19585	1.67525	1.44676	1.11741	2.43423	3.10981
1	Ntome_NODE_10305_length_2156_cov_243	LRP6B_ARATH^LRP6B_ARATH^Q:1545-787,H:178-434^57.143%ID^E:3.1e-87^RecName: Full=La-related protein 6B;^Eukaryota; Viridiplantae; Streptophyta; Embryophyta; Tracheophyta; Spermatophyta; Magnoliopsida; eudicotyledons; Gunneridae; Pentapetalae; rosids; malvids; Brassicales; Brassicaceae; Camelineae; Arabidopsis	1.5139	1.51174	0.286547	0.473325	0.52124	0.581407	-6.54571	-4.87215	-6.54571	1.40201	1.10986	0.591691	1.75515	1.49863	1.19731	2.58872	2.93205
1	Ntome_NODE_10306_length_2156_cov_168	EPHA_MYCTU^EPHA_MYCTU^Q:2039-1359,H:1-237^31.276%ID^E:1.05e-30^RecName: Full=Epoxide hydrolase A {ECO:0000303|PubMed:16511284};^Bacteria; Actinobacteria; Corynebacteriales; Mycobacteriaceae; Mycobacterium; Mycobacterium tuberculosis complex	2.16527	1.72893	0.696797	0.301764	-0.513496	0.854735	-5.21394	-4.21394	-5.21394	0.254973	0.222026	0.00135429	2.0356	1.19579	1.00717	2.06758	2.62331
1	Ntome_NODE_10307_length_2156_cov_168	OS9_ARATH^OS9_ARATH^Q:22-696,H:21-240^59.031%ID^E:7.83e-90^RecName: Full=Protein OS-9 homolog {ECO:0000305};^Eukaryota; Viridiplantae; Streptophyta; Embryophyta; Tracheophyta; Spermatophyta; Magnoliopsida; eudicotyledons; Gunneridae; Pentapetalae; rosids; malvids; Brassicales; Brassicaceae; Camelineae; Arabidopsis	1.71111	1.70962	0.765455	0.90002	0.499368	1.22548	-6.88925	-5.75175	-6.88925	1.38235	0.605083	0.781191	2.10187	1.34134	1.52632	1.96851	3.01253
1	Ntome_NODE_10308_length_2156_cov_135	FBL88_ARATH^FBL88_ARATH^Q:801-1166,H:2-131^36.296%ID^E:1.95e-15^RecName: Full=Putative F-box/LRR-repeat protein At5g41840;^Eukaryota; Viridiplantae; Streptophyta; Embryophyta; Tracheophyta; Spermatophyta; Magnoliopsida; eudicotyledons; Gunneridae; Pentapetalae; rosids; malvids; Brassicales; Brassicaceae; Camelineae; Arabidopsis`FBL88_ARATH^FBL88_ARATH^Q:1208-1501,H:163-271^29.204%ID^E:1.95e-15^Re…	1.07478	1.21128	0.625883	0.166452	0.122043	-0.374117	-4.83355	-3.24859	-4.83355	1.12065	-0.0261934	-0.0786608	1.5063	1.6583	1.07334	1.89437	2.94124
1	Ntome_NODE_1031_length_5044_cov_259	.	1.82731	1.61075	0.726186	0.427309	0.337061	0.806541	-5.93103	-6.93823	-6.93823	1.92986	1.03808	1.63671	1.86374	1.48043	1.39094	1.92596	2.80661
1	Ntome_NODE_10310_length_2156_cov_68	NSTU2_ARATH^NSTU2_ARATH^Q:1349-237,H:1-373^79.893%ID^E:0^RecName: Full=Nucleotide-sugar uncharacterized transporter 2 {ECO:0000305};^Eukaryota; Viridiplantae; Streptophyta; Embryophyta; Tracheophyta; Spermatophyta; Magnoliopsida; eudicotyledons; Gunneridae; Pentapetalae; rosids; malvids; Brassicales; Brassicaceae; Camelineae; Arabidopsis	2.48754	2.25866	1.26416	0.243529	1.09186	0.897561	-4.03743	-4.03743	-4.03743	-1.89338	-1.26977	-1.83579	1.06607	0.915838	0.306691	2.90333	3.67599
1	Ntome_NODE_10311_length_2155_cov_263	.	0.898717	0.929369	0.517617	0.113476	-0.654866	0.0880532	-2.91137	-3.04609	-2.94418	0.864018	-0.142258	0.15985	1.13116	0.837887	0.145161	1.6	2.41345
1	Ntome_NODE_10313_length_2155_cov_243	SPG1_SCHPO^SPG1_SCHPO^Q:396-956,H:9-195^44.385%ID^E:2.35e-52^RecName: Full=Septum-promoting GTP-binding protein 1;^Eukaryota; Fungi; Dikarya; Ascomycota; Taphrinomycotina; Schizosaccharomycetes; Schizosaccharomycetales; Schizosaccharomycetaceae; Schizosaccharomyces	1.37697	1.40696	-0.030308	0.213003	-0.183656	0.834491	-4.00744	-4.23021	-5.03031	0.804037	0.537265	0.244537	1.65135	0.695524	0.465636	2.33992	2.91224
1	Ntome_NODE_10314_length_2155_cov_220	PKS1_ARATH^PKS1_ARATH^Q:417-1535,H:74-400^33.333%ID^E:1.47e-38^RecName: Full=Protein PHYTOCHROME KINASE SUBSTRATE 1;^Eukaryota; Viridiplantae; Streptophyta; Embryophyta; Tracheophyta; Spermatophyta; Magnoliopsida; eudicotyledons; Gunneridae; Pentapetalae; rosids; malvids; Brassicales; Brassicaceae; Camelineae; Arabidopsis	1.51577	1.68744	0.792688	0.964869	-0.0716569	1.64294	-5.35706	-5.35706	-5.35706	1.11152	-0.197995	0.769749	1.17261	0.524361	1.74843	1.76188	2.64857
1	Ntome_NODE_10315_length_2155_cov_135	PEK15_ARATH^PEK15_ARATH^Q:1025-372,H:282-502^68.778%ID^E:1.04e-96^RecName: Full=Proline-rich receptor-like protein kinase PERK15;^Eukaryota; Viridiplantae; Streptophyta; Embryophyta; Tracheophyta; Spermatophyta; Magnoliopsida; eudicotyledons; Gunneridae; Pentapetalae; rosids; malvids; Brassicales; Brassicaceae; Camelineae; Arabidopsis	0.869091	0.703861	0.0324932	1.14729	0.0713908	0.87314	-4.51357	-6.13181	-4.06486	0.803296	1.26625	0.543582	1.82128	0.765309	0.55427	2.62027	2.63872
1	Ntome_NODE_10316_length_2155_cov_74	SLAH4_ARATH^SLAH4_ARATH^Q:2137-1334,H:1-257^55.597%ID^E:2.62e-79^RecName: Full=S-type anion channel SLAH4;^Eukaryota; Viridiplantae; Streptophyta; Embryophyta; Tracheophyta; Spermatophyta; Magnoliopsida; eudicotyledons; Gunneridae; Pentapetalae; rosids; malvids; Brassicales; Brassicaceae; Camelineae; Arabidopsis`SLAH4_ARATH^SLAH4_ARATH^Q:477-256,H:277-350^48.649%ID^E:4.35e-09^RecName: Full=S-type…	-0.502969	1.13596	-0.0944154	1.72335	-0.85472	-0.47732	-2.58277	-3.66001	-3.66001	2.59587	0.7548	-2.41513	2.44747	2.1802	1.4168	-0.200581	2.19348
1	Ntome_NODE_10317_length_2155_cov_34	NU1C_TOBAC^NU1C_TOBAC^Q:648-103,H:171-352^86.813%ID^E:6.38e-99^RecName: Full=NAD(P)H-quinone oxidoreductase subunit 1, chloroplastic {ECO:0000255|HAMAP-Rule:MF_01350};^Eukaryota; Viridiplantae; Streptophyta; Embryophyta; Tracheophyta; Spermatophyta; Magnoliopsida; eudicotyledons; Gunneridae; Pentapetalae; asterids; lamiids; Solanales; Solanaceae; Nicotianoideae; Nicotianeae; Nicotiana	0.89267	0.416409	-0.20089	-1.52282	-1.36147	0.0621446	-0.643112	-0.980147	-1.10778	0.284537	-1.10058	0.140906	0.796704	0.0549131	0.900312	1.64309	1.72511
1	Ntome_NODE_1032_length_5044_cov_205	PP4R3_DANRE^PP4R3_DANRE^Q:371-1981,H:6-551^36.234%ID^E:7.75e-93^RecName: Full=Serine/threonine-protein phosphatase 4 regulatory subunit 3;^Eukaryota; Metazoa; Chordata; Craniata; Vertebrata; Euteleostomi; Actinopterygii; Neopterygii; Teleostei; Ostariophysi; Cypriniformes; Cyprinidae; Danio`PP4R3_DANRE^PP4R3_DANRE^Q:3505-3747,H:553-633^39.506%ID^E:6.15e-13^RecName: Full=Serine/threonine-protein p…	1.87337	1.44533	0.669865	0.241973	0.0765217	0.0561894	-4.6488	-4.38657	-6.06303	1.09644	0.800604	0.833086	1.5619	1.3172	0.959784	1.7819	2.38424
1	Ntome_NODE_10322_length_2154_cov_292	AP2A1_ARATH^AP2A1_ARATH^Q:2152-620,H:471-972^73.438%ID^E:0^RecName: Full=AP-2 complex subunit alpha-1;^Eukaryota; Viridiplantae; Streptophyta; Embryophyta; Tracheophyta; Spermatophyta; Magnoliopsida; eudicotyledons; Gunneridae; Pentapetalae; rosids; malvids; Brassicales; Brassicaceae; Camelineae; Arabidopsis	1.92913	1.66399	0.425899	0.244287	0.550055	0.272806	-5.59113	-3.51047	-5.59113	0.780775	0.353492	0.453699	1.46067	1.48622	0.343384	1.73071	2.99762
1	Ntome_NODE_10323_length_2154_cov_289	TT9_ARATH^TT9_ARATH^Q:2154-532,H:298-833^57.643%ID^E:0^RecName: Full=Protein TRANSPARENT TESTA 9 {ECO:0000303|PubMed:8528278};^Eukaryota; Viridiplantae; Streptophyta; Embryophyta; Tracheophyta; Spermatophyta; Magnoliopsida; eudicotyledons; Gunneridae; Pentapetalae; rosids; malvids; Brassicales; Brassicaceae; Camelineae; Arabidopsis	1.30035	1.60942	-0.00157352	0.407204	-0.110959	0.595063	-3.85755	-6.54909	-5.4787	1.17611	0.891037	0.755243	1.86433	1.48802	1.3702	1.81159	2.72929
1	Ntome_NODE_10325_length_2154_cov_237	DTX55_ARATH^DTX55_ARATH^Q:1722-247,H:13-500^63.083%ID^E:0^RecName: Full=Protein DETOXIFICATION 55 {ECO:0000303|PubMed:11739388};^Eukaryota; Viridiplantae; Streptophyta; Embryophyta; Tracheophyta; Spermatophyta; Magnoliopsida; eudicotyledons; Gunneridae; Pentapetalae; rosids; malvids; Brassicales; Brassicaceae; Camelineae; Arabidopsis	2.30439	1.80112	-0.127879	0.366995	-0.0613284	-0.0972974	-4.51816	-4.14065	-5.36895	0.663456	0.922605	0.394367	1.45655	1.36302	0.92684	2.02197	2.09294
1	Ntome_NODE_10326_length_2154_cov_225	SIS3_ARATH^SIS3_ARATH^Q:1806-790,H:1-342^76.608%ID^E:0^RecName: Full=E3 ubiquitin-protein ligase SIS3;^Eukaryota; Viridiplantae; Streptophyta; Embryophyta; Tracheophyta; Spermatophyta; Magnoliopsida; eudicotyledons; Gunneridae; Pentapetalae; rosids; malvids; Brassicales; Brassicaceae; Camelineae; Arabidopsis	1.36633	1.44902	-1.16896	0.734861	0.539494	0.372062	-5.60659	-3.92402	-4.52935	0.883016	0.989897	0.839334	1.0338	1.10655	0.642475	2.17477	3.09731
1	Ntome_NODE_10327_length_2154_cov_215	.	1.78624	1.81178	0.4064	-0.295311	-0.69995	-0.0879222	-4.63886	-3.62111	-4.01167	1.099	0.831729	0.640855	0.787405	1.01808	1.20998	1.77271	1.99064
1	Ntome_NODE_10328_length_2154_cov_202	GATL9_ARATH^GATL9_ARATH^Q:800-1771,H:51-377^78.287%ID^E:0^RecName: Full=Probable galacturonosyltransferase-like 9;^Eukaryota; Viridiplantae; Streptophyta; Embryophyta; Tracheophyta; Spermatophyta; Magnoliopsida; eudicotyledons; Gunneridae; Pentapetalae; rosids; malvids; Brassicales; Brassicaceae; Camelineae; Arabidopsis	0.650679	0.919969	-0.694741	0.885706	0.63916	0.786924	-5.2797	-5.2797	-6.2797	2.11442	1.53523	0.374073	1.70671	2.05318	2.9288	1.44392	1.49508
1	Ntome_NODE_10329_length_2154_cov_112	.	0.601692	1.78551	0.923157	1.20675	1.68377	1.06336	-3.35854	-2.99397	-5.35854	0.634001	0.305088	0.366382	-0.155732	-0.586656	-0.168321	2.25123	1.80083
1	Ntome_NODE_1033_length_5041_cov_109	KIME_ARATH^KIME_ARATH^Q:4166-4684,H:211-378^71.098%ID^E:3.08e-62^RecName: Full=Mevalonate kinase {ECO:0000305};^Eukaryota; Viridiplantae; Streptophyta; Embryophyta; Tracheophyta; Spermatophyta; Magnoliopsida; eudicotyledons; Gunneridae; Pentapetalae; rosids; malvids; Brassicales; Brassicaceae; Camelineae; Arabidopsis`KIME_ARATH^KIME_ARATH^Q:290-916,H:1-211^66.197%ID^E:5.7e-57^RecName: Full=Mevalo…	0.917253	0.758291	-0.697687	0.574817	0.335633	0.861115	-6.09923	-3.81807	-5.41503	1.35458	1.20271	1.15623	1.91157	1.57184	0.713859	1.92082	2.75128
1	Ntome_NODE_10331_length_2154_cov_14	.	0.567917	0.830951	0.468381	0.120458	-0.754011	-0.531619	-3.33897	-1.75401	-0.531619	0.361466	-0.754011	0.567917	0.982954	0.468381	0.120458	1.30488	1.87048
1	Ntome_NODE_10332_length_2153_cov_260	HXK1_TOBAC^HXK1_TOBAC^Q:1830-412,H:25-497^99.789%ID^E:0^RecName: Full=Hexokinase-1;^Eukaryota; Viridiplantae; Streptophyta; Embryophyta; Tracheophyta; Spermatophyta; Magnoliopsida; eudicotyledons; Gunneridae; Pentapetalae; asterids; lamiids; Solanales; Solanaceae; Nicotianoideae; Nicotianeae; Nicotiana	0.875863	0.97653	-0.435944	-0.0250107	-0.547706	0.101681	-3.26729	-4.09814	-3.81161	1.14146	1.17542	0.905806	1.06988	0.964024	0.781731	1.80027	2.39304
1	Ntome_NODE_10334_length_2153_cov_184	TBL34_ARATH^TBL34_ARATH^Q:843-1868,H:62-405^59.42%ID^E:4.94e-147^RecName: Full=Protein trichome birefringence-like 34;^Eukaryota; Viridiplantae; Streptophyta; Embryophyta; Tracheophyta; Spermatophyta; Magnoliopsida; eudicotyledons; Gunneridae; Pentapetalae; rosids; malvids; Brassicales; Brassicaceae; Camelineae; Arabidopsis	1.37169	1.7111	-0.313066	0.691476	0.170503	0.755775	-4.78555	-4.78555	-4.78555	0.912942	1.38317	0.685308	1.94386	0.472211	0.428182	1.56335	2.58016
1	Ntome_NODE_10335_length_2153_cov_157	RL10_SOLME^RL10_SOLME^Q:1250-609,H:5-218^97.664%ID^E:7.35e-148^RecName: Full=60S ribosomal protein L10;^Eukaryota; Viridiplantae; Streptophyta; Embryophyta; Tracheophyta; Spermatophyta; Magnoliopsida; eudicotyledons; Gunneridae; Pentapetalae; asterids; lamiids; Solanales; Solanaceae; Solanoideae; Solaneae; Solanum	2.32014	1.95439	0.267617	1.07972	0.257032	0.921726	-6.92596	-5.26603	-6.37014	1.0983	0.882813	0.759352	1.42122	1.21717	0.794252	1.99073	3.59767
1	Ntome_NODE_10336_length_2150_cov_119	UXT1_ARATH^UXT1_ARATH^Q:195-722,H:1-176^82.386%ID^E:9.46e-94^RecName: Full=UDP-xylose transporter 1 {ECO:0000312|EMBL:AKA88212.1};^Eukaryota; Viridiplantae; Streptophyta; Embryophyta; Tracheophyta; Spermatophyta; Magnoliopsida; eudicotyledons; Gunneridae; Pentapetalae; rosids; malvids; Brassicales; Brassicaceae; Camelineae; Arabidopsis`UXT1_ARATH^UXT1_ARATH^Q:1329-1841,H:168-336^73.684%ID^E:2.16e…	-2.65411	-0.632051	-1.15909	0.937312	1.65416	2.44742	-7.60037	-7.60037	-6.57889	3.12303	2.4764	2.73538	3.3127	2.535	2.27785	2.63109	2.09454
1	Ntome_NODE_10337_length_2153_cov_98	PTR6_ARATH^PTR6_ARATH^Q:233-1999,H:7-601^57.309%ID^E:0^RecName: Full=Protein NRT1/ PTR FAMILY 1.2;^Eukaryota; Viridiplantae; Streptophyta; Embryophyta; Tracheophyta; Spermatophyta; Magnoliopsida; eudicotyledons; Gunneridae; Pentapetalae; rosids; malvids; Brassicales; Brassicaceae; Camelineae; Arabidopsis	1.53228	1.23916	-0.626587	0.749469	0.331088	0.20137	-3.80834	-4.46169	-3.89552	1.94853	1.13577	0.485489	0.344667	0.42546	0.342914	2.25722	1.79872
1	Ntome_NODE_10338_length_2153_cov_77	PUB4_ARATH^PUB4_ARATH^Q:1468-632,H:543-820^49.104%ID^E:3.09e-47^RecName: Full=U-box domain-containing protein 4;^Eukaryota; Viridiplantae; Streptophyta; Embryophyta; Tracheophyta; Spermatophyta; Magnoliopsida; eudicotyledons; Gunneridae; Pentapetalae; rosids; malvids; Brassicales; Brassicaceae; Camelineae; Arabidopsis	1.63755	1.30106	0.116759	1.66708	0.743786	0.368161	-5.76955	-3.76235	-5.76955	1.35105	0.963807	0.0496099	1.16166	1.04295	-0.136407	2.24168	2.7927
1	Ntome_NODE_1034_length_5041_cov_90	.	1.15636	0.884977	-0.0663352	0.384866	0.152275	-0.520892	-3.95653	-4.12889	-4.35926	0.852589	1.45168	0.621499	1.70096	1.05851	0.918942	1.98652	1.86273
1	Ntome_NODE_10340_length_2152_cov_301	DRB2_ARATH^DRB2_ARATH^Q:1899-682,H:1-398^54.545%ID^E:1.3e-110^RecName: Full=Double-stranded RNA-binding protein 2;^Eukaryota; Viridiplantae; Streptophyta; Embryophyta; Tracheophyta; Spermatophyta; Magnoliopsida; eudicotyledons; Gunneridae; Pentapetalae; rosids; malvids; Brassicales; Brassicaceae; Camelineae; Arabidopsis	1.77566	1.49978	0.746978	0.641853	0.475391	1.0762	-6.58466	-4.20614	-6.58466	1.40124	0.422988	1.00698	1.50015	1.24005	0.704625	2.33122	2.55234
1	Ntome_NODE_10341_length_2152_cov_285	CP511_ARATH^CP511_ARATH^Q:1763-465,H:36-469^82.719%ID^E:0^RecName: Full=Sterol 14-demethylase;^Eukaryota; Viridiplantae; Streptophyta; Embryophyta; Tracheophyta; Spermatophyta; Magnoliopsida; eudicotyledons; Gunneridae; Pentapetalae; rosids; malvids; Brassicales; Brassicaceae; Camelineae; Arabidopsis	1.59024	1.44126	-0.479434	1.41608	1.10514	0.58465	-6.36979	-5.64166	-7.06364	1.88871	1.52527	1.43915	1.45814	1.53203	1.10586	2.04727	2.42073
1	Ntome_NODE_10342_length_2152_cov_260	DTX24_ARATH^DTX24_ARATH^Q:412-1791,H:30-490^56.399%ID^E:0^RecName: Full=Protein DETOXIFICATION 24 {ECO:0000303|PubMed:11739388};^Eukaryota; Viridiplantae; Streptophyta; Embryophyta; Tracheophyta; Spermatophyta; Magnoliopsida; eudicotyledons; Gunneridae; Pentapetalae; rosids; malvids; Brassicales; Brassicaceae; Camelineae; Arabidopsis	2.23286	1.68258	0.745263	0.034159	-0.60067	0.380271	-3.74338	-3.21186	-4.07353	0.773609	1.33363	0.304983	0.942356	0.249223	-0.897206	1.55957	2.28814
1	Ntome_NODE_10343_length_2152_cov_254	SERA1_ARATH^SERA1_ARATH^Q:217-1926,H:31-603^82.23%ID^E:0^RecName: Full=D-3-phosphoglycerate dehydrogenase 1, chloroplastic;^Eukaryota; Viridiplantae; Streptophyta; Embryophyta; Tracheophyta; Spermatophyta; Magnoliopsida; eudicotyledons; Gunneridae; Pentapetalae; rosids; malvids; Brassicales; Brassicaceae; Camelineae; Arabidopsis	2.35886	2.43946	0.593136	0.677193	0.633438	0.350599	-5.23717	-5.93914	-7.05684	1.07079	1.09342	0.23235	1.33066	1.56869	0.814758	2.39024	2.67956
1	Ntome_NODE_10344_length_2152_cov_254	P2C64_ARATH^P2C64_ARATH^Q:1740-565,H:1-392^76.02%ID^E:0^RecName: Full=Probable protein phosphatase 2C 64;^Eukaryota; Viridiplantae; Streptophyta; Embryophyta; Tracheophyta; Spermatophyta; Magnoliopsida; eudicotyledons; Gunneridae; Pentapetalae; rosids; malvids; Brassicales; Brassicaceae; Camelineae; Arabidopsis	1.3123	1.43516	-0.52089	0.739559	0.0558724	0.167317	-2.30769	-3.73259	-4.63265	0.702753	0.387854	-0.331026	1.53472	0.660548	0.798583	1.01676	2.71342
1	Ntome_NODE_10345_length_2152_cov_211	ATAD3_CAEEL^ATAD3_CAEEL^Q:1985-342,H:47-559^38.628%ID^E:1.06e-101^RecName: Full=ATPase family AAA domain-containing protein 3;^Eukaryota; Metazoa; Ecdysozoa; Nematoda; Chromadorea; Rhabditida; Rhabditina; Rhabditomorpha; Rhabditoidea; Rhabditidae; Peloderinae; Caenorhabditis	1.81161	1.70719	1.0021	0.455225	0.304251	0.728671	-4.63369	-4.19792	-4.1537	0.746192	0.469876	-0.556086	1.02783	0.903101	0.122464	1.55614	2.70675
1	Ntome_NODE_10346_length_2152_cov_193	.	0.773535	0.599143	0.259827	1.21145	-0.32754	1.08316	-3.64802	-2.13201	-2.64802	-0.0678793	-1.06306	0.471331	0.569981	1.40726	0.657216	0.932724	1.92092
1	Ntome_NODE_10347_length_2152_cov_148	AGD5_ARATH^AGD5_ARATH^Q:209-1618,H:1-482^48.643%ID^E:4.36e-125^RecName: Full=ADP-ribosylation factor GTPase-activating protein AGD5 {ECO:0000303|PubMed:12644670};^Eukaryota; Viridiplantae; Streptophyta; Embryophyta; Tracheophyta; Spermatophyta; Magnoliopsida; eudicotyledons; Gunneridae; Pentapetalae; rosids; malvids; Brassicales; Brassicaceae; Camelineae; Arabidopsis	1.77012	1.35744	1.24594	0.695468	-1.17776	0.133379	-5.25756	-5.25756	-5.25756	0.871101	1.04585	0.414296	1.9017	1.00829	1.13355	2.42142	2.95189
1	Ntome_NODE_10348_length_2152_cov_140	.	0.929728	0.799148	-0.452977	-0.0399632	0.432935	-0.940225	-4.28789	-2.68857	-4.28789	0.622842	0.498706	0.836851	1.52409	1.22528	1.09789	2.36244	2.3676
1	Ntome_NODE_10349_length_2152_cov_117	ISPE_SOLLC^ISPE_SOLLC^Q:404-1042,H:30-242^92.958%ID^E:5.38e-123^RecName: Full=4-diphosphocytidyl-2-C-methyl-D-erythritol kinase, chloroplastic/chromoplastic;^Eukaryota; Viridiplantae; Streptophyta; Embryophyta; Tracheophyta; Spermatophyta; Magnoliopsida; eudicotyledons; Gunneridae; Pentapetalae; asterids; lamiids; Solanales; Solanaceae; Solanoideae; Solaneae; Solanum; Lycopersicon	2.3639	1.97303	0.743554	0.942177	-0.140266	0.88116	-6.10582	-6.10582	-6.10582	1.10149	0.57042	0.814712	1.73942	0.867218	0.812328	2.50749	3.14083
1	Ntome_NODE_1035_length_5040_cov_301	SNL2_ARATH^SNL2_ARATH^Q:200-4246,H:1-1366^54.565%ID^E:0^RecName: Full=Paired amphipathic helix protein Sin3-like 2;^Eukaryota; Viridiplantae; Streptophyta; Embryophyta; Tracheophyta; Spermatophyta; Magnoliopsida; eudicotyledons; Gunneridae; Pentapetalae; rosids; malvids; Brassicales; Brassicaceae; Camelineae; Arabidopsis	1.23467	1.21408	-0.235807	-0.571352	-0.26362	-0.0790026	-2.89093	-2.90109	-2.88929	0.40119	0.349467	0.169275	1.19667	0.837445	0.854869	1.67533	1.8981
1	Ntome_NODE_10350_length_2152_cov_102	ADXH1_DROME^ADXH1_DROME^Q:1949-1608,H:51-158^33.333%ID^E:2.61e-09^RecName: Full=Adrenodoxin-like protein 1, mitochondrial {ECO:0000305};^Eukaryota; Metazoa; Ecdysozoa; Arthropoda; Hexapoda; Insecta; Pterygota; Neoptera; Holometabola; Diptera; Brachycera; Muscomorpha; Ephydroidea; Drosophilidae; Drosophila; Sophophora	1.30681	0.763901	0.116757	0.0632837	-0.730573	-0.500256	-2.97555	-3.44569	-3.01108	1.29019	1.1651	1.52015	0.764682	-0.204699	0.437884	1.30011	2.13899
1	Ntome_NODE_10351_length_2152_cov_36	.	-1.34129	0.828632	0.466062	1.11814	0.828632	-0.341293	-2.34129	-2.34129	-2.34129	0.243669	-0.756331	-0.0193653	0.466062	0.828632	0.466062	2.11814	2.11814
1	Ntome_NODE_10356_length_2151_cov_201	NPC6_ARATH^NPC6_ARATH^Q:2068-548,H:3-517^75.29%ID^E:0^RecName: Full=Non-specific phospholipase C6;^Eukaryota; Viridiplantae; Streptophyta; Embryophyta; Tracheophyta; Spermatophyta; Magnoliopsida; eudicotyledons; Gunneridae; Pentapetalae; rosids; malvids; Brassicales; Brassicaceae; Camelineae; Arabidopsis	1.50302	1.03921	0.592045	1.21824	0.491938	1.61646	-6.01173	-6.01173	-6.01173	1.12188	0.321337	1.17513	1.50681	1.25927	0.055221	2.66055	3.47408
1	Ntome_NODE_10357_length_2151_cov_150	RTNLP_ARATH^RTNLP_ARATH^Q:2128-1652,H:2-149^59.119%ID^E:2.91e-47^RecName: Full=Reticulon-like protein B16;^Eukaryota; Viridiplantae; Streptophyta; Embryophyta; Tracheophyta; Spermatophyta; Magnoliopsida; eudicotyledons; Gunneridae; Pentapetalae; rosids; malvids; Brassicales; Brassicaceae; Camelineae; Arabidopsis`RTNLP_ARATH^RTNLP_ARATH^Q:708-478,H:148-225^60.256%ID^E:2.76e-21^RecName: Full=Reticu…	0.310126	0.136607	-1.63388	-0.0136677	-0.349874	-0.800038	-1.02331	-2.04194	-2.14375	1.31324	1.11052	0.609283	0.791477	0.637674	0.99522	0.948438	1.15389
1	Ntome_NODE_10358_length_2151_cov_114	DRG1_ARATH^DRG1_ARATH^Q:804-601,H:277-344^73.529%ID^E:4.71e-28^RecName: Full=Developmentally-regulated G-protein 1;^Eukaryota; Viridiplantae; Streptophyta; Embryophyta; Tracheophyta; Spermatophyta; Magnoliopsida; eudicotyledons; Gunneridae; Pentapetalae; rosids; malvids; Brassicales; Brassicaceae; Camelineae; Arabidopsis`DRG1_ARATH^DRG1_ARATH^Q:1614-1492,H:234-274^87.805%ID^E:1.03e-17^RecName: Fu…	1.87057	1.298	0.597556	0.472025	-0.0805158	0.65645	-2.98741	-3.98741	-1.98741	0.472025	0.404911	0.334522	1.53616	0.182519	-0.286967	-0.180051	1.68502
1	Ntome_NODE_10359_length_2150_cov_226	OEP80_ARATH^OEP80_ARATH^Q:59-2101,H:4-713^67.978%ID^E:0^RecName: Full=Outer envelope protein 80, chloroplastic;^Eukaryota; Viridiplantae; Streptophyta; Embryophyta; Tracheophyta; Spermatophyta; Magnoliopsida; eudicotyledons; Gunneridae; Pentapetalae; rosids; malvids; Brassicales; Brassicaceae; Camelineae; Arabidopsis	1.2083	0.8204	-0.289185	0.464279	-0.289978	0.309048	-3.71922	-3.6044	-3.58288	0.455797	1.08654	0.461575	1.16314	1.07835	0.397327	1.79424	2.24667
1	Ntome_NODE_1036_length_5035_cov_263	SWTIE_ARATH^SWTIE_ARATH^Q:4733-3,H:1-1557^65.484%ID^E:0^RecName: Full=Protein SWEETIE {ECO:0000303|PubMed:18452589};^Eukaryota; Viridiplantae; Streptophyta; Embryophyta; Tracheophyta; Spermatophyta; Magnoliopsida; eudicotyledons; Gunneridae; Pentapetalae; rosids; malvids; Brassicales; Brassicaceae; Camelineae; Arabidopsis	1.4827	1.40958	0.407609	-0.614454	-0.135939	0.134003	-3.22549	-5.21938	-3.18804	1.07064	0.419396	0.385847	0.678953	1.27252	-0.0282234	2.07328	3.07701
1	Ntome_NODE_10360_length_2150_cov_199	DIOX2_ARATH^DIOX2_ARATH^Q:162-1151,H:1-332^70.659%ID^E:1.02e-173^RecName: Full=Probable 2-oxoglutarate-dependent dioxygenase At3g50210;^Eukaryota; Viridiplantae; Streptophyta; Embryophyta; Tracheophyta; Spermatophyta; Magnoliopsida; eudicotyledons; Gunneridae; Pentapetalae; rosids; malvids; Brassicales; Brassicaceae; Camelineae; Arabidopsis	1.73341	1.89722	0.437648	0.197516	0.174351	0.200342	-5.72237	-7.47512	-7.47512	2.09441	2.20836	1.64257	2.54394	2.16964	1.96639	1.7384	1.66842
1	Ntome_NODE_10361_length_2150_cov_191	C96AF_ARATH^C96AF_ARATH^Q:1765-272,H:13-496^42.857%ID^E:3.22e-128^RecName: Full=Alkane hydroxylase MAH1 {ECO:0000303|PubMed:17905869};^Eukaryota; Viridiplantae; Streptophyta; Embryophyta; Tracheophyta; Spermatophyta; Magnoliopsida; eudicotyledons; Gunneridae; Pentapetalae; rosids; malvids; Brassicales; Brassicaceae; Camelineae; Arabidopsis	2.29403	2.29125	1.21698	0.557697	-0.153231	0.534675	-6.621	-6.62459	-7.03843	1.67653	0.985061	1.50504	1.87724	2.12051	1.55099	1.09461	2.73263
1	Ntome_NODE_10362_length_2150_cov_188	.	1.15994	1.09194	0.638366	0.413892	0.673619	0.569059	-4.5635	-5.5707	-5.5707	1.32084	1.00416	1.08966	1.15845	1.49194	0.284296	2.14155	2.66718
1	Ntome_NODE_10363_length_2150_cov_177	.	2.06943	1.50528	0.992696	0.536343	0.0646944	0.832346	-6.74998	-4.74279	-6.74998	1.32287	1.38716	1.21718	1.87287	1.15751	0.575186	2.22927	2.47992
1	Ntome_NODE_10364_length_2150_cov_167	RPAC1_DICDI^RPAC1_DICDI^Q:1903-1220,H:9-215^40.773%ID^E:4.83e-41^RecName: Full=DNA-directed RNA polymerases I and III subunit rpac1;^Eukaryota; Amoebozoa; Mycetozoa; Dictyostelids; Dictyosteliales; Dictyosteliaceae; Dictyostelium`RPAC1_DICDI^RPAC1_DICDI^Q:739-353,H:209-333^50.388%ID^E:2.42e-35^RecName: Full=DNA-directed RNA polymerases I and III subunit rpac1;^Eukaryota; Amoebozoa; Mycetozoa; Dic…	1.63314	1.29169	0.542374	0.144905	-0.0371355	0.244666	-3.91738	-3.03906	-3.50766	0.404902	0.11777	-0.487501	1.18827	1.22167	-0.0825055	1.58278	2.69906
1	Ntome_NODE_10365_length_2150_cov_114	.	2.5679	2.76714	1.05927	-0.0747344	-0.0127499	0.45106	-4.87123	-4.87123	-4.87123	0.619663	0.37556	0.585906	0.74701	0.448895	0.297494	1.89762	2.88366
1	Ntome_NODE_10366_length_2150_cov_101	PIMT1_ARATH^PIMT1_ARATH^Q:1455-1868,H:92-229^76.812%ID^E:1.13e-69^RecName: Full=Protein-L-isoaspartate O-methyltransferase 1;^Eukaryota; Viridiplantae; Streptophyta; Embryophyta; Tracheophyta; Spermatophyta; Magnoliopsida; eudicotyledons; Gunneridae; Pentapetalae; rosids; malvids; Brassicales; Brassicaceae; Camelineae; Arabidopsis	1.41262	1.56688	-0.71389	1.38419	0.817148	0.168073	-4.41606	-4.34781	-5.75809	1.33448	1.41403	1.0361	0.996209	0.943381	1.26952	1.50643	1.38679
1	Ntome_NODE_10368_length_2150_cov_40	.	1.66648	0.357012	0.341085	0.922038	-2.09321	0.812719	-3.09321	-3.09321	-1.09321	0.465058	0.600556	-0.607783	1.53031	0.608339	-0.894716	1.05084	2.52091
1	Ntome_NODE_10369_length_2149_cov_269	STY13_ARATH^STY13_ARATH^Q:608-1444,H:112-384^46.643%ID^E:1.67e-73^RecName: Full=Serine/threonine-protein kinase STY13 {ECO:0000305};^Eukaryota; Viridiplantae; Streptophyta; Embryophyta; Tracheophyta; Spermatophyta; Magnoliopsida; eudicotyledons; Gunneridae; Pentapetalae; rosids; malvids; Brassicales; Brassicaceae; Camelineae; Arabidopsis	2.62581	2.30449	1.02666	0.465916	0.807308	1.06388	-6.58299	-5.97774	-7.95594	1.53792	1.22569	1.41492	1.0718	0.937728	0.519228	2.86579	2.64954
1	Ntome_NODE_1037_length_5031_cov_219	PAS1_ARATH^PAS1_ARATH^Q:2871-4646,H:29-624^70.017%ID^E:0^RecName: Full=Peptidyl-prolyl cis-trans isomerase PASTICCINO1;^Eukaryota; Viridiplantae; Streptophyta; Embryophyta; Tracheophyta; Spermatophyta; Magnoliopsida; eudicotyledons; Gunneridae; Pentapetalae; rosids; malvids; Brassicales; Brassicaceae; Camelineae; Arabidopsis	2.27051	2.35806	1.11316	0.600487	0.38745	0.523856	-6.40058	-6.07538	-7.80657	1.62372	1.53884	1.20012	-0.461828	2.0229	1.84145	2.49632	2.76748
1	Ntome_NODE_10370_length_2149_cov_124	.	1.41374	1.29771	-0.116528	1.32746	0.5201	0.236307	-4.28725	-4.28725	-4.28725	1.06924	0.579159	0.519585	1.1279	0.746609	1.06995	1.05402	2.01653
1	Ntome_NODE_10371_length_2149_cov_96	.	0.996944	1.30728	0.87665	-0.476987	0.523013	-0.18748	-2.64691	-2.64691	-3.64691	1.05353	0.160443	-0.476987	0.601016	1.25998	0.160443	1.39748	1.74541
1	Ntome_NODE_10372_length_2149_cov_92	ASCC1_MOUSE^ASCC1_MOUSE^Q:424-5,H:165-305^30.07%ID^E:1.98e-13^RecName: Full=Activating signal cointegrator 1 complex subunit 1;^Eukaryota; Metazoa; Chordata; Craniata; Vertebrata; Euteleostomi; Mammalia; Eutheria; Euarchontoglires; Glires; Rodentia; Myomorpha; Muroidea; Muridae; Murinae; Mus; Mus	1.39835	0.935167	-0.236782	-0.48266	0.355051	0.466739	-2.77393	-4.80603	-4.80603	0.721916	1.18696	0.715649	1.34656	0.683577	0.663856	1.96783	2.66377
1	Ntome_NODE_10373_length_2149_cov_65	RER3_ARATH^RER3_ARATH^Q:1063-1701,H:118-332^74.884%ID^E:1.76e-109^RecName: Full=Protein RETICULATA-RELATED 3, chloroplastic {ECO:0000303|PubMed:23596191};^Eukaryota; Viridiplantae; Streptophyta; Embryophyta; Tracheophyta; Spermatophyta; Magnoliopsida; eudicotyledons; Gunneridae; Pentapetalae; rosids; malvids; Brassicales; Brassicaceae; Camelineae; Arabidopsis	0.979703	1.12917	0.742098	0.0777934	0.275943	-0.16429	-4.90953	-2.87743	-3.8739	1.05649	0.408789	0.940972	1.00192	1.20359	1.11284	1.46551	1.43032
1	Ntome_NODE_10375_length_2149_cov_34	PP160_ARATH^PP160_ARATH^Q:1896-112,H:40-626^59.16%ID^E:0^RecName: Full=Pentatricopeptide repeat-containing protein At2g17525, mitochondrial;^Eukaryota; Viridiplantae; Streptophyta; Embryophyta; Tracheophyta; Spermatophyta; Magnoliopsida; eudicotyledons; Gunneridae; Pentapetalae; rosids; malvids; Brassicales; Brassicaceae; Camelineae; Arabidopsis	1.4315	1.5364	0.591057	0.200663	-0.0803913	-0.181953	-4.31535	-2.62829	-2.70182	0.555998	0.500223	0.469675	-0.31806	0.771686	0.166205	1.94731	2.05516
1	Ntome_NODE_10376_length_2147_cov_285	.	2.10473	2.18701	0.869464	1.0372	0.693707	0.244713	-4.05096	-6.33784	-6.33784	1.45943	0.482464	0.926881	1.06338	1.06193	0.244563	1.98859	2.3626
1	Ntome_NODE_10377_length_2148_cov_281	AT13A_ARATH^AT13A_ARATH^Q:1995-256,H:1-575^48.739%ID^E:3.31e-106^RecName: Full=Autophagy-related protein 13a {ECO:0000303|PubMed:12114572};^Eukaryota; Viridiplantae; Streptophyta; Embryophyta; Tracheophyta; Spermatophyta; Magnoliopsida; eudicotyledons; Gunneridae; Pentapetalae; rosids; malvids; Brassicales; Brassicaceae; Camelineae; Arabidopsis	0.565253	1.13403	-0.133825	0.821434	0.671893	0.834435	-5.51199	-5.51199	-5.51199	1.45472	0.539164	0.83408	1.6714	1.63287	1.2823	2.40335	2.82487
1	Ntome_NODE_10378_length_2148_cov_268	MLN51_ARATH^MLN51_ARATH^Q:2148-589,H:156-603^33.647%ID^E:3.99e-42^RecName: Full=Protein MLN51 homolog;^Eukaryota; Viridiplantae; Streptophyta; Embryophyta; Tracheophyta; Spermatophyta; Magnoliopsida; eudicotyledons; Gunneridae; Pentapetalae; rosids; malvids; Brassicales; Brassicaceae; Camelineae; Arabidopsis	2.07858	1.88788	0.238604	0.572977	0.892254	0.0428238	-6.8991	-4.76488	-6.8991	1.42458	1.2482	1.02208	1.38148	1.64033	1.43481	2.63152	2.06697
1	Ntome_NODE_10379_length_2148_cov_257	DA1_ARATH^DA1_ARATH^Q:1747-248,H:1-531^62.406%ID^E:0^RecName: Full=Protein DA1;^Eukaryota; Viridiplantae; Streptophyta; Embryophyta; Tracheophyta; Spermatophyta; Magnoliopsida; eudicotyledons; Gunneridae; Pentapetalae; rosids; malvids; Brassicales; Brassicaceae; Camelineae; Arabidopsis	1.06314	1.21694	-0.266871	-0.162731	-0.130653	-0.0766305	-3.93304	-2.68827	-3.66722	0.848534	0.502263	0.321668	1.14148	0.728977	0.92469	2.08542	2.0923
1	Ntome_NODE_1038_length_5031_cov_236	AGD8_ARATH^AGD8_ARATH^Q:3500-4705,H:5-413^67.073%ID^E:9.04e-166^RecName: Full=Probable ADP-ribosylation factor GTPase-activating protein AGD8;^Eukaryota; Viridiplantae; Streptophyta; Embryophyta; Tracheophyta; Spermatophyta; Magnoliopsida; eudicotyledons; Gunneridae; Pentapetalae; rosids; malvids; Brassicales; Brassicaceae; Camelineae; Arabidopsis	2.11844	1.84412	0.752341	0.924059	1.06169	1.07623	-8.2923	-6.16137	-5.42045	1.13204	0.933752	0.80265	1.71844	0.946846	0.82825	2.59645	3.13882
1	Ntome_NODE_10380_length_2148_cov_187	.	1.362	1.10485	0.956748	0.270857	-0.252705	1.33226	-4.25271	-4.25271	-4.25271	1.33226	0.654185	0.0692228	1.44773	1.38942	-0.930777	1.33226	2.68981
1	Ntome_NODE_10381_length_2148_cov_171	AI5L5_ARATH^AI5L5_ARATH^Q:549-1826,H:6-416^53.084%ID^E:3.76e-93^RecName: Full=ABSCISIC ACID-INSENSITIVE 5-like protein 5;^Eukaryota; Viridiplantae; Streptophyta; Embryophyta; Tracheophyta; Spermatophyta; Magnoliopsida; eudicotyledons; Gunneridae; Pentapetalae; rosids; malvids; Brassicales; Brassicaceae; Camelineae; Arabidopsis	1.34214	0.155904	-0.132947	0.342138	-0.496548	-0.495517	-4.30287	-4.30287	-4.30287	0.922095	0.851744	1.17772	1.84077	0.477963	0.785015	3.76859	2.36955
1	Ntome_NODE_10385_length_2147_cov_242	SQD2_ARATH^SQD2_ARATH^Q:1541-321,H:101-507^81.081%ID^E:0^RecName: Full=Sulfoquinovosyl transferase SQD2 {ECO:0000303|PubMed:11960029};^Eukaryota; Viridiplantae; Streptophyta; Embryophyta; Tracheophyta; Spermatophyta; Magnoliopsida; eudicotyledons; Gunneridae; Pentapetalae; rosids; malvids; Brassicales; Brassicaceae; Camelineae; Arabidopsis	1.23118	1.12882	-0.289767	-0.0146637	-0.981364	-0.600354	-3.40646	-2.20559	-2.7792	0.866237	0.97804	0.475923	1.16176	0.969446	0.832883	0.851597	1.78151
1	Ntome_NODE_10386_length_2147_cov_205	ITPK1_MAIZE^ITPK1_MAIZE^Q:1855-899,H:18-335^59.375%ID^E:7.55e-132^RecName: Full=Inositol-tetrakisphosphate 1-kinase 1;^Eukaryota; Viridiplantae; Streptophyta; Embryophyta; Tracheophyta; Spermatophyta; Magnoliopsida; Liliopsida; Poales; Poaceae; PACMAD clade; Panicoideae; Andropogonodae; Andropogoneae; Tripsacinae; Zea	2.7264	2.88507	1.1789	0.369992	0.573513	0.671503	-5.62459	-5.62459	-5.62459	0.933374	0.159654	0.627699	0.337036	0.983482	0.76773	2.28164	2.37778
1	Ntome_NODE_10387_length_2147_cov_145	RGAP3_ARATH^RGAP3_ARATH^Q:578-1768,H:74-447^58.128%ID^E:2.24e-146^RecName: Full=Rho GTPase-activating protein 3;^Eukaryota; Viridiplantae; Streptophyta; Embryophyta; Tracheophyta; Spermatophyta; Magnoliopsida; eudicotyledons; Gunneridae; Pentapetalae; rosids; malvids; Brassicales; Brassicaceae; Camelineae; Arabidopsis	0.147423	0.289235	-1.39955	0.219725	-0.320352	0.265584	-0.690088	-1.49506	-2.69766	0.659742	0.260099	-0.532856	1.30267	0.844939	1.00063	0.44631	1.69921
1	Ntome_NODE_10388_length_2147_cov_99	.	0.273499	0.490945	-0.304205	0.293374	-0.349249	0.788678	-4.29878	-3.2773	-4.29878	1.1305	0.608587	1.28046	1.48467	0.858259	0.478372	2.17549	2.6655
1	Ntome_NODE_10389_length_2147_cov_56	SCAM4_ARATH^SCAM4_ARATH^Q:1761-2147,H:23-143^62.791%ID^E:3.49e-49^RecName: Full=Secretory carrier-associated membrane protein 4;^Eukaryota; Viridiplantae; Streptophyta; Embryophyta; Tracheophyta; Spermatophyta; Magnoliopsida; eudicotyledons; Gunneridae; Pentapetalae; rosids; malvids; Brassicales; Brassicaceae; Camelineae; Arabidopsis	1.65856	1.44778	1.43295	0.815926	0.12169	1.23711	-5.206	-3.60193	-5.206	0.391236	0.0525214	-0.619833	1.20492	0.881041	0.143439	2.39421	2.85237
1	Ntome_NODE_1039_length_5030_cov_156	.	-0.310263	0.0755439	-0.912876	0.131912	0.270194	0.46051	-2.58359	-2.03436	-2.852	1.01402	0.649665	0.376151	0.74922	0.653308	0.149624	1.77247	2.39047
1	Ntome_NODE_10390_length_2146_cov_266	GSHB_SOLLC^GSHB_SOLLC^Q:166-1767,H:16-546^87.151%ID^E:0^RecName: Full=Glutathione synthetase, chloroplastic;^Eukaryota; Viridiplantae; Streptophyta; Embryophyta; Tracheophyta; Spermatophyta; Magnoliopsida; eudicotyledons; Gunneridae; Pentapetalae; asterids; lamiids; Solanales; Solanaceae; Solanoideae; Solaneae; Solanum; Lycopersicon	0.358849	0.32611	-1.22494	0.177853	-0.552446	0.150353	-2.55176	-3.36647	-2.57029	1.1761	0.754741	0.385708	1.40568	1.23222	0.680868	1.40252	2.21489
1	Ntome_NODE_10391_length_2146_cov_265	NTF2_ARATH^NTF2_ARATH^Q:1858-806,H:19-370^46.175%ID^E:1.85e-71^RecName: Full=Nuclear transport factor 2 {ECO:0000303|PubMed:28229965};^Eukaryota; Viridiplantae; Streptophyta; Embryophyta; Tracheophyta; Spermatophyta; Magnoliopsida; eudicotyledons; Gunneridae; Pentapetalae; rosids; malvids; Brassicales; Brassicaceae; Camelineae; Arabidopsis	2.25005	1.99441	0.270284	0.885394	0.686968	-0.242927	-7.26973	-5.0525	-4.68717	1.07132	1.21038	0.680508	1.28865	1.22345	0.813486	2.39561	2.48182
1	Ntome_NODE_10392_length_2146_cov_263	OBE2_ARATH^OBE2_ARATH^Q:1873-239,H:13-562^63.243%ID^E:0^RecName: Full=Protein OBERON 2 {ECO:0000303|PubMed:18403411};^Eukaryota; Viridiplantae; Streptophyta; Embryophyta; Tracheophyta; Spermatophyta; Magnoliopsida; eudicotyledons; Gunneridae; Pentapetalae; rosids; malvids; Brassicales; Brassicaceae; Camelineae; Arabidopsis	1.81012	1.78158	0.370207	0.660167	0.153275	0.784785	-6.40958	-5.40238	-6.40958	1.21145	1.05884	0.795384	1.81717	1.56093	1.03444	2.35197	2.83121
1	Ntome_NODE_10393_length_2148_cov_244	SEI2_ARATH^SEI2_ARATH^Q:1515-199,H:79-521^42.544%ID^E:4.24e-103^RecName: Full=Seipin-2 {ECO:0000303|PubMed:26362606};^Eukaryota; Viridiplantae; Streptophyta; Embryophyta; Tracheophyta; Spermatophyta; Magnoliopsida; eudicotyledons; Gunneridae; Pentapetalae; rosids; malvids; Brassicales; Brassicaceae; Camelineae; Arabidopsis	1.43779	0.888068	0.624293	0.238687	0.183451	0.524035	-3.8145	-3.46015	-3.33142	0.484605	0.37813	0.673981	0.714488	0.46226	0.319811	2.06341	1.61305
1	Ntome_NODE_10396_length_2146_cov_30	.	0.752497	0.811132	-0.0997417	-0.895509	-0.632474	0.241995	-3.21744	-0.632474	-2.21744	0.720849	0.760759	-0.1131	0.308632	0.741406	0.00598583	0.904408	2.56051
1	Ntome_NODE_10398_length_2145_cov_233	ESL1_ARATH^ESL1_ARATH^Q:527-1015,H:7-168^48.466%ID^E:5.76e-46^RecName: Full=Sugar transporter ESL1 {ECO:0000303|PubMed:19901034};^Eukaryota; Viridiplantae; Streptophyta; Embryophyta; Tracheophyta; Spermatophyta; Magnoliopsida; eudicotyledons; Gunneridae; Pentapetalae; rosids; malvids; Brassicales; Brassicaceae; Camelineae; Arabidopsis`ESL1_ARATH^ESL1_ARATH^Q:1248-1331,H:184-211^53.571%ID^E:5.76e-…	0.0173773	0.536101	-2.07387	-0.491055	0.18621	0.130003	-3.21589	-4.23737	-4.23737	0.873246	1.03466	1.22174	0.727955	1.88116	1.56224	3.06202	3.02285
1	Ntome_NODE_10399_length_2145_cov_229	RNF5_HUMAN^RNF5_HUMAN^Q:660-905,H:25-102^42.683%ID^E:7.89e-16^RecName: Full=E3 ubiquitin-protein ligase RNF5;^Eukaryota; Metazoa; Chordata; Craniata; Vertebrata; Euteleostomi; Mammalia; Eutheria; Euarchontoglires; Primates; Haplorrhini; Catarrhini; Hominidae; Homo	1.20909	0.531621	0.327616	0.108472	-0.793057	0.39485	-4.43892	-3.80457	-5.44612	1.08682	1.43236	1.06595	1.95894	1.35129	1.24444	1.7827	1.98851
1	Ntome_NODE_104_length_8461_cov_276	C76B6_CATRO^C76B6_CATRO^Q:6273-7760,H:1-493^66.935%ID^E:0^RecName: Full=Geraniol 8-hydroxylase;^Eukaryota; Viridiplantae; Streptophyta; Embryophyta; Tracheophyta; Spermatophyta; Magnoliopsida; eudicotyledons; Gunneridae; Pentapetalae; asterids; lamiids; Gentianales; Apocynaceae; Rauvolfioideae; Vinceae; Catharanthinae; Catharanthus	1.3413	1.14517	-0.351389	-0.326483	-0.392961	-0.12616	-2.56086	-1.88279	-2.30285	0.771413	-0.00144863	0.0863041	0.711062	0.805254	0.371769	0.983129	1.72953
1	Ntome_NODE_1040_length_5029_cov_203	.	0.561054	0.16242	-0.846216	-0.141174	-0.375183	-0.361049	-2.55541	-1.58144	-2.76963	0.816156	0.800718	0.369445	1.11588	0.98583	0.26707	1.45522	2.09631
1	Ntome_NODE_10400_length_2145_cov_209	PPIL2_ARATH^PPIL2_ARATH^Q:63-1796,H:18-595^75.643%ID^E:0^RecName: Full=Peptidyl-prolyl cis-trans isomerase CYP65 {ECO:0000305};^Eukaryota; Viridiplantae; Streptophyta; Embryophyta; Tracheophyta; Spermatophyta; Magnoliopsida; eudicotyledons; Gunneridae; Pentapetalae; rosids; malvids; Brassicales; Brassicaceae; Camelineae; Arabidopsis	1.44701	0.712054	0.0315821	0.243174	-0.809057	0.484505	-3.05481	-2.61972	-3.1841	0.7701	-0.00518268	0.29633	1.11465	0.263813	0.53358	1.55115	2.22491
1	Ntome_NODE_10401_length_2145_cov_121	PP161_ARATH^PP161_ARATH^Q:1839-595,H:48-462^59.856%ID^E:0^RecName: Full=Pentatricopeptide repeat-containing protein At2g17670;^Eukaryota; Viridiplantae; Streptophyta; Embryophyta; Tracheophyta; Spermatophyta; Magnoliopsida; eudicotyledons; Gunneridae; Pentapetalae; rosids; malvids; Brassicales; Brassicaceae; Camelineae; Arabidopsis	2.26479	1.83953	0.467752	0.408843	0.0970506	-0.268829	-5.76068	-4.76068	-5.76068	1.10968	1.39424	1.03373	1.69547	1.07991	0.778632	2.37374	2.0075
1	Ntome_NODE_10402_length_2145_cov_77	.	1.4467	0.714892	-0.507501	0.229465	-0.700146	-0.138267	-2.77054	-4.09246	-4.09246	0.688896	1.05728	0.994999	1.4467	1.03682	1.31693	1.07746	2.29124
1	Ntome_NODE_10403_length_2145_cov_61	PP338_ARATH^PP338_ARATH^Q:1895-453,H:40-520^64.033%ID^E:0^RecName: Full=Pentatricopeptide repeat-containing protein At4g26680, mitochondrial;^Eukaryota; Viridiplantae; Streptophyta; Embryophyta; Tracheophyta; Spermatophyta; Magnoliopsida; eudicotyledons; Gunneridae; Pentapetalae; rosids; malvids; Brassicales; Brassicaceae; Camelineae; Arabidopsis	0.833116	1.38115	1.02527	0.0414952	-0.240859	0.711905	-4.04512	-4.04512	-4.04512	1.12561	0.389843	0.553008	1.38115	0.880406	-0.237764	1.73624	2.55479
1	Ntome_NODE_10404_length_2144_cov_297	AZG1_ARATH^AZG1_ARATH^Q:1979-372,H:23-557^78.172%ID^E:0^RecName: Full=Adenine/guanine permease AZG1;^Eukaryota; Viridiplantae; Streptophyta; Embryophyta; Tracheophyta; Spermatophyta; Magnoliopsida; eudicotyledons; Gunneridae; Pentapetalae; rosids; malvids; Brassicales; Brassicaceae; Camelineae; Arabidopsis	0.270755	0.501919	-0.361062	0.964015	0.74201	0.51604	-3.39096	-3.26763	-3.7813	0.442815	0.0305375	-0.277451	1.59049	0.966474	0.917114	2.28561	1.85062
1	Ntome_NODE_10405_length_2144_cov_273	ADT2_SOLTU^ADT2_SOLTU^Q:158-1309,H:1-385^93.766%ID^E:0^RecName: Full=ADP,ATP carrier protein, mitochondrial;^Eukaryota; Viridiplantae; Streptophyta; Embryophyta; Tracheophyta; Spermatophyta; Magnoliopsida; eudicotyledons; Gunneridae; Pentapetalae; asterids; lamiids; Solanales; Solanaceae; Solanoideae; Solaneae; Solanum	2.14252	2.16127	0.314243	0.731797	0.537646	0.580842	-5.23145	-5.77411	-5.76773	1.40556	1.00895	0.47344	1.23624	1.2348	0.671579	2.03048	2.24393
1	Ntome_NODE_10406_length_2144_cov_270	MINP1_DICDI^MINP1_DICDI^Q:366-1580,H:103-539^27.093%ID^E:5.93e-39^RecName: Full=Multiple inositol polyphosphate phosphatase 1;^Eukaryota; Amoebozoa; Mycetozoa; Dictyostelids; Dictyosteliales; Dictyosteliaceae; Dictyostelium	2.50926	2.27355	0.19285	0.93681	0.314226	0.43622	-6.30093	-5.11189	-6.30093	0.998466	0.775783	0.981792	1.56864	1.19053	1.03053	1.93269	2.5724
1	Ntome_NODE_10408_length_2135_cov_253	TEX10_HUMAN^TEX10_HUMAN^Q:1984-1424,H:7-190^31.016%ID^E:1.67e-15^RecName: Full=Testis-expressed protein 10;^Eukaryota; Metazoa; Chordata; Craniata; Vertebrata; Euteleostomi; Mammalia; Eutheria; Euarchontoglires; Primates; Haplorrhini; Catarrhini; Hominidae; Homo	1.78933	1.24105	0.126989	-0.21926	-0.136913	0.433443	-4.60745	-3.28552	-4.60745	1.29968	0.782805	0.289306	1.25028	1.2191	-0.175158	1.57881	3.02096
1	Ntome_NODE_10409_length_2144_cov_229	UFOG_PETHY^UFOG_PETHY^Q:1619-198,H:2-473^87.975%ID^E:0^RecName: Full=Anthocyanidin-3-O-glucoside rhamnosyltransferase {ECO:0000303|PubMed:8130800};^Eukaryota; Viridiplantae; Streptophyta; Embryophyta; Tracheophyta; Spermatophyta; Magnoliopsida; eudicotyledons; Gunneridae; Pentapetalae; asterids; lamiids; Solanales; Solanaceae; Petunioideae; Petunia	0.801949	0.400204	-0.321634	1.23478	0.259513	0.969871	-5.6865	-4.44152	-6.00947	1.04264	1.03424	0.926442	2.45095	1.48285	1.18096	2.46473	2.20999
1	Ntome_NODE_1041_length_5029_cov_172	U2A2B_NICPL^U2A2B_NICPL^Q:3098-4234,H:195-573^96.57%ID^E:0^RecName: Full=Splicing factor U2af large subunit B;^Eukaryota; Viridiplantae; Streptophyta; Embryophyta; Tracheophyta; Spermatophyta; Magnoliopsida; eudicotyledons; Gunneridae; Pentapetalae; asterids; lamiids; Solanales; Solanaceae; Nicotianoideae; Nicotianeae; Nicotiana	1.29904	0.816658	0.786568	0.0198372	-0.946742	-0.244011	-4.12414	-2.77991	-3.30846	0.581564	0.0179293	0.413232	1.09952	0.293846	0.550225	2.44543	3.07941
1	Ntome_NODE_10410_length_2144_cov_228	CDF3_ARATH^CDF3_ARATH^Q:1638-505,H:70-447^45.113%ID^E:4.32e-76^RecName: Full=Cyclic dof factor 3;^Eukaryota; Viridiplantae; Streptophyta; Embryophyta; Tracheophyta; Spermatophyta; Magnoliopsida; eudicotyledons; Gunneridae; Pentapetalae; rosids; malvids; Brassicales; Brassicaceae; Camelineae; Arabidopsis	1.5551	0.859451	-0.365736	0.781106	0.219227	0.470765	-3.17309	-4.17309	-2.17309	-0.588128	-0.472651	0.286341	1.11231	1.21923	1.60853	0.68489	2.14884
1	Ntome_NODE_10411_length_2144_cov_186	G2OX1_PEA^G2OX1_PEA^Q:175-933,H:1-246^66.008%ID^E:3.21e-115^RecName: Full=Gibberellin 2-beta-dioxygenase 1;^Eukaryota; Viridiplantae; Streptophyta; Embryophyta; Tracheophyta; Spermatophyta; Magnoliopsida; eudicotyledons; Gunneridae; Pentapetalae; rosids; fabids; Fabales; Fabaceae; Papilionoideae; 50 kb inversion clade; NPAAA clade; Hologalegina; IRL clade; Fabeae; Pisum`G2OX1_PEA^G2OX1_PEA^Q:1619…	1.03249	1.01488	1.43004	-1.23812	-0.731649	-0.310468	-4.81826	-4.81826	-4.81826	0.829627	0.622025	0.12519	2.61211	1.19117	1.85769	3.2474	2.7724
1	Ntome_NODE_10412_length_2144_cov_179	SSY3_SOLTU^SSY3_SOLTU^Q:1082-393,H:1001-1230^96.087%ID^E:7.83e-150^RecName: Full=Soluble starch synthase 3, chloroplastic/amyloplastic;^Eukaryota; Viridiplantae; Streptophyta; Embryophyta; Tracheophyta; Spermatophyta; Magnoliopsida; eudicotyledons; Gunneridae; Pentapetalae; asterids; lamiids; Solanales; Solanaceae; Solanoideae; Solaneae; Solanum`SSY3_SOLTU^SSY3_SOLTU^Q:2142-1960,H:943-1003^93.443…	1.79147	1.86917	0.151145	0.409428	0.311487	0.665079	-3.72216	-5.48345	-5.48345	0.720731	0.249363	0.353233	1.32055	1.04481	0.504327	2.20508	3.09319
1	Ntome_NODE_10413_length_2144_cov_173	KTNA1_ARATH^KTNA1_ARATH^Q:903-1856,H:203-522^73.75%ID^E:3.71e-169^RecName: Full=Katanin p60 ATPase-containing subunit A1 {ECO:0000255|HAMAP-Rule:MF_03023};^Eukaryota; Viridiplantae; Streptophyta; Embryophyta; Tracheophyta; Spermatophyta; Magnoliopsida; eudicotyledons; Gunneridae; Pentapetalae; rosids; malvids; Brassicales; Brassicaceae; Camelineae; Arabidopsis	1.71476	1.61516	-0.303732	0.298846	0.107934	0.0458614	-2.93041	-4.65069	-4.50664	0.686309	0.61009	0.299079	1.13852	1.02484	0.321085	1.99237	2.53661
1	Ntome_NODE_10414_length_2144_cov_155	PITC_DICDI^PITC_DICDI^Q:1674-1174,H:78-245^30.357%ID^E:6.94e-15^RecName: Full=Phosphatidylinositol transfer protein 3;^Eukaryota; Amoebozoa; Mycetozoa; Dictyostelids; Dictyosteliales; Dictyosteliaceae; Dictyostelium	0.832211	1.06276	0.122976	0.344266	0.109715	1.00785	-8.18111	-6.25587	-7.91807	1.90687	1.79695	1.79824	3.50019	2.62618	2.71207	1.89111	2.64365
1	Ntome_NODE_10415_length_2144_cov_43	.	0.785758	0.510124	0.721628	-0.0373639	-0.567879	-0.0373639	-3.7378	-3.7378	-3.7378	0.721628	0.654514	-0.415876	1.75405	1.75405	0.262196	2.80136	2.30659
1	Ntome_NODE_10416_length_2143_cov_317	.	2.25086	2.14	0.548366	0.940289	0.831904	0.4406	-6.91246	-6.91246	-6.91246	1.53916	1.35466	1.12657	1.76667	1.66576	1.36506	2.14745	2.62001
1	Ntome_NODE_10418_length_2143_cov_231	GAUTA_ARATH^GAUTA_ARATH^Q:1849-248,H:1-536^79.143%ID^E:0^RecName: Full=Probable galacturonosyltransferase 10;^Eukaryota; Viridiplantae; Streptophyta; Embryophyta; Tracheophyta; Spermatophyta; Magnoliopsida; eudicotyledons; Gunneridae; Pentapetalae; rosids; malvids; Brassicales; Brassicaceae; Camelineae; Arabidopsis	1.87408	1.45648	0.661092	0.750718	0.39409	1.2114	-5.25812	-4.95327	-6.70173	1.36447	0.752036	0.977892	0.867443	1.28428	0.635179	1.66459	3.01937
1	Ntome_NODE_10419_length_2143_cov_206	BH062_ARATH^BH062_ARATH^Q:309-1808,H:1-456^41.744%ID^E:2.1e-84^RecName: Full=Transcription factor bHLH62;^Eukaryota; Viridiplantae; Streptophyta; Embryophyta; Tracheophyta; Spermatophyta; Magnoliopsida; eudicotyledons; Gunneridae; Pentapetalae; rosids; malvids; Brassicales; Brassicaceae; Camelineae; Arabidopsis	1.91942	2.30304	1.31413	0.938095	0.946906	1.37393	-8.19507	-5.19147	-7.19507	1.34538	1.68995	0.875236	1.76339	1.44559	0.228589	2.13132	2.30663
1	Ntome_NODE_1042_length_5029_cov_119	PATA3_SOLTU^PATA3_SOLTU^Q:4863-3697,H:1-386^62.245%ID^E:3.28e-163^RecName: Full=Patatin group A-3;^Eukaryota; Viridiplantae; Streptophyta; Embryophyta; Tracheophyta; Spermatophyta; Magnoliopsida; eudicotyledons; Gunneridae; Pentapetalae; asterids; lamiids; Solanales; Solanaceae; Solanoideae; Solaneae; Solanum	1.25577	0.906761	1.04239	0.277617	0.0384877	-0.217873	-4.31018	-3.26289	-4.01046	0.388538	0.61086	0.368649	0.836346	0.123695	0.142039	2.58675	3.2235
1	Ntome_NODE_10420_length_2143_cov_106	.	0.155959	4.30631	0.766013	-0.72113	3.05369	-2.29651	-3.89106	-3.89106	-3.89106	4.99424	-1.0837	-0.692561	-1.52648	-0.72113	2.15988	2.58468	0.693907
1	Ntome_NODE_10421_length_2143_cov_74	ASF1A_ARATH^ASF1A_ARATH^Q:916-1443,H:1-176^79.545%ID^E:1.63e-93^RecName: Full=Probable histone chaperone ASF1A;^Eukaryota; Viridiplantae; Streptophyta; Embryophyta; Tracheophyta; Spermatophyta; Magnoliopsida; eudicotyledons; Gunneridae; Pentapetalae; rosids; malvids; Brassicales; Brassicaceae; Camelineae; Arabidopsis	1.00753	1.09923	0.0712288	0.265131	0.232929	0.485068	-3.92973	-3.89936	-4.84046	0.677443	1.14435	-0.183966	1.29602	2.7886	2.55263	0.446788	0.78656
1	Ntome_NODE_10422_length_2143_cov_67	BH110_ARATH^BH110_ARATH^Q:756-1703,H:94-453^41.622%ID^E:7.8e-59^RecName: Full=Transcription factor bHLH110;^Eukaryota; Viridiplantae; Streptophyta; Embryophyta; Tracheophyta; Spermatophyta; Magnoliopsida; eudicotyledons; Gunneridae; Pentapetalae; rosids; malvids; Brassicales; Brassicaceae; Camelineae; Arabidopsis	1.04045	1.14541	1.85021	-0.810498	0.610845	0.742132	-3.43089	-4.28688	-4.28688	1.09094	1.55811	0.866926	0.712219	0.505976	-1.11856	1.75751	2.05297
1	Ntome_NODE_10426_length_2142_cov_299	.	1.10817	1.51153	-0.47679	0.153977	-0.0386684	-0.730546	-5.43099	-5.43099	-5.43099	1.35037	0.401904	1.70857	2.16147	1.64583	2.14644	2.82168	2.52902
1	Ntome_NODE_10427_length_2142_cov_278	GPT1_ARATH^GPT1_ARATH^Q:1459-392,H:39-387^78.729%ID^E:5.19e-171^RecName: Full=Glucose-6-phosphate/phosphate translocator 1, chloroplastic;^Eukaryota; Viridiplantae; Streptophyta; Embryophyta; Tracheophyta; Spermatophyta; Magnoliopsida; eudicotyledons; Gunneridae; Pentapetalae; rosids; malvids; Brassicales; Brassicaceae; Camelineae; Arabidopsis	2.26211	2.22323	1.84931	1.24431	1.08555	1.32953	-6.05338	-7.47227	-9.37531	1.46724	1.57536	1.07522	1.93694	1.56118	1.39439	1.89778	1.99882
1	Ntome_NODE_10428_length_2142_cov_208	FLZ8_ARATH^FLZ8_ARATH^Q:177-1043,H:1-243^41.379%ID^E:3.47e-37^RecName: Full=FCS-Like Zinc finger 8 {ECO:0000303|PubMed:24901469};^Eukaryota; Viridiplantae; Streptophyta; Embryophyta; Tracheophyta; Spermatophyta; Magnoliopsida; eudicotyledons; Gunneridae; Pentapetalae; rosids; malvids; Brassicales; Brassicaceae; Camelineae; Arabidopsis	1.67609	1.53644	1.75354	0.78463	0.981461	1.4032	-6.14823	-5.12675	-6.14823	1.33478	1.0748	0.973817	1.09827	0.530542	0.310869	1.65027	2.31451
1	Ntome_NODE_10429_length_2142_cov_205	BRG1_ARATH^BRG1_ARATH^Q:592-386,H:220-292^45.205%ID^E:2.99e-08^RecName: Full=BOI-related E3 ubiquitin-protein ligase 1;^Eukaryota; Viridiplantae; Streptophyta; Embryophyta; Tracheophyta; Spermatophyta; Magnoliopsida; eudicotyledons; Gunneridae; Pentapetalae; rosids; malvids; Brassicales; Brassicaceae; Camelineae; Arabidopsis	1.6471	1.68248	1.14351	0.684723	0.210925	0.522349	-5.31385	-4.10857	-3.95323	1.46087	0.794061	-0.336352	1.55387	1.1031	0.989749	0.833326	1.08595
1	Ntome_NODE_1043_length_5028_cov_252	MPK9_ARATH^MPK9_ARATH^Q:2613-4151,H:1-510^80.851%ID^E:0^RecName: Full=Mitogen-activated protein kinase 9;^Eukaryota; Viridiplantae; Streptophyta; Embryophyta; Tracheophyta; Spermatophyta; Magnoliopsida; eudicotyledons; Gunneridae; Pentapetalae; rosids; malvids; Brassicales; Brassicaceae; Camelineae; Arabidopsis	1.85569	1.58594	0.476451	0.47665	0.366052	0.352862	-4.15776	-4.47189	-4.70576	1.05036	0.899519	0.542331	0.186219	1.02471	0.718746	1.80407	1.99581
1	Ntome_NODE_10431_length_2142_cov_126	DRP1C_ARATH^DRP1C_ARATH^Q:2095-515,H:88-614^84.44%ID^E:0^RecName: Full=Dynamin-related protein 1C;^Eukaryota; Viridiplantae; Streptophyta; Embryophyta; Tracheophyta; Spermatophyta; Magnoliopsida; eudicotyledons; Gunneridae; Pentapetalae; rosids; malvids; Brassicales; Brassicaceae; Camelineae; Arabidopsis	-0.157398	0.181106	-1.00539	-0.157398	-0.327323	-0.39375	-3.32732	-3.32732	-3.32732	0.894554	1.36589	0.256437	1.69726	1.14776	0.845005	2.54452	3.0907
1	Ntome_NODE_10432_length_2142_cov_111	BRG1_ARATH^BRG1_ARATH^Q:1159-1770,H:92-292^33.333%ID^E:5.88e-16^RecName: Full=BOI-related E3 ubiquitin-protein ligase 1;^Eukaryota; Viridiplantae; Streptophyta; Embryophyta; Tracheophyta; Spermatophyta; Magnoliopsida; eudicotyledons; Gunneridae; Pentapetalae; rosids; malvids; Brassicales; Brassicaceae; Camelineae; Arabidopsis	2.08804	1.53479	1.4121	0.287442	0.386264	0.965421	-5.98158	-6.98878	-6.98878	1.08772	0.88553	1.38396	2.46225	1.6699	0.970415	2.69773	2.12757
1	Ntome_NODE_10433_length_2142_cov_55	VRN1_ARATH^VRN1_ARATH^Q:1696-1857,H:284-336^40.741%ID^E:1.57e-06^RecName: Full=B3 domain-containing transcription factor VRN1;^Eukaryota; Viridiplantae; Streptophyta; Embryophyta; Tracheophyta; Spermatophyta; Magnoliopsida; eudicotyledons; Gunneridae; Pentapetalae; rosids; malvids; Brassicales; Brassicaceae; Camelineae; Arabidopsis`VRN1_ARATH^VRN1_ARATH^Q:1490-1654,H:216-270^27.273%ID^E:1.57e-06^…	1.88042	1.69147	1.17806	0.329518	0.140706	1.02646	-3.21614	-3.63118	-4.20895	0.692671	0.415253	0.179606	0.564955	-0.40313	-0.629377	2.01094	1.97871
1	Ntome_NODE_10434_length_2141_cov_242	.	1.10688	0.741593	-0.186853	1.12574	1.0684	0.83623	-5.14105	-4.14105	-4.14105	1.14435	-0.333695	1.3508	1.65337	-0.283069	1.51716	2.02888	1.65337
1	Ntome_NODE_10435_length_2141_cov_186	RMXL2_HUMAN^RMXL2_HUMAN^Q:2136-1936,H:19-85^40.299%ID^E:5.46e-06^RecName: Full=RNA-binding motif protein, X-linked-like-2;^Eukaryota; Metazoa; Chordata; Craniata; Vertebrata; Euteleostomi; Mammalia; Eutheria; Euarchontoglires; Primates; Haplorrhini; Catarrhini; Hominidae; Homo	1.96678	1.87689	0.830123	0.425665	-0.273138	-0.529795	-3.67733	-4.54406	-4.38565	1.00682	0.790997	0.555295	1.03645	0.824194	0.270649	2.19839	1.62771
1	Ntome_NODE_10436_length_2141_cov_155	XXT3_ARATH^XXT3_ARATH^Q:1763-432,H:1-448^75.61%ID^E:0^RecName: Full=Probable xyloglucan 6-xylosyltransferase 3 {ECO:0000305};^Eukaryota; Viridiplantae; Streptophyta; Embryophyta; Tracheophyta; Spermatophyta; Magnoliopsida; eudicotyledons; Gunneridae; Pentapetalae; rosids; malvids; Brassicales; Brassicaceae; Camelineae; Arabidopsis	1.04607	1.62951	-0.234342	1.78375	1.25147	1.00687	-6.14387	-6.93464	-6.93464	2.14852	1.34195	0.188444	1.53833	1.56245	1.23438	2.67385	2.84191
1	Ntome_NODE_10439_length_2140_cov_245	.	0.591877	1.31272	0.421952	-0.256119	0.644345	0.61835	-5.16301	-5.16301	-4.16301	1.06581	1.15892	0.591877	1.59188	1.12239	0.966273	2.22931	2.42945
1	Ntome_NODE_1044_length_5028_cov_199	PP6R3_HUMAN^PP6R3_HUMAN^Q:386-1747,H:1-469^32.041%ID^E:1.01e-56^RecName: Full=Serine/threonine-protein phosphatase 6 regulatory subunit 3;^Eukaryota; Metazoa; Chordata; Craniata; Vertebrata; Euteleostomi; Mammalia; Eutheria; Euarchontoglires; Primates; Haplorrhini; Catarrhini; Hominidae; Homo	0.961251	0.984795	-0.228709	0.775077	0.446764	0.804627	-5.80073	-4.74559	-7.42366	1.52313	1.43804	1.3256	2.02742	1.37192	1.15596	2.35216	3.03194
1	Ntome_NODE_10440_length_2140_cov_222	C3H18_ORYSJ^C3H18_ORYSJ^Q:1959-553,H:30-504^56.965%ID^E:8.82e-150^RecName: Full=Zinc finger CCCH domain-containing protein 18;^Eukaryota; Viridiplantae; Streptophyta; Embryophyta; Tracheophyta; Spermatophyta; Magnoliopsida; Liliopsida; Poales; Poaceae; BOP clade; Oryzoideae; Oryzeae; Oryzinae; Oryza; Oryza sativa	1.53019	1.12916	0.29219	-0.425905	-0.712137	0.00642871	-2.3053	-1.276	-2.8141	0.383556	0.170013	-0.0214668	0.653029	0.333337	0.217748	1.43501	1.40426
1	Ntome_NODE_10442_length_2140_cov_107	MA658_ARATH^MA658_ARATH^Q:56-1612,H:44-559^62.308%ID^E:0^RecName: Full=65-kDa microtubule-associated protein 8;^Eukaryota; Viridiplantae; Streptophyta; Embryophyta; Tracheophyta; Spermatophyta; Magnoliopsida; eudicotyledons; Gunneridae; Pentapetalae; rosids; malvids; Brassicales; Brassicaceae; Camelineae; Arabidopsis	-0.414523	-0.21588	-0.809827	-0.482772	0.225761	1.11551	-4.44979	-3.90052	-5.42601	2.00042	1.82168	1.97228	2.31688	1.56756	1.26369	1.76254	1.65298
1	Ntome_NODE_10443_length_2140_cov_105	.	2.12246	1.967	0.703193	0.434539	0.307244	0.942402	-5.99517	-6.09278	-5.85399	1.16498	1.33516	0.807481	1.74061	1.43634	1.00293	1.53687	2.44074
1	Ntome_NODE_10444_length_2139_cov_246	UMPS_TOBAC^UMPS_TOBAC^Q:49-1428,H:4-461^98.696%ID^E:0^RecName: Full=Uridine 5'-monophosphate synthase;^Eukaryota; Viridiplantae; Streptophyta; Embryophyta; Tracheophyta; Spermatophyta; Magnoliopsida; eudicotyledons; Gunneridae; Pentapetalae; asterids; lamiids; Solanales; Solanaceae; Nicotianoideae; Nicotianeae; Nicotiana	1.39374	1.1255	1.47914	1.24591	0.741796	1.74341	-4.8671	-5.32336	-6.37299	0.545876	0.738357	0.512465	0.926404	0.903323	-0.504844	2.32398	3.38838
1	Ntome_NODE_10445_length_2139_cov_214	GCR2_ARATH^GCR2_ARATH^Q:611-1834,H:1-410^64.634%ID^E:0^RecName: Full=LanC-like protein GCR2;^Eukaryota; Viridiplantae; Streptophyta; Embryophyta; Tracheophyta; Spermatophyta; Magnoliopsida; eudicotyledons; Gunneridae; Pentapetalae; rosids; malvids; Brassicales; Brassicaceae; Camelineae; Arabidopsis	2.08202	1.88107	1.04148	0.882422	0.25674	0.596998	-5.03764	-4.84473	-6.73542	0.622764	0.954963	0.643566	1.52294	0.906572	0.549939	1.96411	2.7122
1	Ntome_NODE_10446_length_2139_cov_206	PAE5_ARATH^PAE5_ARATH^Q:56-1318,H:1-427^56.542%ID^E:1.66e-180^RecName: Full=Pectin acetylesterase 5 {ECO:0000303|PubMed:25115560};^Eukaryota; Viridiplantae; Streptophyta; Embryophyta; Tracheophyta; Spermatophyta; Magnoliopsida; eudicotyledons; Gunneridae; Pentapetalae; rosids; malvids; Brassicales; Brassicaceae; Camelineae; Arabidopsis	1.58769	1.34289	-0.321941	0.153648	-0.124478	-0.720215	-4.85328	-1.79782	-3.08088	0.61031	0.421384	0.402322	1.26532	1.42043	0.475164	1.56448	1.65499
1	Ntome_NODE_10447_length_2139_cov_183	.	0.785927	0.96864	1.23664	0.916431	0.625375	1.36168	-7.37551	-5.49319	-6.37551	0.81644	1.43272	0.66193	2.4678	2.26413	1.58042	0.971213	3.15487
1	Ntome_NODE_10448_length_2139_cov_158	MPI1_ARATH^MPI1_ARATH^Q:272-1471,H:27-423^58.105%ID^E:4.57e-173^RecName: Full=Mannose-6-phosphate isomerase 1;^Eukaryota; Viridiplantae; Streptophyta; Embryophyta; Tracheophyta; Spermatophyta; Magnoliopsida; eudicotyledons; Gunneridae; Pentapetalae; rosids; malvids; Brassicales; Brassicaceae; Camelineae; Arabidopsis	1.9824	1.78405	-0.063172	0.310299	0.373566	0.768234	-4.35816	-4.35816	-3.03623	-0.205166	0.974548	1.11563	1.12049	0.486828	0.12791	1.61729	1.35965
1	Ntome_NODE_10449_length_2139_cov_151	RS92_ARATH^RS92_ARATH^Q:1090-1626,H:1-179^90.503%ID^E:1.09e-112^RecName: Full=40S ribosomal protein S9-2;^Eukaryota; Viridiplantae; Streptophyta; Embryophyta; Tracheophyta; Spermatophyta; Magnoliopsida; eudicotyledons; Gunneridae; Pentapetalae; rosids; malvids; Brassicales; Brassicaceae; Camelineae; Arabidopsis	1.55768	1.27819	-0.475638	0.38672	-0.246644	-0.316807	-1.95553	-1.35304	-3.04567	0.387837	0.44124	0.209109	0.296931	0.320775	-0.105086	1.08459	1.53534
1	Ntome_NODE_1045_length_5024_cov_209	KPYC1_ORYSJ^KPYC1_ORYSJ^Q:2001-421,H:1-527^89.184%ID^E:0^RecName: Full=Pyruvate kinase 1, cytosolic {ECO:0000305};^Eukaryota; Viridiplantae; Streptophyta; Embryophyta; Tracheophyta; Spermatophyta; Magnoliopsida; Liliopsida; Poales; Poaceae; BOP clade; Oryzoideae; Oryzeae; Oryzinae; Oryza; Oryza sativa	1.38104	1.43837	-0.508571	0.320612	0.115976	0.392706	-4.82477	-3.74399	-6.10365	1.07108	1.2152	0.980076	1.50481	1.17932	0.944609	2.2311	2.40609
1	Ntome_NODE_10450_length_2139_cov_118	.	0.693165	0.108203	-2.47676	-0.47676	-0.154832	0.845168	-2.47676	-2.47676	-2.47676	1.1082	-0.47676	-2.47676	1.52324	2.27813	1.98267	2.43013	2.52324
1	Ntome_NODE_10451_length_2139_cov_113	.	1.60863	1.5	0.508539	0.725137	0.355588	0.334866	-4.4296	-3.82544	-4.7127	0.815201	1.14323	0.642361	1.18414	0.51668	0.633365	2.04829	0.951715
1	Ntome_NODE_10453_length_2138_cov_296	KIP1_PETIN^KIP1_PETIN^Q:1857-349,H:1-482^70.179%ID^E:0^RecName: Full=Kinase-interacting protein 1 {ECO:0000303|PubMed:11500547};^Eukaryota; Viridiplantae; Streptophyta; Embryophyta; Tracheophyta; Spermatophyta; Magnoliopsida; eudicotyledons; Gunneridae; Pentapetalae; asterids; lamiids; Solanales; Solanaceae; Petunioideae; Petunia`KIP1_PETIN^KIP1_PETIN^Q:351-1,H:562-672^62.393%ID^E:3.23e-31^RecNam…	1.05261	1.03004	0.860186	0.230475	0.307897	0.827324	-2.83648	-5.1584	-3.56864	0.830054	-1.71082	-0.457964	0.987681	0.562422	0.496662	2.76605	3.78091
1	Ntome_NODE_10454_length_2138_cov_197	PCO4_ARATH^PCO4_ARATH^Q:1168-1872,H:5-240^67.782%ID^E:2.21e-110^RecName: Full=Plant cysteine oxidase 4 {ECO:0000303|PubMed:24599061};^Eukaryota; Viridiplantae; Streptophyta; Embryophyta; Tracheophyta; Spermatophyta; Magnoliopsida; eudicotyledons; Gunneridae; Pentapetalae; rosids; malvids; Brassicales; Brassicaceae; Camelineae; Arabidopsis	2.18803	2.29231	0.428025	0.468941	0.375723	0.31985	-4.68497	-5.84847	-5.84847	1.08475	0.731976	0.79134	1.28606	0.837048	1.12686	2.0698	2.38121
1	Ntome_NODE_10455_length_2138_cov_194	ARP9_ORYSI^ARP9_ORYSI^Q:2040-298,H:1-586^61.252%ID^E:0^RecName: Full=Actin-related protein 9;^Eukaryota; Viridiplantae; Streptophyta; Embryophyta; Tracheophyta; Spermatophyta; Magnoliopsida; Liliopsida; Poales; Poaceae; BOP clade; Oryzoideae; Oryzeae; Oryzinae; Oryza; Oryza sativa	1.5472	1.57625	0.495427	0.837216	0.047059	0.925527	-3.21045	-5.16278	-5.16278	0.733972	0.17457	-0.299341	1.83394	-0.00695403	0.432063	1.91403	3.32506
1	Ntome_NODE_10456_length_2138_cov_35	FDL1_ARATH^FDL1_ARATH^Q:1664-2131,H:6-162^37.805%ID^E:4.24e-19^RecName: Full=F-box/FBD/LRR-repeat protein At1g13570;^Eukaryota; Viridiplantae; Streptophyta; Embryophyta; Tracheophyta; Spermatophyta; Magnoliopsida; eudicotyledons; Gunneridae; Pentapetalae; rosids; malvids; Brassicales; Brassicaceae; Camelineae; Arabidopsis	0.737568	-0.37791	-1.37791	0.359056	-0.640944	0.207053	-1.96287	-2.96287	-2.96287	-0.640944	1.20705	1.28278	1.79202	-0.37791	0.737568	1.94402	3.03713
1	Ntome_NODE_10457_length_2137_cov_295	E70B1_ARATH^E70B1_ARATH^Q:273-2111,H:1-618^65.924%ID^E:0^RecName: Full=Exocyst complex component EXO70B1 {ECO:0000303|PubMed:23944713};^Eukaryota; Viridiplantae; Streptophyta; Embryophyta; Tracheophyta; Spermatophyta; Magnoliopsida; eudicotyledons; Gunneridae; Pentapetalae; rosids; malvids; Brassicales; Brassicaceae; Camelineae; Arabidopsis	1.43106	1.78482	0.507432	0.378386	0.662645	0.798414	-7.48171	-7.48171	-5.74619	2.60794	1.16672	1.05792	1.67942	1.4109	1.77589	2.3947	3.05334
1	Ntome_NODE_10458_length_2137_cov_269	GH31_ARATH^GH31_ARATH^Q:1979-195,H:1-589^80.034%ID^E:0^RecName: Full=Probable indole-3-acetic acid-amido synthetase GH3.1;^Eukaryota; Viridiplantae; Streptophyta; Embryophyta; Tracheophyta; Spermatophyta; Magnoliopsida; eudicotyledons; Gunneridae; Pentapetalae; rosids; malvids; Brassicales; Brassicaceae; Camelineae; Arabidopsis	0.117578	0.282378	-0.888189	-1.29363	-0.638539	0.173553	-4.79315	-3.85205	-4.79315	1.40828	0.361461	1.29473	2.71836	2.63076	1.81728	2.9317	2.52263
1	Ntome_NODE_1046_length_5024_cov_176	FB119_ARATH^FB119_ARATH^Q:162-1124,H:15-336^44.242%ID^E:8.38e-74^RecName: Full=F-box protein At2g27310;^Eukaryota; Viridiplantae; Streptophyta; Embryophyta; Tracheophyta; Spermatophyta; Magnoliopsida; eudicotyledons; Gunneridae; Pentapetalae; rosids; malvids; Brassicales; Brassicaceae; Camelineae; Arabidopsis	0.643949	1.34239	0.484524	-0.101194	0.454107	0.403418	-5.83705	-3.44166	-4.75506	1.36363	1.33578	0.742481	1.28146	1.29474	1.15097	1.7212	1.91631
1	Ntome_NODE_10460_length_2137_cov_112	DTX42_ARATH^DTX42_ARATH^Q:732-292,H:366-512^72.789%ID^E:2.15e-42^RecName: Full=Protein DETOXIFICATION 42 {ECO:0000303|PubMed:11739388};^Eukaryota; Viridiplantae; Streptophyta; Embryophyta; Tracheophyta; Spermatophyta; Magnoliopsida; eudicotyledons; Gunneridae; Pentapetalae; rosids; malvids; Brassicales; Brassicaceae; Camelineae; Arabidopsis`DTX42_ARATH^DTX42_ARATH^Q:1516-1349,H:311-366^87.5%ID^E:…	-0.384779	0.654749	-0.554704	-0.392817	-0.480028	-0.467242	-3.5547	-1.96974	-3.5547	0.802848	1.65475	0.654749	0.615221	-0.162387	0.532758	2.86171	3.74432
1	Ntome_NODE_10462_length_2136_cov_284	FB121_ARATH^FB121_ARATH^Q:898-5,H:7-302^56.721%ID^E:1.03e-106^RecName: Full=F-box protein At2g32560;^Eukaryota; Viridiplantae; Streptophyta; Embryophyta; Tracheophyta; Spermatophyta; Magnoliopsida; eudicotyledons; Gunneridae; Pentapetalae; rosids; malvids; Brassicales; Brassicaceae; Camelineae; Arabidopsis	0.825635	0.518285	-0.326349	0.542683	0.217728	0.536303	-3.27832	-4.54436	-3.94504	0.787278	0.440462	0.618741	1.37176	0.64052	0.0782825	2.3981	3.11828
1	Ntome_NODE_10463_length_2136_cov_276	IF5_PHAVU^IF5_PHAVU^Q:475-1788,H:1-436^66.964%ID^E:3.78e-173^RecName: Full=Eukaryotic translation initiation factor 5;^Eukaryota; Viridiplantae; Streptophyta; Embryophyta; Tracheophyta; Spermatophyta; Magnoliopsida; eudicotyledons; Gunneridae; Pentapetalae; rosids; fabids; Fabales; Fabaceae; Papilionoideae; 50 kb inversion clade; NPAAA clade; indigoferoid/millettioid clade; Phaseoleae; Phaseolus	2.01905	1.61546	0.401788	0.539063	0.425001	0.84418	-5.9262	-5.26042	-7.2664	1.01464	0.892927	0.749838	1.48374	1.28364	1.09961	2.81677	3.26732
1	Ntome_NODE_10464_length_2136_cov_263	MTM1_ARATH^MTM1_ARATH^Q:1904-663,H:3-413^64.904%ID^E:1.97e-162^RecName: Full=Mitochondrial carrier protein MTM1;^Eukaryota; Viridiplantae; Streptophyta; Embryophyta; Tracheophyta; Spermatophyta; Magnoliopsida; eudicotyledons; Gunneridae; Pentapetalae; rosids; malvids; Brassicales; Brassicaceae; Camelineae; Arabidopsis	1.00656	1.0557	-1.64318	0.132343	-0.6453	0.0329315	-3.18144	-3.40753	-2.19008	1.24894	0.562834	0.516538	1.28914	0.931291	0.690736	1.25635	2.34416
1	Ntome_NODE_10467_length_2136_cov_191	PTR27_ARATH^PTR27_ARATH^Q:2025-283,H:6-577^76.764%ID^E:0^RecName: Full=Protein NRT1/ PTR FAMILY 6.2;^Eukaryota; Viridiplantae; Streptophyta; Embryophyta; Tracheophyta; Spermatophyta; Magnoliopsida; eudicotyledons; Gunneridae; Pentapetalae; rosids; malvids; Brassicales; Brassicaceae; Camelineae; Arabidopsis	2.79891	2.7868	1.31795	1.50807	1.44944	1.09864	-4.45754	-3.43996	-5.83422	0.241235	-1.72747	-0.801627	-0.192883	0.660807	0.3257	0.863077	3.40308
1	Ntome_NODE_10468_length_2136_cov_162	.	1.32729	1.06019	0.636974	0.386995	-0.652533	1.22194	-4.82246	-4.82246	-4.82246	0.792252	0.177542	0.265005	1.9589	0.569859	0.265005	2.87103	3.58693
1	Ntome_NODE_10469_length_2135_cov_288	BRTL1_ARATH^BRTL1_ARATH^Q:462-1463,H:3-341^67.257%ID^E:9.86e-148^RecName: Full=Probable mitochondrial adenine nucleotide transporter BTL1;^Eukaryota; Viridiplantae; Streptophyta; Embryophyta; Tracheophyta; Spermatophyta; Magnoliopsida; eudicotyledons; Gunneridae; Pentapetalae; rosids; malvids; Brassicales; Brassicaceae; Camelineae; Arabidopsis	0.984322	1.31854	-0.382174	0.623062	0.497076	0.550202	-4.76426	-4.52863	-5.01802	1.66054	0.931607	0.610779	0.700555	0.987435	0.638655	2.50735	2.68296
1	Ntome_NODE_1047_length_5024_cov_132	RP6L3_ARATH^RP6L3_ARATH^Q:4936-2132,H:3-891^59.279%ID^E:0^RecName: Full=Protein RRP6-like 3 {ECO:0000303|PubMed:18285452};^Eukaryota; Viridiplantae; Streptophyta; Embryophyta; Tracheophyta; Spermatophyta; Magnoliopsida; eudicotyledons; Gunneridae; Pentapetalae; rosids; malvids; Brassicales; Brassicaceae; Camelineae; Arabidopsis	2.20731	2.02481	0.445701	1.0086	0.475116	0.988192	-5.99476	-5.60691	-7.61769	0.896546	1.21437	0.573858	2.02892	1.25338	0.897177	2.12645	3.07894
1	Ntome_NODE_10470_length_2135_cov_279	ALN_ARATH^ALN_ARATH^Q:2127-724,H:34-499^71.489%ID^E:0^RecName: Full=Allantoinase;^Eukaryota; Viridiplantae; Streptophyta; Embryophyta; Tracheophyta; Spermatophyta; Magnoliopsida; eudicotyledons; Gunneridae; Pentapetalae; rosids; malvids; Brassicales; Brassicaceae; Camelineae; Arabidopsis	1.10263	0.844153	-0.528857	-0.0823795	-0.76654	-0.263096	-2.81732	-2.40904	-1.89061	0.891667	-0.255007	0.179191	0.501457	-0.0277967	-0.0795468	3.06862	2.53247
1	Ntome_NODE_10471_length_2135_cov_211	.	1.12774	1.05389	1.05869	1.12521	0.934972	0.915047	-6.94007	-4.0981	-6.94007	1.26039	1.25656	1.18823	1.56013	1.08966	1.17325	2.30165	1.93282
1	Ntome_NODE_10472_length_2135_cov_206	.	1.69579	1.41785	-0.561134	0.263323	0.356068	0.309698	-4.23091	-4.74006	-6.29096	1.35815	0.972451	1.43941	1.04925	1.46239	1.01273	2.03547	2.45047
1	Ntome_NODE_10473_length_2135_cov_149	.	1.22244	0.963503	0.741111	-0.768546	-0.164117	0.512676	-1.66316	-1.29868	-2.44167	-0.330969	-0.254459	0.0176204	0.696221	0.322314	-0.0111235	0.987295	1.46955
1	Ntome_NODE_10477_length_2134_cov_305	PLCD2_ARATH^PLCD2_ARATH^Q:172-1935,H:1-581^68.475%ID^E:0^RecName: Full=Phosphoinositide phospholipase C 2;^Eukaryota; Viridiplantae; Streptophyta; Embryophyta; Tracheophyta; Spermatophyta; Magnoliopsida; eudicotyledons; Gunneridae; Pentapetalae; rosids; malvids; Brassicales; Brassicaceae; Camelineae; Arabidopsis	0.351871	0.574117	-0.422912	-0.20175	-0.220443	0.143385	-2.80971	-3.45528	-3.12027	1.29507	0.223052	0.624037	1.17087	1.06625	0.861281	2.05728	1.86316
1	Ntome_NODE_10478_length_2134_cov_296	ADCK1_HUMAN^ADCK1_HUMAN^Q:1978-1151,H:71-340^36.879%ID^E:6.68e-47^RecName: Full=Uncharacterized aarF domain-containing protein kinase 1;^Eukaryota; Metazoa; Chordata; Craniata; Vertebrata; Euteleostomi; Mammalia; Eutheria; Euarchontoglires; Primates; Haplorrhini; Catarrhini; Hominidae; Homo	2.1409	1.85064	0.319879	0.140614	-0.93672	-0.536856	-4.82663	-6.11941	-6.11941	1.61252	1.49795	1.56091	2.24918	1.38807	1.37292	2.10285	2.30261
1	Ntome_NODE_10479_length_2134_cov_285	THOC2_ARATH^THOC2_ARATH^Q:115-2133,H:1-668^70.728%ID^E:0^RecName: Full=THO complex subunit 2;^Eukaryota; Viridiplantae; Streptophyta; Embryophyta; Tracheophyta; Spermatophyta; Magnoliopsida; eudicotyledons; Gunneridae; Pentapetalae; rosids; malvids; Brassicales; Brassicaceae; Camelineae; Arabidopsis	1.95756	2.00724	0.602513	-0.550434	-0.432648	0.154949	-4.62168	-4.62168	-4.62168	1.68593	0.493518	0.546238	0.956955	1.3074	0.718168	1.39513	3.02254
1	Ntome_NODE_1048_length_5024_cov_76	MSH4_ARATH^MSH4_ARATH^Q:4989-2617,H:1-791^77.75%ID^E:0^RecName: Full=DNA mismatch repair protein MSH4;^Eukaryota; Viridiplantae; Streptophyta; Embryophyta; Tracheophyta; Spermatophyta; Magnoliopsida; eudicotyledons; Gunneridae; Pentapetalae; rosids; malvids; Brassicales; Brassicaceae; Camelineae; Arabidopsis	1.54156	0.999241	-0.236482	-0.0237949	-0.973737	-0.6684	-2.77028	-2.13753	-3.167	1.24597	0.0556261	0.334524	1.44067	1.19538	1.17072	0.749123	1.24441
1	Ntome_NODE_10480_length_2134_cov_226	PLGG1_ARATH^PLGG1_ARATH^Q:326-1684,H:60-512^79.691%ID^E:0^RecName: Full=Plastidal glycolate/glycerate translocator 1, chloroplastic;^Eukaryota; Viridiplantae; Streptophyta; Embryophyta; Tracheophyta; Spermatophyta; Magnoliopsida; eudicotyledons; Gunneridae; Pentapetalae; rosids; malvids; Brassicales; Brassicaceae; Camelineae; Arabidopsis	1.92903	1.75359	1.07859	-0.108416	-1.19135	0.0153591	-5.42094	-5.13405	-5.42094	2.02126	1.74999	1.62695	0.626297	0.597654	-0.274851	2.39285	3.75897
1	Ntome_NODE_10482_length_2134_cov_184	HXNY_EMENI^HXNY_EMENI^Q:1035-1724,H:98-327^37.975%ID^E:1.58e-30^RecName: Full=2-oxoglutarate-Fe(II) type oxidoreductase hxnY {ECO:0000305};^Eukaryota; Fungi; Dikarya; Ascomycota; Pezizomycotina; Eurotiomycetes; Eurotiomycetidae; Eurotiales; Aspergillaceae; Aspergillus	1.06762	1.45521	-0.0159714	0.276781	-0.00724536	0.536537	-4.32194	-4.32194	-3.25155	0.68166	0.190285	0.0676249	1.00431	0.430807	0.818428	1.99674	3.39265
1	Ntome_NODE_10483_length_2134_cov_45	.	0.63438	0.605516	-0.223491	-0.891983	-1.17209	0.378106	-1.97945	-2.39448	-2.39448	0.544116	0.149837	0.760942	1.64991	0.108017	0.0205537	1.80086	2.40374
1	Ntome_NODE_10485_length_2134_cov_28	.	-0.110408	0.30463	0.30463	-0.373442	-0.69537	-1.69537	-1.69537	-1.11041	-2.69537	1.00507	-0.110408	0.889592	1.69695	1.62656	0.889592	1.00507	0.764061
1	Ntome_NODE_10486_length_2133_cov_262	ENO3_ARATH^ENO3_ARATH^Q:318-1733,H:1-472^81.568%ID^E:0^RecName: Full=Cytosolic enolase 3;^Eukaryota; Viridiplantae; Streptophyta; Embryophyta; Tracheophyta; Spermatophyta; Magnoliopsida; eudicotyledons; Gunneridae; Pentapetalae; rosids; malvids; Brassicales; Brassicaceae; Camelineae; Arabidopsis	1.1859	1.17672	-0.515299	0.072453	-0.650023	-0.00923077	-2.97129	-2.56057	-3.85923	0.68368	0.423054	0.14058	1.21297	1.04416	0.647997	1.36671	2.61143
1	Ntome_NODE_10487_length_2133_cov_220	REM41_ORYSJ^REM41_ORYSJ^Q:608-282,H:202-310^43.119%ID^E:1.81e-10^RecName: Full=Remorin 4.1 {ECO:0000305};^Eukaryota; Viridiplantae; Streptophyta; Embryophyta; Tracheophyta; Spermatophyta; Magnoliopsida; Liliopsida; Poales; Poaceae; BOP clade; Oryzoideae; Oryzeae; Oryzinae; Oryza; Oryza sativa	1.32102	1.21395	-0.442895	0.601615	0.430088	0.368733	-4.43475	-4.12413	-4.4654	0.973775	1.04967	0.904834	0.824987	0.788108	0.113095	2.37793	2.49936
1	Ntome_NODE_10489_length_2133_cov_218	LIP5_ARATH^LIP5_ARATH^Q:1975-1670,H:1-102^82.353%ID^E:7.22e-49^RecName: Full=Protein HOMOLOG OF MAMMALIAN LYST-INTERACTING PROTEIN 5 {ECO:0000303|PubMed:17468262};^Eukaryota; Viridiplantae; Streptophyta; Embryophyta; Tracheophyta; Spermatophyta; Magnoliopsida; eudicotyledons; Gunneridae; Pentapetalae; rosids; malvids; Brassicales; Brassicaceae; Camelineae; Arabidopsis`LIP5_ARATH^LIP5_ARATH^Q:664-…	2.2598	2.27489	0.740134	0.553001	-0.37248	0.509511	-4.47079	-3.88764	-4.17634	0.632913	0.254766	0.482703	1.23362	-0.0322966	0.427546	1.48849	2.08218
1	Ntome_NODE_1049_length_5022_cov_224	GLO4_ARATH^GLO4_ARATH^Q:4626-3928,H:5-237^74.678%ID^E:1.08e-111^RecName: Full=Peroxisomal (S)-2-hydroxy-acid oxidase GLO4;^Eukaryota; Viridiplantae; Streptophyta; Embryophyta; Tracheophyta; Spermatophyta; Magnoliopsida; eudicotyledons; Gunneridae; Pentapetalae; rosids; malvids; Brassicales; Brassicaceae; Camelineae; Arabidopsis`GLO4_ARATH^GLO4_ARATH^Q:2711-2445,H:269-357^70.787%ID^E:6.72e-34^RecN…	-0.301423	0.255103	-0.189637	0.43765	0.636726	1.18712	-3.30104	-3.37927	-3.07887	0.371736	0.246912	-0.0558314	1.1111	0.618537	0.143213	2.4886	2.80937
1	Ntome_NODE_10490_length_2133_cov_177	OST3B_ARATH^OST3B_ARATH^Q:172-1098,H:34-345^63.462%ID^E:2.81e-143^RecName: Full=Probable dolichyl-diphosphooligosaccharide--protein glycosyltransferase subunit 3B;^Eukaryota; Viridiplantae; Streptophyta; Embryophyta; Tracheophyta; Spermatophyta; Magnoliopsida; eudicotyledons; Gunneridae; Pentapetalae; rosids; malvids; Brassicales; Brassicaceae; Camelineae; Arabidopsis	2.43334	2.00638	1.30014	1.57344	1.07779	0.962873	-7.58317	-5.86071	-6.56882	0.964531	0.753646	0.964917	1.26751	0.670816	0.537272	2.74447	2.75556
1	Ntome_NODE_10491_length_2133_cov_175	RFA1B_ARATH^RFA1B_ARATH^Q:1191-661,H:379-563^23.529%ID^E:5.55e-15^RecName: Full=Replication protein A 70 kDa DNA-binding subunit B;^Eukaryota; Viridiplantae; Streptophyta; Embryophyta; Tracheophyta; Spermatophyta; Magnoliopsida; eudicotyledons; Gunneridae; Pentapetalae; rosids; malvids; Brassicales; Brassicaceae; Camelineae; Arabidopsis`RFA1B_ARATH^RFA1B_ARATH^Q:1669-1268,H:229-366^25.517%ID^E:5.…	0.770292	0.625261	-0.0736097	-0.761362	-0.761362	-0.178804	-4.93209	-3.93209	-4.93209	2.24792	1.63853	1.79583	2.24433	1.57571	1.26129	1.42546	1.98678
1	Ntome_NODE_10492_length_2133_cov_153	MD33B_ARATH^MD33B_ARATH^Q:571-1623,H:920-1270^68.644%ID^E:4.19e-134^RecName: Full=Mediator of RNA polymerase II transcription subunit 33B;^Eukaryota; Viridiplantae; Streptophyta; Embryophyta; Tracheophyta; Spermatophyta; Magnoliopsida; eudicotyledons; Gunneridae; Pentapetalae; rosids; malvids; Brassicales; Brassicaceae; Camelineae; Arabidopsis	1.61532	1.89794	0.252409	1.14591	0.500126	0.127814	-3.65028	-3.08112	-4.72445	0.299749	0.648355	0.12873	0.640507	0.518942	0.124373	1.71887	1.83681
1	Ntome_NODE_10493_length_2133_cov_128	RLA2_PARAR^RLA2_PARAR^Q:1396-1515,H:28-67^80%ID^E:2.69e-13^RecName: Full=60S acidic ribosomal protein P2;^Eukaryota; Viridiplantae; Streptophyta; Embryophyta; Tracheophyta; Spermatophyta; Magnoliopsida; eudicotyledons; Gunneridae; Pentapetalae; asterids; campanulids; Asterales; Asteraceae; Asteroideae; Heliantheae alliance; Heliantheae; Parthenium	1.1065	0.955741	-0.529619	1.29843	1.01144	1.05025	-5.98905	-5.44022	-6.21683	1.18323	1.37642	0.918335	1.90918	1.27198	0.443228	2.59137	3.05963
1	Ntome_NODE_10494_length_2131_cov_48	LAC12_ARATH^LAC12_ARATH^Q:129-1781,H:19-565^78.623%ID^E:0^RecName: Full=Laccase-12;^Eukaryota; Viridiplantae; Streptophyta; Embryophyta; Tracheophyta; Spermatophyta; Magnoliopsida; eudicotyledons; Gunneridae; Pentapetalae; rosids; malvids; Brassicales; Brassicaceae; Camelineae; Arabidopsis	-2.34173	0.574633	-0.683998	1.30829	2.38525	2.42093	-4.29257	-3.57011	-3.09345	1.11267	0.331998	0.337135	0.880956	-0.267188	-0.251153	3.38948	1.75884
1	Ntome_NODE_10495_length_2133_cov_18	ESP3_ARATH^ESP3_ARATH^Q:3-1145,H:663-1043^81.102%ID^E:0^RecName: Full=Pre-mRNA-splicing factor ATP-dependent RNA helicase DEAH1 {ECO:0000305};^Eukaryota; Viridiplantae; Streptophyta; Embryophyta; Tracheophyta; Spermatophyta; Magnoliopsida; eudicotyledons; Gunneridae; Pentapetalae; rosids; malvids; Brassicales; Brassicaceae; Camelineae; Arabidopsis	1.08877	-0.375311	-0.0547695	-1.17025	-0.0547695	0.232112	-3.75521	-2.6576	-3.75521	0.688397	0.928487	1.14783	1.72247	1.58642	1.93353	0.829753	1.66534
1	Ntome_NODE_10496_length_2133_cov_10	CDPKT_ARATH^CDPKT_ARATH^Q:186-770,H:63-257^78.974%ID^E:2.08e-104^RecName: Full=Calcium-dependent protein kinase 29;^Eukaryota; Viridiplantae; Streptophyta; Embryophyta; Tracheophyta; Spermatophyta; Magnoliopsida; eudicotyledons; Gunneridae; Pentapetalae; rosids; malvids; Brassicales; Brassicaceae; Camelineae; Arabidopsis	1.09446	1.09249	-0.385606	0.939609	0.441723	1.15793	-3.36563	-2.36563	-3.36563	1.026	-1.78067	-0.365632	0.954853	0.22533	-0.558277	2.62032	2.63437
1	Ntome_NODE_10497_length_2132_cov_274	NAC17_ARATH^NAC17_ARATH^Q:289-2031,H:18-553^41.167%ID^E:2.06e-109^RecName: Full=NAC domain-containing protein 17 {ECO:0000303|PubMed:15029955};^Eukaryota; Viridiplantae; Streptophyta; Embryophyta; Tracheophyta; Spermatophyta; Magnoliopsida; eudicotyledons; Gunneridae; Pentapetalae; rosids; malvids; Brassicales; Brassicaceae; Camelineae; Arabidopsis	1.08317	2.30701	0.221058	-0.086727	0.113278	0.0726791	-3.48666	-4.49799	-5.12685	2.03233	0.489152	0.171308	1.12589	0.935664	1.39533	1.26998	1.98137
1	Ntome_NODE_10498_length_2130_cov_265	CTLHA_DICDI^CTLHA_DICDI^Q:928-281,H:294-516^21.93%ID^E:2.46e-10^RecName: Full=CTL-like protein DDB_G0288717;^Eukaryota; Amoebozoa; Mycetozoa; Dictyostelids; Dictyosteliales; Dictyosteliaceae; Dictyostelium	1.17678	0.81497	0.791583	1.24528	0.722044	0.547329	-5.05397	-3.76831	-5.31961	1.06504	0.583302	0.547916	1.27061	0.725048	0.895191	1.77015	1.98664
1	Ntome_NODE_10499_length_2132_cov_259	TRO_ARATH^TRO_ARATH^Q:614-1378,H:250-504^81.176%ID^E:3.83e-154^RecName: Full=Protein TRAUCO {ECO:0000303|PubMed:20118203};^Eukaryota; Viridiplantae; Streptophyta; Embryophyta; Tracheophyta; Spermatophyta; Magnoliopsida; eudicotyledons; Gunneridae; Pentapetalae; rosids; malvids; Brassicales; Brassicaceae; Camelineae; Arabidopsis	1.30715	1.21199	0.896479	1.26239	0.716948	1.39499	-7.22251	-7.22251	-7.22251	1.49221	1.40221	1.28175	2.02359	1.99828	1.31684	2.58806	2.77467
1	Ntome_NODE_105_length_8440_cov_257	HIP1_ORYSJ^HIP1_ORYSJ^Q:590-249,H:551-665^59.483%ID^E:3.78e-34^RecName: Full=Probable E3 ubiquitin-protein ligase HIP1;^Eukaryota; Viridiplantae; Streptophyta; Embryophyta; Tracheophyta; Spermatophyta; Magnoliopsida; Liliopsida; Poales; Poaceae; BOP clade; Oryzoideae; Oryzeae; Oryzinae; Oryza; Oryza sativa	1.42776	1.34299	0.295396	-0.174631	-0.0798069	0.143361	-5.99664	-4.09067	-5.48621	1.44567	1.01491	1.0785	1.80157	1.61168	1.85182	1.83407	1.98022
1	Ntome_NODE_1050_length_5020_cov_242	CESA6_ARATH^CESA6_ARATH^Q:3840-583,H:1-1083^78.991%ID^E:0^RecName: Full=Cellulose synthase A catalytic subunit 6 [UDP-forming];^Eukaryota; Viridiplantae; Streptophyta; Embryophyta; Tracheophyta; Spermatophyta; Magnoliopsida; eudicotyledons; Gunneridae; Pentapetalae; rosids; malvids; Brassicales; Brassicaceae; Camelineae; Arabidopsis	1.97413	1.71408	0.532814	0.474618	0.457107	0.318503	-3.24059	-2.57226	-3.90205	0.386128	0.519638	-0.0543464	0.550483	0.57904	-0.275812	0.785963	1.75257
1	Ntome_NODE_10501_length_2132_cov_222	.	1.52483	1.53061	-0.577241	1.05269	0.120076	0.884959	-8.09444	-6.01378	-6.43909	2.11944	1.6089	1.83529	2.01288	1.07383	1.01829	2.91119	3.43155
1	Ntome_NODE_10502_length_2129_cov_216	.	1.78641	1.45098	0.228804	1.00591	0.202732	-0.273782	-4.12071	-3.73987	-3.21709	0.39991	0.0406433	-0.0507652	1.06608	0.663824	0.663063	2.0823	1.81155
1	Ntome_NODE_10503_length_2132_cov_173	HOS15_ARATH^HOS15_ARATH^Q:948-1724,H:355-613^79.151%ID^E:1.46e-138^RecName: Full=WD40 repeat-containing protein HOS15 {ECO:0000305};^Eukaryota; Viridiplantae; Streptophyta; Embryophyta; Tracheophyta; Spermatophyta; Magnoliopsida; eudicotyledons; Gunneridae; Pentapetalae; rosids; malvids; Brassicales; Brassicaceae; Camelineae; Arabidopsis`HOS15_ARATH^HOS15_ARATH^Q:1197-1598,H:255-395^34.437%ID^E:2…	1.71754	1.47378	0.251121	0.491203	0.470225	0.470225	-5.5027	-5.5027	-3.27619	0.890307	0.504947	0.258056	1.3858	1.0442	0.739905	1.84071	2.74357
1	Ntome_NODE_10505_length_2131_cov_270	BYR3_SCHPO^BYR3_SCHPO^Q:1460-969,H:19-174^33.526%ID^E:7.16e-15^RecName: Full=Cellular nucleic acid-binding protein homolog;^Eukaryota; Fungi; Dikarya; Ascomycota; Taphrinomycotina; Schizosaccharomycetes; Schizosaccharomycetales; Schizosaccharomycetaceae; Schizosaccharomyces`BYR3_SCHPO^BYR3_SCHPO^Q:1394-963,H:19-154^32.68%ID^E:9.15e-11^RecName: Full=Cellular nucleic acid-binding protein homolog;^E…	1.70945	1.54816	0.473885	0.65685	0.143464	0.406499	-5.96162	-4.81159	-7.09255	1.26399	1.27892	1.08322	1.93624	1.64865	1.80955	2.01074	1.89613
1	Ntome_NODE_10506_length_2131_cov_108	ATPG_TOBAC^ATPG_TOBAC^Q:308-1348,H:33-376^68.876%ID^E:1.27e-162^RecName: Full=ATP synthase gamma chain, chloroplastic;^Eukaryota; Viridiplantae; Streptophyta; Embryophyta; Tracheophyta; Spermatophyta; Magnoliopsida; eudicotyledons; Gunneridae; Pentapetalae; asterids; lamiids; Solanales; Solanaceae; Nicotianoideae; Nicotianeae; Nicotiana	1.5813	1.47215	1.27951	0.355746	0.152954	0.976218	-5.4529	-5.4529	-5.4529	0.93925	1.10062	1.09168	1.47322	1.08905	0.283709	1.95548	2.6078
1	Ntome_NODE_10509_length_2130_cov_310	YGSA_SCHPO^YGSA_SCHPO^Q:9-2063,H:1081-1658^27.834%ID^E:8.48e-53^RecName: Full=Uncharacterized ATP-dependent helicase C29A10.10c;^Eukaryota; Fungi; Dikarya; Ascomycota; Taphrinomycotina; Schizosaccharomycetes; Schizosaccharomycetales; Schizosaccharomycetaceae; Schizosaccharomyces	2.17651	2.00076	-0.00712063	0.0838247	0.611387	0.21956	-5.51237	-6.67586	-6.67586	1.86446	1.42753	1.09563	1.64421	1.49581	1.53792	1.93719	2.77642
1	Ntome_NODE_1051_length_5019_cov_231	SWI3D_ARATH^SWI3D_ARATH^Q:4912-2093,H:1-973^45.02%ID^E:0^RecName: Full=SWI/SNF complex subunit SWI3D;^Eukaryota; Viridiplantae; Streptophyta; Embryophyta; Tracheophyta; Spermatophyta; Magnoliopsida; eudicotyledons; Gunneridae; Pentapetalae; rosids; malvids; Brassicales; Brassicaceae; Camelineae; Arabidopsis	1.16691	1.40514	0.366175	-0.175683	-0.297827	0.35458	-4.27964	-3.87906	-4.11409	0.914403	0.71116	0.530514	1.1897	1.16156	0.64311	1.84381	2.45925
1	Ntome_NODE_10510_length_2130_cov_296	ST38L_HUMAN^ST38L_HUMAN^Q:294-1613,H:20-449^48.073%ID^E:1.94e-126^RecName: Full=Serine/threonine-protein kinase 38-like;^Eukaryota; Metazoa; Chordata; Craniata; Vertebrata; Euteleostomi; Mammalia; Eutheria; Euarchontoglires; Primates; Haplorrhini; Catarrhini; Hominidae; Homo	1.5121	1.23011	-0.175833	0.86085	0.412357	1.00621	-3.0089	-4.43421	-1.72324	0.324237	-0.678812	-0.861896	-0.151274	0.285131	-0.0830378	3.48826	1.99796
1	Ntome_NODE_10512_length_2130_cov_287	COAC1_ARATH^COAC1_ARATH^Q:564-1577,H:3-329^69.591%ID^E:5.35e-149^RecName: Full=Mitochondrial carrier protein CoAc1 {ECO:0000305};^Eukaryota; Viridiplantae; Streptophyta; Embryophyta; Tracheophyta; Spermatophyta; Magnoliopsida; eudicotyledons; Gunneridae; Pentapetalae; rosids; malvids; Brassicales; Brassicaceae; Camelineae; Arabidopsis	1.75888	2.02078	0.428296	-0.278201	-0.0946264	0.2857	-2.97132	-5.1121	-5.1121	0.712919	0.616362	0.576917	1.18857	0.795989	0.408634	2.37171	2.4036
1	Ntome_NODE_10513_length_2130_cov_250	SMU1_ARATH^SMU1_ARATH^Q:1933-404,H:3-511^84.314%ID^E:0^RecName: Full=Suppressor of mec-8 and unc-52 protein homolog 1;^Eukaryota; Viridiplantae; Streptophyta; Embryophyta; Tracheophyta; Spermatophyta; Magnoliopsida; eudicotyledons; Gunneridae; Pentapetalae; rosids; malvids; Brassicales; Brassicaceae; Camelineae; Arabidopsis	1.92613	1.43852	-0.0536999	0.0495892	-0.119346	0.569171	-2.41026	-3.18152	-4.3368	0.34883	0.123103	0.1812	1.49051	0.885562	-0.0210972	0.8851	2.225
1	Ntome_NODE_10514_length_2130_cov_242	.	0.480271	0.617568	0.274461	-0.00652107	0.716138	1.50601	-4.76993	-4.76993	-4.76993	0.628897	0.625473	0.955536	1.19839	0.85709	1.17516	2.48141	2.79992
1	Ntome_NODE_10515_length_2130_cov_237	.	0.296613	1.26343	0.487887	1.01214	0.628464	1.77711	-5.11944	-6.03018	-6.03018	0.899141	-0.429669	-0.314283	1.36412	1.45178	0.964064	3.4125	4.36649
1	Ntome_NODE_10516_length_2130_cov_214	PIRL6_ORYSJ^PIRL6_ORYSJ^Q:177-1373,H:1-401^66.833%ID^E:8.05e-137^RecName: Full=Plant intracellular Ras-group-related LRR protein 6;^Eukaryota; Viridiplantae; Streptophyta; Embryophyta; Tracheophyta; Spermatophyta; Magnoliopsida; Liliopsida; Poales; Poaceae; BOP clade; Oryzoideae; Oryzeae; Oryzinae; Oryza; Oryza sativa`PIRL6_ORYSJ^PIRL6_ORYSJ^Q:315-1184,H:300-586^25.982%ID^E:2.86e-07^RecName: Full…	2.28408	2.46785	0.390803	0.00627471	0.127356	0.209414	-4.80749	-6.41629	-6.41629	1.60685	1.05139	1.21583	1.26276	1.79992	1.24534	1.57239	2.39982
1	Ntome_NODE_10517_length_2130_cov_196	IDND_VITVI^IDND_VITVI^Q:1821-775,H:18-366^77.65%ID^E:0^RecName: Full=L-idonate 5-dehydrogenase;^Eukaryota; Viridiplantae; Streptophyta; Embryophyta; Tracheophyta; Spermatophyta; Magnoliopsida; eudicotyledons; Gunneridae; Pentapetalae; rosids; Vitales; Vitaceae; Viteae; Vitis	3.5028	3.5957	1.31871	2.28009	2.35013	1.52631	-7.57356	-6.62496	-5.74168	0.0414455	0.671614	0.370597	0.713646	-0.451611	-0.174046	1.92108	2.27373
1	Ntome_NODE_10518_length_2130_cov_121	RL7A1_ARATH^RL7A1_ARATH^Q:1259-1780,H:84-257^87.931%ID^E:2.82e-105^RecName: Full=60S ribosomal protein L7a-1;^Eukaryota; Viridiplantae; Streptophyta; Embryophyta; Tracheophyta; Spermatophyta; Magnoliopsida; eudicotyledons; Gunneridae; Pentapetalae; rosids; malvids; Brassicales; Brassicaceae; Camelineae; Arabidopsis	2.30388	1.94448	0.908465	1.37811	0.763186	1.21439	-6.27828	-7.40227	-7.25186	1.04229	0.993861	0.904682	1.77087	1.13286	0.524691	2.46157	3.58906
1	Ntome_NODE_10519_length_2130_cov_114	IPCS1_ARATH^IPCS1_ARATH^Q:416-1039,H:1-208^76.442%ID^E:3.77e-112^RecName: Full=Phosphatidylinositol:ceramide inositolphosphotransferase 1;^Eukaryota; Viridiplantae; Streptophyta; Embryophyta; Tracheophyta; Spermatophyta; Magnoliopsida; eudicotyledons; Gunneridae; Pentapetalae; rosids; malvids; Brassicales; Brassicaceae; Camelineae; Arabidopsis	0.997653	0.875587	-0.256104	0.0724676	1.11406	-0.450018	-3.95654	-2.95654	-4.95654	2.04301	-0.0496529	-0.110552	1.32997	0.658755	-0.634615	4.49415	1.78492
1	Ntome_NODE_1052_length_5017_cov_183	L2HDH_ARATH^L2HDH_ARATH^Q:4787-3522,H:47-483^59.184%ID^E:4.43e-161^RecName: Full=L-2-hydroxyglutarate dehydrogenase, mitochondrial {ECO:0000305};^Eukaryota; Viridiplantae; Streptophyta; Embryophyta; Tracheophyta; Spermatophyta; Magnoliopsida; eudicotyledons; Gunneridae; Pentapetalae; rosids; malvids; Brassicales; Brassicaceae; Camelineae; Arabidopsis	1.43215	0.998718	0.457703	0.652996	0.146476	1.11136	-7.24412	-4.63531	-6.18062	1.07184	1.26141	1.06062	2.10642	1.49431	0.927554	2.37189	2.96661
1	Ntome_NODE_10521_length_2130_cov_20	Y4729_ARATH^Y4729_ARATH^Q:36-992,H:15-344^39.823%ID^E:1.14e-62^RecName: Full=G-type lectin S-receptor-like serine/threonine-protein kinase At4g27290;^Eukaryota; Viridiplantae; Streptophyta; Embryophyta; Tracheophyta; Spermatophyta; Magnoliopsida; eudicotyledons; Gunneridae; Pentapetalae; rosids; malvids; Brassicales; Brassicaceae; Camelineae; Arabidopsis	1.10672	1.36976	-0.893276	-0.893276	0.369758	0.244227	-3.2152	-3.2152	-2.2152	0.485235	0.369758	0.872259	1.87226	1.73899	0.485235	0.485235	1.03272
1	Ntome_NODE_10522_length_2128_cov_278	ALAT2_ARATH^ALAT2_ARATH^Q:278-1711,H:62-539^83.473%ID^E:0^RecName: Full=Alanine aminotransferase 2, mitochondrial;^Eukaryota; Viridiplantae; Streptophyta; Embryophyta; Tracheophyta; Spermatophyta; Magnoliopsida; eudicotyledons; Gunneridae; Pentapetalae; rosids; malvids; Brassicales; Brassicaceae; Camelineae; Arabidopsis	2.17274	2.18218	0.847603	0.884456	0.379645	1.05599	-7.81018	-7.81018	-6.73294	1.59177	1.13895	1.17825	2.18019	1.7372	1.85888	2.06454	3.08091
1	Ntome_NODE_10523_length_2129_cov_220	AAE11_ARATH^AAE11_ARATH^Q:111-1127,H:1-309^50.737%ID^E:3.95e-123^RecName: Full=Butyrate--CoA ligase AAE11, peroxisomal;^Eukaryota; Viridiplantae; Streptophyta; Embryophyta; Tracheophyta; Spermatophyta; Magnoliopsida; eudicotyledons; Gunneridae; Pentapetalae; rosids; malvids; Brassicales; Brassicaceae; Camelineae; Arabidopsis`AAE11_ARATH^AAE11_ARATH^Q:1127-1444,H:313-418^55.66%ID^E:3.95e-123^RecNa…	1.61233	1.33828	0.463941	-1.05063	-1.85799	0.949367	-5.44295	-5.44295	-3.41792	1.35147	1.03295	1.66547	2.9102	2.29176	2.83801	-0.121022	0.879699
1	Ntome_NODE_10525_length_2129_cov_93	NAA40_XENLA^NAA40_XENLA^Q:123-827,H:2-216^33.054%ID^E:2.11e-29^RecName: Full=N-alpha-acetyltransferase 40 {ECO:0000250|UniProtKB:Q86UY6};^Eukaryota; Metazoa; Chordata; Craniata; Vertebrata; Euteleostomi; Amphibia; Batrachia; Anura; Pipoidea; Pipidae; Xenopodinae; Xenopus; Xenopus	1.28377	1.7432	-0.2308	-0.235962	-0.716227	-0.231831	-4.03816	-3.03816	-4.03816	1.38811	0.283773	0.0484589	1.3194	1.54651	0.605701	1.63427	2.67609
1	Ntome_NODE_10528_length_2128_cov_298	RAP24_ARATH^RAP24_ARATH^Q:1113-1706,H:123-332^62.617%ID^E:2.67e-59^RecName: Full=Ethylene-responsive transcription factor RAP2-4;^Eukaryota; Viridiplantae; Streptophyta; Embryophyta; Tracheophyta; Spermatophyta; Magnoliopsida; eudicotyledons; Gunneridae; Pentapetalae; rosids; malvids; Brassicales; Brassicaceae; Camelineae; Arabidopsis	1.88033	2.23252	1.9096	1.46373	1.08764	1.00857	-6.91883	-5.5305	-9.8122	2.07235	0.929726	0.579424	1.44391	1.58963	1.81128	2.24003	2.01276
1	Ntome_NODE_10529_length_2128_cov_207	.	-0.234493	-0.380101	0.549441	0.895826	0.655087	1.1194	-6.09297	-3.77104	-6.09297	1.30816	1.20916	0.865059	2.16385	1.5656	1.31319	2.13103	2.79577
1	Ntome_NODE_1053_length_5017_cov_65	PP432_ARATH^PP432_ARATH^Q:4729-1568,H:19-1074^50.663%ID^E:0^RecName: Full=Pentatricopeptide repeat-containing protein At5g55840;^Eukaryota; Viridiplantae; Streptophyta; Embryophyta; Tracheophyta; Spermatophyta; Magnoliopsida; eudicotyledons; Gunneridae; Pentapetalae; rosids; malvids; Brassicales; Brassicaceae; Camelineae; Arabidopsis	1.77972	1.23431	0.275815	0.112961	-1.03904	-0.208967	-4.20897	-3.1804	-4.20897	0.792384	0.249808	-0.0390425	1.83761	1.28673	-0.545623	2.44896	3.41272
1	Ntome_NODE_10530_length_2127_cov_74	.	1.82533	1.13018	1.90779	0.438302	-0.94021	1.64475	-3.26214	-3.26214	-3.26214	0.457046	0.545217	0.799638	1.26142	0.977413	0.219419	-0.677175	0.197294
1	Ntome_NODE_10532_length_2128_cov_65	JAR6_NICAT^JAR6_NICAT^Q:1892-171,H:4-579^85.938%ID^E:0^RecName: Full=Jasmonoyl--L-amino acid synthetase JAR6 {ECO:0000305};^Eukaryota; Viridiplantae; Streptophyta; Embryophyta; Tracheophyta; Spermatophyta; Magnoliopsida; eudicotyledons; Gunneridae; Pentapetalae; asterids; lamiids; Solanales; Solanaceae; Nicotianoideae; Nicotianeae; Nicotiana	0.270143	0.113418	0.325948	1.34576	0.864078	1.98152	-3.6329	-3.6329	-3.6329	1.50993	0.0608705	0.866632	-0.790922	-0.124467	0.294053	2.38903	1.7927
1	Ntome_NODE_10533_length_2128_cov_23	PPP7L_ARATH^PPP7L_ARATH^Q:1623-976,H:245-464^30.222%ID^E:8.75e-25^RecName: Full=Serine/threonine-protein phosphatase 7 long form homolog;^Eukaryota; Viridiplantae; Streptophyta; Embryophyta; Tracheophyta; Spermatophyta; Magnoliopsida; eudicotyledons; Gunneridae; Pentapetalae; rosids; malvids; Brassicales; Brassicaceae; Camelineae; Arabidopsis`PPP7L_ARATH^PPP7L_ARATH^Q:1817-1611,H:180-248^36.232%I…	2.27769	1.69106	-0.172616	-0.0472368	-0.484121	-0.435287	-3.15994	-2.15994	-3.15994	1.07502	0.540503	0.919868	-0.446241	-0.838009	0.161991	1.47349	2.76369
1	Ntome_NODE_10534_length_2127_cov_297	GDAP2_NEMVE^GDAP2_NEMVE^Q:243-1820,H:3-487^33.396%ID^E:1.56e-91^RecName: Full=Protein GDAP2 homolog;^Eukaryota; Metazoa; Cnidaria; Anthozoa; Hexacorallia; Actiniaria; Edwardsiidae; Nematostella	1.16753	1.56911	-0.338319	-0.665164	-0.104565	0.279124	-3.77401	-3.58821	-3.59177	0.913922	0.6303	0.173053	1.20433	0.978776	1.06026	1.63835	2.44729
1	Ntome_NODE_10535_length_2127_cov_277	RIO1_DICDI^RIO1_DICDI^Q:1823-651,H:81-485^52.217%ID^E:1.13e-141^RecName: Full=Serine/threonine-protein kinase rio1;^Eukaryota; Amoebozoa; Mycetozoa; Dictyostelids; Dictyosteliales; Dictyosteliaceae; Dictyostelium	2.34233	1.69238	1.52252	0.702138	0.354977	0.799845	-5.56907	-4.54917	-6.6801	0.783672	1.15482	0.616911	1.58996	0.727765	0.534416	1.74298	2.23363
1	Ntome_NODE_10536_length_2127_cov_266	PER41_ARATH^PER41_ARATH^Q:1849-956,H:26-322^58.054%ID^E:2.85e-116^RecName: Full=Peroxidase 41;^Eukaryota; Viridiplantae; Streptophyta; Embryophyta; Tracheophyta; Spermatophyta; Magnoliopsida; eudicotyledons; Gunneridae; Pentapetalae; rosids; malvids; Brassicales; Brassicaceae; Camelineae; Arabidopsis	2.16949	1.96021	0.797902	1.17902	0.670085	0.866683	-5.91796	-7.64479	-3.26489	0.47907	0.31347	0.152285	1.47407	0.561343	-0.117863	3.23437	3.08752
1	Ntome_NODE_10537_length_2127_cov_239	.	0.487204	0.931422	-0.296468	-1.16557	-0.639038	-0.277319	-3.40345	-2.06521	-2.15837	0.818116	0.705969	0.138864	1.19396	0.901162	0.653317	1.67088	2.50454
1	Ntome_NODE_10538_length_2127_cov_137	EGY2_ARATH^EGY2_ARATH^Q:1860-259,H:1-551^62.345%ID^E:0^RecName: Full=Probable zinc metalloprotease EGY2, chloroplastic;^Eukaryota; Viridiplantae; Streptophyta; Embryophyta; Tracheophyta; Spermatophyta; Magnoliopsida; eudicotyledons; Gunneridae; Pentapetalae; rosids; malvids; Brassicales; Brassicaceae; Camelineae; Arabidopsis	1.04595	0.886554	-1.28569	0.403057	-0.869782	-0.961327	-4.32271	-4.27356	-5.33706	1.50742	1.64935	1.1739	2.23742	1.25659	1.30492	2.29266	3.2923
1	Ntome_NODE_10539_length_2126_cov_135	RS8_MAIZE^RS8_MAIZE^Q:1306-1854,H:26-208^85.792%ID^E:3.14e-95^RecName: Full=40S ribosomal protein S8;^Eukaryota; Viridiplantae; Streptophyta; Embryophyta; Tracheophyta; Spermatophyta; Magnoliopsida; Liliopsida; Poales; Poaceae; PACMAD clade; Panicoideae; Andropogonodae; Andropogoneae; Tripsacinae; Zea	2.43146	2.05414	0.618267	1.25239	0.640164	0.722913	-6.18747	-5.15633	-7.29076	0.829236	1.22546	0.722412	1.34683	0.827189	0.639101	2.56514	2.75984
1	Ntome_NODE_1054_length_5015_cov_154	ARFR_ORYSJ^ARFR_ORYSJ^Q:2305-413,H:17-692^56.598%ID^E:0^RecName: Full=Auxin response factor 18;^Eukaryota; Viridiplantae; Streptophyta; Embryophyta; Tracheophyta; Spermatophyta; Magnoliopsida; Liliopsida; Poales; Poaceae; BOP clade; Oryzoideae; Oryzeae; Oryzinae; Oryza; Oryza sativa	1.79427	1.91558	0.951035	0.503106	0.519582	0.595422	-6.63685	-5.01862	-5.60829	0.704953	1.0826	0.951035	1.72837	0.986295	1.10022	2.1705	2.26078
1	Ntome_NODE_10541_length_2127_cov_111	E133_ARATH^E133_ARATH^Q:178-1554,H:19-478^71.304%ID^E:0^RecName: Full=Glucan endo-1,3-beta-glucosidase 3;^Eukaryota; Viridiplantae; Streptophyta; Embryophyta; Tracheophyta; Spermatophyta; Magnoliopsida; eudicotyledons; Gunneridae; Pentapetalae; rosids; malvids; Brassicales; Brassicaceae; Camelineae; Arabidopsis	1.30888	1.23121	0.0427293	-0.324177	-0.106434	-0.178483	-3.25771	-1.94981	-2.86613	1.08597	0.526468	-0.310033	-0.0407288	0.897925	-0.571661	1.58846	2.92354
1	Ntome_NODE_10543_length_2126_cov_273	INV1_ARATH^INV1_ARATH^Q:214-1878,H:29-584^56.838%ID^E:0^RecName: Full=Beta-fructofuranosidase, insoluble isoenzyme CWINV1;^Eukaryota; Viridiplantae; Streptophyta; Embryophyta; Tracheophyta; Spermatophyta; Magnoliopsida; eudicotyledons; Gunneridae; Pentapetalae; rosids; malvids; Brassicales; Brassicaceae; Camelineae; Arabidopsis	-0.364971	0.227942	-0.258821	0.106541	0.471933	0.283209	-4.88351	-3.83388	-4.88351	1.65394	0.418081	1.39893	1.01349	1.13219	0.118746	3.21978	4.17989
1	Ntome_NODE_10544_length_2126_cov_269	NU205_ARATH^NU205_ARATH^Q:1-1857,H:1224-1836^62.3%ID^E:0^RecName: Full=Nuclear pore complex protein NUP205 {ECO:0000303|PubMed:21189294};^Eukaryota; Viridiplantae; Streptophyta; Embryophyta; Tracheophyta; Spermatophyta; Magnoliopsida; eudicotyledons; Gunneridae; Pentapetalae; rosids; malvids; Brassicales; Brassicaceae; Camelineae; Arabidopsis	1.08728	0.946364	0.20086	0.512233	-0.320767	-0.0830683	-5.91621	-4.09654	-3.08029	0.968509	0.819582	0.983568	1.3796	0.980908	0.57484	2.03694	3.00619
1	Ntome_NODE_10545_length_2126_cov_258	.	1.88838	1.65392	1.06896	1.44092	1.5962	1.73638	-4.01851	-3.01851	-4.01851	-0.211152	-1.21115	-0.211152	1.50506	0.229421	-0.848582	0.681933	1.73638
1	Ntome_NODE_10546_length_2126_cov_224	PBL19_ARATH^PBL19_ARATH^Q:1656-559,H:1-372^59.894%ID^E:1.25e-146^RecName: Full=Probable serine/threonine-protein kinase PBL19 {ECO:0000305};^Eukaryota; Viridiplantae; Streptophyta; Embryophyta; Tracheophyta; Spermatophyta; Magnoliopsida; eudicotyledons; Gunneridae; Pentapetalae; rosids; malvids; Brassicales; Brassicaceae; Camelineae; Arabidopsis	0.388432	0.129955	0.22248	-1.00712	-1.20134	-0.615177	-2.60318	-1.37398	-3.19054	0.869648	0.303069	0.563021	1.58389	1.43976	0.825079	1.10166	2.56435
1	Ntome_NODE_10547_length_2126_cov_190	GCL2_ARATH^GCL2_ARATH^Q:54-1289,H:1-403^67.718%ID^E:0^RecName: Full=LanC-like protein GCL2;^Eukaryota; Viridiplantae; Streptophyta; Embryophyta; Tracheophyta; Spermatophyta; Magnoliopsida; eudicotyledons; Gunneridae; Pentapetalae; rosids; malvids; Brassicales; Brassicaceae; Camelineae; Arabidopsis	1.29377	1.2138	-0.361812	-0.52506	-0.968196	-0.466115	-2.69754	-1.21769	-3.55644	0.770435	0.686816	0.199436	1.2303	0.572646	0.272849	1.64297	1.90982
1	Ntome_NODE_10548_length_2126_cov_175	RUS3_ARATH^RUS3_ARATH^Q:2071-740,H:1-440^68.09%ID^E:0^RecName: Full=Protein root UVB sensitive 3 {ECO:0000303|PubMed:19515790};^Eukaryota; Viridiplantae; Streptophyta; Embryophyta; Tracheophyta; Spermatophyta; Magnoliopsida; eudicotyledons; Gunneridae; Pentapetalae; rosids; malvids; Brassicales; Brassicaceae; Camelineae; Arabidopsis	1.7233	1.42812	-0.357644	-0.413139	-0.6593	0.376757	-5.11413	-2.61588	-4.07851	1.14871	-0.233938	0.691932	1.6082	0.396195	1.06458	2.14325	2.89149
1	Ntome_NODE_10549_length_2126_cov_161	.	0.52447	0.59662	0.966988	-0.00604493	-0.368615	0.32653	-4.76093	-3.17597	-4.76093	1.02043	0.882924	0.52447	1.86842	1.26144	0.966988	1.88292	2.25029
1	Ntome_NODE_10550_length_2126_cov_133	CALM_LILLO^CALM_LILLO^Q:153-599,H:1-149^100%ID^E:5.4e-98^RecName: Full=Calmodulin;^Eukaryota; Viridiplantae; Streptophyta; Embryophyta; Tracheophyta; Spermatophyta; Magnoliopsida; Liliopsida; Liliales; Liliaceae; Lilium	1.38717	1.123	0.0307214	1.33755	1.13504	1.34639	-5.45105	-5.1779	-6.73707	1.13442	0.934089	0.56832	1.44043	1.10786	0.493923	2.00515	3.32195
1	Ntome_NODE_10551_length_2126_cov_39	OPS_ARATH^OPS_ARATH^Q:1445-1050,H:244-402^43.452%ID^E:4.78e-24^RecName: Full=Protein OCTOPUS {ECO:0000303|PubMed:22395740};^Eukaryota; Viridiplantae; Streptophyta; Embryophyta; Tracheophyta; Spermatophyta; Magnoliopsida; eudicotyledons; Gunneridae; Pentapetalae; rosids; malvids; Brassicales; Brassicaceae; Camelineae; Arabidopsis	2.44304	2.10324	0.509938	1.6219	0.830954	0.601955	-5.32143	-5.32143	-5.32143	0.226696	0.732982	0.000495908	0.828518	1.22253	-0.193799	2.21773	2.81812
1	Ntome_NODE_10554_length_2125_cov_156	.	1.01652	0.934062	0.120815	-0.112014	-0.173953	-0.373335	-3.10473	-4.47418	-2.97206	0.77958	1.0427	0.780949	1.48569	0.895742	0.207563	1.85751	2.08914
1	Ntome_NODE_10556_length_2125_cov_135	.	2.00996	1.09818	0.215179	-0.326295	0.0135612	0.104083	-4.27443	-5.27443	-5.27443	1.10686	0.859587	1.59347	1.93658	1.24442	1.99741	1.26768	1.70262
1	Ntome_NODE_10557_length_2126_cov_113	FQRL1_ARATH^FQRL1_ARATH^Q:1256-1711,H:37-188^92.105%ID^E:2e-82^RecName: Full=Probable NAD(P)H dehydrogenase (quinone) FQR1-like 1 {ECO:0000305};^Eukaryota; Viridiplantae; Streptophyta; Embryophyta; Tracheophyta; Spermatophyta; Magnoliopsida; eudicotyledons; Gunneridae; Pentapetalae; rosids; malvids; Brassicales; Brassicaceae; Camelineae; Arabidopsis	2.89028	2.83631	0.506233	1.30142	1.11887	0.704942	-6.69647	-5.58149	-7.72259	0.976554	1.59296	0.552731	1.33754	0.290427	0.945441	2.61508	2.33177
1	Ntome_NODE_10558_length_2125_cov_46	GGH2_ARATH^GGH2_ARATH^Q:1968-1492,H:43-201^69.811%ID^E:4.01e-72^RecName: Full=Gamma-glutamyl hydrolase 2;^Eukaryota; Viridiplantae; Streptophyta; Embryophyta; Tracheophyta; Spermatophyta; Magnoliopsida; eudicotyledons; Gunneridae; Pentapetalae; rosids; malvids; Brassicales; Brassicaceae; Camelineae; Arabidopsis`GGH2_ARATH^GGH2_ARATH^Q:633-424,H:277-346^62.857%ID^E:1.47e-41^RecName: Full=Gamma-glu…	1.558	0.957603	0.173332	-0.189238	0.00340699	0.462839	-3.99659	-3.99659	-3.99659	0.861388	1.21286	0.00340699	0.861388	0.910298	0.588369	2.09087	2.49526
1	Ntome_NODE_10559_length_2125_cov_43	JASON_ARATH^JASON_ARATH^Q:1984-476,H:1-442^37.698%ID^E:1.54e-63^RecName: Full=Protein JASON {ECO:0000305};^Eukaryota; Viridiplantae; Streptophyta; Embryophyta; Tracheophyta; Spermatophyta; Magnoliopsida; eudicotyledons; Gunneridae; Pentapetalae; rosids; malvids; Brassicales; Brassicaceae; Camelineae; Arabidopsis	0.151509	1.38584	-0.448514	-0.57082	0.655035	0.419258	-3.85286	-1.67228	-4.57532	1.29751	1.43725	0.928345	1.24256	1.44993	0.663465	0.370941	1.11817
1	Ntome_NODE_1056_length_5012_cov_209	KCS1_ARATH^KCS1_ARATH^Q:2972-4540,H:6-526^74.57%ID^E:0^RecName: Full=3-ketoacyl-CoA synthase 1 {ECO:0000303|PubMed:10074711};^Eukaryota; Viridiplantae; Streptophyta; Embryophyta; Tracheophyta; Spermatophyta; Magnoliopsida; eudicotyledons; Gunneridae; Pentapetalae; rosids; malvids; Brassicales; Brassicaceae; Camelineae; Arabidopsis	2.75609	2.42936	2.20203	0.9778	0.0593518	0.807668	-6.91814	-8.02917	-8.02917	1.37501	1.40166	1.3032	2.15084	1.87629	1.73013	1.64855	2.25851
1	Ntome_NODE_10560_length_2124_cov_293	COPD_ARATH^COPD_ARATH^Q:1930-341,H:1-527^71.805%ID^E:0^RecName: Full=Coatomer subunit delta;^Eukaryota; Viridiplantae; Streptophyta; Embryophyta; Tracheophyta; Spermatophyta; Magnoliopsida; eudicotyledons; Gunneridae; Pentapetalae; rosids; malvids; Brassicales; Brassicaceae; Camelineae; Arabidopsis	0.778301	0.819336	-0.136887	-0.00780142	-0.360144	0.101528	-3.16759	-1.2315	-3.3811	0.764641	0.386479	0.0034301	0.953174	0.673087	0.174598	1.27057	2.35987
1	Ntome_NODE_10562_length_2124_cov_263	REM17_ARATH^REM17_ARATH^Q:2118-433,H:34-533^23.841%ID^E:9.69e-31^RecName: Full=B3 domain-containing protein REM17;^Eukaryota; Viridiplantae; Streptophyta; Embryophyta; Tracheophyta; Spermatophyta; Magnoliopsida; eudicotyledons; Gunneridae; Pentapetalae; rosids; malvids; Brassicales; Brassicaceae; Camelineae; Arabidopsis`REM17_ARATH^REM17_ARATH^Q:2031-418,H:317-839^22.625%ID^E:1.35e-18^RecName: Fu…	1.61989	1.7182	0.0327361	0.639099	0.193569	0.454606	-3.35644	-2.49865	-3.9115	0.579221	0.215512	0.17717	0.976181	0.230406	-0.0928696	1.1024	1.92047
1	Ntome_NODE_10564_length_2124_cov_237	CTF64_ARATH^CTF64_ARATH^Q:1968-1282,H:1-234^65.823%ID^E:1.42e-90^RecName: Full=Cleavage stimulating factor 64 {ECO:0000303|PubMed:12379796};^Eukaryota; Viridiplantae; Streptophyta; Embryophyta; Tracheophyta; Spermatophyta; Magnoliopsida; eudicotyledons; Gunneridae; Pentapetalae; rosids; malvids; Brassicales; Brassicaceae; Camelineae; Arabidopsis	0.758118	0.695711	-0.982688	0.946781	-0.129215	0.950639	-4.85858	-3.48329	-3.82415	1.24184	0.66498	0.334771	1.40485	0.911711	0.862617	1.90557	2.60034
1	Ntome_NODE_10565_length_2124_cov_201	PRT1_ARATH^PRT1_ARATH^Q:1-981,H:82-408^40.816%ID^E:1.04e-60^RecName: Full=E3 ubiquitin-protein ligase PRT1;^Eukaryota; Viridiplantae; Streptophyta; Embryophyta; Tracheophyta; Spermatophyta; Magnoliopsida; eudicotyledons; Gunneridae; Pentapetalae; rosids; malvids; Brassicales; Brassicaceae; Camelineae; Arabidopsis	1.80175	1.61087	0.239507	0.493422	0.247643	0.51806	-5.83067	-5.83067	-4.69974	1.38782	1.0673	0.969067	1.05966	1.56234	0.785954	2.20457	2.41312
1	Ntome_NODE_10566_length_2124_cov_179	ERGI3_DICDI^ERGI3_DICDI^Q:1907-1179,H:6-281^34.173%ID^E:6.36e-36^RecName: Full=Probable endoplasmic reticulum-Golgi intermediate compartment protein 3;^Eukaryota; Amoebozoa; Mycetozoa; Dictyostelids; Dictyosteliales; Dictyosteliaceae; Dictyostelium	2.00984	1.96858	0.563745	0.390946	0.611404	-0.162772	-6.0832	-5.96178	-5.07618	1.58407	1.27379	0.943595	1.15515	1.53856	1.54252	1.6252	2.07654
1	Ntome_NODE_10567_length_2124_cov_161	RVE8_ARATH^RVE8_ARATH^Q:1325-1438,H:212-249^86.842%ID^E:2.83e-14^RecName: Full=Protein REVEILLE 8;^Eukaryota; Viridiplantae; Streptophyta; Embryophyta; Tracheophyta; Spermatophyta; Magnoliopsida; eudicotyledons; Gunneridae; Pentapetalae; rosids; malvids; Brassicales; Brassicaceae; Camelineae; Arabidopsis	1.01823	-0.0203962	-0.209591	0.113649	-0.0851548	-1.29755	-3.66771	-2.66771	-1.64979	0.672139	0.330485	0.254487	1.70698	0.27902	1.8798	1.48569	1.85742
1	Ntome_NODE_10568_length_2124_cov_158	RGS1_ARATH^RGS1_ARATH^Q:6-818,H:190-457^61.765%ID^E:5.69e-113^RecName: Full=Regulator of G-protein signaling 1;^Eukaryota; Viridiplantae; Streptophyta; Embryophyta; Tracheophyta; Spermatophyta; Magnoliopsida; eudicotyledons; Gunneridae; Pentapetalae; rosids; malvids; Brassicales; Brassicaceae; Camelineae; Arabidopsis	1.43737	1.28105	0.0221438	0.178994	-0.128882	-0.0585165	-4.46827	-3.34103	-5.53457	0.880355	0.867998	0.506682	1.80779	1.59497	1.13701	1.91051	1.9064
1	Ntome_NODE_10569_length_2124_cov_86	PR1A3_ARATH^PR1A3_ARATH^Q:1263-1613,H:93-209^69.231%ID^E:7.23e-40^RecName: Full=PRA1 family protein A3;^Eukaryota; Viridiplantae; Streptophyta; Embryophyta; Tracheophyta; Spermatophyta; Magnoliopsida; eudicotyledons; Gunneridae; Pentapetalae; rosids; malvids; Brassicales; Brassicaceae; Camelineae; Arabidopsis	1.43477	0.51611	0.603853	-0.282279	-0.171623	-0.380304	-4.25313	-2.22456	-4.25313	1.11773	0.521918	0.475332	0.917193	1.27137	0.640715	1.89661	2.16944
1	Ntome_NODE_1057_length_5011_cov_72	ADF2_PETHY^ADF2_PETHY^Q:1871-1503,H:2-131^88.462%ID^E:1.19e-69^RecName: Full=Actin-depolymerizing factor 2;^Eukaryota; Viridiplantae; Streptophyta; Embryophyta; Tracheophyta; Spermatophyta; Magnoliopsida; eudicotyledons; Gunneridae; Pentapetalae; asterids; lamiids; Solanales; Solanaceae; Petunioideae; Petunia	1.03743	1.24013	0.36656	-0.0330922	-0.0189857	0.637551	-2.38914	-1.80565	-2.30271	-0.85074	-0.956345	-1.09116	1.42167	0.333791	-0.0731636	2.20837	2.2755
1	Ntome_NODE_10570_length_2124_cov_80	AGDP1_ARATH^AGDP1_ARATH^Q:1804-815,H:35-367^42.733%ID^E:1.26e-70^RecName: Full=Protein AGENET DOMAIN (AGD)-CONTAINING P1 {ECO:0000303|PubMed:30382101};^Eukaryota; Viridiplantae; Streptophyta; Embryophyta; Tracheophyta; Spermatophyta; Magnoliopsida; eudicotyledons; Gunneridae; Pentapetalae; rosids; malvids; Brassicales; Brassicaceae; Camelineae; Arabidopsis`AGDP1_ARATH^AGDP1_ARATH^Q:1807-845,H:216…	1.02988	0.659896	-0.307054	0.029876	-0.739794	-0.0737519	-2.8245	-2.24314	-3.82811	0.663748	0.872335	0.663427	1.05503	0.564556	0.126091	2.02988	2.32164
1	Ntome_NODE_10572_length_2124_cov_37	.	2.6439	1.48343	0.565897	1.20333	-0.2821	-1.01907	-2.60403	-2.60403	-2.60403	0.203327	0.855404	-0.2821	-0.2821	-1.60403	-0.604028	3.01068	1.91953
1	Ntome_NODE_10574_length_2123_cov_158	PPOE_SOLLC^PPOE_SOLLC^Q:1907-132,H:8-587^72.896%ID^E:0^RecName: Full=Polyphenol oxidase E, chloroplastic;^Eukaryota; Viridiplantae; Streptophyta; Embryophyta; Tracheophyta; Spermatophyta; Magnoliopsida; eudicotyledons; Gunneridae; Pentapetalae; asterids; lamiids; Solanales; Solanaceae; Solanoideae; Solaneae; Solanum; Lycopersicon	3.80559	3.5409	1.7372	0.526728	-0.0751717	-0.0275652	-7.12155	-5.76043	-7.73779	1.12901	2.10961	-0.0881897	1.80071	1.84561	0.17594	1.28237	2.85702
1	Ntome_NODE_10576_length_2123_cov_131	Y4320_ARATH^Y4320_ARATH^Q:1817-1629,H:56-116^69.841%ID^E:9.24e-21^RecName: Full=Uncharacterized protein At4g13200, chloroplastic;^Eukaryota; Viridiplantae; Streptophyta; Embryophyta; Tracheophyta; Spermatophyta; Magnoliopsida; eudicotyledons; Gunneridae; Pentapetalae; rosids; malvids; Brassicales; Brassicaceae; Camelineae; Arabidopsis	2.19921	2.18649	1.23222	1.12479	0.401808	1.21192	-4.93857	-5.52834	-6.52834	0.618664	-0.0675949	0.0162407	1.44734	0.366723	-0.205868	2.89665	3.56666
1	Ntome_NODE_10577_length_2122_cov_276	LCB2A_ARATH^LCB2A_ARATH^Q:346-1812,H:1-489^86.708%ID^E:0^RecName: Full=Long chain base biosynthesis protein 2a;^Eukaryota; Viridiplantae; Streptophyta; Embryophyta; Tracheophyta; Spermatophyta; Magnoliopsida; eudicotyledons; Gunneridae; Pentapetalae; rosids; malvids; Brassicales; Brassicaceae; Camelineae; Arabidopsis	1.07609	0.943383	-0.536784	1.16152	0.87376	1.15318	-5.55156	-8.30431	-4.64552	1.72976	1.34148	1.27006	1.82783	1.41438	1.09093	2.47295	2.68285
1	Ntome_NODE_10578_length_2122_cov_273	PAO4_ARATH^PAO4_ARATH^Q:451-1917,H:2-497^68.209%ID^E:0^RecName: Full=Probable polyamine oxidase 4 {ECO:0000303|PubMed:18703589};^Eukaryota; Viridiplantae; Streptophyta; Embryophyta; Tracheophyta; Spermatophyta; Magnoliopsida; eudicotyledons; Gunneridae; Pentapetalae; rosids; malvids; Brassicales; Brassicaceae; Camelineae; Arabidopsis	2.04603	1.43375	0.526441	0.492251	-0.246795	0.45723	-2.88546	-5.67205	-4.08709	0.709923	0.788526	0.400053	1.58156	1.34063	0.296268	1.23339	1.58534
1	Ntome_NODE_10579_length_2122_cov_246	ATAD1_XENTR^ATAD1_XENTR^Q:1800-868,H:41-351^46.624%ID^E:4.69e-94^RecName: Full=ATPase family AAA domain-containing protein 1;^Eukaryota; Metazoa; Chordata; Craniata; Vertebrata; Euteleostomi; Amphibia; Batrachia; Anura; Pipoidea; Pipidae; Xenopodinae; Xenopus; Silurana	2.11958	1.77544	0.257177	0.686845	0.207936	0.236851	-6.25836	-6.25836	-6.25836	1.13875	0.93304	1.19359	1.89989	1.53469	1.30212	2.68415	2.80503
1	Ntome_NODE_1058_length_5010_cov_303	TC159_ARATH^TC159_ARATH^Q:2164-4734,H:639-1503^69.053%ID^E:0^RecName: Full=Translocase of chloroplast 159, chloroplastic;^Eukaryota; Viridiplantae; Streptophyta; Embryophyta; Tracheophyta; Spermatophyta; Magnoliopsida; eudicotyledons; Gunneridae; Pentapetalae; rosids; malvids; Brassicales; Brassicaceae; Camelineae; Arabidopsis	1.02198	1.41744	0.60181	-0.106222	-0.109984	-0.265206	-4.83938	-4.2844	-4.8026	1.6045	1.17824	1.10875	0.95471	1.22575	0.957589	1.98687	2.35015
1	Ntome_NODE_10581_length_2121_cov_222	CB4A_SOLLC^CB4A_SOLLC^Q:16-687,H:34-256^94.643%ID^E:9.68e-146^RecName: Full=Chlorophyll a-b binding protein CP24 10A, chloroplastic;^Eukaryota; Viridiplantae; Streptophyta; Embryophyta; Tracheophyta; Spermatophyta; Magnoliopsida; eudicotyledons; Gunneridae; Pentapetalae; asterids; lamiids; Solanales; Solanaceae; Solanoideae; Solaneae; Solanum; Lycopersicon	0.305441	0.287448	-1.12317	0.447342	-0.0609883	0.241749	-4.21639	-5.15926	-6.46894	2.05066	1.46057	1.4305	1.65801	1.09247	0.311122	3.58166	4.16177
1	Ntome_NODE_10582_length_2122_cov_170	.	1.46909	0.723249	-0.510756	0.0281624	0.0152825	-0.500369	-4.47419	-2.23778	-4.11739	0.993479	1.44962	0.821559	1.45161	0.86203	1.211	1.80227	1.01312
1	Ntome_NODE_10583_length_2122_cov_162	.	2.06917	1.53284	0.772498	0.586425	0.69895	0.70321	-5.05887	-5.05887	-5.05887	0.140407	0.83206	0.000309136	1.19606	1.09392	0.756446	1.92981	2.86451
1	Ntome_NODE_10584_length_2122_cov_162	ARL5_DICDI^ARL5_DICDI^Q:1223-1753,H:1-180^60%ID^E:3.16e-72^RecName: Full=ADP-ribosylation factor-like protein 5;^Eukaryota; Amoebozoa; Mycetozoa; Dictyostelids; Dictyosteliales; Dictyosteliaceae; Dictyostelium	2.91073	2.71629	0.583911	1.38295	1.21336	0.636477	-6.08635	-4.44197	-5.57698	0.529358	0.624181	0.20305	0.63543	0.263577	0.602046	1.71467	2.08928
1	Ntome_NODE_10585_length_2122_cov_134	MGDP1_HUMAN^MGDP1_HUMAN^Q:677-468,H:83-159^40.26%ID^E:2.05e-12^RecName: Full=Magnesium-dependent phosphatase 1;^Eukaryota; Metazoa; Chordata; Craniata; Vertebrata; Euteleostomi; Mammalia; Eutheria; Euarchontoglires; Primates; Haplorrhini; Catarrhini; Hominidae; Homo`MGDP1_HUMAN^MGDP1_HUMAN^Q:1994-1761,H:4-96^33.333%ID^E:1.7e-07^RecName: Full=Magnesium-dependent phosphatase 1;^Eukaryota; Metazoa; …	1.38025	1.16161	-1.17819	0.95701	0.829053	-0.0122285	-2.92514	-3.64394	-4.9527	1.16197	1.51418	0.962174	-1.30117	1.13493	1.42902	2.02778	1.45539
1	Ntome_NODE_10586_length_2122_cov_97	ADAL_DANRE^ADAL_DANRE^Q:693-1712,H:7-339^38.251%ID^E:1.46e-64^RecName: Full=Adenosine deaminase-like protein;^Eukaryota; Metazoa; Chordata; Craniata; Vertebrata; Euteleostomi; Actinopterygii; Neopterygii; Teleostei; Ostariophysi; Cypriniformes; Cyprinidae; Danio	3.52129	2.75897	1.04635	0.43929	0.0935271	-0.6334	-6.55393	-6.55393	-6.55393	1.57839	2.58026	1.19835	0.631836	1.17684	0.637671	2.24687	2.38553
1	Ntome_NODE_10587_length_2122_cov_56	GCP2_ARATH^GCP2_ARATH^Q:2090-117,H:55-705^57.791%ID^E:0^RecName: Full=Probable glutamate carboxypeptidase AMP1 {ECO:0000305};^Eukaryota; Viridiplantae; Streptophyta; Embryophyta; Tracheophyta; Spermatophyta; Magnoliopsida; eudicotyledons; Gunneridae; Pentapetalae; rosids; malvids; Brassicales; Brassicaceae; Camelineae; Arabidopsis	2.69098	3.09837	1.23819	1.45166	0.370165	0.690706	-3.00973	-3.00973	-3.00973	-1.42477	-2.00973	-3.00973	0.549758	1.75102	0.312194	1.74515	1.57523
1	Ntome_NODE_10589_length_2121_cov_251	NU50B_ARATH^NU50B_ARATH^Q:869-1597,H:225-460^58.333%ID^E:8.69e-77^RecName: Full=Nuclear pore complex protein NUP50B {ECO:0000303|PubMed:21189294};^Eukaryota; Viridiplantae; Streptophyta; Embryophyta; Tracheophyta; Spermatophyta; Magnoliopsida; eudicotyledons; Gunneridae; Pentapetalae; rosids; malvids; Brassicales; Brassicaceae; Camelineae; Arabidopsis`NU50B_ARATH^NU50B_ARATH^Q:245-478,H:1-81^61.7…	1.67768	1.50168	0.681238	0.477737	0.357176	0.798142	-6.98374	-5.36081	-5.92716	1.30429	1.09771	0.990844	1.61914	1.51881	0.98895	2.45089	2.80742
1	Ntome_NODE_1059_length_5009_cov_156	SNX2B_ARATH^SNX2B_ARATH^Q:323-1918,H:1-559^61.404%ID^E:0^RecName: Full=Sorting nexin 2B;^Eukaryota; Viridiplantae; Streptophyta; Embryophyta; Tracheophyta; Spermatophyta; Magnoliopsida; eudicotyledons; Gunneridae; Pentapetalae; rosids; malvids; Brassicales; Brassicaceae; Camelineae; Arabidopsis	0.777365	0.690255	-0.974229	0.633083	0.395761	0.0387848	-5.30376	-4.35236	-5.30376	1.56259	1.4005	1.18257	1.69906	1.47621	1.70374	2.34161	2.03256
1	Ntome_NODE_10590_length_2121_cov_248	LSF2_ARATH^LSF2_ARATH^Q:112-888,H:26-282^73.359%ID^E:6.66e-133^RecName: Full=Phosphoglucan phosphatase LSF2, chloroplastic;^Eukaryota; Viridiplantae; Streptophyta; Embryophyta; Tracheophyta; Spermatophyta; Magnoliopsida; eudicotyledons; Gunneridae; Pentapetalae; rosids; malvids; Brassicales; Brassicaceae; Camelineae; Arabidopsis	0.586287	0.667268	-0.0887056	0.540025	-0.251944	1.26278	-5.46578	-5.52807	-5.50005	1.17489	0.728673	1.34314	2.18567	1.5546	1.19852	2.26673	3.32598
1	Ntome_NODE_10591_length_2121_cov_239	D89S2_ARATH^D89S2_ARATH^Q:104-1204,H:1-367^83.924%ID^E:0^RecName: Full=Damage-control phosphatase At2g17340 {ECO:0000303|PubMed:27322068};^Eukaryota; Viridiplantae; Streptophyta; Embryophyta; Tracheophyta; Spermatophyta; Magnoliopsida; eudicotyledons; Gunneridae; Pentapetalae; rosids; malvids; Brassicales; Brassicaceae; Camelineae; Arabidopsis	1.18044	1.38577	0.181679	-0.596233	-0.853311	-0.0791548	-2.77471	-2.02439	-3.16907	0.453105	0.398785	0.202833	1.16845	0.623765	0.388256	1.42252	2.09127
1	Ntome_NODE_10592_length_2121_cov_200	LAC4_ARATH^LAC4_ARATH^Q:2000-393,H:7-543^77.695%ID^E:0^RecName: Full=Laccase-4;^Eukaryota; Viridiplantae; Streptophyta; Embryophyta; Tracheophyta; Spermatophyta; Magnoliopsida; eudicotyledons; Gunneridae; Pentapetalae; rosids; malvids; Brassicales; Brassicaceae; Camelineae; Arabidopsis	-0.668174	0.683531	-0.285056	0.743661	1.6819	2.21424	-6.91873	-8.95787	-7.49844	2.85434	2.49205	2.38001	2.81721	2.13204	1.81694	2.62003	1.89232
1	Ntome_NODE_10593_length_2121_cov_178	MCMBP_ARATH^MCMBP_ARATH^Q:149-1900,H:1-577^57.509%ID^E:0^RecName: Full=Mini-chromosome maintenance complex-binding protein;^Eukaryota; Viridiplantae; Streptophyta; Embryophyta; Tracheophyta; Spermatophyta; Magnoliopsida; eudicotyledons; Gunneridae; Pentapetalae; rosids; malvids; Brassicales; Brassicaceae; Camelineae; Arabidopsis	0.0948918	1.11207	-0.509857	0.757464	1.72937	1.40553	-4.31721	-4.31721	-4.31721	-0.278074	0.964486	1.00508	1.74694	0.806288	0.852312	0.779134	2.48601
1	Ntome_NODE_10594_length_2121_cov_162	GALS3_ARATH^GALS3_ARATH^Q:1777-296,H:12-504^59.684%ID^E:0^RecName: Full=Galactan beta-1,4-galactosyltransferase GALS3 {ECO:0000305};^Eukaryota; Viridiplantae; Streptophyta; Embryophyta; Tracheophyta; Spermatophyta; Magnoliopsida; eudicotyledons; Gunneridae; Pentapetalae; rosids; malvids; Brassicales; Brassicaceae; Camelineae; Arabidopsis	1.63349	1.00686	0.228306	0.991534	0.357363	0.0998929	-3.36823	-3.61084	-3.76882	0.52129	0.710677	-0.676943	1.69145	1.10699	0.976131	0.484693	1.61615
1	Ntome_NODE_10595_length_2121_cov_93	SNAG_ARATH^SNAG_ARATH^Q:648-469,H:219-278^65%ID^E:4.79e-18^RecName: Full=Gamma-soluble NSF attachment protein;^Eukaryota; Viridiplantae; Streptophyta; Embryophyta; Tracheophyta; Spermatophyta; Magnoliopsida; eudicotyledons; Gunneridae; Pentapetalae; rosids; malvids; Brassicales; Brassicaceae; Camelineae; Arabidopsis	1.77916	1.80558	0.357236	0.480177	0.387825	0.842074	-6.35701	-5.35701	-5.35701	1.046	0.84766	0.651083	1.80337	1.45542	0.965009	1.94215	2.70827
1	Ntome_NODE_10597_length_2121_cov_17	PP380_ARATH^PP380_ARATH^Q:41-1933,H:2-632^48.815%ID^E:0^RecName: Full=Pentatricopeptide repeat-containing protein At5g14080;^Eukaryota; Viridiplantae; Streptophyta; Embryophyta; Tracheophyta; Spermatophyta; Magnoliopsida; eudicotyledons; Gunneridae; Pentapetalae; rosids; malvids; Brassicales; Brassicaceae; Camelineae; Arabidopsis	1.11203	1.35171	1.79011	-0.505827	-0.392829	-1.4552	-3.66933	-3.66933	-3.66933	1.20989	1.17717	0.821886	0.361011	1.56142	-0.768217	2.28487	2.45996
1	Ntome_NODE_10598_length_2120_cov_258	ASP63_ARATH^ASP63_ARATH^Q:406-1689,H:62-498^59.732%ID^E:2.74e-152^RecName: Full=Probable aspartyl protease At4g16563 {ECO:0000305};^Eukaryota; Viridiplantae; Streptophyta; Embryophyta; Tracheophyta; Spermatophyta; Magnoliopsida; eudicotyledons; Gunneridae; Pentapetalae; rosids; malvids; Brassicales; Brassicaceae; Camelineae; Arabidopsis	0.844092	2.14554	1.47081	1.03222	2.03432	1.48576	-5.44021	-6.4474	-6.4474	1.78981	1.30434	0.110101	1.41796	3.06922	2.77812	-0.0218078	-1.12547
1	Ntome_NODE_10599_length_2120_cov_235	GFT1_ARATH^GFT1_ARATH^Q:734-1780,H:1-340^71.225%ID^E:6.71e-170^RecName: Full=GDP-fucose transporter 1 {ECO:0000303|PubMed:27381418};^Eukaryota; Viridiplantae; Streptophyta; Embryophyta; Tracheophyta; Spermatophyta; Magnoliopsida; eudicotyledons; Gunneridae; Pentapetalae; rosids; malvids; Brassicales; Brassicaceae; Camelineae; Arabidopsis	2.37443	2.08737	1.57807	0.92832	0.298019	0.837538	-6.47162	-5.436	-5.44305	0.888656	0.732755	0.643476	1.17526	0.810727	0.246468	1.93348	2.81609
1	Ntome_NODE_106_length_8402_cov_102	RCD1_ARATH^RCD1_ARATH^Q:8005-6626,H:73-567^27.308%ID^E:7.99e-48^RecName: Full=Inactive poly [ADP-ribose] polymerase RCD1;^Eukaryota; Viridiplantae; Streptophyta; Embryophyta; Tracheophyta; Spermatophyta; Magnoliopsida; eudicotyledons; Gunneridae; Pentapetalae; rosids; malvids; Brassicales; Brassicaceae; Camelineae; Arabidopsis	1.50903	1.48911	0.411143	0.166628	-0.493208	0.193912	-7.38827	-3.93278	-4.89513	1.52267	1.16897	1.116	2.14019	1.11433	1.39391	2.27351	2.20999
1	Ntome_NODE_1060_length_5008_cov_45	.	1.63131	1.61844	0.425187	0.40617	0.0193386	0.717069	-6.29427	-6.29427	-6.29427	2.0305	1.17789	1.7534	2.21416	1.29542	0.553977	2.0714	2.96855
1	Ntome_NODE_10600_length_2120_cov_231	UTR3_ARATH^UTR3_ARATH^Q:1932-943,H:1-330^87.576%ID^E:0^RecName: Full=UDP-galactose/UDP-glucose transporter 3 {ECO:0000303|PubMed:12042319};^Eukaryota; Viridiplantae; Streptophyta; Embryophyta; Tracheophyta; Spermatophyta; Magnoliopsida; eudicotyledons; Gunneridae; Pentapetalae; rosids; malvids; Brassicales; Brassicaceae; Camelineae; Arabidopsis	1.61553	1.24727	-0.588985	1.36693	0.629431	0.800705	-5.48452	-6.51308	-4.89485	1.56255	0.805503	1.16604	1.27482	0.976201	1.02491	2.1622	2.84934
1	Ntome_NODE_10602_length_2120_cov_9	.	-0.18418	0.647145	-0.00317958	-0.171501	0.413462	-1.58654	-3.1715	-2.08744	-2.1715	0.833001	0.21393	-0.364146	1.41045	1.18182	-0.325509	2.84285	2.52282
1	Ntome_NODE_10603_length_2119_cov_267	C3H69_ARATH^C3H69_ARATH^Q:106-1161,H:1-350^65.73%ID^E:8.77e-157^RecName: Full=Putative RING-type E3 ubiquitin transferase C3H69 {ECO:0000305};^Eukaryota; Viridiplantae; Streptophyta; Embryophyta; Tracheophyta; Spermatophyta; Magnoliopsida; eudicotyledons; Gunneridae; Pentapetalae; rosids; malvids; Brassicales; Brassicaceae; Camelineae; Arabidopsis	2.36272	2.60911	0.836123	0.673944	0.329182	0.612302	-5.45706	-5.46414	-6.48562	0.944075	0.775154	0.495771	1.51014	1.10907	0.981329	1.73944	2.42846
1	Ntome_NODE_10604_length_2119_cov_253	FBK8_ARATH^FBK8_ARATH^Q:303-1718,H:1-475^60.543%ID^E:0^RecName: Full=F-box/kelch-repeat protein At1g22040;^Eukaryota; Viridiplantae; Streptophyta; Embryophyta; Tracheophyta; Spermatophyta; Magnoliopsida; eudicotyledons; Gunneridae; Pentapetalae; rosids; malvids; Brassicales; Brassicaceae; Camelineae; Arabidopsis	1.0786	0.976354	-0.528004	0.682158	0.617406	0.726677	-3.33413	-4.33757	-4.30362	1.09356	1.02459	1.16963	0.726677	0.558868	0.445292	1.42272	1.98079
1	Ntome_NODE_10605_length_2119_cov_216	HIP6_ARATH^HIP6_ARATH^Q:1319-1119,H:154-220^65.672%ID^E:4.01e-19^RecName: Full=Heavy metal-associated isoprenylated plant protein 6 {ECO:0000303|PubMed:21072340, ECO:0000303|PubMed:23368984};^Eukaryota; Viridiplantae; Streptophyta; Embryophyta; Tracheophyta; Spermatophyta; Magnoliopsida; eudicotyledons; Gunneridae; Pentapetalae; rosids; malvids; Brassicales; Brassicaceae; Camelineae; Arabidopsis`…	2.46153	1.59079	1.92623	1.23876	0.954916	1.43119	-4.72612	-3.34938	-3.35049	-1.38049	-0.376388	-0.822692	0.730164	-1.40823	1.69662	1.90326	1.48033
1	Ntome_NODE_10606_length_2119_cov_196	B2_DAUCA^B2_DAUCA^Q:697-960,H:55-138^77.273%ID^E:4.21e-40^RecName: Full=B2 protein;^Eukaryota; Viridiplantae; Streptophyta; Embryophyta; Tracheophyta; Spermatophyta; Magnoliopsida; eudicotyledons; Gunneridae; Pentapetalae; asterids; campanulids; Apiales; Apiaceae; Apioideae; Scandiceae; Daucinae; Daucus; Daucus sect. Daucus`B2_DAUCA^B2_DAUCA^Q:1448-1678,H:129-205^71.429%ID^E:1.57e-33^RecName: Ful…	1.98197	1.76839	0.100107	-0.357535	-0.273418	0.0458142	-4.58428	-5.26027	-7.05936	1.42856	0.973291	1.12621	2.37458	1.785	1.65512	1.70766	2.58815
1	Ntome_NODE_10607_length_2119_cov_155	PCRK1_ARATH^PCRK1_ARATH^Q:1761-493,H:1-418^68.31%ID^E:0^RecName: Full=Serine/threonine-protein kinase PCRK1 {ECO:0000305};^Eukaryota; Viridiplantae; Streptophyta; Embryophyta; Tracheophyta; Spermatophyta; Magnoliopsida; eudicotyledons; Gunneridae; Pentapetalae; rosids; malvids; Brassicales; Brassicaceae; Camelineae; Arabidopsis	1.69313	1.05086	0.658386	0.756111	0.284442	0.428027	-5.41822	-5.41822	-5.41822	0.765668	0.547338	0.522421	1.58864	1.13959	0.786942	3.33637	2.69672
1	Ntome_NODE_10608_length_2119_cov_143	TYDC1_PAPSO^TYDC1_PAPSO^Q:268-1779,H:1-510^67.906%ID^E:0^RecName: Full=Tyrosine/DOPA decarboxylase 1;^Eukaryota; Viridiplantae; Streptophyta; Embryophyta; Tracheophyta; Spermatophyta; Magnoliopsida; Ranunculales; Papaveraceae; Papaveroideae; Papaver	1.78819	1.42277	-0.0893133	0.288855	-0.41273	0.222247	-5.02997	-6.17402	-6.17402	1.58201	0.691285	1.56448	2.1315	2.23847	1.58501	1.41844	2.94679
1	Ntome_NODE_10609_length_2119_cov_132	.	0.918886	0.959528	0.833998	0.877066	0.037531	0.696494	-4.2104	-3.2104	-4.2104	0.249035	0.596958	0.696494	1.81197	0.833998	1.40431	1.28146	0.43346
1	Ntome_NODE_1061_length_5006_cov_185	GOGC1_ARATH^GOGC1_ARATH^Q:4509-2824,H:1-552^53.704%ID^E:3.28e-138^RecName: Full=Golgin candidate 1;^Eukaryota; Viridiplantae; Streptophyta; Embryophyta; Tracheophyta; Spermatophyta; Magnoliopsida; eudicotyledons; Gunneridae; Pentapetalae; rosids; malvids; Brassicales; Brassicaceae; Camelineae; Arabidopsis`GOGC1_ARATH^GOGC1_ARATH^Q:319-2,H:553-658^78.302%ID^E:1.37e-33^RecName: Full=Golgin candidat…	1.11992	1.2391	0.462135	0.472202	0.686794	0.952091	-5.5783	-5.25993	-5.85206	1.53049	1.22471	0.924925	1.48082	1.02461	0.646163	2.30196	2.62438
1	Ntome_NODE_10610_length_2118_cov_283	MPPB_ARATH^MPPB_ARATH^Q:69-1661,H:1-531^72.316%ID^E:0^RecName: Full=Probable mitochondrial-processing peptidase subunit beta, mitochondrial;^Eukaryota; Viridiplantae; Streptophyta; Embryophyta; Tracheophyta; Spermatophyta; Magnoliopsida; eudicotyledons; Gunneridae; Pentapetalae; rosids; malvids; Brassicales; Brassicaceae; Camelineae; Arabidopsis	1.87336	1.70954	0.0870998	0.515993	0.104407	0.303669	-3.07959	-4.08992	-3.88807	-0.0573592	-0.186781	-0.64497	1.40437	1.35659	1.15614	1.48815	1.94738
1	Ntome_NODE_10611_length_2118_cov_214	FBW2_ARATH^FBW2_ARATH^Q:1258-284,H:1-317^53.03%ID^E:3.38e-98^RecName: Full=F-box protein FBW2;^Eukaryota; Viridiplantae; Streptophyta; Embryophyta; Tracheophyta; Spermatophyta; Magnoliopsida; eudicotyledons; Gunneridae; Pentapetalae; rosids; malvids; Brassicales; Brassicaceae; Camelineae; Arabidopsis	1.66897	1.55944	-0.212976	0.513236	0.176341	0.77183	-4.46052	-2.89262	-4.75367	0.544014	0.790368	0.00550264	0.852019	0.569708	-0.681476	2.55034	2.99949
1	Ntome_NODE_10612_length_2118_cov_115	ARR17_ARATH^ARR17_ARATH^Q:712-284,H:8-152^73.103%ID^E:7.65e-55^RecName: Full=Two-component response regulator ARR17;^Eukaryota; Viridiplantae; Streptophyta; Embryophyta; Tracheophyta; Spermatophyta; Magnoliopsida; eudicotyledons; Gunneridae; Pentapetalae; rosids; malvids; Brassicales; Brassicaceae; Camelineae; Arabidopsis	1.50879	1.43648	0.318275	0.441181	-0.15662	0.702733	-3.47463	-6.42696	-3.64246	1.08598	0.799739	0.396787	0.972294	1.12694	0.918753	1.82461	2.16811
1	Ntome_NODE_10613_length_2118_cov_86	RL25_SPHWW^RL25_SPHWW^Q:168-635,H:5-131^28.205%ID^E:9.24e-06^RecName: Full=50S ribosomal protein L25 {ECO:0000255|HAMAP-Rule:MF_01334};^Bacteria; Proteobacteria; Alphaproteobacteria; Sphingomonadales; Sphingomonadaceae; Sphingomonas	2.15426	1.994	0.370365	1.29294	1.26995	0.421435	-5.64758	-3.63885	-4.65108	0.405913	0.622479	0.215465	0.389156	0.948793	0.0807387	1.62814	2.14387
1	Ntome_NODE_10614_length_2117_cov_292	PDC2_TOBAC^PDC2_TOBAC^Q:2012-249,H:1-614^95.277%ID^E:0^RecName: Full=Pyruvate decarboxylase 2;^Eukaryota; Viridiplantae; Streptophyta; Embryophyta; Tracheophyta; Spermatophyta; Magnoliopsida; eudicotyledons; Gunneridae; Pentapetalae; asterids; lamiids; Solanales; Solanaceae; Nicotianoideae; Nicotianeae; Nicotiana	1.11268	1.63576	0.292405	-1.05242	-0.0742283	-0.052424	-2.05242	-2.05242	-2.05242	1.1445	-1.05242	0.754931	-2.05242	-0.130226	-0.063285	2.70246	2.99197
1	Ntome_NODE_10615_length_2117_cov_277	AP3BA_ARATH^AP3BA_ARATH^Q:1-1827,H:401-983^50.409%ID^E:0^RecName: Full=AP3-complex subunit beta-A;^Eukaryota; Viridiplantae; Streptophyta; Embryophyta; Tracheophyta; Spermatophyta; Magnoliopsida; eudicotyledons; Gunneridae; Pentapetalae; rosids; malvids; Brassicales; Brassicaceae; Camelineae; Arabidopsis	1.79975	1.37931	0.465774	0.340604	-0.300922	0.309965	-4.75103	-6.09586	-6.09586	1.51125	0.810191	0.948864	1.7201	1.4155	1.37207	2.132	3.03829
1	Ntome_NODE_10616_length_2117_cov_275	WRKY2_ARATH^WRKY2_ARATH^Q:1832-564,H:263-685^57.174%ID^E:1.26e-131^RecName: Full=Probable WRKY transcription factor 2 {ECO:0000303|Ref.1};^Eukaryota; Viridiplantae; Streptophyta; Embryophyta; Tracheophyta; Spermatophyta; Magnoliopsida; eudicotyledons; Gunneridae; Pentapetalae; rosids; malvids; Brassicales; Brassicaceae; Camelineae; Arabidopsis	1.97235	1.83457	0.184012	0.673115	0.235643	0.29284	-6.95062	-5.87338	-4.72411	1.4512	1.42146	1.00956	1.54304	1.43598	1.64281	1.9795	1.87205
1	Ntome_NODE_10617_length_2117_cov_118	BOB1_ARATH^BOB1_ARATH^Q:1199-1708,H:135-304^81.765%ID^E:5.21e-96^RecName: Full=Protein BOBBER 1;^Eukaryota; Viridiplantae; Streptophyta; Embryophyta; Tracheophyta; Spermatophyta; Magnoliopsida; eudicotyledons; Gunneridae; Pentapetalae; rosids; malvids; Brassicales; Brassicaceae; Camelineae; Arabidopsis	0.745604	0.782976	0.176659	0.68308	0.213401	0.856223	-6.53841	-5.52406	-5.43407	1.48162	0.935376	1.12565	1.61575	1.28081	1.0194	2.6206	3.95939
1	Ntome_NODE_10619_length_2116_cov_297	FBL78_ARATH^FBL78_ARATH^Q:121-894,H:21-224^27.652%ID^E:3.63e-18^RecName: Full=Putative F-box/LRR-repeat protein At5g02700;^Eukaryota; Viridiplantae; Streptophyta; Embryophyta; Tracheophyta; Spermatophyta; Magnoliopsida; eudicotyledons; Gunneridae; Pentapetalae; rosids; malvids; Brassicales; Brassicaceae; Camelineae; Arabidopsis	0.701831	0.608155	0.26876	-0.0110612	-0.0975784	1.29229	-5.89615	-4.11794	-4.73265	1.28466	0.874814	0.952225	1.90973	1.39064	0.744387	1.97249	2.8554
1	Ntome_NODE_1062_length_5004_cov_276	FH18_ARATH^FH18_ARATH^Q:239-1513,H:1-424^65.882%ID^E:0^RecName: Full=Formin-like protein 18;^Eukaryota; Viridiplantae; Streptophyta; Embryophyta; Tracheophyta; Spermatophyta; Magnoliopsida; eudicotyledons; Gunneridae; Pentapetalae; rosids; malvids; Brassicales; Brassicaceae; Camelineae; Arabidopsis`FH18_ARATH^FH18_ARATH^Q:3428-4621,H:727-1122^69.674%ID^E:2.09e-164^RecName: Full=Formin-like protei…	1.83799	1.3985	0.252172	0.259266	0.411297	0.34675	-6.25179	-5.86068	-5.17779	1.80368	1.20307	0.942014	1.44941	1.49561	1.71564	2.24517	1.92971
1	Ntome_NODE_10620_length_2116_cov_283	FRL3_ARATH^FRL3_ARATH^Q:229-1761,H:1-511^60.87%ID^E:0^RecName: Full=FRIGIDA-like protein 3;^Eukaryota; Viridiplantae; Streptophyta; Embryophyta; Tracheophyta; Spermatophyta; Magnoliopsida; eudicotyledons; Gunneridae; Pentapetalae; rosids; malvids; Brassicales; Brassicaceae; Camelineae; Arabidopsis	1.6368	1.6847	0.553356	0.319985	-0.124468	0.675782	-6.30835	-4.68074	-6.30835	1.39846	0.529844	0.86007	1.7344	1.47071	0.882165	2.21913	3.45652
1	Ntome_NODE_10621_length_2116_cov_273	Y2253_MYCBO^Y2253_MYCBO^Q:1461-1090,H:3-127^44%ID^E:3.28e-14^RecName: Full=Uncharacterized protein Mb2253c;^Bacteria; Actinobacteria; Corynebacteriales; Mycobacteriaceae; Mycobacterium; Mycobacterium tuberculosis complex	1.63029	1.64133	-0.340306	0.251066	-0.416259	-0.428515	-3.13599	-2.31893	-3.15822	0.773905	0.626414	0.494808	0.755756	0.336971	-0.0668959	0.982088	2.37249
1	Ntome_NODE_10622_length_2116_cov_249	ATL54_ARATH^ATL54_ARATH^Q:731-1114,H:139-262^56.25%ID^E:3.16e-36^RecName: Full=RING-H2 finger protein ATL54;^Eukaryota; Viridiplantae; Streptophyta; Embryophyta; Tracheophyta; Spermatophyta; Magnoliopsida; eudicotyledons; Gunneridae; Pentapetalae; rosids; malvids; Brassicales; Brassicaceae; Camelineae; Arabidopsis	-0.154423	1.16751	0.224089	0.713869	1.37315	0.546017	-5.47635	-5.47635	-5.47635	1.94975	0.92111	0.478776	0.694175	0.999545	1.74272	3.32455	2.44822
1	Ntome_NODE_10623_length_2116_cov_163	APO4_ARATH^APO4_ARATH^Q:165-1109,H:7-325^57.053%ID^E:2.04e-123^RecName: Full=APO protein 4, mitochondrial;^Eukaryota; Viridiplantae; Streptophyta; Embryophyta; Tracheophyta; Spermatophyta; Magnoliopsida; eudicotyledons; Gunneridae; Pentapetalae; rosids; malvids; Brassicales; Brassicaceae; Camelineae; Arabidopsis	1.17591	0.539903	-0.057741	-0.137911	-0.808419	-0.179307	-1.93377	-1.65957	-3.24571	0.640177	0.820693	0.460726	0.566202	0.710315	-0.0188873	1.48769	1.6397
1	Ntome_NODE_10624_length_2116_cov_101	GCSH2_ARATH^GCSH2_ARATH^Q:754-1113,H:1-122^72.951%ID^E:5.68e-50^RecName: Full=Glycine cleavage system H protein 2, mitochondrial;^Eukaryota; Viridiplantae; Streptophyta; Embryophyta; Tracheophyta; Spermatophyta; Magnoliopsida; eudicotyledons; Gunneridae; Pentapetalae; rosids; malvids; Brassicales; Brassicaceae; Camelineae; Arabidopsis	1.34091	1.29508	-0.0646574	0.416242	0.600474	0.322108	-6.58994	-5.5473	-6.58994	1.65037	1.76228	1.27164	2.40472	1.52119	1.25096	2.09761	2.85826
1	Ntome_NODE_10625_length_2116_cov_77	RT12_PETPA^RT12_PETPA^Q:571-476,H:49-80^100%ID^E:6.98e-14^RecName: Full=Ribosomal protein S12, mitochondrial;^Eukaryota; Viridiplantae; Streptophyta; Embryophyta; Tracheophyta; Spermatophyta; Magnoliopsida; eudicotyledons; Gunneridae; Pentapetalae; asterids; lamiids; Solanales; Solanaceae; Petunioideae; Petunia	1.13119	0.599343	1.19831	-0.67616	-0.17366	-0.261123	-2.67616	-1.66896	-4.26112	0.781521	0.262439	0.493765	0.693073	0.439317	0.645768	1.4668	2.00566
1	Ntome_NODE_10626_length_2115_cov_176	GLO2C_ARATH^GLO2C_ARATH^Q:1817-1044,H:1-258^74.419%ID^E:9.08e-148^RecName: Full=Hydroxyacylglutathione hydrolase cytoplasmic;^Eukaryota; Viridiplantae; Streptophyta; Embryophyta; Tracheophyta; Spermatophyta; Magnoliopsida; eudicotyledons; Gunneridae; Pentapetalae; rosids; malvids; Brassicales; Brassicaceae; Camelineae; Arabidopsis	2.5712	2.66572	1.00648	1.23623	1.00319	1.15211	-7.63549	-4.96647	-6.57199	0.862796	1.10644	0.370523	1.3421	0.955579	0.627915	1.70896	2.5647
1	Ntome_NODE_10627_length_2115_cov_143	CXE16_ARATH^CXE16_ARATH^Q:1744-308,H:1-446^70.124%ID^E:0^RecName: Full=Probable carboxylesterase 16;^Eukaryota; Viridiplantae; Streptophyta; Embryophyta; Tracheophyta; Spermatophyta; Magnoliopsida; eudicotyledons; Gunneridae; Pentapetalae; rosids; malvids; Brassicales; Brassicaceae; Camelineae; Arabidopsis	1.95094	1.90899	0.264803	0.618362	0.610636	0.732348	-5.33094	-5.33094	-5.33094	0.890358	0.510279	0.58697	0.818401	1.67525	1.21132	1.94519	2.26897
1	Ntome_NODE_1063_length_5004_cov_88	RGAP6_ARATH^RGAP6_ARATH^Q:2637-3059,H:52-195^67.361%ID^E:7.99e-38^RecName: Full=Rho GTPase-activating protein 6;^Eukaryota; Viridiplantae; Streptophyta; Embryophyta; Tracheophyta; Spermatophyta; Magnoliopsida; eudicotyledons; Gunneridae; Pentapetalae; rosids; malvids; Brassicales; Brassicaceae; Camelineae; Arabidopsis`RGAP6_ARATH^RGAP6_ARATH^Q:3508-4143,H:538-749^35.814%ID^E:1.97e-19^RecName: Ful…	1.08326	1.29476	0.389504	-0.400862	-1.01741	0.40223	-4.30871	-2.72375	-4.30871	1.39145	0.896835	-0.0630664	0.508909	0.380585	0.400025	2.73808	3.33687
1	Ntome_NODE_10630_length_2115_cov_57	PPA23_ARATH^PPA23_ARATH^Q:247-1581,H:5-447^75.785%ID^E:0^RecName: Full=Purple acid phosphatase 23;^Eukaryota; Viridiplantae; Streptophyta; Embryophyta; Tracheophyta; Spermatophyta; Magnoliopsida; eudicotyledons; Gunneridae; Pentapetalae; rosids; malvids; Brassicales; Brassicaceae; Camelineae; Arabidopsis	1.48358	1.52258	-0.139856	0.343033	0.392116	0.71449	-5.30053	-5.30053	-5.30053	1.41069	1.26947	0.907944	1.16119	1.42997	0.223655	2.12573	3.05702
1	Ntome_NODE_10631_length_2115_cov_31	.	0.630837	0.853229	1.2158	-1.95413	-1.95413	-0.954126	-2.95413	-2.95413	-2.95413	0.0458741	1.2938	0.952765	1.95276	1.04587	1.2158	2.47214	2.04587
1	Ntome_NODE_10632_length_2114_cov_244	RD23D_ARATH^RD23D_ARATH^Q:273-1457,H:1-377^66.919%ID^E:1.39e-156^RecName: Full=Ubiquitin receptor RAD23d;^Eukaryota; Viridiplantae; Streptophyta; Embryophyta; Tracheophyta; Spermatophyta; Magnoliopsida; eudicotyledons; Gunneridae; Pentapetalae; rosids; malvids; Brassicales; Brassicaceae; Camelineae; Arabidopsis	2.75081	2.769	0.415472	1.44793	0.772038	0.744673	-8.12217	-8.12217	-5.94585	1.61015	1.23263	1.14468	1.45253	1.46849	1.55101	2.21656	2.61423
1	Ntome_NODE_10633_length_2114_cov_226	NSRP1_DANRE^NSRP1_DANRE^Q:1626-862,H:1-242^35.985%ID^E:1.83e-21^RecName: Full=Nuclear speckle splicing regulatory protein 1;^Eukaryota; Metazoa; Chordata; Craniata; Vertebrata; Euteleostomi; Actinopterygii; Neopterygii; Teleostei; Ostariophysi; Cypriniformes; Cyprinidae; Danio	0.376471	0.219279	-0.925664	0.0916879	-0.217888	0.588151	-2.69531	-2.3162	-2.97761	0.736	0.442461	0.737146	1.24121	0.718536	0.662205	1.57488	1.74465
1	Ntome_NODE_10635_length_2114_cov_173	PP248_ARATH^PP248_ARATH^Q:226-1677,H:27-522^47.887%ID^E:1.9e-149^RecName: Full=Pentatricopeptide repeat-containing protein At3g22670, mitochondrial;^Eukaryota; Viridiplantae; Streptophyta; Embryophyta; Tracheophyta; Spermatophyta; Magnoliopsida; eudicotyledons; Gunneridae; Pentapetalae; rosids; malvids; Brassicales; Brassicaceae; Camelineae; Arabidopsis`PP248_ARATH^PP248_ARATH^Q:634-1482,H:276-55…	1.70245	1.20644	0.590885	0.129703	-0.152176	1.18391	-4.37234	-5.25986	-5.25986	0.828235	-0.264832	1.06224	1.97558	1.40334	0.409446	1.7952	3.02165
1	Ntome_NODE_10636_length_2114_cov_165	.	0.60945	0.555901	-0.775981	0.895864	-0.0961761	0.602353	-5.73946	-4.14969	-3.39179	1.20259	1.27077	0.563778	1.66142	0.910017	0.282691	2.4612	3.13706
1	Ntome_NODE_10637_length_2114_cov_155	HDA2_ARATH^HDA2_ARATH^Q:170-1198,H:26-385^67.575%ID^E:8.13e-162^RecName: Full=Histone deacetylase 2;^Eukaryota; Viridiplantae; Streptophyta; Embryophyta; Tracheophyta; Spermatophyta; Magnoliopsida; eudicotyledons; Gunneridae; Pentapetalae; rosids; malvids; Brassicales; Brassicaceae; Camelineae; Arabidopsis	2.27507	1.81267	0.729003	0.507724	-0.502589	-0.0770833	-5.02615	-2.63109	-5.02615	0.573464	0.0827913	0.143774	1.61785	0.40614	0.204206	2.40631	2.50406
1	Ntome_NODE_10639_length_2114_cov_94	ATXR4_ARATH^ATXR4_ARATH^Q:1950-1492,H:40-192^58.17%ID^E:6.47e-52^RecName: Full=Histone-lysine N-methyltransferase ATXR4;^Eukaryota; Viridiplantae; Streptophyta; Embryophyta; Tracheophyta; Spermatophyta; Magnoliopsida; eudicotyledons; Gunneridae; Pentapetalae; rosids; malvids; Brassicales; Brassicaceae; Camelineae; Arabidopsis`ATXR4_ARATH^ATXR4_ARATH^Q:646-206,H:178-325^63.514%ID^E:2.11e-49^RecNam…	0.717456	0.702413	0.309606	0.406295	-1.65984	-0.00736736	-1.09517	-1.85043	-2.88704	-0.324723	0.48719	-1.11675	1.16754	0.671277	1.14175	1.3729	1.96489
1	Ntome_NODE_1064_length_5003_cov_286	PHOT1_ARATH^PHOT1_ARATH^Q:1605-4616,H:22-996^70.939%ID^E:0^RecName: Full=Phototropin-1;^Eukaryota; Viridiplantae; Streptophyta; Embryophyta; Tracheophyta; Spermatophyta; Magnoliopsida; eudicotyledons; Gunneridae; Pentapetalae; rosids; malvids; Brassicales; Brassicaceae; Camelineae; Arabidopsis	1.01653	0.922501	-0.158363	0.829394	0.673443	0.837995	-5.91596	-6.24629	-5.48014	1.42004	1.26512	0.941441	1.79851	1.25578	1.59219	2.16762	3.08018
1	Ntome_NODE_10640_length_2114_cov_92	.	-0.199607	1.38571	0.0562324	0.447863	-1.1241	0.347541	-1.94377	-3.14468	-3.94377	1.42779	0.30416	-0.911667	0.800393	0.463585	1.13476	2.30416	2.59539
1	Ntome_NODE_10641_length_2114_cov_65	MTEF1_ARATH^MTEF1_ARATH^Q:2074-1466,H:67-273^39.614%ID^E:4.43e-32^RecName: Full=Transcription termination factor MTEF1, chloroplastic {ECO:0000305};^Eukaryota; Viridiplantae; Streptophyta; Embryophyta; Tracheophyta; Spermatophyta; Magnoliopsida; eudicotyledons; Gunneridae; Pentapetalae; rosids; malvids; Brassicales; Brassicaceae; Camelineae; Arabidopsis	1.08478	1.08609	-0.466451	-0.222781	-0.0721193	-0.760989	-1.51039	-2.07322	-2.35364	0.348578	0.520506	-0.163498	0.69124	0.682158	-0.24241	1.51333	1.93882
1	Ntome_NODE_10645_length_2113_cov_298	CAP10_ARATH^CAP10_ARATH^Q:71-1684,H:11-540^64.364%ID^E:0^RecName: Full=Putative clathrin assembly protein At5g35200;^Eukaryota; Viridiplantae; Streptophyta; Embryophyta; Tracheophyta; Spermatophyta; Magnoliopsida; eudicotyledons; Gunneridae; Pentapetalae; rosids; malvids; Brassicales; Brassicaceae; Camelineae; Arabidopsis	1.05873	1.1514	-0.486056	0.204427	0.582159	0.29446	-6.86101	-4.11705	-3.92067	1.21689	1.52173	0.834536	1.5973	1.61974	1.25992	2.11815	1.92536
1	Ntome_NODE_10646_length_2102_cov_212	UPS2_ARATH^UPS2_ARATH^Q:132-683,H:1-184^79.348%ID^E:1.03e-83^RecName: Full=Ureide permease 2 {ECO:0000303|PubMed:11971139};^Eukaryota; Viridiplantae; Streptophyta; Embryophyta; Tracheophyta; Spermatophyta; Magnoliopsida; eudicotyledons; Gunneridae; Pentapetalae; rosids; malvids; Brassicales; Brassicaceae; Camelineae; Arabidopsis`UPS2_ARATH^UPS2_ARATH^Q:1171-1788,H:195-398^73.786%ID^E:2.82e-80^Rec…	0.910751	0.910751	-0.0544838	-0.276876	-0.359338	-0.276876	-4.4468	-1.4468	-4.4468	-0.124873	0.553199	0.253638	1.46009	1.76265	2.12305	1.92824	1.53048
1	Ntome_NODE_10647_length_2113_cov_194	CDKC1_ARATH^CDKC1_ARATH^Q:1833-466,H:1-459^81.641%ID^E:0^RecName: Full=Cyclin-dependent kinase C-1;^Eukaryota; Viridiplantae; Streptophyta; Embryophyta; Tracheophyta; Spermatophyta; Magnoliopsida; eudicotyledons; Gunneridae; Pentapetalae; rosids; malvids; Brassicales; Brassicaceae; Camelineae; Arabidopsis	2.0934	1.5654	0.107091	0.678141	0.3469	0.271308	-5.36735	-5.36735	-5.36735	1.49088	1.08354	1.02171	1.15622	1.23687	0.842498	1.57611	2.63198
1	Ntome_NODE_10648_length_2113_cov_187	.	2.08154	1.94554	0.263639	0.963183	0.388115	0.729014	-5.8798	-5.8798	-5.8798	0.882952	1.31299	0.216129	1.65229	1.52305	1.41151	1.76406	2.50538
1	Ntome_NODE_10649_length_2113_cov_151	.	1.31436	2.02805	-0.0486745	0.614977	0.987857	0.375465	-3.25292	-5.97539	-5.97539	1.45507	0.619014	0.254395	1.04942	1.09543	1.03013	1.7036	2.7246
1	Ntome_NODE_1065_length_5003_cov_107	POLR2_ARATH^POLR2_ARATH^Q:1760-207,H:932-1456^38.606%ID^E:4.29e-94^RecName: Full=Retrovirus-related Pol polyprotein from transposon RE2;^Eukaryota; Viridiplantae; Streptophyta; Embryophyta; Tracheophyta; Spermatophyta; Magnoliopsida; eudicotyledons; Gunneridae; Pentapetalae; rosids; malvids; Brassicales; Brassicaceae; Camelineae; Arabidopsis`POLR2_ARATH^POLR2_ARATH^Q:3129-2671,H:446-598^29.299%ID…	1.54076	1.6695	0.144835	1.27773	-0.26179	0.81974	-5.68805	-5.68805	-5.68805	1.92665	0.461692	0.651795	2.71709	0.970157	0.851104	1.4515	2.8434
1	Ntome_NODE_10650_length_2113_cov_110	.	1.97998	1.69989	1.90925	0.821226	-0.0500899	0.0728793	-4.42986	-4.78077	-4.81604	0.277288	0.84598	0.382558	1.48049	0.504812	-0.901556	2.37442	2.62956
1	Ntome_NODE_10651_length_2113_cov_80	SYT3_ARATH^SYT3_ARATH^Q:279-1826,H:32-539^61.464%ID^E:0^RecName: Full=Synaptotagmin-3;^Eukaryota; Viridiplantae; Streptophyta; Embryophyta; Tracheophyta; Spermatophyta; Magnoliopsida; eudicotyledons; Gunneridae; Pentapetalae; rosids; malvids; Brassicales; Brassicaceae; Camelineae; Arabidopsis	1.96184	1.34365	-1.36043	1.60226	-0.548243	0.454647	-3.45128	-2.40165	-3.45128	0.660584	-0.25751	0.132478	1.01143	0.0622091	-1.12935	3.04057	2.33008
1	Ntome_NODE_10653_length_2112_cov_291	MORC1_ARATH^MORC1_ARATH^Q:1870-281,H:56-596^58.106%ID^E:0^RecName: Full=Protein MICRORCHIDIA 1 {ECO:0000303|PubMed:22555433};^Eukaryota; Viridiplantae; Streptophyta; Embryophyta; Tracheophyta; Spermatophyta; Magnoliopsida; eudicotyledons; Gunneridae; Pentapetalae; rosids; malvids; Brassicales; Brassicaceae; Camelineae; Arabidopsis	1.96359	1.97433	0.831186	0.490784	0.203707	0.862602	-6.43972	-6.43972	-6.43972	1.19299	0.687504	0.900668	2.09622	1.53521	0.971032	2.43065	3.17867
1	Ntome_NODE_10654_length_2112_cov_242	.	0.695685	1.07611	-0.753346	0.980865	-0.74942	0.645881	-4.21409	-4.21409	-4.21409	-0.209587	-0.310086	-1.6412	2.24206	1.54213	1.2918	3.61462	4.21674
1	Ntome_NODE_10656_length_2112_cov_24	.	-0.184085	-0.0143034	0.721518	-0.500875	-0.644	-0.0246371	-3.6708	-3.6708	-3.6708	0.766827	0.485435	0.696571	1.73008	0.852762	1.2936	2.27453	3.55898
1	Ntome_NODE_10658_length_2111_cov_295	ACCC1_POPTR^ACCC1_POPTR^Q:206-1801,H:3-528^90.602%ID^E:0^RecName: Full=Biotin carboxylase 1, chloroplastic;^Eukaryota; Viridiplantae; Streptophyta; Embryophyta; Tracheophyta; Spermatophyta; Magnoliopsida; eudicotyledons; Gunneridae; Pentapetalae; rosids; fabids; Malpighiales; Salicaceae; Saliceae; Populus	1.36468	0.998651	-0.470948	1.50486	0.827762	0.905771	-6.56359	-4.8605	-7.21463	1.27233	1.18735	1.15273	2.0745	1.04775	1.32422	2.70559	2.74347
1	Ntome_NODE_10659_length_2111_cov_285	SPAG1_DANRE^SPAG1_DANRE^Q:1511-1888,H:129-256^34.375%ID^E:2.88e-12^RecName: Full=Sperm-associated antigen 1A;^Eukaryota; Metazoa; Chordata; Craniata; Vertebrata; Euteleostomi; Actinopterygii; Neopterygii; Teleostei; Ostariophysi; Cypriniformes; Cyprinidae; Danio	2.18409	2.16188	0.432495	1.23755	0.753545	0.331575	-6.49855	-7.11679	-7.09531	1.61963	1.41034	1.14538	1.64073	1.65452	1.4711	2.29676	2.37105
1	Ntome_NODE_1066_length_5003_cov_68	PP443_ARATH^PP443_ARATH^Q:4890-1960,H:7-965^39.653%ID^E:0^RecName: Full=Pentatricopeptide repeat-containing protein At5g62370;^Eukaryota; Viridiplantae; Streptophyta; Embryophyta; Tracheophyta; Spermatophyta; Magnoliopsida; eudicotyledons; Gunneridae; Pentapetalae; rosids; malvids; Brassicales; Brassicaceae; Camelineae; Arabidopsis	0.463878	-0.170903	-0.350987	-0.125948	-0.79163	-0.167461	-2.52287	-2.60197	-2.96454	1.02497	0.991102	0.847077	1.14178	0.593288	0.802796	1.584	2.24742
1	Ntome_NODE_10660_length_2111_cov_276	4CLL7_ARATH^4CLL7_ARATH^Q:199-1812,H:1-544^69.818%ID^E:0^RecName: Full=4-coumarate--CoA ligase-like 7;^Eukaryota; Viridiplantae; Streptophyta; Embryophyta; Tracheophyta; Spermatophyta; Magnoliopsida; eudicotyledons; Gunneridae; Pentapetalae; rosids; malvids; Brassicales; Brassicaceae; Camelineae; Arabidopsis	1.01008	0.62291	0.189947	1.05392	0.406419	1.36566	-6.97365	-6.97365	-6.97365	1.86571	1.68838	1.7888	2.28868	0.798299	2.02361	3.28491	2.53363
1	Ntome_NODE_10662_length_2108_cov_151	RL131_ARATH^RL131_ARATH^Q:771-1343,H:1-191^84.817%ID^E:6.79e-115^RecName: Full=60S ribosomal protein L13-1;^Eukaryota; Viridiplantae; Streptophyta; Embryophyta; Tracheophyta; Spermatophyta; Magnoliopsida; eudicotyledons; Gunneridae; Pentapetalae; rosids; malvids; Brassicales; Brassicaceae; Camelineae; Arabidopsis	2.34418	2.00269	0.818343	0.847917	0.0876461	1.25868	-6.16176	-5.26868	-6.94742	1.10194	0.634624	0.727695	1.82865	1.08106	0.465513	1.92726	3.25165
1	Ntome_NODE_10663_length_2111_cov_122	.	1.16049	1.55515	1.55515	0.107694	0.454587	0.233225	-1.76677	-2.35174	-3.35174	0.0583325	-0.766775	-1.02981	-0.0298091	0.348703	-0.181812	1.33027	2.67484
1	Ntome_NODE_10664_length_2111_cov_114	FKB18_ARATH^FKB18_ARATH^Q:1289-1630,H:112-225^85.088%ID^E:1.85e-53^RecName: Full=Peptidyl-prolyl cis-trans isomerase FKBP18, chloroplastic;^Eukaryota; Viridiplantae; Streptophyta; Embryophyta; Tracheophyta; Spermatophyta; Magnoliopsida; eudicotyledons; Gunneridae; Pentapetalae; rosids; malvids; Brassicales; Brassicaceae; Camelineae; Arabidopsis	1.48572	1.35462	0.534961	-0.336627	-0.572778	0.172509	-4.59515	-2.95823	-4.59515	1.14254	0.693582	0.92873	1.24959	0.270773	-0.432453	2.38454	3.27281
1	Ntome_NODE_10666_length_2110_cov_295	.	0.853517	1.14089	0.344421	0.0598136	0.233177	-0.42475	-5.48127	-4.54736	-3.4759	1.67704	0.741504	1.0117	0.894458	0.87005	0.861498	3.52136	1.71986
1	Ntome_NODE_10667_length_2110_cov_273	KSG5_ARATH^KSG5_ARATH^Q:420-1649,H:1-410^86.683%ID^E:0^RecName: Full=Shaggy-related protein kinase epsilon;^Eukaryota; Viridiplantae; Streptophyta; Embryophyta; Tracheophyta; Spermatophyta; Magnoliopsida; eudicotyledons; Gunneridae; Pentapetalae; rosids; malvids; Brassicales; Brassicaceae; Camelineae; Arabidopsis	1.05488	0.952167	-0.186732	-0.185673	-0.599947	-0.0368744	-2.58628	-2.39774	-2.33144	0.379762	-0.0804631	0.376204	0.901547	0.553943	0.553795	1.54335	2.0895
1	Ntome_NODE_10668_length_2110_cov_250	HMA1_ARATH^HMA1_ARATH^Q:1550-12,H:100-615^71.18%ID^E:0^RecName: Full=Probable cadmium/zinc-transporting ATPase HMA1, chloroplastic;^Eukaryota; Viridiplantae; Streptophyta; Embryophyta; Tracheophyta; Spermatophyta; Magnoliopsida; eudicotyledons; Gunneridae; Pentapetalae; rosids; malvids; Brassicales; Brassicaceae; Camelineae; Arabidopsis	1.50604	1.00289	-0.131942	-0.143021	-0.379211	-0.129186	-4.2124	-4.83389	-3.39779	1.23483	0.68042	0.527639	1.69675	1.04565	1.02657	1.86259	2.64404
1	Ntome_NODE_1067_length_5002_cov_304	ODO1_DICDI^ODO1_DICDI^Q:1682-4594,H:23-1006^53.106%ID^E:0^RecName: Full=2-oxoglutarate dehydrogenase, mitochondrial;^Eukaryota; Amoebozoa; Mycetozoa; Dictyostelids; Dictyosteliales; Dictyosteliaceae; Dictyostelium	1.71265	1.50903	0.155844	0.159666	-0.0119349	0.218072	-3.7706	-4.31985	-4.87506	0.789575	0.559428	0.345661	1.0844	0.826828	0.743829	2.27698	2.59547
1	Ntome_NODE_10670_length_2110_cov_213	PPR68_ARATH^PPR68_ARATH^Q:1913-99,H:1-606^56.25%ID^E:0^RecName: Full=Pentatricopeptide repeat-containing protein At1g31920;^Eukaryota; Viridiplantae; Streptophyta; Embryophyta; Tracheophyta; Spermatophyta; Magnoliopsida; eudicotyledons; Gunneridae; Pentapetalae; rosids; malvids; Brassicales; Brassicaceae; Camelineae; Arabidopsis	0.745434	0.462006	0.462006	-0.662214	-0.55128	-0.233483	-4.12296	-3.12296	-4.12296	1.55201	0.676131	1.09815	0.321313	0.275531	-0.793833	3.13443	4.88267
1	Ntome_NODE_10673_length_2110_cov_180	XPOT_ARATH^XPOT_ARATH^Q:1610-2110,H:1-166^70.06%ID^E:5.2e-71^RecName: Full=Exportin-T;^Eukaryota; Viridiplantae; Streptophyta; Embryophyta; Tracheophyta; Spermatophyta; Magnoliopsida; eudicotyledons; Gunneridae; Pentapetalae; rosids; malvids; Brassicales; Brassicaceae; Camelineae; Arabidopsis	0.247364	0.757237	-0.331892	-0.812744	-0.499513	0.0261619	-1.97308	-1.31031	-2.25735	0.17583	0.590321	0.0422816	0.965203	0.521274	0.140158	1.56656	2.15249
1	Ntome_NODE_10677_length_2109_cov_268	AATP3_ARATH^AATP3_ARATH^Q:228-1520,H:25-453^56.881%ID^E:2.74e-170^RecName: Full=AAA-ATPase At2g18193;^Eukaryota; Viridiplantae; Streptophyta; Embryophyta; Tracheophyta; Spermatophyta; Magnoliopsida; eudicotyledons; Gunneridae; Pentapetalae; rosids; malvids; Brassicales; Brassicaceae; Camelineae; Arabidopsis	1.28471	1.50496	0.366527	0.344638	0.438848	0.307328	-5.04099	-3.10009	-4.16532	1.57275	0.275132	0.0108013	0.764232	0.783279	0.709721	1.8736	2.06989
1	Ntome_NODE_10679_length_2109_cov_240	ODPB1_ARATH^ODPB1_ARATH^Q:196-1092,H:9-309^84.053%ID^E:0^RecName: Full=Pyruvate dehydrogenase E1 component subunit beta-1, mitochondrial;^Eukaryota; Viridiplantae; Streptophyta; Embryophyta; Tracheophyta; Spermatophyta; Magnoliopsida; eudicotyledons; Gunneridae; Pentapetalae; rosids; malvids; Brassicales; Brassicaceae; Camelineae; Arabidopsis`ODPB1_ARATH^ODPB1_ARATH^Q:1540-1704,H:308-362^87.273%I…	2.26778	2.12752	0.349948	0.800152	0.511343	0.627967	-7.76697	-6.15816	-5.96374	1.32621	1.37881	1.01999	1.76578	1.45114	1.25176	2.25137	2.7591
1	Ntome_NODE_1068_length_5000_cov_132	RDUF2_ARATH^RDUF2_ARATH^Q:4771-3884,H:16-298^50.321%ID^E:2.06e-65^RecName: Full=E3 ubiquitin-protein ligase RDUF2 {ECO:0000305};^Eukaryota; Viridiplantae; Streptophyta; Embryophyta; Tracheophyta; Spermatophyta; Magnoliopsida; eudicotyledons; Gunneridae; Pentapetalae; rosids; malvids; Brassicales; Brassicaceae; Camelineae; Arabidopsis	1.86919	1.06144	0.0223711	0.216862	0.0882602	-0.412166	-3.6554	-3.80776	-3.94473	1.00344	0.57189	0.769901	1.24411	0.825463	0.771084	1.77956	1.59649
1	Ntome_NODE_10680_length_2109_cov_134	.	1.54623	1.17495	0.168777	0.416849	0.60935	1.16809	-5.22354	-2.41619	-4.22354	0.252517	0.134012	-0.369544	0.852206	0.796606	0.578136	1.5887	2.94638
1	Ntome_NODE_10681_length_2109_cov_132	CCD25_XENTR^CCD25_XENTR^Q:193-435,H:1-81^75.309%ID^E:2.01e-33^RecName: Full=Coiled-coil domain-containing protein 25;^Eukaryota; Metazoa; Chordata; Craniata; Vertebrata; Euteleostomi; Amphibia; Batrachia; Anura; Pipoidea; Pipidae; Xenopodinae; Xenopus; Silurana	2.01664	2.20759	0.363293	-0.0151672	-0.518622	0.439726	-4.18509	-5.43605	-5.43605	0.764403	0.790262	1.24469	1.47168	1.12726	0.961578	1.34531	2.85857
1	Ntome_NODE_10682_length_2109_cov_47	EF118_ARATH^EF118_ARATH^Q:1471-1091,H:36-167^39.394%ID^E:3.14e-10^RecName: Full=Ethylene-responsive transcription factor ERF118;^Eukaryota; Viridiplantae; Streptophyta; Embryophyta; Tracheophyta; Spermatophyta; Magnoliopsida; eudicotyledons; Gunneridae; Pentapetalae; rosids; malvids; Brassicales; Brassicaceae; Camelineae; Arabidopsis	1.39117	0.608517	0.444283	1.315	-0.437073	1.68534	-3.6778	-4.685	-4.685	0.667617	-0.258735	0.434771	1.38603	1.26943	-0.041144	1.77574	2.80685
1	Ntome_NODE_10683_length_2109_cov_13	GH31_ARATH^GH31_ARATH^Q:2034-232,H:1-589^77.741%ID^E:0^RecName: Full=Probable indole-3-acetic acid-amido synthetase GH3.1;^Eukaryota; Viridiplantae; Streptophyta; Embryophyta; Tracheophyta; Spermatophyta; Magnoliopsida; eudicotyledons; Gunneridae; Pentapetalae; rosids; malvids; Brassicales; Brassicaceae; Camelineae; Arabidopsis	2.62918	2.45286	0.452855	0.743673	0.742362	-1.13211	-2.71707	-2.71707	-2.71707	-1.13211	-0.132107	-1.13211	0.090285	1.74236	-0.71707	1.67525	1.86789
1	Ntome_NODE_10684_length_2108_cov_259	CAX5_ARATH^CAX5_ARATH^Q:1623-340,H:1-437^68.421%ID^E:0^RecName: Full=Vacuolar cation/proton exchanger 5;^Eukaryota; Viridiplantae; Streptophyta; Embryophyta; Tracheophyta; Spermatophyta; Magnoliopsida; eudicotyledons; Gunneridae; Pentapetalae; rosids; malvids; Brassicales; Brassicaceae; Camelineae; Arabidopsis	0.12759	-0.173456	-1.0893	-0.801101	-0.674258	1.12448	-3.25922	-4.25922	-4.25922	1.92506	1.1704	0.989846	2.02303	1.51372	1.19791	2.26183	2.1819
1	Ntome_NODE_10685_length_2108_cov_241	RS18_ARATH^RS18_ARATH^Q:984-1439,H:1-152^92.105%ID^E:2.47e-85^RecName: Full=40S ribosomal protein S18;^Eukaryota; Viridiplantae; Streptophyta; Embryophyta; Tracheophyta; Spermatophyta; Magnoliopsida; eudicotyledons; Gunneridae; Pentapetalae; rosids; malvids; Brassicales; Brassicaceae; Camelineae; Arabidopsis	2.85501	2.6702	-0.828074	1.33761	0.864053	0.0898738	-3.51982	-3.69522	-5.08548	0.5802	0.392709	-0.0714223	0.686391	0.507404	0.246452	0.98779	1.98231
1	Ntome_NODE_10686_length_2108_cov_229	GLYM_SOLTU^GLYM_SOLTU^Q:212-1768,H:1-518^95.376%ID^E:0^RecName: Full=Serine hydroxymethyltransferase, mitochondrial;^Eukaryota; Viridiplantae; Streptophyta; Embryophyta; Tracheophyta; Spermatophyta; Magnoliopsida; eudicotyledons; Gunneridae; Pentapetalae; asterids; lamiids; Solanales; Solanaceae; Solanoideae; Solaneae; Solanum	2.17277	1.66407	0.660868	1.30241	0.227908	0.153908	-4.09402	-4.09402	-4.09402	-1.18905	-0.0940198	1.13518	1.54984	-1.05664	0.200968	2.54984	3.00401
1	Ntome_NODE_10687_length_2108_cov_224	TMVRN_NICGU^TMVRN_NICGU^Q:168-1709,H:9-511^38.196%ID^E:3.25e-87^RecName: Full=TMV resistance protein N;^Eukaryota; Viridiplantae; Streptophyta; Embryophyta; Tracheophyta; Spermatophyta; Magnoliopsida; eudicotyledons; Gunneridae; Pentapetalae; asterids; lamiids; Solanales; Solanaceae; Nicotianoideae; Nicotianeae; Nicotiana	-0.264479	1.90476	-0.284433	0.140948	1.84703	0.374083	-5.29834	-5.29834	-5.29834	3.71498	-0.688942	0.00908627	1.2671	0.772047	2.04444	2.93048	2.12792
1	Ntome_NODE_10689_length_2108_cov_99	.	1.59318	1.20157	0.483814	0.0935128	-0.112938	0.624028	-5.39834	-3.81338	-4.39834	0.887062	1.14082	0.60166	1.64605	1.14082	0.555856	1.5605	2.19412
1	Ntome_NODE_10690_length_2108_cov_90	.	1.65152	0.906483	1.02059	0.66254	0.195366	0.76053	-5.48721	-3.90225	-5.48721	0.53516	0.44353	0.642075	1.55708	0.988526	0.489843	1.87034	3.15307
1	Ntome_NODE_10693_length_2107_cov_304	C3H19_ARATH^C3H19_ARATH^Q:1546-2,H:580-1041^50%ID^E:6.24e-146^RecName: Full=Zinc finger CCCH domain-containing protein 19;^Eukaryota; Viridiplantae; Streptophyta; Embryophyta; Tracheophyta; Spermatophyta; Magnoliopsida; eudicotyledons; Gunneridae; Pentapetalae; rosids; malvids; Brassicales; Brassicaceae; Camelineae; Arabidopsis	1.61648	1.34262	0.421799	-0.670902	-0.000858869	0.891074	-6.09784	-5.05519	-6.09784	1.63687	0.857987	0.983566	1.92225	1.72757	1.68974	2.04156	2.79112
1	Ntome_NODE_10694_length_2107_cov_117	CP19C_ARATH^CP19C_ARATH^Q:782-273,H:3-172^79.412%ID^E:4.69e-78^RecName: Full=Peptidyl-prolyl cis-trans isomerase CYP19-3;^Eukaryota; Viridiplantae; Streptophyta; Embryophyta; Tracheophyta; Spermatophyta; Magnoliopsida; eudicotyledons; Gunneridae; Pentapetalae; rosids; malvids; Brassicales; Brassicaceae; Camelineae; Arabidopsis	1.67526	1.73051	-0.0704634	0.217339	0.262514	-0.169129	-6.33725	-4.87782	-4.15774	1.04602	1.30632	0.871813	0.975179	1.11676	0.370937	2.377	3.66275
1	Ntome_NODE_10695_length_2107_cov_117	AB3G_ARATH^AB3G_ARATH^Q:249-1172,H:30-345^82.278%ID^E:1.05e-175^RecName: Full=ABC transporter G family member 3;^Eukaryota; Viridiplantae; Streptophyta; Embryophyta; Tracheophyta; Spermatophyta; Magnoliopsida; eudicotyledons; Gunneridae; Pentapetalae; rosids; malvids; Brassicales; Brassicaceae; Camelineae; Arabidopsis	1.5403	1.21419	0.0734206	-1.1125	-0.911625	-1.00156	-5.2936	-5.2936	-4.26503	2.56289	2.39402	1.94289	1.55715	2.05866	0.643508	1.87532	2.01556
1	Ntome_NODE_10696_length_2107_cov_41	.	1.62666	1.06478	-0.742573	-1.32754	0.47982	-0.327535	-3.32754	-3.32754	-3.32754	0.84239	0.672465	0.579355	0.131896	2.00015	0.994393	1.67201	2.31632
1	Ntome_NODE_10697_length_2107_cov_34	.	0.766214	-2.04114	-1.04114	-1.04114	-0.0411408	0.543822	-2.04114	-2.04114	-2.04114	0.543822	1.41829	-0.0411408	-0.456178	0.543822	0.958859	2.6593	3.35118
1	Ntome_NODE_107_length_8381_cov_103	.	1.67628	1.1197	1.01623	0.775286	0.500096	1.2395	-5.95359	-3.35904	-3.53135	-0.0819894	0.670807	-0.976765	1.76949	0.777597	1.03294	1.61733	1.70748
1	Ntome_NODE_1070_length_4998_cov_264	FUBP2_CHICK^FUBP2_CHICK^Q:776-1345,H:189-366^35.714%ID^E:3.21e-21^RecName: Full=Far upstream element-binding protein 2;^Eukaryota; Metazoa; Chordata; Craniata; Vertebrata; Euteleostomi; Archelosauria; Archosauria; Dinosauria; Saurischia; Theropoda; Coelurosauria; Aves; Neognathae; Galloanserae; Galliformes; Phasianidae; Phasianinae; Gallus`FUBP2_CHICK^FUBP2_CHICK^Q:818-1354,H:286-456^27.869%ID^E:…	1.29694	1.31244	0.522543	0.0767905	-0.200154	0.546576	-6.44011	-3.1615	-5.55876	1.14771	1.12902	0.730288	1.71293	1.17905	0.847812	2.24211	2.61631
1	Ntome_NODE_10700_length_2106_cov_282	.	2.37482	1.92888	1.37065	1.21399	0.724828	0.741093	-6.47484	-6.05981	-7.05981	0.601971	0.853082	1.0669	1.42602	0.68166	1.11372	3.13987	2.35699
1	Ntome_NODE_10702_length_2106_cov_273	.	1.14045	1.33744	-0.298977	-0.222871	-0.480778	-0.143545	-3.52351	-3.26178	-3.54189	1.13921	0.568701	0.52191	1.30484	1.50514	1.41928	1.57869	0.957694
1	Ntome_NODE_10705_length_2106_cov_137	DTX27_ARATH^DTX27_ARATH^Q:1220-1705,H:322-483^76.543%ID^E:4.29e-70^RecName: Full=Protein DETOXIFICATION 27 {ECO:0000303|PubMed:11739388};^Eukaryota; Viridiplantae; Streptophyta; Embryophyta; Tracheophyta; Spermatophyta; Magnoliopsida; eudicotyledons; Gunneridae; Pentapetalae; rosids; malvids; Brassicales; Brassicaceae; Camelineae; Arabidopsis	3.41015	3.02918	2.08768	2.08693	1.49418	2.2411	-5.18164	-5.18164	-5.18164	-1.71305	-0.722206	-1.97218	-0.536628	0.509617	-0.380479	2.74602	3.26462
1	Ntome_NODE_10706_length_2106_cov_113	F6H11_IPOBA^F6H11_IPOBA^Q:1280-1888,H:155-357^57.635%ID^E:1.71e-81^RecName: Full=Feruloyl CoA ortho-hydroxylase F6H1-1 {ECO:0000303|PubMed:22169019};^Eukaryota; Viridiplantae; Streptophyta; Embryophyta; Tracheophyta; Spermatophyta; Magnoliopsida; eudicotyledons; Gunneridae; Pentapetalae; asterids; lamiids; Solanales; Convolvulaceae; Ipomoeeae; Ipomoea`F6H11_IPOBA^F6H11_IPOBA^Q:243-740,H:7-172^50.…	0.487951	0.0686633	-1.01427	-0.0142663	-0.184191	0.459665	-5.18419	-4.18419	-5.18419	1.59638	0.791485	1.42934	2.29954	1.60658	1.41587	2.32543	3.28439
1	Ntome_NODE_10707_length_2106_cov_80	BRX11_ARATH^BRX11_ARATH^Q:1975-1322,H:1-217^75.799%ID^E:4.59e-111^RecName: Full=Ribosome biogenesis protein BRX1 homolog 1 {ECO:0000305};^Eukaryota; Viridiplantae; Streptophyta; Embryophyta; Tracheophyta; Spermatophyta; Magnoliopsida; eudicotyledons; Gunneridae; Pentapetalae; rosids; malvids; Brassicales; Brassicaceae; Camelineae; Arabidopsis`BRX11_ARATH^BRX11_ARATH^Q:572-273,H:215-314^79%ID^E:1.…	0.933993	1.09153	-0.959092	-0.242885	-0.678984	-0.959092	-3.76645	-2.18148	-4.76645	1.50034	1.60859	1.29964	1.01491	1.50034	1.14044	1.6765	1.78814
1	Ntome_NODE_10708_length_2106_cov_72	R1B12_SOLDE^R1B12_SOLDE^Q:1883-51,H:565-1208^33.839%ID^E:5.68e-90^RecName: Full=Putative late blight resistance protein homolog R1B-12;^Eukaryota; Viridiplantae; Streptophyta; Embryophyta; Tracheophyta; Spermatophyta; Magnoliopsida; eudicotyledons; Gunneridae; Pentapetalae; asterids; lamiids; Solanales; Solanaceae; Solanoideae; Solaneae; Solanum	2.0374	0.661488	0.38729	-0.198573	-1.03115	0.84492	-4.19947	-4.19947	-4.19947	0.970451	1.08371	1.00998	1.84273	1.50291	1.08667	0.654521	1.74609
1	Ntome_NODE_10709_length_2106_cov_42	FB294_ARATH^FB294_ARATH^Q:426-1568,H:6-356^25.253%ID^E:2.2e-12^RecName: Full=Putative F-box protein At5g55150;^Eukaryota; Viridiplantae; Streptophyta; Embryophyta; Tracheophyta; Spermatophyta; Magnoliopsida; eudicotyledons; Gunneridae; Pentapetalae; rosids; malvids; Brassicales; Brassicaceae; Camelineae; Arabidopsis	1.52742	1.49827	0.342995	-0.209546	-0.531474	0.275881	-2.11644	-2.11644	-4.11644	1.20549	-0.295747	-0.202829	0.334445	0.741544	0.741544	1.30983	1.61148
1	Ntome_NODE_1071_length_4997_cov_170	BLH6_ARATH^BLH6_ARATH^Q:1623-370,H:138-532^47.307%ID^E:1.07e-90^RecName: Full=BEL1-like homeodomain protein 6;^Eukaryota; Viridiplantae; Streptophyta; Embryophyta; Tracheophyta; Spermatophyta; Magnoliopsida; eudicotyledons; Gunneridae; Pentapetalae; rosids; malvids; Brassicales; Brassicaceae; Camelineae; Arabidopsis	0.403043	0.73035	0.249702	0.597038	1.52706	1.45464	-7.31765	-5.62165	-6.275	1.51569	0.834588	0.981562	2.31693	2.11967	1.72157	2.7702	1.99226
1	Ntome_NODE_10712_length_2105_cov_283	P2C12_ARATH^P2C12_ARATH^Q:1906-620,H:1-428^81.119%ID^E:0^RecName: Full=Probable protein phosphatase 2C 12;^Eukaryota; Viridiplantae; Streptophyta; Embryophyta; Tracheophyta; Spermatophyta; Magnoliopsida; eudicotyledons; Gunneridae; Pentapetalae; rosids; malvids; Brassicales; Brassicaceae; Camelineae; Arabidopsis	0.385041	0.320806	0.544232	-0.461044	-0.434319	0.0824543	-1.77151	-2.69073	-2.52581	0.891677	0.804688	-0.0431197	1.31816	0.91219	0.547772	1.15578	0.963742
1	Ntome_NODE_10714_length_2105_cov_265	GLYP3_ARATH^GLYP3_ARATH^Q:180-1754,H:1-529^77.966%ID^E:0^RecName: Full=Serine hydroxymethyltransferase 3, chloroplastic;^Eukaryota; Viridiplantae; Streptophyta; Embryophyta; Tracheophyta; Spermatophyta; Magnoliopsida; eudicotyledons; Gunneridae; Pentapetalae; rosids; malvids; Brassicales; Brassicaceae; Camelineae; Arabidopsis	2.15173	2.05655	0.563472	-0.209567	-0.0943576	-0.14295	-5.06705	-4.05985	-5.06705	0.667659	0.885283	0.5943	1.83116	1.56798	0.15328	1.12277	3.04664
1	Ntome_NODE_10715_length_2105_cov_254	IPO11_MOUSE^IPO11_MOUSE^Q:3-1388,H:508-973^26.415%ID^E:4.13e-37^RecName: Full=Importin-11;^Eukaryota; Metazoa; Chordata; Craniata; Vertebrata; Euteleostomi; Mammalia; Eutheria; Euarchontoglires; Glires; Rodentia; Myomorpha; Muroidea; Muridae; Murinae; Mus; Mus	1.40543	1.71477	-0.417907	0.866422	0.554006	0.500012	-5.56887	-5.56887	-5.56887	1.76437	0.636285	0.867755	1.48933	1.12098	0.947772	2.40841	2.84898
1	Ntome_NODE_10717_length_2105_cov_220	C96AF_ARATH^C96AF_ARATH^Q:872-1573,H:275-497^44.872%ID^E:2.85e-98^RecName: Full=Alkane hydroxylase MAH1 {ECO:0000303|PubMed:17905869};^Eukaryota; Viridiplantae; Streptophyta; Embryophyta; Tracheophyta; Spermatophyta; Magnoliopsida; eudicotyledons; Gunneridae; Pentapetalae; rosids; malvids; Brassicales; Brassicaceae; Camelineae; Arabidopsis`C96AF_ARATH^C96AF_ARATH^Q:409-855,H:119-267^34.899%ID^E:2…	1.04392	1.20904	0.276805	-0.476912	-0.920165	0.61488	-5.98998	-5.98998	-5.25302	0.979721	0.755972	1.20966	2.69682	2.72084	1.98371	1.97388	3.16483
1	Ntome_NODE_10718_length_2105_cov_214	FB76_ARATH^FB76_ARATH^Q:1341-478,H:66-353^77.163%ID^E:4.78e-157^RecName: Full=F-box protein At1g67340;^Eukaryota; Viridiplantae; Streptophyta; Embryophyta; Tracheophyta; Spermatophyta; Magnoliopsida; eudicotyledons; Gunneridae; Pentapetalae; rosids; malvids; Brassicales; Brassicaceae; Camelineae; Arabidopsis	1.72039	1.35674	-0.155436	0.312392	-0.592287	0.383001	-3.91566	-3.91566	-2.96706	0.487611	1.40121	-0.291556	1.04086	0.46701	0.930836	1.69905	2.03854
1	Ntome_NODE_10719_length_2105_cov_177	SKI11_ARATH^SKI11_ARATH^Q:3-302,H:367-467^76.238%ID^E:7.23e-45^RecName: Full=F-box/kelch-repeat protein SKIP11;^Eukaryota; Viridiplantae; Streptophyta; Embryophyta; Tracheophyta; Spermatophyta; Magnoliopsida; eudicotyledons; Gunneridae; Pentapetalae; rosids; malvids; Brassicales; Brassicaceae; Camelineae; Arabidopsis	1.48196	1.67905	0.172779	0.483962	0.463598	0.0468423	-6.14225	-5.51788	-7.84269	1.9049	1.6099	1.21895	1.94661	1.92607	2.1715	2.25998	2.13673
1	Ntome_NODE_10720_length_2105_cov_118	.	0.699103	0.952499	1.00336	0.518722	0.244596	0.685482	-5.00984	-5.85435	-3.86221	1.6994	0.949808	0.501134	1.52518	0.969819	1.23629	1.73898	2.00203
1	Ntome_NODE_10721_length_2105_cov_108	.	1.12525	1.12059	0.884153	0.79236	0.323685	0.998109	-6.66824	-6.30567	-6.66824	1.58644	1.61054	1.39168	2.07995	1.03021	1.03319	3.14371	2.52229
1	Ntome_NODE_10723_length_2105_cov_74	PHL3_ARATH^PHL3_ARATH^Q:137-1024,H:7-289^60.39%ID^E:5.05e-108^RecName: Full=Protein PHR1-LIKE 3 {ECO:0000303|PubMed:26586833};^Eukaryota; Viridiplantae; Streptophyta; Embryophyta; Tracheophyta; Spermatophyta; Magnoliopsida; eudicotyledons; Gunneridae; Pentapetalae; rosids; malvids; Brassicales; Brassicaceae; Camelineae; Arabidopsis`PHL3_ARATH^PHL3_ARATH^Q:1258-1689,H:141-289^48.387%ID^E:2.59e-31^…	1.68125	1.4783	-0.400947	0.592816	0.426792	-0.18536	-5.07337	-3.17033	-3.98252	0.952985	0.535732	0.578253	1.51174	0.816344	0.607514	1.72416	1.90665
1	Ntome_NODE_10724_length_2105_cov_50	SIP12_MAIZE^SIP12_MAIZE^Q:1719-1838,H:192-231^80%ID^E:1.11e-13^RecName: Full=Aquaporin SIP1-2;^Eukaryota; Viridiplantae; Streptophyta; Embryophyta; Tracheophyta; Spermatophyta; Magnoliopsida; Liliopsida; Poales; Poaceae; PACMAD clade; Panicoideae; Andropogonodae; Andropogoneae; Tripsacinae; Zea	0.563969	0.481573	-0.593715	-0.365162	-0.277783	0.861479	-3.68993	-2.10971	-3.12165	0.840413	0.180981	0.078319	1.56509	0.842565	0.663281	1.41787	2.66241
1	Ntome_NODE_10725_length_2105_cov_10	.	0.830126	1.10065	-1.16987	-1.58973	-2.16987	-0.847946	-2.16987	-2.16987	-3.16987	2.53306	2.28562	1.95941	0.7936	1.05586	0.773109	0.540519	1.41509
1	Ntome_NODE_10726_length_2104_cov_280	TI442_ARATH^TI442_ARATH^Q:782-1645,H:183-469^64.483%ID^E:3.06e-136^RecName: Full=Mitochondrial import inner membrane translocase subunit TIM44-2;^Eukaryota; Viridiplantae; Streptophyta; Embryophyta; Tracheophyta; Spermatophyta; Magnoliopsida; eudicotyledons; Gunneridae; Pentapetalae; rosids; malvids; Brassicales; Brassicaceae; Camelineae; Arabidopsis`TI442_ARATH^TI442_ARATH^Q:158-589,H:1-138^57.9…	0.485924	0.256728	-0.74831	-0.191315	-0.513267	-0.160912	-2.10234	-2.53266	-3.01105	0.513944	0.511685	0.114032	1.40566	1.14204	0.537354	1.81412	2.47836
1	Ntome_NODE_10727_length_2104_cov_235	.	-0.866774	0.785303	0.647799	-0.214697	0.325871	0.0263111	-3.67413	-3.67413	-3.67413	1.4954	0.325871	1.28007	1.27727	0.863167	1.61127	1.81772	1.6478
1	Ntome_NODE_10729_length_2104_cov_218	.	0.620233	0.474199	1.00965	0.399188	-0.184812	0.51136	-4.06313	-3.2413	-5.82867	1.07738	0.456734	1.66198	1.76498	0.528884	1.2166	1.80796	1.78876
1	Ntome_NODE_1073_length_4993_cov_299	GTE10_ARATH^GTE10_ARATH^Q:4141-1970,H:1-716^50.738%ID^E:2.4e-134^RecName: Full=Transcription factor GTE10;^Eukaryota; Viridiplantae; Streptophyta; Embryophyta; Tracheophyta; Spermatophyta; Magnoliopsida; eudicotyledons; Gunneridae; Pentapetalae; rosids; malvids; Brassicales; Brassicaceae; Camelineae; Arabidopsis	1.1314	0.812694	-0.165931	1.0442	0.611672	1.12143	-6.04089	-6.4841	-6.44371	1.47939	1.16666	1.17711	1.84139	1.48441	1.35588	2.64177	3.26663
1	Ntome_NODE_10731_length_2104_cov_126	POLX_TOBAC^POLX_TOBAC^Q:7-705,H:1097-1328^57.94%ID^E:4.84e-87^RecName: Full=Retrovirus-related Pol polyprotein from transposon TNT 1-94;^Eukaryota; Viridiplantae; Streptophyta; Embryophyta; Tracheophyta; Spermatophyta; Magnoliopsida; eudicotyledons; Gunneridae; Pentapetalae; asterids; lamiids; Solanales; Solanaceae; Nicotianoideae; Nicotianeae; Nicotiana	2.59266	2.10589	1.61019	2.53556	1.86922	1.34716	-1.97477	-1.97477	-0.974769	-1.97477	-1.97477	-0.918185	-0.463807	0.312113	0.832586	-1.97477	-0.974769
1	Ntome_NODE_10734_length_2103_cov_297	SIPL2_ORYSJ^SIPL2_ORYSJ^Q:326-1756,H:44-533^53.564%ID^E:6.98e-167^RecName: Full=Signal peptide peptidase-like 2;^Eukaryota; Viridiplantae; Streptophyta; Embryophyta; Tracheophyta; Spermatophyta; Magnoliopsida; Liliopsida; Poales; Poaceae; BOP clade; Oryzoideae; Oryzeae; Oryzinae; Oryza; Oryza sativa	1.22717	0.96168	-0.11776	0.201903	-0.467606	-0.181046	-3.1835	-2.53273	-2.31833	0.338271	-0.144481	0.170601	0.857366	0.952762	0.232708	1.74644	2.25654
1	Ntome_NODE_10735_length_2103_cov_262	PME21_SOLLC^PME21_SOLLC^Q:63-1739,H:1-550^78.571%ID^E:0^RecName: Full=Pectinesterase 2.1;^Eukaryota; Viridiplantae; Streptophyta; Embryophyta; Tracheophyta; Spermatophyta; Magnoliopsida; eudicotyledons; Gunneridae; Pentapetalae; asterids; lamiids; Solanales; Solanaceae; Solanoideae; Solaneae; Solanum; Lycopersicon	2.84911	2.97748	1.79232	1.4576	0.897783	1.26673	-4.51265	-6.0616	-6.87152	0.586808	0.157282	0.219578	0.486191	1.44566	0.306252	0.93396	2.06902
1	Ntome_NODE_10736_length_2103_cov_221	CFXQ_CYAM1^CFXQ_CYAM1^Q:1283-669,H:19-219^38.942%ID^E:5.58e-40^RecName: Full=Ribulose bisphosphate carboxylase/oxygenase activase, chloroplastic {ECO:0000303|PubMed:27872295};^Eukaryota; Rhodophyta; Bangiophyceae; Cyanidiales; Cyanidiaceae; Cyanidioschyzon	0.857872	2.16345	-0.0665172	0.20932	0.607363	0.354259	-5.69733	-5.69733	-5.69733	2.69292	0.993645	0.633587	1.09851	1.71613	1.08626	2.03738	2.70781
1	Ntome_NODE_10737_length_2103_cov_83	.	1.27078	1.09822	0.228332	0.225014	0.578835	-0.020255	-3.86275	-2.16113	-3.13609	0.925036	1.1597	0.145887	0.0899542	0.679	0.144291	1.00493	1.63024
1	Ntome_NODE_10739_length_2103_cov_70	.	1.01596	0.744654	0.587112	-0.0258646	-0.528365	0.208601	-1.52836	-2.11333	-4.11333	0.694027	0.1346	-0.0258646	0.64156	0.27899	0.0565975	1.69403	2.27899
1	Ntome_NODE_1074_length_4992_cov_130	ELF6_ARATH^ELF6_ARATH^Q:328-2211,H:1-615^61.897%ID^E:0^RecName: Full=Probable lysine-specific demethylase ELF6;^Eukaryota; Viridiplantae; Streptophyta; Embryophyta; Tracheophyta; Spermatophyta; Magnoliopsida; eudicotyledons; Gunneridae; Pentapetalae; rosids; malvids; Brassicales; Brassicaceae; Camelineae; Arabidopsis`ELF6_ARATH^ELF6_ARATH^Q:4027-4605,H:1142-1339^56.281%ID^E:3.37e-59^RecName: Full…	1.81688	1.62082	0.603099	-0.0983266	-0.470259	0.00730159	-4.08556	-5.66087	-5.66087	1.26346	1.29634	0.370124	1.39961	1.24313	1.34351	2.33348	2.67813
1	Ntome_NODE_10741_length_2102_cov_298	NOP5B_ARATH^NOP5B_ARATH^Q:1909-572,H:2-447^83.184%ID^E:0^RecName: Full=Probable nucleolar protein 5-2;^Eukaryota; Viridiplantae; Streptophyta; Embryophyta; Tracheophyta; Spermatophyta; Magnoliopsida; eudicotyledons; Gunneridae; Pentapetalae; rosids; malvids; Brassicales; Brassicaceae; Camelineae; Arabidopsis	2.44805	2.00478	1.37739	1.29694	0.642235	1.74406	-6.37706	-4.67273	-6.42205	0.554556	0.681166	0.723046	1.08639	0.399861	-0.784868	1.95458	3.34365
1	Ntome_NODE_10743_length_2102_cov_163	.	2.24244	1.80582	0.627895	1.47173	1.39944	0.666346	-7.21935	-6.04303	-7.21935	1.48687	1.39035	0.969337	1.52921	1.31472	0.849052	2.25029	2.47824
1	Ntome_NODE_10744_length_2102_cov_98	TXN4B_HUMAN^TXN4B_HUMAN^Q:787-1239,H:1-149^58.94%ID^E:4.65e-56^RecName: Full=Thioredoxin-like protein 4B;^Eukaryota; Metazoa; Chordata; Craniata; Vertebrata; Euteleostomi; Mammalia; Eutheria; Euarchontoglires; Primates; Haplorrhini; Catarrhini; Hominidae; Homo	0.631415	0.645774	-1.30305	-0.998192	-1.06858	-0.436778	-1.80795	-1.22058	-2.80314	1.13321	0.586771	0.586771	1.80926	1.45486	0.364378	0.540228	1.88562
1	Ntome_NODE_10745_length_2102_cov_83	PHL7_ARATH^PHL7_ARATH^Q:327-1,H:9-116^76.147%ID^E:1.14e-39^RecName: Full=Myb family transcription factor PHL7 {ECO:0000305};^Eukaryota; Viridiplantae; Streptophyta; Embryophyta; Tracheophyta; Spermatophyta; Magnoliopsida; eudicotyledons; Gunneridae; Pentapetalae; rosids; malvids; Brassicales; Brassicaceae; Camelineae; Arabidopsis	1.29107	1.04957	-1.27046	0.0488888	-0.971327	-0.77319	-2.1793	-2.26304	-2.90993	1.02826	0.878472	0.732072	1.01984	0.392679	0.971429	1.09757	1.85741
1	Ntome_NODE_10746_length_2101_cov_292	MLO6_ARATH^MLO6_ARATH^Q:342-1886,H:6-546^56.284%ID^E:0^RecName: Full=MLO-like protein 6;^Eukaryota; Viridiplantae; Streptophyta; Embryophyta; Tracheophyta; Spermatophyta; Magnoliopsida; eudicotyledons; Gunneridae; Pentapetalae; rosids; malvids; Brassicales; Brassicaceae; Camelineae; Arabidopsis	3.39109	2.47547	1.15937	1.66264	1.07505	1.35422	-6.83832	-6.83832	-6.83832	0.952714	0.62684	0.739035	1.13776	0.844044	0.694466	2.01988	2.38237
1	Ntome_NODE_10747_length_2101_cov_277	HTSF1_MOUSE^HTSF1_MOUSE^Q:1344-568,H:95-356^38.346%ID^E:1.5e-33^RecName: Full=HIV Tat-specific factor 1 homolog;^Eukaryota; Metazoa; Chordata; Craniata; Vertebrata; Euteleostomi; Mammalia; Eutheria; Euarchontoglires; Glires; Rodentia; Myomorpha; Muroidea; Muridae; Murinae; Mus; Mus	1.17448	1.06519	0.0550625	-0.0658282	-0.305851	-0.176568	-2.58613	-1.85829	-2.87245	0.71184	0.15134	0.384777	0.996632	0.947513	-0.0565752	0.795573	1.63929
1	Ntome_NODE_10748_length_2101_cov_163	CARME_HUMAN^CARME_HUMAN^Q:880-1653,H:154-407^47.692%ID^E:7.97e-79^RecName: Full=Carnosine N-methyltransferase {ECO:0000303|PubMed:26001783, ECO:0000312|HGNC:HGNC:23435};^Eukaryota; Metazoa; Chordata; Craniata; Vertebrata; Euteleostomi; Mammalia; Eutheria; Euarchontoglires; Primates; Haplorrhini; Catarrhini; Hominidae; Homo	1.87411	1.7973	0.0195751	1.1472	-0.248624	0.345319	-5.55241	-5.55241	-4.55241	1.14595	0.921382	0.219217	1.54394	1.58325	0.827666	1.88064	2.60029
1	Ntome_NODE_10749_length_2101_cov_125	SHH2_ARATH^SHH2_ARATH^Q:644-345,H:173-272^57%ID^E:8.33e-31^RecName: Full=Protein SAWADEE HOMEODOMAIN HOMOLOG 2;^Eukaryota; Viridiplantae; Streptophyta; Embryophyta; Tracheophyta; Spermatophyta; Magnoliopsida; eudicotyledons; Gunneridae; Pentapetalae; rosids; malvids; Brassicales; Brassicaceae; Camelineae; Arabidopsis	1.54478	1.78742	-0.0755758	1.03494	0.326344	0.572392	-2.4465	-1.81508	-1.77171	-1.86154	-1.57394	-3.22336	1.71069	0.880925	0.690108	1.92696	2.29315
1	Ntome_NODE_1075_length_4991_cov_66	GPX4_ARATH^GPX4_ARATH^Q:254-568,H:1-105^76.19%ID^E:9.92e-51^RecName: Full=Probable glutathione peroxidase 4;^Eukaryota; Viridiplantae; Streptophyta; Embryophyta; Tracheophyta; Spermatophyta; Magnoliopsida; eudicotyledons; Gunneridae; Pentapetalae; rosids; malvids; Brassicales; Brassicaceae; Camelineae; Arabidopsis	1.47034	1.74948	0.353975	0.388988	0.046621	0.520354	-5.07086	-4.0078	-3.70659	0.9071	0.785637	0.679927	1.2368	1.01777	1.1209	0.630522	1.87683
1	Ntome_NODE_10751_length_2100_cov_274	UBXN6_HUMAN^UBXN6_HUMAN^Q:1166-1357,H:163-226^45.312%ID^E:1.98e-09^RecName: Full=UBX domain-containing protein 6 {ECO:0000305};^Eukaryota; Metazoa; Chordata; Craniata; Vertebrata; Euteleostomi; Mammalia; Eutheria; Euarchontoglires; Primates; Haplorrhini; Catarrhini; Hominidae; Homo	1.64283	1.47639	1.03348	0.600925	0.370853	1.08227	-6.64797	-7.29104	-7.26493	1.39947	1.76429	1.32609	2.20659	1.24787	1.28044	2.95361	2.81882
1	Ntome_NODE_10752_length_2100_cov_272	PS12A_ARATH^PS12A_ARATH^Q:1917-601,H:1-439^82.232%ID^E:0^RecName: Full=26S proteasome non-ATPase regulatory subunit 12 homolog A;^Eukaryota; Viridiplantae; Streptophyta; Embryophyta; Tracheophyta; Spermatophyta; Magnoliopsida; eudicotyledons; Gunneridae; Pentapetalae; rosids; malvids; Brassicales; Brassicaceae; Camelineae; Arabidopsis	1.73397	1.75233	0.386074	0.521377	0.0204751	0.38306	-3.56139	-2.32282	-5.06285	0.305831	0.190371	0.0416604	1.0464	0.506862	-0.246756	1.84841	2.457
1	Ntome_NODE_10754_length_2100_cov_164	.	1.85732	1.68651	0.160973	0.632594	-0.286486	0.141607	-5.06785	-5.05349	-4.34538	0.976548	0.839044	0.486743	1.66686	0.397149	0.432319	2.40383	3.07171
1	Ntome_NODE_10755_length_2100_cov_147	.	1.74635	2.08081	-0.492182	0.376458	1.15947	-0.0863315	-3.13615	-3.17813	-3.81809	0.962789	0.871246	0.596396	1.81315	0.644157	-0.490859	0.543129	0.407778
1	Ntome_NODE_10756_length_2100_cov_144	B2_DAUCA^B2_DAUCA^Q:724-867,H:49-96^89.583%ID^E:9.47e-21^RecName: Full=B2 protein;^Eukaryota; Viridiplantae; Streptophyta; Embryophyta; Tracheophyta; Spermatophyta; Magnoliopsida; eudicotyledons; Gunneridae; Pentapetalae; asterids; campanulids; Apiales; Apiaceae; Apioideae; Scandiceae; Daucinae; Daucus; Daucus sect. Daucus	2.03095	1.91274	1.16101	0.737311	1.23982	1.026	-7.55924	-6.65096	-6.21449	1.62932	0.980482	0.861591	1.6422	1.25681	1.35119	2.39137	2.20391
1	Ntome_NODE_10757_length_2100_cov_143	ERA_ARATH^ERA_ARATH^Q:1761-754,H:93-427^83.929%ID^E:1.99e-159^RecName: Full=GTPase ERA-like, chloroplastic {ECO:0000305};^Eukaryota; Viridiplantae; Streptophyta; Embryophyta; Tracheophyta; Spermatophyta; Magnoliopsida; eudicotyledons; Gunneridae; Pentapetalae; rosids; malvids; Brassicales; Brassicaceae; Camelineae; Arabidopsis	1.4317	1.05209	0.214364	-0.223962	-0.534491	0.413318	-4.82022	-4.51356	-4.23948	1.0666	1.60634	0.697279	1.46608	0.786723	0.386497	2.37134	2.83937
1	Ntome_NODE_10758_length_2100_cov_118	RQL3_ARATH^RQL3_ARATH^Q:2004-43,H:1-638^68.244%ID^E:0^RecName: Full=ATP-dependent DNA helicase Q-like 3;^Eukaryota; Viridiplantae; Streptophyta; Embryophyta; Tracheophyta; Spermatophyta; Magnoliopsida; eudicotyledons; Gunneridae; Pentapetalae; rosids; malvids; Brassicales; Brassicaceae; Camelineae; Arabidopsis	1.11287	1.22951	-0.701151	-0.813408	0.336241	0.223575	-1.54111	-1.84156	-2.27808	0.041927	-0.377612	-1.54111	0.891314	0.797456	0.856692	1.26624	2.3382
1	Ntome_NODE_10760_length_2100_cov_11	Y5487_ARATH^Y5487_ARATH^Q:2100-232,H:272-892^69.502%ID^E:0^RecName: Full=Probable LRR receptor-like serine/threonine-protein kinase At5g48740;^Eukaryota; Viridiplantae; Streptophyta; Embryophyta; Tracheophyta; Spermatophyta; Magnoliopsida; eudicotyledons; Gunneridae; Pentapetalae; rosids; malvids; Brassicales; Brassicaceae; Camelineae; Arabidopsis	1.56195	2.45275	1.94714	1.1247	0.777641	-0.491809	-3.71677	-3.71677	-3.71677	1.73674	0.794187	-0.217248	0.98422	-1.49027	-3.71677	1.86518	3.82192
1	Ntome_NODE_10761_length_2099_cov_294	SSY3_SOLTU^SSY3_SOLTU^Q:287-2098,H:1-591^78.311%ID^E:0^RecName: Full=Soluble starch synthase 3, chloroplastic/amyloplastic;^Eukaryota; Viridiplantae; Streptophyta; Embryophyta; Tracheophyta; Spermatophyta; Magnoliopsida; eudicotyledons; Gunneridae; Pentapetalae; asterids; lamiids; Solanales; Solanaceae; Solanoideae; Solaneae; Solanum`SSY3_SOLTU^SSY3_SOLTU^Q:1322-2092,H:508-751^23.954%ID^E:4.43e-1…	1.90608	1.62754	0.890975	0.183865	0.288795	0.869954	-6.81962	-5.77698	-6.81962	1.19824	1.23506	1.00311	1.98863	1.47007	1.18544	2.566	3.00247
1	Ntome_NODE_10762_length_2099_cov_291	DGK7_ARATH^DGK7_ARATH^Q:266-1621,H:42-492^66.887%ID^E:0^RecName: Full=Diacylglycerol kinase 7;^Eukaryota; Viridiplantae; Streptophyta; Embryophyta; Tracheophyta; Spermatophyta; Magnoliopsida; eudicotyledons; Gunneridae; Pentapetalae; rosids; malvids; Brassicales; Brassicaceae; Camelineae; Arabidopsis	1.52179	1.5673	0.572217	0.505145	0.349878	0.432766	-6.04684	-6.11754	-7.24847	1.56419	1.55165	1.4388	1.51125	1.46687	1.76491	2.82314	2.34296
1	Ntome_NODE_10763_length_2099_cov_272	PUB9_ARATH^PUB9_ARATH^Q:305-1678,H:1-460^60.73%ID^E:0^RecName: Full=U-box domain-containing protein 9;^Eukaryota; Viridiplantae; Streptophyta; Embryophyta; Tracheophyta; Spermatophyta; Magnoliopsida; eudicotyledons; Gunneridae; Pentapetalae; rosids; malvids; Brassicales; Brassicaceae; Camelineae; Arabidopsis	0.1553	1.40055	-0.0308569	0.0706078	-0.0730268	0.328155	-2.38647	-3.63166	-2.8708	2.29607	0.477741	0.121996	1.09604	0.716252	0.88126	0.28906	1.15979
1	Ntome_NODE_10764_length_2099_cov_256	PPA18_ARATH^PPA18_ARATH^Q:385-1698,H:6-437^74.429%ID^E:0^RecName: Full=Purple acid phosphatase 18;^Eukaryota; Viridiplantae; Streptophyta; Embryophyta; Tracheophyta; Spermatophyta; Magnoliopsida; eudicotyledons; Gunneridae; Pentapetalae; rosids; malvids; Brassicales; Brassicaceae; Camelineae; Arabidopsis	2.41117	1.9216	-0.249113	0.78162	0.326326	0.318092	-6.42495	-6.52298	-7.87912	1.7922	1.73853	1.53526	1.48551	1.66738	1.46872	2.67162	2.95813
1	Ntome_NODE_10765_length_2099_cov_232	GT7_ARATH^GT7_ARATH^Q:1587-265,H:1-431^60.86%ID^E:0^RecName: Full=Putative glycosyltransferase 7;^Eukaryota; Viridiplantae; Streptophyta; Embryophyta; Tracheophyta; Spermatophyta; Magnoliopsida; eudicotyledons; Gunneridae; Pentapetalae; rosids; malvids; Brassicales; Brassicaceae; Camelineae; Arabidopsis	2.67666	2.04416	0.830834	1.47546	0.79	0.812882	-6.31201	-7.40962	-5.76346	-0.119328	-0.279619	-0.688935	2.28953	2.42456	0.956393	2.69366	3.57883
1	Ntome_NODE_10766_length_2099_cov_225	PAH2_ARATH^PAH2_ARATH^Q:1299-631,H:685-912^70.614%ID^E:3.98e-105^RecName: Full=Phosphatidate phosphatase PAH2;^Eukaryota; Viridiplantae; Streptophyta; Embryophyta; Tracheophyta; Spermatophyta; Magnoliopsida; eudicotyledons; Gunneridae; Pentapetalae; rosids; malvids; Brassicales; Brassicaceae; Camelineae; Arabidopsis`PAH2_ARATH^PAH2_ARATH^Q:1599-1306,H:1-98^66.327%ID^E:1.79e-31^RecName: Full=Phosp…	1.59244	1.15469	0.260148	0.0469625	0.323997	0.094409	-3.90298	-4.30841	-3.65827	-0.360679	0.0363198	-0.323381	1.86994	1.1226	1.32743	2.75571	1.96906
1	Ntome_NODE_10768_length_2099_cov_117	GCT23_ARATH^GCT23_ARATH^Q:162-710,H:1-184^57.895%ID^E:6.54e-66^RecName: Full=Gamma-glutamylcyclotransferase 2-3 {ECO:0000305};^Eukaryota; Viridiplantae; Streptophyta; Embryophyta; Tracheophyta; Spermatophyta; Magnoliopsida; eudicotyledons; Gunneridae; Pentapetalae; rosids; malvids; Brassicales; Brassicaceae; Camelineae; Arabidopsis`GCT23_ARATH^GCT23_ARATH^Q:1606-1743,H:138-183^69.565%ID^E:3.99e-1…	1.82655	1.76624	0.496991	0.314145	-0.484358	0.0187074	-3.10405	-4.87805	-4.87805	0.803119	1.12308	0.810132	1.90055	0.412154	-0.654626	1.77601	2.75145
1	Ntome_NODE_10769_length_2099_cov_95	TOPB1_MOUSE^TOPB1_MOUSE^Q:431-697,H:200-285^40%ID^E:5.14e-10^RecName: Full=DNA topoisomerase 2-binding protein 1;^Eukaryota; Metazoa; Chordata; Craniata; Vertebrata; Euteleostomi; Mammalia; Eutheria; Euarchontoglires; Glires; Rodentia; Myomorpha; Muroidea; Muridae; Murinae; Mus; Mus	1.26232	1.74341	0.570977	0.0910915	-0.0279326	0.487794	-5.15722	-5.15722	-5.15722	1.1931	1.25709	1.38194	1.79826	0.641613	1.11909	2.38272	1.57016
1	Ntome_NODE_1077_length_4989_cov_102	PHO32_ARATH^PHO32_ARATH^Q:4662-4171,H:46-210^67.879%ID^E:8.27e-60^RecName: Full=Universal stress protein PHOS32 {ECO:0000303|PubMed:12644671};^Eukaryota; Viridiplantae; Streptophyta; Embryophyta; Tracheophyta; Spermatophyta; Magnoliopsida; eudicotyledons; Gunneridae; Pentapetalae; rosids; malvids; Brassicales; Brassicaceae; Camelineae; Arabidopsis	1.74129	1.64788	0.783607	0.606062	0.80398	0.374424	-5.18814	-5.7849	-5.77781	1.15507	0.858742	0.840934	1.75043	0.995942	0.802355	2.22924	2.1609
1	Ntome_NODE_10770_length_2099_cov_87	PMT9_ARATH^PMT9_ARATH^Q:1481-1771,H:508-604^64.948%ID^E:7.75e-33^RecName: Full=Probable methyltransferase PMT9;^Eukaryota; Viridiplantae; Streptophyta; Embryophyta; Tracheophyta; Spermatophyta; Magnoliopsida; eudicotyledons; Gunneridae; Pentapetalae; rosids; malvids; Brassicales; Brassicaceae; Camelineae; Arabidopsis	1.05489	0.950109	-0.0498912	-0.238694	-1.37182	0.997415	-3.37182	-3.37182	-2.95678	1.13386	-0.00258544	1.24916	1.61883	0.901199	-0.43322	1.04705	2.84412
1	Ntome_NODE_10772_length_2099_cov_39	FIGL1_ARATH^FIGL1_ARATH^Q:2071-104,H:48-680^64.024%ID^E:0^RecName: Full=ATPase family AAA domain-containing protein FIGL1 {ECO:0000305};^Eukaryota; Viridiplantae; Streptophyta; Embryophyta; Tracheophyta; Spermatophyta; Magnoliopsida; eudicotyledons; Gunneridae; Pentapetalae; rosids; malvids; Brassicales; Brassicaceae; Camelineae; Arabidopsis	1.18719	1.55728	0.614301	-0.513855	0.237232	0.402291	-2.97066	-2.97066	-2.97066	-1.97066	0.751805	-0.136759	1.11085	0.196054	1.27346	1.78423	2.41856
1	Ntome_NODE_10773_length_2099_cov_7	LAC17_ARATH^LAC17_ARATH^Q:157-1863,H:3-577^78.783%ID^E:0^RecName: Full=Laccase-17;^Eukaryota; Viridiplantae; Streptophyta; Embryophyta; Tracheophyta; Spermatophyta; Magnoliopsida; eudicotyledons; Gunneridae; Pentapetalae; rosids; malvids; Brassicales; Brassicaceae; Camelineae; Arabidopsis	1.60198	1.40044	-0.159875	0.0144052	-0.284722	-0.0486825	-2.52366	-2.03284	-2.20414	0.189289	-0.479841	-0.22706	0.559647	-0.263389	-0.624473	1.82168	3.26126
1	Ntome_NODE_10774_length_2098_cov_310	MAOX_VITVI^MAOX_VITVI^Q:25-1797,H:1-591^82.064%ID^E:0^RecName: Full=NADP-dependent malic enzyme;^Eukaryota; Viridiplantae; Streptophyta; Embryophyta; Tracheophyta; Spermatophyta; Magnoliopsida; eudicotyledons; Gunneridae; Pentapetalae; rosids; Vitales; Vitaceae; Viteae; Vitis	3.10509	2.31749	0.764208	0.920027	0.715211	0.572776	-5.35116	-5.30838	-5.89916	0.582963	0.649357	0.609376	0.949255	0.908748	0.238538	1.87234	2.35332
1	Ntome_NODE_10775_length_2098_cov_290	ASNS3_ARATH^ASNS3_ARATH^Q:1965-289,H:1-560^86.964%ID^E:0^RecName: Full=Asparagine synthetase [glutamine-hydrolyzing] 3;^Eukaryota; Viridiplantae; Streptophyta; Embryophyta; Tracheophyta; Spermatophyta; Magnoliopsida; eudicotyledons; Gunneridae; Pentapetalae; rosids; malvids; Brassicales; Brassicaceae; Camelineae; Arabidopsis	2.4378	2.37936	0.91948	1.09803	0.722262	1.23009	-6.96634	-6.96634	-6.96634	1.22047	0.611393	1.04332	1.45139	0.979925	0.615239	2.69198	3.49828
1	Ntome_NODE_10776_length_2098_cov_278	Y1154_ARATH^Y1154_ARATH^Q:369-1736,H:1-444^76.471%ID^E:0^RecName: Full=Probable serine/threonine-protein kinase At1g01540;^Eukaryota; Viridiplantae; Streptophyta; Embryophyta; Tracheophyta; Spermatophyta; Magnoliopsida; eudicotyledons; Gunneridae; Pentapetalae; rosids; malvids; Brassicales; Brassicaceae; Camelineae; Arabidopsis	1.63676	1.54446	0.0734275	1.61165	1.16257	1.079	-6.31674	-8.03044	-6.9261	0.369417	0.821062	-0.10812	2.43944	2.21684	2.18471	2.75828	3.48378
1	Ntome_NODE_10779_length_2098_cov_204	FB345_ARATH^FB345_ARATH^Q:1438-521,H:1-313^48.889%ID^E:3.87e-88^RecName: Full=F-box protein At4g00755;^Eukaryota; Viridiplantae; Streptophyta; Embryophyta; Tracheophyta; Spermatophyta; Magnoliopsida; eudicotyledons; Gunneridae; Pentapetalae; rosids; malvids; Brassicales; Brassicaceae; Camelineae; Arabidopsis	0.264511	0.0425868	-0.574887	-0.168008	-0.476962	0.284251	-3.1938	-2.82164	-2.54041	0.994333	1.23467	0.846595	1.45541	0.169575	0.0331524	2.07908	2.37154
1	Ntome_NODE_1078_length_4987_cov_104	NRPC1_ARATH^NRPC1_ARATH^Q:4770-622,H:7-1376^63.278%ID^E:0^RecName: Full=DNA-directed RNA polymerase III subunit 1 {ECO:0000305};^Eukaryota; Viridiplantae; Streptophyta; Embryophyta; Tracheophyta; Spermatophyta; Magnoliopsida; eudicotyledons; Gunneridae; Pentapetalae; rosids; malvids; Brassicales; Brassicaceae; Camelineae; Arabidopsis	0.961362	0.712083	-0.555989	0.046964	-0.148129	0.191798	-3.62303	-4.71705	-5.83351	1.38119	1.25564	1.32564	2.19214	1.91302	1.08704	1.28754	2.5233
1	Ntome_NODE_10780_length_2098_cov_159	TGD3_ARATH^TGD3_ARATH^Q:1601-666,H:39-345^77.955%ID^E:4.06e-169^RecName: Full=Protein TRIGALACTOSYLDIACYLGLYCEROL 3, chloroplastic {ECO:0000303|PubMed:17938172};^Eukaryota; Viridiplantae; Streptophyta; Embryophyta; Tracheophyta; Spermatophyta; Magnoliopsida; eudicotyledons; Gunneridae; Pentapetalae; rosids; malvids; Brassicales; Brassicaceae; Camelineae; Arabidopsis	1.87221	1.54843	0.565162	0.606942	-0.00196107	0.517951	-5.58722	-5.58722	-5.58722	0.920095	0.984604	0.805952	2.07719	1.08605	1.1682	1.95967	2.65118
1	Ntome_NODE_10782_length_2098_cov_137	.	1.78314	0.904677	0.438038	-0.0827417	-0.108894	0.531862	-5.14452	-5.14452	-5.14452	0.571101	0.953093	0.911632	1.99278	1.32504	1.06708	2.47709	2.66965
1	Ntome_NODE_10784_length_2098_cov_85	ATL52_ARATH^ATL52_ARATH^Q:1472-486,H:4-362^41.953%ID^E:8.88e-62^RecName: Full=RING-H2 finger protein ATL52;^Eukaryota; Viridiplantae; Streptophyta; Embryophyta; Tracheophyta; Spermatophyta; Magnoliopsida; eudicotyledons; Gunneridae; Pentapetalae; rosids; malvids; Brassicales; Brassicaceae; Camelineae; Arabidopsis	0.315923	0.452946	0.984262	-0.198902	-0.0146283	-0.201424	-3.71618	-3.71618	-3.71618	1.43641	1.738	0.070419	1.55061	1.14131	-0.47129	1.56922	2.77568
1	Ntome_NODE_10786_length_2098_cov_12	RHIE_DICD3^RHIE_DICD3^Q:345-2042,H:89-577^25.043%ID^E:3.1e-36^RecName: Full=Rhamnogalacturonate lyase;^Bacteria; Proteobacteria; Gammaproteobacteria; Enterobacterales; Pectobacteriaceae; Dickeya	1.74358	1.29094	-0.0940316	0.549825	0.611578	0.12733	-3.67899	-2.67899	-3.67899	1.09711	0.844568	1.23126	1.42618	-0.457117	-0.578016	0.713323	1.53046
1	Ntome_NODE_10787_length_2097_cov_304	AB9C_ARATH^AB9C_ARATH^Q:2093-3,H:681-1372^74.355%ID^E:0^RecName: Full=ABC transporter C family member 9;^Eukaryota; Viridiplantae; Streptophyta; Embryophyta; Tracheophyta; Spermatophyta; Magnoliopsida; eudicotyledons; Gunneridae; Pentapetalae; rosids; malvids; Brassicales; Brassicaceae; Camelineae; Arabidopsis`AB9C_ARATH^AB9C_ARATH^Q:2075-1593,H:1324-1483^27.711%ID^E:1.55e-10^RecName: Full=ABC tr…	2.96522	2.64731	1.77343	0.861931	0.289727	1.19177	-7.99378	-6.90292	-7.99378	1.44682	0.955844	1.22827	1.66166	1.44402	1.3162	2.28337	2.82492
1	Ntome_NODE_10788_length_2097_cov_235	YTX2_XENLA^YTX2_XENLA^Q:1272-91,H:109-516^25.234%ID^E:5.06e-13^RecName: Full=Transposon TX1 uncharacterized 149 kDa protein;^Eukaryota; Metazoa; Chordata; Craniata; Vertebrata; Euteleostomi; Amphibia; Batrachia; Anura; Pipoidea; Pipidae; Xenopodinae; Xenopus; Xenopus	1.8992	1.73742	1.38237	-0.233331	-0.27286	0.311836	-5.44278	-5.44278	-5.44278	1.57658	0.880766	0.91635	1.83306	1.39226	0.830918	1.52358	2.55021
1	Ntome_NODE_1079_length_4986_cov_273	CHR8_ARATH^CHR8_ARATH^Q:562-4176,H:6-1187^64.036%ID^E:0^RecName: Full=Protein CHROMATIN REMODELING 8 {ECO:0000303|PubMed:16547115};^Eukaryota; Viridiplantae; Streptophyta; Embryophyta; Tracheophyta; Spermatophyta; Magnoliopsida; eudicotyledons; Gunneridae; Pentapetalae; rosids; malvids; Brassicales; Brassicaceae; Camelineae; Arabidopsis	1.21765	1.4182	0.210356	0.0975895	0.157575	-0.151029	-4.46031	-4.61683	-4.26221	1.16005	0.74669	0.592692	1.1949	1.44163	1.2164	1.95134	2.08531
1	Ntome_NODE_10790_length_2097_cov_190	TRM11_CHICK^TRM11_CHICK^Q:487-1569,H:60-420^40.374%ID^E:7.18e-73^RecName: Full=tRNA (guanine(10)-N2)-methyltransferase homolog;^Eukaryota; Metazoa; Chordata; Craniata; Vertebrata; Euteleostomi; Archelosauria; Archosauria; Dinosauria; Saurischia; Theropoda; Coelurosauria; Aves; Neognathae; Galloanserae; Galliformes; Phasianidae; Phasianinae; Gallus	2.0736	1.45971	0.00137552	0.715842	-0.396881	0.557612	-5.06415	-4.63745	-4.60302	1.04179	0.645086	0.93877	1.0811	1.22951	0.547685	1.82071	2.58871
1	Ntome_NODE_10791_length_2097_cov_126	PTR16_ARATH^PTR16_ARATH^Q:140-1816,H:23-573^75.179%ID^E:0^RecName: Full=Protein NRT1/ PTR FAMILY 4.3;^Eukaryota; Viridiplantae; Streptophyta; Embryophyta; Tracheophyta; Spermatophyta; Magnoliopsida; eudicotyledons; Gunneridae; Pentapetalae; rosids; malvids; Brassicales; Brassicaceae; Camelineae; Arabidopsis	1.83517	1.76657	0.513498	0.942269	0.237104	0.62569	-2.91245	-4.01006	-4.01006	0.50153	0.0663237	-0.0100643	0.633792	-0.3593	-0.723183	2.64815	2.25503
1	Ntome_NODE_10792_length_2097_cov_112	SMH5_MAIZE^SMH5_MAIZE^Q:1596-1742,H:6-56^49.02%ID^E:2.93e-07^RecName: Full=Single myb histone 5;^Eukaryota; Viridiplantae; Streptophyta; Embryophyta; Tracheophyta; Spermatophyta; Magnoliopsida; Liliopsida; Poales; Poaceae; PACMAD clade; Panicoideae; Andropogonodae; Andropogoneae; Tripsacinae; Zea	1.92661	1.70602	0.272124	0.329832	0.450582	-0.423833	-5.0118	-3.34277	-5.0118	1.21817	0.458088	0.361851	1.14322	0.979838	1.39929	1.66909	1.87548
1	Ntome_NODE_10794_length_2096_cov_296	CER1_ARATH^CER1_ARATH^Q:50-1888,H:1-620^62.742%ID^E:0^RecName: Full=Very-long-chain aldehyde decarbonylase CER1 {ECO:0000305};^Eukaryota; Viridiplantae; Streptophyta; Embryophyta; Tracheophyta; Spermatophyta; Magnoliopsida; eudicotyledons; Gunneridae; Pentapetalae; rosids; malvids; Brassicales; Brassicaceae; Camelineae; Arabidopsis	2.45034	2.7061	1.18769	0.152682	0.0136798	0.803391	-3.51216	-3.44479	-5.53961	0.878844	0.994479	-0.0651042	1.16755	-0.758133	-1.23392	1.84477	2.3542
1	Ntome_NODE_10795_length_2096_cov_254	Y3272_ARATH^Y3272_ARATH^Q:489-1541,H:77-426^70.655%ID^E:2.56e-172^RecName: Full=Kelch repeat-containing protein At3g27220;^Eukaryota; Viridiplantae; Streptophyta; Embryophyta; Tracheophyta; Spermatophyta; Magnoliopsida; eudicotyledons; Gunneridae; Pentapetalae; rosids; malvids; Brassicales; Brassicaceae; Camelineae; Arabidopsis	1.34691	1.5721	0.0803331	0.348808	-0.0269916	-1.08807	-4.16531	-3.16531	-0.909814	0.986463	0.771088	-1.16531	0.0826129	0.394177	0.538451	2.54838	1.85149
1	Ntome_NODE_10796_length_2096_cov_158	.	-0.210216	0.52675	-1.79518	0.204821	-0.795179	-0.795179	-0.795179	-1.79518	-1.79518	2.20482	1.20482	0.789784	0.52675	-1.79518	-1.79518	3.3374	2.7765
1	Ntome_NODE_10799_length_2096_cov_74	EOT1_SOLLC^EOT1_SOLLC^Q:1346-375,H:26-350^59.475%ID^E:1.93e-91^RecName: Full=Protein EXPRESSION OF TERPENOIDS 1 {ECO:0000303|PubMed:24142382};^Eukaryota; Viridiplantae; Streptophyta; Embryophyta; Tracheophyta; Spermatophyta; Magnoliopsida; eudicotyledons; Gunneridae; Pentapetalae; asterids; lamiids; Solanales; Solanaceae; Solanoideae; Solaneae; Solanum; Lycopersicon	1.78475	1.631	0.20838	0.23592	0.597346	0.188305	-4.57298	-3.56578	-4.57298	1.39465	1.42634	1.22688	1.52358	0.730435	0.610903	0.918873	0.234375
1	Ntome_NODE_108_length_8380_cov_158	DPH7_DICDI^DPH7_DICDI^Q:1665-658,H:10-367^31.283%ID^E:7.04e-45^RecName: Full=Diphthine methyltransferase homolog;^Eukaryota; Amoebozoa; Mycetozoa; Dictyostelids; Dictyosteliales; Dictyosteliaceae; Dictyostelium	0.900968	0.763056	-0.0674584	-0.442874	-0.333906	0.0482847	-3.80399	-3.51289	-3.51549	1.04112	0.373334	0.591656	1.40276	1.16814	1.13122	1.83987	2.4162
1	Ntome_NODE_1080_length_4985_cov_172	C7A12_MEDTR^C7A12_MEDTR^Q:4888-3557,H:35-477^55.011%ID^E:4.8e-165^RecName: Full=Beta-amyrin 28-monooxygenase {ECO:0000305};^Eukaryota; Viridiplantae; Streptophyta; Embryophyta; Tracheophyta; Spermatophyta; Magnoliopsida; eudicotyledons; Gunneridae; Pentapetalae; rosids; fabids; Fabales; Fabaceae; Papilionoideae; 50 kb inversion clade; NPAAA clade; Hologalegina; IRL clade; Trifolieae; Medicago	0.827086	0.770776	-0.141982	-0.439134	-1.03269	-0.670305	-1.92625	-0.736847	-1.96161	0.574155	0.219562	-0.01633	0.801703	0.261374	0.75579	0.81277	1.90194
1	Ntome_NODE_10800_length_2095_cov_289	SCAB1_ARATH^SCAB1_ARATH^Q:1800-325,H:1-493^75.659%ID^E:0^RecName: Full=Stomatal closure-related actin-binding protein 1 {ECO:0000303|PubMed:21719691};^Eukaryota; Viridiplantae; Streptophyta; Embryophyta; Tracheophyta; Spermatophyta; Magnoliopsida; eudicotyledons; Gunneridae; Pentapetalae; rosids; malvids; Brassicales; Brassicaceae; Camelineae; Arabidopsis	0.803431	0.721231	-0.124272	0.97096	0.700331	0.597089	-4.45552	-3.88645	-6.2407	1.21499	1.30626	0.869099	1.56348	1.38299	1.18544	1.65715	1.73448
1	Ntome_NODE_10801_length_2095_cov_281	PCP_PONAB^PCP_PONAB^Q:209-1585,H:40-490^46.253%ID^E:2.13e-142^RecName: Full=Lysosomal Pro-X carboxypeptidase;^Eukaryota; Metazoa; Chordata; Craniata; Vertebrata; Euteleostomi; Mammalia; Eutheria; Euarchontoglires; Primates; Haplorrhini; Catarrhini; Hominidae; Pongo	2.8168	2.76957	1.01485	1.15777	0.630524	1.57404	-6.39428	-6.39428	-6.39428	0.422573	0.296972	0.352433	0.931607	0.378131	0.441641	2.54823	3.8477
1	Ntome_NODE_10802_length_2095_cov_255	PBL26_ARATH^PBL26_ARATH^Q:1796-1128,H:104-301^64.126%ID^E:1.76e-113^RecName: Full=Probable serine/threonine-protein kinase PBL26 {ECO:0000305};^Eukaryota; Viridiplantae; Streptophyta; Embryophyta; Tracheophyta; Spermatophyta; Magnoliopsida; eudicotyledons; Gunneridae; Pentapetalae; rosids; malvids; Brassicales; Brassicaceae; Camelineae; Arabidopsis`PBL26_ARATH^PBL26_ARATH^Q:1044-790,H:298-383^52.…	1.36181	1.44324	0.141069	-0.0653822	-0.595897	-0.443894	-1.76582	-3.76582	-3.76582	1.09216	-0.180859	-0.595897	0.878034	1.14107	0.989066	2.09141	2.04153
1	Ntome_NODE_10803_length_2095_cov_245	PPR3_ARATH^PPR3_ARATH^Q:213-1694,H:39-524^60.931%ID^E:0^RecName: Full=Pentatricopeptide repeat-containing protein At1g02150;^Eukaryota; Viridiplantae; Streptophyta; Embryophyta; Tracheophyta; Spermatophyta; Magnoliopsida; eudicotyledons; Gunneridae; Pentapetalae; rosids; malvids; Brassicales; Brassicaceae; Camelineae; Arabidopsis	1.24325	0.923239	-0.620408	0.638634	0.186737	0.490589	-5.91319	-5.91319	-5.91319	1.4044	1.66243	1.45523	2.25448	1.31573	0.594763	2.38602	3.80449
1	Ntome_NODE_10804_length_2095_cov_224	IDD10_ARATH^IDD10_ARATH^Q:1589-870,H:2-278^66.065%ID^E:9.66e-102^RecName: Full=Zinc finger protein JACKDAW {ECO:0000303|PubMed:17785527};^Eukaryota; Viridiplantae; Streptophyta; Embryophyta; Tracheophyta; Spermatophyta; Magnoliopsida; eudicotyledons; Gunneridae; Pentapetalae; rosids; malvids; Brassicales; Brassicaceae; Camelineae; Arabidopsis	1.31866	1.05009	0.673116	0.382518	0.0351404	1.04428	-4.78861	-4.78861	-3.78861	0.46991	0.253598	1.07086	1.80085	0.576314	0.998249	1.51517	2.17706
1	Ntome_NODE_10805_length_2095_cov_222	MTBC1_VITVI^MTBC1_VITVI^Q:263-1822,H:5-517^80%ID^E:0^RecName: Full=Probable bifunctional methylthioribulose-1-phosphate dehydratase/enolase-phosphatase E1 1 {ECO:0000255|HAMAP-Rule:MF_03118};^Eukaryota; Viridiplantae; Streptophyta; Embryophyta; Tracheophyta; Spermatophyta; Magnoliopsida; eudicotyledons; Gunneridae; Pentapetalae; rosids; Vitales; Vitaceae; Viteae; Vitis	2.04759	2.13487	0.871187	-0.0442582	-0.568485	-0.0837274	-5.86419	-5.41249	-6.89276	1.28491	1.78672	1.077	1.74499	1.61067	0.976807	2.04662	3.28453
1	Ntome_NODE_10806_length_2095_cov_218	Y1457_ARATH^Y1457_ARATH^Q:587-1498,H:66-370^65.902%ID^E:1.96e-123^RecName: Full=Acyltransferase-like protein At1g54570, chloroplastic;^Eukaryota; Viridiplantae; Streptophyta; Embryophyta; Tracheophyta; Spermatophyta; Magnoliopsida; eudicotyledons; Gunneridae; Pentapetalae; rosids; malvids; Brassicales; Brassicaceae; Camelineae; Arabidopsis	1.37715	0.71387	1.37558	-0.312234	-0.373658	0.0838539	-5.0164	-6.07299	-6.07299	1.44508	1.80144	1.64009	2.55206	1.28183	2.00975	1.80267	1.76489
1	Ntome_NODE_10807_length_2095_cov_218	.	1.29277	0.976444	1.35515	0.585189	-0.0448132	0.730896	-7.36376	-4.7716	-6.36376	1.36902	1.1142	1.21687	2.11029	1.17349	0.981199	3.03177	2.60666
1	Ntome_NODE_10808_length_2095_cov_56	RNP1_ARATH^RNP1_ARATH^Q:112-657,H:6-192^53.476%ID^E:9.15e-65^RecName: Full=Heterogeneous nuclear ribonucleoprotein 1;^Eukaryota; Viridiplantae; Streptophyta; Embryophyta; Tracheophyta; Spermatophyta; Magnoliopsida; eudicotyledons; Gunneridae; Pentapetalae; rosids; malvids; Brassicales; Brassicaceae; Camelineae; Arabidopsis	0.725276	0.451859	-1.20609	-0.579251	-0.603033	-0.0696003	-2.49156	-5.03999	-5.03999	1.73861	1.62278	1.61865	2.15082	1.81649	1.92163	1.28193	1.70147
1	Ntome_NODE_10809_length_2094_cov_287	CAX2_ORYSJ^CAX2_ORYSJ^Q:240-1496,H:22-434^75%ID^E:0^RecName: Full=Vacuolar cation/proton exchanger 2;^Eukaryota; Viridiplantae; Streptophyta; Embryophyta; Tracheophyta; Spermatophyta; Magnoliopsida; Liliopsida; Poales; Poaceae; BOP clade; Oryzoideae; Oryzeae; Oryzinae; Oryza; Oryza sativa	1.21086	1.2488	-0.638891	0.384875	0.598896	0.283695	-3.35863	-5.17558	-4.12915	0.835017	0.916037	0.0869945	1.14862	0.554117	0.837211	2.3539	2.84323
1	Ntome_NODE_1081_length_4983_cov_255	SCP48_ARATH^SCP48_ARATH^Q:915-2306,H:35-501^69.593%ID^E:0^RecName: Full=Serine carboxypeptidase-like 48;^Eukaryota; Viridiplantae; Streptophyta; Embryophyta; Tracheophyta; Spermatophyta; Magnoliopsida; eudicotyledons; Gunneridae; Pentapetalae; rosids; malvids; Brassicales; Brassicaceae; Camelineae; Arabidopsis	1.5766	1.48635	0.134128	0.862715	0.621851	0.911149	-5.39067	-5.4809	-6.82264	1.58358	1.25504	1.10191	1.26796	0.779294	0.398892	3.0625	2.65224
1	Ntome_NODE_10810_length_2094_cov_279	CYSG_ACIAD^CYSG_ACIAD^Q:1249-539,H:216-450^54.583%ID^E:3.92e-72^RecName: Full=Siroheme synthase {ECO:0000255|HAMAP-Rule:MF_01646};^Bacteria; Proteobacteria; Gammaproteobacteria; Pseudomonadales; Moraxellaceae; Acinetobacter	0.879662	0.975043	-1.12034	1.07549	0.553687	0.477766	-5.27819	-5.27819	-4.12115	1.84924	0.976933	1.14354	1.87926	1.06166	0.192672	2.45652	2.2764
1	Ntome_NODE_10811_length_2094_cov_264	STY13_ARATH^STY13_ARATH^Q:567-1742,H:24-411^80.203%ID^E:0^RecName: Full=Serine/threonine-protein kinase STY13 {ECO:0000305};^Eukaryota; Viridiplantae; Streptophyta; Embryophyta; Tracheophyta; Spermatophyta; Magnoliopsida; eudicotyledons; Gunneridae; Pentapetalae; rosids; malvids; Brassicales; Brassicaceae; Camelineae; Arabidopsis	2.06391	1.98183	0.131833	0.827678	0.413636	0.0137911	-6.24611	-5.19529	-6.24038	1.36119	1.09951	0.94737	1.31589	1.37205	1.39846	2.65026	2.10436
1	Ntome_NODE_10812_length_2094_cov_255	IX10L_ARATH^IX10L_ARATH^Q:1639-413,H:8-415^91.687%ID^E:0^RecName: Full=Probable beta-1,4-xylosyltransferase IRX10L;^Eukaryota; Viridiplantae; Streptophyta; Embryophyta; Tracheophyta; Spermatophyta; Magnoliopsida; eudicotyledons; Gunneridae; Pentapetalae; rosids; malvids; Brassicales; Brassicaceae; Camelineae; Arabidopsis	1.38085	1.32518	0.326344	0.296123	0.843386	1.12438	-7.21444	-7.21444	-7.21444	2.31895	1.99737	1.99155	2.20478	2.09774	1.63061	1.89643	2.20964
1	Ntome_NODE_10813_length_2094_cov_238	.	2.09108	1.22073	0.503652	-0.988895	-0.70793	-0.112156	-4.78175	-3.75318	-4.78175	1.11573	0.53077	0.547015	1.30529	1.39397	1.17175	2.31586	2.92981
1	Ntome_NODE_10814_length_2094_cov_221	CRLK2_ARATH^CRLK2_ARATH^Q:1826-573,H:1-425^63.7%ID^E:1.17e-179^RecName: Full=Calcium/calmodulin-regulated receptor-like kinase 2 {ECO:0000303|PubMed:21056039};^Eukaryota; Viridiplantae; Streptophyta; Embryophyta; Tracheophyta; Spermatophyta; Magnoliopsida; eudicotyledons; Gunneridae; Pentapetalae; rosids; malvids; Brassicales; Brassicaceae; Camelineae; Arabidopsis	1.09204	1.52762	-0.26615	0.414465	-0.50148	0.655617	-2.99073	-5.52429	-5.52429	1.13106	0.439645	0.521413	1.37706	0.866307	1.18017	2.58204	3.01951
1	Ntome_NODE_10816_length_2094_cov_170	NLE1_ARATH^NLE1_ARATH^Q:134-1525,H:11-473^81.25%ID^E:0^RecName: Full=Notchless protein homolog {ECO:0000303|PubMed:23572950};^Eukaryota; Viridiplantae; Streptophyta; Embryophyta; Tracheophyta; Spermatophyta; Magnoliopsida; eudicotyledons; Gunneridae; Pentapetalae; rosids; malvids; Brassicales; Brassicaceae; Camelineae; Arabidopsis	1.76903	1.41106	0.0922676	1.31089	0.201161	0.585402	-4.91985	-4.91985	-4.91985	0.575841	1.25527	0.241631	0.852823	1.21128	-0.0693547	2.10251	3.21975
1	Ntome_NODE_10817_length_2094_cov_138	Y2474_ARATH^Y2474_ARATH^Q:186-1838,H:26-568^72.958%ID^E:0^RecName: Full=BTB/POZ domain-containing protein At2g04740;^Eukaryota; Viridiplantae; Streptophyta; Embryophyta; Tracheophyta; Spermatophyta; Magnoliopsida; eudicotyledons; Gunneridae; Pentapetalae; rosids; malvids; Brassicales; Brassicaceae; Camelineae; Arabidopsis	1.67456	1.5884	0.243595	0.117437	-0.244131	0.693348	-4.72956	-3.14941	-2.55005	0.776651	0.370159	-0.318809	0.63186	0.836344	0.198339	0.998363	2.8629
1	Ntome_NODE_10818_length_2094_cov_133	EXOS3_DICDI^EXOS3_DICDI^Q:1122-709,H:80-216^45.652%ID^E:6.4e-30^RecName: Full=Putative exosome complex component rrp40;^Eukaryota; Amoebozoa; Mycetozoa; Dictyostelids; Dictyosteliales; Dictyosteliaceae; Dictyostelium	1.71864	1.91865	-0.402278	0.163168	0.173306	0.424639	-6.01315	-6.01315	-6.01315	1.55761	1.78094	1.05573	1.64713	1.16964	1.52864	2.448	2.85567
1	Ntome_NODE_10819_length_2093_cov_306	CKL2_ARATH^CKL2_ARATH^Q:275-1666,H:1-465^76.231%ID^E:0^RecName: Full=Casein kinase 1-like protein 2 {ECO:0000305};^Eukaryota; Viridiplantae; Streptophyta; Embryophyta; Tracheophyta; Spermatophyta; Magnoliopsida; eudicotyledons; Gunneridae; Pentapetalae; rosids; malvids; Brassicales; Brassicaceae; Camelineae; Arabidopsis	1.30289	1.15114	-0.337776	0.319791	-0.086586	0.244926	-3.23197	-3.50682	-4.47389	0.711243	0.705068	0.499931	1.09886	0.852727	0.864862	1.85833	2.02729
1	Ntome_NODE_1082_length_4976_cov_95	HEN4_ARATH^HEN4_ARATH^Q:4636-4088,H:434-614^36.17%ID^E:3.86e-23^RecName: Full=KH domain-containing protein HEN4 {ECO:0000305};^Eukaryota; Viridiplantae; Streptophyta; Embryophyta; Tracheophyta; Spermatophyta; Magnoliopsida; eudicotyledons; Gunneridae; Pentapetalae; rosids; malvids; Brassicales; Brassicaceae; Camelineae; Arabidopsis`HEN4_ARATH^HEN4_ARATH^Q:3795-3403,H:480-614^37.037%ID^E:1.38e-15^…	1.20716	1.01348	0.297346	-0.397468	0.00403381	0.190038	-3.47236	-3.45636	-3.28644	0.613312	0.639707	0.274225	1.0847	0.499658	0.42232	2.0677	2.29895
1	Ntome_NODE_10820_length_2093_cov_289	CRPK1_ARATH^CRPK1_ARATH^Q:419-1435,H:11-351^70.381%ID^E:2.99e-180^RecName: Full=Cold-responsive protein kinase 1 {ECO:0000303|PubMed:28344081};^Eukaryota; Viridiplantae; Streptophyta; Embryophyta; Tracheophyta; Spermatophyta; Magnoliopsida; eudicotyledons; Gunneridae; Pentapetalae; rosids; malvids; Brassicales; Brassicaceae; Camelineae; Arabidopsis	1.86032	1.63214	1.01483	-0.224755	-0.543627	0.282422	-3.36448	-4.30392	-3.20402	0.626592	0.23123	0.392271	1.04072	0.351039	0.650277	1.71836	1.84057
1	Ntome_NODE_10821_length_2093_cov_286	DTX21_ARATH^DTX21_ARATH^Q:243-1682,H:7-488^67.22%ID^E:0^RecName: Full=Protein DETOXIFICATION 21 {ECO:0000303|PubMed:11739388};^Eukaryota; Viridiplantae; Streptophyta; Embryophyta; Tracheophyta; Spermatophyta; Magnoliopsida; eudicotyledons; Gunneridae; Pentapetalae; rosids; malvids; Brassicales; Brassicaceae; Camelineae; Arabidopsis	1.15212	0.645154	-0.542665	-0.487052	-1.45421	-1.08229	-2.30113	-1.79238	-3.33915	0.232182	0.447914	0.667049	1.60143	1.51088	1.37229	1.36673	2.00314
1	Ntome_NODE_10822_length_2093_cov_207	.	0.656243	0.434721	0.126523	-0.206838	-0.225306	-0.245213	-3.96306	-1.9335	-1.36762	0.321185	0.578811	-0.0123586	1.20053	0.761709	0.251987	1.44633	2.17585
1	Ntome_NODE_10823_length_2093_cov_195	ROGF8_ARATH^ROGF8_ARATH^Q:2-769,H:291-522^59.69%ID^E:4.65e-83^RecName: Full=Rho guanine nucleotide exchange factor 8 {ECO:0000303|PubMed:15980860};^Eukaryota; Viridiplantae; Streptophyta; Embryophyta; Tracheophyta; Spermatophyta; Magnoliopsida; eudicotyledons; Gunneridae; Pentapetalae; rosids; malvids; Brassicales; Brassicaceae; Camelineae; Arabidopsis	1.79297	1.8176	0.722901	0.831989	0.783182	1.23138	-7.30285	-6.29565	-5.6475	1.19736	0.826384	0.781642	1.792	1.12119	0.418183	2.41823	3.51099
1	Ntome_NODE_10824_length_2093_cov_134	ALFP2_ARATH^ALFP2_ARATH^Q:1800-916,H:11-306^86.622%ID^E:0^RecName: Full=Fructose-bisphosphate aldolase 2, chloroplastic {ECO:0000305};^Eukaryota; Viridiplantae; Streptophyta; Embryophyta; Tracheophyta; Spermatophyta; Magnoliopsida; eudicotyledons; Gunneridae; Pentapetalae; rosids; malvids; Brassicales; Brassicaceae; Camelineae; Arabidopsis	1.90128	1.45267	0.306536	0.641333	-1.01539	-0.873959	-3.31584	-3.33732	-4.33732	0.950669	0.482859	1.4511	-0.0153921	-1.52997	-0.752358	3.28999	4.70111
1	Ntome_NODE_10826_length_2093_cov_62	RNLX_SOLLC^RNLX_SOLLC^Q:145-405,H:1-88^89.773%ID^E:1.95e-39^RecName: Full=Intracellular ribonuclease LX;^Eukaryota; Viridiplantae; Streptophyta; Embryophyta; Tracheophyta; Spermatophyta; Magnoliopsida; eudicotyledons; Gunneridae; Pentapetalae; asterids; lamiids; Solanales; Solanaceae; Solanoideae; Solaneae; Solanum; Lycopersicon	1.10195	1.20149	-0.384435	0.464525	0.879562	0.567618	-4.29036	-3.29036	-3.29036	-0.138991	-0.2029	-0.383472	0.879562	0.101954	0.754031	2.72064	3.30955
1	Ntome_NODE_10829_length_2092_cov_280	TMN3_ARATH^TMN3_ARATH^Q:2091-463,H:51-592^67.772%ID^E:0^RecName: Full=Transmembrane 9 superfamily member 3 {ECO:0000305};^Eukaryota; Viridiplantae; Streptophyta; Embryophyta; Tracheophyta; Spermatophyta; Magnoliopsida; eudicotyledons; Gunneridae; Pentapetalae; rosids; malvids; Brassicales; Brassicaceae; Camelineae; Arabidopsis	0.926203	0.892004	-0.110398	1.00193	0.408137	1.09124	-3.62497	-5.28032	-5.28032	0.236322	0.534484	0.146277	1.51786	0.951378	1.29665	2.63023	2.66331
1	Ntome_NODE_1083_length_4976_cov_69	POL_MLVCB^POL_MLVCB^Q:1428-1084,H:1484-1598^34.483%ID^E:5.51e-17^RecName: Full=Gag-Pol polyprotein;^Viruses; Ortervirales; Retroviridae; Orthoretrovirinae; Gammaretrovirus; Murine leukemia virus`POL_MLVCB^POL_MLVCB^Q:1768-1421,H:1381-1486^31.034%ID^E:5.51e-17^RecName: Full=Gag-Pol polyprotein;^Viruses; Ortervirales; Retroviridae; Orthoretrovirinae; Gammaretrovirus; Murine leukemia virus	1.9932	2.30771	1.32251	0.795263	1.13406	2.11719	-4.2922	-4.2922	-3.2922	-0.541594	-0.122275	-1.2922	0.40824	-0.122275	0.100117	1.23887	2.53778
1	Ntome_NODE_10830_length_2092_cov_266	ARAE1_ARATH^ARAE1_ARATH^Q:533-1750,H:1-409^84.352%ID^E:0^RecName: Full=UDP-arabinose 4-epimerase 1;^Eukaryota; Viridiplantae; Streptophyta; Embryophyta; Tracheophyta; Spermatophyta; Magnoliopsida; eudicotyledons; Gunneridae; Pentapetalae; rosids; malvids; Brassicales; Brassicaceae; Camelineae; Arabidopsis	1.98372	1.75117	0.544741	0.544521	0.150808	0.614113	-7.06923	-5.45099	-6.01265	2.03159	1.60824	1.51671	1.63429	1.13485	1.12798	1.45766	2.43249
1	Ntome_NODE_10831_length_2092_cov_213	FLA8_ARATH^FLA8_ARATH^Q:1862-879,H:8-335^71.646%ID^E:1.49e-148^RecName: Full=Fasciclin-like arabinogalactan protein 8;^Eukaryota; Viridiplantae; Streptophyta; Embryophyta; Tracheophyta; Spermatophyta; Magnoliopsida; eudicotyledons; Gunneridae; Pentapetalae; rosids; malvids; Brassicales; Brassicaceae; Camelineae; Arabidopsis	1.18738	0.963895	0.666084	1.60512	0.690179	1.39666	-3.68138	-2.66338	-2.81855	0.48172	-0.237062	-1.16093	0.550041	0.282794	-1.35682	0.837922	3.25632
1	Ntome_NODE_10832_length_2092_cov_157	.	2.72392	2.15911	1.60755	0.321429	-0.571549	0.103422	-3.55844	-2.51968	-2.45539	0.143789	0.490742	0.0413804	0.425661	-0.397826	-1.21168	1.20338	1.49419
1	Ntome_NODE_10835_length_2092_cov_30	.	1.69705	1.51762	1.21111	1.34702	0.0947705	1.66058	-6.56815	-4.9736	-6.56815	0.459648	0.931539	0.226009	1.66067	1.70205	0.239079	2.43123	2.93152
1	Ntome_NODE_10837_length_2091_cov_297	BPM2_ARATH^BPM2_ARATH^Q:1609-473,H:27-406^71.316%ID^E:0^RecName: Full=BTB/POZ and MATH domain-containing protein 2;^Eukaryota; Viridiplantae; Streptophyta; Embryophyta; Tracheophyta; Spermatophyta; Magnoliopsida; eudicotyledons; Gunneridae; Pentapetalae; rosids; malvids; Brassicales; Brassicaceae; Camelineae; Arabidopsis	1.954	1.83529	0.128635	0.553587	0.148662	0.534415	-5.57731	-4.38407	-4.77871	1.14359	0.885379	0.608457	1.45087	1.18643	0.676483	1.31621	2.31808
1	Ntome_NODE_10838_length_2091_cov_290	RAP24_ARATH^RAP24_ARATH^Q:645-1709,H:1-333^45.361%ID^E:1.75e-60^RecName: Full=Ethylene-responsive transcription factor RAP2-4;^Eukaryota; Viridiplantae; Streptophyta; Embryophyta; Tracheophyta; Spermatophyta; Magnoliopsida; eudicotyledons; Gunneridae; Pentapetalae; rosids; malvids; Brassicales; Brassicaceae; Camelineae; Arabidopsis	1.44026	1.03648	1.97924	0.131361	0.404053	1.47759	-5.83512	-5.83512	-4.83512	0.486812	1.00962	0.327376	1.30515	1.84394	1.04936	1.57351	2.44059
1	Ntome_NODE_10839_length_2091_cov_267	CINV2_ARATH^CINV2_ARATH^Q:1908-268,H:11-558^85.792%ID^E:0^RecName: Full=Alkaline/neutral invertase CINV2 {ECO:0000305};^Eukaryota; Viridiplantae; Streptophyta; Embryophyta; Tracheophyta; Spermatophyta; Magnoliopsida; eudicotyledons; Gunneridae; Pentapetalae; rosids; malvids; Brassicales; Brassicaceae; Camelineae; Arabidopsis	2.35443	1.90243	1.01499	1.11032	0.461991	0.826251	-6.52681	-6.52681	-6.52681	1.42663	1.47573	0.979083	1.88864	1.35265	0.781987	1.65086	2.35443
1	Ntome_NODE_1084_length_4975_cov_213	PHL_ARATH^PHL_ARATH^Q:4733-1914,H:1-913^48.634%ID^E:0^RecName: Full=Protein PHYTOCHROME-DEPENDENT LATE-FLOWERING {ECO:0000303|PubMed:24127609};^Eukaryota; Viridiplantae; Streptophyta; Embryophyta; Tracheophyta; Spermatophyta; Magnoliopsida; eudicotyledons; Gunneridae; Pentapetalae; rosids; malvids; Brassicales; Brassicaceae; Camelineae; Arabidopsis`PHL_ARATH^PHL_ARATH^Q:1472-1110,H:1043-1159^59.3…	1.88785	1.66845	0.166067	-0.155861	0.022959	0.246218	-4.84298	-3.09517	-4.97099	1.02692	0.72171	0.641496	1.02039	0.941018	0.441493	1.88887	2.39155
1	Ntome_NODE_10840_length_2091_cov_258	SYNO_ARATH^SYNO_ARATH^Q:1930-215,H:1-567^74.216%ID^E:0^RecName: Full=Asparagine--tRNA ligase, chloroplastic/mitochondrial {ECO:0000305};^Eukaryota; Viridiplantae; Streptophyta; Embryophyta; Tracheophyta; Spermatophyta; Magnoliopsida; eudicotyledons; Gunneridae; Pentapetalae; rosids; malvids; Brassicales; Brassicaceae; Camelineae; Arabidopsis	1.18443	1.04411	-0.618278	0.592217	-0.225565	0.0551104	-3.0071	-2.72246	-3.25009	0.342947	0.79082	-0.0426663	1.03639	0.204327	0.343238	1.87181	2.40077
1	Ntome_NODE_10841_length_2091_cov_193	TCPG_ARATH^TCPG_ARATH^Q:133-1803,H:1-555^87.612%ID^E:0^RecName: Full=T-complex protein 1 subunit gamma {ECO:0000303|PubMed:11599560};^Eukaryota; Viridiplantae; Streptophyta; Embryophyta; Tracheophyta; Spermatophyta; Magnoliopsida; eudicotyledons; Gunneridae; Pentapetalae; rosids; malvids; Brassicales; Brassicaceae; Camelineae; Arabidopsis	2.89672	2.55092	1.36166	0.890077	0.138747	0.754836	-6.09679	-6.09679	-6.09679	0.581002	0.9679	-0.202941	0.961095	1.59809	0.517627	2.06308	3.21155
1	Ntome_NODE_10842_length_2091_cov_178	.	1.62862	1.29606	0.430812	0.530106	-0.659949	0.855536	-2.67405	-2.67405	-5.02172	0.402196	0.667022	0.189294	0.89929	0.636494	-1.17372	1.60764	3.06043
1	Ntome_NODE_10843_length_2091_cov_166	UXS2_ARATH^UXS2_ARATH^Q:156-1154,H:1-336^78.363%ID^E:0^RecName: Full=UDP-glucuronic acid decarboxylase 2;^Eukaryota; Viridiplantae; Streptophyta; Embryophyta; Tracheophyta; Spermatophyta; Magnoliopsida; eudicotyledons; Gunneridae; Pentapetalae; rosids; malvids; Brassicales; Brassicaceae; Camelineae; Arabidopsis	1.56657	2.34947	-0.0906433	1.23848	1.90888	1.33045	-8.36318	-5.06159	-6.05867	1.67752	1.29699	1.09095	-0.491275	1.12583	0.740895	3.07837	2.66096
1	Ntome_NODE_10844_length_2091_cov_159	C1D_XENLA^C1D_XENLA^Q:365-577,H:65-130^39.437%ID^E:5.11e-07^RecName: Full=Nuclear nucleic acid-binding protein C1D;^Eukaryota; Metazoa; Chordata; Craniata; Vertebrata; Euteleostomi; Amphibia; Batrachia; Anura; Pipoidea; Pipidae; Xenopodinae; Xenopus; Xenopus	2.10021	1.67189	-0.175838	0.827957	0.152602	0.694928	-5.18796	-5.18796	-5.18796	0.634515	1.2803	0.625821	1.19661	0.888642	0.89738	2.31991	2.44895
1	Ntome_NODE_10845_length_2091_cov_129	IKU1_ARATH^IKU1_ARATH^Q:1378-842,H:1-178^51.596%ID^E:1.98e-24^RecName: Full=Protein HAIKU1 {ECO:0000305};^Eukaryota; Viridiplantae; Streptophyta; Embryophyta; Tracheophyta; Spermatophyta; Magnoliopsida; eudicotyledons; Gunneridae; Pentapetalae; rosids; malvids; Brassicales; Brassicaceae; Camelineae; Arabidopsis`IKU1_ARATH^IKU1_ARATH^Q:598-437,H:341-401^65.574%ID^E:1.12e-06^RecName: Full=Protein H…	1.49194	2.119	0.43274	1.16817	0.836916	0.188055	-5.05911	-5.05911	-5.05911	2.1961	0.14995	-0.294109	0.859988	0.625706	1.84405	1.7353	1.82353
1	Ntome_NODE_10846_length_2091_cov_118	DIT1_SPIOL^DIT1_SPIOL^Q:1367-1747,H:443-569^87.402%ID^E:2.1e-65^RecName: Full=Dicarboxylate transporter 1, chloroplastic;^Eukaryota; Viridiplantae; Streptophyta; Embryophyta; Tracheophyta; Spermatophyta; Magnoliopsida; eudicotyledons; Gunneridae; Pentapetalae; Caryophyllales; Chenopodiaceae; Chenopodioideae; Anserineae; Spinacia	1.13399	1.12052	-0.301349	0.768018	0.451591	-0.18684	-4.54337	-5.58601	-5.58601	1.67712	1.19587	1.0259	1.80691	0.879637	0.501452	2.5929	3.04967
1	Ntome_NODE_10847_length_2091_cov_104	.	-0.638427	0.776611	-2.22339	-3.80835	-2.22339	1.71521	-3.80835	-3.80835	-3.80835	1.80636	1.71521	1.77661	2.94654	2.4011	2.42047	1.999	2.7615
1	Ntome_NODE_10848_length_2091_cov_67	.	0.632212	0.772902	0.412363	0.0285538	0.412363	-0.325083	-2.38732	-1.62909	-2.8862	0.0146877	0.354991	-1.03558	0.798509	-0.0815495	0.508144	2.16363	2.24646
1	Ntome_NODE_10849_length_2091_cov_66	.	0.800168	0.33698	-0.443393	-0.144438	-0.0153792	-0.119028	-1.19628	-1.66719	-1.37483	-0.180429	-0.0604572	0.0461125	1.13045	0.192113	1.03363	0.813601	0.848367
1	Ntome_NODE_10852_length_2090_cov_295	PLP6_ARATH^PLP6_ARATH^Q:454-1833,H:39-492^65.539%ID^E:0^RecName: Full=Patatin-like protein 6;^Eukaryota; Viridiplantae; Streptophyta; Embryophyta; Tracheophyta; Spermatophyta; Magnoliopsida; eudicotyledons; Gunneridae; Pentapetalae; rosids; malvids; Brassicales; Brassicaceae; Camelineae; Arabidopsis	-0.0599033	0.391213	-0.161328	-0.0387095	1.12978	1.0466	-6.38183	-7.18092	-6.34096	1.33667	1.64684	1.39923	3.01305	2.58037	2.21817	3.07882	2.32291
1	Ntome_NODE_10853_length_2090_cov_286	ACOT9_HUMAN^ACOT9_HUMAN^Q:682-1635,H:86-400^34.154%ID^E:1.06e-29^RecName: Full=Acyl-coenzyme A thioesterase 9, mitochondrial;^Eukaryota; Metazoa; Chordata; Craniata; Vertebrata; Euteleostomi; Mammalia; Eutheria; Euarchontoglires; Primates; Haplorrhini; Catarrhini; Hominidae; Homo	2.43606	2.26265	0.452642	0.978677	0.365145	0.0798489	-5.4721	-6.01034	-7.45395	1.45972	1.4698	1.01671	1.46626	1.70072	1.32915	1.68035	2.23867
1	Ntome_NODE_10855_length_2090_cov_99	.	1.19648	1.37759	-0.0306864	-0.703964	-0.0339508	-0.465322	-3.07005	-2.61417	-4.58602	0.946608	1.35372	0.434742	0.692579	1.36964	0.977295	1.54227	1.61323
1	Ntome_NODE_10856_length_2090_cov_48	THIM_ARATH^THIM_ARATH^Q:1979-1176,H:9-275^62.687%ID^E:4.29e-108^RecName: Full=Hydroxyethylthiazole kinase;^Eukaryota; Viridiplantae; Streptophyta; Embryophyta; Tracheophyta; Spermatophyta; Magnoliopsida; eudicotyledons; Gunneridae; Pentapetalae; rosids; malvids; Brassicales; Brassicaceae; Camelineae; Arabidopsis	1.5045	1.44264	-0.387586	0.620462	-0.225684	0.409445	-3.92612	-3.92612	-3.92612	0.720615	1.02154	0.790867	0.747433	0.448916	0.718886	1.46619	2.50014
1	Ntome_NODE_10857_length_2090_cov_33	SINE1_ARATH^SINE1_ARATH^Q:147-1559,H:1-472^61.954%ID^E:0^RecName: Full=Protein SINE1 {ECO:0000303|PubMed:24891605};^Eukaryota; Viridiplantae; Streptophyta; Embryophyta; Tracheophyta; Spermatophyta; Magnoliopsida; eudicotyledons; Gunneridae; Pentapetalae; rosids; malvids; Brassicales; Brassicaceae; Camelineae; Arabidopsis	0.785379	0.867681	0.2914	-0.105896	-0.199718	0.353341	-3.86078	-3.86078	-3.86078	1.3235	-0.163677	-0.361257	2.11604	1.09806	0.481913	2.78105	2.31454
1	Ntome_NODE_10858_length_2089_cov_295	NOP12_CANAL^NOP12_CANAL^Q:1241-456,H:160-417^35.036%ID^E:3.85e-35^RecName: Full=Nucleolar protein 12;^Eukaryota; Fungi; Dikarya; Ascomycota; Saccharomycotina; Saccharomycetes; Saccharomycetales; Debaryomycetaceae; Candida/Lodderomyces clade; Candida	2.19752	2.00514	2.00617	0.596002	0.0570452	0.927904	-5.49234	-5.38299	-7.83717	1.28711	0.929992	0.987888	1.54124	0.876598	0.732575	2.26158	2.30573
1	Ntome_NODE_10859_length_2089_cov_251	APF2_ARATH^APF2_ARATH^Q:620-1960,H:72-485^35.857%ID^E:2.08e-64^RecName: Full=Aspartyl protease family protein 2 {ECO:0000305};^Eukaryota; Viridiplantae; Streptophyta; Embryophyta; Tracheophyta; Spermatophyta; Magnoliopsida; eudicotyledons; Gunneridae; Pentapetalae; rosids; malvids; Brassicales; Brassicaceae; Camelineae; Arabidopsis	0.443315	1.55403	1.19929	0.656309	0.481646	0.754679	-4.85953	-4.08192	-5.66688	1.82401	0.0591327	-1.41592	1.04296	1.84361	2.19811	2.1911	1.77606
1	Ntome_NODE_1086_length_4974_cov_101	AEE19_ARATH^AEE19_ARATH^Q:163-2346,H:2-720^46.348%ID^E:0^RecName: Full=Putative acyl-activating enzyme 19;^Eukaryota; Viridiplantae; Streptophyta; Embryophyta; Tracheophyta; Spermatophyta; Magnoliopsida; eudicotyledons; Gunneridae; Pentapetalae; rosids; malvids; Brassicales; Brassicaceae; Camelineae; Arabidopsis	0.595584	0.199201	-1.0575	0.513939	0.0614556	0.802437	-3.56937	-0.249325	-2.73871	0.177312	0.131791	-0.471168	1.16624	1.04159	1.28536	0.64528	1.46588
1	Ntome_NODE_10860_length_2089_cov_219	DCAF8_MOUSE^DCAF8_MOUSE^Q:215-1396,H:153-527^41.103%ID^E:1.02e-90^RecName: Full=DDB1- and CUL4-associated factor 8;^Eukaryota; Metazoa; Chordata; Craniata; Vertebrata; Euteleostomi; Mammalia; Eutheria; Euarchontoglires; Glires; Rodentia; Myomorpha; Muroidea; Muridae; Murinae; Mus; Mus	2.24047	2.06053	0.654411	0.36885	0.178319	0.316703	-2.85498	-1.42293	-3.00523	0.223551	0.509827	-0.876765	-0.311198	-0.0505133	-0.312434	0.752384	1.52901
1	Ntome_NODE_10861_length_2089_cov_191	BB_ARATH^BB_ARATH^Q:1055-1756,H:10-241^46.025%ID^E:5.44e-56^RecName: Full=E3 ubiquitin-protein ligase BIG BROTHER;^Eukaryota; Viridiplantae; Streptophyta; Embryophyta; Tracheophyta; Spermatophyta; Magnoliopsida; eudicotyledons; Gunneridae; Pentapetalae; rosids; malvids; Brassicales; Brassicaceae; Camelineae; Arabidopsis	-0.117126	0.308801	-0.491439	1.07995	0.936922	0.727746	-4.03504	-3.76406	-3.20496	1.49414	1.1556	0.748725	0.461496	0.479572	-0.271737	2.24194	2.24946
1	Ntome_NODE_10862_length_2089_cov_186	DRIP2_ARATH^DRIP2_ARATH^Q:1788-520,H:4-416^55.22%ID^E:4.41e-150^RecName: Full=E3 ubiquitin protein ligase DRIP2;^Eukaryota; Viridiplantae; Streptophyta; Embryophyta; Tracheophyta; Spermatophyta; Magnoliopsida; eudicotyledons; Gunneridae; Pentapetalae; rosids; malvids; Brassicales; Brassicaceae; Camelineae; Arabidopsis	1.34113	0.997529	-0.0119464	-0.0957065	-0.305261	0.500496	-5.25759	-3.59311	-5.25759	1.37874	1.51165	0.230085	1.5904	1.16009	0.95517	2.14209	2.71383
1	Ntome_NODE_10863_length_2089_cov_173	NFD4_ARATH^NFD4_ARATH^Q:93-1796,H:37-569^57.719%ID^E:0^RecName: Full=Protein NUCLEAR FUSION DEFECTIVE 4 {ECO:0000303|PubMed:16698901};^Eukaryota; Viridiplantae; Streptophyta; Embryophyta; Tracheophyta; Spermatophyta; Magnoliopsida; eudicotyledons; Gunneridae; Pentapetalae; rosids; malvids; Brassicales; Brassicaceae; Camelineae; Arabidopsis	2.81232	2.58689	1.22735	0.816567	-0.133393	0.91497	-5.59282	-4.59282	-5.59282	-0.592824	0.407176	0.798118	1.3049	0.536871	-0.307422	2.49993	2.90702
1	Ntome_NODE_10864_length_2088_cov_53	GSTX3_SOYBN^GSTX3_SOYBN^Q:3-101,H:42-74^93.939%ID^E:3.9e-23^RecName: Full=Glutathione S-transferase 3;^Eukaryota; Viridiplantae; Streptophyta; Embryophyta; Tracheophyta; Spermatophyta; Magnoliopsida; eudicotyledons; Gunneridae; Pentapetalae; rosids; fabids; Fabales; Fabaceae; Papilionoideae; 50 kb inversion clade; NPAAA clade; indigoferoid/millettioid clade; Phaseoleae; Glycine; Soja`GSTX3_SOYBN^…	1.25207	1.45078	0.734661	-0.12332	0.0474066	0.461643	-1.53836	-4.12332	-4.12332	0.135199	-0.0375551	0.0466053	0.0393738	-0.29957	0.0931352	3.03514	2.94943
1	Ntome_NODE_10866_length_2088_cov_267	NIP51_ARATH^NIP51_ARATH^Q:1312-479,H:29-304^82.014%ID^E:1.97e-133^RecName: Full=Probable aquaporin NIP5-1;^Eukaryota; Viridiplantae; Streptophyta; Embryophyta; Tracheophyta; Spermatophyta; Magnoliopsida; eudicotyledons; Gunneridae; Pentapetalae; rosids; malvids; Brassicales; Brassicaceae; Camelineae; Arabidopsis	1.93241	2.93454	3.65834	0.388527	0.428534	1.24436	-7.39375	-5.04325	-7.39375	1.36916	1.03335	1.58344	1.07084	-0.692201	-0.511597	2.50304	2.88801
1	Ntome_NODE_10867_length_2088_cov_262	.	2.01392	1.91478	0.432055	0.565557	0.0273161	0.592026	-3.49163	-3.97551	-3.04116	0.936918	0.75725	0.4175	-3.0459	1.13705	0.680377	1.67196	2.40748
1	Ntome_NODE_10868_length_2088_cov_216	C3H30_ORYSJ^C3H30_ORYSJ^Q:386-1843,H:1-467^36.24%ID^E:4.88e-65^RecName: Full=Zinc finger CCCH domain-containing protein 30;^Eukaryota; Viridiplantae; Streptophyta; Embryophyta; Tracheophyta; Spermatophyta; Magnoliopsida; Liliopsida; Poales; Poaceae; BOP clade; Oryzoideae; Oryzeae; Oryzinae; Oryza; Oryza sativa	2.21371	1.6843	0.409213	0.423408	0.108213	-0.0800865	-5.0989	-5.0989	-4.00129	1.00586	0.67931	0.673515	1.27979	0.605143	0.398394	2.14903	2.64929
1	Ntome_NODE_10869_length_2088_cov_186	PUX3_ARATH^PUX3_ARATH^Q:881-411,H:144-302^61.635%ID^E:1.47e-49^RecName: Full=Plant UBX domain-containing protein 3 {ECO:0000303|Ref.6};^Eukaryota; Viridiplantae; Streptophyta; Embryophyta; Tracheophyta; Spermatophyta; Magnoliopsida; eudicotyledons; Gunneridae; Pentapetalae; rosids; malvids; Brassicales; Brassicaceae; Camelineae; Arabidopsis`PUX3_ARATH^PUX3_ARATH^Q:1932-1483,H:1-145^67.974%ID^E:1.…	1.34902	1.55624	-0.134041	0.324597	-0.378632	0.355249	-3.65609	-2.54108	-2.46383	0.806037	0.270179	0.148632	0.662971	0.582654	0.0202226	1.00962	2.08826
1	Ntome_NODE_1087_length_4970_cov_189	MDAR_SOLLC^MDAR_SOLLC^Q:1635-334,H:1-433^94.931%ID^E:0^RecName: Full=Monodehydroascorbate reductase;^Eukaryota; Viridiplantae; Streptophyta; Embryophyta; Tracheophyta; Spermatophyta; Magnoliopsida; eudicotyledons; Gunneridae; Pentapetalae; asterids; lamiids; Solanales; Solanaceae; Solanoideae; Solaneae; Solanum; Lycopersicon	1.72413	1.56461	-0.380487	0.37802	0.0909116	0.179226	-3.55848	-4.4311	-5.47731	0.743361	0.743293	0.580313	1.43588	0.955155	0.798994	2.12372	2.52978
1	Ntome_NODE_10870_length_2088_cov_133	SCKL2_ARATH^SCKL2_ARATH^Q:1558-338,H:164-581^66.268%ID^E:0^RecName: Full=Fructokinase-like 2, chloroplastic {ECO:0000303|PubMed:20511297};^Eukaryota; Viridiplantae; Streptophyta; Embryophyta; Tracheophyta; Spermatophyta; Magnoliopsida; eudicotyledons; Gunneridae; Pentapetalae; rosids; malvids; Brassicales; Brassicaceae; Camelineae; Arabidopsis	2.15589	1.46585	1.0903	0.221944	-0.152292	0.556169	-5.21967	-5.21967	-5.21967	0.464024	1.08063	1.01605	1.0585	1.26559	0.394449	1.78965	3.25225
1	Ntome_NODE_10872_length_2088_cov_80	PME3_PHAVU^PME3_PHAVU^Q:1926-196,H:1-581^61.092%ID^E:0^RecName: Full=Pectinesterase 3;^Eukaryota; Viridiplantae; Streptophyta; Embryophyta; Tracheophyta; Spermatophyta; Magnoliopsida; eudicotyledons; Gunneridae; Pentapetalae; rosids; fabids; Fabales; Fabaceae; Papilionoideae; 50 kb inversion clade; NPAAA clade; indigoferoid/millettioid clade; Phaseoleae; Phaseolus	0.341955	2.96358	0.378288	1.48117	2.19101	0.620261	-5.4672	-6.4672	-6.4672	3.90206	-0.444834	-0.79506	-0.163969	0.146919	0.673577	4.06804	3.03861
1	Ntome_NODE_10873_length_2088_cov_22	Y5720_ARATH^Y5720_ARATH^Q:182-2062,H:31-665^54.448%ID^E:0^RecName: Full=Probable inactive receptor kinase At5g67200;^Eukaryota; Viridiplantae; Streptophyta; Embryophyta; Tracheophyta; Spermatophyta; Magnoliopsida; eudicotyledons; Gunneridae; Pentapetalae; rosids; malvids; Brassicales; Brassicaceae; Camelineae; Arabidopsis	3.20196	2.86852	1.49307	1.79673	1.39128	1.70014	-6.32749	-4.73773	-6.32749	0.346769	0.991003	0.0791785	0.3555	-0.0765326	-1.23453	2.43066	2.04898
1	Ntome_NODE_10875_length_2087_cov_289	SCP49_ARATH^SCP49_ARATH^Q:1850-432,H:36-516^69.295%ID^E:0^RecName: Full=Serine carboxypeptidase-like 49;^Eukaryota; Viridiplantae; Streptophyta; Embryophyta; Tracheophyta; Spermatophyta; Magnoliopsida; eudicotyledons; Gunneridae; Pentapetalae; rosids; malvids; Brassicales; Brassicaceae; Camelineae; Arabidopsis	2.17801	2.08744	0.482978	0.706698	0.437389	0.827386	-6.69565	-6.57476	-5.98866	1.48451	0.748996	1.16541	1.52204	1.08306	0.948335	2.59381	2.99303
1	Ntome_NODE_10876_length_2087_cov_247	FKB43_ARATH^FKB43_ARATH^Q:1928-291,H:1-499^36.945%ID^E:8.3e-88^RecName: Full=Peptidyl-prolyl cis-trans isomerase FKBP43;^Eukaryota; Viridiplantae; Streptophyta; Embryophyta; Tracheophyta; Spermatophyta; Magnoliopsida; eudicotyledons; Gunneridae; Pentapetalae; rosids; malvids; Brassicales; Brassicaceae; Camelineae; Arabidopsis	0.529358	0.667409	-0.146708	0.511389	-0.492477	0.853292	-5.63856	-4.0488	-3.63856	1.2318	1.19534	0.773373	1.60937	1.27193	0.628038	1.84469	2.84912
1	Ntome_NODE_10877_length_2087_cov_208	ASOL_TOBAC^ASOL_TOBAC^Q:397-1962,H:9-541^51.407%ID^E:0^RecName: Full=L-ascorbate oxidase homolog;^Eukaryota; Viridiplantae; Streptophyta; Embryophyta; Tracheophyta; Spermatophyta; Magnoliopsida; eudicotyledons; Gunneridae; Pentapetalae; asterids; lamiids; Solanales; Solanaceae; Nicotianoideae; Nicotianeae; Nicotiana	3.76086	3.11813	1.29259	1.84903	1.56091	1.13321	-5.45138	-6.96234	-6.96234	-0.212672	-1.42691	-2.07238	1.09846	0.98591	0.249937	3.92183	4.11714
1	Ntome_NODE_10878_length_2087_cov_196	.	1.00449	0.634126	-0.916071	0.561976	0.634126	0.861536	-4.72343	-3.72343	-4.72343	0.891284	0.0314613	1.08393	1.99082	1.05793	1.18346	1.92043	2.23077
1	Ntome_NODE_10879_length_2087_cov_193	NIC2_ARATH^NIC2_ARATH^Q:657-1226,H:7-198^69.271%ID^E:5.64e-83^RecName: Full=Nicotinamidase 2 {ECO:0000305};^Eukaryota; Viridiplantae; Streptophyta; Embryophyta; Tracheophyta; Spermatophyta; Magnoliopsida; eudicotyledons; Gunneridae; Pentapetalae; rosids; malvids; Brassicales; Brassicaceae; Camelineae; Arabidopsis	1.83389	1.82618	0.151914	1.45679	0.857897	1.41025	-6.33222	-5.31787	-6.33222	0.8107	0.408029	0.354557	1.6342	0.4854	1.23002	2.43265	3.08984
1	Ntome_NODE_1088_length_4969_cov_181	SKIPA_ORYSJ^SKIPA_ORYSJ^Q:2890-4665,H:1-607^71.639%ID^E:0^RecName: Full=SNW/SKI-interacting protein A {ECO:0000305};^Eukaryota; Viridiplantae; Streptophyta; Embryophyta; Tracheophyta; Spermatophyta; Magnoliopsida; Liliopsida; Poales; Poaceae; BOP clade; Oryzoideae; Oryzeae; Oryzinae; Oryza; Oryza sativa	2.17008	1.96486	0.911092	1.04881	0.766743	0.926624	-7.07428	-4.28906	-6.06526	1.09846	0.51668	0.686107	1.19815	0.817935	0.611631	2.4078	2.30363
1	Ntome_NODE_10880_length_2087_cov_178	CRSH_ARATH^CRSH_ARATH^Q:1856-270,H:48-580^68.539%ID^E:0^RecName: Full=Probable GTP diphosphokinase CRSH, chloroplastic;^Eukaryota; Viridiplantae; Streptophyta; Embryophyta; Tracheophyta; Spermatophyta; Magnoliopsida; eudicotyledons; Gunneridae; Pentapetalae; rosids; malvids; Brassicales; Brassicaceae; Camelineae; Arabidopsis	1.97408	1.5696	-0.586797	-0.122128	-0.764678	0.364791	-4.49369	-4.49369	-4.49369	1.37914	1.30488	0.886557	1.86386	1.06458	-0.0401697	1.88135	2.70599
1	Ntome_NODE_10881_length_2087_cov_165	.	1.49226	1.30216	-0.328648	0.923926	0.552511	1.00741	-6.30547	-5.30547	-6.30547	1.6255	0.338387	1.6947	1.80858	0.52742	1.90418	2.13747	2.93054
1	Ntome_NODE_10882_length_2087_cov_103	PDLP2_ARATH^PDLP2_ARATH^Q:378-1040,H:24-244^67.568%ID^E:8.65e-98^RecName: Full=Plasmodesmata-located protein 2;^Eukaryota; Viridiplantae; Streptophyta; Embryophyta; Tracheophyta; Spermatophyta; Magnoliopsida; eudicotyledons; Gunneridae; Pentapetalae; rosids; malvids; Brassicales; Brassicaceae; Camelineae; Arabidopsis	1.69273	1.48824	0.36357	0.831145	0.728745	0.505294	-5.89184	-6.96223	-4.9372	1.3876	1.74861	0.758664	1.34716	1.02549	0.681914	2.14024	3.09187
1	Ntome_NODE_10884_length_2087_cov_67	FDL1_ARATH^FDL1_ARATH^Q:246-1076,H:6-281^33.219%ID^E:4.94e-30^RecName: Full=F-box/FBD/LRR-repeat protein At1g13570;^Eukaryota; Viridiplantae; Streptophyta; Embryophyta; Tracheophyta; Spermatophyta; Magnoliopsida; eudicotyledons; Gunneridae; Pentapetalae; rosids; malvids; Brassicales; Brassicaceae; Camelineae; Arabidopsis`FDL1_ARATH^FDL1_ARATH^Q:1106-1369,H:295-382^31.579%ID^E:4.94e-30^RecName: Fu…	1.13467	0.331275	-0.729033	0.629892	0.099321	0.34067	-4.18978	-4.18978	-4.18978	1.41103	1.17899	1.01929	0.330647	0.914142	0.809773	2.2644	2.83426
1	Ntome_NODE_10886_length_2086_cov_280	AB8I_ARATH^AB8I_ARATH^Q:1896-277,H:7-557^78.623%ID^E:0^RecName: Full=UPF0051 protein ABCI8, chloroplastic;^Eukaryota; Viridiplantae; Streptophyta; Embryophyta; Tracheophyta; Spermatophyta; Magnoliopsida; eudicotyledons; Gunneridae; Pentapetalae; rosids; malvids; Brassicales; Brassicaceae; Camelineae; Arabidopsis	1.66639	1.77123	0.867819	0.704618	0.223483	0.795465	-7.06469	-7.06469	-7.06469	1.65777	1.5439	1.49579	2.23523	1.42488	1.65106	2.50516	2.65127
1	Ntome_NODE_10887_length_2086_cov_237	P2C40_ARATH^P2C40_ARATH^Q:1774-290,H:2-491^61.277%ID^E:1.22e-161^RecName: Full=Probable protein phosphatase 2C 40;^Eukaryota; Viridiplantae; Streptophyta; Embryophyta; Tracheophyta; Spermatophyta; Magnoliopsida; eudicotyledons; Gunneridae; Pentapetalae; rosids; malvids; Brassicales; Brassicaceae; Camelineae; Arabidopsis	2.25086	1.77768	0.515695	-0.171564	0.316751	0.182953	-3.4906	-3.4906	-2.47625	0.64526	0.566847	-0.256409	-3.4906	0.925561	0.713381	2.34229	3.13875
1	Ntome_NODE_10888_length_2086_cov_233	CDPK3_ARATH^CDPK3_ARATH^Q:320-1693,H:66-523^79.476%ID^E:0^RecName: Full=Calcium-dependent protein kinase 3 {ECO:0000303|PubMed:12068094};^Eukaryota; Viridiplantae; Streptophyta; Embryophyta; Tracheophyta; Spermatophyta; Magnoliopsida; eudicotyledons; Gunneridae; Pentapetalae; rosids; malvids; Brassicales; Brassicaceae; Camelineae; Arabidopsis	2.26824	2.19662	1.08088	0.836303	0.437948	0.803527	-6.47195	-6.47195	-6.47195	1.25455	0.90648	0.601232	1.5228	1.34357	1.25706	1.72281	3.18382
1	Ntome_NODE_10889_length_2086_cov_179	ASB1_ARATH^ASB1_ARATH^Q:714-274,H:125-271^82.313%ID^E:4.36e-83^RecName: Full=Anthranilate synthase beta subunit 1, chloroplastic;^Eukaryota; Viridiplantae; Streptophyta; Embryophyta; Tracheophyta; Spermatophyta; Magnoliopsida; eudicotyledons; Gunneridae; Pentapetalae; rosids; malvids; Brassicales; Brassicaceae; Camelineae; Arabidopsis`ASB1_ARATH^ASB1_ARATH^Q:1862-1527,H:8-114^45.536%ID^E:1.08e-19…	2.67984	2.52403	1.1096	1.0974	0.580666	1.10314	-5.98432	-5.98432	-5.98432	0.891949	0.352675	0.444959	1.05009	1.0297	0.0581032	1.97406	3.05676
1	Ntome_NODE_1089_length_4965_cov_62	GSO1_ARATH^GSO1_ARATH^Q:1263-4736,H:23-1225^35.545%ID^E:0^RecName: Full=LRR receptor-like serine/threonine-protein kinase GSO1 {ECO:0000303|PubMed:18088309};^Eukaryota; Viridiplantae; Streptophyta; Embryophyta; Tracheophyta; Spermatophyta; Magnoliopsida; eudicotyledons; Gunneridae; Pentapetalae; rosids; malvids; Brassicales; Brassicaceae; Camelineae; Arabidopsis	1.96134	1.79959	1.50191	0.560801	-0.275701	0.560801	-4.08306	-4.08306	-4.08306	0.238873	-0.176165	-0.0830556	-0.761127	1.04623	-1.49809	2.82384	4.54994
1	Ntome_NODE_10890_length_2086_cov_159	SUF4_ARATH^SUF4_ARATH^Q:1905-1123,H:1-276^60.791%ID^E:6.5e-72^RecName: Full=Protein SUPPRESSOR OF FRI 4 {ECO:0000303|PubMed:17079264};^Eukaryota; Viridiplantae; Streptophyta; Embryophyta; Tracheophyta; Spermatophyta; Magnoliopsida; eudicotyledons; Gunneridae; Pentapetalae; rosids; malvids; Brassicales; Brassicaceae; Camelineae; Arabidopsis	1.63958	1.78993	0.0542811	0.303654	-0.0168743	-0.0392613	-3.43799	-5.93924	-4.04942	1.04727	0.812698	0.898481	1.23245	1.11572	0.708642	1.72474	2.15534
[truncated: 45,123 more rows]
