# Supplementary material for: Differential Gene Expression with an Emphasis on Floral Organ Size Differences in Natural and Synthetic Polyploids of Nicotiana tabacum (Solanaceae)
Source: Genes (Basel). 2020 Sep 19;11(9):1097. doi: 10.3390/genes11091097 (PMC7563459; doi:10.3390/genes11091097)
Supplement: Supplementary file 1 [file genes-11-01097-s001.zip › Supplemental Table S6.xlsx]

## Sheet: Sheet1
Subcluster	Contig	Annotation	QM2495A	QM2495B	QM2595A	QM2595B	QM2595C	Sylv95A	Sylv95B	Sylv95C	TAB09595A	TAB09595B	TAB09595C	TABC95A	TABC95B	TABC95C	Tom95A	Tom95B	Tom95C
1	Nsylvestris_NODE_1_length_19140_cov_79	MDN1_ARATH^MDN1_ARATH^Q:18292-2009,H:1-5400^47.199%ID^E:0^RecName: Full=Midasin {ECO:0000303|PubMed:23572950};^Eukaryota; Viridiplantae; Streptophyta; Embryophyta; Tracheophyta; Spermatophyta; Magnoliopsida; eudicotyledons; Gunneridae; Pentapetalae; rosids; malvids; Brassicales; Brassicaceae; Camelineae; Arabidopsis	0.945917	1.159	0.308537	0.276959	0.741082	1.2554	2.14436	1.14685	0.809125	0.880901	0.683633	0.85108	0.651121	0.439958	-3.9756	-3.65404	-4.66427
1	Nsylvestris_NODE_10_length_13090_cov_33	YG31B_YEAST^YG31B_YEAST^Q:8633-7719,H:535-827^32.258%ID^E:6.46e-31^RecName: Full=Transposon Ty3-G Gag-Pol polyprotein;^Eukaryota; Fungi; Dikarya; Ascomycota; Saccharomycotina; Saccharomycetes; Saccharomycetales; Saccharomycetaceae; Saccharomyces`YG31B_YEAST^YG31B_YEAST^Q:7633-7562,H:857-880^45.833%ID^E:6.46e-31^RecName: Full=Transposon Ty3-G Gag-Pol polyprotein;^Eukaryota; Fungi; Dikarya; Ascomyc…	3.00802	1.5641	-0.0639268	-0.154125	0.000203504	-1.10832	1.36741	1.05155	1.1205	0.810542	2.258	1.20456	2.64657	1.43084	-6.10832	-4.50425	-4.52336
1	Nsylvestris_NODE_100_length_8432_cov_116	NAT1_ARATH^NAT1_ARATH^Q:5315-3831,H:26-520^85.253%ID^E:0^RecName: Full=Nucleobase-ascorbate transporter 1;^Eukaryota; Viridiplantae; Streptophyta; Embryophyta; Tracheophyta; Spermatophyta; Magnoliopsida; eudicotyledons; Gunneridae; Pentapetalae; rosids; malvids; Brassicales; Brassicaceae; Camelineae; Arabidopsis	0.173464	0.664319	0.356253	-0.402449	0.290617	0.884043	1.93122	1.25532	0.364996	0.411979	0.21812	0.493751	0.366959	-0.276457	-1.88497	-2.3816	-2.46556
1	Nsylvestris_NODE_1000_length_4954_cov_107	BSL2_ARATH^BSL2_ARATH^Q:3378-4040,H:64-284^86.878%ID^E:2.38e-106^RecName: Full=Serine/threonine-protein phosphatase BSL2;^Eukaryota; Viridiplantae; Streptophyta; Embryophyta; Tracheophyta; Spermatophyta; Magnoliopsida; eudicotyledons; Gunneridae; Pentapetalae; rosids; malvids; Brassicales; Brassicaceae; Camelineae; Arabidopsis	-0.148452	-0.00529843	-0.911054	-0.812629	-0.352907	0.508996	1.92058	0.837144	0.758839	0.847615	0.362539	0.63755	1.12677	0.60885	-1.73549	-1.62559	-2.01746
1	Nsylvestris_NODE_10003_length_2115_cov_44	.	0.934961	0.507872	-0.774056	0.00639597	0.271139	0.94294	1.91932	-0.25975	0.851697	1.0088	0.132069	0.786863	0.967334	0.572799	-3.23309	-2.19757	-2.43773
1	Nsylvestris_NODE_10005_length_2114_cov_217	PGKH_TOBAC^PGKH_TOBAC^Q:1750-308,H:1-481^99.584%ID^E:0^RecName: Full=Phosphoglycerate kinase, chloroplastic;^Eukaryota; Viridiplantae; Streptophyta; Embryophyta; Tracheophyta; Spermatophyta; Magnoliopsida; eudicotyledons; Gunneridae; Pentapetalae; asterids; lamiids; Solanales; Solanaceae; Nicotianoideae; Nicotianeae; Nicotiana	-0.46365	0.0103336	-0.187729	-0.731369	-0.224069	0.990494	1.77026	1.08519	0.471381	0.929754	0.0616078	0.236564	0.041431	-0.576732	-0.839422	-1.35252	-1.22152
1	Nsylvestris_NODE_10006_length_2114_cov_210	P2C01_ARATH^P2C01_ARATH^Q:339-1724,H:1-460^69.684%ID^E:0^RecName: Full=Probable protein phosphatase 2C 1;^Eukaryota; Viridiplantae; Streptophyta; Embryophyta; Tracheophyta; Spermatophyta; Magnoliopsida; eudicotyledons; Gunneridae; Pentapetalae; rosids; malvids; Brassicales; Brassicaceae; Camelineae; Arabidopsis	0.864995	1.35155	1.02294	0.514404	0.976584	1.80978	2.64934	2.074	0.33413	0.240975	-0.559568	1.1972	1.46225	0.900705	-4.53896	-4.95652	-5.3438
1	Nsylvestris_NODE_10007_length_2114_cov_202	STP7_ARATH^STP7_ARATH^Q:1859-345,H:1-510^76.863%ID^E:0^RecName: Full=Sugar transport protein 7;^Eukaryota; Viridiplantae; Streptophyta; Embryophyta; Tracheophyta; Spermatophyta; Magnoliopsida; eudicotyledons; Gunneridae; Pentapetalae; rosids; malvids; Brassicales; Brassicaceae; Camelineae; Arabidopsis	1.03358	1.21998	0.968616	-0.0411709	0.754328	1.17923	2.14982	1.44273	0.364219	0.34671	0.707368	0.208206	1.02748	1.21889	-3.15965	-5.06565	-4.35467
1	Nsylvestris_NODE_10009_length_2114_cov_91	RAC1_LOTJA^RAC1_LOTJA^Q:2014-1655,H:1-120^90.833%ID^E:2.01e-68^RecName: Full=Rac-like GTP-binding protein RAC1;^Eukaryota; Viridiplantae; Streptophyta; Embryophyta; Tracheophyta; Spermatophyta; Magnoliopsida; eudicotyledons; Gunneridae; Pentapetalae; rosids; fabids; Fabales; Fabaceae; Papilionoideae; 50 kb inversion clade; NPAAA clade; Hologalegina; robinioid clade; Loteae; Lotus	0.541999	0.716296	0.254981	-0.0287548	1.27741	1.85188	2.30478	1.96465	0.764185	1.39104	0.403031	0.416895	1.32776	-0.150824	-4.76948	-3.51064	-4.7552
1	Nsylvestris_NODE_1001_length_4951_cov_111	POLX_TOBAC^POLX_TOBAC^Q:179-2923,H:1-915^98.798%ID^E:0^RecName: Full=Retrovirus-related Pol polyprotein from transposon TNT 1-94;^Eukaryota; Viridiplantae; Streptophyta; Embryophyta; Tracheophyta; Spermatophyta; Magnoliopsida; eudicotyledons; Gunneridae; Pentapetalae; asterids; lamiids; Solanales; Solanaceae; Nicotianoideae; Nicotianeae; Nicotiana`POLX_TOBAC^POLX_TOBAC^Q:4775-4951,H:865-923^91.52…	0.98045	0.517945	0.365404	-0.0674149	0.156848	0.249111	2.00971	0.881621	0.163967	0.144188	0.872958	0.840955	1.08697	0.351542	-2.9986	-2.88968	-2.66597
1	Nsylvestris_NODE_10011_length_2114_cov_44	GPAT1_ARATH^GPAT1_ARATH^Q:118-1572,H:7-545^54.529%ID^E:0^RecName: Full=Glycerol-3-phosphate acyltransferase 1;^Eukaryota; Viridiplantae; Streptophyta; Embryophyta; Tracheophyta; Spermatophyta; Magnoliopsida; eudicotyledons; Gunneridae; Pentapetalae; rosids; malvids; Brassicales; Brassicaceae; Camelineae; Arabidopsis`GPAT1_ARATH^GPAT1_ARATH^Q:1723-1863,H:538-584^68.085%ID^E:2.25e-11^RecName: Full=…	1.0727	0.754729	-0.62774	-0.305812	0.422886	1.45972	2.27915	1.00785	1.20876	1.34626	1.5649	0.23733	1.39779	1.16482	-2.11317	-5.4351	-5.4351
1	Nsylvestris_NODE_10014_length_2113_cov_229	SYNC1_ARATH^SYNC1_ARATH^Q:131-1849,H:11-572^68.912%ID^E:0^RecName: Full=Asparagine--tRNA ligase, cytoplasmic 1 {ECO:0000305};^Eukaryota; Viridiplantae; Streptophyta; Embryophyta; Tracheophyta; Spermatophyta; Magnoliopsida; eudicotyledons; Gunneridae; Pentapetalae; rosids; malvids; Brassicales; Brassicaceae; Camelineae; Arabidopsis	0.205189	0.493993	0.762574	0.321616	1.05033	0.724902	1.70371	1.13546	-0.107367	0.0529215	0.022762	0.0678555	0.26109	-0.105657	-2.29616	-2.26707	-2.02615
1	Nsylvestris_NODE_10017_length_2113_cov_207	.	0.985454	1.13055	0.518427	-0.416216	0.460219	0.476314	1.63313	1.17804	1.00088	1.15697	0.867773	0.718505	1.31563	0.342737	-3.04779	-4.79133	-3.52929
1	Nsylvestris_NODE_10018_length_2113_cov_206	HF101_ARATH^HF101_ARATH^Q:355-1716,H:76-529^87.885%ID^E:0^RecName: Full=Fe-S cluster assembly factor HCF101, chloroplastic;^Eukaryota; Viridiplantae; Streptophyta; Embryophyta; Tracheophyta; Spermatophyta; Magnoliopsida; eudicotyledons; Gunneridae; Pentapetalae; rosids; malvids; Brassicales; Brassicaceae; Camelineae; Arabidopsis	1.39361	-1.01105	-0.0514188	-1.05497	-0.372944	0.371656	2.26567	2.96441	-0.422118	-0.743421	-0.0992727	-0.500491	0.823197	0.462735	-0.733559	-1.67328	-1.61876
1	Nsylvestris_NODE_1002_length_4951_cov_41	TF29_SCHPO^TF29_SCHPO^Q:2316-3518,H:478-890^34.053%ID^E:1.09e-114^RecName: Full=Transposon Tf2-9 polyprotein;^Eukaryota; Fungi; Dikarya; Ascomycota; Taphrinomycotina; Schizosaccharomycetes; Schizosaccharomycetales; Schizosaccharomycetaceae; Schizosaccharomyces`TF29_SCHPO^TF29_SCHPO^Q:3556-4512,H:907-1220^33.125%ID^E:1.09e-114^RecName: Full=Transposon Tf2-9 polyprotein;^Eukaryota; Fungi; Dikarya; …	0.675887	1.66503	0.308156	0.108847	-0.558578	0.968669	1.84581	0.563413	1.37633	0.368315	1.37655	1.39835	1.18736	1.06903	-4.64604	-3.06108	-4.64604
1	Nsylvestris_NODE_10020_length_2113_cov_117	.	1.24533	0.846784	1.14224	0.846784	-0.0276851	0.63528	2.00206	1.90715	1.19471	0.474815	1.03121	-0.805293	0.63528	-0.29072	-3.61265	-3.61265	-3.61265
1	Nsylvestris_NODE_10021_length_2113_cov_116	DGP10_ARATH^DGP10_ARATH^Q:1620-193,H:107-583^78.407%ID^E:0^RecName: Full=Protease Do-like 10, mitochondrial;^Eukaryota; Viridiplantae; Streptophyta; Embryophyta; Tracheophyta; Spermatophyta; Magnoliopsida; eudicotyledons; Gunneridae; Pentapetalae; rosids; malvids; Brassicales; Brassicaceae; Camelineae; Arabidopsis	1.17648	1.4604	-0.0500396	-0.318247	0.58798	1.73066	2.25422	1.0999	0.152896	1.48626	0.249198	1.21866	0.314021	-0.903831	-3.8543	-2.74996	-3.8543
1	Nsylvestris_NODE_10022_length_2113_cov_114	PIGB_BOVIN^PIGB_BOVIN^Q:341-1828,H:58-537^40.909%ID^E:5.57e-117^RecName: Full=GPI mannosyltransferase 3;^Eukaryota; Metazoa; Chordata; Craniata; Vertebrata; Euteleostomi; Mammalia; Eutheria; Laurasiatheria; Cetartiodactyla; Ruminantia; Pecora; Bovidae; Bovinae; Bos	0.639047	0.475655	0.289324	-0.635041	0.790622	0.598939	2.65816	1.69205	1.06897	0.800692	0.980196	0.791103	1.59122	0.604972	-4.11531	-4.11531	-4.11531
1	Nsylvestris_NODE_10024_length_2113_cov_77	.	1.08777	1.14895	0.269245	0.0177066	0.431198	0.873317	2.19524	1.48013	0.669783	1.27931	1.12428	0.53228	1.30262	0.712003	-4.37461	-4.37461	-4.37461
1	Nsylvestris_NODE_10025_length_2113_cov_31	TMVRN_NICGU^TMVRN_NICGU^Q:457-2013,H:14-535^47.727%ID^E:1.31e-158^RecName: Full=TMV resistance protein N;^Eukaryota; Viridiplantae; Streptophyta; Embryophyta; Tracheophyta; Spermatophyta; Magnoliopsida; eudicotyledons; Gunneridae; Pentapetalae; asterids; lamiids; Solanales; Solanaceae; Nicotianoideae; Nicotianeae; Nicotiana	-0.113816	0.585182	-0.229293	-0.366797	0.330469	1.99811	2.18662	1.11248	0.258808	0.86367	1.5378	0.184573	1.67301	0.290735	-3.43719	-3.43719	-3.43719
1	Nsylvestris_NODE_10028_length_2112_cov_225	ASOL_TOBAC^ASOL_TOBAC^Q:1943-300,H:9-554^68.478%ID^E:0^RecName: Full=L-ascorbate oxidase homolog;^Eukaryota; Viridiplantae; Streptophyta; Embryophyta; Tracheophyta; Spermatophyta; Magnoliopsida; eudicotyledons; Gunneridae; Pentapetalae; asterids; lamiids; Solanales; Solanaceae; Nicotianoideae; Nicotianeae; Nicotiana	1.88647	-0.5497	2.29883	-0.203501	1.72161	-3.72446	-6.13045	0.836143	0.915475	0.60182	3.66296	-1.60751	5.38985	0.664227	-1.76448	-2.07473	-1.92256
1	Nsylvestris_NODE_10029_length_2112_cov_217	4CL2_TOBAC^4CL2_TOBAC^Q:202-1827,H:1-542^97.232%ID^E:0^RecName: Full=4-coumarate--CoA ligase 2;^Eukaryota; Viridiplantae; Streptophyta; Embryophyta; Tracheophyta; Spermatophyta; Magnoliopsida; eudicotyledons; Gunneridae; Pentapetalae; asterids; lamiids; Solanales; Solanaceae; Nicotianoideae; Nicotianeae; Nicotiana	1.26691	0.621875	1.36552	0.348991	1.60168	-3.29671	-0.29084	1.0538	1.32492	1.16538	0.570103	0.0294788	1.8215	0.392214	-3.89451	-1.20549	-2.87483
1	Nsylvestris_NODE_10030_length_2112_cov_212	.	0.62661	1.16987	0.576317	-0.186713	0.194981	1.70662	2.51394	1.74379	0.890184	0.963038	0.954915	0.9137	0.653298	-0.108917	-4.30715	-4.38494	-3.91955
1	Nsylvestris_NODE_10031_length_2112_cov_192	E138_ARATH^E138_ARATH^Q:1598-291,H:19-454^35.214%ID^E:1.73e-83^RecName: Full=Glucan endo-1,3-beta-glucosidase 8;^Eukaryota; Viridiplantae; Streptophyta; Embryophyta; Tracheophyta; Spermatophyta; Magnoliopsida; eudicotyledons; Gunneridae; Pentapetalae; rosids; malvids; Brassicales; Brassicaceae; Camelineae; Arabidopsis	1.34337	0.481281	1.54464	-0.18713	0.749488	2.11627	3.11598	2.47157	-0.55796	-0.222936	1.04917	-1.83547	3.34839	-0.835475	-5.0834	-5.0834	-2.41438
1	Nsylvestris_NODE_10033_length_2112_cov_143	UBA5_ARATH^UBA5_ARATH^Q:224-1318,H:1-364^80.654%ID^E:0^RecName: Full=Ubiquitin-like modifier-activating enzyme 5;^Eukaryota; Viridiplantae; Streptophyta; Embryophyta; Tracheophyta; Spermatophyta; Magnoliopsida; eudicotyledons; Gunneridae; Pentapetalae; rosids; malvids; Brassicales; Brassicaceae; Camelineae; Arabidopsis	-0.0270883	-0.196253	0.748455	0.199194	0.816544	1.0837	2.01294	1.484	0.0227998	-0.100449	0.683673	0.297606	0.684186	-0.327004	-1.75736	-2.67026	-2.95468
1	Nsylvestris_NODE_10037_length_2111_cov_225	RH39_ARATH^RH39_ARATH^Q:1968-490,H:33-525^75.855%ID^E:0^RecName: Full=DEAD-box ATP-dependent RNA helicase 39;^Eukaryota; Viridiplantae; Streptophyta; Embryophyta; Tracheophyta; Spermatophyta; Magnoliopsida; eudicotyledons; Gunneridae; Pentapetalae; rosids; malvids; Brassicales; Brassicaceae; Camelineae; Arabidopsis	0.658871	0.940125	0.472357	-0.325978	0.317947	1.38701	2.11192	0.922747	-0.106601	-0.0364926	0.2478	0.288563	0.010341	-0.196048	-2.20514	-2.09937	-2.38805
1	Nsylvestris_NODE_1004_length_4947_cov_63	LAG12_ARATH^LAG12_ARATH^Q:493-825,H:55-166^66.964%ID^E:2.31e-44^RecName: Full=LAG1 longevity assurance homolog 2;^Eukaryota; Viridiplantae; Streptophyta; Embryophyta; Tracheophyta; Spermatophyta; Magnoliopsida; eudicotyledons; Gunneridae; Pentapetalae; rosids; malvids; Brassicales; Brassicaceae; Camelineae; Arabidopsis	0.491673	0.260623	0.295984	0.345112	0.333365	0.644129	1.81291	0.449231	0.363876	-0.512106	0.771595	0.78804	0.982697	0.0731589	-2.08291	-1.9805	-3.03688
1	Nsylvestris_NODE_10042_length_2111_cov_144	.	1.33117	1.28066	0.35296	0.220656	0.76258	0.454119	1.75442	1.64048	0.805952	0.906719	1.33657	1.15158	1.39942	0.449853	-5.21264	-5.21264	-3.42187
1	Nsylvestris_NODE_10043_length_2111_cov_132	ACOX4_ARATH^ACOX4_ARATH^Q:1908-982,H:1-309^80.583%ID^E:0^RecName: Full=Acyl-coenzyme A oxidase 4, peroxisomal;^Eukaryota; Viridiplantae; Streptophyta; Embryophyta; Tracheophyta; Spermatophyta; Magnoliopsida; eudicotyledons; Gunneridae; Pentapetalae; rosids; malvids; Brassicales; Brassicaceae; Camelineae; Arabidopsis	0.190913	-0.977033	-0.546399	-1.24183	-0.261069	0.88135	2.86911	2.6031	1.1711	0.629927	1.82958	0.0906404	1.07612	0.479765	-2.84767	-2.583	-3.3646
1	Nsylvestris_NODE_10046_length_2110_cov_228	ATO_ARATH^ATO_ARATH^Q:179-1708,H:1-504^74.314%ID^E:0^RecName: Full=Splicing factor SF3a60 homolog {ECO:0000305};^Eukaryota; Viridiplantae; Streptophyta; Embryophyta; Tracheophyta; Spermatophyta; Magnoliopsida; eudicotyledons; Gunneridae; Pentapetalae; rosids; malvids; Brassicales; Brassicaceae; Camelineae; Arabidopsis	0.365711	0.743614	1.1638	0.315061	0.885001	0.895848	1.43489	0.512307	0.426954	0.666725	0.489207	0.298994	0.676409	0.0442639	-3.10682	-2.77952	-3.03244
1	Nsylvestris_NODE_10048_length_2110_cov_219	MRS21_ARATH^MRS21_ARATH^Q:1798-464,H:1-442^84.305%ID^E:0^RecName: Full=Magnesium transporter MRS2-1;^Eukaryota; Viridiplantae; Streptophyta; Embryophyta; Tracheophyta; Spermatophyta; Magnoliopsida; eudicotyledons; Gunneridae; Pentapetalae; rosids; malvids; Brassicales; Brassicaceae; Camelineae; Arabidopsis	0.163743	0.655004	0.566556	-0.503662	0.204338	0.916076	1.7943	1.95247	0.533071	0.692129	0.851698	0.387411	0.426777	0.132166	-2.53436	-2.81792	-3.4198
1	Nsylvestris_NODE_10051_length_2110_cov_212	UREA_ARATH^UREA_ARATH^Q:201-2108,H:1-640^76.562%ID^E:0^RecName: Full=Urease;^Eukaryota; Viridiplantae; Streptophyta; Embryophyta; Tracheophyta; Spermatophyta; Magnoliopsida; eudicotyledons; Gunneridae; Pentapetalae; rosids; malvids; Brassicales; Brassicaceae; Camelineae; Arabidopsis	1.90907	1.09916	0.37924	0.329814	0.87184	1.49066	2.24129	1.0957	0.972124	-0.0239502	0.462464	0.715534	1.28504	0.962303	-3.11549	-6.57624	-4.09856
1	Nsylvestris_NODE_10052_length_2110_cov_201	CRTSO_DAUCA^CRTSO_DAUCA^Q:2105-288,H:1-602^31.045%ID^E:2.98e-50^RecName: Full=Prolycopene isomerase, chloroplastic;^Eukaryota; Viridiplantae; Streptophyta; Embryophyta; Tracheophyta; Spermatophyta; Magnoliopsida; eudicotyledons; Gunneridae; Pentapetalae; asterids; campanulids; Apiales; Apiaceae; Apioideae; Scandiceae; Daucinae; Daucus; Daucus sect. Daucus	0.600467	0.148321	0.421469	-0.847425	0.294071	1.72734	3.63723	3.16216	0.468193	0.463769	1.09848	0.285893	0.415235	0.824952	-2.68636	-5.69892	-4.31487
1	Nsylvestris_NODE_10053_length_2110_cov_167	AHL5_ARATH^AHL5_ARATH^Q:1026-424,H:159-378^49.333%ID^E:1.14e-44^RecName: Full=AT-hook motif nuclear-localized protein 5 {ECO:0000312|EMBL:FAA00276.1};^Eukaryota; Viridiplantae; Streptophyta; Embryophyta; Tracheophyta; Spermatophyta; Magnoliopsida; eudicotyledons; Gunneridae; Pentapetalae; rosids; malvids; Brassicales; Brassicaceae; Camelineae; Arabidopsis	-1.42413	1.22482	-1.59865	-0.0342489	0.306435	2.07197	2.19396	0.721473	-0.100928	0.506396	-0.371637	-0.600455	-0.507909	0.0428238	-0.329179	-2.24713	0.146395
1	Nsylvestris_NODE_10055_length_2110_cov_115	PUB4_ARATH^PUB4_ARATH^Q:1365-652,H:531-774^27.347%ID^E:2.08e-11^RecName: Full=U-box domain-containing protein 4;^Eukaryota; Viridiplantae; Streptophyta; Embryophyta; Tracheophyta; Spermatophyta; Magnoliopsida; eudicotyledons; Gunneridae; Pentapetalae; rosids; malvids; Brassicales; Brassicaceae; Camelineae; Arabidopsis`PUB4_ARATH^PUB4_ARATH^Q:1200-643,H:546-736^30.208%ID^E:1.07e-08^RecName: Full=U…	0.914824	0.900957	0.377239	-0.267644	0.377239	1.63318	1.87934	1.6652	0.990632	0.857103	0.811874	0.793978	0.666672	0.854803	-3.76452	-3.89778	-4.79309
1	Nsylvestris_NODE_10058_length_2109_cov_233	T2FA_ARATH^T2FA_ARATH^Q:1999-395,H:1-543^56.584%ID^E:2.89e-164^RecName: Full=Transcription initiation factor IIF subunit alpha;^Eukaryota; Viridiplantae; Streptophyta; Embryophyta; Tracheophyta; Spermatophyta; Magnoliopsida; eudicotyledons; Gunneridae; Pentapetalae; rosids; malvids; Brassicales; Brassicaceae; Camelineae; Arabidopsis`T2FA_ARATH^T2FA_ARATH^Q:583-398,H:572-634^50.794%ID^E:6.77e-09^R…	0.60091	0.457741	0.23895	-0.339997	0.143517	1.56447	2.41285	1.45233	0.897597	0.83355	0.847231	0.757544	1.3287	0.779945	-3.98172	-3.78775	-4.20587
1	Nsylvestris_NODE_1006_length_4941_cov_231	CLU_ARATH^CLU_ARATH^Q:4774-566,H:1-1399^66.667%ID^E:0^RecName: Full=Clustered mitochondria protein;^Eukaryota; Viridiplantae; Streptophyta; Embryophyta; Tracheophyta; Spermatophyta; Magnoliopsida; eudicotyledons; Gunneridae; Pentapetalae; rosids; malvids; Brassicales; Brassicaceae; Camelineae; Arabidopsis	0.938051	1.01846	-0.155844	-0.0776087	0.558715	0.597692	1.57143	0.69955	0.999677	0.767222	0.54314	0.739469	0.938434	0.129973	-2.90349	-2.94441	-3.42046
1	Nsylvestris_NODE_10062_length_2109_cov_190	2A5K_ARATH^2A5K_ARATH^Q:970-2109,H:1-382^71.503%ID^E:0^RecName: Full=Serine/threonine protein phosphatase 2A 57 kDa regulatory subunit B' kappa isoform;^Eukaryota; Viridiplantae; Streptophyta; Embryophyta; Tracheophyta; Spermatophyta; Magnoliopsida; eudicotyledons; Gunneridae; Pentapetalae; rosids; malvids; Brassicales; Brassicaceae; Camelineae; Arabidopsis	-0.130693	0.924182	1.26783	-0.134306	0.948297	1.54472	2.10729	1.70716	-0.497703	0.536331	-0.297284	0.921401	0.80209	-0.390988	-3.28197	-3.36105	-2.6653
1	Nsylvestris_NODE_10063_length_2109_cov_108	RER1B_ARATH^RER1B_ARATH^Q:1192-1743,H:1-183^63.043%ID^E:8.7e-77^RecName: Full=Protein RER1B;^Eukaryota; Viridiplantae; Streptophyta; Embryophyta; Tracheophyta; Spermatophyta; Magnoliopsida; eudicotyledons; Gunneridae; Pentapetalae; rosids; malvids; Brassicales; Brassicaceae; Camelineae; Arabidopsis	0.474274	1.03149	0.174448	0.240012	0.03129	1.13304	1.73724	1.62368	0.563432	1.11541	0.0676689	0.820219	0.666451	0.681762	-5.17074	-2.29692	-2.89275
1	Nsylvestris_NODE_10064_length_2109_cov_62	BSK1_ARATH^BSK1_ARATH^Q:1579-1163,H:121-259^79.137%ID^E:1.49e-69^RecName: Full=Serine/threonine-protein kinase BSK1 {ECO:0000305};^Eukaryota; Viridiplantae; Streptophyta; Embryophyta; Tracheophyta; Spermatophyta; Magnoliopsida; eudicotyledons; Gunneridae; Pentapetalae; rosids; malvids; Brassicales; Brassicaceae; Camelineae; Arabidopsis`BSK1_ARATH^BSK1_ARATH^Q:571-143,H:244-380^86.014%ID^E:1.85e-6…	1.08272	0.576194	0.649406	-0.138689	0.590953	0.925673	1.47216	0.57062	0.999091	1.35249	0.750645	1.34869	1.44754	0.494659	-3.35501	-4.38358	-4.38358
1	Nsylvestris_NODE_10065_length_2108_cov_204	P2C39_ARATH^P2C39_ARATH^Q:939-1781,H:1-289^77.855%ID^E:2.5e-148^RecName: Full=Probable protein phosphatase 2C 39;^Eukaryota; Viridiplantae; Streptophyta; Embryophyta; Tracheophyta; Spermatophyta; Magnoliopsida; eudicotyledons; Gunneridae; Pentapetalae; rosids; malvids; Brassicales; Brassicaceae; Camelineae; Arabidopsis	-0.0100072	0.0532354	0.844116	-0.393227	-0.43576	0.93855	1.79586	1.5846	0.594401	0.532317	1.5185	-0.348477	2.04487	0.0610075	-2.87942	-2.58869	-3.31188
1	Nsylvestris_NODE_10066_length_2108_cov_162	.	0.264264	1.46104	0.752891	-0.0543147	0.48372	2.16937	2.17009	1.60236	-0.173871	1.20414	0.3248	0.253325	0.0712597	0.0264912	-3.81234	-3.55995	-3.18327
1	Nsylvestris_NODE_10067_length_2108_cov_104	TOLB_PELCD^TOLB_PELCD^Q:1240-2037,H:169-426^26.871%ID^E:2.62e-14^RecName: Full=Tol-Pal system protein TolB {ECO:0000255|HAMAP-Rule:MF_00671};^Bacteria; Proteobacteria; Deltaproteobacteria; Desulfuromonadales; Desulfuromonadaceae; Pelobacter	1.7946	1.24226	1.20767	-0.663187	1.14468	1.42428	1.79263	1.42428	-0.203756	0.336813	0.506738	0.243703	1.23212	-0.493262	-3.66319	-3.66319	-3.66319
1	Nsylvestris_NODE_10068_length_2108_cov_38	FK151_ARATH^FK151_ARATH^Q:1915-1805,H:25-61^75.676%ID^E:8.3e-12^RecName: Full=Peptidyl-prolyl cis-trans isomerase FKBP15-1;^Eukaryota; Viridiplantae; Streptophyta; Embryophyta; Tracheophyta; Spermatophyta; Magnoliopsida; eudicotyledons; Gunneridae; Pentapetalae; rosids; malvids; Brassicales; Brassicaceae; Camelineae; Arabidopsis	0.701763	1.10729	1.28711	0.264541	1.19522	1.42894	2.26121	2.15593	0.0839795	0.933592	0.633321	-0.20082	0.676636	-0.652928	-4.06748	-3.90276	-3.90554
1	Nsylvestris_NODE_10074_length_2106_cov_233	PDI_DATGL^PDI_DATGL^Q:193-1629,H:22-502^55.394%ID^E:2.52e-178^RecName: Full=Protein disulfide-isomerase;^Eukaryota; Viridiplantae; Streptophyta; Embryophyta; Tracheophyta; Spermatophyta; Magnoliopsida; eudicotyledons; Gunneridae; Pentapetalae; rosids; fabids; Cucurbitales; Datiscaceae; Datisca	0.659718	1.29142	0.885612	0.36251	1.0563	1.61974	2.18241	1.73761	0.211177	0.913438	0.389134	0.528589	0.350325	0.298065	-4.12251	-4.98679	-3.37674
1	Nsylvestris_NODE_10078_length_2106_cov_50	.	0.809488	0.232458	-0.219523	-0.446933	0.319015	0.345262	1.83214	0.217882	-0.378221	0.239909	-0.280923	0.533404	1.10241	0.570554	-2.26223	-1.22434	-1.39035
1	Nsylvestris_NODE_10079_length_2106_cov_40	MDLL_ARATH^MDLL_ARATH^Q:206-1765,H:33-552^70.577%ID^E:0^RecName: Full=(R)-mandelonitrile lyase-like;^Eukaryota; Viridiplantae; Streptophyta; Embryophyta; Tracheophyta; Spermatophyta; Magnoliopsida; eudicotyledons; Gunneridae; Pentapetalae; rosids; malvids; Brassicales; Brassicaceae; Camelineae; Arabidopsis	0.946467	0.990861	-0.298645	1.35586	1.21325	0.923747	0.727827	-0.0993366	1.15592	1.19439	0.779357	0.0757501	1.45426	1.15592	-3.46857	-5.05353	-3.05353
1	Nsylvestris_NODE_1008_length_4940_cov_60	LORF2_HUMAN^LORF2_HUMAN^Q:1894-764,H:513-888^29.351%ID^E:1.31e-40^RecName: Full=LINE-1 retrotransposable element ORF2 protein;^Eukaryota; Metazoa; Chordata; Craniata; Vertebrata; Euteleostomi; Mammalia; Eutheria; Euarchontoglires; Primates; Haplorrhini; Catarrhini; Hominidae; Homo`LORF2_HUMAN^LORF2_HUMAN^Q:2301-1942,H:382-498^24.031%ID^E:1.31e-40^RecName: Full=LINE-1 retrotransposable element ORF…	1.88225	1.42973	-0.0108386	-0.117754	0.467209	1.20417	2.07662	0.503735	0.574124	1.44859	1.31109	1.29033	1.48559	0.909727	-4.81819	-4.81819	-4.81819
1	Nsylvestris_NODE_10085_length_2105_cov_74	.	0.172049	0.519972	0.0345453	-0.70242	0.172049	0.467505	1.94144	1.20447	1.66192	1.68715	1.85483	1.44054	1.51997	0.888142	-4.28738	-4.28738	-4.28738
1	Nsylvestris_NODE_10089_length_2104_cov_175	ARP_ARATH^ARP_ARATH^Q:129-1682,H:36-536^56.298%ID^E:0^RecName: Full=DNA-(apurinic or apyrimidinic site) lyase, chloroplastic {ECO:0000303|PubMed:7512729};^Eukaryota; Viridiplantae; Streptophyta; Embryophyta; Tracheophyta; Spermatophyta; Magnoliopsida; eudicotyledons; Gunneridae; Pentapetalae; rosids; malvids; Brassicales; Brassicaceae; Camelineae; Arabidopsis	1.08645	1.12587	1.01354	0.359362	0.303287	1.23868	2.34787	1.8154	0.658418	0.458206	0.574429	1.0128	1.53785	1.07736	-4.86984	-4.86984	-4.86984
1	Nsylvestris_NODE_10090_length_2104_cov_151	RS13_SOYBN^RS13_SOYBN^Q:1264-812,H:1-151^96.026%ID^E:3.73e-96^RecName: Full=40S ribosomal protein S13;^Eukaryota; Viridiplantae; Streptophyta; Embryophyta; Tracheophyta; Spermatophyta; Magnoliopsida; eudicotyledons; Gunneridae; Pentapetalae; rosids; fabids; Fabales; Fabaceae; Papilionoideae; 50 kb inversion clade; NPAAA clade; indigoferoid/millettioid clade; Phaseoleae; Glycine; Soja	-0.163281	0.996133	0.682996	-0.0367918	0.601429	0.620636	1.27051	0.781679	-0.375453	0.536538	0.43095	0.136238	-0.839265	-0.776141	-1.15695	-1.55346	-1.15577
1	Nsylvestris_NODE_10091_length_2104_cov_71	RHIE_DICD3^RHIE_DICD3^Q:170-2080,H:23-577^24.655%ID^E:6.14e-30^RecName: Full=Rhamnogalacturonate lyase;^Bacteria; Proteobacteria; Gammaproteobacteria; Enterobacterales; Pectobacteriaceae; Dickeya	-0.795157	-0.209508	-0.0789504	-1.60251	-1.14308	1.60792	1.92042	1.06991	0.665023	0.99621	0.760308	0.00747893	-1.43259	-0.280584	-0.252015	-1.79104	0.558166
1	Nsylvestris_NODE_10093_length_2104_cov_34	.	1.53953	0.732173	0.276494	-0.393358	0.356664	2.14721	2.9021	1.71707	-1.15235	0.00519148	-0.393358	-0.267827	1.35666	0.14721	-2.85279	-3.26783	-2.85279
1	Nsylvestris_NODE_10094_length_2104_cov_32	POLR1_ARATH^POLR1_ARATH^Q:730-23,H:319-531^28.395%ID^E:1.35e-11^RecName: Full=Retrovirus-related Pol polyprotein from transposon RE1;^Eukaryota; Viridiplantae; Streptophyta; Embryophyta; Tracheophyta; Spermatophyta; Magnoliopsida; eudicotyledons; Gunneridae; Pentapetalae; rosids; malvids; Brassicales; Brassicaceae; Camelineae; Arabidopsis	0.533089	1.11805	0.813197	-1.27427	0.310697	0.813197	1.04766	1.85502	0.725735	1.3107	0.89566	0.813197	0.0476626	0.813197	-3.27427	-3.27427	-3.27427
1	Nsylvestris_NODE_10098_length_2103_cov_106	.	1.19542	1.8031	0.890563	1.19542	0.70999	1.12503	1.93238	0.503539	-0.611938	-0.1969	-0.874972	1.55799	0.388062	-0.0269753	-3.1969	-3.1969	-3.1969
1	Nsylvestris_NODE_1010_length_4933_cov_58	.	-0.00886271	0.373793	-0.0877984	-0.158962	0.0511453	1.66159	1.8013	0.861313	-0.0564424	-0.0390083	-0.189006	-0.0241276	0.627801	-0.2996	-0.808379	-0.749883	-2.95486
1	Nsylvestris_NODE_10100_length_2102_cov_224	KPK2_ARATH^KPK2_ARATH^Q:1671-256,H:1-468^67.22%ID^E:0^RecName: Full=Serine/threonine-protein kinase AtPK2/AtPK19;^Eukaryota; Viridiplantae; Streptophyta; Embryophyta; Tracheophyta; Spermatophyta; Magnoliopsida; eudicotyledons; Gunneridae; Pentapetalae; rosids; malvids; Brassicales; Brassicaceae; Camelineae; Arabidopsis	-0.168274	0.0381814	0.0972158	-0.54825	-0.284037	0.184901	1.38112	0.369689	0.5449	0.729518	-0.106885	0.739835	0.558398	0.685376	-1.30821	-2.03813	-0.875349
1	Nsylvestris_NODE_10102_length_2102_cov_194	FAHD1_ARATH^FAHD1_ARATH^Q:1024-377,H:3-218^76.852%ID^E:1.59e-106^RecName: Full=Probable acylpyruvase FAHD1, mitochondrial {ECO:0000305};^Eukaryota; Viridiplantae; Streptophyta; Embryophyta; Tracheophyta; Spermatophyta; Magnoliopsida; eudicotyledons; Gunneridae; Pentapetalae; rosids; malvids; Brassicales; Brassicaceae; Camelineae; Arabidopsis	0.436271	1.48846	0.599664	0.276361	0.674472	1.34865	1.77636	1.76498	0.882577	0.941508	0.635768	0.867604	0.872917	0.351555	-3.59183	-4.25898	-5.06634
1	Nsylvestris_NODE_10105_length_2102_cov_133	.	0.878781	1.17097	0.759957	-0.0838536	0.137631	0.827752	2.02027	1.20196	1.32886	1.47614	0.985302	0.79066	1.39661	1.00565	-4.96796	-3.96077	-4.96796
1	Nsylvestris_NODE_10106_length_2102_cov_125	TOM3_TOBAC^TOM3_TOBAC^Q:1491-610,H:1-294^99.66%ID^E:0^RecName: Full=Tobamovirus multiplication protein 3;^Eukaryota; Viridiplantae; Streptophyta; Embryophyta; Tracheophyta; Spermatophyta; Magnoliopsida; eudicotyledons; Gunneridae; Pentapetalae; asterids; lamiids; Solanales; Solanaceae; Nicotianoideae; Nicotianeae; Nicotiana	0.656481	0.717602	0.189295	0.0153778	0.823377	0.486177	2.07658	2.15595	0.225506	0.445029	0.491328	0.0891528	1.23257	-0.0674921	-2.31019	-4.78682	-2.43993
1	Nsylvestris_NODE_10107_length_2102_cov_100	FUT12_ARATH^FUT12_ARATH^Q:1875-394,H:38-513^64.242%ID^E:0^RecName: Full=Putative fucosyltransferase-like protein;^Eukaryota; Viridiplantae; Streptophyta; Embryophyta; Tracheophyta; Spermatophyta; Magnoliopsida; eudicotyledons; Gunneridae; Pentapetalae; rosids; malvids; Brassicales; Brassicaceae; Camelineae; Arabidopsis	0.187566	0.439757	0.219811	-0.089052	0.0429673	0.941216	1.8306	0.94804	0.813303	0.405977	1.0884	0.717683	0.405293	0.599519	-2.53936	-3.92315	-2.08857
1	Nsylvestris_NODE_10108_length_2102_cov_64	GDL74_ARATH^GDL74_ARATH^Q:1382-1867,H:162-320^47.531%ID^E:4.38e-47^RecName: Full=GDSL esterase/lipase At5g03980;^Eukaryota; Viridiplantae; Streptophyta; Embryophyta; Tracheophyta; Spermatophyta; Magnoliopsida; eudicotyledons; Gunneridae; Pentapetalae; rosids; malvids; Brassicales; Brassicaceae; Camelineae; Arabidopsis`GDL74_ARATH^GDL74_ARATH^Q:318-848,H:24-161^37.288%ID^E:8.45e-26^RecName: Full=G…	0.252878	0.437303	1.07885	0.747643	1.2853	1.67609	2.3633	1.98327	0.651428	0.651428	0.0413741	-0.119091	1.31701	0.252878	-4.20655	-4.20655	-4.20655
1	Nsylvestris_NODE_1011_length_4932_cov_20	POLX_TOBAC^POLX_TOBAC^Q:1592-3541,H:2-659^41.679%ID^E:6.77e-160^RecName: Full=Retrovirus-related Pol polyprotein from transposon TNT 1-94;^Eukaryota; Viridiplantae; Streptophyta; Embryophyta; Tracheophyta; Spermatophyta; Magnoliopsida; eudicotyledons; Gunneridae; Pentapetalae; asterids; lamiids; Solanales; Solanaceae; Nicotianoideae; Nicotianeae; Nicotiana	0.0305755	-0.268321	-1.26705	-1.44762	-0.496529	1.15534	2.49073	0.47838	1.07494	0.998283	0.854943	1.05403	1.30013	0.706186	-2.93228	-1.54716	-2.18459
1	Nsylvestris_NODE_10110_length_2102_cov_49	.	0.428264	1.19928	0.662729	-0.659199	0.415477	0.864363	1.95551	1.04124	1.86436	0.511527	0.340801	1.54752	1.295	-0.489274	-3.6592	-3.6592	-3.6592
1	Nsylvestris_NODE_10113_length_2101_cov_175	SCP50_ARATH^SCP50_ARATH^Q:1817-552,H:28-438^57.21%ID^E:1.22e-169^RecName: Full=Serine carboxypeptidase-like 50;^Eukaryota; Viridiplantae; Streptophyta; Embryophyta; Tracheophyta; Spermatophyta; Magnoliopsida; eudicotyledons; Gunneridae; Pentapetalae; rosids; malvids; Brassicales; Brassicaceae; Camelineae; Arabidopsis	0.903639	1.06204	0.375748	-0.00164115	0.919	2.05379	2.35833	1.52485	0.18396	0.532164	0.00406952	0.146717	0.45939	-0.043232	-4.47904	-3.00517	-2.99462
1	Nsylvestris_NODE_10115_length_2101_cov_135	ANXD3_ARATH^ANXD3_ARATH^Q:910-1863,H:1-321^57.944%ID^E:1.08e-132^RecName: Full=Annexin D3;^Eukaryota; Viridiplantae; Streptophyta; Embryophyta; Tracheophyta; Spermatophyta; Magnoliopsida; eudicotyledons; Gunneridae; Pentapetalae; rosids; malvids; Brassicales; Brassicaceae; Camelineae; Arabidopsis	-0.567201	0.309284	0.720316	0.345105	0.197855	3.08413	3.09985	0.701985	0.758805	0.620956	0.624329	1.00359	0.510217	0.859965	-3.99184	-4.0635	-4.21383
1	Nsylvestris_NODE_10116_length_2101_cov_125	HPT1_ARATH^HPT1_ARATH^Q:1075-2100,H:32-363^68.129%ID^E:9.5e-157^RecName: Full=Homogentisate phytyltransferase 1, chloroplastic;^Eukaryota; Viridiplantae; Streptophyta; Embryophyta; Tracheophyta; Spermatophyta; Magnoliopsida; eudicotyledons; Gunneridae; Pentapetalae; rosids; malvids; Brassicales; Brassicaceae; Camelineae; Arabidopsis	1.29296	1.15391	0.833224	0.0420495	0.659895	1.7301	2.76549	2.79584	0.462915	0.0503467	0.856779	-0.278146	0.757098	0.325618	-3.36675	-4.84707	-5.23426
1	Nsylvestris_NODE_10117_length_2101_cov_105	Y5848_ARATH^Y5848_ARATH^Q:201-428,H:1-77^53.247%ID^E:2.37e-13^RecName: Full=Uncharacterized protein At5g48480;^Eukaryota; Viridiplantae; Streptophyta; Embryophyta; Tracheophyta; Spermatophyta; Magnoliopsida; eudicotyledons; Gunneridae; Pentapetalae; rosids; malvids; Brassicales; Brassicaceae; Camelineae; Arabidopsis	1.65293	1.24997	-0.186783	-0.0372674	1.08803	1.56495	2.40654	1.35037	0.693961	1.06437	0.0643349	-0.71201	1.14593	-0.0319343	-3.37451	-4.12497	-3.81393
1	Nsylvestris_NODE_10119_length_2100_cov_204	RRA3_ARATH^RRA3_ARATH^Q:387-1661,H:1-428^73.256%ID^E:0^RecName: Full=Arabinosyltransferase RRA3 {ECO:0000305};^Eukaryota; Viridiplantae; Streptophyta; Embryophyta; Tracheophyta; Spermatophyta; Magnoliopsida; eudicotyledons; Gunneridae; Pentapetalae; rosids; malvids; Brassicales; Brassicaceae; Camelineae; Arabidopsis	0.394763	0.799358	0.243381	0.0841382	0.653894	1.05721	2.04169	1.58015	0.574678	0.475226	0.0171313	0.558748	1.03762	0.15115	-2.98487	-2.95395	-3.73034
1	Nsylvestris_NODE_1012_length_4931_cov_155	MP702_ARATH^MP702_ARATH^Q:4519-2708,H:4-623^75.478%ID^E:0^RecName: Full=Microtubule-associated protein 70-2;^Eukaryota; Viridiplantae; Streptophyta; Embryophyta; Tracheophyta; Spermatophyta; Magnoliopsida; eudicotyledons; Gunneridae; Pentapetalae; rosids; malvids; Brassicales; Brassicaceae; Camelineae; Arabidopsis	-0.250319	0.477178	-0.0818843	-0.287954	0.205416	1.50641	2.33805	1.1154	0.391393	-0.118206	-0.631112	0.372805	0.465763	-0.213495	-1.25631	-2.30386	-1.72928
1	Nsylvestris_NODE_10122_length_2100_cov_199	YQEG_BACSU^YQEG_BACSU^Q:809-288,H:3-166^28.571%ID^E:1.42e-11^RecName: Full=Uncharacterized protein YqeG;^Bacteria; Firmicutes; Bacilli; Bacillales; Bacillaceae; Bacillus	0.508802	0.83489	0.85398	-0.568114	0.0396724	1.31016	2.0602	1.68029	0.485149	0.650946	0.639653	0.39764	0.696547	-0.0903799	-3.39851	-3.23597	-2.86496
1	Nsylvestris_NODE_10124_length_2100_cov_147	IDN2_ARATH^IDN2_ARATH^Q:1826-2038,H:45-116^58.333%ID^E:6.68e-17^RecName: Full=Protein INVOLVED IN DE NOVO 2 {ECO:0000303|PubMed:19915591};^Eukaryota; Viridiplantae; Streptophyta; Embryophyta; Tracheophyta; Spermatophyta; Magnoliopsida; eudicotyledons; Gunneridae; Pentapetalae; rosids; malvids; Brassicales; Brassicaceae; Camelineae; Arabidopsis`IDN2_ARATH^IDN2_ARATH^Q:815-1033,H:27-99^50.685%ID^E:…	0.401662	1.08528	-0.467831	0.391524	0.671752	0.547591	2.07391	1.39112	0.987164	1.47359	1.58615	1.42292	1.62855	1.07518	-4.75619	-4.75619	-4.75619
1	Nsylvestris_NODE_10126_length_2100_cov_77	Y6344_ARATH^Y6344_ARATH^Q:732-253,H:73-232^87.5%ID^E:4.3e-95^RecName: Full=UPF0235 protein At5g63440;^Eukaryota; Viridiplantae; Streptophyta; Embryophyta; Tracheophyta; Spermatophyta; Magnoliopsida; eudicotyledons; Gunneridae; Pentapetalae; rosids; malvids; Brassicales; Brassicaceae; Camelineae; Arabidopsis`Y6344_ARATH^Y6344_ARATH^Q:1439-1296,H:30-77^60.417%ID^E:5.12e-09^RecName: Full=UPF0235 pro…	-0.208255	0.393046	0.099469	-0.703992	0.652137	0.89275	1.6781	1.89275	-0.565958	-0.0984376	-0.31594	0.280123	0.43669	-0.493173	-0.721106	-1.00685	-2.21136
1	Nsylvestris_NODE_10127_length_2100_cov_56	.	1.11172	1.00868	0.626293	-0.695635	-0.88828	0.552292	1.25856	0.713076	1.51382	1.43324	1.0048	1.73632	0.948221	0.763796	-3.69564	-3.69564	-3.69564
1	Nsylvestris_NODE_10129_length_2099_cov_171	SCP45_ARATH^SCP45_ARATH^Q:1871-564,H:28-461^78.211%ID^E:0^RecName: Full=Serine carboxypeptidase-like 45;^Eukaryota; Viridiplantae; Streptophyta; Embryophyta; Tracheophyta; Spermatophyta; Magnoliopsida; eudicotyledons; Gunneridae; Pentapetalae; rosids; malvids; Brassicales; Brassicaceae; Camelineae; Arabidopsis	-0.507817	0.676607	-0.507817	-1.38229	0.676607	2.747	2.99854	3.15169	-1.38229	0.840106	-0.0603582	0.202676	0.491527	-0.382286	-1.94933	-1.64532	-3.96725
1	Nsylvestris_NODE_10130_length_2099_cov_152	CDC2A_ANTMA^CDC2A_ANTMA^Q:1862-1209,H:1-218^97.706%ID^E:1.7e-150^RecName: Full=Cell division control protein 2 homolog A;^Eukaryota; Viridiplantae; Streptophyta; Embryophyta; Tracheophyta; Spermatophyta; Magnoliopsida; eudicotyledons; Gunneridae; Pentapetalae; asterids; lamiids; Lamiales; Plantaginaceae; Antirrhineae; Antirrhinum`CDC2A_ANTMA^CDC2A_ANTMA^Q:689-444,H:213-294^84.146%ID^E:7.62e-42^Re…	-0.130578	0.814337	0.039326	-0.0037709	0.51616	1.34856	1.9434	1.47988	0.235171	0.625557	-0.101658	-0.268567	0.290797	-0.271292	-1.76875	-2.7732	-1.97538
1	Nsylvestris_NODE_10132_length_2099_cov_47	POLR1_ARATH^POLR1_ARATH^Q:2-223,H:1335-1405^50%ID^E:8.96e-14^RecName: Full=Retrovirus-related Pol polyprotein from transposon RE1;^Eukaryota; Viridiplantae; Streptophyta; Embryophyta; Tracheophyta; Spermatophyta; Magnoliopsida; eudicotyledons; Gunneridae; Pentapetalae; rosids; malvids; Brassicales; Brassicaceae; Camelineae; Arabidopsis`POLR1_ARATH^POLR1_ARATH^Q:213-308,H:1431-1462^37.5%ID^E:8.96e…	1.17348	1.77948	0.8674	0.111514	0.678042	1.79741	2.55544	1.4242	0.514728	0.702267	1.29055	0.214254	0.922326	-0.234766	-5.29005	-5.29005	-3.21623
1	Nsylvestris_NODE_10135_length_2098_cov_204	QRT3_ARATH^QRT3_ARATH^Q:467-1810,H:37-480^66%ID^E:0^RecName: Full=Polygalacturonase QRT3;^Eukaryota; Viridiplantae; Streptophyta; Embryophyta; Tracheophyta; Spermatophyta; Magnoliopsida; eudicotyledons; Gunneridae; Pentapetalae; rosids; malvids; Brassicales; Brassicaceae; Camelineae; Arabidopsis	1.28941	1.48205	0.235216	-0.34183	0.872597	1.16521	1.65869	-0.0755381	0.756676	0.807236	0.894179	0.346759	1.50285	1.31118	-4.15021	-4.15021	-3.60425
1	Nsylvestris_NODE_10136_length_2098_cov_157	UTR5B_ARATH^UTR5B_ARATH^Q:1478-564,H:36-331^77.377%ID^E:3.04e-175^RecName: Full=UDP-galactose/UDP-glucose transporter 5B {ECO:0000305};^Eukaryota; Viridiplantae; Streptophyta; Embryophyta; Tracheophyta; Spermatophyta; Magnoliopsida; eudicotyledons; Gunneridae; Pentapetalae; rosids; malvids; Brassicales; Brassicaceae; Camelineae; Arabidopsis	0.913491	1.15362	1.45709	-0.411839	0.235859	0.886045	2.13132	2.02538	1.06506	0.0647945	0.894577	0.152268	1.11564	0.298278	-3.15048	-3.95533	-4.87579
1	Nsylvestris_NODE_10137_length_2098_cov_131	.	0.433747	0.433747	-1.08982	-0.566253	-0.504853	-0.0023526	0.954579	0.58261	0.665072	1.17697	1.35313	0.464773	1.17697	0.997647	-2.28246	-2.28866	-1.50485
1	Nsylvestris_NODE_1014_length_4928_cov_224	VATA_DAUCA^VATA_DAUCA^Q:2308-440,H:1-623^96.469%ID^E:0^RecName: Full=V-type proton ATPase catalytic subunit A;^Eukaryota; Viridiplantae; Streptophyta; Embryophyta; Tracheophyta; Spermatophyta; Magnoliopsida; eudicotyledons; Gunneridae; Pentapetalae; asterids; campanulids; Apiales; Apiaceae; Apioideae; Scandiceae; Daucinae; Daucus; Daucus sect. Daucus	0.494679	1.22328	0.319049	0.290753	0.87828	1.47794	2.11775	1.1452	1.14622	0.980747	0.820765	1.12201	1.04374	0.669486	-4.44286	-5.27747	-4.00958
1	Nsylvestris_NODE_10140_length_2097_cov_177	FBL45_ARATH^FBL45_ARATH^Q:2097-787,H:28-424^29.464%ID^E:1.87e-32^RecName: Full=Putative F-box/LRR-repeat protein At3g18150;^Eukaryota; Viridiplantae; Streptophyta; Embryophyta; Tracheophyta; Spermatophyta; Magnoliopsida; eudicotyledons; Gunneridae; Pentapetalae; rosids; malvids; Brassicales; Brassicaceae; Camelineae; Arabidopsis	0.921875	2.22144	0.994025	1.39136	1.745	0.443828	1.65795	1.06274	0.884401	0.806398	0.590669	1.19106	0.221436	-1.0416	-4.36353	-4.36353	-4.36353
1	Nsylvestris_NODE_10141_length_2097_cov_167	TMN3_ARATH^TMN3_ARATH^Q:1928-192,H:14-592^85.838%ID^E:0^RecName: Full=Transmembrane 9 superfamily member 3 {ECO:0000305};^Eukaryota; Viridiplantae; Streptophyta; Embryophyta; Tracheophyta; Spermatophyta; Magnoliopsida; eudicotyledons; Gunneridae; Pentapetalae; rosids; malvids; Brassicales; Brassicaceae; Camelineae; Arabidopsis	-0.289341	1.11993	-0.309412	0.481596	1.02569	0.577762	2.43336	0.906082	0.307494	0.397848	-2.10169	1.0083	1.00413	0.312181	-1.59809	-3.44365	-1.8322
1	Nsylvestris_NODE_10142_length_2097_cov_79	IDD9_ARATH^IDD9_ARATH^Q:491-1729,H:39-412^53.066%ID^E:8.87e-106^RecName: Full=Zinc finger protein BALDIBIS {ECO:0000303|PubMed:25829440};^Eukaryota; Viridiplantae; Streptophyta; Embryophyta; Tracheophyta; Spermatophyta; Magnoliopsida; eudicotyledons; Gunneridae; Pentapetalae; rosids; malvids; Brassicales; Brassicaceae; Camelineae; Arabidopsis	0.00825816	1.14655	1.42164	0.364402	0.950566	1.63119	2.30692	2.13259	1.47293	0.493685	-0.0506355	0.950266	0.757063	0.321388	-4.6356	-4.6356	-4.6356
1	Nsylvestris_NODE_10143_length_2097_cov_65	GH310_ARATH^GH310_ARATH^Q:1867-110,H:10-590^68.707%ID^E:0^RecName: Full=Indole-3-acetic acid-amido synthetase GH3.10 {ECO:0000305};^Eukaryota; Viridiplantae; Streptophyta; Embryophyta; Tracheophyta; Spermatophyta; Magnoliopsida; eudicotyledons; Gunneridae; Pentapetalae; rosids; malvids; Brassicales; Brassicaceae; Camelineae; Arabidopsis	2.07149	1.29244	0.416582	0.329119	0.643816	-0.448488	0.852681	1.67489	0.667544	0.261118	0.886366	0.80009	1.70636	-0.443858	-3.29607	-4.25584	-3.15823
1	Nsylvestris_NODE_10146_length_2096_cov_86	SRO5_ARATH^SRO5_ARATH^Q:837-1652,H:41-306^45.455%ID^E:2.99e-73^RecName: Full=Probable inactive poly [ADP-ribose] polymerase SRO5;^Eukaryota; Viridiplantae; Streptophyta; Embryophyta; Tracheophyta; Spermatophyta; Magnoliopsida; eudicotyledons; Gunneridae; Pentapetalae; rosids; malvids; Brassicales; Brassicaceae; Camelineae; Arabidopsis	-0.334601	0.525221	1.8174	0.336776	1.06026	0.717866	1.96525	0.932879	0.360733	0.3911	-0.5653	0.233161	0.613723	0.307972	-3.3802	-1.54352	-3.43872
1	Nsylvestris_NODE_10147_length_2096_cov_70	BSK5_ARATH^BSK5_ARATH^Q:1755-277,H:1-489^75.254%ID^E:0^RecName: Full=Serine/threonine-protein kinase BSK5 {ECO:0000305};^Eukaryota; Viridiplantae; Streptophyta; Embryophyta; Tracheophyta; Spermatophyta; Magnoliopsida; eudicotyledons; Gunneridae; Pentapetalae; rosids; malvids; Brassicales; Brassicaceae; Camelineae; Arabidopsis	0.919137	0.352068	1.33979	-0.987191	0.751039	1.32797	2.10374	1.66127	1.35512	1.66037	-0.441185	2.82888	0.737489	-0.570046	-4.34615	-4.34615	-4.34615
1	Nsylvestris_NODE_10148_length_2096_cov_43	BAT1_ORYSJ^BAT1_ORYSJ^Q:858-2012,H:19-404^73.575%ID^E:1.98e-177^RecName: Full=Amino-acid permease BAT1 homolog;^Eukaryota; Viridiplantae; Streptophyta; Embryophyta; Tracheophyta; Spermatophyta; Magnoliopsida; Liliopsida; Poales; Poaceae; BOP clade; Oryzoideae; Oryzeae; Oryzinae; Oryza; Oryza sativa	-0.17118	-0.756143	-0.17118	1.41378	-0.17118	2.56579	3.19619	2.41378	0.243857	-0.756143	-0.270716	-0.756143	-0.756143	-1.75614	-0.756143	-1.75614	-1.75614
1	Nsylvestris_NODE_10149_length_2095_cov_232	SCAB2_ARATH^SCAB2_ARATH^Q:1799-333,H:1-492^61.538%ID^E:0^RecName: Full=Stomatal closure-related actin-binding protein 2 {ECO:0000303|PubMed:21719691};^Eukaryota; Viridiplantae; Streptophyta; Embryophyta; Tracheophyta; Spermatophyta; Magnoliopsida; eudicotyledons; Gunneridae; Pentapetalae; rosids; malvids; Brassicales; Brassicaceae; Camelineae; Arabidopsis	-0.0614746	1.28863	1.19537	0.394852	0.873115	2.03208	2.62216	2.10293	0.63651	0.531823	-0.00394345	0.57903	0.708252	-0.0124837	-4.04908	-4.5012	-4.33656
1	Nsylvestris_NODE_10150_length_2095_cov_150	ENO3_ARATH^ENO3_ARATH^Q:1034-393,H:259-472^81.776%ID^E:2.33e-123^RecName: Full=Cytosolic enolase 3;^Eukaryota; Viridiplantae; Streptophyta; Embryophyta; Tracheophyta; Spermatophyta; Magnoliopsida; eudicotyledons; Gunneridae; Pentapetalae; rosids; malvids; Brassicales; Brassicaceae; Camelineae; Arabidopsis	0.877995	0.971322	0.493152	0.377278	0.908474	1.8723	2.67841	1.43591	1.03483	0.938155	0.354611	0.710244	1.52291	0.73972	-5.01332	-5.95594	-3.94605
1	Nsylvestris_NODE_10153_length_2095_cov_56	NAT7_ARATH^NAT7_ARATH^Q:279-1847,H:16-538^62.141%ID^E:0^RecName: Full=Nucleobase-ascorbate transporter 7;^Eukaryota; Viridiplantae; Streptophyta; Embryophyta; Tracheophyta; Spermatophyta; Magnoliopsida; eudicotyledons; Gunneridae; Pentapetalae; rosids; malvids; Brassicales; Brassicaceae; Camelineae; Arabidopsis	-0.348718	-0.57111	-1.41911	-0.348718	1.01385	1.36749	2.38825	1.50689	0.303359	-0.0405955	-0.57111	-0.493108	0.651282	-0.348718	-0.653572	-1.15607	-1.28029
1	Nsylvestris_NODE_10155_length_2092_cov_12	.	1.90468	-0.474946	1.01048	-1.17863	-1.21191	0.30914	1.4118	0.889067	0.955875	1.32497	1.4744	1.11002	0.662558	0.203126	-2.79687	-2.79687	-2.79687
1	Nsylvestris_NODE_10156_length_2094_cov_131	P2C60_ARATH^P2C60_ARATH^Q:1411-1638,H:256-332^85.714%ID^E:1.37e-36^RecName: Full=Probable protein phosphatase 2C 60;^Eukaryota; Viridiplantae; Streptophyta; Embryophyta; Tracheophyta; Spermatophyta; Magnoliopsida; eudicotyledons; Gunneridae; Pentapetalae; rosids; malvids; Brassicales; Brassicaceae; Camelineae; Arabidopsis	0.330441	0.347734	0.049369	-0.794548	0.153805	0.441935	1.74831	0.795663	1.11926	0.979787	1.29702	0.577324	1.27688	0.393453	-2.56487	-2.71332	-3.43824
1	Nsylvestris_NODE_1016_length_4927_cov_143	UGT43_PUEML^UGT43_PUEML^Q:4769-3420,H:6-447^52.308%ID^E:7.01e-154^RecName: Full=UDP-glycosyltransferase 43 {ECO:0000303|PubMed:27066037};^Eukaryota; Viridiplantae; Streptophyta; Embryophyta; Tracheophyta; Spermatophyta; Magnoliopsida; eudicotyledons; Gunneridae; Pentapetalae; rosids; fabids; Fabales; Fabaceae; Papilionoideae; 50 kb inversion clade; NPAAA clade; indigoferoid/millettioid clade; Pha…	-0.210279	0.27551	-0.58079	-0.888153	-0.293176	1.48511	2.00439	1.28828	0.210478	0.376189	0.373103	0.605724	0.744098	0.254183	-2.27094	-1.52161	-1.85211
1	Nsylvestris_NODE_10160_length_2093_cov_190	ACR8_ARATH^ACR8_ARATH^Q:1693-368,H:1-441^66.368%ID^E:0^RecName: Full=ACT domain-containing protein ACR8 {ECO:0000305};^Eukaryota; Viridiplantae; Streptophyta; Embryophyta; Tracheophyta; Spermatophyta; Magnoliopsida; eudicotyledons; Gunneridae; Pentapetalae; rosids; malvids; Brassicales; Brassicaceae; Camelineae; Arabidopsis	-0.217507	-0.121603	0.599501	-0.176518	-0.0496708	1.00907	2.15081	0.84206	0.135931	0.37224	-0.432187	0.595322	0.919796	-0.0172445	-1.72224	-2.45936	-1.4284
1	Nsylvestris_NODE_10161_length_2093_cov_186	IP21_TOBAC^IP21_TOBAC^Q:249-839,H:1-197^99.492%ID^E:2.88e-107^RecName: Full=Proteinase inhibitor type-2;^Eukaryota; Viridiplantae; Streptophyta; Embryophyta; Tracheophyta; Spermatophyta; Magnoliopsida; eudicotyledons; Gunneridae; Pentapetalae; asterids; lamiids; Solanales; Solanaceae; Nicotianoideae; Nicotianeae; Nicotiana	0.423075	0.523695	0.0676675	-0.456833	0.305508	1.42742	2.30861	1.50542	0.359091	0.187562	0.4305	0.571489	0.862617	0.218566	-2.35131	-3.4992	-2.88386
1	Nsylvestris_NODE_10163_length_2093_cov_116	TFB1A_ARATH^TFB1A_ARATH^Q:79-201,H:263-303^73.171%ID^E:5.1e-44^RecName: Full=General transcription and DNA repair factor IIH subunit TFB1-1;^Eukaryota; Viridiplantae; Streptophyta; Embryophyta; Tracheophyta; Spermatophyta; Magnoliopsida; eudicotyledons; Gunneridae; Pentapetalae; rosids; malvids; Brassicales; Brassicaceae; Camelineae; Arabidopsis`TFB1A_ARATH^TFB1A_ARATH^Q:515-907,H:407-535^37.143%…	1.42925	1.40579	-0.277017	-0.132627	0.333037	1.11891	2.04491	0.90132	1.3577	1.38195	1.33304	1.45234	0.796984	0.429252	-4.52494	-4.52494	-4.52494
1	Nsylvestris_NODE_10164_length_2093_cov_59	.	1.06051	1.32594	-0.415878	0.201676	1.24559	1.46842	1.97504	1.27255	0.998892	0.896073	0.039222	0.938293	1.70457	0.186265	-5.17023	-3.5567	-4.17023
1	Nsylvestris_NODE_10165_length_2093_cov_51	.	1.01556	0.530135	-0.206831	0.0826761	0.323684	1.57744	1.4306	1.2671	0.430599	0.623244	0.430599	0.323684	1.4306	0.871172	-3.37676	-3.37676	-3.37676
1	Nsylvestris_NODE_10168_length_2092_cov_208	ACAP1_ARATH^ACAP1_ARATH^Q:1827-409,H:1-476^68.191%ID^E:0^RecName: Full=Cyclase-associated protein 1;^Eukaryota; Viridiplantae; Streptophyta; Embryophyta; Tracheophyta; Spermatophyta; Magnoliopsida; eudicotyledons; Gunneridae; Pentapetalae; rosids; malvids; Brassicales; Brassicaceae; Camelineae; Arabidopsis	0.838993	1.13763	0.48112	0.301802	1.14965	1.20278	2.42871	1.60968	0.334662	0.527629	0.346266	0.45353	1.84652	0.377813	-4.46309	-5.19384	-3.37985
1	Nsylvestris_NODE_10170_length_2092_cov_197	METL6_RAT^METL6_RAT^Q:3-671,H:42-267^47.577%ID^E:1.23e-61^RecName: Full=tRNA N(3)-methylcytidine methyltransferase METTL6 {ECO:0000305};^Eukaryota; Metazoa; Chordata; Craniata; Vertebrata; Euteleostomi; Mammalia; Eutheria; Euarchontoglires; Glires; Rodentia; Myomorpha; Muroidea; Muridae; Murinae; Rattus	0.783292	1.24021	-0.359909	-0.710861	0.242257	1.41033	2.14112	1.05024	1.01397	1.26948	0.781683	1.15768	1.38394	0.862357	-3.63641	-3.94709	-4.68228
1	Nsylvestris_NODE_10171_length_2092_cov_185	C3H62_ORYSJ^C3H62_ORYSJ^Q:550-1152,H:141-350^50.237%ID^E:6.38e-48^RecName: Full=Zinc finger CCCH domain-containing protein 62;^Eukaryota; Viridiplantae; Streptophyta; Embryophyta; Tracheophyta; Spermatophyta; Magnoliopsida; Liliopsida; Poales; Poaceae; BOP clade; Oryzoideae; Oryzeae; Oryzinae; Oryza; Oryza sativa	0.534359	0.536342	0.175719	-0.107607	-0.254859	1.10309	2.04141	1.10961	0.725006	0.376859	0.6088	0.332444	0.77802	0.465395	-3.82982	-2.4098	-2.18496
1	Nsylvestris_NODE_10172_length_2092_cov_125	PSS1_ARATH^PSS1_ARATH^Q:1653-379,H:1-424^80.751%ID^E:0^RecName: Full=CDP-diacylglycerol--serine O-phosphatidyltransferase 1;^Eukaryota; Viridiplantae; Streptophyta; Embryophyta; Tracheophyta; Spermatophyta; Magnoliopsida; eudicotyledons; Gunneridae; Pentapetalae; rosids; malvids; Brassicales; Brassicaceae; Camelineae; Arabidopsis	1.11457	1.59427	-0.833013	-0.469717	0.395344	0.931214	1.98837	1.25756	0.577031	1.12184	1.10862	1.26109	1.729	1.14939	-4.27555	-4.628	-4.02202
1	Nsylvestris_NODE_10173_length_2092_cov_55	.	1.02094	1.04693	-0.0599828	0.0469324	0.193774	1.3481	1.94002	0.665842	1.28397	1.04693	0.941958	1.70474	1.36968	0.731431	-4.76042	-3.76042	-4.76042
1	Nsylvestris_NODE_10174_length_2092_cov_23	ACA12_ARATH^ACA12_ARATH^Q:1255-149,H:636-1005^76.486%ID^E:0^RecName: Full=Calcium-transporting ATPase 12, plasma membrane-type;^Eukaryota; Viridiplantae; Streptophyta; Embryophyta; Tracheophyta; Spermatophyta; Magnoliopsida; eudicotyledons; Gunneridae; Pentapetalae; rosids; malvids; Brassicales; Brassicaceae; Camelineae; Arabidopsis`ACA12_ARATH^ACA12_ARATH^Q:2087-1614,H:125-282^70.253%ID^E:3.29e-…	1.11744	1.62838	-0.137155	-0.137155	-0.137155	0.710842	2.05125	1.24136	0.12588	0.862845	-0.134272	0.348272	0.710842	-0.87412	-2.45908	-2.45908	-2.45908
1	Nsylvestris_NODE_10177_length_2091_cov_176	BRTL3_ARATH^BRTL3_ARATH^Q:731-1705,H:97-425^75.076%ID^E:4.64e-164^RecName: Full=Probable mitochondrial adenine nucleotide transporter BTL3;^Eukaryota; Viridiplantae; Streptophyta; Embryophyta; Tracheophyta; Spermatophyta; Magnoliopsida; eudicotyledons; Gunneridae; Pentapetalae; rosids; malvids; Brassicales; Brassicaceae; Camelineae; Arabidopsis	0.54747	0.651082	-0.243843	-0.154181	0.354001	1.39752	2.07834	1.04406	0.744735	0.660177	0.552133	0.819653	0.787742	0.735502	-3.19836	-3.41227	-3.36375
1	Nsylvestris_NODE_10179_length_2091_cov_128	TB22B_MACFA^TB22B_MACFA^Q:860-1699,H:225-502^50.534%ID^E:2.45e-89^RecName: Full=TBC1 domain family member 22B;^Eukaryota; Metazoa; Chordata; Craniata; Vertebrata; Euteleostomi; Mammalia; Eutheria; Euarchontoglires; Primates; Haplorrhini; Catarrhini; Cercopithecidae; Cercopithecinae; Macaca	0.489393	0.699721	0.442546	-0.116339	-0.000893808	0.791781	1.75861	1.43752	0.712941	0.971003	1.18235	0.535029	0.418964	0.321489	-2.33996	-3.52143	-3.78273
1	Nsylvestris_NODE_10180_length_2091_cov_60	AP21_ORYSI^AP21_ORYSI^Q:924-1664,H:171-441^60.727%ID^E:2.19e-84^RecName: Full=APETALA2-like protein 1 {ECO:0000305};^Eukaryota; Viridiplantae; Streptophyta; Embryophyta; Tracheophyta; Spermatophyta; Magnoliopsida; Liliopsida; Poales; Poaceae; BOP clade; Oryzoideae; Oryzeae; Oryzinae; Oryza; Oryza sativa	0.585272	0.0060006	0.517826	1.28137	1.02528	0.535641	2.13885	1.9831	0.556475	0.013554	-0.752263	1.00742	1.93419	0.938661	-3.92379	-3.92379	-3.92379
1	Nsylvestris_NODE_10181_length_2091_cov_42	ALMTC_ARATH^ALMTC_ARATH^Q:150-1661,H:10-538^64.037%ID^E:0^RecName: Full=Aluminum-activated malate transporter 12;^Eukaryota; Viridiplantae; Streptophyta; Embryophyta; Tracheophyta; Spermatophyta; Magnoliopsida; eudicotyledons; Gunneridae; Pentapetalae; rosids; malvids; Brassicales; Brassicaceae; Camelineae; Arabidopsis	1.67344	1.3062	0.994385	0.0304489	-1.1622	-0.969551	1.07484	0.88843	1.47935	2.07899	1.97062	0.959767	0.695501	0.88843	-3.96955	-3.96955	-3.96955
1	Nsylvestris_NODE_10182_length_2090_cov_228	U2A2B_ARATH^U2A2B_ARATH^Q:1584-367,H:190-579^65.848%ID^E:0^RecName: Full=Splicing factor U2af large subunit B {ECO:0000303|PubMed:24580679};^Eukaryota; Viridiplantae; Streptophyta; Embryophyta; Tracheophyta; Spermatophyta; Magnoliopsida; eudicotyledons; Gunneridae; Pentapetalae; rosids; malvids; Brassicales; Brassicaceae; Camelineae; Arabidopsis	0.179225	0.102907	-0.518435	-0.535086	-0.123466	0.620615	1.62352	0.765266	0.434574	0.095312	0.130687	-0.244911	0.920218	0.255997	-1.66781	-0.709745	-1.32886
1	Nsylvestris_NODE_10183_length_2090_cov_214	ASP63_ARATH^ASP63_ARATH^Q:417-1688,H:62-498^60.85%ID^E:1.28e-155^RecName: Full=Probable aspartyl protease At4g16563 {ECO:0000305};^Eukaryota; Viridiplantae; Streptophyta; Embryophyta; Tracheophyta; Spermatophyta; Magnoliopsida; eudicotyledons; Gunneridae; Pentapetalae; rosids; malvids; Brassicales; Brassicaceae; Camelineae; Arabidopsis	2.45897	1.10314	0.156064	-0.765081	1.29892	-1.71847	-0.406193	0.388548	2.24118	0.596299	0.598785	1.1501	3.05422	0.486583	-6.23304	-0.24802	-4.162
1	Nsylvestris_NODE_10184_length_2090_cov_174	ABIL2_ARATH^ABIL2_ARATH^Q:622-1521,H:6-295^45.545%ID^E:1.74e-62^RecName: Full=Protein ABIL2;^Eukaryota; Viridiplantae; Streptophyta; Embryophyta; Tracheophyta; Spermatophyta; Magnoliopsida; eudicotyledons; Gunneridae; Pentapetalae; rosids; malvids; Brassicales; Brassicaceae; Camelineae; Arabidopsis	0.342599	1.15739	1.15655	-0.930917	0.32055	2.03871	2.75091	2.87721	0.870932	-0.929715	0.935991	-0.813222	-0.345153	1.11581	-3.51588	-3.51588	-3.51588
1	Nsylvestris_NODE_10185_length_2090_cov_115	MED21_ARATH^MED21_ARATH^Q:1101-1514,H:1-139^77.698%ID^E:6.98e-57^RecName: Full=Mediator of RNA polymerase II transcription subunit 21;^Eukaryota; Viridiplantae; Streptophyta; Embryophyta; Tracheophyta; Spermatophyta; Magnoliopsida; eudicotyledons; Gunneridae; Pentapetalae; rosids; malvids; Brassicales; Brassicaceae; Camelineae; Arabidopsis	0.0589607	0.898155	0.922659	-0.634734	0.357609	1.10708	1.66945	1.48958	0.722581	1.21041	0.786452	0.953696	0.656318	0.663111	-3.98329	-3.45114	-3.4269
1	Nsylvestris_NODE_10187_length_2090_cov_110	QQT1_ARATH^QQT1_ARATH^Q:936-334,H:98-298^79.104%ID^E:2.82e-91^RecName: Full=GPN-loop GTPase QQT1 {ECO:0000305};^Eukaryota; Viridiplantae; Streptophyta; Embryophyta; Tracheophyta; Spermatophyta; Magnoliopsida; eudicotyledons; Gunneridae; Pentapetalae; rosids; malvids; Brassicales; Brassicaceae; Camelineae; Arabidopsis`QQT1_ARATH^QQT1_ARATH^Q:2089-1829,H:14-100^86.207%ID^E:3.97e-44^RecName: Full=GP…	0.600386	1.09096	0.433387	-0.462325	-0.872967	0.902014	1.8996	1.42312	0.153637	0.560796	0.950088	0.776949	-0.920204	-0.771298	-1.59146	-1.96794	-2.20474
1	Nsylvestris_NODE_10190_length_2089_cov_224	PME_PETIN^PME_PETIN^Q:1360-218,H:1-374^69.634%ID^E:0^RecName: Full=Pectinesterase;^Eukaryota; Viridiplantae; Streptophyta; Embryophyta; Tracheophyta; Spermatophyta; Magnoliopsida; eudicotyledons; Gunneridae; Pentapetalae; asterids; lamiids; Solanales; Solanaceae; Petunioideae; Petunia	1.67525	-0.653309	2.45641	-0.454953	1.66133	-3.50323	-5.45333	0.58005	1.1087	0.593555	3.46303	-1.52543	5.46279	0.888941	-1.46801	-3.1459	-1.68589
1	Nsylvestris_NODE_10191_length_2089_cov_223	PMK_ARATH^PMK_ARATH^Q:247-1773,H:1-505^71.316%ID^E:0^RecName: Full=Phosphomevalonate kinase, peroxisomal {ECO:0000305};^Eukaryota; Viridiplantae; Streptophyta; Embryophyta; Tracheophyta; Spermatophyta; Magnoliopsida; eudicotyledons; Gunneridae; Pentapetalae; rosids; malvids; Brassicales; Brassicaceae; Camelineae; Arabidopsis	0.836257	1.48611	0.527107	0.143773	0.835217	1.49554	2.47464	1.64591	0.98512	0.715465	0.914916	0.845369	0.889293	0.608326	-5.17374	-4.05203	-5.17727
1	Nsylvestris_NODE_10195_length_2089_cov_112	ARG7_VIGRR^ARG7_VIGRR^Q:262-444,H:24-85^56.452%ID^E:2.89e-15^RecName: Full=Indole-3-acetic acid-induced protein ARG7;^Eukaryota; Viridiplantae; Streptophyta; Embryophyta; Tracheophyta; Spermatophyta; Magnoliopsida; eudicotyledons; Gunneridae; Pentapetalae; rosids; fabids; Fabales; Fabaceae; Papilionoideae; 50 kb inversion clade; NPAAA clade; indigoferoid/millettioid clade; Phaseoleae; Vigna	0.811083	0.864587	0.675445	0.654158	1.30538	-0.543288	1.72313	0.847733	-0.274518	-0.486224	-1.47359	0.0229837	1.04174	0.122997	-1.51196	-2.71867	-1.06098
1	Nsylvestris_NODE_102_length_8418_cov_231	.	0.190456	0.367779	-0.329426	-0.68653	-0.0354112	0.401877	1.48807	0.054707	0.696305	0.477012	0.576348	0.673917	1.08208	0.18626	-1.60096	-1.84735	-1.69513
1	Nsylvestris_NODE_1020_length_4922_cov_128	ELF6_ARATH^ELF6_ARATH^Q:4490-2607,H:1-615^63.158%ID^E:0^RecName: Full=Probable lysine-specific demethylase ELF6;^Eukaryota; Viridiplantae; Streptophyta; Embryophyta; Tracheophyta; Spermatophyta; Magnoliopsida; eudicotyledons; Gunneridae; Pentapetalae; rosids; malvids; Brassicales; Brassicaceae; Camelineae; Arabidopsis`ELF6_ARATH^ELF6_ARATH^Q:791-246,H:1142-1339^56.061%ID^E:3.29e-56^RecName: Full=…	1.02554	1.41994	1.02347	0.463369	0.82596	1.45955	2.33489	1.54118	0.782627	0.937316	1.00014	0.939098	1.24806	0.684836	-5.039	-4.86812	-5.77885
1	Nsylvestris_NODE_10202_length_2087_cov_234	CDS1_SOLTU^CDS1_SOLTU^Q:1911-640,H:1-424^97.877%ID^E:0^RecName: Full=Phosphatidate cytidylyltransferase 1 {ECO:0000303|PubMed:9085581};^Eukaryota; Viridiplantae; Streptophyta; Embryophyta; Tracheophyta; Spermatophyta; Magnoliopsida; eudicotyledons; Gunneridae; Pentapetalae; asterids; lamiids; Solanales; Solanaceae; Solanoideae; Solaneae; Solanum	0.103818	0.437138	-0.310875	-0.698272	-0.181534	0.425059	1.1673	0.894464	0.38201	0.328754	0.24951	0.255804	0.329128	0.0153492	-1.03652	-1.26637	-1.09477
1	Nsylvestris_NODE_10206_length_2087_cov_189	SKI16_ARATH^SKI16_ARATH^Q:64-1365,H:10-436^61.187%ID^E:5.49e-177^RecName: Full=F-box protein SKIP16;^Eukaryota; Viridiplantae; Streptophyta; Embryophyta; Tracheophyta; Spermatophyta; Magnoliopsida; eudicotyledons; Gunneridae; Pentapetalae; rosids; malvids; Brassicales; Brassicaceae; Camelineae; Arabidopsis	1.01994	0.765382	0.30054	0.212914	1.03647	0.465545	1.42229	1.04063	0.681251	0.218758	0.255157	0.785315	1.25851	-0.163589	-2.95416	-2.98715	-3.35779
1	Nsylvestris_NODE_10207_length_2087_cov_165	PTR6_ARATH^PTR6_ARATH^Q:184-1857,H:11-574^49.027%ID^E:0^RecName: Full=Protein NRT1/ PTR FAMILY 1.2;^Eukaryota; Viridiplantae; Streptophyta; Embryophyta; Tracheophyta; Spermatophyta; Magnoliopsida; eudicotyledons; Gunneridae; Pentapetalae; rosids; malvids; Brassicales; Brassicaceae; Camelineae; Arabidopsis	0.475865	0.253472	-0.021824	-0.358081	0.281999	0.604284	1.45827	0.222073	0.133946	0.65414	-0.866869	0.692725	0.645433	-0.655227	-1.89508	-0.464342	-1.16078
1	Nsylvestris_NODE_10210_length_2087_cov_96	.	1.42882	1.09105	0.35511	0.627037	0.308285	1.64884	2.55066	-0.277158	0.786	0.541284	1.32406	1.03667	1.70067	0.675921	-4.59909	-4.59909	-4.59909
1	Nsylvestris_NODE_10212_length_2087_cov_61	.	0.986223	1.17462	0.621615	0.654281	0.770311	2.3908	3.31105	2.57269	0.876161	-0.565621	0.645883	0.122171	0.856019	-0.659148	-4.93788	-3.88129	-4.93788
1	Nsylvestris_NODE_10213_length_2087_cov_45	.	0.752534	1.18317	0.688404	-0.601103	1.03633	2.22897	2.58652	1.3989	-0.186066	0.688404	0.135863	0.5509	0.621289	0.228972	-3.77103	-3.77103	-3.77103
1	Nsylvestris_NODE_10214_length_2087_cov_22	.	-0.531518	0.583959	-0.794553	-0.138285	-0.794553	1.92791	2.35015	0.613616	0.69499	2.07492	1.20473	1.46125	1.22835	-0.531518	-3.11648	-3.11648	-3.11648
1	Nsylvestris_NODE_10215_length_2087_cov_15	.	-0.0137938	0.249481	0.753184	0.125153	0.665722	1.30958	1.61992	0.473076	1.50518	0.836448	0.57165	-0.132645	1.52817	0.511713	-3.33428	-3.33428	-3.33428
1	Nsylvestris_NODE_10216_length_2086_cov_224	ASOL_TOBAC^ASOL_TOBAC^Q:1958-285,H:1-554^82.437%ID^E:0^RecName: Full=L-ascorbate oxidase homolog;^Eukaryota; Viridiplantae; Streptophyta; Embryophyta; Tracheophyta; Spermatophyta; Magnoliopsida; eudicotyledons; Gunneridae; Pentapetalae; asterids; lamiids; Solanales; Solanaceae; Nicotianoideae; Nicotianeae; Nicotiana	2.98558	0.560599	3.03023	0.56599	3.09493	-1.49703	-4.48132	1.37359	-1.00537	0.706135	-0.576992	-3.09727	4.98142	-2.04658	0.23073	-4.60161	-0.223048
1	Nsylvestris_NODE_1022_length_4915_cov_77	POLR1_ARATH^POLR1_ARATH^Q:1117-722,H:619-751^39.098%ID^E:6.45e-53^RecName: Full=Retrovirus-related Pol polyprotein from transposon RE1;^Eukaryota; Viridiplantae; Streptophyta; Embryophyta; Tracheophyta; Spermatophyta; Magnoliopsida; eudicotyledons; Gunneridae; Pentapetalae; rosids; malvids; Brassicales; Brassicaceae; Camelineae; Arabidopsis`POLR1_ARATH^POLR1_ARATH^Q:2931-1711,H:25-418^21.616%ID^E…	-0.17927	0.875814	0.148986	-1.61739	-0.637216	1.68834	3.09443	0.983592	1.45802	1.02144	1.90664	1.12672	1.32789	-0.313474	-3.62817	-3.62817	-3.62817
1	Nsylvestris_NODE_10222_length_2086_cov_92	GGLO3_ARATH^GGLO3_ARATH^Q:237-1895,H:24-577^66.547%ID^E:0^RecName: Full=L-gulonolactone oxidase 3 {ECO:0000303|PubMed:20622436};^Eukaryota; Viridiplantae; Streptophyta; Embryophyta; Tracheophyta; Spermatophyta; Magnoliopsida; eudicotyledons; Gunneridae; Pentapetalae; rosids; malvids; Brassicales; Brassicaceae; Camelineae; Arabidopsis	1.3383	1.31576	-0.433717	0.194033	0.857735	1.00778	1.704	1.1414	1.24548	1.18335	0.815376	0.92084	1.32717	0.028568	-4.24405	-4.86304	-3.53898
1	Nsylvestris_NODE_10223_length_2086_cov_80	PTST2_ARATH^PTST2_ARATH^Q:158-910,H:283-532^54.086%ID^E:7.75e-65^RecName: Full=Protein PTST homolog 2, chloroplastic {ECO:0000305};^Eukaryota; Viridiplantae; Streptophyta; Embryophyta; Tracheophyta; Spermatophyta; Magnoliopsida; eudicotyledons; Gunneridae; Pentapetalae; rosids; malvids; Brassicales; Brassicaceae; Camelineae; Arabidopsis`PTST2_ARATH^PTST2_ARATH^Q:1929-1177,H:283-532^54.086%ID^E:7.…	0.431982	0.0632962	0.366432	-0.221973	0.670714	1.38522	1.37927	1.20465	-0.035482	1.14976	0.137721	1.02786	-0.354573	0.901833	-2.70224	-2.70224	-2.70224
1	Nsylvestris_NODE_10226_length_2085_cov_200	RECAC_ARATH^RECAC_ARATH^Q:269-1396,H:39-407^83.465%ID^E:0^RecName: Full=DNA repair protein recA homolog 1, chloroplastic;^Eukaryota; Viridiplantae; Streptophyta; Embryophyta; Tracheophyta; Spermatophyta; Magnoliopsida; eudicotyledons; Gunneridae; Pentapetalae; rosids; malvids; Brassicales; Brassicaceae; Camelineae; Arabidopsis	-0.0643087	0.340407	-0.417039	-0.610843	0.0995033	1.40977	1.88117	1.5448	0.734965	0.512818	0.409338	0.658034	0.576768	-0.100141	-2.57054	-2.0757	-2.32901
1	Nsylvestris_NODE_10227_length_2085_cov_108	LIG6_ARATH^LIG6_ARATH^Q:289-2076,H:60-608^53.344%ID^E:0^RecName: Full=DNA ligase 6 {ECO:0000303|PubMed:20584150};^Eukaryota; Viridiplantae; Streptophyta; Embryophyta; Tracheophyta; Spermatophyta; Magnoliopsida; eudicotyledons; Gunneridae; Pentapetalae; rosids; malvids; Brassicales; Brassicaceae; Camelineae; Arabidopsis	0.89708	1.17911	-0.551307	-0.181392	0.748163	1.2945	2.56203	0.584274	1.12634	0.826391	1.56535	1.12994	1.36795	0.831925	-4.46012	-4.46012	-4.46012
1	Nsylvestris_NODE_10228_length_2085_cov_100	.	0.394188	0.934897	0.318703	-0.433885	1.5048	0.056678	1.0384	0.702868	1.70446	1.73632	0.826416	1.73142	1.28521	-0.41352	-4.45201	-2.274	-4.66095
1	Nsylvestris_NODE_10229_length_2085_cov_48	.	1.48178	1.00173	0.158017	0.402919	0.437298	0.3735	1.13058	0.494772	-0.0541303	0.226019	-0.843205	0.357099	0.85667	-0.458125	-1.14013	-2.80222	-1.62256
1	Nsylvestris_NODE_10230_length_2085_cov_17	PP231_ARATH^PP231_ARATH^Q:56-1432,H:199-653^54.466%ID^E:0^RecName: Full=Pentatricopeptide repeat-containing protein At3g14730;^Eukaryota; Viridiplantae; Streptophyta; Embryophyta; Tracheophyta; Spermatophyta; Magnoliopsida; eudicotyledons; Gunneridae; Pentapetalae; rosids; malvids; Brassicales; Brassicaceae; Camelineae; Arabidopsis`PP231_ARATH^PP231_ARATH^Q:56-1138,H:100-452^26.486%ID^E:1.02e-29^…	-0.0198879	1.29915	-2.01989	-1.01989	1.2341	2.15004	2.62397	0.565075	-1.01989	0.30204	-0.434925	1.43954	-2.01989	-0.0198879	-0.0198879	-2.01989	-1.01989
1	Nsylvestris_NODE_10231_length_2084_cov_210	P2C40_ARATH^P2C40_ARATH^Q:1772-261,H:2-493^58.984%ID^E:2.11e-165^RecName: Full=Probable protein phosphatase 2C 40;^Eukaryota; Viridiplantae; Streptophyta; Embryophyta; Tracheophyta; Spermatophyta; Magnoliopsida; eudicotyledons; Gunneridae; Pentapetalae; rosids; malvids; Brassicales; Brassicaceae; Camelineae; Arabidopsis	0.815037	0.932265	0.418799	-0.618715	0.764231	0.0930655	1.28996	1.22784	1.65595	1.43998	0.919734	1.69005	0.774281	0.147554	-4.64935	-3.06075	-3.83992
1	Nsylvestris_NODE_10233_length_2084_cov_105	SMH5_MAIZE^SMH5_MAIZE^Q:543-397,H:6-56^47.059%ID^E:9.89e-07^RecName: Full=Single myb histone 5;^Eukaryota; Viridiplantae; Streptophyta; Embryophyta; Tracheophyta; Spermatophyta; Magnoliopsida; Liliopsida; Poales; Poaceae; PACMAD clade; Panicoideae; Andropogonodae; Andropogoneae; Tripsacinae; Zea	1.05516	0.82027	-0.444374	-0.129057	0.169064	1.31867	2.27382	1.03786	0.812066	0.786464	0.362553	0.81123	1.25712	0.71474	-3.46416	-4.17171	-3.20971
1	Nsylvestris_NODE_10234_length_2084_cov_75	.	1.52045	1.97086	-0.420235	0.484089	1.1383	1.79941	2.98493	1.79475	0.314324	0.105277	-0.00519729	1.02602	0.518783	0.538711	-4.59016	-4.59016	-4.59016
1	Nsylvestris_NODE_10235_length_2084_cov_32	FSTL_FLABI^FSTL_FLABI^Q:1010-1843,H:35-307^45.714%ID^E:7.63e-79^RecName: Full=Flavonol sulfotransferase-like;^Eukaryota; Viridiplantae; Streptophyta; Embryophyta; Tracheophyta; Spermatophyta; Magnoliopsida; eudicotyledons; Gunneridae; Pentapetalae; asterids; campanulids; Asterales; Asteraceae; Asteroideae; Heliantheae alliance; Tageteae; Flaveria	0.486169	0.189239	0.57183	-0.708278	0.290691	1.61365	2.54355	1.52876	-0.0575134	0.190345	0.391258	0.876685	1.97622	-0.345708	-2.51563	-3.51563	-3.51563
1	Nsylvestris_NODE_10240_length_2083_cov_65	.	1.5028	1.10425	0.689215	-0.355179	0.689215	2.63351	2.87364	0.732284	-0.355179	0.551711	0.168383	-0.654739	1.75335	1.73228	-4.35518	-4.35518	-4.35518
1	Nsylvestris_NODE_10241_length_2083_cov_41	.	0.939863	0.73823	-0.26177	0.808619	0.416302	0.00126403	1.7017	1.17119	0.808619	1.06016	1.50376	-0.124267	0.664229	0.323192	-3.5837	-2.5837	-3.5837
1	Nsylvestris_NODE_10243_length_2082_cov_310	POLX_TOBAC^POLX_TOBAC^Q:2069-6,H:332-1026^44.993%ID^E:0^RecName: Full=Retrovirus-related Pol polyprotein from transposon TNT 1-94;^Eukaryota; Viridiplantae; Streptophyta; Embryophyta; Tracheophyta; Spermatophyta; Magnoliopsida; eudicotyledons; Gunneridae; Pentapetalae; asterids; lamiids; Solanales; Solanaceae; Nicotianoideae; Nicotianeae; Nicotiana	1.13909	1.09155	1.2988	0.383747	0.408585	1.08199	2.35599	0.17996	1.12811	0.742798	1.59407	1.38349	1.09371	0.881341	-5.4494	-6.4494	-2.86443
1	Nsylvestris_NODE_10245_length_2082_cov_155	BCAT2_HUMLU^BCAT2_HUMLU^Q:2032-1292,H:3-262^70.881%ID^E:4.74e-113^RecName: Full=Branched-chain amino acid aminotransferase 2, chloroplastic {ECO:0000303|PubMed:23347725};^Eukaryota; Viridiplantae; Streptophyta; Embryophyta; Tracheophyta; Spermatophyta; Magnoliopsida; eudicotyledons; Gunneridae; Pentapetalae; rosids; fabids; Rosales; Cannabaceae; Humulus`BCAT2_HUMLU^BCAT2_HUMLU^Q:768-331,H:262-407…	0.951073	1.28763	0.963818	0.0315002	0.661289	1.95651	2.53597	1.58568	1.08662	0.746275	1.22589	0.0367875	1.07106	0.0335797	-3.488	-6.22135	-4.46433
1	Nsylvestris_NODE_10247_length_2081_cov_226	LAC4_ARATH^LAC4_ARATH^Q:1928-309,H:9-547^76.481%ID^E:0^RecName: Full=Laccase-4;^Eukaryota; Viridiplantae; Streptophyta; Embryophyta; Tracheophyta; Spermatophyta; Magnoliopsida; eudicotyledons; Gunneridae; Pentapetalae; rosids; malvids; Brassicales; Brassicaceae; Camelineae; Arabidopsis	0.567917	1.12901	1.03823	0.531336	1.45271	-0.915163	2.26902	1.21825	0.772092	0.720069	-1.8455	0.636108	1.33779	0.166813	-2.37881	-4.50978	-2.19008
1	Nsylvestris_NODE_10249_length_2081_cov_191	RIO2_DICDI^RIO2_DICDI^Q:213-1223,H:1-320^56.677%ID^E:1.02e-123^RecName: Full=Serine/threonine-protein kinase rio2;^Eukaryota; Amoebozoa; Mycetozoa; Dictyostelids; Dictyosteliales; Dictyosteliaceae; Dictyostelium	0.243094	0.557494	0.459278	-0.546328	-0.072759	0.863986	1.52989	0.70699	0.54598	0.477123	0.250642	0.712817	0.273715	-0.147224	-2.63698	-1.43348	-1.78423
1	Nsylvestris_NODE_10251_length_2081_cov_72	.	-0.136737	1.27483	0.768234	-0.138793	-0.0734109	1.09619	2.46118	2.73113	0.609447	0.553231	1.01896	0.695071	0.830001	0.15529	-3.94821	-3.94821	-3.94821
1	Nsylvestris_NODE_10252_length_2081_cov_50	FBL23_ARATH^FBL23_ARATH^Q:231-947,H:181-418^47.934%ID^E:2.96e-63^RecName: Full=Putative F-box/LRR-repeat protein 23;^Eukaryota; Viridiplantae; Streptophyta; Embryophyta; Tracheophyta; Spermatophyta; Magnoliopsida; eudicotyledons; Gunneridae; Pentapetalae; rosids; malvids; Brassicales; Brassicaceae; Camelineae; Arabidopsis`FBL23_ARATH^FBL23_ARATH^Q:1224-1652,H:273-418^47.26%ID^E:2.27e-29^RecName: …	0.709791	1.05083	0.262332	0.890363	0.8029	2.05083	3.01235	0.972825	-0.612137	-0.1971	-1.1971	1.61026	-0.0271746	0.262332	-3.1971	-3.1971	-3.1971
1	Nsylvestris_NODE_10255_length_2080_cov_220	PUB4_ARATH^PUB4_ARATH^Q:1503-598,H:512-820^47.097%ID^E:1.54e-63^RecName: Full=U-box domain-containing protein 4;^Eukaryota; Viridiplantae; Streptophyta; Embryophyta; Tracheophyta; Spermatophyta; Magnoliopsida; eudicotyledons; Gunneridae; Pentapetalae; rosids; malvids; Brassicales; Brassicaceae; Camelineae; Arabidopsis	1.27217	1.44395	1.70812	0.711346	1.16941	0.73961	2.03876	2.36608	2.04907	1.27745	0.824364	-2.95499	-1.53974	-2.26705	-2.93448	-1.90716	-3.99691
1	Nsylvestris_NODE_10257_length_2080_cov_207	Y5382_ARATH^Y5382_ARATH^Q:1005-1598,H:1-194^54.04%ID^E:1.21e-66^RecName: Full=Uncharacterized protein At5g43822;^Eukaryota; Viridiplantae; Streptophyta; Embryophyta; Tracheophyta; Spermatophyta; Magnoliopsida; eudicotyledons; Gunneridae; Pentapetalae; rosids; malvids; Brassicales; Brassicaceae; Camelineae; Arabidopsis	0.219598	0.0219559	0.726019	-1.39148	-0.0959069	-0.499414	0.545484	0.884414	0.552245	0.41027	2.31994	0.0854744	2.70568	-0.434329	-1.76979	-2.34011	-1.94005
1	Nsylvestris_NODE_10259_length_2080_cov_196	SR34_ARATH^SR34_ARATH^Q:1984-1418,H:1-196^69.898%ID^E:1.11e-73^RecName: Full=Serine/arginine-rich-splicing factor SR34;^Eukaryota; Viridiplantae; Streptophyta; Embryophyta; Tracheophyta; Spermatophyta; Magnoliopsida; eudicotyledons; Gunneridae; Pentapetalae; rosids; malvids; Brassicales; Brassicaceae; Camelineae; Arabidopsis	0.781731	0.22229	-0.917434	-0.673349	0.184126	1.30083	2.178	1.06594	0.0363348	0.244923	-0.300967	0.135704	0.82554	0.284656	-1.82155	-1.65045	-1.89632
1	Nsylvestris_NODE_10262_length_2080_cov_43	PP229_ARATH^PP229_ARATH^Q:1361-288,H:320-677^63.687%ID^E:0^RecName: Full=Pentatricopeptide repeat-containing protein At3g14330;^Eukaryota; Viridiplantae; Streptophyta; Embryophyta; Tracheophyta; Spermatophyta; Magnoliopsida; eudicotyledons; Gunneridae; Pentapetalae; rosids; malvids; Brassicales; Brassicaceae; Camelineae; Arabidopsis`PP229_ARATH^PP229_ARATH^Q:1677-1363,H:218-322^51.429%ID^E:0^RecN…	1.04341	1.21913	0.606447	-0.91477	0.107257	2.05155	2.64218	1.06929	0.483123	1.09825	0.882129	0.571223	0.996132	0.446567	-4.10064	-4.10064	-4.10064
1	Nsylvestris_NODE_10266_length_2079_cov_182	ASK21_ARATH^ASK21_ARATH^Q:410-1456,H:1-345^59.155%ID^E:2.08e-112^RecName: Full=SKP1-like protein 21;^Eukaryota; Viridiplantae; Streptophyta; Embryophyta; Tracheophyta; Spermatophyta; Magnoliopsida; eudicotyledons; Gunneridae; Pentapetalae; rosids; malvids; Brassicales; Brassicaceae; Camelineae; Arabidopsis	0.497077	0.822797	1.11416	0.510272	1.24033	1.01043	2.13255	1.71187	1.13261	1.18448	0.985239	1.13963	1.22148	0.419999	-4.52422	-5.83456	-4.76417
1	Nsylvestris_NODE_10267_length_2079_cov_143	.	0.645887	1.49583	0.710862	-0.459988	1.65713	-0.208642	1.4971	-0.605855	2.34108	3.07448	0.144927	2.10786	0.852759	-0.681558	-4.83935	-3.51883	-4.21369
1	Nsylvestris_NODE_10268_length_2079_cov_112	UBC8_ARATH^UBC8_ARATH^Q:641-940,H:52-148^85%ID^E:2.21e-49^RecName: Full=Ubiquitin-conjugating enzyme E2 8;^Eukaryota; Viridiplantae; Streptophyta; Embryophyta; Tracheophyta; Spermatophyta; Magnoliopsida; eudicotyledons; Gunneridae; Pentapetalae; rosids; malvids; Brassicales; Brassicaceae; Camelineae; Arabidopsis	1.01938	0.982213	1.24042	0.0583196	1.26464	1.05597	2.36912	2.22907	0.425819	0.506076	0.928863	-0.228419	0.90542	-0.410295	-4.00395	-4.0427	-4.29996
1	Nsylvestris_NODE_1027_length_4901_cov_151	AB32G_ARATH^AB32G_ARATH^Q:412-4659,H:1-1420^68.614%ID^E:0^RecName: Full=ABC transporter G family member 32 {ECO:0000303|PubMed:18299247};^Eukaryota; Viridiplantae; Streptophyta; Embryophyta; Tracheophyta; Spermatophyta; Magnoliopsida; eudicotyledons; Gunneridae; Pentapetalae; rosids; malvids; Brassicales; Brassicaceae; Camelineae; Arabidopsis	-0.0161727	-1.06874	0.231308	-0.538766	-1.08491	1.39206	2.69912	1.39152	-0.174572	-1.1023	-0.159237	-0.0612182	1.25249	0.0909849	-0.635966	-1.50981	-0.705778
1	Nsylvestris_NODE_10270_length_2079_cov_72	MD33A_ARATH^MD33A_ARATH^Q:119-1243,H:8-381^45.867%ID^E:7.73e-98^RecName: Full=Mediator of RNA polymerase II transcription subunit 33A;^Eukaryota; Viridiplantae; Streptophyta; Embryophyta; Tracheophyta; Spermatophyta; Magnoliopsida; eudicotyledons; Gunneridae; Pentapetalae; rosids; malvids; Brassicales; Brassicaceae; Camelineae; Arabidopsis	0.185974	1.40997	0.825008	-0.552062	0.924544	0.694597	1.60322	1.18758	0.729148	0.960637	0.825008	0.821913	-0.116428	-0.552062	-2.98235	-2.98235	-2.98235
1	Nsylvestris_NODE_10271_length_2079_cov_62	R1B17_SOLDE^R1B17_SOLDE^Q:1102-2067,H:364-681^30.581%ID^E:2.51e-33^RecName: Full=Putative late blight resistance protein homolog R1B-17;^Eukaryota; Viridiplantae; Streptophyta; Embryophyta; Tracheophyta; Spermatophyta; Magnoliopsida; eudicotyledons; Gunneridae; Pentapetalae; asterids; lamiids; Solanales; Solanaceae; Solanoideae; Solaneae; Solanum	0.0440933	0.372186	-1.11033	0.194952	-0.84793	0.354766	1.04552	0.275609	1.31881	1.65794	0.703743	1.42212	1.0682	0.542213	-1.66007	-1.80505	-3.57678
1	Nsylvestris_NODE_10273_length_2079_cov_39	ZAT4_ARATH^ZAT4_ARATH^Q:944-504,H:182-314^43.506%ID^E:1.71e-23^RecName: Full=Zinc finger protein ZAT4;^Eukaryota; Viridiplantae; Streptophyta; Embryophyta; Tracheophyta; Spermatophyta; Magnoliopsida; eudicotyledons; Gunneridae; Pentapetalae; rosids; malvids; Brassicales; Brassicaceae; Camelineae; Arabidopsis	-0.662692	0.588846	1.92227	0.672911	0.92227	1.24877	2.23039	1.73941	-0.595578	-0.807082	-0.35457	-0.35457	-0.411154	-1.05501	-0.807082	-3.47005	-0.807082
1	Nsylvestris_NODE_10278_length_2078_cov_118	BROX_HUMAN^BROX_HUMAN^Q:1115-1717,H:147-357^26.364%ID^E:6.33e-08^RecName: Full=BRO1 domain-containing protein BROX;^Eukaryota; Metazoa; Chordata; Craniata; Vertebrata; Euteleostomi; Mammalia; Eutheria; Euarchontoglires; Primates; Haplorrhini; Catarrhini; Hominidae; Homo	-0.0406499	0.206872	0.342207	-0.130506	0.34467	0.558388	2.00833	1.5471	0.975493	0.291273	0.824673	0.247453	0.377759	-0.0425799	-3.06922	-2.51787	-1.92339
1	Nsylvestris_NODE_1028_length_4900_cov_209	ACOT9_HUMAN^ACOT9_HUMAN^Q:4128-3175,H:86-400^34.154%ID^E:3.35e-31^RecName: Full=Acyl-coenzyme A thioesterase 9, mitochondrial;^Eukaryota; Metazoa; Chordata; Craniata; Vertebrata; Euteleostomi; Mammalia; Eutheria; Euarchontoglires; Primates; Haplorrhini; Catarrhini; Hominidae; Homo	0.974294	0.980536	0.302184	0.236868	0.62024	1.47726	2.07566	1.40175	1.05995	0.919768	1.21739	0.579771	1.12169	0.521552	-5.14762	-4.00669	-4.33461
1	Nsylvestris_NODE_10280_length_2078_cov_77	UGT8_CATRO^UGT8_CATRO^Q:990-1565,H:167-362^61.224%ID^E:2.38e-94^RecName: Full=7-deoxyloganetic acid glucosyltransferase;^Eukaryota; Viridiplantae; Streptophyta; Embryophyta; Tracheophyta; Spermatophyta; Magnoliopsida; eudicotyledons; Gunneridae; Pentapetalae; asterids; lamiids; Gentianales; Apocynaceae; Rauvolfioideae; Vinceae; Catharanthinae; Catharanthus`UGT8_CATRO^UGT8_CATRO^Q:1651-1869,H:410-…	1.46857	1.13599	0.135991	-0.0953345	1.10902	1.93569	2.70303	1.10902	0.629031	0.287994	0.381104	1.23908	1.62903	0.188458	-4.6189	-4.6189	-4.6189
1	Nsylvestris_NODE_10281_length_2078_cov_10	.	0.297783	-0.550214	1.03475	-0.872142	0.127858	0.935213	2.33731	0.58729	0.58729	-0.0647868	1.37579	1.58729	0.935213	0.297783	-2.87214	-2.87214	-2.87214
1	Nsylvestris_NODE_10283_length_2077_cov_225	B2_DAUCA^B2_DAUCA^Q:462-827,H:76-202^32.558%ID^E:2.33e-16^RecName: Full=B2 protein;^Eukaryota; Viridiplantae; Streptophyta; Embryophyta; Tracheophyta; Spermatophyta; Magnoliopsida; eudicotyledons; Gunneridae; Pentapetalae; asterids; campanulids; Apiales; Apiaceae; Apioideae; Scandiceae; Daucinae; Daucus; Daucus sect. Daucus	0.991297	0.94237	0.669956	-0.105695	0.438168	1.40179	2.10615	0.793106	0.993879	1.07694	1.03127	0.881017	0.999787	0.521997	-4.45488	-3.77085	-4.51631
1	Nsylvestris_NODE_10284_length_2077_cov_217	CCR35_ARATH^CCR35_ARATH^Q:1732-695,H:1-362^59.511%ID^E:9.89e-134^RecName: Full=Serine/threonine-protein kinase-like protein At3g51990;^Eukaryota; Viridiplantae; Streptophyta; Embryophyta; Tracheophyta; Spermatophyta; Magnoliopsida; eudicotyledons; Gunneridae; Pentapetalae; rosids; malvids; Brassicales; Brassicaceae; Camelineae; Arabidopsis	1.27002	1.04954	0.831102	0.721083	1.14097	1.37784	2.77199	1.64169	0.983182	0.189009	0.350748	0.377815	1.88213	0.897556	-4.8575	-4.79625	-5.83093
1	Nsylvestris_NODE_10286_length_2077_cov_198	CYPR4_CYNCA^CYPR4_CYNCA^Q:652-2031,H:2-470^72.766%ID^E:0^RecName: Full=Protein CYPRO4;^Eukaryota; Viridiplantae; Streptophyta; Embryophyta; Tracheophyta; Spermatophyta; Magnoliopsida; eudicotyledons; Gunneridae; Pentapetalae; asterids; campanulids; Asterales; Asteraceae; Carduoideae; Cardueae; Carduinae; Cynara	1.14062	1.66737	0.722271	0.779118	1.42692	2.60943	2.21534	1.7745	-0.683059	0.441413	0.0131885	-0.172967	0.257694	0.586912	-4.25958	-4.25958	-4.25958
1	Nsylvestris_NODE_1029_length_4899_cov_229	KEULE_ARATH^KEULE_ARATH^Q:2305-350,H:15-666^77.829%ID^E:0^RecName: Full=SNARE-interacting protein KEULE;^Eukaryota; Viridiplantae; Streptophyta; Embryophyta; Tracheophyta; Spermatophyta; Magnoliopsida; eudicotyledons; Gunneridae; Pentapetalae; rosids; malvids; Brassicales; Brassicaceae; Camelineae; Arabidopsis	0.618934	1.01356	1.00408	0.0176243	0.765075	0.649982	1.82754	1.31868	0.767106	0.601082	0.770327	0.749136	1.00353	0.281625	-3.36062	-4.21312	-3.81455
1	Nsylvestris_NODE_10290_length_2077_cov_70	HFA6B_ARATH^HFA6B_ARATH^Q:402-1334,H:54-394^52.339%ID^E:1.4e-112^RecName: Full=Heat stress transcription factor A-6b;^Eukaryota; Viridiplantae; Streptophyta; Embryophyta; Tracheophyta; Spermatophyta; Magnoliopsida; eudicotyledons; Gunneridae; Pentapetalae; rosids; malvids; Brassicales; Brassicaceae; Camelineae; Arabidopsis	1.15177	0.595884	1.10392	-3.27466	0.28678	2.00336	3.08944	1.51723	0.34107	0.910334	-0.0576658	-0.0794427	1.58826	0.32754	-4.28186	-2.64495	-2.57699
1	Nsylvestris_NODE_10291_length_2076_cov_216	TBC15_HUMAN^TBC15_HUMAN^Q:1549-665,H:311-554^29.53%ID^E:2.32e-31^RecName: Full=TBC1 domain family member 15;^Eukaryota; Metazoa; Chordata; Craniata; Vertebrata; Euteleostomi; Mammalia; Eutheria; Euarchontoglires; Primates; Haplorrhini; Catarrhini; Hominidae; Homo	0.902387	-1.28762	1.54303	-1.44028	0.321922	-1.21323	0.688692	0.214069	1.18897	0.0687331	2.82427	0.20575	4.96993	0.342937	-4.16929	-3.07844	-2.08183
1	Nsylvestris_NODE_10293_length_2076_cov_206	MCAC1_ARATH^MCAC1_ARATH^Q:587-1834,H:4-420^67.78%ID^E:0^RecName: Full=Protein MID1-COMPLEMENTING ACTIVITY 1;^Eukaryota; Viridiplantae; Streptophyta; Embryophyta; Tracheophyta; Spermatophyta; Magnoliopsida; eudicotyledons; Gunneridae; Pentapetalae; rosids; malvids; Brassicales; Brassicaceae; Camelineae; Arabidopsis	-1.83358	0.523104	0.216689	-0.0991821	-0.0258489	2.27327	2.64144	2.08171	0.856309	1.01594	-0.0285872	0.581324	-0.0904428	0.40511	-2.21903	-3.14207	-3.15616
1	Nsylvestris_NODE_10294_length_2076_cov_114	BRG3_ARATH^BRG3_ARATH^Q:847-263,H:128-333^28.641%ID^E:3.17e-19^RecName: Full=Probable BOI-related E3 ubiquitin-protein ligase 3;^Eukaryota; Viridiplantae; Streptophyta; Embryophyta; Tracheophyta; Spermatophyta; Magnoliopsida; eudicotyledons; Gunneridae; Pentapetalae; rosids; malvids; Brassicales; Brassicaceae; Camelineae; Arabidopsis	0.405655	0.759031	1.45903	0.646557	1.52372	1.13754	2.28259	1.9449	0.391765	0.287603	-0.0481432	-0.167834	1.45925	0.607028	-3.5629	-4.5629	-4.5629
1	Nsylvestris_NODE_10295_length_2076_cov_43	.	0.507112	1.11118	-0.965217	-0.0492815	0.507112	1.69615	2.65858	1.56647	0.207374	0.507689	0.863706	1.15051	1.36438	1.28448	-4.13674	-4.13674	-4.13674
1	Nsylvestris_NODE_10296_length_2075_cov_218	Y5390_ARATH^Y5390_ARATH^Q:1779-241,H:1-523^66.224%ID^E:0^RecName: Full=Uncharacterized protein At5g03900, chloroplastic;^Eukaryota; Viridiplantae; Streptophyta; Embryophyta; Tracheophyta; Spermatophyta; Magnoliopsida; eudicotyledons; Gunneridae; Pentapetalae; rosids; malvids; Brassicales; Brassicaceae; Camelineae; Arabidopsis	0.123276	0.332504	-0.121927	-0.587976	-0.287416	0.759948	1.97295	1.20271	0.477078	0.27967	0.633353	0.410852	0.790504	0.486539	-1.90008	-2.04703	-2.52497
1	Nsylvestris_NODE_103_length_8371_cov_118	POLX_TOBAC^POLX_TOBAC^Q:5204-2541,H:8-898^44.053%ID^E:0^RecName: Full=Retrovirus-related Pol polyprotein from transposon TNT 1-94;^Eukaryota; Viridiplantae; Streptophyta; Embryophyta; Tracheophyta; Spermatophyta; Magnoliopsida; eudicotyledons; Gunneridae; Pentapetalae; asterids; lamiids; Solanales; Solanaceae; Nicotianoideae; Nicotianeae; Nicotiana`POLX_TOBAC^POLX_TOBAC^Q:2596-1259,H:876-1328^75.…	1.66093	1.25266	0.660224	0.222058	-0.212139	0.8835	2.24434	1.11585	0.84348	0.516936	1.21146	1.28964	1.09936	1.10319	-5.02207	-6.02207	-2.84734
1	Nsylvestris_NODE_10302_length_2075_cov_35	HIBC1_ARATH^HIBC1_ARATH^Q:1094-1011,H:165-192^96.429%ID^E:4.27e-08^RecName: Full=3-hydroxyisobutyryl-CoA hydrolase 1;^Eukaryota; Viridiplantae; Streptophyta; Embryophyta; Tracheophyta; Spermatophyta; Magnoliopsida; eudicotyledons; Gunneridae; Pentapetalae; rosids; malvids; Brassicales; Brassicaceae; Camelineae; Arabidopsis	0.304403	1.18103	0.187493	-0.359994	-0.133719	0.855502	1.66903	1.31886	1.00036	-0.153544	1.44046	0.33964	0.75854	0.0254266	-3.1445	-3.1445	-2.1445
1	Nsylvestris_NODE_10304_length_2075_cov_7	.	0.0761907	0.813156	0.329171	0.661153	-0.508772	0.699121	2.12814	1.33722	0.813156	0.661153	0.321078	0.615556	-0.923809	0.503797	-2.50877	-2.50877	-2.50877
1	Nsylvestris_NODE_10305_length_2074_cov_217	DNJ16_ARATH^DNJ16_ARATH^Q:345-1421,H:1-359^79.666%ID^E:0^RecName: Full=Chaperone protein dnaJ 16;^Eukaryota; Viridiplantae; Streptophyta; Embryophyta; Tracheophyta; Spermatophyta; Magnoliopsida; eudicotyledons; Gunneridae; Pentapetalae; rosids; malvids; Brassicales; Brassicaceae; Camelineae; Arabidopsis	0.728934	0.0936405	0.611533	-0.122019	0.906664	0.690967	1.37461	1.53903	1.11395	0.519673	0.414847	0.12833	1.44978	0.103481	-4.05209	-2.47671	-3.02461
1	Nsylvestris_NODE_10308_length_2074_cov_164	NIPA6_ARATH^NIPA6_ARATH^Q:642-1622,H:3-328^72.866%ID^E:4.25e-142^RecName: Full=Probable magnesium transporter NIPA6;^Eukaryota; Viridiplantae; Streptophyta; Embryophyta; Tracheophyta; Spermatophyta; Magnoliopsida; eudicotyledons; Gunneridae; Pentapetalae; rosids; malvids; Brassicales; Brassicaceae; Camelineae; Arabidopsis	0.628673	0.702515	0.788435	-0.271749	0.300662	1.28607	2.11513	1.60935	1.42847	0.722545	0.317794	1.61815	1.24104	0.675573	-3.52419	-5.14116	-4.49731
1	Nsylvestris_NODE_1031_length_4896_cov_213	KPPR_WHEAT^KPPR_WHEAT^Q:3219-4397,H:2-391^84.01%ID^E:0^RecName: Full=Phosphoribulokinase, chloroplastic;^Eukaryota; Viridiplantae; Streptophyta; Embryophyta; Tracheophyta; Spermatophyta; Magnoliopsida; Liliopsida; Poales; Poaceae; BOP clade; Pooideae; Triticodae; Triticeae; Triticinae; Triticum	0.472855	0.887068	0.0699507	-0.134429	0.701841	1.23825	2.02512	1.87218	1.45251	1.43135	1.73702	1.12934	1.20084	0.511045	-4.22569	-4.95943	-5.40982
1	Nsylvestris_NODE_10310_length_2074_cov_143	COAC1_ARATH^COAC1_ARATH^Q:1445-432,H:3-329^70.175%ID^E:1.16e-150^RecName: Full=Mitochondrial carrier protein CoAc1 {ECO:0000305};^Eukaryota; Viridiplantae; Streptophyta; Embryophyta; Tracheophyta; Spermatophyta; Magnoliopsida; eudicotyledons; Gunneridae; Pentapetalae; rosids; malvids; Brassicales; Brassicaceae; Camelineae; Arabidopsis	0.604344	0.775896	-0.126839	-0.364303	0.81294	1.08338	1.90118	2.35555	1.67013	1.39145	1.04208	1.17813	1.60486	0.920466	-4.75662	-4.29337	-5.79926
1	Nsylvestris_NODE_10311_length_2074_cov_121	R18AL_ARATH^R18AL_ARATH^Q:1081-1341,H:66-152^57.955%ID^E:1.16e-19^RecName: Full=60S ribosomal protein L18a-like protein;^Eukaryota; Viridiplantae; Streptophyta; Embryophyta; Tracheophyta; Spermatophyta; Magnoliopsida; eudicotyledons; Gunneridae; Pentapetalae; rosids; malvids; Brassicales; Brassicaceae; Camelineae; Arabidopsis	0.153235	0.256004	-0.0422274	-0.694098	-0.180308	1.33628	2.13931	0.883772	0.220042	0.413671	0.209726	-0.825166	0.76145	0.243363	-1.81102	-1.63139	-1.43264
1	Nsylvestris_NODE_10312_length_2074_cov_68	DTX43_ARATH^DTX43_ARATH^Q:1918-314,H:1-518^62.804%ID^E:0^RecName: Full=Protein DETOXIFICATION 43 {ECO:0000303|PubMed:11739388};^Eukaryota; Viridiplantae; Streptophyta; Embryophyta; Tracheophyta; Spermatophyta; Magnoliopsida; eudicotyledons; Gunneridae; Pentapetalae; rosids; malvids; Brassicales; Brassicaceae; Camelineae; Arabidopsis	1.71922	1.51064	0.109203	-0.595304	1.23141	-1.4417	1.36566	1.4063	0.821337	0.246259	1.21914	0.792804	2.26627	0.639642	-3.76363	-3.76363	-3.76363
1	Nsylvestris_NODE_10313_length_2073_cov_212	GAE3_ARATH^GAE3_ARATH^Q:1631-330,H:1-428^81.149%ID^E:0^RecName: Full=UDP-glucuronate 4-epimerase 3;^Eukaryota; Viridiplantae; Streptophyta; Embryophyta; Tracheophyta; Spermatophyta; Magnoliopsida; eudicotyledons; Gunneridae; Pentapetalae; rosids; malvids; Brassicales; Brassicaceae; Camelineae; Arabidopsis	0.55118	0.722363	0.883696	0.441113	0.906003	1.22035	2.00084	1.3874	0.871772	-0.0338547	1.22545	0.789741	2.41511	0.172175	-4.72193	-4.0982	-4.73321
1	Nsylvestris_NODE_10315_length_2073_cov_131	ULP1D_ARATH^ULP1D_ARATH^Q:1680-550,H:201-580^43.947%ID^E:2.89e-100^RecName: Full=Ubiquitin-like-specific protease 1D;^Eukaryota; Viridiplantae; Streptophyta; Embryophyta; Tracheophyta; Spermatophyta; Magnoliopsida; eudicotyledons; Gunneridae; Pentapetalae; rosids; malvids; Brassicales; Brassicaceae; Camelineae; Arabidopsis	0.513118	0.924493	0.543339	-0.179252	-0.0640021	1.0187	2.38307	1.40945	0.22481	0.323214	0.554755	0.276575	0.43071	-0.266346	-3.07716	-2.71483	-2.30065
1	Nsylvestris_NODE_10317_length_2072_cov_231	.	0.759184	-2.2055	2.65443	-1.47734	0.978647	-0.825778	-3.31628	0.769592	-0.0651439	0.284963	4.00069	-0.665123	5.02587	0.44287	-2.1173	-1.83667	-2.40713
1	Nsylvestris_NODE_10319_length_2072_cov_220	SYMM_ARATH^SYMM_ARATH^Q:172-1929,H:1-581^75.973%ID^E:0^RecName: Full=Methionine--tRNA ligase, chloroplastic/mitochondrial {ECO:0000305};^Eukaryota; Viridiplantae; Streptophyta; Embryophyta; Tracheophyta; Spermatophyta; Magnoliopsida; eudicotyledons; Gunneridae; Pentapetalae; rosids; malvids; Brassicales; Brassicaceae; Camelineae; Arabidopsis	0.746428	0.826133	0.0590503	-0.168789	-0.02133	0.720896	2.26664	0.801253	0.200626	0.111771	0.28223	0.295132	0.0454311	0.388288	-2.23791	-1.98978	-2.32607
1	Nsylvestris_NODE_10320_length_2072_cov_209	SPSY_ARATH^SPSY_ARATH^Q:1674-592,H:1-356^77.839%ID^E:0^RecName: Full=Spermine synthase;^Eukaryota; Viridiplantae; Streptophyta; Embryophyta; Tracheophyta; Spermatophyta; Magnoliopsida; eudicotyledons; Gunneridae; Pentapetalae; rosids; malvids; Brassicales; Brassicaceae; Camelineae; Arabidopsis	-0.0110428	0.35063	-0.232212	-0.0407404	0.495355	1.55092	2.3142	1.48352	1.41474	1.83726	0.339396	0.922561	1.38859	0.610104	-4.14064	-3.68035	-4.6023
1	Nsylvestris_NODE_10322_length_2072_cov_199	HSDD2_ARATH^HSDD2_ARATH^Q:1903-800,H:9-376^77.446%ID^E:0^RecName: Full=3beta-hydroxysteroid-dehydrogenase/decarboxylase isoform 2;^Eukaryota; Viridiplantae; Streptophyta; Embryophyta; Tracheophyta; Spermatophyta; Magnoliopsida; eudicotyledons; Gunneridae; Pentapetalae; rosids; malvids; Brassicales; Brassicaceae; Camelineae; Arabidopsis	0.265508	1.46196	0.576879	0.321014	0.50587	1.7604	2.09089	1.84747	0.692493	0.0805831	0.0467764	0.565068	-0.0831612	-0.408531	-1.98903	-3.05942	-4.67476
1	Nsylvestris_NODE_10323_length_2072_cov_149	.	1.39084	1.35052	-0.509169	0.845918	1.77966	2.1671	2.86276	1.70524	0.525128	0.440887	-0.08539	0.336912	1.01135	0.339947	-5.79846	-4.28983	-4.07341
1	Nsylvestris_NODE_10326_length_2072_cov_81	PIF5_ARATH^PIF5_ARATH^Q:269-1678,H:1-428^33.004%ID^E:1.11e-44^RecName: Full=Transcription factor PIF5;^Eukaryota; Viridiplantae; Streptophyta; Embryophyta; Tracheophyta; Spermatophyta; Magnoliopsida; eudicotyledons; Gunneridae; Pentapetalae; rosids; malvids; Brassicales; Brassicaceae; Camelineae; Arabidopsis	1.63725	0.735921	0.605525	-0.488004	-0.283747	2.11871	2.3049	1.71246	0.673096	-0.0925585	0.434105	0.456593	2.21625	0.365203	-4.24524	-4.91427	-3.2362
1	Nsylvestris_NODE_10328_length_2071_cov_214	RH20_ARATH^RH20_ARATH^Q:170-1591,H:1-477^83.019%ID^E:0^RecName: Full=DEAD-box ATP-dependent RNA helicase 20;^Eukaryota; Viridiplantae; Streptophyta; Embryophyta; Tracheophyta; Spermatophyta; Magnoliopsida; eudicotyledons; Gunneridae; Pentapetalae; rosids; malvids; Brassicales; Brassicaceae; Camelineae; Arabidopsis	0.358715	0.587972	0.0593625	-0.504282	0.338105	0.742794	1.45915	1.42789	0.193298	0.559555	0.296711	-0.265723	0.498176	0.133097	-1.68101	-1.91879	-2.28502
1	Nsylvestris_NODE_10329_length_2071_cov_191	LAZ1_ARATH^LAZ1_ARATH^Q:1802-423,H:21-485^73.333%ID^E:0^RecName: Full=Protein LAZ1 {ECO:0000303|PubMed:20830211};^Eukaryota; Viridiplantae; Streptophyta; Embryophyta; Tracheophyta; Spermatophyta; Magnoliopsida; eudicotyledons; Gunneridae; Pentapetalae; rosids; malvids; Brassicales; Brassicaceae; Camelineae; Arabidopsis	0.811735	1.21111	0.79225	-0.390051	0.8342	1.64726	2.36751	1.81757	0.99072	0.867958	1.05733	0.921621	1.32085	1.26327	-4.66041	-7.07725	-3.77566
1	Nsylvestris_NODE_1033_length_4895_cov_231	PHYE_IPONI^PHYE_IPONI^Q:2789-3,H:24-955^78.992%ID^E:0^RecName: Full=Phytochrome E;^Eukaryota; Viridiplantae; Streptophyta; Embryophyta; Tracheophyta; Spermatophyta; Magnoliopsida; eudicotyledons; Gunneridae; Pentapetalae; asterids; lamiids; Solanales; Convolvulaceae; Ipomoeeae; Ipomoea	0.268947	0.47904	-0.234842	-0.341515	-0.148598	0.771671	1.82211	1.19091	0.968369	0.994539	0.860252	-0.101759	0.425434	-0.0425384	-2.20712	-2.54029	-2.16461
1	Nsylvestris_NODE_10332_length_2071_cov_17	.	-0.401238	0.113336	0.698298	-1.62363	-0.886664	1.25084	1.79141	0.791407	3.07681	3.25084	1.43526	-0.0386675	-1.20859	-0.208593	-1.62363	-3.20859	-3.20859
1	Nsylvestris_NODE_10336_length_2070_cov_210	ALG12_ARATH^ALG12_ARATH^Q:111-1586,H:6-497^66.87%ID^E:0^RecName: Full=Dol-P-Man:Man(7)GlcNAc(2)-PP-Dol alpha-1,6-mannosyltransferase;^Eukaryota; Viridiplantae; Streptophyta; Embryophyta; Tracheophyta; Spermatophyta; Magnoliopsida; eudicotyledons; Gunneridae; Pentapetalae; rosids; malvids; Brassicales; Brassicaceae; Camelineae; Arabidopsis	-0.0127923	0.707968	0.464042	-0.197421	0.467644	0.944035	1.428	1.08648	0.896439	0.952043	0.767323	0.690226	0.181668	-0.0472807	-2.97653	-2.95201	-2.39984
1	Nsylvestris_NODE_10339_length_2070_cov_166	CARME_HUMAN^CARME_HUMAN^Q:1273-500,H:154-407^47.692%ID^E:9.87e-80^RecName: Full=Carnosine N-methyltransferase {ECO:0000303|PubMed:26001783, ECO:0000312|HGNC:HGNC:23435};^Eukaryota; Metazoa; Chordata; Craniata; Vertebrata; Euteleostomi; Mammalia; Eutheria; Euarchontoglires; Primates; Haplorrhini; Catarrhini; Hominidae; Homo	0.425249	0.51858	0.201908	-0.462483	-0.256611	0.375628	0.880291	0.109175	0.432059	0.742705	0.283244	0.291537	-0.165985	0.0895678	-0.945123	-1.38638	-1.13336
1	Nsylvestris_NODE_1034_length_4895_cov_99	MES11_ARATH^MES11_ARATH^Q:4322-3534,H:127-389^74.144%ID^E:2.21e-125^RecName: Full=Putative methylesterase 11, chloroplastic;^Eukaryota; Viridiplantae; Streptophyta; Embryophyta; Tracheophyta; Spermatophyta; Magnoliopsida; eudicotyledons; Gunneridae; Pentapetalae; rosids; malvids; Brassicales; Brassicaceae; Camelineae; Arabidopsis	0.516432	0.776616	0.684224	0.526817	1.2298	0.818136	1.77451	0.239241	0.246903	0.802447	-0.118297	0.158092	0.230883	-0.100473	-2.43689	-3.22052	-2.12792
1	Nsylvestris_NODE_10340_length_2070_cov_140	RP8L3_ARATH^RP8L3_ARATH^Q:6-1814,H:290-890^31.392%ID^E:7.11e-66^RecName: Full=Disease resistance RPP8-like protein 3;^Eukaryota; Viridiplantae; Streptophyta; Embryophyta; Tracheophyta; Spermatophyta; Magnoliopsida; eudicotyledons; Gunneridae; Pentapetalae; rosids; malvids; Brassicales; Brassicaceae; Camelineae; Arabidopsis	1.0921	1.20648	0.226618	0.274469	0.575748	0.577689	2.06664	1.37648	0.945744	0.626318	1.36715	1.00656	1.12676	1.19536	-3.85961	-4.90225	-4.90225
1	Nsylvestris_NODE_10341_length_2070_cov_130	INVB_ARATH^INVB_ARATH^Q:1650-49,H:5-538^81.784%ID^E:0^RecName: Full=Probable alkaline/neutral invertase B {ECO:0000305};^Eukaryota; Viridiplantae; Streptophyta; Embryophyta; Tracheophyta; Spermatophyta; Magnoliopsida; eudicotyledons; Gunneridae; Pentapetalae; rosids; malvids; Brassicales; Brassicaceae; Camelineae; Arabidopsis	-0.981878	1.32095	-1.08901	-0.658276	-1.50806	2.36138	3.58801	1.9304	1.00762	0.725201	-0.102596	1.7793	1.61559	0.0674971	-3.35204	-3.35204	-3.35204
1	Nsylvestris_NODE_10344_length_2070_cov_25	.	1.98335	-0.0184569	0.0858798	-0.0184569	-0.0184569	0.303471	3.22947	2.30347	-0.282935	2.03204	1.51136	-1.01846	-2.01846	-2.01846	-2.01846	-2.01846	-2.01846
1	Nsylvestris_NODE_10345_length_2070_cov_19	SD25_ARATH^SD25_ARATH^Q:2070-124,H:122-770^34.795%ID^E:1.74e-115^RecName: Full=G-type lectin S-receptor-like serine/threonine-protein kinase SD2-5;^Eukaryota; Viridiplantae; Streptophyta; Embryophyta; Tracheophyta; Spermatophyta; Magnoliopsida; eudicotyledons; Gunneridae; Pentapetalae; rosids; malvids; Brassicales; Brassicaceae; Camelineae; Arabidopsis	0.526871	1.11183	1.48107	0.919188	2.01872	1.04981	2.46115	2.05043	-1.47313	-0.473129	-0.888167	-1.1512	-0.888167	-0.665774	-1.1512	-3.45877	-1.46953
1	Nsylvestris_NODE_10349_length_2069_cov_198	TBL23_ARATH^TBL23_ARATH^Q:518-1624,H:58-428^57.951%ID^E:2.48e-165^RecName: Full=Protein trichome birefringence-like 23;^Eukaryota; Viridiplantae; Streptophyta; Embryophyta; Tracheophyta; Spermatophyta; Magnoliopsida; eudicotyledons; Gunneridae; Pentapetalae; rosids; malvids; Brassicales; Brassicaceae; Camelineae; Arabidopsis	-0.278778	0.92257	0.390447	-0.030273	0.485692	1.03729	2.02249	1.17713	0.431863	0.533374	-0.437663	0.117469	0.646567	-0.293107	-1.96698	-2.80868	-1.94941
1	Nsylvestris_NODE_1035_length_4895_cov_55	.	0.655306	0.669805	0.106538	-0.959551	-0.231631	1.21057	2.71259	2.08484	0.898181	0.821546	1.6915	1.62549	1.84135	1.78864	-4.95955	-4.95955	-4.99608
1	Nsylvestris_NODE_10353_length_2069_cov_47	.	0.126717	0.812326	-0.462383	-1.1532	0.53467	-0.732107	-0.944151	-0.123414	2.0906	2.04139	0.510539	2.10899	0.107892	0.0914955	-0.760786	-2.43452	-1.81406
1	Nsylvestris_NODE_10358_length_2068_cov_97	KCO1_ARATH^KCO1_ARATH^Q:1383-469,H:52-358^59.609%ID^E:2.54e-125^RecName: Full=Two-pore potassium channel 1;^Eukaryota; Viridiplantae; Streptophyta; Embryophyta; Tracheophyta; Spermatophyta; Magnoliopsida; eudicotyledons; Gunneridae; Pentapetalae; rosids; malvids; Brassicales; Brassicaceae; Camelineae; Arabidopsis	0.17858	0.376028	-0.404256	-0.505656	-0.0360322	1.02279	1.97765	1.51134	-0.3358	-0.637019	-0.947672	-0.152613	0.692108	0.0149034	-1.38184	-0.527892	-0.844622
1	Nsylvestris_NODE_10359_length_2068_cov_84	PP2A_TOBAC^PP2A_TOBAC^Q:1991-2068,H:137-162^92.308%ID^E:1.03e-06^RecName: Full=Serine/threonine-protein phosphatase PP2A catalytic subunit;^Eukaryota; Viridiplantae; Streptophyta; Embryophyta; Tracheophyta; Spermatophyta; Magnoliopsida; eudicotyledons; Gunneridae; Pentapetalae; asterids; lamiids; Solanales; Solanaceae; Nicotianoideae; Nicotianeae; Nicotiana	1.39613	-0.188828	-0.0758893	0.106476	-0.297964	1.21327	2.94633	1.67624	0.462593	0.105636	1.29697	1.06213	1.03636	1.24908	-3.99618	-3.99618	-3.99618
1	Nsylvestris_NODE_1036_length_4892_cov_55	PPA28_ARATH^PPA28_ARATH^Q:161-922,H:4-258^60.232%ID^E:9.24e-97^RecName: Full=Probable inactive purple acid phosphatase 28;^Eukaryota; Viridiplantae; Streptophyta; Embryophyta; Tracheophyta; Spermatophyta; Magnoliopsida; eudicotyledons; Gunneridae; Pentapetalae; rosids; malvids; Brassicales; Brassicaceae; Camelineae; Arabidopsis`PPA28_ARATH^PPA28_ARATH^Q:930-1379,H:227-390^56.707%ID^E:5.67e-43^Rec…	0.49978	0.865723	-0.246692	0.037431	-0.497603	1.63765	2.08875	0.902848	0.34317	0.623235	0.0298312	0.255899	0.899675	0.39099	-2.71417	-2.61552	-2.50101
1	Nsylvestris_NODE_10360_length_2068_cov_73	IF4A9_TOBAC^IF4A9_TOBAC^Q:749-1816,H:59-412^76.966%ID^E:0^RecName: Full=Eukaryotic initiation factor 4A-9;^Eukaryota; Viridiplantae; Streptophyta; Embryophyta; Tracheophyta; Spermatophyta; Magnoliopsida; eudicotyledons; Gunneridae; Pentapetalae; asterids; lamiids; Solanales; Solanaceae; Nicotianoideae; Nicotianeae; Nicotiana	0.288849	0.343297	0.717692	0.111971	1.19633	0.395764	1.98073	2.04784	0.542606	-0.711151	0.111971	-0.241666	0.421299	0.0478411	-2.82663	-1.60012	-2.82663
1	Nsylvestris_NODE_10361_length_2068_cov_58	.	-0.471985	-0.36507	-0.0849621	-0.471985	0.0755026	1.66047	2.66047	1.31943	0.219205	1.4414	1.68506	1.5555	2.07436	1.21989	-4.17242	-4.17242	-4.17242
1	Nsylvestris_NODE_10362_length_2067_cov_225	TAUE3_ARATH^TAUE3_ARATH^Q:197-1639,H:1-474^67.427%ID^E:1.81e-171^RecName: Full=Sulfite exporter TauE/SafE family protein 3 {ECO:0000312|EMBL:AEC07746.1};^Eukaryota; Viridiplantae; Streptophyta; Embryophyta; Tracheophyta; Spermatophyta; Magnoliopsida; eudicotyledons; Gunneridae; Pentapetalae; rosids; malvids; Brassicales; Brassicaceae; Camelineae; Arabidopsis	0.65526	0.350354	-0.282436	-0.570311	0.226994	1.55098	2.12944	1.56376	1.00824	0.989228	0.404495	0.128845	1.10748	0.680238	-2.91665	-3.64807	-3.37786
1	Nsylvestris_NODE_10368_length_2066_cov_219	SYPC_ARATH^SYPC_ARATH^Q:1710-265,H:50-530^85.477%ID^E:0^RecName: Full=Proline--tRNA ligase, cytoplasmic {ECO:0000305};^Eukaryota; Viridiplantae; Streptophyta; Embryophyta; Tracheophyta; Spermatophyta; Magnoliopsida; eudicotyledons; Gunneridae; Pentapetalae; rosids; malvids; Brassicales; Brassicaceae; Camelineae; Arabidopsis	0.222188	1.09103	0.74294	-0.0358821	0.627402	1.12056	1.85724	1.34561	0.842026	1.05853	0.812602	0.345107	0.263318	-0.164598	-3.06862	-3.94873	-3.11072
1	Nsylvestris_NODE_1037_length_4891_cov_232	FLZ8_ARATH^FLZ8_ARATH^Q:3530-4456,H:1-265^43.226%ID^E:4.62e-57^RecName: Full=FCS-Like Zinc finger 8 {ECO:0000303|PubMed:24901469};^Eukaryota; Viridiplantae; Streptophyta; Embryophyta; Tracheophyta; Spermatophyta; Magnoliopsida; eudicotyledons; Gunneridae; Pentapetalae; rosids; malvids; Brassicales; Brassicaceae; Camelineae; Arabidopsis	0.662493	0.959626	0.584583	-0.307607	-0.053166	0.923481	1.79621	1.48915	0.45088	0.734226	0.888905	0.484892	0.94608	0.381548	-3.62889	-3.11548	-3.19693
1	Nsylvestris_NODE_10370_length_2066_cov_204	SERA1_ARATH^SERA1_ARATH^Q:1811-156,H:48-603^83.813%ID^E:0^RecName: Full=D-3-phosphoglycerate dehydrogenase 1, chloroplastic;^Eukaryota; Viridiplantae; Streptophyta; Embryophyta; Tracheophyta; Spermatophyta; Magnoliopsida; eudicotyledons; Gunneridae; Pentapetalae; rosids; malvids; Brassicales; Brassicaceae; Camelineae; Arabidopsis	0.49643	2.03294	0.38561	0.491376	1.04679	1.91827	2.84681	0.871148	1.16546	1.47635	-0.211597	1.53202	1.54323	0.640145	-5.41166	-5.41166	-5.41166
1	Nsylvestris_NODE_10371_length_2066_cov_176	DPH2_DANRE^DPH2_DANRE^Q:1990-470,H:16-490^32.549%ID^E:6.87e-86^RecName: Full=2-(3-amino-3-carboxypropyl)histidine synthase subunit 2 {ECO:0000305};^Eukaryota; Metazoa; Chordata; Craniata; Vertebrata; Euteleostomi; Actinopterygii; Neopterygii; Teleostei; Ostariophysi; Cypriniformes; Cyprinidae; Danio	0.323585	1.30131	0.577555	-0.0270871	0.551483	1.2704	1.89965	1.5944	0.863916	0.847173	0.473025	0.842154	0.741671	0.0203421	-3.51512	-3.50088	-4.26358
1	Nsylvestris_NODE_10375_length_2066_cov_161	RLT2_ARATH^RLT2_ARATH^Q:1257-121,H:21-368^48.718%ID^E:1.28e-80^RecName: Full=Homeobox-DDT domain protein RLT2 {ECO:0000305};^Eukaryota; Viridiplantae; Streptophyta; Embryophyta; Tracheophyta; Spermatophyta; Magnoliopsida; eudicotyledons; Gunneridae; Pentapetalae; rosids; malvids; Brassicales; Brassicaceae; Camelineae; Arabidopsis	1.56665	1.03848	0.239728	0.231199	0.821681	1.97187	2.27101	0.642084	1.4154	0.70801	0.776926	1.08998	1.8061	1.03892	-4.48331	-5.56737	-5.56737
1	Nsylvestris_NODE_10381_length_2064_cov_179	UVR8_ARATH^UVR8_ARATH^Q:1792-740,H:15-355^33.333%ID^E:6.04e-45^RecName: Full=Ultraviolet-B receptor UVR8;^Eukaryota; Viridiplantae; Streptophyta; Embryophyta; Tracheophyta; Spermatophyta; Magnoliopsida; eudicotyledons; Gunneridae; Pentapetalae; rosids; malvids; Brassicales; Brassicaceae; Camelineae; Arabidopsis`UVR8_ARATH^UVR8_ARATH^Q:1618-578,H:20-345^32.011%ID^E:4.97e-36^RecName: Full=Ultraviol…	0.818628	0.648291	-0.782296	-0.328909	0.110315	0.865665	2.1716	1.20861	0.427142	-0.274417	-0.80523	0.757084	0.978516	0.474658	-2.33719	-1.80747	-2.125
1	Nsylvestris_NODE_10382_length_2064_cov_139	SUVR2_ARATH^SUVR2_ARATH^Q:785-462,H:205-311^42.593%ID^E:8.94e-16^RecName: Full=Probable inactive histone-lysine N-methyltransferase SUVR2;^Eukaryota; Viridiplantae; Streptophyta; Embryophyta; Tracheophyta; Spermatophyta; Magnoliopsida; eudicotyledons; Gunneridae; Pentapetalae; rosids; malvids; Brassicales; Brassicaceae; Camelineae; Arabidopsis	1.21763	1.65776	1.70507	0.838333	0.953288	0.657761	2.19049	2.45806	0.558225	0.566241	0.824519	0.689344	0.645397	0.166088	-5.57106	-5.57106	-3.9861
1	Nsylvestris_NODE_10387_length_2064_cov_44	R13L3_ARATH^R13L3_ARATH^Q:2059-626,H:361-841^34.8%ID^E:6.67e-52^RecName: Full=Putative disease resistance RPP13-like protein 3;^Eukaryota; Viridiplantae; Streptophyta; Embryophyta; Tracheophyta; Spermatophyta; Magnoliopsida; eudicotyledons; Gunneridae; Pentapetalae; rosids; malvids; Brassicales; Brassicaceae; Camelineae; Arabidopsis	0.162071	1.24116	0.372008	-0.751034	-0.72277	0.33704	2.25026	0.0958096	0.838247	0.671122	0.78287	0.746574	1.28737	0.640789	-3.22612	-1.49929	-3.22612
1	Nsylvestris_NODE_10388_length_2064_cov_12	.	1.44959	0.227198	0.227198	-0.357765	-1.35776	1.64224	2.50022	1.2272	-0.772802	1.2272	0.964163	-1.35776	-0.772802	1.2272	-2.35776	-2.35776	-1.35776
1	Nsylvestris_NODE_10389_length_2063_cov_232	GLYM2_ARATH^GLYM2_ARATH^Q:175-1665,H:21-517^88.129%ID^E:0^RecName: Full=Serine hydroxymethyltransferase 2, mitochondrial;^Eukaryota; Viridiplantae; Streptophyta; Embryophyta; Tracheophyta; Spermatophyta; Magnoliopsida; eudicotyledons; Gunneridae; Pentapetalae; rosids; malvids; Brassicales; Brassicaceae; Camelineae; Arabidopsis	0.390069	1.24502	1.02496	0.504713	1.21995	0.314421	1.87128	2.00893	0.709619	0.569839	0.343524	0.377629	1.30745	0.37529	-4.06924	-4.25986	-3.93359
1	Nsylvestris_NODE_1039_length_4890_cov_23	LORF2_HUMAN^LORF2_HUMAN^Q:2360-807,H:381-895^25.758%ID^E:5.99e-46^RecName: Full=LINE-1 retrotransposable element ORF2 protein;^Eukaryota; Metazoa; Chordata; Craniata; Vertebrata; Euteleostomi; Mammalia; Eutheria; Euarchontoglires; Primates; Haplorrhini; Catarrhini; Hominidae; Homo	-0.430997	0.516536	-0.430997	-0.238352	-1.431	0.971102	1.04705	-1.65339	2.69239	2.28521	2.22108	2.69239	2.26944	2.20459	-4.23835	-4.23835	-4.23835
1	Nsylvestris_NODE_10392_length_2063_cov_138	.	0.592242	0.722091	1.0519	-0.656662	0.654778	1.01519	1.66726	1.32813	1.66983	2.46304	0.221255	1.99015	0.511453	0.0175141	-3.64897	-4.29781	-5.30138
1	Nsylvestris_NODE_10393_length_2063_cov_97	IKU1_ARATH^IKU1_ARATH^Q:696-1235,H:1-178^52.356%ID^E:5.83e-29^RecName: Full=Protein HAIKU1 {ECO:0000305};^Eukaryota; Viridiplantae; Streptophyta; Embryophyta; Tracheophyta; Spermatophyta; Magnoliopsida; eudicotyledons; Gunneridae; Pentapetalae; rosids; malvids; Brassicales; Brassicaceae; Camelineae; Arabidopsis`IKU1_ARATH^IKU1_ARATH^Q:1476-1637,H:341-401^67.213%ID^E:2.64e-07^RecName: Full=Protein…	0.936948	1.36838	1.22706	-0.818475	1.54576	1.40164	1.07194	0.562925	1.70546	2.02387	0.110033	2.16261	1.6092	0.505187	-5.13751	-5.13751	-5.13751
1	Nsylvestris_NODE_10396_length_2062_cov_234	CSI1_ARATH^CSI1_ARATH^Q:1746-1,H:13-594^85.763%ID^E:0^RecName: Full=Protein CELLULOSE SYNTHASE INTERACTIVE 1 {ECO:0000303|PubMed:20616083};^Eukaryota; Viridiplantae; Streptophyta; Embryophyta; Tracheophyta; Spermatophyta; Magnoliopsida; eudicotyledons; Gunneridae; Pentapetalae; rosids; malvids; Brassicales; Brassicaceae; Camelineae; Arabidopsis	0.366969	1.60694	1.57938	0.924505	1.34668	0.889233	2.69332	1.41533	1.00168	0.646786	0.376462	0.925003	1.44087	0.323273	-4.77556	-5.9326	-4.82827
1	Nsylvestris_NODE_10398_length_2062_cov_171	LYK3_ARATH^LYK3_ARATH^Q:1993-89,H:21-651^65.474%ID^E:0^RecName: Full=LysM domain receptor-like kinase 3;^Eukaryota; Viridiplantae; Streptophyta; Embryophyta; Tracheophyta; Spermatophyta; Magnoliopsida; eudicotyledons; Gunneridae; Pentapetalae; rosids; malvids; Brassicales; Brassicaceae; Camelineae; Arabidopsis	-0.450496	0.398684	0.66975	-0.0858644	0.660761	1.42895	2.18878	1.18481	0.800952	0.0403558	-1.86351	0.0916315	-0.249921	-1.28667	-0.689983	-1.17283	-1.6654
1	Nsylvestris_NODE_10399_length_2062_cov_164	TRUA_RICCN^TRUA_RICCN^Q:1832-876,H:1-245^35.11%ID^E:1.44e-49^RecName: Full=tRNA pseudouridine synthase A {ECO:0000255|HAMAP-Rule:MF_00171};^Bacteria; Proteobacteria; Alphaproteobacteria; Rickettsiales; Rickettsiaceae; Rickettsieae; Rickettsia; spotted fever group	0.664136	0.864417	-0.806885	0.159439	0.600454	1.30187	2.81642	2.10979	0.839464	0.67004	0.35451	0.157133	0.382137	0.269525	-2.76692	-1.88689	-5.72865
1	Nsylvestris_NODE_104_length_8371_cov_45	POLX_TOBAC^POLX_TOBAC^Q:5584-7113,H:457-965^35.863%ID^E:0^RecName: Full=Retrovirus-related Pol polyprotein from transposon TNT 1-94;^Eukaryota; Viridiplantae; Streptophyta; Embryophyta; Tracheophyta; Spermatophyta; Magnoliopsida; eudicotyledons; Gunneridae; Pentapetalae; asterids; lamiids; Solanales; Solanaceae; Nicotianoideae; Nicotianeae; Nicotiana`POLX_TOBAC^POLX_TOBAC^Q:7092-8165,H:962-1325^3…	0.872119	0.963267	0.392951	-0.00758661	0.872119	0.807989	2.09002	1.27929	1.07648	0.774822	1.7915	1.12992	1.39295	0.518482	-4.65144	-4.65144	-4.65144
1	Nsylvestris_NODE_10400_length_2062_cov_120	RNHX1_ARATH^RNHX1_ARATH^Q:1389-1640,H:244-329^32.558%ID^E:8.34e-08^RecName: Full=Putative ribonuclease H protein At1g65750;^Eukaryota; Viridiplantae; Streptophyta; Embryophyta; Tracheophyta; Spermatophyta; Magnoliopsida; eudicotyledons; Gunneridae; Pentapetalae; rosids; malvids; Brassicales; Brassicaceae; Camelineae; Arabidopsis`RNHX1_ARATH^RNHX1_ARATH^Q:1019-1333,H:108-225^23.81%ID^E:8.34e-08^Re…	0.302962	0.544996	0.218097	0.129733	0.338007	1.47688	2.51509	1.80004	0.954893	0.710378	1.46048	1.01001	1.1102	0.616491	-3.86937	-3.86456	-5.45433
1	Nsylvestris_NODE_10404_length_2062_cov_17	.	1.34914	0.109441	0.818624	-0.181376	0.233661	0.970627	1.55559	0.818624	-0.543946	1.29255	0.970627	-0.351301	0.456054	-0.0293733	-2.3513	-3.3513	-1.76634
1	Nsylvestris_NODE_10405_length_2061_cov_219	SPNS2_ARATH^SPNS2_ARATH^Q:1691-258,H:32-483^68.828%ID^E:0^RecName: Full=Probable sphingolipid transporter spinster homolog 2;^Eukaryota; Viridiplantae; Streptophyta; Embryophyta; Tracheophyta; Spermatophyta; Magnoliopsida; eudicotyledons; Gunneridae; Pentapetalae; rosids; malvids; Brassicales; Brassicaceae; Camelineae; Arabidopsis	0.843954	0.929114	1.57997	-0.280648	1.16284	0.895603	2.13846	2.37242	0.364794	0.165035	0.289202	1.10703	2.3438	0.811952	-4.70095	-5.01129	-5.01129
1	Nsylvestris_NODE_10409_length_2061_cov_88	PCO2_ARATH^PCO2_ARATH^Q:1702-1052,H:33-235^59.361%ID^E:1.24e-82^RecName: Full=Plant cysteine oxidase 2 {ECO:0000303|PubMed:24599061};^Eukaryota; Viridiplantae; Streptophyta; Embryophyta; Tracheophyta; Spermatophyta; Magnoliopsida; eudicotyledons; Gunneridae; Pentapetalae; rosids; malvids; Brassicales; Brassicaceae; Camelineae; Arabidopsis	-0.965017	1.19388	0.252607	0.715898	0.801627	1.35246	1.74182	1.52923	1.36996	1.00638	1.18915	-0.494422	1.60188	-0.0204908	-3.66435	-2.94626	-4.66435
1	Nsylvestris_NODE_1041_length_4888_cov_33	LORF2_HUMAN^LORF2_HUMAN^Q:2076-4130,H:199-885^24.827%ID^E:8.51e-40^RecName: Full=LINE-1 retrotransposable element ORF2 protein;^Eukaryota; Metazoa; Chordata; Craniata; Vertebrata; Euteleostomi; Mammalia; Eutheria; Euarchontoglires; Primates; Haplorrhini; Catarrhini; Hominidae; Homo	1.48532	1.48532	0.779049	0.853049	1.28601	1.88867	2.31248	0.338476	-0.883916	0.990553	-0.146951	1.17498	-0.00944723	-1.14695	-3.46888	-3.46888	-3.46888
1	Nsylvestris_NODE_10411_length_2061_cov_55	FRS5_ARATH^FRS5_ARATH^Q:1188-883,H:72-178^47.664%ID^E:2.76e-06^RecName: Full=Protein FAR1-RELATED SEQUENCE 5;^Eukaryota; Viridiplantae; Streptophyta; Embryophyta; Tracheophyta; Spermatophyta; Magnoliopsida; eudicotyledons; Gunneridae; Pentapetalae; rosids; malvids; Brassicales; Brassicaceae; Camelineae; Arabidopsis	-0.643132	0.234155	0.1923	-0.209451	-0.642411	1.10153	1.60658	0.588407	0.826954	0.826954	0.810448	1.20057	0.907751	0.559223	-1.4159	-2.60257	-3.34141
1	Nsylvestris_NODE_10412_length_2061_cov_42	SAC3C_ARATH^SAC3C_ARATH^Q:1845-1690,H:62-113^67.308%ID^E:1.4e-07^RecName: Full=SAC3 family protein C {ECO:0000303|PubMed:19843313};^Eukaryota; Viridiplantae; Streptophyta; Embryophyta; Tracheophyta; Spermatophyta; Magnoliopsida; eudicotyledons; Gunneridae; Pentapetalae; rosids; malvids; Brassicales; Brassicaceae; Camelineae; Arabidopsis	0.499505	0.948725	0.635567	-0.1609	0.34606	1.08303	2.7611	1.84818	0.720456	0.449154	0.913101	0.876575	1.25566	1.05028	-4.40883	-4.40883	-4.40883
1	Nsylvestris_NODE_10416_length_2060_cov_216	UBP15_ARATH^UBP15_ARATH^Q:4-1647,H:373-869^63.291%ID^E:0^RecName: Full=Ubiquitin carboxyl-terminal hydrolase 15 {ECO:0000305};^Eukaryota; Viridiplantae; Streptophyta; Embryophyta; Tracheophyta; Spermatophyta; Magnoliopsida; eudicotyledons; Gunneridae; Pentapetalae; rosids; malvids; Brassicales; Brassicaceae; Camelineae; Arabidopsis	1.23106	1.51296	0.374644	0.0510717	0.915052	1.63403	2.47668	1.84058	0.730071	1.21145	0.935954	0.606373	0.646628	0.0359458	-5.06047	-4.05355	-5.08848
1	Nsylvestris_NODE_10418_length_2060_cov_114	ICP0_EHV1V^ICP0_EHV1V^Q:1732-1520,H:2-69^39.437%ID^E:4.74e-06^RecName: Full=E3 ubiquitin-protein ligase ICP0;^Viruses; Herpesvirales; Herpesviridae; Alphaherpesvirinae; Varicellovirus	1.41399	1.11452	0.648283	0.0496177	0.63294	0.698383	1.78953	1.19719	0.867471	0.96011	1.12529	0.353535	1.07834	0.353137	-4.82518	-3.67462	-3.78253
1	Nsylvestris_NODE_10419_length_2060_cov_31	RH35_ARATH^RH35_ARATH^Q:1026-1889,H:304-591^92.361%ID^E:0^RecName: Full=DEAD-box ATP-dependent RNA helicase 35;^Eukaryota; Viridiplantae; Streptophyta; Embryophyta; Tracheophyta; Spermatophyta; Magnoliopsida; eudicotyledons; Gunneridae; Pentapetalae; rosids; malvids; Brassicales; Brassicaceae; Camelineae; Arabidopsis`RH35_ARATH^RH35_ARATH^Q:716-1000,H:211-305^78.947%ID^E:0^RecName: Full=DEAD-box …	0.238228	0.500375	0.121863	-1.6151	-1.20006	1.78771	2.58129	1.19225	1.19225	-0.39271	0.799935	0.121863	2.3849	0.887398	-3.20006	-3.20006	-2.20006
1	Nsylvestris_NODE_10420_length_2060_cov_19	.	1.38465	-0.200313	0.0627218	-0.200313	0.799687	0.937191	2.00132	0.0627218	0.477759	0.0627218	0.647684	0.57537	0.477759	-0.522241	-1.52224	-2.52224	-2.52224
1	Nsylvestris_NODE_10421_length_2059_cov_217	NTF2_ARATH^NTF2_ARATH^Q:998-573,H:227-367^35.135%ID^E:1.18e-15^RecName: Full=Nuclear transport factor 2 {ECO:0000303|PubMed:28229965};^Eukaryota; Viridiplantae; Streptophyta; Embryophyta; Tracheophyta; Spermatophyta; Magnoliopsida; eudicotyledons; Gunneridae; Pentapetalae; rosids; malvids; Brassicales; Brassicaceae; Camelineae; Arabidopsis`NTF2_ARATH^NTF2_ARATH^Q:1796-1401,H:1-135^41.912%ID^E:5.1…	0.541172	0.85593	0.0745779	-0.0955642	0.54601	1.17621	1.93897	1.63213	0.534605	0.80999	0.0434102	0.553505	0.803389	0.404442	-3.02227	-3.55288	-3.24363
1	Nsylvestris_NODE_10422_length_2059_cov_215	MD15A_ARATH^MD15A_ARATH^Q:901-1161,H:21-109^67.416%ID^E:3.25e-29^RecName: Full=Mediator of RNA polymerase II transcription subunit 15a;^Eukaryota; Viridiplantae; Streptophyta; Embryophyta; Tracheophyta; Spermatophyta; Magnoliopsida; eudicotyledons; Gunneridae; Pentapetalae; rosids; malvids; Brassicales; Brassicaceae; Camelineae; Arabidopsis`MD15A_ARATH^MD15A_ARATH^Q:580-801,H:22-95^70.27%ID^E:9.9…	0.916364	0.876949	0.980125	-0.520259	0.200267	0.66846	1.54481	1.32585	1.18346	0.901124	1.42393	1.09243	0.956721	0.700194	-4.16124	-3.51057	-4.57863
1	Nsylvestris_NODE_10426_length_2059_cov_166	PP248_ARATH^PP248_ARATH^Q:146-1651,H:11-522^46.979%ID^E:1.28e-149^RecName: Full=Pentatricopeptide repeat-containing protein At3g22670, mitochondrial;^Eukaryota; Viridiplantae; Streptophyta; Embryophyta; Tracheophyta; Spermatophyta; Magnoliopsida; eudicotyledons; Gunneridae; Pentapetalae; rosids; malvids; Brassicales; Brassicaceae; Camelineae; Arabidopsis`PP248_ARATH^PP248_ARATH^Q:608-1456,H:276-5…	0.445637	0.629659	1.32637	0.172792	0.152167	0.909461	1.59076	1.74952	1.22253	0.766139	1.62869	0.572988	0.537241	0.106596	-2.73217	-5.43039	-3.64798
1	Nsylvestris_NODE_10427_length_2059_cov_164	Y3720_ARATH^Y3720_ARATH^Q:109-1119,H:59-370^25.706%ID^E:1.19e-15^RecName: Full=UPF0481 protein At3g47200;^Eukaryota; Viridiplantae; Streptophyta; Embryophyta; Tracheophyta; Spermatophyta; Magnoliopsida; eudicotyledons; Gunneridae; Pentapetalae; rosids; malvids; Brassicales; Brassicaceae; Camelineae; Arabidopsis	1.43723	-0.370121	2.48786	0.437234	1.71734	-0.0481927	2.7998	3.05614	1.21484	-0.0481927	1.53677	-2.37012	-2.37012	-2.37012	-2.37012	-2.37012	-2.37012
1	Nsylvestris_NODE_1043_length_4887_cov_110	MD19A_ARATH^MD19A_ARATH^Q:3498-3184,H:10-114^68.571%ID^E:1.37e-40^RecName: Full=Mediator of RNA polymerase II transcription subunit 19a;^Eukaryota; Viridiplantae; Streptophyta; Embryophyta; Tracheophyta; Spermatophyta; Magnoliopsida; eudicotyledons; Gunneridae; Pentapetalae; rosids; malvids; Brassicales; Brassicaceae; Camelineae; Arabidopsis	0.571615	0.685669	0.740223	0.156093	0.275361	1.18898	2.47388	0.871468	0.590714	0.724325	0.882234	0.751643	0.730296	0.223654	-3.72171	-3.19355	-3.95091
1	Nsylvestris_NODE_10430_length_2059_cov_114	MYBC1_ARATH^MYBC1_ARATH^Q:1580-945,H:1-204^58.065%ID^E:1.05e-52^RecName: Full=Transcription factor MYBC1 {ECO:0000305};^Eukaryota; Viridiplantae; Streptophyta; Embryophyta; Tracheophyta; Spermatophyta; Magnoliopsida; eudicotyledons; Gunneridae; Pentapetalae; rosids; malvids; Brassicales; Brassicaceae; Camelineae; Arabidopsis	1.40966	1.45635	-0.435073	0.23664	1.20459	2.07748	2.72878	1.63022	0.943233	1.03828	0.553932	0.595067	1.16283	0.967892	-5.18996	-5.18996	-5.18996
1	Nsylvestris_NODE_10431_length_2059_cov_94	PUB24_ARATH^PUB24_ARATH^Q:3-755,H:53-332^29.333%ID^E:2.85e-26^RecName: Full=E3 ubiquitin-protein ligase PUB24;^Eukaryota; Viridiplantae; Streptophyta; Embryophyta; Tracheophyta; Spermatophyta; Magnoliopsida; eudicotyledons; Gunneridae; Pentapetalae; rosids; malvids; Brassicales; Brassicaceae; Camelineae; Arabidopsis	0.340296	1.6221	0.562688	0.537143	0.195906	0.340296	2.1179	1.72934	-0.228272	-1.95779	1.03544	1.18829	0.637278	0.0354412	-2.05202	-2.05202	-4.05202
1	Nsylvestris_NODE_10434_length_2058_cov_208	VPS9A_ARATH^VPS9A_ARATH^Q:1729-434,H:1-423^61.239%ID^E:2.59e-166^RecName: Full=Vacuolar protein sorting-associated protein 9A {ECO:0000305};^Eukaryota; Viridiplantae; Streptophyta; Embryophyta; Tracheophyta; Spermatophyta; Magnoliopsida; eudicotyledons; Gunneridae; Pentapetalae; rosids; malvids; Brassicales; Brassicaceae; Camelineae; Arabidopsis	0.95101	1.40277	0.567502	0.198225	0.90964	0.808149	1.61001	1.26529	0.595436	0.538783	0.0625201	0.416168	0.870909	0.038649	-2.88296	-2.72464	-4.62746
1	Nsylvestris_NODE_10437_length_2057_cov_151	KELP_ARATH^KELP_ARATH^Q:195-662,H:13-164^63.462%ID^E:3.15e-50^RecName: Full=RNA polymerase II transcriptional coactivator KELP;^Eukaryota; Viridiplantae; Streptophyta; Embryophyta; Tracheophyta; Spermatophyta; Magnoliopsida; eudicotyledons; Gunneridae; Pentapetalae; rosids; malvids; Brassicales; Brassicaceae; Camelineae; Arabidopsis	0.71238	0.575915	0.362445	0.0470633	-0.0214632	1.34498	2.44345	1.34088	0.398886	0.516772	0.151888	0.29618	0.836928	0.398335	-3.29378	-3.16063	-2.95023
1	Nsylvestris_NODE_10439_length_2058_cov_63	.	1.37319	1.30766	-0.143932	0.324322	0.985307	1.58736	1.99071	1.11429	1.37517	1.03915	1.15672	0.440515	1.55631	0.748638	-4.9518	-4.9518	-4.9518
1	Nsylvestris_NODE_1044_length_4886_cov_109	MLH3_ARATH^MLH3_ARATH^Q:2319-1039,H:752-1155^51.044%ID^E:1.6e-122^RecName: Full=DNA mismatch repair protein MLH3;^Eukaryota; Viridiplantae; Streptophyta; Embryophyta; Tracheophyta; Spermatophyta; Magnoliopsida; eudicotyledons; Gunneridae; Pentapetalae; rosids; malvids; Brassicales; Brassicaceae; Camelineae; Arabidopsis`MLH3_ARATH^MLH3_ARATH^Q:4617-3601,H:1-309^50.147%ID^E:4.54e-91^RecName: Full=D…	1.09976	0.89753	0.298484	-0.553682	-0.116831	1.85103	2.3806	1.19987	1.17515	1.25496	1.45119	0.280895	1.33992	0.869785	-4.81672	-4.81672	-3.79524
1	Nsylvestris_NODE_10440_length_2058_cov_33	.	0.235601	-0.249826	0.091211	-0.0692537	0.091211	0.165212	1.26955	0.428246	0.428246	0.887678	0.366845	0.165212	0.543723	0.302715	-1.83479	-1.83479	-0.986791
1	Nsylvestris_NODE_10442_length_2057_cov_225	APY2_ARATH^APY2_ARATH^Q:350-1735,H:5-471^68.094%ID^E:0^RecName: Full=Apyrase 2;^Eukaryota; Viridiplantae; Streptophyta; Embryophyta; Tracheophyta; Spermatophyta; Magnoliopsida; eudicotyledons; Gunneridae; Pentapetalae; rosids; malvids; Brassicales; Brassicaceae; Camelineae; Arabidopsis	0.36604	1.15907	0.603869	0.410117	0.999533	2.00766	2.71412	2.08813	0.491851	0.810052	-0.288719	0.526154	0.899607	-0.0734817	-3.95822	-4.54207	-4.21372
1	Nsylvestris_NODE_10444_length_2057_cov_191	NCL_ARATH^NCL_ARATH^Q:184-1830,H:20-585^65.901%ID^E:0^RecName: Full=Sodium/calcium exchanger NCL {ECO:0000305};^Eukaryota; Viridiplantae; Streptophyta; Embryophyta; Tracheophyta; Spermatophyta; Magnoliopsida; eudicotyledons; Gunneridae; Pentapetalae; rosids; malvids; Brassicales; Brassicaceae; Camelineae; Arabidopsis	-0.432623	0.664479	-1.1739	0.187265	0.724337	2.50502	3.13105	2.38296	0.582449	0.630775	0.164817	-0.154795	-0.442759	-1.75231	-3.47072	-1.33028	-2.21577
1	Nsylvestris_NODE_10448_length_2057_cov_108	.	0.348727	0.0524168	0.315451	0.367919	0.144624	0.935603	2.34481	0.438308	-0.0111599	-0.0125006	0.0199954	0.846521	0.90166	0.259616	-1.98	-2.11751	-2.85447
1	Nsylvestris_NODE_1045_length_4884_cov_135	KIPK1_ARATH^KIPK1_ARATH^Q:1768-320,H:445-934^63.34%ID^E:1.67e-179^RecName: Full=Serine/threonine-protein kinase KIPK1 {ECO:0000305};^Eukaryota; Viridiplantae; Streptophyta; Embryophyta; Tracheophyta; Spermatophyta; Magnoliopsida; eudicotyledons; Gunneridae; Pentapetalae; rosids; malvids; Brassicales; Brassicaceae; Camelineae; Arabidopsis`KIPK1_ARATH^KIPK1_ARATH^Q:2878-2411,H:1-192^27.411%ID^E:7.1…	0.808516	0.94004	0.818807	-0.0396506	0.371776	0.439449	1.7882	1.26181	0.677201	0.486983	0.717012	0.378482	0.669951	0.00259913	-3.93088	-3.13022	-2.26008
1	Nsylvestris_NODE_10450_length_2057_cov_27	DNJB4_PONAB^DNJB4_PONAB^Q:1613-645,H:1-334^42.56%ID^E:2.88e-76^RecName: Full=DnaJ homolog subfamily B member 4;^Eukaryota; Metazoa; Chordata; Craniata; Vertebrata; Euteleostomi; Mammalia; Eutheria; Euarchontoglires; Primates; Haplorrhini; Catarrhini; Hominidae; Pongo	-0.152188	0.917046	1.06807	-1.10266	0.616527	1.42091	1.48231	0.219272	1.06727	0.804234	0.481103	0.703668	2.50379	-0.721373	-3.10266	-3.10266	-3.10266
1	Nsylvestris_NODE_10451_length_2057_cov_24	.	0.460396	0.777668	0.695755	-0.382248	0.769034	0.530189	1.61655	1.25518	0.808191	1.17411	0.665833	0.382344	1.63092	0.272595	-3.55217	-3.55217	-3.55217
1	Nsylvestris_NODE_10456_length_2056_cov_18	PP386_ARATH^PP386_ARATH^Q:2027-180,H:10-623^57.235%ID^E:0^RecName: Full=Pentatricopeptide repeat-containing protein At5g15340, mitochondrial;^Eukaryota; Viridiplantae; Streptophyta; Embryophyta; Tracheophyta; Spermatophyta; Magnoliopsida; eudicotyledons; Gunneridae; Pentapetalae; rosids; malvids; Brassicales; Brassicaceae; Camelineae; Arabidopsis	1.09388	1.60565	0.499856	-0.473126	-0.544453	1.48891	1.79703	0.418517	0.579437	0.473712	-0.572853	1.66279	-1.10018	-2.90341	-1.68929	-0.628404	-1.70806
1	Nsylvestris_NODE_1046_length_4885_cov_87	POLR1_ARATH^POLR1_ARATH^Q:4055-4522,H:1194-1349^41.667%ID^E:2.3e-91^RecName: Full=Retrovirus-related Pol polyprotein from transposon RE1;^Eukaryota; Viridiplantae; Streptophyta; Embryophyta; Tracheophyta; Spermatophyta; Magnoliopsida; eudicotyledons; Gunneridae; Pentapetalae; rosids; malvids; Brassicales; Brassicaceae; Camelineae; Arabidopsis`POLR1_ARATH^POLR1_ARATH^Q:3645-4049,H:1057-1191^52.593…	0.980422	0.718043	-0.442414	-0.113369	1.06741	0.759154	1.99162	1.23364	1.13185	0.820365	0.0773526	0.27616	1.19191	0.186934	-3.42646	-2.18672	-4.26591
1	Nsylvestris_NODE_10460_length_2055_cov_118	PLI2B_ARATH^PLI2B_ARATH^Q:281-832,H:1-183^72.826%ID^E:1.47e-94^RecName: Full=LIM domain-containing protein PLIM2b {ECO:0000305};^Eukaryota; Viridiplantae; Streptophyta; Embryophyta; Tracheophyta; Spermatophyta; Magnoliopsida; eudicotyledons; Gunneridae; Pentapetalae; rosids; malvids; Brassicales; Brassicaceae; Camelineae; Arabidopsis`PLI2B_ARATH^PLI2B_ARATH^Q:572-835,H:3-90^46.591%ID^E:1.25e-18^R…	0.721394	-0.815277	1.88946	-0.397604	0.892046	-2.58822	-0.266291	1.57125	0.686416	0.480882	3.36958	-0.780864	4.83397	-0.106016	-2.97941	-3.57386	-2.93745
1	Nsylvestris_NODE_10462_length_2055_cov_56	PPD7_ARATH^PPD7_ARATH^Q:1346-1873,H:106-280^70.225%ID^E:5.98e-77^RecName: Full=PsbP domain-containing protein 7, chloroplastic;^Eukaryota; Viridiplantae; Streptophyta; Embryophyta; Tracheophyta; Spermatophyta; Magnoliopsida; eudicotyledons; Gunneridae; Pentapetalae; rosids; malvids; Brassicales; Brassicaceae; Camelineae; Arabidopsis`PPD7_ARATH^PPD7_ARATH^Q:592-924,H:11-113^45.045%ID^E:3.39e-22^Re…	-0.489992	0.625135	-1.14728	-0.932083	-0.354007	0.898057	2.13093	1.75049	0.611767	0.348025	-0.280006	0.614591	-1.58563	-0.811541	-0.345747	-0.675935	-0.35677
1	Nsylvestris_NODE_10463_length_2055_cov_50	OFT29_ARATH^OFT29_ARATH^Q:655-1650,H:178-509^79.217%ID^E:0^RecName: Full=O-fucosyltransferase 29 {ECO:0000305};^Eukaryota; Viridiplantae; Streptophyta; Embryophyta; Tracheophyta; Spermatophyta; Magnoliopsida; eudicotyledons; Gunneridae; Pentapetalae; rosids; malvids; Brassicales; Brassicaceae; Camelineae; Arabidopsis`OFT29_ARATH^OFT29_ARATH^Q:377-628,H:82-167^75.581%ID^E:0^RecName: Full=O-fucosyl…	-0.456414	-0.01854	0.0924381	-0.70641	-0.215157	1.99504	2.89268	1.50315	0.423644	0.689025	-0.865197	0.818995	0.349922	-0.0987514	-1.3629	-3.92495	-1.11657
1	Nsylvestris_NODE_10464_length_2055_cov_38	JM706_ORYSJ^JM706_ORYSJ^Q:61-1536,H:83-584^53.386%ID^E:0^RecName: Full=Lysine-specific demethylase JMJ706;^Eukaryota; Viridiplantae; Streptophyta; Embryophyta; Tracheophyta; Spermatophyta; Magnoliopsida; Liliopsida; Poales; Poaceae; BOP clade; Oryzoideae; Oryzeae; Oryzinae; Oryza; Oryza sativa	0.75471	1.01774	1.24014	1.13322	0.0177444	1.68071	2.24014	1.68071	0.0177444	-0.982256	0.432782	0.602707	-0.567218	-1.56722	-2.56722	-2.56722	-2.56722
1	Nsylvestris_NODE_10465_length_2055_cov_29	BBE21_ARATH^BBE21_ARATH^Q:1808-309,H:35-535^57.738%ID^E:0^RecName: Full=Berberine bridge enzyme-like 21 {ECO:0000303|PubMed:26037923};^Eukaryota; Viridiplantae; Streptophyta; Embryophyta; Tracheophyta; Spermatophyta; Magnoliopsida; eudicotyledons; Gunneridae; Pentapetalae; rosids; malvids; Brassicales; Brassicaceae; Camelineae; Arabidopsis	-0.695963	-0.457097	1.12064	-0.399305	0.331605	0.497986	1.52212	1.42201	-0.750321	-0.527585	0.667123	1.46569	0.441119	0.123929	-2.3114	-1.73356	-0.71699
1	Nsylvestris_NODE_10469_length_2054_cov_107	FRIGI_ARATH^FRIGI_ARATH^Q:466-1392,H:148-459^43.131%ID^E:5.22e-80^RecName: Full=Protein FRIGIDA {ECO:0000303|PubMed:11030654};^Eukaryota; Viridiplantae; Streptophyta; Embryophyta; Tracheophyta; Spermatophyta; Magnoliopsida; eudicotyledons; Gunneridae; Pentapetalae; rosids; malvids; Brassicales; Brassicaceae; Camelineae; Arabidopsis	-0.196467	0.285633	0.262371	0.0230077	0.633786	0.513108	1.0942	-0.0202097	0.0896042	0.532069	0.150056	0.164107	0.480176	0.361451	-1.10096	-1.66639	-1.60553
1	Nsylvestris_NODE_1047_length_4880_cov_146	XPOT_ARATH^XPOT_ARATH^Q:4511-1545,H:1-988^74.115%ID^E:0^RecName: Full=Exportin-T;^Eukaryota; Viridiplantae; Streptophyta; Embryophyta; Tracheophyta; Spermatophyta; Magnoliopsida; eudicotyledons; Gunneridae; Pentapetalae; rosids; malvids; Brassicales; Brassicaceae; Camelineae; Arabidopsis	0.0668355	1.11563	0.493402	0.355768	0.160208	1.41283	2.14828	0.809367	0.809263	1.02086	0.910363	0.885123	0.692151	0.292381	-3.54682	-4.08739	-3.53826
1	Nsylvestris_NODE_10471_length_2054_cov_36	PPR85_ARATH^PPR85_ARATH^Q:36-1820,H:33-638^62.438%ID^E:0^RecName: Full=Pentatricopeptide repeat-containing protein At1g59720, chloroplastic/mitochondrial {ECO:0000305};^Eukaryota; Viridiplantae; Streptophyta; Embryophyta; Tracheophyta; Spermatophyta; Magnoliopsida; eudicotyledons; Gunneridae; Pentapetalae; rosids; malvids; Brassicales; Brassicaceae; Camelineae; Arabidopsis	-1.181	1.84137	-0.2058	0.142242	-0.316698	2.23609	2.03905	0.38194	0.968381	0.490914	0.453385	1.93095	0.254389	0.920287	-3.3185	-3.3185	-3.3185
1	Nsylvestris_NODE_10472_length_2053_cov_232	Y1341_ORYSJ^Y1341_ORYSJ^Q:1525-275,H:88-495^34.118%ID^E:8.06e-77^RecName: Full=B3 domain-containing protein Os01g0234100;^Eukaryota; Viridiplantae; Streptophyta; Embryophyta; Tracheophyta; Spermatophyta; Magnoliopsida; Liliopsida; Poales; Poaceae; BOP clade; Oryzoideae; Oryzeae; Oryzinae; Oryza; Oryza sativa	0.21053	0.749447	0.418793	-0.169303	0.215005	0.387523	1.36638	0.814353	0.497263	0.5853	0.608797	0.53431	0.417758	0.00744041	-1.94832	-2.80322	-1.89206
1	Nsylvestris_NODE_10474_length_2053_cov_225	VPS4_ARATH^VPS4_ARATH^Q:355-1638,H:1-429^83.759%ID^E:0^RecName: Full=Protein SUPPRESSOR OF K(+) TRANSPORT GROWTH DEFECT 1 {ECO:0000303|PubMed:17468262};^Eukaryota; Viridiplantae; Streptophyta; Embryophyta; Tracheophyta; Spermatophyta; Magnoliopsida; eudicotyledons; Gunneridae; Pentapetalae; rosids; malvids; Brassicales; Brassicaceae; Camelineae; Arabidopsis	0.248441	-0.0949749	-0.329778	-1.12387	-0.296468	0.351921	1.66208	0.980259	1.28249	0.891911	0.550555	0.647275	1.37107	0.558788	-2.57205	-1.41665	-2.71099
1	Nsylvestris_NODE_10476_length_2053_cov_200	ASHH1_ARATH^ASHH1_ARATH^Q:1758-421,H:13-463^59.121%ID^E:8.86e-179^RecName: Full=Histone-lysine N-methyltransferase ASHH1 {ECO:0000305};^Eukaryota; Viridiplantae; Streptophyta; Embryophyta; Tracheophyta; Spermatophyta; Magnoliopsida; eudicotyledons; Gunneridae; Pentapetalae; rosids; malvids; Brassicales; Brassicaceae; Camelineae; Arabidopsis	-0.161787	0.313067	-0.00631561	-0.3072	-0.28132	1.29931	1.82944	0.650876	1.11426	1.29	0.86368	1.20256	0.624141	-0.161509	-2.14522	-2.76295	-3.36103
1	Nsylvestris_NODE_10477_length_2053_cov_161	CYT5_ARATH^CYT5_ARATH^Q:1562-1813,H:31-114^63.095%ID^E:1.33e-29^RecName: Full=Cysteine proteinase inhibitor 5;^Eukaryota; Viridiplantae; Streptophyta; Embryophyta; Tracheophyta; Spermatophyta; Magnoliopsida; eudicotyledons; Gunneridae; Pentapetalae; rosids; malvids; Brassicales; Brassicaceae; Camelineae; Arabidopsis	0.93823	0.58618	-0.267077	0.105676	0.147296	1.18898	2.05524	0.876689	0.400714	0.775146	0.334486	-0.358635	1.04771	0.15263	-2.89628	-2.71413	-2.37285
1	Nsylvestris_NODE_10478_length_2053_cov_148	FBK50_ARATH^FBK50_ARATH^Q:1745-606,H:11-421^29.04%ID^E:9.31e-33^RecName: Full=F-box/kelch-repeat protein At3g06240;^Eukaryota; Viridiplantae; Streptophyta; Embryophyta; Tracheophyta; Spermatophyta; Magnoliopsida; eudicotyledons; Gunneridae; Pentapetalae; rosids; malvids; Brassicales; Brassicaceae; Camelineae; Arabidopsis	1.32531	0.0472355	0.762399	-0.592863	-0.243769	0.0776442	1.77402	1.93386	1.53663	2.44932	2.69447	0.64658	1.58354	1.16054	-5.05164	-5.05164	-5.05164
1	Nsylvestris_NODE_1048_length_4882_cov_42	MOM1_ARATH^MOM1_ARATH^Q:3000-1732,H:416-827^35.897%ID^E:1.21e-59^RecName: Full=Helicase protein MOM1;^Eukaryota; Viridiplantae; Streptophyta; Embryophyta; Tracheophyta; Spermatophyta; Magnoliopsida; eudicotyledons; Gunneridae; Pentapetalae; rosids; malvids; Brassicales; Brassicaceae; Camelineae; Arabidopsis	1.24533	0.663648	0.880649	-1.15645	-0.236708	1.38249	1.4787	1.38249	-0.23518	-0.354479	1.26057	0.563644	1.52856	-0.0586547	-2.36446	-3.47549	-2.50464
1	Nsylvestris_NODE_10480_length_2053_cov_45	Y3210_ARATH^Y3210_ARATH^Q:291-1844,H:1-483^46.449%ID^E:9.64e-133^RecName: Full=BTB/POZ domain-containing protein At3g22104;^Eukaryota; Viridiplantae; Streptophyta; Embryophyta; Tracheophyta; Spermatophyta; Magnoliopsida; eudicotyledons; Gunneridae; Pentapetalae; rosids; malvids; Brassicales; Brassicaceae; Camelineae; Arabidopsis	0.364944	0.707714	0.425887	0.0678227	1.26907	0.261217	1.38675	1.1941	1.01202	1.71204	-0.876286	0.166358	1.10484	0.798175	-3.19821	-3.19821	-3.19821
1	Nsylvestris_NODE_10482_length_2052_cov_219	.	0.204304	0.511008	0.310489	-0.120851	0.824143	1.50803	2.46439	1.63646	0.541573	0.362758	-0.198441	0.449288	0.931116	0.301134	-3.26941	-2.90775	-3.54824
1	Nsylvestris_NODE_10484_length_2052_cov_194	RSH1L_ARATH^RSH1L_ARATH^Q:3-1502,H:384-883^70.179%ID^E:0^RecName: Full=Putative GTP diphosphokinase RSH1, chloroplastic;^Eukaryota; Viridiplantae; Streptophyta; Embryophyta; Tracheophyta; Spermatophyta; Magnoliopsida; eudicotyledons; Gunneridae; Pentapetalae; rosids; malvids; Brassicales; Brassicaceae; Camelineae; Arabidopsis	-0.0667451	0.530917	-0.246237	-1.13445	-0.860041	0.550213	1.45431	0.852208	1.76356	1.76163	2.19108	1.83271	2.32768	1.8814	-3.6469	-4.51381	-4.67753
1	Nsylvestris_NODE_10486_length_2052_cov_139	PPIL3_CHICK^PPIL3_CHICK^Q:1302-1781,H:3-161^28.07%ID^E:4.5e-10^RecName: Full=Peptidyl-prolyl cis-trans isomerase-like 3;^Eukaryota; Metazoa; Chordata; Craniata; Vertebrata; Euteleostomi; Archelosauria; Archosauria; Dinosauria; Saurischia; Theropoda; Coelurosauria; Aves; Neognathae; Galloanserae; Galliformes; Phasianidae; Phasianinae; Gallus	0.757306	0.651183	0.568471	0.18231	0.80674	1.38266	2.03698	1.48003	1.24235	1.1297	1.41966	0.52418	1.71513	0.931247	-6.20605	-4.55989	-4.06201
1	Nsylvestris_NODE_10488_length_2052_cov_70	STP14_ARATH^STP14_ARATH^Q:1686-238,H:16-498^78.261%ID^E:0^RecName: Full=Sugar transport protein 14;^Eukaryota; Viridiplantae; Streptophyta; Embryophyta; Tracheophyta; Spermatophyta; Magnoliopsida; eudicotyledons; Gunneridae; Pentapetalae; rosids; malvids; Brassicales; Brassicaceae; Camelineae; Arabidopsis	-0.535921	-0.0668632	1.40796	0.16013	1.45404	1.32349	1.75959	0.741286	1.28827	0.401138	-0.573355	1.25884	1.50843	1.16487	-3.76397	-3.76397	-3.76397
1	Nsylvestris_NODE_10489_length_2052_cov_56	.	1.46045	1.03596	-0.511532	-0.305081	-0.75254	0.788029	1.93717	0.832423	0.180346	0.180346	1.07343	-1.40462	0.431885	1.14558	-1.25406	-2.21558	-2.62221
1	Nsylvestris_NODE_1049_length_4881_cov_21	LORF2_HUMAN^LORF2_HUMAN^Q:2656-755,H:284-888^24.545%ID^E:6.67e-46^RecName: Full=LINE-1 retrotransposable element ORF2 protein;^Eukaryota; Metazoa; Chordata; Craniata; Vertebrata; Euteleostomi; Mammalia; Eutheria; Euarchontoglires; Primates; Haplorrhini; Catarrhini; Hominidae; Homo	0.959329	0.752878	0.51187	-0.140207	0.859793	0.859793	1.95933	0.052438	-0.362599	0.859793	0.637401	0.51187	2.00663	-0.625634	-2.94756	-2.94756	-2.94756
1	Nsylvestris_NODE_10491_length_2051_cov_179	BLH9_ARATH^BLH9_ARATH^Q:1375-116,H:154-575^51.826%ID^E:6.22e-101^RecName: Full=BEL1-like homeodomain protein 9;^Eukaryota; Viridiplantae; Streptophyta; Embryophyta; Tracheophyta; Spermatophyta; Magnoliopsida; eudicotyledons; Gunneridae; Pentapetalae; rosids; malvids; Brassicales; Brassicaceae; Camelineae; Arabidopsis	0.695508	1.25727	-0.124164	-0.516023	0.706369	1.51372	1.62693	0.706369	1.06874	0.290988	0.844107	0.636431	0.220942	-0.853058	-2.77906	-2.77906	-2.51602
1	Nsylvestris_NODE_10492_length_2051_cov_156	KAN2_ARATH^KAN2_ARATH^Q:1074-448,H:191-386^61.905%ID^E:5.62e-63^RecName: Full=Probable transcription factor KAN2;^Eukaryota; Viridiplantae; Streptophyta; Embryophyta; Tracheophyta; Spermatophyta; Magnoliopsida; eudicotyledons; Gunneridae; Pentapetalae; rosids; malvids; Brassicales; Brassicaceae; Camelineae; Arabidopsis`KAN2_ARATH^KAN2_ARATH^Q:1662-1516,H:1-50^72.549%ID^E:3.36e-12^RecName: Full=Pr…	0.498658	1.35811	0.689316	0.171956	0.377496	0.830539	1.39125	0.718065	-0.322265	0.368581	-0.403926	0.15189	0.426997	-0.170182	-1.46105	-2.49862	-2.12682
1	Nsylvestris_NODE_10493_length_2050_cov_148	Y1926_ARATH^Y1926_ARATH^Q:1895-1437,H:7-158^66.667%ID^E:2.21e-63^RecName: Full=UPF0678 fatty acid-binding protein-like protein At1g79260;^Eukaryota; Viridiplantae; Streptophyta; Embryophyta; Tracheophyta; Spermatophyta; Magnoliopsida; eudicotyledons; Gunneridae; Pentapetalae; rosids; malvids; Brassicales; Brassicaceae; Camelineae; Arabidopsis	0.68902	0.5014	0.0100012	-0.784699	-0.840166	0.165327	1.68708	2.16903	0.479141	-0.0285071	1.42242	0.607331	1.78364	0.965752	-3.18659	-1.87921	-3.76098
1	Nsylvestris_NODE_10494_length_2051_cov_93	.	0.69295	0.529967	0.973574	0.640998	0.721024	0.693466	2.27843	1.61321	0.529967	0.390731	0.950476	1.1979	-0.161556	0.247879	-3.07124	-4.11389	-4.11389
1	Nsylvestris_NODE_10496_length_2051_cov_87	HDA15_ARATH^HDA15_ARATH^Q:576-310,H:462-550^38.889%ID^E:7.56e-09^RecName: Full=Histone deacetylase 15;^Eukaryota; Viridiplantae; Streptophyta; Embryophyta; Tracheophyta; Spermatophyta; Magnoliopsida; eudicotyledons; Gunneridae; Pentapetalae; rosids; malvids; Brassicales; Brassicaceae; Camelineae; Arabidopsis	0.466404	0.269727	0.94703	0.249593	0.344833	1.45799	1.99439	1.68234	0.530549	0.343007	0.529907	-0.00776004	0.753973	0.361346	-3.6009	-2.77399	-3.54843
1	Nsylvestris_NODE_10499_length_2051_cov_30	.	0.809496	0.395661	-0.383149	-0.383149	-0.383149	-0.383149	1.71639	0.394459	0.616851	1.20181	1.76369	0.509936	0.979421	0.716387	-3.1905	-1.1905	-3.1905
1	Nsylvestris_NODE_1050_length_4878_cov_96	PD5BB_XENLA^PD5BB_XENLA^Q:1804-1298,H:63-233^30.994%ID^E:1.04e-19^RecName: Full=Sister chromatid cohesion protein PDS5 homolog B-B;^Eukaryota; Metazoa; Chordata; Craniata; Vertebrata; Euteleostomi; Amphibia; Batrachia; Anura; Pipoidea; Pipidae; Xenopodinae; Xenopus; Xenopus	0.302356	0.6569	0.195402	-0.266534	-0.15155	-0.192571	0.941112	0.0544125	0.777895	0.568441	0.870936	1.13265	0.553335	-0.184701	-1.25788	-1.48679	-2.51342
1	Nsylvestris_NODE_10500_length_2051_cov_12	YTX2_XENLA^YTX2_XENLA^Q:735-2048,H:136-578^24.684%ID^E:2.33e-29^RecName: Full=Transposon TX1 uncharacterized 149 kDa protein;^Eukaryota; Metazoa; Chordata; Craniata; Vertebrata; Euteleostomi; Amphibia; Batrachia; Anura; Pipoidea; Pipidae; Xenopodinae; Xenopus; Xenopus	-1.05344	0.268486	-0.46848	-2.05344	1.53152	1.26849	1.53152	-0.0534423	2.11648	1.94656	1.11648	0.53152	-0.0534423	-0.46848	-2.05344	-2.05344	-2.05344
1	Nsylvestris_NODE_10503_length_2050_cov_79	Y4423_ARATH^Y4423_ARATH^Q:1827-1483,H:248-362^73.043%ID^E:1.15e-42^RecName: Full=DUF21 domain-containing protein At4g14230;^Eukaryota; Viridiplantae; Streptophyta; Embryophyta; Tracheophyta; Spermatophyta; Magnoliopsida; eudicotyledons; Gunneridae; Pentapetalae; rosids; malvids; Brassicales; Brassicaceae; Camelineae; Arabidopsis	2.65851	2.15967	2.37596	1.25121	1.46501	1.97508	2.59837	3.09734	-0.201711	-2.05543	-0.113968	-1.21607	0.380074	-1.21607	-4.38599	-4.38599	-4.38599
1	Nsylvestris_NODE_10504_length_2050_cov_57	.	0.549553	0.699249	0.446791	-0.591471	-0.0857037	0.23849	1.93812	2.1005	0.219225	0.268628	0.35354	0.820225	1.69123	-0.24978	-2.29612	-2.72795	-3.37452
1	Nsylvestris_NODE_10509_length_2049_cov_198	FKB53_ARATH^FKB53_ARATH^Q:1903-410,H:4-477^41.176%ID^E:1.77e-95^RecName: Full=Peptidyl-prolyl cis-trans isomerase FKBP53;^Eukaryota; Viridiplantae; Streptophyta; Embryophyta; Tracheophyta; Spermatophyta; Magnoliopsida; eudicotyledons; Gunneridae; Pentapetalae; rosids; malvids; Brassicales; Brassicaceae; Camelineae; Arabidopsis	0.0982236	0.612452	1.88452	0.325538	0.298757	2.36145	2.63562	0.75602	0.308137	1.07877	0.74871	0.433436	0.00704571	-0.221405	-4.48812	-3.3919	-3.44725
1	Nsylvestris_NODE_10511_length_2049_cov_144	SAMC1_ARATH^SAMC1_ARATH^Q:1088-360,H:82-324^81.481%ID^E:1.4e-138^RecName: Full=S-adenosylmethionine carrier 1, chloroplastic/mitochondrial;^Eukaryota; Viridiplantae; Streptophyta; Embryophyta; Tracheophyta; Spermatophyta; Magnoliopsida; eudicotyledons; Gunneridae; Pentapetalae; rosids; malvids; Brassicales; Brassicaceae; Camelineae; Arabidopsis`SAMC1_ARATH^SAMC1_ARATH^Q:1835-1593,H:1-83^66.265%ID…	0.772941	1.15482	0.667929	0.00851667	0.436574	1.64209	2.55245	1.86696	0.215651	1.00338	1.54801	0.65179	0.752477	0.925261	-4.73295	-4.73295	-4.73295
1	Nsylvestris_NODE_10512_length_2049_cov_112	GLR33_ARATH^GLR33_ARATH^Q:1117-308,H:620-892^70.758%ID^E:5.92e-115^RecName: Full=Glutamate receptor 3.3;^Eukaryota; Viridiplantae; Streptophyta; Embryophyta; Tracheophyta; Spermatophyta; Magnoliopsida; eudicotyledons; Gunneridae; Pentapetalae; rosids; malvids; Brassicales; Brassicaceae; Camelineae; Arabidopsis	1.31463	0.882968	0.321252	0.332094	1.14407	0.59898	2.19512	1.04188	0.231869	0.642558	1.01161	1.03218	1.0583	1.04329	-3.06505	-4.89287	-4.89287
1	Nsylvestris_NODE_10515_length_2049_cov_72	CML30_ARATH^CML30_ARATH^Q:923-402,H:1-178^50.838%ID^E:2.16e-57^RecName: Full=Calmodulin-like protein 30 {ECO:0000303|Ref.4};^Eukaryota; Viridiplantae; Streptophyta; Embryophyta; Tracheophyta; Spermatophyta; Magnoliopsida; eudicotyledons; Gunneridae; Pentapetalae; rosids; malvids; Brassicales; Brassicaceae; Camelineae; Arabidopsis	-0.023283	-0.0973026	0.587778	-0.141258	0.527486	1.56252	2.50746	2.01279	0.788138	0.871604	0.612136	0.36802	0.548997	0.715629	-3.75509	-3.74078	-3.34485
1	Nsylvestris_NODE_10516_length_2049_cov_62	.	0.580382	0.454638	0.227632	-0.721999	0.618076	0.82958	1.92474	1.07059	0.277039	1.16404	1.48431	-0.0460915	0.860398	0.996296	-3.04489	-3.04489	-3.62985
1	Nsylvestris_NODE_1052_length_4875_cov_217	ALA4_ARATH^ALA4_ARATH^Q:933-4508,H:1-1188^73.389%ID^E:0^RecName: Full=Probable phospholipid-transporting ATPase 4 {ECO:0000303|PubMed:11402198};^Eukaryota; Viridiplantae; Streptophyta; Embryophyta; Tracheophyta; Spermatophyta; Magnoliopsida; eudicotyledons; Gunneridae; Pentapetalae; rosids; malvids; Brassicales; Brassicaceae; Camelineae; Arabidopsis	-0.0376746	-0.23265	0.99307	-0.188433	0.0740358	0.530893	1.57037	1.70448	0.922556	3.5241e-05	2.03872	0.171999	4.11803	0.485887	-2.42846	-4.86142	-4.86142
1	Nsylvestris_NODE_10521_length_2048_cov_164	C76B6_CATRO^C76B6_CATRO^Q:1841-378,H:1-483^60.941%ID^E:0^RecName: Full=Geraniol 8-hydroxylase;^Eukaryota; Viridiplantae; Streptophyta; Embryophyta; Tracheophyta; Spermatophyta; Magnoliopsida; eudicotyledons; Gunneridae; Pentapetalae; asterids; lamiids; Gentianales; Apocynaceae; Rauvolfioideae; Vinceae; Catharanthinae; Catharanthus	0.517377	0.639055	0.358947	0.0434455	0.505789	1.41578	1.53459	1.5684	0.691144	0.873521	0.319777	0.670533	0.57396	0.293059	-3.27848	-2.86345	-3.86345
1	Nsylvestris_NODE_10524_length_2048_cov_48	PPR75_ARATH^PPR75_ARATH^Q:1958-222,H:3-584^48.288%ID^E:0^RecName: Full=Pentatricopeptide repeat-containing protein At1g50270;^Eukaryota; Viridiplantae; Streptophyta; Embryophyta; Tracheophyta; Spermatophyta; Magnoliopsida; eudicotyledons; Gunneridae; Pentapetalae; rosids; malvids; Brassicales; Brassicaceae; Camelineae; Arabidopsis	1.66985	2.12175	-0.54777	0.527806	1.21276	2.00862	2.2309	1.45677	0.523773	0.987028	0.761494	0.303591	-0.494221	-0.400381	-4.12066	-4.12066	-4.12066
1	Nsylvestris_NODE_10525_length_2048_cov_40	NFD4_ARATH^NFD4_ARATH^Q:74-1747,H:2-563^23.529%ID^E:1.09e-23^RecName: Full=Protein NUCLEAR FUSION DEFECTIVE 4 {ECO:0000303|PubMed:16698901};^Eukaryota; Viridiplantae; Streptophyta; Embryophyta; Tracheophyta; Spermatophyta; Magnoliopsida; eudicotyledons; Gunneridae; Pentapetalae; rosids; malvids; Brassicales; Brassicaceae; Camelineae; Arabidopsis	0.163685	1.27211	1.0622	0.349127	-0.963303	1.15897	2.27168	1.71914	0.0632065	0.895742	0.134173	1.15091	0.396406	0.644122	-3.77272	-3.77272	-2.77272
1	Nsylvestris_NODE_10526_length_2047_cov_119	ATPX_SPIOL^ATPX_SPIOL^Q:1526-1113,H:76-213^81.884%ID^E:6.56e-59^RecName: Full=ATP synthase subunit b', chloroplastic;^Eukaryota; Viridiplantae; Streptophyta; Embryophyta; Tracheophyta; Spermatophyta; Magnoliopsida; eudicotyledons; Gunneridae; Pentapetalae; Caryophyllales; Chenopodiaceae; Chenopodioideae; Anserineae; Spinacia	1.2374	1.33389	1.01865	-0.0688136	0.52673	0.390399	1.25311	1.10084	1.35532	1.03762	1.40649	1.95363	1.66725	0.426882	-3.33185	-5.65378	-5.65378
1	Nsylvestris_NODE_10527_length_2047_cov_113	NFD4_ARATH^NFD4_ARATH^Q:60-1700,H:32-565^24.956%ID^E:2.61e-31^RecName: Full=Protein NUCLEAR FUSION DEFECTIVE 4 {ECO:0000303|PubMed:16698901};^Eukaryota; Viridiplantae; Streptophyta; Embryophyta; Tracheophyta; Spermatophyta; Magnoliopsida; eudicotyledons; Gunneridae; Pentapetalae; rosids; malvids; Brassicales; Brassicaceae; Camelineae; Arabidopsis	-0.10878	1.04625	1.55838	0.343759	1.12934	1.40717	1.6901	1.62956	1.08072	1.44091	1.13893	-0.443139	1.51887	0.0670927	-4.49972	-4.49972	-4.49972
1	Nsylvestris_NODE_10529_length_2047_cov_17	.	-0.425223	-0.103295	-1.42522	-1.42522	-0.425223	1.03421	2.21863	1.38213	0.574777	1.15854	1.96778	-0.103295	1.57297	1.27411	-2.42522	-2.42522	-2.42522
1	Nsylvestris_NODE_1053_length_4875_cov_140	LPAI_ARATH^LPAI_ARATH^Q:4302-448,H:17-1309^69.172%ID^E:0^RecName: Full=Phospholipase A I;^Eukaryota; Viridiplantae; Streptophyta; Embryophyta; Tracheophyta; Spermatophyta; Magnoliopsida; eudicotyledons; Gunneridae; Pentapetalae; rosids; malvids; Brassicales; Brassicaceae; Camelineae; Arabidopsis	0.198539	0.808464	0.0974909	-0.000864802	0.348938	1.33067	2.31397	0.657447	0.742513	0.822669	0.103179	0.873697	1.15895	0.361728	-4.13325	-3.25118	-2.43295
1	Nsylvestris_NODE_10530_length_2047_cov_16	.	0.445629	0.993117	1.00672	0.832652	-0.0848857	0.445629	1.44563	-0.254811	0.465468	0.104148	1.39825	0.745189	1.38905	0.832652	-3.25481	-3.25481	-3.25481
1	Nsylvestris_NODE_10533_length_2046_cov_204	CISY_DAUCA^CISY_DAUCA^Q:194-1603,H:1-471^88.535%ID^E:0^RecName: Full=Citrate synthase, mitochondrial;^Eukaryota; Viridiplantae; Streptophyta; Embryophyta; Tracheophyta; Spermatophyta; Magnoliopsida; eudicotyledons; Gunneridae; Pentapetalae; asterids; campanulids; Apiales; Apiaceae; Apioideae; Scandiceae; Daucinae; Daucus; Daucus sect. Daucus	-0.125204	0.150256	0.030666	-0.476235	0.372824	0.343963	1.77089	1.61914	0.264965	0.146461	0.23473	0.101955	0.462183	-0.304504	-1.23784	-1.62079	-1.73346
1	Nsylvestris_NODE_10535_length_2046_cov_175	.	0.398942	1.09666	-0.405111	-0.248842	0.665822	0.985677	1.74531	0.935011	0.624566	0.35794	-0.0813266	0.52823	0.438368	0.0980604	-2.42246	-1.97057	-2.74627
1	Nsylvestris_NODE_10538_length_2046_cov_41	FBX15_ARATH^FBX15_ARATH^Q:240-959,H:1-230^30.522%ID^E:1.45e-14^RecName: Full=Putative F-box only protein 15;^Eukaryota; Viridiplantae; Streptophyta; Embryophyta; Tracheophyta; Spermatophyta; Magnoliopsida; eudicotyledons; Gunneridae; Pentapetalae; rosids; malvids; Brassicales; Brassicaceae; Camelineae; Arabidopsis	0.0837809	-0.245379	-0.653185	-0.653185	-0.653185	-0.238147	0.346815	1.08378	2.69778	2.57281	1.9845	0.437669	-0.241758	0.192138	-2.23815	-2.23815	-2.23815
1	Nsylvestris_NODE_10542_length_2045_cov_60	.	1.56127	1.21372	1.06967	0.33511	-0.2379	1.45483	2.64014	0.561269	1.08831	-2.25226	-0.662492	-2.25226	1.36363	-0.667293	-2.25226	-0.711236	-2.25226
1	Nsylvestris_NODE_10544_length_2044_cov_204	EDA2_ARATH^EDA2_ARATH^Q:1847-516,H:42-487^68.161%ID^E:0^RecName: Full=Probable serine protease EDA2;^Eukaryota; Viridiplantae; Streptophyta; Embryophyta; Tracheophyta; Spermatophyta; Magnoliopsida; eudicotyledons; Gunneridae; Pentapetalae; rosids; malvids; Brassicales; Brassicaceae; Camelineae; Arabidopsis	0.474947	0.670462	0.267667	-0.475986	0.317478	-0.368755	0.822055	1.03594	1.01876	0.584313	1.1362	0.483443	0.87143	-0.159646	-2.56564	-1.92345	-2.18921
1	Nsylvestris_NODE_10547_length_2044_cov_96	CCR4D_ARATH^CCR4D_ARATH^Q:1105-1824,H:185-414^62.81%ID^E:2.85e-94^RecName: Full=Carbon catabolite repressor protein 4 homolog 4;^Eukaryota; Viridiplantae; Streptophyta; Embryophyta; Tracheophyta; Spermatophyta; Magnoliopsida; eudicotyledons; Gunneridae; Pentapetalae; rosids; malvids; Brassicales; Brassicaceae; Camelineae; Arabidopsis`CCR4D_ARATH^CCR4D_ARATH^Q:255-614,H:25-181^51.592%ID^E:6.61e-37…	1.31572	1.03051	1.15453	-0.227952	1.2013	0.542317	1.72419	2.50117	0.987635	0.0462692	0.889005	0.135487	0.39969	0.152225	-4.32628	-2.7141	-4.81171
1	Nsylvestris_NODE_10548_length_2044_cov_60	PIRL5_ORYSJ^PIRL5_ORYSJ^Q:1925-459,H:3-535^50.749%ID^E:3.92e-160^RecName: Full=Plant intracellular Ras-group-related LRR protein 5;^Eukaryota; Viridiplantae; Streptophyta; Embryophyta; Tracheophyta; Spermatophyta; Magnoliopsida; Liliopsida; Poales; Poaceae; BOP clade; Oryzoideae; Oryzeae; Oryzinae; Oryza; Oryza sativa	1.39298	0.921828	1.50011	-1.1091	0.948065	1.55387	1.47587	1.73221	0.00193478	-0.373574	0.965866	0.305941	0.33716	0.393404	-2.65844	-3.69406	-3.69406
1	Nsylvestris_NODE_10549_length_2044_cov_51	AMI4G_ARATH^AMI4G_ARATH^Q:1772-819,H:38-340^57.233%ID^E:1.33e-137^RecName: Full=Probable amidase At4g34880 {ECO:0000305};^Eukaryota; Viridiplantae; Streptophyta; Embryophyta; Tracheophyta; Spermatophyta; Magnoliopsida; eudicotyledons; Gunneridae; Pentapetalae; rosids; malvids; Brassicales; Brassicaceae; Camelineae; Arabidopsis`AMI4G_ARATH^AMI4G_ARATH^Q:816-325,H:344-511^51.786%ID^E:1.33e-137^RecN…	0.925862	1.33761	0.313498	-0.200716	1.16205	1.45625	1.98968	0.600641	1.0777	1.42128	0.0502962	-0.453966	1.16531	0.52953	-3.79168	-3.79168	-3.79168
1	Nsylvestris_NODE_10553_length_2043_cov_222	HMCS_ARATH^HMCS_ARATH^Q:269-1639,H:3-461^81.917%ID^E:0^RecName: Full=Hydroxymethylglutaryl-CoA synthase;^Eukaryota; Viridiplantae; Streptophyta; Embryophyta; Tracheophyta; Spermatophyta; Magnoliopsida; eudicotyledons; Gunneridae; Pentapetalae; rosids; malvids; Brassicales; Brassicaceae; Camelineae; Arabidopsis	0.163102	0.410874	-0.288234	-1.91905	0.0173291	0.451059	1.4748	0.750389	-0.243482	-0.765017	1.21999	-0.0618955	2.32938	-0.308432	-0.552336	-1.79481	-0.883668
1	Nsylvestris_NODE_10556_length_2043_cov_61	PTR14_ARATH^PTR14_ARATH^Q:168-1940,H:1-598^68.5%ID^E:0^RecName: Full=Protein NRT1/ PTR FAMILY 7.3;^Eukaryota; Viridiplantae; Streptophyta; Embryophyta; Tracheophyta; Spermatophyta; Magnoliopsida; eudicotyledons; Gunneridae; Pentapetalae; rosids; malvids; Brassicales; Brassicaceae; Camelineae; Arabidopsis	1.83941	0.725372	-1.68675	-1.21949	0.523239	0.517479	2.405	2.28301	1.23732	0.451052	2.12676	-1.72038	1.33796	-0.406646	-2.80445	-2.80445	-2.80445
1	Nsylvestris_NODE_10557_length_2043_cov_29	.	0.752129	0.13802	-0.154762	-0.154762	-1.5698	0.0151633	-0.154762	0.652593	1.97287	1.71215	0.0151633	0.752129	0.30467	0.0135594	-1.15476	-1.5698	-1.5698
1	Nsylvestris_NODE_10559_length_2042_cov_212	FAD6C_BRANA^FAD6C_BRANA^Q:321-1649,H:1-442^74.041%ID^E:0^RecName: Full=Omega-6 fatty acid desaturase, chloroplastic {ECO:0000303|PubMed:8066133};^Eukaryota; Viridiplantae; Streptophyta; Embryophyta; Tracheophyta; Spermatophyta; Magnoliopsida; eudicotyledons; Gunneridae; Pentapetalae; rosids; malvids; Brassicales; Brassicaceae; Brassiceae; Brassica	1.72633	1.07172	0.722363	0.381174	0.88019	0.506705	1.74134	1.51797	1.16006	0.270722	0.537721	0.813382	0.674662	0.89427	-6.3277	-3.89742	-2.6735
1	Nsylvestris_NODE_1056_length_4873_cov_105	EAAC_ARATH^EAAC_ARATH^Q:1328-387,H:68-381^77.07%ID^E:4.07e-160^RecName: Full=Probable envelope ADP,ATP carrier protein, chloroplastic;^Eukaryota; Viridiplantae; Streptophyta; Embryophyta; Tracheophyta; Spermatophyta; Magnoliopsida; eudicotyledons; Gunneridae; Pentapetalae; rosids; malvids; Brassicales; Brassicaceae; Camelineae; Arabidopsis	1.43378	1.29938	-0.0348256	0.786348	1.54043	1.25137	2.22539	0.842571	0.901904	1.1257	0.269483	0.532576	0.935305	0.501491	-4.99897	-3.92386	-4.68807
1	Nsylvestris_NODE_10562_length_2042_cov_108	IQD14_ARATH^IQD14_ARATH^Q:553-954,H:324-446^28.358%ID^E:1.51e-10^RecName: Full=Protein IQ-DOMAIN 14;^Eukaryota; Viridiplantae; Streptophyta; Embryophyta; Tracheophyta; Spermatophyta; Magnoliopsida; eudicotyledons; Gunneridae; Pentapetalae; rosids; malvids; Brassicales; Brassicaceae; Camelineae; Arabidopsis	0.579001	1.85911	1.39753	0.600916	0.356609	1.79577	2.61813	2.44945	0.110082	0.723995	0.362798	0.691455	0.228473	-0.0879906	-4.56178	-4.56178	-4.56178
1	Nsylvestris_NODE_10563_length_2042_cov_81	PG1_PEA^PG1_PEA^Q:828-1721,H:61-358^63.333%ID^E:1.13e-105^RecName: Full=Plastoglobulin-1, chloroplastic;^Eukaryota; Viridiplantae; Streptophyta; Embryophyta; Tracheophyta; Spermatophyta; Magnoliopsida; eudicotyledons; Gunneridae; Pentapetalae; rosids; fabids; Fabales; Fabaceae; Papilionoideae; 50 kb inversion clade; NPAAA clade; Hologalegina; IRL clade; Fabeae; Pisum	0.456514	0.540062	0.330731	0.107992	0.489535	1.48462	2.41058	1.21478	1.05891	0.747655	0.561945	0.853044	1.52479	1.03836	-4.15077	-5.06878	-3.59996
1	Nsylvestris_NODE_10565_length_2042_cov_7	.	0.511365	0.221858	-1.3631	0.511365	-0.140712	0.859288	2.22186	-0.140712	0.752373	0.221858	0.511365	-0.140712	0.859288	0.373861	-1.94807	-1.94807	-1.3631
1	Nsylvestris_NODE_10569_length_2041_cov_175	IPT9_ARATH^IPT9_ARATH^Q:1787-600,H:52-448^66.751%ID^E:0^RecName: Full=tRNA dimethylallyltransferase 9;^Eukaryota; Viridiplantae; Streptophyta; Embryophyta; Tracheophyta; Spermatophyta; Magnoliopsida; eudicotyledons; Gunneridae; Pentapetalae; rosids; malvids; Brassicales; Brassicaceae; Camelineae; Arabidopsis	0.629205	1.01823	0.0309337	0.623625	0.674391	1.54244	2.32994	1.54244	1.16874	1.13479	1.05563	0.794077	0.731786	0.54834	-5.78848	-4.11945	-3.91664
1	Nsylvestris_NODE_10570_length_2041_cov_128	OFT31_ARATH^OFT31_ARATH^Q:227-1657,H:39-517^73.695%ID^E:0^RecName: Full=O-fucosyltransferase 31 {ECO:0000305};^Eukaryota; Viridiplantae; Streptophyta; Embryophyta; Tracheophyta; Spermatophyta; Magnoliopsida; eudicotyledons; Gunneridae; Pentapetalae; rosids; malvids; Brassicales; Brassicaceae; Camelineae; Arabidopsis	0.658328	0.60085	0.084086	-0.694365	0.0426005	0.51088	1.05341	0.975548	0.232586	0.42827	-0.542796	-0.382742	0.456553	-0.390923	-0.441612	-1.27175	-1.31892
1	Nsylvestris_NODE_10571_length_2041_cov_98	.	0.075496	1.61155	1.08556	1.19784	0.075496	1.75357	2.73085	0.454008	0.454008	1.50792	0.075496	-0.246432	-0.374588	-0.66147	-3.24643	-3.24643	-3.24643
1	Nsylvestris_NODE_10572_length_2041_cov_75	.	-0.20217	1.10702	1.05971	-0.0398249	0.737783	0.93418	1.921	1.67638	-0.14674	0.644673	0.400748	1.66061	1.08899	0.107017	-3.84718	-3.26222	-3.83998
1	Nsylvestris_NODE_10576_length_2040_cov_227	TCPB_ARATH^TCPB_ARATH^Q:180-1751,H:1-524^89.313%ID^E:0^RecName: Full=T-complex protein 1 subunit beta {ECO:0000303|PubMed:11599560};^Eukaryota; Viridiplantae; Streptophyta; Embryophyta; Tracheophyta; Spermatophyta; Magnoliopsida; eudicotyledons; Gunneridae; Pentapetalae; rosids; malvids; Brassicales; Brassicaceae; Camelineae; Arabidopsis	0.427138	0.841763	0.311434	-0.176935	0.291667	1.54126	2.21434	1.39045	0.598748	0.818572	0.650271	0.591221	0.717722	0.121493	-3.00488	-3.49941	-3.83486
1	Nsylvestris_NODE_10577_length_2040_cov_216	MEX1_ARATH^MEX1_ARATH^Q:1571-402,H:22-414^56.75%ID^E:1.85e-120^RecName: Full=Maltose excess protein 1, chloroplastic;^Eukaryota; Viridiplantae; Streptophyta; Embryophyta; Tracheophyta; Spermatophyta; Magnoliopsida; eudicotyledons; Gunneridae; Pentapetalae; rosids; malvids; Brassicales; Brassicaceae; Camelineae; Arabidopsis	0.539609	1.11175	-0.170491	0.233794	0.250571	1.84827	2.36284	1.53972	0.381291	0.393378	-0.112658	0.263799	0.48429	0.509667	-2.77667	-3.75364	-3.10552
1	Nsylvestris_NODE_1058_length_4871_cov_71	TTM3_ARATH^TTM3_ARATH^Q:2-601,H:3-210^57.212%ID^E:3.19e-58^RecName: Full=Triphosphate tunnel metalloenzyme 3;^Eukaryota; Viridiplantae; Streptophyta; Embryophyta; Tracheophyta; Spermatophyta; Magnoliopsida; eudicotyledons; Gunneridae; Pentapetalae; rosids; malvids; Brassicales; Brassicaceae; Camelineae; Arabidopsis	1.06318	1.26855	0.51833	-0.332855	0.516043	1.80956	2.39314	1.74012	0.86329	0.81976	0.648474	0.481687	1.07917	0.332849	-3.6754	-4.47893	-5.04696
1	Nsylvestris_NODE_10581_length_2041_cov_116	YLMH_BACSU^YLMH_BACSU^Q:1644-988,H:23-234^33.036%ID^E:1.51e-22^RecName: Full=Putative RNA-binding protein YlmH;^Bacteria; Firmicutes; Bacilli; Bacillales; Bacillaceae; Bacillus	0.392169	0.512371	0.216721	-0.314425	0.485424	1.71866	2.01807	1.39854	0.626944	0.514505	0.54336	0.405647	0.76391	0.491937	-2.61754	-2.32775	-4.82855
1	Nsylvestris_NODE_10583_length_2039_cov_219	GALK1_ARATH^GALK1_ARATH^Q:310-1809,H:1-496^75.4%ID^E:0^RecName: Full=Galactokinase;^Eukaryota; Viridiplantae; Streptophyta; Embryophyta; Tracheophyta; Spermatophyta; Magnoliopsida; eudicotyledons; Gunneridae; Pentapetalae; rosids; malvids; Brassicales; Brassicaceae; Camelineae; Arabidopsis	0.624786	0.74416	-0.365179	-0.457576	0.371217	0.0100826	1.14753	1.11622	0.0846764	-0.211417	-0.42216	0.56345	0.886311	0.176946	-1.38825	-1.45091	-1.4299
1	Nsylvestris_NODE_10587_length_2039_cov_180	AROD6_ARATH^AROD6_ARATH^Q:1639-584,H:26-402^80.106%ID^E:0^RecName: Full=Arogenate dehydratase/prephenate dehydratase 6, chloroplastic;^Eukaryota; Viridiplantae; Streptophyta; Embryophyta; Tracheophyta; Spermatophyta; Magnoliopsida; eudicotyledons; Gunneridae; Pentapetalae; rosids; malvids; Brassicales; Brassicaceae; Camelineae; Arabidopsis	0.926758	1.32717	0.394331	-0.00303153	0.975077	-1.25024	0.425541	0.986813	1.43447	1.52837	0.898562	0.520954	1.78625	0.0459666	-3.33257	-3.02714	-3.63727
1	Nsylvestris_NODE_10589_length_2039_cov_52	S40A2_ARATH^S40A2_ARATH^Q:288-1718,H:29-506^63.598%ID^E:0^RecName: Full=Solute carrier family 40 member 2;^Eukaryota; Viridiplantae; Streptophyta; Embryophyta; Tracheophyta; Spermatophyta; Magnoliopsida; eudicotyledons; Gunneridae; Pentapetalae; rosids; malvids; Brassicales; Brassicaceae; Camelineae; Arabidopsis	-0.20436	0.581609	-1.20436	-0.526288	-0.0169086	0.683166	1.57174	0.380603	0.840559	0.482029	-0.356363	0.496524	0.39591	-0.00272582	-0.619397	-1.51461	-0.987129
1	Nsylvestris_NODE_10592_length_2039_cov_21	DRL23_ARATH^DRL23_ARATH^Q:1001-9,H:345-639^33.136%ID^E:2.02e-58^RecName: Full=Putative disease resistance protein At4g10780;^Eukaryota; Viridiplantae; Streptophyta; Embryophyta; Tracheophyta; Spermatophyta; Magnoliopsida; eudicotyledons; Gunneridae; Pentapetalae; rosids; malvids; Brassicales; Brassicaceae; Camelineae; Arabidopsis`DRL23_ARATH^DRL23_ARATH^Q:1871-1170,H:32-276^29.644%ID^E:2.02e-58^R…	0.609423	0.697595	0.448508	-0.10976	-0.0172143	1.69759	2.51843	1.78942	0.301666	0.563796	-1.07062	1.63494	0.563796	-0.298289	-3.10976	-3.10976	-3.10976
1	Nsylvestris_NODE_10595_length_2038_cov_212	ERGI3_DANRE^ERGI3_DANRE^Q:1658-501,H:1-383^51.263%ID^E:6.34e-137^RecName: Full=Endoplasmic reticulum-Golgi intermediate compartment protein 3;^Eukaryota; Metazoa; Chordata; Craniata; Vertebrata; Euteleostomi; Actinopterygii; Neopterygii; Teleostei; Ostariophysi; Cypriniformes; Cyprinidae; Danio	0.758684	0.91972	0.291931	-0.255025	0.82785	1.35394	2.38978	1.95984	1.13276	0.958164	0.647841	1.20793	1.76684	0.551812	-4.08835	-5.45475	-4.96898
1	Nsylvestris_NODE_10596_length_2038_cov_122	STR6_ARATH^STR6_ARATH^Q:130-1899,H:29-581^64.983%ID^E:0^RecName: Full=Rhodanese-like domain-containing protein 6;^Eukaryota; Viridiplantae; Streptophyta; Embryophyta; Tracheophyta; Spermatophyta; Magnoliopsida; eudicotyledons; Gunneridae; Pentapetalae; rosids; malvids; Brassicales; Brassicaceae; Camelineae; Arabidopsis	0.170172	1.35425	-0.730647	-0.0437241	0.477381	1.61401	1.87391	0.579471	1.35443	1.59753	0.828371	2.05693	0.712375	0.619865	-4.9702	-3.84587	-3.64827
1	Nsylvestris_NODE_10599_length_2038_cov_18	POLR2_ARATH^POLR2_ARATH^Q:257-9,H:479-561^32.955%ID^E:3.51e-11^RecName: Full=Retrovirus-related Pol polyprotein from transposon RE2;^Eukaryota; Viridiplantae; Streptophyta; Embryophyta; Tracheophyta; Spermatophyta; Magnoliopsida; eudicotyledons; Gunneridae; Pentapetalae; rosids; malvids; Brassicales; Brassicaceae; Camelineae; Arabidopsis`POLR2_ARATH^POLR2_ARATH^Q:801-517,H:297-388^30.303%ID^E:3.5…	0.0470562	0.239701	-1.7603	-0.175336	-1.7603	0.940141	2.14659	1.69913	1.14659	0.699133	1.48763	1.2397	0.699133	1.63202	-2.7603	-2.7603	-2.7603
1	Nsylvestris_NODE_1060_length_4869_cov_22	POLR1_ARATH^POLR1_ARATH^Q:1218-241,H:1148-1464^40.184%ID^E:6.46e-85^RecName: Full=Retrovirus-related Pol polyprotein from transposon RE1;^Eukaryota; Viridiplantae; Streptophyta; Embryophyta; Tracheophyta; Spermatophyta; Magnoliopsida; eudicotyledons; Gunneridae; Pentapetalae; rosids; malvids; Brassicales; Brassicaceae; Camelineae; Arabidopsis`POLR1_ARATH^POLR1_ARATH^Q:1570-1208,H:1028-1151^42.742…	0.473914	0.939578	1.03579	0.836484	0.329524	1.21088	2.52454	1.69631	1.03579	-0.111048	0.169059	0.473914	1.25152	-0.111048	-3.9184	-3.9184	-3.9184
1	Nsylvestris_NODE_10600_length_2037_cov_137	CCS1_ARATH^CCS1_ARATH^Q:450-1553,H:97-547^50.552%ID^E:5.95e-131^RecName: Full=Cytochrome c biogenesis protein CCS1, chloroplastic;^Eukaryota; Viridiplantae; Streptophyta; Embryophyta; Tracheophyta; Spermatophyta; Magnoliopsida; eudicotyledons; Gunneridae; Pentapetalae; rosids; malvids; Brassicales; Brassicaceae; Camelineae; Arabidopsis	-0.333158	0.669864	0.779938	0.479756	0.917668	0.150154	1.45467	1.17376	0.424366	1.09001	1.82898	-1.17177	0.468616	-0.346667	-2.42905	-1.41475	-3.74238
1	Nsylvestris_NODE_10601_length_2037_cov_51	SHGR2_ARATH^SHGR2_ARATH^Q:1-141,H:274-323^64%ID^E:3.59e-09^RecName: Full=Phospholipase SGR2;^Eukaryota; Viridiplantae; Streptophyta; Embryophyta; Tracheophyta; Spermatophyta; Magnoliopsida; eudicotyledons; Gunneridae; Pentapetalae; rosids; malvids; Brassicales; Brassicaceae; Camelineae; Arabidopsis	1.16713	0.855188	-0.0959023	0.48906	-0.195438	-0.195438	1.16773	-0.0485966	1.20666	1.01913	1.89202	0.354759	2.04171	1.76539	-5.00279	-2.41783	-4.00279
1	Nsylvestris_NODE_10605_length_2036_cov_226	MOS11_ARATH^MOS11_ARATH^Q:359-688,H:79-194^62.069%ID^E:1.56e-34^RecName: Full=Protein MODIFIER OF SNC1 11;^Eukaryota; Viridiplantae; Streptophyta; Embryophyta; Tracheophyta; Spermatophyta; Magnoliopsida; eudicotyledons; Gunneridae; Pentapetalae; rosids; malvids; Brassicales; Brassicaceae; Camelineae; Arabidopsis	0.448051	0.531539	-0.0842557	-0.422594	0.139904	0.863584	1.95259	0.826756	0.796176	0.502254	0.813454	0.850976	0.93514	0.513786	-2.65581	-2.54467	-3.46689
1	Nsylvestris_NODE_10612_length_2035_cov_224	C93A3_SOYBN^C93A3_SOYBN^Q:229-1725,H:3-505^38.462%ID^E:3.83e-111^RecName: Full=Cytochrome P450 93A3;^Eukaryota; Viridiplantae; Streptophyta; Embryophyta; Tracheophyta; Spermatophyta; Magnoliopsida; eudicotyledons; Gunneridae; Pentapetalae; rosids; fabids; Fabales; Fabaceae; Papilionoideae; 50 kb inversion clade; NPAAA clade; indigoferoid/millettioid clade; Phaseoleae; Glycine; Soja	1.1469	0.346969	-0.28675	-0.640262	0.507163	0.26207	1.69414	0.724363	0.81764	0.181635	0.793762	0.537851	1.10175	0.485097	-2.94922	-1.19316	-3.52995
1	Nsylvestris_NODE_1062_length_4866_cov_138	M3K5G_ARATH^M3K5G_ARATH^Q:2778-4109,H:184-646^59.188%ID^E:1.53e-164^RecName: Full=Mitogen-activated protein kinase kinase kinase 5 {ECO:0000303|PubMed:27679653};^Eukaryota; Viridiplantae; Streptophyta; Embryophyta; Tracheophyta; Spermatophyta; Magnoliopsida; eudicotyledons; Gunneridae; Pentapetalae; rosids; malvids; Brassicales; Brassicaceae; Camelineae; Arabidopsis	-0.66615	0.77361	0.868677	-0.991581	0.859734	-1.18828	1.10954	-0.207991	1.66415	1.39479	0.342435	1.5457	2.07642	-1.14164	-2.67515	-1.16781	-2.59646
1	Nsylvestris_NODE_10620_length_2035_cov_22	CB60D_ARATH^CB60D_ARATH^Q:1982-327,H:2-586^35.285%ID^E:2.19e-99^RecName: Full=Calmodulin-binding protein 60 D {ECO:0000303|PubMed:11782485};^Eukaryota; Viridiplantae; Streptophyta; Embryophyta; Tracheophyta; Spermatophyta; Magnoliopsida; eudicotyledons; Gunneridae; Pentapetalae; rosids; malvids; Brassicales; Brassicaceae; Camelineae; Arabidopsis	-0.0236226	1.06677	2.74839	0.104534	1.83499	0.104534	1.8415	-0.158501	2.20467	0.0393647	-3.48043	2.64224	2.12542	-0.608585	-3.48043	-3.48043	-3.48043
1	Nsylvestris_NODE_10622_length_2034_cov_222	AGM1_ARATH^AGM1_ARATH^Q:1928-264,H:1-554^66.252%ID^E:0^RecName: Full=Phosphoacetylglucosamine mutase;^Eukaryota; Viridiplantae; Streptophyta; Embryophyta; Tracheophyta; Spermatophyta; Magnoliopsida; eudicotyledons; Gunneridae; Pentapetalae; rosids; malvids; Brassicales; Brassicaceae; Camelineae; Arabidopsis	1.07638	0.944606	0.0146219	0.054697	0.895344	1.85716	2.69162	2.11527	0.229812	-0.0124988	0.159412	0.147362	0.838233	0.47206	-3.67037	-4.15623	-3.65747
1	Nsylvestris_NODE_10625_length_2034_cov_134	MFSD5_MOUSE^MFSD5_MOUSE^Q:1641-739,H:76-379^23.27%ID^E:1.25e-06^RecName: Full=Molybdate-anion transporter;^Eukaryota; Metazoa; Chordata; Craniata; Vertebrata; Euteleostomi; Mammalia; Eutheria; Euarchontoglires; Glires; Rodentia; Myomorpha; Muroidea; Muridae; Murinae; Mus; Mus	0.0626301	0.472611	-0.410262	-0.653895	0.265593	1.21493	1.64987	0.459592	0.241402	0.392671	0.273054	-0.164223	0.366933	-0.349738	-1.2094	-1.2553	-1.35647
1	Nsylvestris_NODE_10627_length_2034_cov_79	PYL5_ORYSJ^PYL5_ORYSJ^Q:1743-1603,H:38-84^76.596%ID^E:6.18e-28^RecName: Full=Abscisic acid receptor PYL5 {ECO:0000305};^Eukaryota; Viridiplantae; Streptophyta; Embryophyta; Tracheophyta; Spermatophyta; Magnoliopsida; Liliopsida; Poales; Poaceae; BOP clade; Oryzoideae; Oryzeae; Oryzinae; Oryza; Oryza sativa`PYL5_ORYSJ^PYL5_ORYSJ^Q:1601-1455,H:83-132^66%ID^E:6.18e-28^RecName: Full=Abscisic acid rec…	0.666113	0.102845	0.856935	0.102845	0.0811503	0.666113	1.4118	1.07018	0.544551	0.124219	0.265383	0.24621	1.16604	0.575915	-2.51302	-2.0363	-3.33098
1	Nsylvestris_NODE_10629_length_2034_cov_34	PP125_ARATH^PP125_ARATH^Q:1918-566,H:33-482^67.55%ID^E:0^RecName: Full=Pentatricopeptide repeat-containing protein At1g74900, mitochondrial;^Eukaryota; Viridiplantae; Streptophyta; Embryophyta; Tracheophyta; Spermatophyta; Magnoliopsida; eudicotyledons; Gunneridae; Pentapetalae; rosids; malvids; Brassicales; Brassicaceae; Camelineae; Arabidopsis	0.344611	1.17081	0.0946164	-0.230173	-0.0566723	2.70098	3.12712	1.24769	-0.65599	-0.781521	-0.919024	0.566402	-0.540513	-1.65599	-1.89329	-0.6286	-1.89046
1	Nsylvestris_NODE_10633_length_2033_cov_178	.	1.15121	0.61916	0.410346	0.331793	1.26341	1.01913	1.76329	1.25041	0.987956	0.330631	0.684521	0.770377	1.55007	0.694492	-3.27777	-5.3028	-4.24622
1	Nsylvestris_NODE_10634_length_2033_cov_167	.	0.585965	0.474168	-0.261529	-0.764754	-0.0827701	0.735478	1.41796	0.899346	1.13816	0.896344	1.5089	0.878526	1.20612	0.534075	-3.1991	-2.24066	-3.72623
1	Nsylvestris_NODE_10635_length_2033_cov_158	.	0.906283	1.5189	1.13876	0.542431	0.946205	1.25321	1.85641	1.60349	1.10243	0.988363	0.960845	1.30353	1.28985	0.307033	-4.96464	-4.97286	-5.78022
1	Nsylvestris_NODE_10637_length_2033_cov_65	.	0.749001	0.836464	1.5903	0.0220197	-0.135522	1.91893	2.82937	1.93222	0.971394	0.687601	0.655892	1.02202	1.20843	0.219755	-4.83596	-4.83596	-4.83596
1	Nsylvestris_NODE_1064_length_4863_cov_92	KN14Q_ARATH^KN14Q_ARATH^Q:2775-760,H:358-1015^68.935%ID^E:0^RecName: Full=Kinesin-like protein KIN-14Q {ECO:0000305};^Eukaryota; Viridiplantae; Streptophyta; Embryophyta; Tracheophyta; Spermatophyta; Magnoliopsida; eudicotyledons; Gunneridae; Pentapetalae; rosids; malvids; Brassicales; Brassicaceae; Camelineae; Arabidopsis`KN14Q_ARATH^KN14Q_ARATH^Q:999-397,H:1015-1202^40%ID^E:6.73e-23^RecName: Fu…	-0.133329	0.663254	0.66159	-0.337855	-0.23094	1.2962	1.81969	0.819686	-0.720702	-1.27701	0.542453	-0.288761	-0.135257	0.13163	-0.722149	-1.46298	-0.625514
1	Nsylvestris_NODE_10641_length_2032_cov_188	TBB8_ARATH^TBB8_ARATH^Q:1561-284,H:1-426^98.592%ID^E:0^RecName: Full=Tubulin beta-8 chain;^Eukaryota; Viridiplantae; Streptophyta; Embryophyta; Tracheophyta; Spermatophyta; Magnoliopsida; eudicotyledons; Gunneridae; Pentapetalae; rosids; malvids; Brassicales; Brassicaceae; Camelineae; Arabidopsis	1.1066	-0.184107	0.954012	-0.703337	1.02204	0.349473	-0.081727	0.397906	0.030498	-0.556817	2.24786	-1.56635	4.47034	-0.0982936	-1.72042	-3.65222	-2.01546
1	Nsylvestris_NODE_10643_length_2032_cov_94	MRG1_ARATH^MRG1_ARATH^Q:488-3,H:4-161^66.258%ID^E:4.52e-65^RecName: Full=Protein MRG1 {ECO:0000303|PubMed:25211338};^Eukaryota; Viridiplantae; Streptophyta; Embryophyta; Tracheophyta; Spermatophyta; Magnoliopsida; eudicotyledons; Gunneridae; Pentapetalae; rosids; malvids; Brassicales; Brassicaceae; Camelineae; Arabidopsis	0.78005	0.368864	-0.047884	-0.23027	-0.388858	0.169856	0.934419	0.972789	1.11163	1.16879	0.839235	0.47153	1.72441	0.360005	-3.22124	-2.32525	-2.68808
1	Nsylvestris_NODE_10644_length_2032_cov_56	RBK2_ARATH^RBK2_ARATH^Q:434-1624,H:66-458^51.005%ID^E:1.19e-131^RecName: Full=Receptor-like cytosolic serine/threonine-protein kinase RBK2;^Eukaryota; Viridiplantae; Streptophyta; Embryophyta; Tracheophyta; Spermatophyta; Magnoliopsida; eudicotyledons; Gunneridae; Pentapetalae; rosids; malvids; Brassicales; Brassicaceae; Camelineae; Arabidopsis	0.554761	0.61627	0.847596	-0.737367	0.221991	-0.0999369	1.55214	1.22199	1.60494	1.415	1.5459	0.485026	1.11152	0.291202	-2.81644	-3.90729	-3.90729
1	Nsylvestris_NODE_10645_length_2032_cov_42	.	1.58858	0.9809	0.173545	-0.411417	0.173545	0.588583	1.17355	0.495473	1.11214	0.911232	2.39697	0.289022	0.588583	0.173545	-3.41142	-3.41142	-3.41142
1	Nsylvestris_NODE_10647_length_2032_cov_22	PP280_ARATH^PP280_ARATH^Q:248-1897,H:167-716^34.539%ID^E:2.76e-111^RecName: Full=Pentatricopeptide repeat-containing protein At3g53360, mitochondrial;^Eukaryota; Viridiplantae; Streptophyta; Embryophyta; Tracheophyta; Spermatophyta; Magnoliopsida; eudicotyledons; Gunneridae; Pentapetalae; rosids; malvids; Brassicales; Brassicaceae; Camelineae; Arabidopsis`PP280_ARATH^PP280_ARATH^Q:260-1696,H:70-5…	0.19536	1.28929	1.4551	0.0627835	1.06278	1.15025	1.96967	1.52222	-0.307277	0.61122	0.146848	1.01325	-0.131924	-1.22793	-2.93722	-2.93722	-2.93722
1	Nsylvestris_NODE_10648_length_2031_cov_229	U2AFB_ARATH^U2AFB_ARATH^Q:1-372,H:62-185^82.258%ID^E:9.61e-54^RecName: Full=Splicing factor U2af small subunit B;^Eukaryota; Viridiplantae; Streptophyta; Embryophyta; Tracheophyta; Spermatophyta; Magnoliopsida; eudicotyledons; Gunneridae; Pentapetalae; rosids; malvids; Brassicales; Brassicaceae; Camelineae; Arabidopsis	0.185076	0.00843664	-0.260197	-0.87391	-0.423266	1.47261	2.00796	0.163804	0.286718	0.367638	0.181048	-0.0101587	0.772639	0.297906	-2.03704	-0.670722	-1.46854
1	Nsylvestris_NODE_10649_length_2031_cov_222	VPE_CITSI^VPE_CITSI^Q:1913-444,H:1-494^76.056%ID^E:0^RecName: Full=Vacuolar-processing enzyme;^Eukaryota; Viridiplantae; Streptophyta; Embryophyta; Tracheophyta; Spermatophyta; Magnoliopsida; eudicotyledons; Gunneridae; Pentapetalae; rosids; malvids; Sapindales; Rutaceae; Aurantioideae; Citrus	1.80097	-0.499899	-0.113264	-0.483406	0.476195	-1.49561	0.747394	0.867183	1.05477	0.462063	2.22445	-0.324878	2.54444	2.41991	-4.27971	-0.998207	-4.40239
1	Nsylvestris_NODE_1065_length_4865_cov_57	PPR56_ARATH^PPR56_ARATH^Q:4864-3545,H:282-718^50.794%ID^E:3.34e-139^RecName: Full=Pentatricopeptide repeat-containing protein At1g22960, mitochondrial;^Eukaryota; Viridiplantae; Streptophyta; Embryophyta; Tracheophyta; Spermatophyta; Magnoliopsida; eudicotyledons; Gunneridae; Pentapetalae; rosids; malvids; Brassicales; Brassicaceae; Camelineae; Arabidopsis`PPR56_ARATH^PPR56_ARATH^Q:4762-3608,H:17…	0.640463	1.02205	0.44402	-0.150008	0.410895	1.62508	2.42193	1.16515	0.764158	0.6197	0.740457	0.940043	1.27897	0.737394	-4.86757	-4.28497	-3.50776
1	Nsylvestris_NODE_10650_length_2031_cov_196	DPB2_ARATH^DPB2_ARATH^Q:148-1689,H:18-526^68.677%ID^E:0^RecName: Full=DNA polymerase epsilon subunit B;^Eukaryota; Viridiplantae; Streptophyta; Embryophyta; Tracheophyta; Spermatophyta; Magnoliopsida; eudicotyledons; Gunneridae; Pentapetalae; rosids; malvids; Brassicales; Brassicaceae; Camelineae; Arabidopsis	1.33451	0.649056	1.22985	0.440496	1.32496	1.04135	2.55285	1.34475	0.112036	0.665878	1.06992	1.3237	-0.356191	0.806528	-4.51323	-4.51323	-4.51323
1	Nsylvestris_NODE_10651_length_2031_cov_180	ADCK1_HUMAN^ADCK1_HUMAN^Q:455-1591,H:82-457^29.949%ID^E:7.22e-42^RecName: Full=Uncharacterized aarF domain-containing protein kinase 1;^Eukaryota; Metazoa; Chordata; Craniata; Vertebrata; Euteleostomi; Mammalia; Eutheria; Euarchontoglires; Primates; Haplorrhini; Catarrhini; Hominidae; Homo	0.536713	0.732913	1.50308	-0.144192	0.548678	0.953601	2.13054	2.067	0.479814	0.189717	0.762347	-0.555365	-0.761303	-1.56099	-1.84589	-2.62288	-2.41378
1	Nsylvestris_NODE_10652_length_2031_cov_178	AHL6_ARATH^AHL6_ARATH^Q:1097-498,H:88-288^58.373%ID^E:1.38e-57^RecName: Full=AT-hook motif nuclear-localized protein 6 {ECO:0000312|EMBL:FAA00277.1};^Eukaryota; Viridiplantae; Streptophyta; Embryophyta; Tracheophyta; Spermatophyta; Magnoliopsida; eudicotyledons; Gunneridae; Pentapetalae; rosids; malvids; Brassicales; Brassicaceae; Camelineae; Arabidopsis	-0.22945	1.26794	-0.0205339	-0.307759	-0.672372	1.85691	2.19218	0.883646	0.867211	0.901032	0.235395	1.42497	0.88938	0.616981	-2.11075	-3.89739	-3.89739
1	Nsylvestris_NODE_10656_length_2031_cov_99	14310_SOLLC^14310_SOLLC^Q:187-666,H:7-166^92.5%ID^E:2.04e-97^RecName: Full=14-3-3 protein 10;^Eukaryota; Viridiplantae; Streptophyta; Embryophyta; Tracheophyta; Spermatophyta; Magnoliopsida; eudicotyledons; Gunneridae; Pentapetalae; asterids; lamiids; Solanales; Solanaceae; Solanoideae; Solaneae; Solanum; Lycopersicon	0.719015	1.28954	0.688421	-0.197255	0.345669	1.39136	2.01074	1.91075	0.977789	1.25919	0.95353	0.42543	0.410494	0.102155	-3.69588	-3.70803	-4.88292
1	Nsylvestris_NODE_10657_length_2031_cov_53	HMGCL_ARATH^HMGCL_ARATH^Q:150-356,H:392-457^46.377%ID^E:2.39e-06^RecName: Full=Hydroxymethylglutaryl-CoA lyase, mitochondrial;^Eukaryota; Viridiplantae; Streptophyta; Embryophyta; Tracheophyta; Spermatophyta; Magnoliopsida; eudicotyledons; Gunneridae; Pentapetalae; rosids; malvids; Brassicales; Brassicaceae; Camelineae; Arabidopsis	0.724338	1.13938	-0.445587	-0.445587	0.139375	1.01384	2.57678	1.64188	0.361768	1.19827	0.724338	0.254852	1.19827	0.254852	-3.44559	-3.44559	-3.44559
1	Nsylvestris_NODE_10658_length_2031_cov_39	SSY4_ARATH^SSY4_ARATH^Q:1760-285,H:542-1027^44%ID^E:8.91e-127^RecName: Full=Probable starch synthase 4, chloroplastic/amyloplastic {ECO:0000305};^Eukaryota; Viridiplantae; Streptophyta; Embryophyta; Tracheophyta; Spermatophyta; Magnoliopsida; eudicotyledons; Gunneridae; Pentapetalae; rosids; malvids; Brassicales; Brassicaceae; Camelineae; Arabidopsis	0.506901	0.702437	1.29188	0.70772	0.504143	0.343711	2.84243	2.96713	0.636468	-0.127959	-0.618529	0.785647	1.58884	0.479643	-4.20349	-4.20349	-4.20349
1	Nsylvestris_NODE_10660_length_2030_cov_188	EML3_ARATH^EML3_ARATH^Q:1744-563,H:1-395^51.574%ID^E:3.03e-108^RecName: Full=Protein EMSY-LIKE 3 {ECO:0000303|PubMed:21830950};^Eukaryota; Viridiplantae; Streptophyta; Embryophyta; Tracheophyta; Spermatophyta; Magnoliopsida; eudicotyledons; Gunneridae; Pentapetalae; rosids; malvids; Brassicales; Brassicaceae; Camelineae; Arabidopsis	0.628204	0.83825	0.3947	0.811264	0.965487	1.54566	2.56879	1.96237	1.23817	1.14947	0.829016	1.02359	1.18987	0.698454	-4.51547	-6.20253	-5.12529
1	Nsylvestris_NODE_10661_length_2030_cov_155	.	1.30373	-0.625686	0.575948	-0.625686	0.75338	-0.488183	1.09678	0.444703	0.0523858	0.621026	2.12963	0.497318	3.94283	-0.420294	-2.94761	-3.94761	-2.36265
1	Nsylvestris_NODE_10664_length_2030_cov_104	WRK44_ARATH^WRK44_ARATH^Q:1772-447,H:1-405^40.217%ID^E:1.77e-83^RecName: Full=WRKY transcription factor 44;^Eukaryota; Viridiplantae; Streptophyta; Embryophyta; Tracheophyta; Spermatophyta; Magnoliopsida; eudicotyledons; Gunneridae; Pentapetalae; rosids; malvids; Brassicales; Brassicaceae; Camelineae; Arabidopsis`WRK44_ARATH^WRK44_ARATH^Q:656-435,H:152-224^50%ID^E:5.09e-14^RecName: Full=WRKY tran…	-1.81526	0.753317	1.28112	0.410457	0.369761	-1.6077	-0.870737	-2.19266	0.890208	1.52936	1.07187	0.900219	0.841375	0.805892	-1.2152	0.26834	-1.42036
1	Nsylvestris_NODE_10665_length_2030_cov_58	PKS1_ARATH^PKS1_ARATH^Q:321-1421,H:79-400^32.663%ID^E:2.71e-35^RecName: Full=Protein PHYTOCHROME KINASE SUBSTRATE 1;^Eukaryota; Viridiplantae; Streptophyta; Embryophyta; Tracheophyta; Spermatophyta; Magnoliopsida; eudicotyledons; Gunneridae; Pentapetalae; rosids; malvids; Brassicales; Brassicaceae; Camelineae; Arabidopsis	1.53249	1.2753	1.25846	0.649047	0.854559	0.762928	1.86561	2.11759	1.19027	0.107943	1.47605	0.877678	1.62778	-0.0922764	-5.16781	-5.16781	-5.16781
1	Nsylvestris_NODE_10666_length_2030_cov_58	WRIP1_RAT^WRIP1_RAT^Q:413-1669,H:225-655^51.376%ID^E:6.49e-141^RecName: Full=ATPase WRNIP1;^Eukaryota; Metazoa; Chordata; Craniata; Vertebrata; Euteleostomi; Mammalia; Eutheria; Euarchontoglires; Glires; Rodentia; Myomorpha; Muroidea; Muridae; Murinae; Rattus	1.47479	1.33078	0.474793	-0.917524	-0.110169	1.54191	2.29193	1.8104	0.541907	0.252401	-0.0106336	1.03667	1.2524	-0.217084	-3.91752	-2.91752	-3.91752
1	Nsylvestris_NODE_1067_length_4859_cov_230	RENT1_ARATH^RENT1_ARATH^Q:4642-911,H:1-1228^79.153%ID^E:0^RecName: Full=Regulator of nonsense transcripts 1 homolog;^Eukaryota; Viridiplantae; Streptophyta; Embryophyta; Tracheophyta; Spermatophyta; Magnoliopsida; eudicotyledons; Gunneridae; Pentapetalae; rosids; malvids; Brassicales; Brassicaceae; Camelineae; Arabidopsis	0.638449	0.964939	-0.263622	0.0449716	0.583011	0.982913	1.84277	0.348775	0.882109	0.766892	0.664415	0.439346	0.868904	0.287999	-2.90964	-2.81884	-3.3234
1	Nsylvestris_NODE_10671_length_2029_cov_215	.	0.622319	1.3989	1.004	0.748518	1.14852	0.109869	1.22084	0.734152	1.08344	0.83327	0.353136	1.1372	0.615752	0.363377	-3.78653	-3.60413	-3.98265
1	Nsylvestris_NODE_10674_length_2029_cov_146	XPT_ARATH^XPT_ARATH^Q:121-246,H:362-403^50%ID^E:1.24e-09^RecName: Full=Xylulose 5-phosphate/phosphate translocator, chloroplastic;^Eukaryota; Viridiplantae; Streptophyta; Embryophyta; Tracheophyta; Spermatophyta; Magnoliopsida; eudicotyledons; Gunneridae; Pentapetalae; rosids; malvids; Brassicales; Brassicaceae; Camelineae; Arabidopsis`XPT_ARATH^XPT_ARATH^Q:44-118,H:336-360^60%ID^E:1.24e-09^RecNa…	1.02489	0.650495	0.0655324	0.419169	-0.403953	1.75359	2.98307	1.41917	1.10506	0.48057	0.98307	0.539464	0.539464	0.753588	-4.10439	-4.10439	-4.10439
1	Nsylvestris_NODE_10675_length_2029_cov_91	SPT_ARATH^SPT_ARATH^Q:1451-1098,H:160-279^70.833%ID^E:3.84e-39^RecName: Full=Transcription factor SPATULA;^Eukaryota; Viridiplantae; Streptophyta; Embryophyta; Tracheophyta; Spermatophyta; Magnoliopsida; eudicotyledons; Gunneridae; Pentapetalae; rosids; malvids; Brassicales; Brassicaceae; Camelineae; Arabidopsis	0.740057	0.32502	0.155095	-0.259943	-0.522977	0.477023	1.40302	1.79895	1.16677	1.05717	2.06247	0.477023	0.478465	-0.823425	-2.84491	-2.84491	-2.84491
1	Nsylvestris_NODE_10676_length_2029_cov_78	SH3P2_ARATH^SH3P2_ARATH^Q:1866-1444,H:1-140^81.56%ID^E:4.43e-64^RecName: Full=SH3 domain-containing protein 2 {ECO:0000312|EMBL:AAL32439.1};^Eukaryota; Viridiplantae; Streptophyta; Embryophyta; Tracheophyta; Spermatophyta; Magnoliopsida; eudicotyledons; Gunneridae; Pentapetalae; rosids; malvids; Brassicales; Brassicaceae; Camelineae; Arabidopsis	0.12518	0.0142059	-0.693503	-0.332695	0.400957	0.998795	1.97537	0.711095	-0.0206187	-0.174506	-0.18232	-0.0658321	0.731496	-0.587617	-0.612943	-1.44495	-0.842108
1	Nsylvestris_NODE_10677_length_2029_cov_42	WTF1_MAIZE^WTF1_MAIZE^Q:1406-465,H:80-386^40.312%ID^E:4.31e-48^RecName: Full=Protein WHAT'S THIS FACTOR 1, chloroplastic {ECO:0000303|PubMed:19251672};^Eukaryota; Viridiplantae; Streptophyta; Embryophyta; Tracheophyta; Spermatophyta; Magnoliopsida; Liliopsida; Poales; Poaceae; PACMAD clade; Panicoideae; Andropogonodae; Andropogoneae; Tripsacinae; Zea	0.219755	1.90853	-0.666588	-0.0169589	0.438765	2.06532	2.40236	0.932874	0.370758	0.360893	0.184768	1.36089	0.890646	0.850673	-3.76757	-3.76757	-3.76757
1	Nsylvestris_NODE_10678_length_2029_cov_38	TBL10_ARATH^TBL10_ARATH^Q:437-1507,H:106-463^64.067%ID^E:5.71e-175^RecName: Full=Protein trichome birefringence-like 10;^Eukaryota; Viridiplantae; Streptophyta; Embryophyta; Tracheophyta; Spermatophyta; Magnoliopsida; eudicotyledons; Gunneridae; Pentapetalae; rosids; malvids; Brassicales; Brassicaceae; Camelineae; Arabidopsis	0.554779	0.459029	0.184808	-1.23063	-0.0073217	1.43267	2.12461	1.88571	1.29843	0.882746	0.977477	1.07321	1.49003	0.643692	-4.39895	-2.97135	-4.39895
1	Nsylvestris_NODE_1068_length_4859_cov_121	HNRPQ_HUMAN^HNRPQ_HUMAN^Q:3115-3549,H:278-414^33.108%ID^E:5.55e-14^RecName: Full=Heterogeneous nuclear ribonucleoprotein Q;^Eukaryota; Metazoa; Chordata; Craniata; Vertebrata; Euteleostomi; Mammalia; Eutheria; Euarchontoglires; Primates; Haplorrhini; Catarrhini; Hominidae; Homo	0.556106	0.518722	-0.634132	-0.5881	0.272818	0.636225	1.47953	0.598948	0.656189	0.881572	0.390978	0.185382	0.855946	0.529169	-1.98363	-2.03855	-2.31717
1	Nsylvestris_NODE_10682_length_2028_cov_45	GATL7_ARATH^GATL7_ARATH^Q:1381-2028,H:56-266^66.667%ID^E:5.67e-92^RecName: Full=Probable galacturonosyltransferase-like 7;^Eukaryota; Viridiplantae; Streptophyta; Embryophyta; Tracheophyta; Spermatophyta; Magnoliopsida; eudicotyledons; Gunneridae; Pentapetalae; rosids; malvids; Brassicales; Brassicaceae; Camelineae; Arabidopsis	-0.243887	0.782045	0.979501	-0.496839	0.352081	1.70054	2.7143	1.51352	0.456686	1.04594	0.548185	-0.0123035	-1.70681	1.22802	-2.27742	-3.29177	-3.29177
1	Nsylvestris_NODE_10683_length_2026_cov_40	.	-0.293908	0.764408	-0.178431	-0.0278715	-0.0510518	1.38341	2.00206	0.320409	2.07533	1.98878	0.945897	0.660908	1.18031	0.866366	-3.87887	-3.87887	-3.87887
1	Nsylvestris_NODE_10684_length_2027_cov_220	PME40_ARATH^PME40_ARATH^Q:394-1812,H:46-518^54.49%ID^E:0^RecName: Full=Probable pectinesterase/pectinesterase inhibitor 40;^Eukaryota; Viridiplantae; Streptophyta; Embryophyta; Tracheophyta; Spermatophyta; Magnoliopsida; eudicotyledons; Gunneridae; Pentapetalae; rosids; malvids; Brassicales; Brassicaceae; Camelineae; Arabidopsis	-2.10187	0.705483	1.22006	1.06805	1.89813	3.06805	4.18353	2.29045	-0.101871	-1.10187	-1.10187	-1.10187	-0.516909	-2.10187	-2.10187	-2.10187	-2.10187
1	Nsylvestris_NODE_10685_length_2027_cov_218	RH40_ARATH^RH40_ARATH^Q:2-610,H:639-846^76.777%ID^E:1.01e-88^RecName: Full=DEAD-box ATP-dependent RNA helicase 40;^Eukaryota; Viridiplantae; Streptophyta; Embryophyta; Tracheophyta; Spermatophyta; Magnoliopsida; eudicotyledons; Gunneridae; Pentapetalae; rosids; malvids; Brassicales; Brassicaceae; Camelineae; Arabidopsis	1.36298	0.991859	-0.439824	0.321366	0.837087	1.56837	2.27653	0.229696	1.00346	1.27544	0.678412	0.834063	1.08211	0.835613	-4.2079	-3.90015	-4.74913
1	Nsylvestris_NODE_10686_length_2027_cov_189	NILP3_ARATH^NILP3_ARATH^Q:325-1320,H:38-369^80.422%ID^E:0^RecName: Full=Omega-amidase, chloroplastic;^Eukaryota; Viridiplantae; Streptophyta; Embryophyta; Tracheophyta; Spermatophyta; Magnoliopsida; eudicotyledons; Gunneridae; Pentapetalae; rosids; malvids; Brassicales; Brassicaceae; Camelineae; Arabidopsis	0.441571	1.06661	0.308887	-0.170007	0.473335	0.601938	1.41678	1.02393	0.444766	0.144301	0.439121	0.132219	-0.069328	-0.548638	-1.8673	-1.78159	-2.05659
1	Nsylvestris_NODE_10688_length_2027_cov_96	MUTYH_ARATH^MUTYH_ARATH^Q:216-1436,H:117-529^57.243%ID^E:1.91e-156^RecName: Full=Adenine DNA glycosylase;^Eukaryota; Viridiplantae; Streptophyta; Embryophyta; Tracheophyta; Spermatophyta; Magnoliopsida; eudicotyledons; Gunneridae; Pentapetalae; rosids; malvids; Brassicales; Brassicaceae; Camelineae; Arabidopsis	0.91104	0.819074	1.53513	0.07066	0.0436555	1.73028	2.0879	1.37665	0.601784	-0.793278	0.78566	0.943867	0.591462	0.675956	-3.79328	-3.79328	-3.79328
1	Nsylvestris_NODE_10689_length_2027_cov_73	SFT2B_HUMAN^SFT2B_HUMAN^Q:262-705,H:3-153^41.447%ID^E:1.02e-22^RecName: Full=Vesicle transport protein SFT2B;^Eukaryota; Metazoa; Chordata; Craniata; Vertebrata; Euteleostomi; Mammalia; Eutheria; Euarchontoglires; Primates; Haplorrhini; Catarrhini; Hominidae; Homo	0.435182	0.774615	0.478874	-0.0113142	0.382592	0.449019	1.82248	1.03398	-0.203057	-0.0721264	-0.309973	-0.103522	0.381905	0.311516	-1.67127	-2.01041	-1.68848
1	Nsylvestris_NODE_1069_length_4858_cov_217	ASNS3_ARATH^ASNS3_ARATH^Q:2157-439,H:1-568^85.192%ID^E:0^RecName: Full=Asparagine synthetase [glutamine-hydrolyzing] 3;^Eukaryota; Viridiplantae; Streptophyta; Embryophyta; Tracheophyta; Spermatophyta; Magnoliopsida; eudicotyledons; Gunneridae; Pentapetalae; rosids; malvids; Brassicales; Brassicaceae; Camelineae; Arabidopsis	0.388381	0.656514	0.80629	-0.111587	0.641713	1.87134	2.36456	1.35781	0.507351	0.102774	0.394632	0.18522	0.906822	0.18105	-4.04027	-2.52361	-3.689
1	Nsylvestris_NODE_10690_length_2027_cov_66	.	0.876657	0.516079	-0.243536	-0.289783	-0.620315	0.829019	1.19159	0.481095	-0.319173	1.02166	0.736459	0.506661	0.541876	0.296174	-1.86508	-1.6954	-1.96398
1	Nsylvestris_NODE_10691_length_2027_cov_40	.	0.651271	0.709495	0.592022	0.864218	0.10887	0.902878	1.47902	-0.290177	0.948888	2.39739	1.10563	0.831441	1.86922	0.474586	-4.74961	-4.14554	-3.74961
1	Nsylvestris_NODE_10692_length_2027_cov_14	RNHX1_ARATH^RNHX1_ARATH^Q:575-979,H:1-135^38.519%ID^E:6.75e-29^RecName: Full=Putative ribonuclease H protein At1g65750;^Eukaryota; Viridiplantae; Streptophyta; Embryophyta; Tracheophyta; Spermatophyta; Magnoliopsida; eudicotyledons; Gunneridae; Pentapetalae; rosids; malvids; Brassicales; Brassicaceae; Camelineae; Arabidopsis`RNHX1_ARATH^RNHX1_ARATH^Q:1448-1594,H:293-341^32.653%ID^E:6.75e-29^RecNa…	0.503513	1.31087	-0.496487	-1.49649	-1.08506	0.91855	1.4396	0.240479	0.825441	1.36613	1.16648	1.63664	0.181585	0.148138	-1.49649	-3.08145	-2.08145
1	Nsylvestris_NODE_10694_length_2026_cov_202	ADHL7_ARATH^ADHL7_ARATH^Q:1139-222,H:83-389^68.73%ID^E:5.43e-153^RecName: Full=Alcohol dehydrogenase-like 7;^Eukaryota; Viridiplantae; Streptophyta; Embryophyta; Tracheophyta; Spermatophyta; Magnoliopsida; eudicotyledons; Gunneridae; Pentapetalae; rosids; malvids; Brassicales; Brassicaceae; Camelineae; Arabidopsis`ADHL7_ARATH^ADHL7_ARATH^Q:1797-1582,H:10-82^73.973%ID^E:2.16e-27^RecName: Full=Alco…	0.399399	-0.477107	-1.19068	-1.26965	-0.442963	2.5357	3.45591	3.73115	1.52537	1.53543	1.83542	1.42608	2.44366	2.20137	-5.20126	-6.77173	-5.7361
1	Nsylvestris_NODE_10695_length_2026_cov_175	NSE4A_ARATH^NSE4A_ARATH^Q:1643-663,H:59-388^56.193%ID^E:4.64e-118^RecName: Full=Non-structural maintenance of chromosomes element 4 homolog A;^Eukaryota; Viridiplantae; Streptophyta; Embryophyta; Tracheophyta; Spermatophyta; Magnoliopsida; eudicotyledons; Gunneridae; Pentapetalae; rosids; malvids; Brassicales; Brassicaceae; Camelineae; Arabidopsis	0.878884	0.486631	0.488664	0.135127	0.199157	1.09031	2.04144	1.82161	1.07558	0.647333	1.22031	0.925406	1.37254	0.569859	-5.0657	-3.74802	-4.13914
1	Nsylvestris_NODE_107_length_8362_cov_49	ATR_ARATH^ATR_ARATH^Q:8351-882,H:237-2702^63%ID^E:0^RecName: Full=Serine/threonine-protein kinase ATR;^Eukaryota; Viridiplantae; Streptophyta; Embryophyta; Tracheophyta; Spermatophyta; Magnoliopsida; eudicotyledons; Gunneridae; Pentapetalae; rosids; malvids; Brassicales; Brassicaceae; Camelineae; Arabidopsis	1.46515	1.66166	-0.397912	-0.0327165	-1.10075	1.13234	2.33228	0.170817	0.408316	0.534652	1.2477	1.6261	1.13	1.03934	-4.07711	-4.07711	-3.06276
1	Nsylvestris_NODE_10701_length_2025_cov_209	ADHX_ARATH^ADHX_ARATH^Q:357-1484,H:1-376^90.957%ID^E:0^RecName: Full=Alcohol dehydrogenase class-3;^Eukaryota; Viridiplantae; Streptophyta; Embryophyta; Tracheophyta; Spermatophyta; Magnoliopsida; eudicotyledons; Gunneridae; Pentapetalae; rosids; malvids; Brassicales; Brassicaceae; Camelineae; Arabidopsis	0.962147	1.22387	-0.245485	0.295005	1.28309	2.02549	2.32139	1.67577	0.903774	1.27622	0.109155	0.753836	1.07304	0.526208	-4.88347	-4.30181	-4.99822
1	Nsylvestris_NODE_10703_length_2025_cov_132	PGLT1_HUMAN^PGLT1_HUMAN^Q:1404-427,H:52-375^28.28%ID^E:3.34e-28^RecName: Full=Protein O-glucosyltransferase 1 {ECO:0000305};^Eukaryota; Metazoa; Chordata; Craniata; Vertebrata; Euteleostomi; Mammalia; Eutheria; Euarchontoglires; Primates; Haplorrhini; Catarrhini; Hominidae; Homo	1.62703	0.600562	-0.452776	-2.56936	-0.9844	1.0156	2.91176	2.95608	0.836176	0.752565	0.418564	0.933137	1.11358	1.30445	-4.15433	-2.15433	-4.15433
1	Nsylvestris_NODE_10704_length_2025_cov_127	TL19_ARATH^TL19_ARATH^Q:816-373,H:79-226^81.081%ID^E:2.41e-82^RecName: Full=Thylakoid lumenal 19 kDa protein, chloroplastic;^Eukaryota; Viridiplantae; Streptophyta; Embryophyta; Tracheophyta; Spermatophyta; Magnoliopsida; eudicotyledons; Gunneridae; Pentapetalae; rosids; malvids; Brassicales; Brassicaceae; Camelineae; Arabidopsis	1.91521	0.71349	-0.614086	-0.177433	0.0820786	1.39283	1.75694	1.0342	1.74617	1.1114	1.1366	0.530462	1.41394	0.425727	-3.30375	-4.62747	-4.53632
1	Nsylvestris_NODE_10705_length_2024_cov_232	SCD1_ARATH^SCD1_ARATH^Q:1738-2,H:1-570^71.503%ID^E:0^RecName: Full=DENN domain and WD repeat-containing protein SCD1 {ECO:0000305};^Eukaryota; Viridiplantae; Streptophyta; Embryophyta; Tracheophyta; Spermatophyta; Magnoliopsida; eudicotyledons; Gunneridae; Pentapetalae; rosids; malvids; Brassicales; Brassicaceae; Camelineae; Arabidopsis	0.0377969	0.566493	0.609118	0.291612	0.834969	0.0115727	1.13386	0.380194	0.900892	0.336473	0.484151	1.07764	0.784505	0.0931395	-2.30031	-2.88698	-2.35513
1	Nsylvestris_NODE_10708_length_2022_cov_208	NFRKB_HUMAN^NFRKB_HUMAN^Q:398-1117,H:445-651^38.843%ID^E:6.43e-42^RecName: Full=Nuclear factor related to kappa-B-binding protein;^Eukaryota; Metazoa; Chordata; Craniata; Vertebrata; Euteleostomi; Mammalia; Eutheria; Euarchontoglires; Primates; Haplorrhini; Catarrhini; Hominidae; Homo	0.995079	1.50349	0.975567	0.525419	0.676334	1.001	2.46626	1.98342	1.36228	1.31676	1.73731	0.162849	0.67851	0.736264	-5.37351	-5.37351	-5.37351
1	Nsylvestris_NODE_1071_length_4854_cov_182	SUS1_SOLTU^SUS1_SOLTU^Q:2698-284,H:1-805^94.658%ID^E:0^RecName: Full=Sucrose synthase;^Eukaryota; Viridiplantae; Streptophyta; Embryophyta; Tracheophyta; Spermatophyta; Magnoliopsida; eudicotyledons; Gunneridae; Pentapetalae; asterids; lamiids; Solanales; Solanaceae; Solanoideae; Solaneae; Solanum	0.291195	0.679812	-0.392838	-0.723405	0.182552	0.360307	1.02341	0.491774	1.04788	0.87221	0.676364	-0.106617	1.19437	0.505165	-3.29035	-0.533272	-2.27856
1	Nsylvestris_NODE_10710_length_2024_cov_126	RLP44_ARATH^RLP44_ARATH^Q:1382-615,H:17-274^71.705%ID^E:2.71e-102^RecName: Full=Receptor-like protein 44 {ECO:0000303|PubMed:18434605};^Eukaryota; Viridiplantae; Streptophyta; Embryophyta; Tracheophyta; Spermatophyta; Magnoliopsida; eudicotyledons; Gunneridae; Pentapetalae; rosids; malvids; Brassicales; Brassicaceae; Camelineae; Arabidopsis	2.02195	1.16446	0.652603	-0.0460799	0.559461	0.560495	1.34485	0.92771	1.26272	1.21097	0.457115	1.28229	1.76296	-0.43486	-4.24221	-4.24221	-4.24221
1	Nsylvestris_NODE_10713_length_2024_cov_54	IDD3_ARATH^IDD3_ARATH^Q:348-1712,H:33-506^54.397%ID^E:3.36e-144^RecName: Full=Zinc finger protein MAGPIE {ECO:0000303|PubMed:17785527};^Eukaryota; Viridiplantae; Streptophyta; Embryophyta; Tracheophyta; Spermatophyta; Magnoliopsida; eudicotyledons; Gunneridae; Pentapetalae; rosids; malvids; Brassicales; Brassicaceae; Camelineae; Arabidopsis	1.56723	1.69595	1.78439	0.658338	1.22309	1.04167	1.50982	1.26406	0.862424	-0.695299	1.49215	-0.054781	1.6674	-0.339155	-4.86522	-4.86522	-3.94684
1	Nsylvestris_NODE_1072_length_4854_cov_150	ISOA2_ARATH^ISOA2_ARATH^Q:458-2845,H:71-877^55.092%ID^E:0^RecName: Full=Isoamylase 2, chloroplastic;^Eukaryota; Viridiplantae; Streptophyta; Embryophyta; Tracheophyta; Spermatophyta; Magnoliopsida; eudicotyledons; Gunneridae; Pentapetalae; rosids; malvids; Brassicales; Brassicaceae; Camelineae; Arabidopsis	0.228547	0.987516	0.249348	-0.44258	0.35014	1.30857	2.02198	0.991362	0.535584	0.487589	0.572641	0.571341	0.44825	0.114711	-2.51697	-2.87205	-3.03597
1	Nsylvestris_NODE_10721_length_2023_cov_122	COX15_ARATH^COX15_ARATH^Q:377-1180,H:54-317^82.09%ID^E:2.62e-152^RecName: Full=Cytochrome c oxidase assembly protein COX15;^Eukaryota; Viridiplantae; Streptophyta; Embryophyta; Tracheophyta; Spermatophyta; Magnoliopsida; eudicotyledons; Gunneridae; Pentapetalae; rosids; malvids; Brassicales; Brassicaceae; Camelineae; Arabidopsis`COX15_ARATH^COX15_ARATH^Q:1234-1356,H:316-356^82.927%ID^E:6.77e-14^R…	-1.53499	0.472933	-1.58976	-0.674689	0.128044	1.50626	2.09063	0.471718	0.0980314	0.927663	0.385603	-0.402599	-0.234471	0.362181	-0.931814	-0.88903	-0.18571
1	Nsylvestris_NODE_10723_length_2023_cov_62	BUB1_ARATH^BUB1_ARATH^Q:1888-350,H:13-525^59.923%ID^E:0^RecName: Full=Mitotic checkpoint serine/threonine-protein kinase BUB1;^Eukaryota; Viridiplantae; Streptophyta; Embryophyta; Tracheophyta; Spermatophyta; Magnoliopsida; eudicotyledons; Gunneridae; Pentapetalae; rosids; malvids; Brassicales; Brassicaceae; Camelineae; Arabidopsis	0.206343	0.16779	-0.0988559	0.146595	0.226683	1.6052	0.226683	0.226683	2.24745	1.99222	2.25667	-0.57923	-2.09524	-2.09524	-0.243246	-2.09524	-2.09524
1	Nsylvestris_NODE_10725_length_2023_cov_36	PP184_ARATH^PP184_ARATH^Q:39-1883,H:1-614^52.174%ID^E:0^RecName: Full=Pentatricopeptide repeat-containing protein At2g34400;^Eukaryota; Viridiplantae; Streptophyta; Embryophyta; Tracheophyta; Spermatophyta; Magnoliopsida; eudicotyledons; Gunneridae; Pentapetalae; rosids; malvids; Brassicales; Brassicaceae; Camelineae; Arabidopsis	0.249651	1.3071	1.39614	-1.75035	-0.285681	2.13912	1.88773	0.427569	0.539486	0.0109365	0.770702	0.864361	-0.14154	0.835815	-2.75035	-2.75035	-2.75035
1	Nsylvestris_NODE_10726_length_2023_cov_15	AB9C_ARATH^AB9C_ARATH^Q:2021-3,H:703-1372^72.997%ID^E:0^RecName: Full=ABC transporter C family member 9;^Eukaryota; Viridiplantae; Streptophyta; Embryophyta; Tracheophyta; Spermatophyta; Magnoliopsida; eudicotyledons; Gunneridae; Pentapetalae; rosids; malvids; Brassicales; Brassicaceae; Camelineae; Arabidopsis`AB9C_ARATH^AB9C_ARATH^Q:1976-1587,H:1336-1483^26.174%ID^E:1.05e-07^RecName: Full=ABC tr…	1.1622	1.14183	2.36806	1.5607	1.8231	-1.36453	2.00118	1.8199	0.222862	-2.35003	-1.15468	-0.906421	0.246907	-2.35003	-0.658494	-1.21252	-2.35003
1	Nsylvestris_NODE_10727_length_2022_cov_221	E132_ARATH^E132_ARATH^Q:253-1662,H:27-497^72.034%ID^E:0^RecName: Full=Glucan endo-1,3-beta-glucosidase 2;^Eukaryota; Viridiplantae; Streptophyta; Embryophyta; Tracheophyta; Spermatophyta; Magnoliopsida; eudicotyledons; Gunneridae; Pentapetalae; rosids; malvids; Brassicales; Brassicaceae; Camelineae; Arabidopsis	1.39196	1.87088	-0.754534	0.402105	0.91874	2.57638	2.77153	1.24547	0.488069	0.757061	0.245466	0.375161	1.27271	0.702601	-4.75453	-4.75453	-4.75453
1	Nsylvestris_NODE_10728_length_2022_cov_206	RCA1_TOBAC^RCA1_TOBAC^Q:353-1678,H:1-442^99.548%ID^E:0^RecName: Full=Ribulose bisphosphate carboxylase/oxygenase activase 1, chloroplastic;^Eukaryota; Viridiplantae; Streptophyta; Embryophyta; Tracheophyta; Spermatophyta; Magnoliopsida; eudicotyledons; Gunneridae; Pentapetalae; asterids; lamiids; Solanales; Solanaceae; Nicotianoideae; Nicotianeae; Nicotiana	0.470333	-0.539527	-0.278342	-1.11955	0.397664	1.31269	3.23104	3.62813	0.415559	0.977608	0.977922	-0.164848	0.881681	0.866262	-3.47274	-4.81195	-2.77195
1	Nsylvestris_NODE_1073_length_4850_cov_130	GH36_ARATH^GH36_ARATH^Q:2031-232,H:1-609^77.176%ID^E:0^RecName: Full=Indole-3-acetic acid-amido synthetase GH3.6;^Eukaryota; Viridiplantae; Streptophyta; Embryophyta; Tracheophyta; Spermatophyta; Magnoliopsida; eudicotyledons; Gunneridae; Pentapetalae; rosids; malvids; Brassicales; Brassicaceae; Camelineae; Arabidopsis	0.153066	1.04727	1.31789	-0.277336	0.603578	1.27183	1.99472	1.79814	0.246987	1.06646	0.937534	0.693538	0.803265	0.600219	-4.08572	-4.08572	-4.08572
1	Nsylvestris_NODE_10731_length_2022_cov_130	RH52B_ORYSJ^RH52B_ORYSJ^Q:1910-585,H:147-589^69.128%ID^E:0^RecName: Full=DEAD-box ATP-dependent RNA helicase 52B;^Eukaryota; Viridiplantae; Streptophyta; Embryophyta; Tracheophyta; Spermatophyta; Magnoliopsida; Liliopsida; Poales; Poaceae; BOP clade; Oryzoideae; Oryzeae; Oryzinae; Oryza; Oryza sativa	0.28268	0.461606	0.541922	-0.971817	-0.886809	0.879535	1.81393	1.555	0.632474	-0.145525	-0.29792	0.765983	-1.00984	-2.04012	-0.519224	-0.40363	-0.658252
1	Nsylvestris_NODE_10733_length_2022_cov_103	BC10_ORYSJ^BC10_ORYSJ^Q:859-1653,H:85-389^38.387%ID^E:1.44e-47^RecName: Full=Glycosyltransferase BC10 {ECO:0000305};^Eukaryota; Viridiplantae; Streptophyta; Embryophyta; Tracheophyta; Spermatophyta; Magnoliopsida; Liliopsida; Poales; Poaceae; BOP clade; Oryzoideae; Oryzeae; Oryzinae; Oryza; Oryza sativa	1.09505	1.58229	0.736102	-0.247417	0.0954929	1.94735	2.29763	1.52141	1.14175	0.9424	0.600141	0.582447	1.47147	0.998517	-4.92154	-4.92154	-4.92154
1	Nsylvestris_NODE_10734_length_2022_cov_64	URH2_ARATH^URH2_ARATH^Q:1539-1670,H:280-322^65.909%ID^E:1.85e-07^RecName: Full=Probable uridine nucleosidase 2;^Eukaryota; Viridiplantae; Streptophyta; Embryophyta; Tracheophyta; Spermatophyta; Magnoliopsida; eudicotyledons; Gunneridae; Pentapetalae; rosids; malvids; Brassicales; Brassicaceae; Camelineae; Arabidopsis	0.396923	0.846498	0.412101	-0.431527	0.260851	0.905255	2.08965	1.70691	1.39412	1.13133	1.58251	0.605054	1.3963	1.1005	-4.12976	-4.12976	-5.13695
1	Nsylvestris_NODE_10735_length_2022_cov_23	.	1.1249	1.87978	1.21236	0.584327	-0.553176	1.1249	2.03179	0.29482	-0.290142	0.584327	-0.290142	0.584327	1.21236	-0.875105	-2.8751	-2.8751	-2.8751
1	Nsylvestris_NODE_10737_length_2021_cov_217	IQD1_ARATH^IQD1_ARATH^Q:547-1572,H:97-443^49.435%ID^E:2.3e-68^RecName: Full=Protein IQ-DOMAIN 1 {ECO:0000303|PubMed:15960618};^Eukaryota; Viridiplantae; Streptophyta; Embryophyta; Tracheophyta; Spermatophyta; Magnoliopsida; eudicotyledons; Gunneridae; Pentapetalae; rosids; malvids; Brassicales; Brassicaceae; Camelineae; Arabidopsis	-0.0640842	0.787486	0.351269	0.277027	0.956289	1.17376	2.08269	1.488	0.878484	0.488122	-0.271522	0.288457	1.13516	0.117465	-2.71689	-3.2703	-3.70142
1	Nsylvestris_NODE_10739_length_2021_cov_187	MPI1_ARATH^MPI1_ARATH^Q:1592-351,H:27-429^59.277%ID^E:1.56e-175^RecName: Full=Mannose-6-phosphate isomerase 1;^Eukaryota; Viridiplantae; Streptophyta; Embryophyta; Tracheophyta; Spermatophyta; Magnoliopsida; eudicotyledons; Gunneridae; Pentapetalae; rosids; malvids; Brassicales; Brassicaceae; Camelineae; Arabidopsis	0.360892	1.09348	0.730436	0.887301	1.02326	1.99144	2.45265	1.63575	0.704961	1.02363	0.761659	0.547005	0.36322	0.647377	-5.26934	-5.26934	-3.68438
1	Nsylvestris_NODE_1074_length_4848_cov_193	CPL1_ARATH^CPL1_ARATH^Q:3493-725,H:53-966^60.361%ID^E:0^RecName: Full=RNA polymerase II C-terminal domain phosphatase-like 1 {ECO:0000305};^Eukaryota; Viridiplantae; Streptophyta; Embryophyta; Tracheophyta; Spermatophyta; Magnoliopsida; eudicotyledons; Gunneridae; Pentapetalae; rosids; malvids; Brassicales; Brassicaceae; Camelineae; Arabidopsis	0.79878	0.973343	-0.625067	-0.497579	0.0590931	-0.269437	1.43924	0.462284	0.807371	0.993777	0.682635	0.946514	0.798141	0.401843	-2.04506	-1.82978	-3.0961
1	Nsylvestris_NODE_10741_length_2021_cov_82	PBL10_ARATH^PBL10_ARATH^Q:1195-335,H:51-354^36.218%ID^E:2.39e-54^RecName: Full=Probable serine/threonine-protein kinase PBL10 {ECO:0000305};^Eukaryota; Viridiplantae; Streptophyta; Embryophyta; Tracheophyta; Spermatophyta; Magnoliopsida; eudicotyledons; Gunneridae; Pentapetalae; rosids; malvids; Brassicales; Brassicaceae; Camelineae; Arabidopsis	0.0359985	1.25012	0.435078	0.299033	1.01419	1.036	2.0833	1.74382	-0.795359	-0.272765	0.369422	0.293412	1.99131	1.12911	-3.87089	-3.87089	-2.87089
1	Nsylvestris_NODE_10743_length_2021_cov_35	FB250_ARATH^FB250_ARATH^Q:682-1029,H:136-244^36.441%ID^E:2.37e-19^RecName: Full=F-box protein At5g03100;^Eukaryota; Viridiplantae; Streptophyta; Embryophyta; Tracheophyta; Spermatophyta; Magnoliopsida; eudicotyledons; Gunneridae; Pentapetalae; rosids; malvids; Brassicales; Brassicaceae; Camelineae; Arabidopsis`FB250_ARATH^FB250_ARATH^Q:272-598,H:4-108^36.364%ID^E:2.37e-19^RecName: Full=F-box prot…	0.778614	1.45765	0.680041	-0.319959	0.0426108	-0.127314	1.91708	-0.127314	1.33277	1.04341	0.330805	1.45825	-1.12731	-0.542352	-1.54235	-3.12731	-2.12731
1	Nsylvestris_NODE_10745_length_2020_cov_180	.	2.09183	1.01876	1.07391	-0.0385682	0.0739065	1.10953	2.32941	1.75198	0.706175	0.634621	2.01876	0.243832	1.91185	0.818068	-5.24802	-5.24802	-5.24802
1	Nsylvestris_NODE_10747_length_2020_cov_97	DOF57_ARATH^DOF57_ARATH^Q:221-445,H:33-106^76%ID^E:4.71e-32^RecName: Full=Dof zinc finger protein DOF5.7;^Eukaryota; Viridiplantae; Streptophyta; Embryophyta; Tracheophyta; Spermatophyta; Magnoliopsida; eudicotyledons; Gunneridae; Pentapetalae; rosids; malvids; Brassicales; Brassicaceae; Camelineae; Arabidopsis	0.081048	1.33517	-0.15959	0.222281	0.319578	1.69083	2.12693	1.15357	1.08142	1.43987	1.15357	0.840847	2.0628	0.678659	-3.61902	-5.20398	-5.20398
1	Nsylvestris_NODE_10748_length_2019_cov_73	ZDHC9_ARATH^ZDHC9_ARATH^Q:1023-1172,H:193-242^78%ID^E:1.3e-18^RecName: Full=Probable protein S-acyltransferase 7;^Eukaryota; Viridiplantae; Streptophyta; Embryophyta; Tracheophyta; Spermatophyta; Magnoliopsida; eudicotyledons; Gunneridae; Pentapetalae; rosids; malvids; Brassicales; Brassicaceae; Camelineae; Arabidopsis`ZDHC9_ARATH^ZDHC9_ARATH^Q:1190-1240,H:251-267^88.235%ID^E:1.3e-18^RecName: Ful…	1.82911	1.31454	2.0515	0.622659	0.70777	1.09214	2.05191	1.31454	-0.755853	-0.497635	-0.755853	-1.49282	-0.755853	-2.07778	-2.07778	-1.49282	-1.07778
1	Nsylvestris_NODE_1075_length_4848_cov_117	PPA27_ARATH^PPA27_ARATH^Q:3551-2604,H:296-611^81.646%ID^E:1.68e-169^RecName: Full=Probable inactive purple acid phosphatase 27;^Eukaryota; Viridiplantae; Streptophyta; Embryophyta; Tracheophyta; Spermatophyta; Magnoliopsida; eudicotyledons; Gunneridae; Pentapetalae; rosids; malvids; Brassicales; Brassicaceae; Camelineae; Arabidopsis	0.0456429	0.634449	0.0451855	-0.648964	0.404346	0.876825	1.69715	1.26817	0.602164	0.955906	0.540463	0.247391	1.06032	-0.0020097	-2.26649	-2.63442	-2.82612
1	Nsylvestris_NODE_10750_length_2020_cov_31	CDF2_ARATH^CDF2_ARATH^Q:1792-419,H:6-457^40.039%ID^E:1.52e-76^RecName: Full=Cyclic dof factor 2;^Eukaryota; Viridiplantae; Streptophyta; Embryophyta; Tracheophyta; Spermatophyta; Magnoliopsida; eudicotyledons; Gunneridae; Pentapetalae; rosids; malvids; Brassicales; Brassicaceae; Camelineae; Arabidopsis	2.0072	0.366318	0.366318	-2.44104	0.366318	-1.44104	1.80689	4.08253	1.14393	-0.856074	1.03405	-0.856074	2.18482	-0.441037	-2.44104	-2.44104	-2.44104
1	Nsylvestris_NODE_10752_length_2019_cov_108	AIRP2_ARATH^AIRP2_ARATH^Q:359-925,H:4-192^70.37%ID^E:1.15e-77^RecName: Full=E3 ubiquitin-protein ligase AIRP2 {ECO:0000305};^Eukaryota; Viridiplantae; Streptophyta; Embryophyta; Tracheophyta; Spermatophyta; Magnoliopsida; eudicotyledons; Gunneridae; Pentapetalae; rosids; malvids; Brassicales; Brassicaceae; Camelineae; Arabidopsis`AIRP2_ARATH^AIRP2_ARATH^Q:1447-1620,H:174-231^62.069%ID^E:2.21e-17^…	0.114369	0.199385	0.0835475	-0.18989	0.576791	0.233454	1.1421	1.05992	0.575321	0.890705	0.933932	-0.438766	1.2612	-0.206649	-2.37733	-1.04046	-2.81763
1	Nsylvestris_NODE_10754_length_2019_cov_56	EXOL7_ARATH^EXOL7_ARATH^Q:214-1137,H:21-323^64.516%ID^E:1.95e-126^RecName: Full=Protein EXORDIUM-like 7;^Eukaryota; Viridiplantae; Streptophyta; Embryophyta; Tracheophyta; Spermatophyta; Magnoliopsida; eudicotyledons; Gunneridae; Pentapetalae; rosids; malvids; Brassicales; Brassicaceae; Camelineae; Arabidopsis	1.33073	0.170043	-0.313315	0.255474	0.678217	2.83446	1.96353	1.73415	1.58098	-1.26119	-0.886265	-0.0315049	-0.195242	-1.27053	-2.89346	-2.89346	-0.802607
1	Nsylvestris_NODE_10755_length_2019_cov_55	PARG1_ARATH^PARG1_ARATH^Q:1957-290,H:1-545^57.271%ID^E:0^RecName: Full=Poly(ADP-ribose) glycohydrolase 1;^Eukaryota; Viridiplantae; Streptophyta; Embryophyta; Tracheophyta; Spermatophyta; Magnoliopsida; eudicotyledons; Gunneridae; Pentapetalae; rosids; malvids; Brassicales; Brassicaceae; Camelineae; Arabidopsis	0.371165	1.62825	-0.148209	-0.925817	-0.733172	1.89648	2.37535	2.04819	0.243192	1.05551	0.0885383	2.04241	0.929034	0.328604	-3.73317	-3.73317	-3.73317
1	Nsylvestris_NODE_10757_length_2019_cov_28	.	0.381534	-0.840859	1.15914	0.737677	1.32371	-0.0781557	3.18594	2.47722	-0.103893	-1.42582	-0.37271	0.772673	0.901866	-0.840859	-2.42582	-2.42582	-2.42582
1	Nsylvestris_NODE_10759_length_2018_cov_169	KLC3_PONAB^KLC3_PONAB^Q:1516-911,H:220-421^30.198%ID^E:6.97e-18^RecName: Full=Kinesin light chain 3;^Eukaryota; Metazoa; Chordata; Craniata; Vertebrata; Euteleostomi; Mammalia; Eutheria; Euarchontoglires; Primates; Haplorrhini; Catarrhini; Hominidae; Pongo`KLC3_PONAB^KLC3_PONAB^Q:1294-569,H:210-435^28.395%ID^E:8.68e-08^RecName: Full=Kinesin light chain 3;^Eukaryota; Metazoa; Chordata; Craniata; V…	0.154322	1.01744	0.392708	0.129187	-0.0896226	1.2507	2.03658	1.55155	0.549096	0.619738	0.560098	0.44479	0.295114	-0.151208	-2.19896	-3.80887	-2.75266
1	Nsylvestris_NODE_10760_length_2018_cov_134	P2C02_ORYSJ^P2C02_ORYSJ^Q:938-366,H:185-379^66.154%ID^E:3.33e-82^RecName: Full=Probable protein phosphatase 2C 2;^Eukaryota; Viridiplantae; Streptophyta; Embryophyta; Tracheophyta; Spermatophyta; Magnoliopsida; Liliopsida; Poales; Poaceae; BOP clade; Oryzoideae; Oryzeae; Oryzinae; Oryza; Oryza sativa`P2C02_ORYSJ^P2C02_ORYSJ^Q:1835-1461,H:30-160^54.198%ID^E:2.06e-39^RecName: Full=Probable protein …	0.799118	0.446945	-0.452167	-1.00608	0.170786	1.16944	2.05806	1.5244	1.65802	1.12776	0.71552	1.19452	1.58332	1.02819	-3.34838	-4.49569	-4.17376
1	Nsylvestris_NODE_10761_length_2018_cov_99	ARP1_ARATH^ARP1_ARATH^Q:265-1020,H:5-249^46.097%ID^E:2.41e-52^RecName: Full=Probable RNA-binding protein ARP1;^Eukaryota; Viridiplantae; Streptophyta; Embryophyta; Tracheophyta; Spermatophyta; Magnoliopsida; eudicotyledons; Gunneridae; Pentapetalae; rosids; malvids; Brassicales; Brassicaceae; Camelineae; Arabidopsis	-5.42539	0.000201762	0.776634	0.529037	1.43259	3.30966	3.38986	1.00489	1.23225	0.726994	-5.42539	2.52694	2.09417	0.640697	-2.42359	-1.96596	-2.42359
1	Nsylvestris_NODE_10763_length_2018_cov_72	CHI5_ARATH^CHI5_ARATH^Q:173-571,H:7-139^53.383%ID^E:6.77e-37^RecName: Full=Endochitinase EP3 {ECO:0000303|PubMed:11525512};^Eukaryota; Viridiplantae; Streptophyta; Embryophyta; Tracheophyta; Spermatophyta; Magnoliopsida; eudicotyledons; Gunneridae; Pentapetalae; rosids; malvids; Brassicales; Brassicaceae; Camelineae; Arabidopsis	1.20394	0.873031	0.263226	0.337227	0.538861	1.79626	2.12382	2.54691	0.770186	0.769652	1.93404	-0.177347	1.12382	0.850465	-4.9847	-4.9847	-4.9847
1	Nsylvestris_NODE_10764_length_2018_cov_36	.	0.137482	1.05604	0.508665	-2.18733	-1.18733	1.67065	1.94195	1.76687	0.396431	0.81177	-0.0190074	0.978583	0.539503	-0.0222205	-3.18733	-1.60237	-1.60237
1	Nsylvestris_NODE_10767_length_2017_cov_172	.	1.04492	0.966816	1.98852	0.360451	0.857332	0.685921	1.85699	1.89272	0.356133	1.08462	1.38939	0.316671	0.777045	0.0776372	-4.55172	-4.55172	-4.55172
1	Nsylvestris_NODE_10768_length_2017_cov_164	IST1L_DICDI^IST1L_DICDI^Q:1697-1224,H:12-177^23.81%ID^E:1.82e-07^RecName: Full=IST1-like protein;^Eukaryota; Amoebozoa; Mycetozoa; Dictyostelids; Dictyosteliales; Dictyosteliaceae; Dictyostelium	0.329175	0.487356	2.099	0.535078	0.869536	0.759396	2.15831	1.99737	1.75522	-0.524565	1.15791	0.820493	2.00225	0.363186	-4.16038	-4.33192	-6.31742
1	Nsylvestris_NODE_10770_length_2017_cov_99	PAE8_ARATH^PAE8_ARATH^Q:989-237,H:137-384^57.371%ID^E:4.03e-93^RecName: Full=Pectin acetylesterase 8 {ECO:0000303|PubMed:25115560};^Eukaryota; Viridiplantae; Streptophyta; Embryophyta; Tracheophyta; Spermatophyta; Magnoliopsida; eudicotyledons; Gunneridae; Pentapetalae; rosids; malvids; Brassicales; Brassicaceae; Camelineae; Arabidopsis	0.0356056	0.0388116	0.420645	-0.325361	-0.132715	2.58866	3.03741	2.39179	-0.550159	-0.129113	-0.132715	-0.323301	-0.143576	-1.54775	-2.13272	-1.54775	-1.54775
1	Nsylvestris_NODE_10771_length_2017_cov_93	.	1.06928	1.06392	-0.104512	-0.48008	0.197162	0.982879	1.73589	0.592459	-0.447904	0.177571	-0.381935	-0.23957	-0.117844	0.0238874	-1.86027	-1.66162	-0.549317
1	Nsylvestris_NODE_10772_length_2017_cov_85	PP392_ARATH^PP392_ARATH^Q:1704-244,H:21-505^54.004%ID^E:0^RecName: Full=Pentatricopeptide repeat-containing protein At5g18475;^Eukaryota; Viridiplantae; Streptophyta; Embryophyta; Tracheophyta; Spermatophyta; Magnoliopsida; eudicotyledons; Gunneridae; Pentapetalae; rosids; malvids; Brassicales; Brassicaceae; Camelineae; Arabidopsis	0.181511	0.0544705	-0.605735	-0.813694	0.174068	0.807794	1.55322	1.24389	1.91147	1.56256	-0.214154	2.12757	0.999926	-0.0309821	-1.98983	-3.21847	-3.74362
1	Nsylvestris_NODE_10774_length_2017_cov_43	WTF1_ARATH^WTF1_ARATH^Q:1629-643,H:84-416^31.751%ID^E:5.89e-44^RecName: Full=Protein WHAT'S THIS FACTOR 1 homolog, chloroplastic {ECO:0000305};^Eukaryota; Viridiplantae; Streptophyta; Embryophyta; Tracheophyta; Spermatophyta; Magnoliopsida; eudicotyledons; Gunneridae; Pentapetalae; rosids; malvids; Brassicales; Brassicaceae; Camelineae; Arabidopsis	1.18328	0.444687	0.64445	-0.528867	-0.279485	1.1618	2.14296	0.95926	0.973719	0.682041	1.1354	1.21926	1.44098	0.333775	-3.83775	-3.83775	-3.83775
1	Nsylvestris_NODE_10777_length_2016_cov_170	SIR4_ARATH^SIR4_ARATH^Q:369-1409,H:26-373^71.839%ID^E:5.5e-177^RecName: Full=NAD-dependent protein deacylase SRT2 {ECO:0000255|HAMAP-Rule:MF_03161};^Eukaryota; Viridiplantae; Streptophyta; Embryophyta; Tracheophyta; Spermatophyta; Magnoliopsida; eudicotyledons; Gunneridae; Pentapetalae; rosids; malvids; Brassicales; Brassicaceae; Camelineae; Arabidopsis	0.292473	0.430953	-0.257477	-1.24918	-0.358757	1.48388	3.0836	2.77768	0.113925	-0.183133	0.858918	0.124923	0.299372	0.222257	-2.28448	-2.89434	-2.46059
1	Nsylvestris_NODE_10778_length_2016_cov_154	.	0.943701	0.72372	1.1333	0.148067	0.0551806	0.470768	1.43424	1.12284	0.916343	-0.000589395	0.970696	1.04359	1.10629	0.41691	-4.15009	-3.7006	-2.63437
1	Nsylvestris_NODE_10779_length_2016_cov_154	LCB1_ARATH^LCB1_ARATH^Q:274-1704,H:3-479^74.843%ID^E:0^RecName: Full=Long chain base biosynthesis protein 1;^Eukaryota; Viridiplantae; Streptophyta; Embryophyta; Tracheophyta; Spermatophyta; Magnoliopsida; eudicotyledons; Gunneridae; Pentapetalae; rosids; malvids; Brassicales; Brassicaceae; Camelineae; Arabidopsis	-0.0435916	0.921616	1.21094	-0.601696	0.480286	1.07391	2.1935	1.82129	0.683052	0.454397	0.537079	1.15188	0.413857	-0.177634	-4.73345	-1.94476	-3.44067
1	Nsylvestris_NODE_10782_length_2016_cov_80	.	1.44077	0.918911	0.814265	0.0279721	0.811087	1.05363	1.99117	1.02897	0.952084	0.562273	1.0551	0.822612	1.62894	1.37927	-4.82901	-4.82901	-4.82901
1	Nsylvestris_NODE_10783_length_2016_cov_31	.	-0.286541	0.358108	0.552554	0.426485	1.08741	-0.317013	2.01045	0.506109	0.0454026	0.172767	-0.847528	0.323465	0.326843	-0.868519	-1.65709	-0.642761	-1.19014
1	Nsylvestris_NODE_10787_length_2015_cov_118	LPAT5_ARATH^LPAT5_ARATH^Q:503-1168,H:7-228^63.063%ID^E:9.11e-100^RecName: Full=Probable 1-acyl-sn-glycerol-3-phosphate acyltransferase 5;^Eukaryota; Viridiplantae; Streptophyta; Embryophyta; Tracheophyta; Spermatophyta; Magnoliopsida; eudicotyledons; Gunneridae; Pentapetalae; rosids; malvids; Brassicales; Brassicaceae; Camelineae; Arabidopsis	0.79784	1.00418	0.0056247	-0.569264	1.30436	0.828098	2.07482	2.55139	0.0553043	-0.0453281	0.578502	-0.0971123	0.647072	-0.586577	-2.33423	-2.89982	-3.31486
1	Nsylvestris_NODE_10788_length_2015_cov_92	.	0.94756	0.306014	0.94756	0.662157	0.569048	0.910085	2.30601	0.74962	0.569048	0.616354	1.74962	0.616354	1.49505	0.569048	-4.33784	-4.33784	-4.33784
1	Nsylvestris_NODE_10789_length_2015_cov_66	.	0.512932	1.95575	-0.293977	0.586428	0.376675	1.4019	2.05939	1.03892	0.0135454	1.27041	0.27532	1.50011	-0.488256	0.456634	-2.48588	-4.08995	-4.08995
1	Nsylvestris_NODE_10791_length_2015_cov_34	.	0.73489	0.149928	-1.43503	0.564965	-1.43503	2.47186	3.26679	1.37232	-0.453182	-0.934233	0.185551	-0.850072	0.925329	-1.00743	-1.27154	-1.43503	-0.850072
1	Nsylvestris_NODE_10795_length_2014_cov_175	DRIP2_ARATH^DRIP2_ARATH^Q:1749-484,H:4-416^53.052%ID^E:3.47e-134^RecName: Full=E3 ubiquitin protein ligase DRIP2;^Eukaryota; Viridiplantae; Streptophyta; Embryophyta; Tracheophyta; Spermatophyta; Magnoliopsida; eudicotyledons; Gunneridae; Pentapetalae; rosids; malvids; Brassicales; Brassicaceae; Camelineae; Arabidopsis	-0.0234188	0.960874	0.832264	-0.305392	0.155557	1.07543	1.7535	1.39093	0.270638	0.515024	0.889	0.68182	0.466465	-0.168116	-2.58252	-3.083	-2.82906
1	Nsylvestris_NODE_10796_length_2014_cov_116	YEK9_SCHPO^YEK9_SCHPO^Q:1620-2009,H:85-211^32.308%ID^E:6.58e-13^RecName: Full=Uncharacterized protein C4F10.09c;^Eukaryota; Fungi; Dikarya; Ascomycota; Taphrinomycotina; Schizosaccharomycetes; Schizosaccharomycetales; Schizosaccharomycetaceae; Schizosaccharomyces	0.903436	1.28581	0.844793	0.917846	0.87323	1.59641	2.2457	1.00465	0.475051	0.60555	0.462366	0.819105	0.909448	0.462524	-4.47184	-4.47184	-4.46225
1	Nsylvestris_NODE_10797_length_2014_cov_114	MA655_ARATH^MA655_ARATH^Q:1883-279,H:19-550^55.556%ID^E:9.71e-178^RecName: Full=65-kDa microtubule-associated protein 5;^Eukaryota; Viridiplantae; Streptophyta; Embryophyta; Tracheophyta; Spermatophyta; Magnoliopsida; eudicotyledons; Gunneridae; Pentapetalae; rosids; malvids; Brassicales; Brassicaceae; Camelineae; Arabidopsis	0.00597929	0.348339	0.888118	0.00369111	1.09787	1.9922	1.9922	1.51826	0.0989458	0.815619	-0.655272	-0.815737	0.670267	-0.00549806	-2.65166	-2.65166	-2.65166
1	Nsylvestris_NODE_10798_length_2014_cov_87	.	0.881153	1.00763	0.361779	-0.375187	0.262243	1.97845	3.04735	1.84721	-0.0215496	0.846519	0.584171	0.881153	1.23625	0.0981674	-4.54511	-4.54511	-3.54511
1	Nsylvestris_NODE_10799_length_2014_cov_30	STA1_ARATH^STA1_ARATH^Q:1794-1597,H:938-1003^36.364%ID^E:2.4e-06^RecName: Full=Protein STABILIZED1;^Eukaryota; Viridiplantae; Streptophyta; Embryophyta; Tracheophyta; Spermatophyta; Magnoliopsida; eudicotyledons; Gunneridae; Pentapetalae; rosids; malvids; Brassicales; Brassicaceae; Camelineae; Arabidopsis`STA1_ARATH^STA1_ARATH^Q:1927-1841,H:878-906^37.931%ID^E:2.4e-06^RecName: Full=Protein STABIL…	0.459545	0.681938	0.681938	0.334015	-0.125417	0.681938	2.75723	1.62947	1.45955	-1.12542	0.781474	0.781474	0.334015	0.044508	-3.12542	-3.12542	-3.12542
1	Nsylvestris_NODE_108_length_8357_cov_118	LRP6A_ARATH^LRP6A_ARATH^Q:5393-6442,H:101-410^45.609%ID^E:1.55e-77^RecName: Full=La-related protein 6A;^Eukaryota; Viridiplantae; Streptophyta; Embryophyta; Tracheophyta; Spermatophyta; Magnoliopsida; eudicotyledons; Gunneridae; Pentapetalae; rosids; malvids; Brassicales; Brassicaceae; Camelineae; Arabidopsis	0.801131	0.919119	0.362318	-0.310906	0.509433	0.0644969	1.18261	1.24308	1.0967	1.33144	0.751512	0.603047	1.25718	0.0701612	-3.34083	-2.8121	-3.72838
1	Nsylvestris_NODE_1080_length_4839_cov_38	TRN1_ARATH^TRN1_ARATH^Q:4544-420,H:4-1380^65.609%ID^E:0^RecName: Full=Protein TORNADO 1;^Eukaryota; Viridiplantae; Streptophyta; Embryophyta; Tracheophyta; Spermatophyta; Magnoliopsida; eudicotyledons; Gunneridae; Pentapetalae; rosids; malvids; Brassicales; Brassicaceae; Camelineae; Arabidopsis	0.385888	0.986013	0.778749	0.0787448	0.376713	1.56114	1.79434	-0.364862	-0.126075	-0.0914454	-0.469559	-0.511531	0.203981	-0.325957	-1.20652	-1.46234	-1.60727
1	Nsylvestris_NODE_10801_length_2013_cov_195	HAKAI_ARATH^HAKAI_ARATH^Q:1735-623,H:1-328^50.394%ID^E:5.26e-103^RecName: Full=E3 ubiquitin-protein ligase HAKAI homolog {ECO:0000305};^Eukaryota; Viridiplantae; Streptophyta; Embryophyta; Tracheophyta; Spermatophyta; Magnoliopsida; eudicotyledons; Gunneridae; Pentapetalae; rosids; malvids; Brassicales; Brassicaceae; Camelineae; Arabidopsis	0.888584	0.993924	-0.183919	0.0916498	0.679682	1.3961	2.2369	1.27643	0.817689	0.613932	0.704702	0.648206	1.43616	0.824852	-3.5523	-4.09791	-4.77469
1	Nsylvestris_NODE_10802_length_2013_cov_184	NOA1_ARATH^NOA1_ARATH^Q:1913-270,H:12-559^65.162%ID^E:0^RecName: Full=NO-associated protein 1, chloroplastic/mitochondrial;^Eukaryota; Viridiplantae; Streptophyta; Embryophyta; Tracheophyta; Spermatophyta; Magnoliopsida; eudicotyledons; Gunneridae; Pentapetalae; rosids; malvids; Brassicales; Brassicaceae; Camelineae; Arabidopsis	0.725189	0.413913	0.566215	-0.278905	0.706621	1.83927	2.76264	2.02568	0.275174	-0.126229	0.242443	0.695	0.846853	0.405042	-2.56594	-3.61818	-4.91479
1	Nsylvestris_NODE_10806_length_2013_cov_135	K0930_XENLA^K0930_XENLA^Q:1588-737,H:30-273^27.055%ID^E:3.49e-16^RecName: Full=Uncharacterized protein KIAA0930 homolog;^Eukaryota; Metazoa; Chordata; Craniata; Vertebrata; Euteleostomi; Amphibia; Batrachia; Anura; Pipoidea; Pipidae; Xenopodinae; Xenopus; Xenopus	0.0474612	0.346377	-0.634926	-0.883431	0.0932941	0.486617	1.54162	0.962367	0.422335	0.657409	-0.418374	0.106457	0.353755	-0.156912	-1.14907	-0.681853	-1.09312
1	Nsylvestris_NODE_10809_length_2013_cov_28	MLO4_ARATH^MLO4_ARATH^Q:1953-238,H:1-573^63.311%ID^E:0^RecName: Full=MLO-like protein 4;^Eukaryota; Viridiplantae; Streptophyta; Embryophyta; Tracheophyta; Spermatophyta; Magnoliopsida; eudicotyledons; Gunneridae; Pentapetalae; rosids; malvids; Brassicales; Brassicaceae; Camelineae; Arabidopsis	-1.3454	-0.497405	1.03311	-1.08237	-0.497405	1.37706	2.75893	1.08756	-0.345402	0.140025	-0.66733	0.502595	-0.345402	-2.66733	1.6546	-1.3454	0.239561
1	Nsylvestris_NODE_10811_length_2012_cov_184	AMI4G_ARATH^AMI4G_ARATH^Q:1733-288,H:38-508^64.182%ID^E:0^RecName: Full=Probable amidase At4g34880 {ECO:0000305};^Eukaryota; Viridiplantae; Streptophyta; Embryophyta; Tracheophyta; Spermatophyta; Magnoliopsida; eudicotyledons; Gunneridae; Pentapetalae; rosids; malvids; Brassicales; Brassicaceae; Camelineae; Arabidopsis	0.816639	0.926263	0.529541	0.0374806	0.709723	1.7068	2.1145	1.55252	0.454843	0.549259	-0.405754	0.277056	0.212567	-0.183361	-3.06872	-2.99072	-3.23864
1	Nsylvestris_NODE_10813_length_2012_cov_143	GRF5_ARATH^GRF5_ARATH^Q:104-466,H:1-124^69.841%ID^E:3.41e-55^RecName: Full=Growth-regulating factor 5;^Eukaryota; Viridiplantae; Streptophyta; Embryophyta; Tracheophyta; Spermatophyta; Magnoliopsida; eudicotyledons; Gunneridae; Pentapetalae; rosids; malvids; Brassicales; Brassicaceae; Camelineae; Arabidopsis	-0.674351	-1.67435	-0.674351	-0.0893888	1.32565	2.91061	3.27985	-0.0893888	-0.674351	-0.0893888	-0.674351	0.910611	0.325649	-1.67435	-0.0893888	-1.67435	-0.674351
1	Nsylvestris_NODE_10814_length_2012_cov_127	.	0.737495	0.975615	-0.170857	0.00117163	0.629359	0.480835	1.53952	0.870604	0.876586	-0.027767	-0.687069	0.655389	1.05032	0.0286732	-2.51489	-1.87529	-2.5697
1	Nsylvestris_NODE_10815_length_2012_cov_75	.	0.443632	0.893414	1.95429	0.206939	0.373223	1.73636	3.06851	2.70205	0.341963	0.472533	1.16634	0.16321	0.992716	0.114225	-5.3241	-5.3241	-3.98121
1	Nsylvestris_NODE_10816_length_2004_cov_51	FBL48_ARATH^FBL48_ARATH^Q:1763-1059,H:13-246^26.971%ID^E:3.64e-14^RecName: Full=Putative F-box/LRR-repeat protein At3g28410;^Eukaryota; Viridiplantae; Streptophyta; Embryophyta; Tracheophyta; Spermatophyta; Magnoliopsida; eudicotyledons; Gunneridae; Pentapetalae; rosids; malvids; Brassicales; Brassicaceae; Camelineae; Arabidopsis	0.851964	-0.28554	-0.28554	-0.28554	-0.0225054	0.392532	1.73167	1.4051	-0.111773	1.79716	0.851964	0.397932	1.67052	-0.28554	-2.60747	-2.60747	-2.60747
1	Nsylvestris_NODE_1082_length_4837_cov_42	.	1.42286	1.06662	-1.35296	0.326804	0.609451	0.863916	2.10374	1.00977	0.478451	0.42161	1.09801	0.0356135	1.00226	-0.429894	-2.31772	-2.65505	-3.68348
1	Nsylvestris_NODE_10820_length_2011_cov_216	VPS4_ARATH^VPS4_ARATH^Q:1726-425,H:1-435^90.367%ID^E:0^RecName: Full=Protein SUPPRESSOR OF K(+) TRANSPORT GROWTH DEFECT 1 {ECO:0000303|PubMed:17468262};^Eukaryota; Viridiplantae; Streptophyta; Embryophyta; Tracheophyta; Spermatophyta; Magnoliopsida; eudicotyledons; Gunneridae; Pentapetalae; rosids; malvids; Brassicales; Brassicaceae; Camelineae; Arabidopsis	0.83134	0.840275	0.0326213	-0.0305023	0.864959	1.03332	1.96384	1.30283	0.623625	0.636599	-0.0355965	0.413101	0.935445	0.306787	-3.53597	-2.89876	-3.28392
1	Nsylvestris_NODE_10821_length_2011_cov_205	Y1680_ARATH^Y1680_ARATH^Q:1906-122,H:35-637^43.8%ID^E:5.02e-130^RecName: Full=Probable leucine-rich repeat receptor-like protein kinase At1g68400;^Eukaryota; Viridiplantae; Streptophyta; Embryophyta; Tracheophyta; Spermatophyta; Magnoliopsida; eudicotyledons; Gunneridae; Pentapetalae; rosids; malvids; Brassicales; Brassicaceae; Camelineae; Arabidopsis	1.42487	0.301383	0.966846	-1.06317	-0.243593	-0.832023	-0.287392	1.09569	1.90575	-1.20923	-0.0205826	0.784484	2.47015	0.966722	-2.79265	-1.97945	-1.48779
1	Nsylvestris_NODE_10823_length_2011_cov_153	.	1.67066	1.34873	-0.428875	0.464209	-0.914302	2.0117	2.34873	1.51866	-0.23623	-0.914302	-0.428875	-0.23623	1.57112	-0.651268	-3.23623	-1.65127	-2.23623
1	Nsylvestris_NODE_10824_length_2011_cov_25	.	-0.523623	1.54677	-1.26059	0.154449	0.154449	1.47638	1.90934	0.154449	0.961804	1.7983	0.324374	1.40238	-0.0381963	-0.523623	-1.84555	-2.84555	-2.84555
1	Nsylvestris_NODE_10825_length_2011_cov_23	.	0.256915	1.41124	1.79297	1.11007	0.624647	2.67993	3.39018	1.53173	0.110074	-0.304963	1.88783	-1.23785	-0.889926	0.728984	-4.69728	-4.69728	-3.69728
1	Nsylvestris_NODE_10826_length_2010_cov_221	PR19A_ARATH^PR19A_ARATH^Q:1874-297,H:1-521^74.573%ID^E:0^RecName: Full=Pre-mRNA-processing factor 19 homolog 1 {ECO:0000305};^Eukaryota; Viridiplantae; Streptophyta; Embryophyta; Tracheophyta; Spermatophyta; Magnoliopsida; eudicotyledons; Gunneridae; Pentapetalae; rosids; malvids; Brassicales; Brassicaceae; Camelineae; Arabidopsis	1.12135	1.44757	0.252485	-0.274395	0.899596	1.48562	2.35804	1.74523	1.31463	0.812293	0.00479674	0.271642	0.67899	0.217825	-3.75652	-4.90585	-3.67331
1	Nsylvestris_NODE_10827_length_2010_cov_219	PTC52_ARATH^PTC52_ARATH^Q:1564-182,H:78-557^61.491%ID^E:0^RecName: Full=Protochlorophyllide-dependent translocon component 52, chloroplastic;^Eukaryota; Viridiplantae; Streptophyta; Embryophyta; Tracheophyta; Spermatophyta; Magnoliopsida; eudicotyledons; Gunneridae; Pentapetalae; rosids; malvids; Brassicales; Brassicaceae; Camelineae; Arabidopsis	1.3542	0.455721	-0.289037	-1.17974	-0.312947	0.513349	2.86717	2.5909	0.3457	0.115986	0.811962	1.12194	1.7334	1.74428	-3.50976	-3.91971	-4.44341
1	Nsylvestris_NODE_10828_length_2010_cov_137	KIC_ARATH^KIC_ARATH^Q:1780-1962,H:36-96^55.738%ID^E:4.09e-13^RecName: Full=Calcium-binding protein KIC;^Eukaryota; Viridiplantae; Streptophyta; Embryophyta; Tracheophyta; Spermatophyta; Magnoliopsida; eudicotyledons; Gunneridae; Pentapetalae; rosids; malvids; Brassicales; Brassicaceae; Camelineae; Arabidopsis	0.628606	1.58017	0.975427	1.0608	1.55604	1.58683	2.89818	1.51615	0.386668	0.708323	0.0125514	0.779702	1.3025	0.706862	-4.5057	-5.59655	-5.59655
1	Nsylvestris_NODE_10829_length_2010_cov_111	TRPE_ARATH^TRPE_ARATH^Q:96-1841,H:7-594^68.537%ID^E:0^RecName: Full=Anthranilate synthase alpha subunit 1, chloroplastic;^Eukaryota; Viridiplantae; Streptophyta; Embryophyta; Tracheophyta; Spermatophyta; Magnoliopsida; eudicotyledons; Gunneridae; Pentapetalae; rosids; malvids; Brassicales; Brassicaceae; Camelineae; Arabidopsis	-0.860058	0.171665	0.322323	0.37277	0.0933779	2.06935	2.29142	0.476977	-0.281218	0.0708939	-0.152185	0.193905	-0.0404121	-0.233799	-0.871889	-1.98583	-1.63729
1	Nsylvestris_NODE_10830_length_2010_cov_107	.	-0.0807998	0.2764	0.167128	0.167128	-0.0807998	0.61964	1.73938	1.27675	0.563056	0.985074	1.12865	0.473789	2.31143	0.311518	-1.91087	-3.86668	-4.0808
1	Nsylvestris_NODE_10831_length_2010_cov_89	.	0.975788	0.636031	1.03348	0.0900631	0.196978	0.974586	1.81589	0.711551	0.712273	-0.150945	0.196978	0.296514	0.557944	-0.800962	-2.02541	-3.61038	-1.61038
1	Nsylvestris_NODE_10833_length_2009_cov_224	DTX18_ARATH^DTX18_ARATH^Q:1760-423,H:24-468^59.417%ID^E:5.56e-174^RecName: Full=Protein DETOXIFICATION 18 {ECO:0000303|PubMed:11739388};^Eukaryota; Viridiplantae; Streptophyta; Embryophyta; Tracheophyta; Spermatophyta; Magnoliopsida; eudicotyledons; Gunneridae; Pentapetalae; rosids; malvids; Brassicales; Brassicaceae; Camelineae; Arabidopsis	-0.462712	1.61423	-0.556727	0.093229	0.227038	2.66239	3.24099	1.55995	-0.785321	0.0898423	-1.07818	0.61166	0.0918578	0.599669	-2.11631	-3.8236	-1.96801
1	Nsylvestris_NODE_10834_length_2009_cov_202	YQJG_ECOLI^YQJG_ECOLI^Q:1739-795,H:15-324^49.533%ID^E:8.61e-100^RecName: Full=Glutathionyl-hydroquinone reductase YqjG;^Bacteria; Proteobacteria; Gammaproteobacteria; Enterobacterales; Enterobacteriaceae; Escherichia	0.280639	0.700812	1.20924	-0.425887	0.198576	0.43279	1.36033	1.48166	0.562119	0.42007	0.875468	0.481781	0.818105	0.215988	-3.04767	-2.39179	-3.17223
1	Nsylvestris_NODE_10835_length_2009_cov_189	C77A1_SOLME^C77A1_SOLME^Q:1699-320,H:39-499^82.863%ID^E:0^RecName: Full=Cytochrome P450 77A1;^Eukaryota; Viridiplantae; Streptophyta; Embryophyta; Tracheophyta; Spermatophyta; Magnoliopsida; eudicotyledons; Gunneridae; Pentapetalae; asterids; lamiids; Solanales; Solanaceae; Solanoideae; Solaneae; Solanum	-0.687637	0.100478	-0.611799	-0.848147	-0.0797115	1.71773	2.19262	1.38718	0.0970358	0.385473	-0.278231	0.241437	1.69785	0.6085	-2.05467	-2.07848	-1.78963
1	Nsylvestris_NODE_10836_length_2009_cov_179	HGNAT_MOUSE^HGNAT_MOUSE^Q:323-1351,H:252-586^30.081%ID^E:4.82e-29^RecName: Full=Heparan-alpha-glucosaminide N-acetyltransferase;^Eukaryota; Metazoa; Chordata; Craniata; Vertebrata; Euteleostomi; Mammalia; Eutheria; Euarchontoglires; Glires; Rodentia; Myomorpha; Muroidea; Muridae; Murinae; Mus; Mus	1.40237	1.44479	0.585969	0.63644	0.966437	1.36643	1.71949	1.52171	0.59853	0.0253553	0.476122	-0.234228	0.95104	0.0507155	-4.63252	-3.95813	-2.92052
1	Nsylvestris_NODE_10838_length_2009_cov_27	.	0.66529	0.250252	-0.219233	-1.33471	-0.33471	0.0803271	1.47264	-0.219233	0.938308	0.472645	0.665891	0.539759	0.402255	-0.112318	-1.59774	-0.919673	-0.749748
1	Nsylvestris_NODE_1084_length_4832_cov_146	SINA3_ARATH^SINA3_ARATH^Q:1249-335,H:8-325^83.072%ID^E:1.37e-179^RecName: Full=E3 ubiquitin-protein ligase SINAT3 {ECO:0000305};^Eukaryota; Viridiplantae; Streptophyta; Embryophyta; Tracheophyta; Spermatophyta; Magnoliopsida; eudicotyledons; Gunneridae; Pentapetalae; rosids; malvids; Brassicales; Brassicaceae; Camelineae; Arabidopsis	0.393	0.316009	0.082553	0.0349212	0.692712	0.928452	1.77738	1.35712	0.56431	0.465373	0.182084	0.109485	0.951007	0.266049	-3.06667	-2.1535	-2.90027
1	Nsylvestris_NODE_10840_length_2009_cov_19	Y5370_ARATH^Y5370_ARATH^Q:1814-393,H:26-482^51.579%ID^E:8e-157^RecName: Full=PAN domain-containing protein At5g03700;^Eukaryota; Viridiplantae; Streptophyta; Embryophyta; Tracheophyta; Spermatophyta; Magnoliopsida; eudicotyledons; Gunneridae; Pentapetalae; rosids; malvids; Brassicales; Brassicaceae; Camelineae; Arabidopsis	-0.275328	-1.26447	-0.679505	0.057461	0.0487787	2.3205	3.05746	1.43597	1.19365	-2.26447	1.05746	-1.26447	2.31145	1.0589	-2.26447	-2.26447	-2.26447
1	Nsylvestris_NODE_10844_length_2008_cov_213	ESS2_MOUSE^ESS2_MOUSE^Q:358-1656,H:33-421^30.493%ID^E:6.6e-38^RecName: Full=Splicing factor ESS-2 homolog;^Eukaryota; Metazoa; Chordata; Craniata; Vertebrata; Euteleostomi; Mammalia; Eutheria; Euarchontoglires; Glires; Rodentia; Myomorpha; Muroidea; Muridae; Murinae; Mus; Mus	0.613895	0.585951	0.161342	-0.503559	0.515933	0.559119	1.73074	0.425145	1.68411	1.20612	0.527061	1.22589	0.954051	0.442459	-3.41485	-3.51497	-3.19844
1	Nsylvestris_NODE_10845_length_2008_cov_152	FLXL3_ARATH^FLXL3_ARATH^Q:1815-1147,H:1-232^55.172%ID^E:1.83e-63^RecName: Full=Protein FLX-like 3;^Eukaryota; Viridiplantae; Streptophyta; Embryophyta; Tracheophyta; Spermatophyta; Magnoliopsida; eudicotyledons; Gunneridae; Pentapetalae; rosids; malvids; Brassicales; Brassicaceae; Camelineae; Arabidopsis	1.15795	1.10508	0.824753	0.75977	1.30871	1.56967	2.23888	1.5033	0.974867	0.721535	0.685125	0.648402	1.47921	1.00701	-5.78959	-5.79566	-4.399
1	Nsylvestris_NODE_10847_length_2008_cov_78	ANTR5_ARATH^ANTR5_ARATH^Q:219-1544,H:1-432^75.566%ID^E:0^RecName: Full=Probable anion transporter 5;^Eukaryota; Viridiplantae; Streptophyta; Embryophyta; Tracheophyta; Spermatophyta; Magnoliopsida; eudicotyledons; Gunneridae; Pentapetalae; rosids; malvids; Brassicales; Brassicaceae; Camelineae; Arabidopsis	0.117804	0.679251	0.163236	-0.0310592	0.648662	0.962323	2.06299	0.663528	0.418434	0.921112	-0.18968	0.381087	0.193925	-0.961771	-1.56176	-3.13721	-1.33087
1	Nsylvestris_NODE_10852_length_2010_cov_122	.	0.746307	1.53058	0.0358137	1.16134	0.161345	0.663845	1.22024	-0.253693	0.968699	0.483273	0.82431	0.968699	1.48327	0.276822	-3.42362	-3.42362	-3.42362
1	Nsylvestris_NODE_10855_length_2006_cov_195	AHL8_ARATH^AHL8_ARATH^Q:1388-735,H:101-329^58.515%ID^E:8.75e-57^RecName: Full=AT-hook motif nuclear-localized protein 8 {ECO:0000312|EMBL:FAA00279.1};^Eukaryota; Viridiplantae; Streptophyta; Embryophyta; Tracheophyta; Spermatophyta; Magnoliopsida; eudicotyledons; Gunneridae; Pentapetalae; rosids; malvids; Brassicales; Brassicaceae; Camelineae; Arabidopsis	1.06688	1.04833	-0.143518	-0.112085	-0.158154	0.610224	1.56746	-0.423908	0.123608	0.3921	-0.219219	-0.0883948	0.043484	-0.22982	-1.56431	-1.04911	-0.863566
1	Nsylvestris_NODE_10856_length_2006_cov_187	AMSH3_ARATH^AMSH3_ARATH^Q:146-1675,H:3-507^60.861%ID^E:0^RecName: Full=AMSH-like ubiquitin thioesterase 3;^Eukaryota; Viridiplantae; Streptophyta; Embryophyta; Tracheophyta; Spermatophyta; Magnoliopsida; eudicotyledons; Gunneridae; Pentapetalae; rosids; malvids; Brassicales; Brassicaceae; Camelineae; Arabidopsis	-0.30957	0.142911	-0.0443737	-0.728616	0.125971	-0.0593043	1.14599	0.598553	0.757957	0.423821	0.526386	0.351463	0.874244	0.149301	-1.10617	-1.55256	-1.296
1	Nsylvestris_NODE_10858_length_2006_cov_136	RIBA1_ARATH^RIBA1_ARATH^Q:1713-256,H:46-533^75.82%ID^E:0^RecName: Full=Bifunctional riboflavin biosynthesis protein RIBA 1, chloroplastic;^Eukaryota; Viridiplantae; Streptophyta; Embryophyta; Tracheophyta; Spermatophyta; Magnoliopsida; eudicotyledons; Gunneridae; Pentapetalae; rosids; malvids; Brassicales; Brassicaceae; Camelineae; Arabidopsis	1.23348	1.75386	1.35761	0.62418	1.25157	1.96741	2.6225	2.73382	1.29899	0.675024	0.277748	-0.832834	-0.516693	-1.02004	-4.47554	-4.47554	-4.47554
1	Nsylvestris_NODE_10859_length_2006_cov_89	.	0.134364	1.45629	0.766633	0.766633	0.335998	1.67042	2.76663	1.09784	0.286872	1.14729	0.332859	0.818734	1.007	-0.0248702	-4.18756	-4.18756	-4.18756
1	Nsylvestris_NODE_10860_length_2006_cov_87	DAR2_ARATH^DAR2_ARATH^Q:1786-269,H:21-528^66.154%ID^E:0^RecName: Full=Protein DA1-related 2 {ECO:0000303|PubMed:18483219};^Eukaryota; Viridiplantae; Streptophyta; Embryophyta; Tracheophyta; Spermatophyta; Magnoliopsida; eudicotyledons; Gunneridae; Pentapetalae; rosids; malvids; Brassicales; Brassicaceae; Camelineae; Arabidopsis	0.0788703	0.510527	1.07242	0.664988	0.0346155	1.70629	2.16863	1.42389	1.01041	0.576556	0.359299	1.23214	1.91585	0.688873	-4.78556	-4.2396	-4.41819
1	Nsylvestris_NODE_10861_length_2006_cov_83	PP173_ARATH^PP173_ARATH^Q:1453-479,H:118-442^60.615%ID^E:2.67e-147^RecName: Full=Pentatricopeptide repeat-containing protein At2g27800, mitochondrial;^Eukaryota; Viridiplantae; Streptophyta; Embryophyta; Tracheophyta; Spermatophyta; Magnoliopsida; eudicotyledons; Gunneridae; Pentapetalae; rosids; malvids; Brassicales; Brassicaceae; Camelineae; Arabidopsis	1.39877	1.01253	0.46474	-0.162433	0.0127819	0.908197	2.24077	2.35298	0.855135	0.351803	0.653155	0.0344844	0.974509	-0.310638	-4.84669	-3.21442	-2.72568
1	Nsylvestris_NODE_10862_length_2006_cov_47	DTX42_ARATH^DTX42_ARATH^Q:311-1879,H:1-515^67.176%ID^E:0^RecName: Full=Protein DETOXIFICATION 42 {ECO:0000303|PubMed:11739388};^Eukaryota; Viridiplantae; Streptophyta; Embryophyta; Tracheophyta; Spermatophyta; Magnoliopsida; eudicotyledons; Gunneridae; Pentapetalae; rosids; malvids; Brassicales; Brassicaceae; Camelineae; Arabidopsis	-3.77679	-0.969434	-1.45486	-0.0763489	-0.0763489	-0.0763489	2.54478	1.03057	1.02954	0.977564	0.310674	0.746773	2.61519	0.614842	-0.567335	-1.67581	-1.19664
1	Nsylvestris_NODE_10863_length_2006_cov_45	.	0.972855	0.303738	0.063379	1.41768	1.46698	1.59331	1.91839	1.85352	-0.654034	-0.404939	1.02837	-0.479185	0.385645	-0.368063	-3.03255	-3.03255	-3.03255
1	Nsylvestris_NODE_10864_length_2005_cov_219	DML_EUBBA^DML_EUBBA^Q:335-1198,H:2-287^43.793%ID^E:5.77e-70^RecName: Full=2,3-dimethylmalate lyase {ECO:0000312|EMBL:ABC88406.1};^Bacteria; Firmicutes; Clostridia; Clostridiales; Eubacteriaceae; Eubacterium	0.163483	0.22596	0.243474	-0.947493	-0.00299615	1.04289	1.71837	1.30202	1.10046	1.33446	1.15977	0.555638	1.07569	0.528749	-3.02757	-2.57542	-3.8975
1	Nsylvestris_NODE_10867_length_2005_cov_196	NADC_ARATH^NADC_ARATH^Q:34-1074,H:1-348^77.874%ID^E:0^RecName: Full=Nicotinate-nucleotide pyrophosphorylase [carboxylating], chloroplastic;^Eukaryota; Viridiplantae; Streptophyta; Embryophyta; Tracheophyta; Spermatophyta; Magnoliopsida; eudicotyledons; Gunneridae; Pentapetalae; rosids; malvids; Brassicales; Brassicaceae; Camelineae; Arabidopsis	-0.0969366	0.156736	-0.255852	-0.597058	-0.285641	0.349874	1.17012	0.961545	0.310316	0.211289	0.980565	0.332684	0.580442	0.00431987	-1.86244	0.448637	-2.4086
1	Nsylvestris_NODE_10868_length_2005_cov_85	.	0.443855	0.135733	-0.44923	-0.671622	-0.349694	1.8095	2.84145	1.97223	0.913341	1.55077	1.298	1.35813	0.650306	0.266977	-4.25658	-4.25658	-3.25658
1	Nsylvestris_NODE_10869_length_2005_cov_75	.	0.208358	0.588609	-0.425086	-0.32927	0.354985	0.432587	1.57629	0.429166	0.99921	0.427643	0.322573	0.945679	0.978555	-0.195928	-1.09945	-2.01211	-3.20181
1	Nsylvestris_NODE_10870_length_2004_cov_228	FLK_ARATH^FLK_ARATH^Q:310-1539,H:135-547^55.714%ID^E:1.31e-132^RecName: Full=Flowering locus K homology domain {ECO:0000303|PubMed:14593172};^Eukaryota; Viridiplantae; Streptophyta; Embryophyta; Tracheophyta; Spermatophyta; Magnoliopsida; eudicotyledons; Gunneridae; Pentapetalae; rosids; malvids; Brassicales; Brassicaceae; Camelineae; Arabidopsis	1.15573	1.48089	0.148329	0.334261	0.934954	1.50334	1.99488	1.45962	0.433597	0.709146	0.344456	0.306119	1.30513	0.207688	-4.1636	-3.70055	-4.45399
1	Nsylvestris_NODE_10873_length_1994_cov_12	PERX_NICSY^PERX_NICSY^Q:1562-1416,H:228-276^77.551%ID^E:2.36e-18^RecName: Full=Lignin-forming anionic peroxidase;^Eukaryota; Viridiplantae; Streptophyta; Embryophyta; Tracheophyta; Spermatophyta; Magnoliopsida; eudicotyledons; Gunneridae; Pentapetalae; asterids; lamiids; Solanales; Solanaceae; Nicotianoideae; Nicotianeae; Nicotiana`PERX_NICSY^PERX_NICSY^Q:1648-1571,H:192-218^59.259%ID^E:2.36e-18^…	0.26566	-0.264855	-0.0702077	0.0246514	0.0246514	0.372575	1.51942	1.15018	0.362233	1.15018	1.32011	0.734343	0.150182	0.56522	-2.43478	-1.43478	-3.43478
1	Nsylvestris_NODE_10874_length_2003_cov_221	PS12A_ARATH^PS12A_ARATH^Q:1829-507,H:1-441^82.313%ID^E:0^RecName: Full=26S proteasome non-ATPase regulatory subunit 12 homolog A;^Eukaryota; Viridiplantae; Streptophyta; Embryophyta; Tracheophyta; Spermatophyta; Magnoliopsida; eudicotyledons; Gunneridae; Pentapetalae; rosids; malvids; Brassicales; Brassicaceae; Camelineae; Arabidopsis	-0.0653173	0.361282	0.0744674	-0.628069	0.113953	0.029643	1.28697	1.00997	0.604955	0.269423	0.725536	0.479438	0.620521	-0.118421	-1.37471	-1.48149	-1.90815
1	Nsylvestris_NODE_10875_length_2003_cov_214	DCOR_DATST^DCOR_DATST^Q:1600-302,H:1-431^91.224%ID^E:0^RecName: Full=Ornithine decarboxylase;^Eukaryota; Viridiplantae; Streptophyta; Embryophyta; Tracheophyta; Spermatophyta; Magnoliopsida; eudicotyledons; Gunneridae; Pentapetalae; asterids; lamiids; Solanales; Solanaceae; Solanoideae; Datureae; Datura	1.03404	-0.292793	0.981946	0.0570295	1.77488	1.96724	1.70767	-0.0828532	0.455955	-0.24488	-0.0506519	-0.529379	2.62359	1.55117	-4.1901	-3.38056	-3.3823
1	Nsylvestris_NODE_10876_length_2003_cov_210	TRXB3_ARATH^TRXB3_ARATH^Q:1558-218,H:83-529^85.459%ID^E:0^RecName: Full=NADPH-dependent thioredoxin reductase 3;^Eukaryota; Viridiplantae; Streptophyta; Embryophyta; Tracheophyta; Spermatophyta; Magnoliopsida; eudicotyledons; Gunneridae; Pentapetalae; rosids; malvids; Brassicales; Brassicaceae; Camelineae; Arabidopsis	0.227572	-0.190605	0.078072	-0.688693	-0.145345	2.08808	3.15848	2.4363	0.431976	0.566946	0.545809	0.331474	0.824469	0.424463	-2.94455	-2.90445	-4.24
1	Nsylvestris_NODE_10878_length_2003_cov_204	EGY1_ARATH^EGY1_ARATH^Q:484-1788,H:114-548^84.598%ID^E:0^RecName: Full=Probable zinc metalloprotease EGY1, chloroplastic;^Eukaryota; Viridiplantae; Streptophyta; Embryophyta; Tracheophyta; Spermatophyta; Magnoliopsida; eudicotyledons; Gunneridae; Pentapetalae; rosids; malvids; Brassicales; Brassicaceae; Camelineae; Arabidopsis	0.501705	0.776471	0.0388234	0.0648882	-0.0203341	1.61793	2.38394	1.22714	0.546415	0.245404	0.65224	1.09635	0.836124	0.505939	-2.43689	-4.75207	-3.28408
1	Nsylvestris_NODE_1088_length_4831_cov_175	SWET5_ARATH^SWET5_ARATH^Q:1142-1837,H:1-232^69.828%ID^E:2.05e-103^RecName: Full=Bidirectional sugar transporter SWEET5 {ECO:0000303|PubMed:21107422};^Eukaryota; Viridiplantae; Streptophyta; Embryophyta; Tracheophyta; Spermatophyta; Magnoliopsida; eudicotyledons; Gunneridae; Pentapetalae; rosids; malvids; Brassicales; Brassicaceae; Camelineae; Arabidopsis	0.496779	0.947655	0.419492	0.0980422	1.00108	1.60241	2.1412	1.19411	0.604425	1.06657	0.741206	0.496082	2.19085	0.179097	-3.61752	-5.71972	-3.84176
1	Nsylvestris_NODE_10880_length_2003_cov_86	ZOG_PHALU^ZOG_PHALU^Q:1910-546,H:13-459^58.991%ID^E:0^RecName: Full=Zeatin O-glucosyltransferase;^Eukaryota; Viridiplantae; Streptophyta; Embryophyta; Tracheophyta; Spermatophyta; Magnoliopsida; eudicotyledons; Gunneridae; Pentapetalae; rosids; fabids; Fabales; Fabaceae; Papilionoideae; 50 kb inversion clade; NPAAA clade; indigoferoid/millettioid clade; Phaseoleae; Phaseolus	1.51062	1.50265	1.69555	-0.0298091	1.17346	1.45851	3.14204	0.899079	-0.249554	-1.02692	-0.0269208	0.236114	1.11058	-1.34885	-3.34885	-3.34885	-3.34885
1	Nsylvestris_NODE_10881_length_2003_cov_37	XRCC2_ARATH^XRCC2_ARATH^Q:85-1071,H:6-335^49.852%ID^E:1.43e-78^RecName: Full=DNA repair protein XRCC2 homolog;^Eukaryota; Viridiplantae; Streptophyta; Embryophyta; Tracheophyta; Spermatophyta; Magnoliopsida; eudicotyledons; Gunneridae; Pentapetalae; rosids; malvids; Brassicales; Brassicaceae; Camelineae; Arabidopsis	0.541256	1.22948	0.267243	0.069091	-0.439976	0.766344	1.7258	1.48963	0.267243	1.8578	1.06909	1.26423	-0.386037	0.231949	-3.31772	-3.31772	-3.31772
1	Nsylvestris_NODE_10884_length_2003_cov_135	DOF24_ARATH^DOF24_ARATH^Q:227-619,H:1-138^61.429%ID^E:1.02e-40^RecName: Full=Dof zinc finger protein DOF2.4 {ECO:0000303|PubMed:12475498};^Eukaryota; Viridiplantae; Streptophyta; Embryophyta; Tracheophyta; Spermatophyta; Magnoliopsida; eudicotyledons; Gunneridae; Pentapetalae; rosids; malvids; Brassicales; Brassicaceae; Camelineae; Arabidopsis	0.969671	1.00102	-0.914338	-0.177941	0.427872	0.886635	1.32864	-0.159462	0.010713	-0.137336	0.114461	-0.196853	1.18603	0.248015	-1.47485	-1.56181	-1.55047
1	Nsylvestris_NODE_10889_length_2002_cov_77	.	1.68922	1.6895	0.413373	1.20779	0.698775	2.60813	2.9172	1.9908	1.12762	0.983228	0.952532	-0.3387	-1.4167	-1.00166	-5.58663	-4.34784	-3.58663
1	Nsylvestris_NODE_10890_length_2002_cov_60	.	0.726502	0.803529	0.791404	-0.28279	0.0113701	0.398095	2.19621	1.73401	0.685	0.905575	1.36029	0.681022	0.78771	0.609996	-4.49769	-3.46912	-3.44111
1	Nsylvestris_NODE_10891_length_2002_cov_28	.	1.0938	1.19334	-0.128593	-0.713555	0.45637	1.45637	2.0938	-0.210207	-0.391627	1.93088	0.745876	-0.128593	0.45637	0.286445	-2.71356	-2.71356	-2.71356
1	Nsylvestris_NODE_10893_length_2001_cov_205	GRP1_DAUCA^GRP1_DAUCA^Q:1495-1620,H:1-42^71.429%ID^E:5.78e-12^RecName: Full=Glycine-rich RNA-binding protein;^Eukaryota; Viridiplantae; Streptophyta; Embryophyta; Tracheophyta; Spermatophyta; Magnoliopsida; eudicotyledons; Gunneridae; Pentapetalae; asterids; campanulids; Apiales; Apiaceae; Apioideae; Scandiceae; Daucinae; Daucus; Daucus sect. Daucus	0.639609	0.711533	0.244634	-0.271862	-0.0378122	0.270842	0.753571	0.251801	0.250482	0.382499	1.15535	0.244481	0.546117	-0.0884582	-1.263	-2.30549	-1.4843
1	Nsylvestris_NODE_10898_length_2001_cov_59	.	1.10032	1.16172	0.349348	-0.615886	1.12108	1.6783	2.68445	2.06851	1.17051	0.790884	1.12889	0.849777	0.959657	0.577059	-5.0082	-5.0082	-5.0082
1	Nsylvestris_NODE_109_length_8351_cov_54	TMVRN_NICGU^TMVRN_NICGU^Q:1257-3182,H:300-936^62.791%ID^E:0^RecName: Full=TMV resistance protein N;^Eukaryota; Viridiplantae; Streptophyta; Embryophyta; Tracheophyta; Spermatophyta; Magnoliopsida; eudicotyledons; Gunneridae; Pentapetalae; asterids; lamiids; Solanales; Solanaceae; Nicotianoideae; Nicotianeae; Nicotiana`TMVRN_NICGU^TMVRN_NICGU^Q:2937-4541,H:595-1134^60.18%ID^E:0^RecName: Full=TMV r…	1.50633	1.33422	0.0759368	0.397655	1.02772	1.43035	2.23002	1.5005	0.479645	0.460906	0.29898	-0.0698469	0.733318	-0.0339345	-3.78608	-3.51605	-4.06965
1	Nsylvestris_NODE_10901_length_2000_cov_223	SGS3_ORYSJ^SGS3_ORYSJ^Q:1105-1494,H:277-392^26.866%ID^E:7.5e-08^RecName: Full=Protein SUPPRESSOR OF GENE SILENCING 3 homolog;^Eukaryota; Viridiplantae; Streptophyta; Embryophyta; Tracheophyta; Spermatophyta; Magnoliopsida; Liliopsida; Poales; Poaceae; BOP clade; Oryzoideae; Oryzeae; Oryzinae; Oryza; Oryza sativa	0.455026	0.59233	-0.264658	-0.42394	-0.0317047	0.738586	1.56412	0.104995	1.27268	1.20138	0.692884	0.577671	1.5241	0.732741	-2.52544	-2.34225	-3.86851
1	Nsylvestris_NODE_10902_length_2000_cov_95	DNJ10_ARATH^DNJ10_ARATH^Q:748-326,H:172-315^54.861%ID^E:5.93e-39^RecName: Full=Chaperone protein dnaJ 10;^Eukaryota; Viridiplantae; Streptophyta; Embryophyta; Tracheophyta; Spermatophyta; Magnoliopsida; eudicotyledons; Gunneridae; Pentapetalae; rosids; malvids; Brassicales; Brassicaceae; Camelineae; Arabidopsis	0.311175	0.0798543	0.819409	-0.578088	-0.402256	0.618578	1.61225	1.1873	0.365107	0.0251048	-0.056305	0.0974675	0.707717	-0.300101	-1.63811	-0.67428	-2.17481
1	Nsylvestris_NODE_10906_length_1999_cov_180	ACOC_CUCMA^ACOC_CUCMA^Q:598-338,H:666-753^48.387%ID^E:1.03e-08^RecName: Full=Aconitate hydratase, cytoplasmic;^Eukaryota; Viridiplantae; Streptophyta; Embryophyta; Tracheophyta; Spermatophyta; Magnoliopsida; eudicotyledons; Gunneridae; Pentapetalae; rosids; fabids; Cucurbitales; Cucurbitaceae; Cucurbiteae; Cucurbita	0.713328	0.905973	0.0986178	-0.200942	0.227901	1.52488	2.72067	2.05281	1.00551	1.30807	1.69853	1.05281	1.00551	0.590471	-4.90138	-4.90138	-4.90138
1	Nsylvestris_NODE_10907_length_1999_cov_160	FPS_PANGI^FPS_PANGI^Q:199-1116,H:1-306^85.294%ID^E:0^RecName: Full=Farnesyl pyrophosphate synthase {ECO:0000303|PubMed:29509695, ECO:0000303|Ref.1};^Eukaryota; Viridiplantae; Streptophyta; Embryophyta; Tracheophyta; Spermatophyta; Magnoliopsida; eudicotyledons; Gunneridae; Pentapetalae; asterids; campanulids; Apiales; Araliaceae; Panax`FPS_PANGI^FPS_PANGI^Q:1638-1763,H:301-342^73.81%ID^E:1.05e-09…	0.673652	1.05871	0.639726	0.121837	0.720573	0.637807	1.90265	1.89356	0.946562	0.589061	0.757261	0.653974	0.833935	0.615439	-4.07983	-3.29933	-4.66558
1	Nsylvestris_NODE_1091_length_4831_cov_112	MMSA_ARATH^MMSA_ARATH^Q:819-1574,H:100-341^68.254%ID^E:7.26e-111^RecName: Full=Methylmalonate-semialdehyde dehydrogenase [acylating], mitochondrial;^Eukaryota; Viridiplantae; Streptophyta; Embryophyta; Tracheophyta; Spermatophyta; Magnoliopsida; eudicotyledons; Gunneridae; Pentapetalae; rosids; malvids; Brassicales; Brassicaceae; Camelineae; Arabidopsis`MMSA_ARATH^MMSA_ARATH^Q:3713-4012,H:464-562…	1.01902	0.967396	-0.496393	-0.292561	-0.00200519	1.07073	2.20664	0.918239	1.3302	1.8794	1.54863	1.57372	1.53044	0.897406	-4.91489	-4.88741	-4.34855
1	Nsylvestris_NODE_10910_length_1998_cov_220	ASE2_ARATH^ASE2_ARATH^Q:1756-314,H:78-560^86.335%ID^E:0^RecName: Full=Amidophosphoribosyltransferase 2, chloroplastic;^Eukaryota; Viridiplantae; Streptophyta; Embryophyta; Tracheophyta; Spermatophyta; Magnoliopsida; eudicotyledons; Gunneridae; Pentapetalae; rosids; malvids; Brassicales; Brassicaceae; Camelineae; Arabidopsis	1.48617	1.40413	-0.43938	-0.230982	0.79452	1.28782	1.96967	0.911542	0.685256	0.487302	0.256244	0.649225	1.21845	0.246024	-3.21688	-4.08579	-3.42333
1	Nsylvestris_NODE_10914_length_1998_cov_116	.	0.900205	1.34479	0.704866	-0.00322453	-0.0287121	1.20101	1.66568	0.464043	1.12913	0.511349	1.06273	-0.00322453	0.526625	-0.21711	-4.44285	-4.44285	-0.372458
1	Nsylvestris_NODE_10916_length_1998_cov_109	PPH_ARATH^PPH_ARATH^Q:1097-348,H:129-411^25.517%ID^E:1.08e-17^RecName: Full=Pheophytinase, chloroplastic;^Eukaryota; Viridiplantae; Streptophyta; Embryophyta; Tracheophyta; Spermatophyta; Magnoliopsida; eudicotyledons; Gunneridae; Pentapetalae; rosids; malvids; Brassicales; Brassicaceae; Camelineae; Arabidopsis	1.14957	1.27805	0.391968	-0.219216	0.73809	1.29994	3.19206	2.44422	-0.099321	0.717129	1.04935	0.0230714	-0.432998	0.308041	-3.13924	-5.14284	-3.55788
1	Nsylvestris_NODE_10917_length_1998_cov_87	P2C40_ARATH^P2C40_ARATH^Q:682-1746,H:145-491^63.764%ID^E:4.43e-144^RecName: Full=Probable protein phosphatase 2C 40;^Eukaryota; Viridiplantae; Streptophyta; Embryophyta; Tracheophyta; Spermatophyta; Magnoliopsida; eudicotyledons; Gunneridae; Pentapetalae; rosids; malvids; Brassicales; Brassicaceae; Camelineae; Arabidopsis`P2C40_ARATH^P2C40_ARATH^Q:277-516,H:2-82^56.098%ID^E:1.34e-07^RecName: Full…	0.738603	0.77514	0.297378	-0.181019	0.132338	1.91821	2.0402	1.21756	1.00027	1.4256	0.844213	0.90114	1.46302	-0.0649129	-4.16925	-4.16925	-4.16925
1	Nsylvestris_NODE_10919_length_1998_cov_77	VAP12_ARATH^VAP12_ARATH^Q:650-462,H:176-239^62.5%ID^E:3.8e-11^RecName: Full=Vesicle-associated protein 1-2;^Eukaryota; Viridiplantae; Streptophyta; Embryophyta; Tracheophyta; Spermatophyta; Magnoliopsida; eudicotyledons; Gunneridae; Pentapetalae; rosids; malvids; Brassicales; Brassicaceae; Camelineae; Arabidopsis	0.547081	0.840433	0.678202	0.153203	0.561859	0.60864	2.23051	1.58703	0.783357	0.514911	0.745758	0.556217	0.525857	0.282972	-3.53607	-3.98239	-3.09757
1	Nsylvestris_NODE_1092_length_4831_cov_81	YRDC_HUMAN^YRDC_HUMAN^Q:890-408,H:106-268^46.988%ID^E:3.63e-39^RecName: Full=YrdC domain-containing protein, mitochondrial;^Eukaryota; Metazoa; Chordata; Craniata; Vertebrata; Euteleostomi; Mammalia; Eutheria; Euarchontoglires; Primates; Haplorrhini; Catarrhini; Hominidae; Homo	1.36214	1.24457	0.209868	-0.500808	-0.0873196	0.638647	1.97472	1.46209	0.909334	0.960839	0.972736	1.26076	1.34625	1.03741	-4.51912	-3.89904	-4.37309
1	Nsylvestris_NODE_10920_length_1998_cov_16	.	1.7231	1.95757	0.95757	0.220604	0.220604	1.7231	2.58984	3.2795	-0.779396	0.95757	1.33608	-2.36436	-2.36436	-2.36436	-2.36436	-2.36436	-2.36436
1	Nsylvestris_NODE_10921_length_1998_cov_10	ZAT9_ARATH^ZAT9_ARATH^Q:1418-1819,H:170-282^40%ID^E:1.21e-13^RecName: Full=Zinc finger protein ZAT9;^Eukaryota; Viridiplantae; Streptophyta; Embryophyta; Tracheophyta; Spermatophyta; Magnoliopsida; eudicotyledons; Gunneridae; Pentapetalae; rosids; malvids; Brassicales; Brassicaceae; Camelineae; Arabidopsis	1.13625	0.605734	0.020772	0.020772	0.757738	1.52327	1.52327	2.60573	0.020772	0.243164	-2.56419	0.020772	-0.564191	-0.242262	-0.979228	-1.56419	-2.56419
1	Nsylvestris_NODE_10922_length_1997_cov_218	ZIFL1_ARATH^ZIFL1_ARATH^Q:1862-438,H:3-478^65.272%ID^E:0^RecName: Full=Protein ZINC INDUCED FACILITATOR-LIKE 1;^Eukaryota; Viridiplantae; Streptophyta; Embryophyta; Tracheophyta; Spermatophyta; Magnoliopsida; eudicotyledons; Gunneridae; Pentapetalae; rosids; malvids; Brassicales; Brassicaceae; Camelineae; Arabidopsis	0.822588	1.44861	0.249239	0.372158	1.32684	2.16624	2.72041	1.91983	0.574823	0.801874	0.461187	-0.134858	0.783993	0.88427	-4.22232	-5.15366	-5.02121
1	Nsylvestris_NODE_10925_length_1997_cov_174	.	-0.0401975	0.723048	0.855382	-0.323188	0.410365	1.45646	2.18373	2.1925	0.639542	0.143551	-0.119022	-0.0387583	0.398824	0.449487	-2.99852	-3.55977	-2.37343
1	Nsylvestris_NODE_10926_length_1997_cov_102	PMEU1_SOLLC^PMEU1_SOLLC^Q:1756-137,H:47-583^80.185%ID^E:0^RecName: Full=Pectinesterase/pectinesterase inhibitor U1;^Eukaryota; Viridiplantae; Streptophyta; Embryophyta; Tracheophyta; Spermatophyta; Magnoliopsida; eudicotyledons; Gunneridae; Pentapetalae; asterids; lamiids; Solanales; Solanaceae; Solanoideae; Solaneae; Solanum; Lycopersicon	0.372742	1.05081	0.858169	-0.364223	0.510246	2.6054	3.3546	1.85817	-0.364223	-0.913562	-2.94919	-2.94919	0.372742	-1.36422	-0.357028	-1.36422	-0.357028
1	Nsylvestris_NODE_10928_length_1996_cov_227	ODO2A_ARATH^ODO2A_ARATH^Q:212-1630,H:3-464^67.23%ID^E:0^RecName: Full=Dihydrolipoyllysine-residue succinyltransferase component of 2-oxoglutarate dehydrogenase complex 1, mitochondrial;^Eukaryota; Viridiplantae; Streptophyta; Embryophyta; Tracheophyta; Spermatophyta; Magnoliopsida; eudicotyledons; Gunneridae; Pentapetalae; rosids; malvids; Brassicales; Brassicaceae; Camelineae; Arabidopsis	0.527614	0.937951	0.687986	-0.0147091	0.687294	1.26256	2.29554	2.1117	0.989476	0.987885	0.607652	0.799839	1.02621	0.476372	-4.32934	-4.24473	-4.8093
1	Nsylvestris_NODE_10930_length_1996_cov_192	PP1_ORYSJ^PP1_ORYSJ^Q:838-2,H:15-294^85.714%ID^E:3.22e-176^RecName: Full=Serine/threonine-protein phosphatase PP1;^Eukaryota; Viridiplantae; Streptophyta; Embryophyta; Tracheophyta; Spermatophyta; Magnoliopsida; Liliopsida; Poales; Poaceae; BOP clade; Oryzoideae; Oryzeae; Oryzinae; Oryza; Oryza sativa	0.355935	0.663271	0.1118	-0.400879	0.13252	0.714428	1.62132	1.39078	0.227056	0.178807	0.234768	-0.0315205	0.519083	-0.175997	-1.655	-2.12095	-1.76542
1	Nsylvestris_NODE_10931_length_1996_cov_184	CKX7_ARATH^CKX7_ARATH^Q:1682-207,H:25-523^65.531%ID^E:0^RecName: Full=Cytokinin dehydrogenase 7;^Eukaryota; Viridiplantae; Streptophyta; Embryophyta; Tracheophyta; Spermatophyta; Magnoliopsida; eudicotyledons; Gunneridae; Pentapetalae; rosids; malvids; Brassicales; Brassicaceae; Camelineae; Arabidopsis	2.5529	1.06088	0.0422837	-0.212973	1.13661	0.190382	1.84406	2.69081	0.436605	-0.0378867	1.73972	-0.706427	1.75205	0.690563	-5.16717	-2.84524	-5.16717
1	Nsylvestris_NODE_10934_length_1996_cov_88	LORF2_HUMAN^LORF2_HUMAN^Q:1245-709,H:457-638^23.529%ID^E:2e-08^RecName: Full=LINE-1 retrotransposable element ORF2 protein;^Eukaryota; Metazoa; Chordata; Craniata; Vertebrata; Euteleostomi; Mammalia; Eutheria; Euarchontoglires; Primates; Haplorrhini; Catarrhini; Hominidae; Homo`LORF2_HUMAN^LORF2_HUMAN^Q:703-602,H:649-682^41.176%ID^E:2e-08^RecName: Full=LINE-1 retrotransposable element ORF2 protei…	1.76752	1.14838	-0.106567	-0.741258	0.193313	0.261269	1.06898	-1.01941	1.06258	0.747057	1.65683	1.07884	1.31352	1.16756	-3.45623	-3.0821	-3.0603
1	Nsylvestris_NODE_10935_length_1996_cov_50	NDC80_ARATH^NDC80_ARATH^Q:1431-1967,H:369-543^46.927%ID^E:2.11e-29^RecName: Full=Kinetochore protein NDC80 homolog {ECO:0000303|PubMed:29356153};^Eukaryota; Viridiplantae; Streptophyta; Embryophyta; Tracheophyta; Spermatophyta; Magnoliopsida; eudicotyledons; Gunneridae; Pentapetalae; rosids; malvids; Brassicales; Brassicaceae; Camelineae; Arabidopsis	-0.363571	0.953556	1.04667	-1.94614	-1.36837	1.85299	2.44036	1.90365	1.19804	0.0466651	0.935165	0.510026	0.218192	-0.152176	-1.36837	-2.95333	-2.95333
1	Nsylvestris_NODE_10936_length_1995_cov_29	.	-0.434333	0.576772	-0.487772	-0.72384	-0.188893	1.45779	2.27756	1.22102	-0.193325	0.106235	0.193698	1.91153	0.629797	-0.571837	-1.3088	-2.89376	-1.57184
1	Nsylvestris_NODE_10937_length_1996_cov_21	FRIGI_ARATH^FRIGI_ARATH^Q:216-1442,H:59-453^34.554%ID^E:3.02e-63^RecName: Full=Protein FRIGIDA {ECO:0000303|PubMed:11030654};^Eukaryota; Viridiplantae; Streptophyta; Embryophyta; Tracheophyta; Spermatophyta; Magnoliopsida; eudicotyledons; Gunneridae; Pentapetalae; rosids; malvids; Brassicales; Brassicaceae; Camelineae; Arabidopsis	-1.02514	0.3899	1.29679	-1.6101	0.974862	0.974862	1.84933	-0.288172	-1.6101	0.559825	0.559825	1.3899	0.849331	0.197255	-0.288172	-2.6101	-1.6101
1	Nsylvestris_NODE_10945_length_1995_cov_9	.	-0.235015	1.25041	-0.556943	0.417586	0.413911	1.31982	2.30104	0.764985	-0.556943	-2.55694	-0.339712	-0.97198	-0.556943	-1.55694	0.655627	-0.235015	0.443057
1	Nsylvestris_NODE_10947_length_1994_cov_196	ASIL2_ARATH^ASIL2_ARATH^Q:600-881,H:84-178^45.361%ID^E:1.2e-11^RecName: Full=Trihelix transcription factor ASIL2 {ECO:0000305};^Eukaryota; Viridiplantae; Streptophyta; Embryophyta; Tracheophyta; Spermatophyta; Magnoliopsida; eudicotyledons; Gunneridae; Pentapetalae; rosids; malvids; Brassicales; Brassicaceae; Camelineae; Arabidopsis	0.343412	0.314988	0.138279	-0.430943	-0.0826949	1.59662	2.12268	0.23686	0.436224	-0.0437999	0.088288	-0.00916857	0.683282	-0.0667485	-1.94085	-1.54182	-1.84462
1	Nsylvestris_NODE_1095_length_4825_cov_164	ROG1_YEAST^ROG1_YEAST^Q:385-783,H:189-307^32.847%ID^E:1.12e-08^RecName: Full=Putative lipase ROG1;^Eukaryota; Fungi; Dikarya; Ascomycota; Saccharomycotina; Saccharomycetes; Saccharomycetales; Saccharomycetaceae; Saccharomyces	0.21891	0.374735	0.564234	0.0765249	0.536012	1.06194	1.79612	0.64294	0.84006	0.592069	0.686343	0.651703	1.15686	0.19564	-2.97196	-2.99814	-3.42398
1	Nsylvestris_NODE_10950_length_1994_cov_102	RS29_WHEAT^RS29_WHEAT^Q:967-1134,H:1-56^80.357%ID^E:7.53e-26^RecName: Full=40S ribosomal protein S29;^Eukaryota; Viridiplantae; Streptophyta; Embryophyta; Tracheophyta; Spermatophyta; Magnoliopsida; Liliopsida; Poales; Poaceae; BOP clade; Pooideae; Triticodae; Triticeae; Triticinae; Triticum	0.633872	1.52893	1.33425	1.34333	1.45681	1.51687	1.87917	1.78247	0.364259	1.31161	0.220581	-0.124363	-0.155485	-0.311554	-3.38063	-5.12405	-4.27606
1	Nsylvestris_NODE_10951_length_1994_cov_72	MED23_ARATH^MED23_ARATH^Q:1184-1462,H:1513-1605^72.043%ID^E:1.1e-34^RecName: Full=Mediator of RNA polymerase II transcription subunit 23;^Eukaryota; Viridiplantae; Streptophyta; Embryophyta; Tracheophyta; Spermatophyta; Magnoliopsida; eudicotyledons; Gunneridae; Pentapetalae; rosids; malvids; Brassicales; Brassicaceae; Camelineae; Arabidopsis	1.17868	1.38251	-0.183087	0.127253	0.301515	1.00671	2.37253	0.873497	0.458459	1.63249	1.03104	0.696619	1.30028	0.30234	-4.82694	-3.82694	-3.82694
1	Nsylvestris_NODE_10957_length_1993_cov_190	Y3567_ARATH^Y3567_ARATH^Q:453-1763,H:1-439^58.05%ID^E:5.71e-177^RecName: Full=BTB/POZ domain-containing protein At3g05675;^Eukaryota; Viridiplantae; Streptophyta; Embryophyta; Tracheophyta; Spermatophyta; Magnoliopsida; eudicotyledons; Gunneridae; Pentapetalae; rosids; malvids; Brassicales; Brassicaceae; Camelineae; Arabidopsis	0.470874	0.838558	0.220791	0.0143675	-0.0937923	1.61562	2.15062	1.85979	1.0079	1.34369	0.601717	0.916432	1.59372	0.617975	-4.79115	-5.81423	-2.55289
1	Nsylvestris_NODE_10958_length_1993_cov_129	GDL88_ARATH^GDL88_ARATH^Q:1803-1423,H:1-127^76.378%ID^E:4.25e-66^RecName: Full=GDSL esterase/lipase At5g62930;^Eukaryota; Viridiplantae; Streptophyta; Embryophyta; Tracheophyta; Spermatophyta; Magnoliopsida; eudicotyledons; Gunneridae; Pentapetalae; rosids; malvids; Brassicales; Brassicaceae; Camelineae; Arabidopsis`GDL88_ARATH^GDL88_ARATH^Q:573-244,H:132-241^65.455%ID^E:2.35e-43^RecName: Full=GD…	0.0676943	0.608074	0.493999	-0.183344	0.300649	1.34046	2.08783	1.74876	0.133672	0.163035	0.00707042	0.00707042	0.651407	-0.0638487	-2.48366	-2.24304	-2.63585
1	Nsylvestris_NODE_10959_length_1993_cov_86	PCH2_ARATH^PCH2_ARATH^Q:1719-457,H:45-467^76.832%ID^E:0^RecName: Full=Pachytene checkpoint protein 2 homolog {ECO:0000305};^Eukaryota; Viridiplantae; Streptophyta; Embryophyta; Tracheophyta; Spermatophyta; Magnoliopsida; eudicotyledons; Gunneridae; Pentapetalae; rosids; malvids; Brassicales; Brassicaceae; Camelineae; Arabidopsis	0.215066	1.10189	-0.752103	1.33621	-0.37082	1.15479	1.94834	0.707329	0.895211	-0.430175	0.251499	-0.0762871	0.506416	0.733324	-2.7521	-2.7521	-1.71648
1	Nsylvestris_NODE_10960_length_1993_cov_76	IAA30_ORYSJ^IAA30_ORYSJ^Q:1018-1245,H:201-273^75%ID^E:6.76e-30^RecName: Full=Auxin-responsive protein IAA30;^Eukaryota; Viridiplantae; Streptophyta; Embryophyta; Tracheophyta; Spermatophyta; Magnoliopsida; Liliopsida; Poales; Poaceae; BOP clade; Oryzoideae; Oryzeae; Oryzinae; Oryza; Oryza sativa	1.02766	0.18812	0.110118	0.262121	1.29774	1.36646	2.14965	1.14965	1.11012	0.940193	0.894389	-0.252452	1.18812	-0.252452	-4.05981	-4.05981	-3.05981
1	Nsylvestris_NODE_10962_length_1993_cov_8	.	0.460508	-0.539492	-2.12445	-1.12445	0.197474	0.682901	2.5194	1.57599	0.460508	0.197474	0.662142	1.33235	1.87555	0.197474	-2.12445	-2.12445	-2.12445
1	Nsylvestris_NODE_10965_length_1992_cov_112	NADB_ARATH^NADB_ARATH^Q:1348-617,H:43-285^75.51%ID^E:4.48e-119^RecName: Full=L-aspartate oxidase, chloroplastic;^Eukaryota; Viridiplantae; Streptophyta; Embryophyta; Tracheophyta; Spermatophyta; Magnoliopsida; eudicotyledons; Gunneridae; Pentapetalae; rosids; malvids; Brassicales; Brassicaceae; Camelineae; Arabidopsis	0.100882	0.786475	-0.0397549	0.0851445	0.187919	1.00132	2.51723	1.11248	0.700154	0.665726	0.214979	0.68419	1.37681	0.811652	-5.13905	-2.10343	-2.96273
1	Nsylvestris_NODE_10966_length_1992_cov_32	LYK3_MEDTR^LYK3_MEDTR^Q:61-1827,H:6-601^50.082%ID^E:0^RecName: Full=LysM domain receptor-like kinase 3 {ECO:0000303|PubMed:12947035};^Eukaryota; Viridiplantae; Streptophyta; Embryophyta; Tracheophyta; Spermatophyta; Magnoliopsida; eudicotyledons; Gunneridae; Pentapetalae; rosids; fabids; Fabales; Fabaceae; Papilionoideae; 50 kb inversion clade; NPAAA clade; Hologalegina; IRL clade; Trifolieae; Me…	-0.385154	0.507931	-0.0225838	0.614846	0.714382	1.12942	2.78477	1.05542	1.61485	0.266923	0.714382	0.266923	0.507931	-1.19251	-2.19251	-3.19251	-3.19251
1	Nsylvestris_NODE_10967_length_1992_cov_7	PP436_ARATH^PP436_ARATH^Q:18-1451,H:54-530^55.439%ID^E:1.74e-180^RecName: Full=Pentatricopeptide repeat-containing protein At5g59600;^Eukaryota; Viridiplantae; Streptophyta; Embryophyta; Tracheophyta; Spermatophyta; Magnoliopsida; eudicotyledons; Gunneridae; Pentapetalae; rosids; malvids; Brassicales; Brassicaceae; Camelineae; Arabidopsis	0.794125	1.84501	-0.754312	0.706431	0.569058	1.05304	1.83065	-0.432384	1.24208	0.412403	0.343299	1.84024	-0.432384	-0.754312	-2.75431	-2.75431	-2.75431
1	Nsylvestris_NODE_10968_length_1991_cov_223	SYT1_ARATH^SYT1_ARATH^Q:140-1756,H:1-541^75.416%ID^E:0^RecName: Full=Synaptotagmin-1;^Eukaryota; Viridiplantae; Streptophyta; Embryophyta; Tracheophyta; Spermatophyta; Magnoliopsida; eudicotyledons; Gunneridae; Pentapetalae; rosids; malvids; Brassicales; Brassicaceae; Camelineae; Arabidopsis	0.729893	0.948532	0.418841	-0.10924	0.423092	1.4961	1.86722	1.17976	0.841328	0.395917	0.753417	0.339597	1.02323	0.314194	-3.5129	-3.67821	-3.43077
1	Nsylvestris_NODE_10969_length_1991_cov_218	PUX2_ARATH^PUX2_ARATH^Q:1682-330,H:1-457^61.388%ID^E:1.7e-160^RecName: Full=Plant UBX domain-containing protein 2 {ECO:0000303|Ref.8};^Eukaryota; Viridiplantae; Streptophyta; Embryophyta; Tracheophyta; Spermatophyta; Magnoliopsida; eudicotyledons; Gunneridae; Pentapetalae; rosids; malvids; Brassicales; Brassicaceae; Camelineae; Arabidopsis	-0.120259	-0.283254	0.112858	-0.990917	-0.35022	0.455693	1.63627	0.816405	1.48998	1.2823	0.373391	1.29578	0.960787	0.251526	-2.47688	-1.77724	-2.67621
1	Nsylvestris_NODE_10970_length_1991_cov_215	RS8_MAIZE^RS8_MAIZE^Q:1891-1262,H:1-213^85.047%ID^E:1.6e-94^RecName: Full=40S ribosomal protein S8;^Eukaryota; Viridiplantae; Streptophyta; Embryophyta; Tracheophyta; Spermatophyta; Magnoliopsida; Liliopsida; Poales; Poaceae; PACMAD clade; Panicoideae; Andropogonodae; Andropogoneae; Tripsacinae; Zea	0.114076	0.787011	-0.105017	-0.148127	0.659436	1.80809	1.87719	1.37839	0.464978	0.978386	0.0643975	0.62589	0.442715	0.205764	-3.32201	-2.94327	-2.8879
1	Nsylvestris_NODE_10974_length_1991_cov_174	CDKC2_ARATH^CDKC2_ARATH^Q:1790-270,H:1-512^75.385%ID^E:0^RecName: Full=Cyclin-dependent kinase C-2;^Eukaryota; Viridiplantae; Streptophyta; Embryophyta; Tracheophyta; Spermatophyta; Magnoliopsida; eudicotyledons; Gunneridae; Pentapetalae; rosids; malvids; Brassicales; Brassicaceae; Camelineae; Arabidopsis	0.473538	0.622208	0.305433	0.249411	0.572554	0.93453	1.70785	1.0552	0.652396	1.10827	0.549047	1.00551	0.701865	-0.402883	-3.50837	-2.74937	-3.27719
1	Nsylvestris_NODE_10975_length_1991_cov_96	DCUP_TOBAC^DCUP_TOBAC^Q:880-368,H:221-391^94.737%ID^E:9.27e-99^RecName: Full=Uroporphyrinogen decarboxylase, chloroplastic;^Eukaryota; Viridiplantae; Streptophyta; Embryophyta; Tracheophyta; Spermatophyta; Magnoliopsida; eudicotyledons; Gunneridae; Pentapetalae; asterids; lamiids; Solanales; Solanaceae; Nicotianoideae; Nicotianeae; Nicotiana	0.257976	0.363609	0.311943	-0.0969769	-0.0536784	0.89396	2.44091	1.21927	0.0840836	0.403511	0.46435	0.419646	0.540732	-0.211803	-2.0824	-2.65389	-2.30125
1	Nsylvestris_NODE_10979_length_1990_cov_195	SPL12_ARATH^SPL12_ARATH^Q:713-1309,H:9-174^41.667%ID^E:1.69e-33^RecName: Full=Squamosa promoter-binding-like protein 12;^Eukaryota; Viridiplantae; Streptophyta; Embryophyta; Tracheophyta; Spermatophyta; Magnoliopsida; eudicotyledons; Gunneridae; Pentapetalae; rosids; malvids; Brassicales; Brassicaceae; Camelineae; Arabidopsis	0.102402	0.281702	-0.203129	-0.189098	-0.0227694	1.18602	1.51988	0.70491	0.561192	-0.0313153	0.0888893	0.0978675	0.588957	-0.032046	-1.51934	-1.19743	-1.9367
1	Nsylvestris_NODE_1098_length_4823_cov_132	RBP47_NICPL^RBP47_NICPL^Q:1241-246,H:107-426^80.723%ID^E:4.01e-153^RecName: Full=Polyadenylate-binding protein RBP47;^Eukaryota; Viridiplantae; Streptophyta; Embryophyta; Tracheophyta; Spermatophyta; Magnoliopsida; eudicotyledons; Gunneridae; Pentapetalae; asterids; lamiids; Solanales; Solanaceae; Nicotianoideae; Nicotianeae; Nicotiana`RBP47_NICPL^RBP47_NICPL^Q:992-438,H:85-251^27.411%ID^E:9.36e-…	0.659875	1.09969	0.30069	0.893057	1.61058	1.41426	2.45886	0.983788	1.05842	1.18031	-0.175873	0.538669	1.47473	0.443684	-4.69098	-4.44612	-4.80365
1	Nsylvestris_NODE_10980_length_1990_cov_194	PBRP1_ARATH^PBRP1_ARATH^Q:1859-711,H:1-385^79.016%ID^E:0^RecName: Full=Plant-specific TFIIB-related protein 1 {ECO:0000305};^Eukaryota; Viridiplantae; Streptophyta; Embryophyta; Tracheophyta; Spermatophyta; Magnoliopsida; eudicotyledons; Gunneridae; Pentapetalae; rosids; malvids; Brassicales; Brassicaceae; Camelineae; Arabidopsis	0.875377	0.724046	-0.206286	-0.206678	0.648822	0.441198	1.26437	0.97853	0.870739	0.581921	0.762208	0.252349	1.00941	-0.791184	-1.87075	-2.94513	-2.38894
1	Nsylvestris_NODE_10981_length_1990_cov_83	.	0.494295	1.23287	0.17179	-0.0626753	-0.745508	1.60315	2.0389	1.24149	0.435425	0.17179	0.520022	0.434824	0.0197868	-0.690707	-3.15014	-2.15014	-1.56518
1	Nsylvestris_NODE_10982_length_1990_cov_53	PLY13_ARATH^PLY13_ARATH^Q:1500-319,H:23-418^71.605%ID^E:0^RecName: Full=Probable pectate lyase 13;^Eukaryota; Viridiplantae; Streptophyta; Embryophyta; Tracheophyta; Spermatophyta; Magnoliopsida; eudicotyledons; Gunneridae; Pentapetalae; rosids; malvids; Brassicales; Brassicaceae; Camelineae; Arabidopsis	-0.217873	0.505504	1.32926	1.26643	2.08258	2.13648	3.39265	1.31233	-1.73089	-3.60406	-3.61841	-1.10745	0.7409	-0.668876	0.526452	-2.31098	-0.0340493
1	Nsylvestris_NODE_10983_length_1990_cov_37	FBXL2_BOVIN^FBXL2_BOVIN^Q:1544-417,H:89-368^23.483%ID^E:7.88e-20^RecName: Full=F-box/LRR-repeat protein 2 {ECO:0000305};^Eukaryota; Metazoa; Chordata; Craniata; Vertebrata; Euteleostomi; Mammalia; Eutheria; Laurasiatheria; Cetartiodactyla; Ruminantia; Pecora; Bovidae; Bovinae; Bos`FBXL2_BOVIN^FBXL2_BOVIN^Q:962-426,H:81-258^26.776%ID^E:4.61e-09^RecName: Full=F-box/LRR-repeat protein 2 {ECO:0000305…	0.387014	1.44975	0.715895	0.0387105	-0.645407	0.715895	1.67023	1.29418	-0.662617	-0.378103	0.337383	0.0154551	0.223348	0.18538	-1.97735	-1.98454	-1.38523
1	Nsylvestris_NODE_10984_length_1990_cov_25	ZOG_PHALU^ZOG_PHALU^Q:1143-985,H:4-56^60.377%ID^E:1.14e-11^RecName: Full=Zeatin O-glucosyltransferase;^Eukaryota; Viridiplantae; Streptophyta; Embryophyta; Tracheophyta; Spermatophyta; Magnoliopsida; eudicotyledons; Gunneridae; Pentapetalae; rosids; fabids; Fabales; Fabaceae; Papilionoideae; 50 kb inversion clade; NPAAA clade; indigoferoid/millettioid clade; Phaseoleae; Phaseolus	0.116059	0.177969	-0.999418	-0.496917	-1.12495	0.624683	1.77317	-0.739392	1.05948	1.21962	0.692489	1.02472	1.26837	1.02797	-1.77703	-2.26245	-1.58438
1	Nsylvestris_NODE_10985_length_1989_cov_231	MCAC1_ARATH^MCAC1_ARATH^Q:498-1745,H:4-420^65.947%ID^E:0^RecName: Full=Protein MID1-COMPLEMENTING ACTIVITY 1;^Eukaryota; Viridiplantae; Streptophyta; Embryophyta; Tracheophyta; Spermatophyta; Magnoliopsida; eudicotyledons; Gunneridae; Pentapetalae; rosids; malvids; Brassicales; Brassicaceae; Camelineae; Arabidopsis	-0.00733591	0.292634	0.752244	0.129203	0.317367	1.57829	2.42728	1.82827	0.929804	0.564425	0.304011	0.861294	0.743812	0.255152	-2.99591	-4.23598	-3.74456
1	Nsylvestris_NODE_10986_length_1989_cov_230	GYP2_YEAST^GYP2_YEAST^Q:1171-254,H:240-538^31.889%ID^E:1.01e-39^RecName: Full=GTPase-activating protein GYP2;^Eukaryota; Fungi; Dikarya; Ascomycota; Saccharomycotina; Saccharomycetes; Saccharomycetales; Saccharomycetaceae; Saccharomyces	0.859805	1.02731	1.01875	0.726127	0.643695	0.693203	2.01541	1.28166	0.687388	0.705613	0.513958	0.568038	0.685599	0.164724	-4.45246	-3.13427	-4.00454
1	Nsylvestris_NODE_10987_length_1989_cov_225	LIP_STAHY^LIP_STAHY^Q:1395-361,H:309-640^27.882%ID^E:4.72e-25^RecName: Full=Lipase;^Bacteria; Firmicutes; Bacilli; Bacillales; Staphylococcaceae; Staphylococcus	0.640116	-0.0170096	0.58794	-0.441935	0.50336	-0.0856917	1.21873	0.879338	1.01744	-0.0583131	0.470567	0.118705	1.87981	0.512421	-2.66467	-2.12438	-2.43642
1	Nsylvestris_NODE_10989_length_1989_cov_159	RUTD_METPB^RUTD_METPB^Q:1666-818,H:13-257^26.829%ID^E:2.53e-12^RecName: Full=Putative aminoacrylate hydrolase RutD {ECO:0000255|HAMAP-Rule:MF_00832};^Bacteria; Proteobacteria; Alphaproteobacteria; Rhizobiales; Methylobacteriaceae; Methylorubrum	0.920229	0.946229	0.85233	0.293991	0.986118	0.327281	1.90084	1.37931	0.716209	0.802186	0.585632	-0.102531	0.736424	0.194402	-3.17363	-3.89577	-3.46926
1	Nsylvestris_NODE_10990_length_1989_cov_135	RBCMT_TOBAC^RBCMT_TOBAC^Q:84-1508,H:17-491^97.684%ID^E:0^RecName: Full=Ribulose-1,5 bisphosphate carboxylase/oxygenase large subunit N-methyltransferase, chloroplastic;^Eukaryota; Viridiplantae; Streptophyta; Embryophyta; Tracheophyta; Spermatophyta; Magnoliopsida; eudicotyledons; Gunneridae; Pentapetalae; asterids; lamiids; Solanales; Solanaceae; Nicotianoideae; Nicotianeae; Nicotiana	0.172571	1.04131	1.09589	0.625502	-0.165928	1.97109	2.47869	1.95131	0.536686	0.877005	1.1293	0.603245	0.206631	0.132724	-4.40395	-3.84813	-4.40395
1	Nsylvestris_NODE_10991_length_1989_cov_66	C75A2_SOLME^C75A2_SOLME^Q:344-1693,H:57-503^37.939%ID^E:4.58e-102^RecName: Full=Flavonoid 3',5'-hydroxylase;^Eukaryota; Viridiplantae; Streptophyta; Embryophyta; Tracheophyta; Spermatophyta; Magnoliopsida; eudicotyledons; Gunneridae; Pentapetalae; asterids; lamiids; Solanales; Solanaceae; Solanoideae; Solaneae; Solanum	-0.354334	1.54726	-0.26296	-0.62086	0.0531534	2.95165	2.77268	0.160239	0.726586	1.14602	1.17487	0.729207	-0.308307	-1.81337	-4.5402	-2.66442	-0.697222
1	Nsylvestris_NODE_10994_length_1988_cov_209	ERI2_HUMAN^ERI2_HUMAN^Q:1374-811,H:38-242^42.439%ID^E:1.5e-39^RecName: Full=ERI1 exoribonuclease 2;^Eukaryota; Metazoa; Chordata; Craniata; Vertebrata; Euteleostomi; Mammalia; Eutheria; Euarchontoglires; Primates; Haplorrhini; Catarrhini; Hominidae; Homo	0.655227	1.10897	0.177924	-0.133227	0.900459	0.640269	1.67251	1.60161	0.971342	0.927867	0.796199	0.479315	1.22128	0.401182	-3.68173	-3.45578	-4.28342
1	Nsylvestris_NODE_10995_length_1989_cov_204	FEI1_ARATH^FEI1_ARATH^Q:1712-54,H:27-566^51.175%ID^E:0^RecName: Full=LRR receptor-like serine/threonine-protein kinase FEI 1;^Eukaryota; Viridiplantae; Streptophyta; Embryophyta; Tracheophyta; Spermatophyta; Magnoliopsida; eudicotyledons; Gunneridae; Pentapetalae; rosids; malvids; Brassicales; Brassicaceae; Camelineae; Arabidopsis	-1.33585	1.7431	-0.0788424	-1.33585	1.33204	1.73539	2.65692	1.98246	-0.444434	1.12358	-0.335853	0.471502	0.244292	-0.75089	-2.33585	-2.33585	-2.33585
1	Nsylvestris_NODE_10999_length_1988_cov_66	.	1.22848	1.24361	1.50404	0.679127	0.549844	0.907396	1.50404	1.94216	0.20405	0.953452	1.07184	0.357198	1.28942	-0.084184	-4.45016	-4.45016	-4.45016
1	Nsylvestris_NODE_11_length_12805_cov_33	YI31B_YEAST^YI31B_YEAST^Q:7697-7272,H:636-771^41.549%ID^E:5.65e-34^RecName: Full=Transposon Ty3-I Gag-Pol polyprotein;^Eukaryota; Fungi; Dikarya; Ascomycota; Saccharomycotina; Saccharomycetes; Saccharomycetales; Saccharomycetaceae; Saccharomyces`YI31B_YEAST^YI31B_YEAST^Q:7290-6871,H:769-906^26.95%ID^E:5.65e-34^RecName: Full=Transposon Ty3-I Gag-Pol polyprotein;^Eukaryota; Fungi; Dikarya; Ascomyco…	1.82081	1.86622	0.862019	0.68045	0.454228	1.68574	2.81824	0.40251	-0.0806073	0.349757	0.517657	0.770445	0.507344	-0.338743	-2.97173	-4.67217	-4.67217
1	Nsylvestris_NODE_110_length_8341_cov_59	.	1.10801	0.780073	0.192927	0.261441	0.0554231	1.17694	2.54085	0.377351	0.404505	0.55699	0.125812	0.664232	-0.330574	-0.357212	-2.6389	-2.83088	-2.08699
1	Nsylvestris_NODE_1100_length_4821_cov_197	BT3_ARATH^BT3_ARATH^Q:1582-524,H:7-363^59.003%ID^E:3.06e-124^RecName: Full=BTB/POZ and TAZ domain-containing protein 3;^Eukaryota; Viridiplantae; Streptophyta; Embryophyta; Tracheophyta; Spermatophyta; Magnoliopsida; eudicotyledons; Gunneridae; Pentapetalae; rosids; malvids; Brassicales; Brassicaceae; Camelineae; Arabidopsis	0.359144	0.360241	0.738299	-0.24795	0.406153	0.326931	2.01597	1.88856	0.421525	0.620961	0.457203	0.364054	0.61698	0.295407	-2.62689	-2.86915	-3.12744
1	Nsylvestris_NODE_11003_length_1987_cov_63	.	0.70684	0.373559	0.299215	-0.150817	-0.683741	0.35306	2.05661	2.65779	1.48326	0.960962	2.90179	0.953628	1.29922	1.10987	-4.77375	-4.77375	-4.77375
1	Nsylvestris_NODE_11006_length_1987_cov_32	.	1.00983	0.445927	0.381797	0.445927	-0.377195	0.381797	1.20777	-0.492673	0.922365	-0.170744	1.26648	0.314682	0.244293	0.607184	-2.43609	-1.68807	-2.06328
1	Nsylvestris_NODE_11007_length_1987_cov_21	.	0.015086	0.567627	1.1082	0.430124	-0.72188	1.1082	1.83612	1.01509	1.23748	1.23748	1.1082	0.500513	1.31765	0.91555	-3.8918	-3.8918	-3.8918
1	Nsylvestris_NODE_11008_length_1987_cov_16	.	0.158667	0.158667	0.663711	-0.616881	-0.102925	0.573705	1.99997	0.480595	0.0331364	0.38106	0.661168	0.38106	-1.10437	-0.102925	-0.61894	-1.84133	-1.10437
1	Nsylvestris_NODE_11009_length_1986_cov_204	.	1.71979	0.466819	0.719478	-0.034841	-0.129397	1.27977	1.97793	1.50043	0.888567	1.51839	2.428	0.355384	1.57182	0.150113	-4.80408	-4.80408	-4.80408
1	Nsylvestris_NODE_11010_length_1986_cov_201	CRLK2_ARATH^CRLK2_ARATH^Q:473-1732,H:1-427^63.636%ID^E:0^RecName: Full=Calcium/calmodulin-regulated receptor-like kinase 2 {ECO:0000303|PubMed:21056039};^Eukaryota; Viridiplantae; Streptophyta; Embryophyta; Tracheophyta; Spermatophyta; Magnoliopsida; eudicotyledons; Gunneridae; Pentapetalae; rosids; malvids; Brassicales; Brassicaceae; Camelineae; Arabidopsis	0.489987	0.875804	1.01708	0.0327713	0.306771	0.877142	2.15444	2.13459	0.657661	0.462996	-0.0810486	0.935011	0.634787	-1.19937	-3.7739	-2.17065	-3.35407
1	Nsylvestris_NODE_11013_length_1986_cov_179	PGP1B_ARATH^PGP1B_ARATH^Q:1218-265,H:46-362^82.132%ID^E:0^RecName: Full=Phosphoglycolate phosphatase 1B, chloroplastic;^Eukaryota; Viridiplantae; Streptophyta; Embryophyta; Tracheophyta; Spermatophyta; Magnoliopsida; eudicotyledons; Gunneridae; Pentapetalae; rosids; malvids; Brassicales; Brassicaceae; Camelineae; Arabidopsis	0.656329	1.0427	0.58038	-0.00785079	0.552787	1.06313	1.89578	1.51541	0.494809	0.0873403	0.422797	0.203898	0.225094	0.216717	-2.48703	-3.43155	-3.03075
1	Nsylvestris_NODE_11014_length_1986_cov_149	CCD22_RAT^CCD22_RAT^Q:872-1471,H:400-600^33.333%ID^E:9.85e-18^RecName: Full=Coiled-coil domain-containing protein 22 {ECO:0000250|UniProtKB:O60826};^Eukaryota; Metazoa; Chordata; Craniata; Vertebrata; Euteleostomi; Mammalia; Eutheria; Euarchontoglires; Glires; Rodentia; Myomorpha; Muroidea; Muridae; Murinae; Rattus`CCD22_RAT^CCD22_RAT^Q:41-370,H:7-116^32.143%ID^E:1.18e-08^RecName: Full=Coiled-coi…	0.0965024	0.352649	0.39985	-0.329989	0.226348	1.01722	2.09066	1.11339	0.261926	-0.0404826	-0.63632	0.606245	0.422573	-0.0930345	-1.46353	-1.79755	-2.22646
1	Nsylvestris_NODE_11015_length_1986_cov_72	CALM_MALDO^CALM_MALDO^Q:1751-1662,H:1-30^90%ID^E:6.2e-08^RecName: Full=Calmodulin;^Eukaryota; Viridiplantae; Streptophyta; Embryophyta; Tracheophyta; Spermatophyta; Magnoliopsida; eudicotyledons; Gunneridae; Pentapetalae; rosids; fabids; Rosales; Rosaceae; Amygdaloideae; Maleae; Malus	0.26122	0.441346	1.95263	0.0293445	0.676732	0.599458	1.40584	0.685085	1.36227	1.95407	-0.68559	1.55302	0.679101	-0.201906	-3.31429	-4.46797	-2.93037
1	Nsylvestris_NODE_11016_length_1986_cov_68	RPC4_MOUSE^RPC4_MOUSE^Q:705-238,H:257-396^30.189%ID^E:4.01e-11^RecName: Full=DNA-directed RNA polymerase III subunit RPC4;^Eukaryota; Metazoa; Chordata; Craniata; Vertebrata; Euteleostomi; Mammalia; Eutheria; Euarchontoglires; Glires; Rodentia; Myomorpha; Muroidea; Muridae; Murinae; Mus; Mus	0.0201789	-0.376512	0.0227331	0.191902	0.040487	0.259875	2.25101	1.94339	1.245	0.460976	0.687667	1.08435	0.183556	-0.745185	-3.06133	-2.06133	-2.14677
1	Nsylvestris_NODE_1102_length_4820_cov_131	NFYA3_ARATH^NFYA3_ARATH^Q:3647-4198,H:122-311^47.895%ID^E:3.04e-40^RecName: Full=Nuclear transcription factor Y subunit A-3;^Eukaryota; Viridiplantae; Streptophyta; Embryophyta; Tracheophyta; Spermatophyta; Magnoliopsida; eudicotyledons; Gunneridae; Pentapetalae; rosids; malvids; Brassicales; Brassicaceae; Camelineae; Arabidopsis	1.10428	0.455756	0.589679	0.232776	1.18799	1.20258	2.35738	1.84981	0.894907	0.902342	1.08094	0.308794	1.00329	0.0015296	-3.95211	-4.34902	-4.87093
1	Nsylvestris_NODE_11021_length_1984_cov_216	STY13_ARATH^STY13_ARATH^Q:1499-330,H:25-411^78.626%ID^E:0^RecName: Full=Serine/threonine-protein kinase STY13 {ECO:0000305};^Eukaryota; Viridiplantae; Streptophyta; Embryophyta; Tracheophyta; Spermatophyta; Magnoliopsida; eudicotyledons; Gunneridae; Pentapetalae; rosids; malvids; Brassicales; Brassicaceae; Camelineae; Arabidopsis	0.947347	0.671331	-0.527404	-0.145645	0.529013	1.19103	2.37647	1.24051	0.995019	0.861693	0.644986	0.612683	1.31744	0.85019	-3.31637	-3.64075	-4.60755
1	Nsylvestris_NODE_11023_length_1984_cov_201	PBL26_ARATH^PBL26_ARATH^Q:1355-258,H:48-408^69.126%ID^E:1.17e-180^RecName: Full=Probable serine/threonine-protein kinase PBL26 {ECO:0000305};^Eukaryota; Viridiplantae; Streptophyta; Embryophyta; Tracheophyta; Spermatophyta; Magnoliopsida; eudicotyledons; Gunneridae; Pentapetalae; rosids; malvids; Brassicales; Brassicaceae; Camelineae; Arabidopsis	1.37224	-1.01025	2.34719	0.631296	1.38804	-0.71069	-0.208189	2.06102	-0.468849	-1.20142	1.99695	0.0696205	2.88644	-0.522711	-2.71069	-4.29565	-1.62436
1	Nsylvestris_NODE_11024_length_1984_cov_164	PIP24_MAIZE^PIP24_MAIZE^Q:127-864,H:1-252^80.952%ID^E:1.92e-140^RecName: Full=Aquaporin PIP2-4;^Eukaryota; Viridiplantae; Streptophyta; Embryophyta; Tracheophyta; Spermatophyta; Magnoliopsida; Liliopsida; Poales; Poaceae; PACMAD clade; Panicoideae; Andropogonodae; Andropogoneae; Tripsacinae; Zea`PIP24_MAIZE^PIP24_MAIZE^Q:1582-1695,H:252-288^78.947%ID^E:7.97e-10^RecName: Full=Aquaporin PIP2-4;^Euk…	0.587614	-0.25322	-0.074286	-0.267589	0.40556	-0.776905	1.21059	0.792935	1.28938	0.887786	1.01369	1.00451	1.7258	1.87893	-4.4989	-0.705563	-4.22034
1	Nsylvestris_NODE_11025_length_1984_cov_146	FB252_ARATH^FB252_ARATH^Q:1746-412,H:46-493^75.501%ID^E:0^RecName: Full=F-box protein At5g06550;^Eukaryota; Viridiplantae; Streptophyta; Embryophyta; Tracheophyta; Spermatophyta; Magnoliopsida; eudicotyledons; Gunneridae; Pentapetalae; rosids; malvids; Brassicales; Brassicaceae; Camelineae; Arabidopsis	-0.224446	0.734077	-0.761895	-0.480755	-0.122043	1.41656	1.64569	1.26409	1.27246	1.39798	0.305001	0.783034	0.23412	0.213076	-2.42057	-2.66744	-2.58893
1	Nsylvestris_NODE_11026_length_1984_cov_132	BAM3_ARATH^BAM3_ARATH^Q:79-1722,H:1-548^72.232%ID^E:0^RecName: Full=Beta-amylase 3, chloroplastic;^Eukaryota; Viridiplantae; Streptophyta; Embryophyta; Tracheophyta; Spermatophyta; Magnoliopsida; eudicotyledons; Gunneridae; Pentapetalae; rosids; malvids; Brassicales; Brassicaceae; Camelineae; Arabidopsis	0.54635	0.0374288	0.248544	-0.232459	-0.0524933	-0.454852	0.419617	0.287873	0.671681	1.91438	2.57578	0.655066	1.55593	0.946597	-3.03981	-3.03981	-3.03981
1	Nsylvestris_NODE_11027_length_1984_cov_113	.	0.714746	0.737135	-0.110343	-0.267635	0.970773	0.541893	1.44918	0.870908	0.332885	0.752426	0.169451	0.325279	1.2214	-0.0841541	-2.53152	-2.28224	-2.81019
1	Nsylvestris_NODE_11031_length_1983_cov_219	ODPB1_ORYSJ^ODPB1_ORYSJ^Q:456-1475,H:39-374^90.294%ID^E:0^RecName: Full=Pyruvate dehydrogenase E1 component subunit beta-1, mitochondrial;^Eukaryota; Viridiplantae; Streptophyta; Embryophyta; Tracheophyta; Spermatophyta; Magnoliopsida; Liliopsida; Poales; Poaceae; BOP clade; Oryzoideae; Oryzeae; Oryzinae; Oryza; Oryza sativa	0.463502	0.62414	-0.115059	-0.210076	0.147812	0.272791	1.28338	1.0579	0.744022	0.398093	0.209629	0.238926	0.878079	0.405848	-2.25672	-1.99148	-2.15079
1	Nsylvestris_NODE_11035_length_1983_cov_98	CSLA9_ARATH^CSLA9_ARATH^Q:1853-285,H:12-532^75.573%ID^E:0^RecName: Full=Glucomannan 4-beta-mannosyltransferase 9 {ECO:0000305};^Eukaryota; Viridiplantae; Streptophyta; Embryophyta; Tracheophyta; Spermatophyta; Magnoliopsida; eudicotyledons; Gunneridae; Pentapetalae; rosids; malvids; Brassicales; Brassicaceae; Camelineae; Arabidopsis	-1.17645	0.0927346	0.468883	-0.507658	-0.0524633	1.35832	2.22814	1.31293	0.687893	0.492342	-2.55496	0.0927346	1.39613	-0.374391	0.279613	-3.13993	-0.603873
1	Nsylvestris_NODE_11036_length_1983_cov_54	TGA23_ORYSJ^TGA23_ORYSJ^Q:747-1610,H:27-312^75.694%ID^E:3.64e-131^RecName: Full=Transcription factor TGA2.3 {ECO:0000305};^Eukaryota; Viridiplantae; Streptophyta; Embryophyta; Tracheophyta; Spermatophyta; Magnoliopsida; Liliopsida; Poales; Poaceae; BOP clade; Oryzoideae; Oryzeae; Oryzinae; Oryza; Oryza sativa	1.3142	1.12155	-0.685805	-0.132444	0.39996	1.22109	1.89916	0.636123	-1.04426	1.01463	-0.685805	-2.6858	-0.689416	-1.6858	-0.685805	0.314195	0.374242
1	Nsylvestris_NODE_11037_length_1983_cov_39	.	0.961405	0.614992	0.804436	-1.11126	0.290838	-0.278887	1.64907	0.377317	-1.69806	0.518393	0.779841	1.4427	-0.763075	0.723178	-2.05355	-0.760186	-1.49715
1	Nsylvestris_NODE_11038_length_1983_cov_32	.	-0.144872	1.27017	0.729597	0.270166	0.0775204	0.855128	1.85513	0.440091	0.417472	-0.407906	1.35763	0.440091	0.440091	-0.410795	-1.72983	-2.72983	-2.72983
1	Nsylvestris_NODE_11039_length_1983_cov_22	.	0.809641	1.03174	0.37941	-1.41275	0.707158	0.587249	1.70605	0.625217	0.254762	0.809641	-0.412751	-0.171928	1.00229	-0.190359	-1.99771	-2.00495	-1.72271
1	Nsylvestris_NODE_1104_length_4819_cov_125	.	0.779042	0.835076	0.485666	0.051568	0.00347372	1.0217	1.90873	0.779042	1.3579	1.30168	1.20309	1.34203	0.893244	0.675266	-3.87917	-4.87917	-3.87917
1	Nsylvestris_NODE_11042_length_1983_cov_226	SMU2_ARATH^SMU2_ARATH^Q:188-1765,H:28-582^67.207%ID^E:0^RecName: Full=Suppressor of mec-8 and unc-52 protein homolog 2;^Eukaryota; Viridiplantae; Streptophyta; Embryophyta; Tracheophyta; Spermatophyta; Magnoliopsida; eudicotyledons; Gunneridae; Pentapetalae; rosids; malvids; Brassicales; Brassicaceae; Camelineae; Arabidopsis	0.514598	0.162714	0.557579	-0.23963	0.213984	1.423	2.3189	1.45051	1.14628	0.940059	0.979129	0.639288	1.5411	0.848638	-4.6035	-4.01898	-3.87367
1	Nsylvestris_NODE_11046_length_1982_cov_92	KTNB1_HUMAN^KTNB1_HUMAN^Q:794-1540,H:21-252^25.391%ID^E:7e-07^RecName: Full=Katanin p80 WD40 repeat-containing subunit B1 {ECO:0000255|HAMAP-Rule:MF_03022};^Eukaryota; Metazoa; Chordata; Craniata; Vertebrata; Euteleostomi; Mammalia; Eutheria; Euarchontoglires; Primates; Haplorrhini; Catarrhini; Hominidae; Homo	0.465863	1.15129	-0.672602	-1.1191	0.68863	0.980655	2.17783	1.46827	0.327879	1.44361	0.668637	0.813786	1.32812	1.00553	-3.57853	-3.57853	-3.57134
1	Nsylvestris_NODE_11048_length_1982_cov_37	SSH4_COCIM^SSH4_COCIM^Q:1018-1506,H:220-378^28.324%ID^E:1.73e-06^RecName: Full=Protein SSH4;^Eukaryota; Fungi; Dikarya; Ascomycota; Pezizomycotina; Eurotiomycetes; Eurotiomycetidae; Onygenales; Onygenales incertae sedis; Coccidioides	0.635723	0.858116	0.858802	-2.5342	-0.534202	1.05076	2.05076	1.4658	0.926541	0.432044	1.41999	1.22389	1.82335	0.92523	-3.5342	-3.5342	-3.5342
1	Nsylvestris_NODE_11049_length_1981_cov_221	DTX27_ARATH^DTX27_ARATH^Q:247-1626,H:24-483^71.522%ID^E:0^RecName: Full=Protein DETOXIFICATION 27 {ECO:0000303|PubMed:11739388};^Eukaryota; Viridiplantae; Streptophyta; Embryophyta; Tracheophyta; Spermatophyta; Magnoliopsida; eudicotyledons; Gunneridae; Pentapetalae; rosids; malvids; Brassicales; Brassicaceae; Camelineae; Arabidopsis	1.3071	-0.174086	-0.0600192	-0.704522	0.148121	1.02026	2.28848	1.68337	1.11693	-0.196903	1.40518	0.177063	1.00603	0.980577	-3.16752	-2.29643	-4.53363
1	Nsylvestris_NODE_1105_length_4819_cov_49	.	0.764034	0.293184	-0.268544	-0.217883	-0.313676	0.250157	1.41494	0.330108	0.564102	0.72991	0.727411	0.473008	0.630845	0.435188	-2.06851	-1.92628	-1.81799
1	Nsylvestris_NODE_11050_length_1981_cov_221	C82C4_ARATH^C82C4_ARATH^Q:1798-362,H:37-523^44.625%ID^E:2.92e-141^RecName: Full=Xanthotoxin 5-hydroxylase CYP82C4 {ECO:0000305|PubMed:18291319};^Eukaryota; Viridiplantae; Streptophyta; Embryophyta; Tracheophyta; Spermatophyta; Magnoliopsida; eudicotyledons; Gunneridae; Pentapetalae; rosids; malvids; Brassicales; Brassicaceae; Camelineae; Arabidopsis	0.356089	0.38839	0.148142	-0.773398	0.864318	1.07898	1.76702	2.8949	0.188934	0.0148752	0.69652	-0.496515	-0.365055	-0.675704	-2.66865	-0.956659	-2.4622
1	Nsylvestris_NODE_11051_length_1981_cov_175	ACT1_TOBAC^ACT1_TOBAC^Q:661-1791,H:1-377^98.408%ID^E:0^RecName: Full=Actin;^Eukaryota; Viridiplantae; Streptophyta; Embryophyta; Tracheophyta; Spermatophyta; Magnoliopsida; eudicotyledons; Gunneridae; Pentapetalae; asterids; lamiids; Solanales; Solanaceae; Nicotianoideae; Nicotianeae; Nicotiana	1.07861	-0.414556	2.44515	-1.277	1.30308	-3.06721	-2.69343	0.216989	1.1683	0.636011	3.39013	-1.25007	5.53642	0.577661	-2.03326	-3.8809	-1.73591
1	Nsylvestris_NODE_11052_length_1981_cov_163	.	0.580193	1.6406	0.78788	-0.112075	0.255559	0.222283	1.51402	1.67914	0.985986	1.06635	1.25556	1.29939	0.253069	0.369525	-4.43579	-3.97506	-3.38664
1	Nsylvestris_NODE_11053_length_1981_cov_144	PAE8_ARATH^PAE8_ARATH^Q:200-1342,H:9-385^55.906%ID^E:3.17e-153^RecName: Full=Pectin acetylesterase 8 {ECO:0000303|PubMed:25115560};^Eukaryota; Viridiplantae; Streptophyta; Embryophyta; Tracheophyta; Spermatophyta; Magnoliopsida; eudicotyledons; Gunneridae; Pentapetalae; rosids; malvids; Brassicales; Brassicaceae; Camelineae; Arabidopsis	-2.96585	0.0385208	-0.286028	-0.369262	-0.349711	3.03874	4.55562	3.47403	0.727028	-0.181691	0.043748	0.635939	1.29456	0.784882	-4.00849	-2.42353	-4.00849
1	Nsylvestris_NODE_11055_length_1981_cov_83	Y4095_ARATH^Y4095_ARATH^Q:1839-1384,H:28-183^30.114%ID^E:3.48e-06^RecName: Full=Uncharacterized protein At4g00950;^Eukaryota; Viridiplantae; Streptophyta; Embryophyta; Tracheophyta; Spermatophyta; Magnoliopsida; eudicotyledons; Gunneridae; Pentapetalae; rosids; malvids; Brassicales; Brassicaceae; Camelineae; Arabidopsis	0.845409	1.0509	0.713523	0.0786864	0.872823	0.861217	1.3701	0.906732	0.221689	0.316203	-0.311068	-0.346088	0.538942	-0.255463	-3.10226	-0.825165	-2.93618
1	Nsylvestris_NODE_11059_length_1981_cov_16	PP435_ARATH^PP435_ARATH^Q:1892-288,H:2-532^54.206%ID^E:0^RecName: Full=Putative pentatricopeptide repeat-containing protein At5g59200, chloroplastic;^Eukaryota; Viridiplantae; Streptophyta; Embryophyta; Tracheophyta; Spermatophyta; Magnoliopsida; eudicotyledons; Gunneridae; Pentapetalae; rosids; malvids; Brassicales; Brassicaceae; Camelineae; Arabidopsis	0.124083	0.969892	0.495515	-0.610699	0.429125	0.986579	1.41954	-0.335349	0.866285	0.463738	0.146208	1.30851	-0.398004	-2.17831	-0.923923	-1.60417	-1.15903
1	Nsylvestris_NODE_1106_length_4817_cov_226	UBP12_ARATH^UBP12_ARATH^Q:3986-618,H:1-1116^83.289%ID^E:0^RecName: Full=Ubiquitin carboxyl-terminal hydrolase 12;^Eukaryota; Viridiplantae; Streptophyta; Embryophyta; Tracheophyta; Spermatophyta; Magnoliopsida; eudicotyledons; Gunneridae; Pentapetalae; rosids; malvids; Brassicales; Brassicaceae; Camelineae; Arabidopsis	0.318148	0.169101	0.322375	-0.510478	-0.0824982	0.953092	1.94034	1.03371	0.958948	0.539322	0.880474	0.48167	0.940447	0.441239	-2.75431	-2.44181	-3.18977
1	Nsylvestris_NODE_11065_length_1980_cov_194	UBC38_ARATH^UBC38_ARATH^Q:788-1540,H:45-296^58.73%ID^E:1.7e-99^RecName: Full=Putative ubiquitin-conjugating enzyme E2 38;^Eukaryota; Viridiplantae; Streptophyta; Embryophyta; Tracheophyta; Spermatophyta; Magnoliopsida; eudicotyledons; Gunneridae; Pentapetalae; rosids; malvids; Brassicales; Brassicaceae; Camelineae; Arabidopsis	-0.208451	0.22187	0.0196271	-0.857939	0.6777	-0.0354884	1.55391	1.10296	0.786379	0.542893	-0.252919	1.25531	0.31185	-0.417973	-1.94881	-1.65016	-1.10075
1	Nsylvestris_NODE_11066_length_1980_cov_168	DPNPH_ARATH^DPNPH_ARATH^Q:1790-672,H:9-373^64.815%ID^E:5.97e-160^RecName: Full=PAP-specific phosphatase HAL2-like;^Eukaryota; Viridiplantae; Streptophyta; Embryophyta; Tracheophyta; Spermatophyta; Magnoliopsida; eudicotyledons; Gunneridae; Pentapetalae; rosids; malvids; Brassicales; Brassicaceae; Camelineae; Arabidopsis	0.733459	0.89369	0.34268	-0.356499	0.656484	0.885853	2.25168	2.2559	0.568463	1.33669	0.593385	1.09176	1.45359	0.694882	-4.43842	-3.6977	-5.26589
1	Nsylvestris_NODE_11068_length_1980_cov_135	CIA2_ARATH^CIA2_ARATH^Q:1184-63,H:3-385^36.591%ID^E:5.1e-34^RecName: Full=Protein CHLOROPLAST IMPORT APPARATUS 2;^Eukaryota; Viridiplantae; Streptophyta; Embryophyta; Tracheophyta; Spermatophyta; Magnoliopsida; eudicotyledons; Gunneridae; Pentapetalae; rosids; malvids; Brassicales; Brassicaceae; Camelineae; Arabidopsis	0.322859	0.824759	0.595277	-0.0147766	0.412547	1.55313	1.9778	1.54465	0.644187	0.691492	1.3523	0.437181	1.26117	1.18554	-4.2627	-4.2627	-4.2627
1	Nsylvestris_NODE_1107_length_4817_cov_198	PTR19_ARATH^PTR19_ARATH^Q:4651-2945,H:2-573^70.537%ID^E:0^RecName: Full=Protein NRT1/ PTR FAMILY 4.6;^Eukaryota; Viridiplantae; Streptophyta; Embryophyta; Tracheophyta; Spermatophyta; Magnoliopsida; eudicotyledons; Gunneridae; Pentapetalae; rosids; malvids; Brassicales; Brassicaceae; Camelineae; Arabidopsis	0.816985	0.909562	-0.123149	-0.48553	0.579789	1.36655	2.19433	1.67523	1.17759	0.99203	0.411925	0.656863	1.17107	0.747527	-3.76071	-4.18916	-4.14091
1	Nsylvestris_NODE_11070_length_1980_cov_77	ATL41_ORYSJ^ATL41_ORYSJ^Q:648-1643,H:3-383^41.253%ID^E:1.34e-62^RecName: Full=E3 ubiquitin-protein ligase Os04g0590900;^Eukaryota; Viridiplantae; Streptophyta; Embryophyta; Tracheophyta; Spermatophyta; Magnoliopsida; Liliopsida; Poales; Poaceae; BOP clade; Oryzoideae; Oryzeae; Oryzinae; Oryza; Oryza sativa	0.578186	0.638384	1.12759	-0.244936	-0.244936	1.34003	1.88751	0.639587	1.36678	0.850599	1.14209	0.906623	1.85008	-0.0014545	-3.94538	-3.94538	-3.94538
1	Nsylvestris_NODE_11071_length_1980_cov_67	CRF2_ARATH^CRF2_ARATH^Q:1366-299,H:4-342^38.832%ID^E:2.31e-39^RecName: Full=Ethylene-responsive transcription factor CRF2;^Eukaryota; Viridiplantae; Streptophyta; Embryophyta; Tracheophyta; Spermatophyta; Magnoliopsida; eudicotyledons; Gunneridae; Pentapetalae; rosids; malvids; Brassicales; Brassicaceae; Camelineae; Arabidopsis	0.384157	1.60792	0.384157	0.979766	0.572722	1.05654	1.21002	0.871872	0.715883	0.342965	0.336904	0.328599	0.0608922	0.550515	-2.76666	-3.27988	-3.35638
1	Nsylvestris_NODE_11075_length_1979_cov_148	EMB8_PICGL^EMB8_PICGL^Q:1953-925,H:17-359^58.757%ID^E:1.25e-104^RecName: Full=Embryogenesis-associated protein EMB8;^Eukaryota; Viridiplantae; Streptophyta; Embryophyta; Tracheophyta; Spermatophyta; Pinidae; Pinales; Pinaceae; Picea	1.07798	0.94092	0.0175738	-0.61959	0.0127688	0.439006	1.48895	0.828266	0.696358	0.733885	0.458904	0.240865	0.744883	0.142155	-2.34294	-1.65356	-3.20642
1	Nsylvestris_NODE_11076_length_1979_cov_137	GOS11_ARATH^GOS11_ARATH^Q:1878-1627,H:1-87^72.414%ID^E:2.5e-34^RecName: Full=Golgi SNAP receptor complex member 1-1;^Eukaryota; Viridiplantae; Streptophyta; Embryophyta; Tracheophyta; Spermatophyta; Magnoliopsida; eudicotyledons; Gunneridae; Pentapetalae; rosids; malvids; Brassicales; Brassicaceae; Camelineae; Arabidopsis	0.884797	0.985087	0.47279	0.570119	0.468057	1.39826	2.75357	2.03333	0.367463	0.369685	0.606638	-0.0284318	1.44657	0.381057	-3.04694	-5.13779	-4.52426
1	Nsylvestris_NODE_11078_length_1979_cov_121	TLP7_ARATH^TLP7_ARATH^Q:1716-682,H:21-379^71.031%ID^E:0^RecName: Full=Tubby-like F-box protein 7;^Eukaryota; Viridiplantae; Streptophyta; Embryophyta; Tracheophyta; Spermatophyta; Magnoliopsida; eudicotyledons; Gunneridae; Pentapetalae; rosids; malvids; Brassicales; Brassicaceae; Camelineae; Arabidopsis	1.18072	0.777741	-0.265404	-0.0652911	1.01643	0.892818	2.2903	1.90825	1.15998	0.688335	1.09229	0.993759	1.21425	0.916817	-3.67181	-4.48284	-5.64634
1	Nsylvestris_NODE_11079_length_1979_cov_115	GAM1_ORYSI^GAM1_ORYSI^Q:1506-424,H:4-387^43.655%ID^E:1.72e-84^RecName: Full=Transcription factor GAMYB;^Eukaryota; Viridiplantae; Streptophyta; Embryophyta; Tracheophyta; Spermatophyta; Magnoliopsida; Liliopsida; Poales; Poaceae; BOP clade; Oryzoideae; Oryzeae; Oryzinae; Oryza; Oryza sativa	2.11495	1.62564	-0.227358	0.435055	0.0411311	1.66194	2.34663	0.308469	0.679358	1.42268	1.61214	0.378223	2.26391	1.39759	-5.68679	-5.68679	-4.68679
1	Nsylvestris_NODE_1108_length_4817_cov_174	KN5C_TOBAC^KN5C_TOBAC^Q:4129-1112,H:1-1006^96.62%ID^E:0^RecName: Full=Kinesin-like protein KIN-5C {ECO:0000305};^Eukaryota; Viridiplantae; Streptophyta; Embryophyta; Tracheophyta; Spermatophyta; Magnoliopsida; eudicotyledons; Gunneridae; Pentapetalae; asterids; lamiids; Solanales; Solanaceae; Nicotianoideae; Nicotianeae; Nicotiana	0.808442	1.37292	1.09445	0.914743	0.656279	1.75518	1.58079	1.38795	0.68059	1.57524	0.918464	0.458302	0.311565	-0.568237	-4.84548	-3.25571	-4.84548
1	Nsylvestris_NODE_11083_length_1978_cov_204	ZDHC9_ARATH^ZDHC9_ARATH^Q:1504-488,H:10-342^57.227%ID^E:3.18e-115^RecName: Full=Probable protein S-acyltransferase 7;^Eukaryota; Viridiplantae; Streptophyta; Embryophyta; Tracheophyta; Spermatophyta; Magnoliopsida; eudicotyledons; Gunneridae; Pentapetalae; rosids; malvids; Brassicales; Brassicaceae; Camelineae; Arabidopsis	-1.1863	-2.78569	-0.329554	-2.51542	-0.338831	1.84974	3.01942	2.61678	1.53189	1.41018	1.55735	2.07928	3.37926	1.81091	-3.73115	-5.36342	-3.00446
1	Nsylvestris_NODE_11084_length_1978_cov_156	HIS7_PEA^HIS7_PEA^Q:1842-1282,H:28-221^70.918%ID^E:1.09e-81^RecName: Full=Imidazoleglycerol-phosphate dehydratase, chloroplastic {ECO:0000303|Ref.1};^Eukaryota; Viridiplantae; Streptophyta; Embryophyta; Tracheophyta; Spermatophyta; Magnoliopsida; eudicotyledons; Gunneridae; Pentapetalae; rosids; fabids; Fabales; Fabaceae; Papilionoideae; 50 kb inversion clade; NPAAA clade; Hologalegina; IRL clade…	0.83843	0.916465	0.95661	0.372218	0.436051	1.53125	1.88519	1.30592	0.415611	0.475285	0.793848	0.512239	0.277294	-0.24781	-3.1179	-4.36583	-2.98486
1	Nsylvestris_NODE_11085_length_1978_cov_103	MAP1D_ARATH^MAP1D_ARATH^Q:90-701,H:1-203^72.059%ID^E:4.28e-94^RecName: Full=Methionine aminopeptidase 1D, chloroplastic/mitochondrial {ECO:0000255|HAMAP-Rule:MF_03174};^Eukaryota; Viridiplantae; Streptophyta; Embryophyta; Tracheophyta; Spermatophyta; Magnoliopsida; eudicotyledons; Gunneridae; Pentapetalae; rosids; malvids; Brassicales; Brassicaceae; Camelineae; Arabidopsis	0.922411	1.49949	0.538835	0.468157	0.77832	1.67008	2.06204	1.53884	0.866687	0.941453	0.745597	0.351754	0.746549	0.607653	-3.42266	-6.17541	-4.13979
1	Nsylvestris_NODE_11087_length_1978_cov_66	PT505_ARATH^PT505_ARATH^Q:279-719,H:3-149^84.354%ID^E:1.01e-80^RecName: Full=Probable sugar phosphate/phosphate translocator At5g05820;^Eukaryota; Viridiplantae; Streptophyta; Embryophyta; Tracheophyta; Spermatophyta; Magnoliopsida; eudicotyledons; Gunneridae; Pentapetalae; rosids; malvids; Brassicales; Brassicaceae; Camelineae; Arabidopsis	-0.595275	1.18316	0.502197	-0.680651	-0.0127889	0.788178	1.2885	0.862581	0.608617	-0.0856592	0.9389	-0.0453794	-0.161491	-0.31706	-0.930878	-1.54901	-1.79394
1	Nsylvestris_NODE_11089_length_1977_cov_11	.	-0.249952	0.919973	0.789186	-0.740679	-0.836719	1.36083	2.07366	0.654371	0.925838	0.252548	-0.134475	0.970893	1.02803	0.32132	-2.83491	-2.24995	-2.24995
1	Nsylvestris_NODE_1109_length_4815_cov_151	C3H32_ARATH^C3H32_ARATH^Q:1389-2675,H:1-429^59.174%ID^E:2.54e-165^RecName: Full=Zinc finger CCCH domain-containing protein 32;^Eukaryota; Viridiplantae; Streptophyta; Embryophyta; Tracheophyta; Spermatophyta; Magnoliopsida; eudicotyledons; Gunneridae; Pentapetalae; rosids; malvids; Brassicales; Brassicaceae; Camelineae; Arabidopsis	0.708481	0.990427	-0.401838	0.0898749	0.866849	1.51176	2.19324	1.2452	0.523978	0.650313	-0.0582456	0.205765	0.729508	0.0134297	-3.21812	-3.34754	-2.70309
1	Nsylvestris_NODE_11093_length_1977_cov_102	ERECT_ARATH^ERECT_ARATH^Q:446-1420,H:19-345^32.537%ID^E:7.99e-28^RecName: Full=LRR receptor-like serine/threonine-protein kinase ERECTA {ECO:0000303|PubMed:8624444};^Eukaryota; Viridiplantae; Streptophyta; Embryophyta; Tracheophyta; Spermatophyta; Magnoliopsida; eudicotyledons; Gunneridae; Pentapetalae; rosids; malvids; Brassicales; Brassicaceae; Camelineae; Arabidopsis`ERECT_ARATH^ERECT_ARATH^Q:…	-0.134956	1.4344	1.40741	0.409664	0.907688	1.18697	1.74546	1.33635	2.17154	0.491377	-0.759474	1.62323	1.44935	-0.687497	-3.39275	-4.59439	-4.59439
1	Nsylvestris_NODE_11094_length_1977_cov_63	NFD4_ARATH^NFD4_ARATH^Q:1043-333,H:346-565^28.452%ID^E:5.14e-11^RecName: Full=Protein NUCLEAR FUSION DEFECTIVE 4 {ECO:0000303|PubMed:16698901};^Eukaryota; Viridiplantae; Streptophyta; Embryophyta; Tracheophyta; Spermatophyta; Magnoliopsida; eudicotyledons; Gunneridae; Pentapetalae; rosids; malvids; Brassicales; Brassicaceae; Camelineae; Arabidopsis`NFD4_ARATH^NFD4_ARATH^Q:1949-1587,H:77-196^30.32…	2.59455	1.10248	0.920733	-0.192705	0.137389	0.809702	1.13163	0.809702	1.2735	0.546667	1.08471	-1.77526	-0.190298	-0.955593	-1.74669	-2.77526	-2.77526
1	Nsylvestris_NODE_11095_length_1977_cov_26	.	-0.106134	-0.39564	1.89387	-0.106134	0.60436	1.43443	1.68236	1.38863	1.24179	0.24179	-0.39564	0.341325	0.682362	0.60436	-1.9806	-3.56557	-3.56557
1	Nsylvestris_NODE_11097_length_1976_cov_229	DEK_MOUSE^DEK_MOUSE^Q:1637-1230,H:62-190^33.088%ID^E:3.54e-12^RecName: Full=Protein DEK;^Eukaryota; Metazoa; Chordata; Craniata; Vertebrata; Euteleostomi; Mammalia; Eutheria; Euarchontoglires; Glires; Rodentia; Myomorpha; Muroidea; Muridae; Murinae; Mus; Mus	1.53236	1.08136	2.87729	1.5268	1.55783	4.1424	3.45618	1.65302	-0.601697	-0.119906	0.0488382	-1.43201	-0.389326	-0.866639	-3.72781	-5.36935	-5.36935
1	Nsylvestris_NODE_1110_length_4814_cov_202	CIP7_ARATH^CIP7_ARATH^Q:4322-3711,H:1-218^37.727%ID^E:6.77e-33^RecName: Full=COP1-interacting protein 7 {ECO:0000303|PubMed:9668129};^Eukaryota; Viridiplantae; Streptophyta; Embryophyta; Tracheophyta; Spermatophyta; Magnoliopsida; eudicotyledons; Gunneridae; Pentapetalae; rosids; malvids; Brassicales; Brassicaceae; Camelineae; Arabidopsis	0.340709	1.219	1.53537	1.03359	1.46828	1.21002	2.53032	1.07251	0.572222	0.79408	0.631947	1.26352	1.0178	0.230593	-4.28868	-6.37615	-4.25513
1	Nsylvestris_NODE_11101_length_1976_cov_64	AMT2_ARATH^AMT2_ARATH^Q:119-1573,H:3-475^73.814%ID^E:0^RecName: Full=Ammonium transporter 2;^Eukaryota; Viridiplantae; Streptophyta; Embryophyta; Tracheophyta; Spermatophyta; Magnoliopsida; eudicotyledons; Gunneridae; Pentapetalae; rosids; malvids; Brassicales; Brassicaceae; Camelineae; Arabidopsis	0.247965	0.325436	0.0327979	-0.920494	1.59646	-2.34934	-0.072497	-1.14289	1.67889	1.68486	0.835309	2.40686	1.85103	0.744639	-2.40361	-1.85522	-2.66021
1	Nsylvestris_NODE_11104_length_1975_cov_212	PP176_ARATH^PP176_ARATH^Q:1452-112,H:48-503^61.572%ID^E:0^RecName: Full=Pentatricopeptide repeat-containing protein At2g30100, chloroplastic;^Eukaryota; Viridiplantae; Streptophyta; Embryophyta; Tracheophyta; Spermatophyta; Magnoliopsida; eudicotyledons; Gunneridae; Pentapetalae; rosids; malvids; Brassicales; Brassicaceae; Camelineae; Arabidopsis	1.29003	0.650267	-0.285236	-0.135177	0.636697	0.713787	1.63924	0.55212	1.04612	0.743142	0.67054	0.422643	1.28152	0.377505	-4.02048	-1.74779	-3.83494
1	Nsylvestris_NODE_11105_length_1975_cov_187	BGL46_ARATH^BGL46_ARATH^Q:312-1703,H:37-504^57.906%ID^E:0^RecName: Full=Beta-glucosidase 46;^Eukaryota; Viridiplantae; Streptophyta; Embryophyta; Tracheophyta; Spermatophyta; Magnoliopsida; eudicotyledons; Gunneridae; Pentapetalae; rosids; malvids; Brassicales; Brassicaceae; Camelineae; Arabidopsis	-0.365228	0.735884	1.06357	0.440083	1.03879	1.13035	1.72579	1.72271	0.203092	-0.161708	0.0350501	-0.279708	1.4773	0.894728	-2.80658	-3.23771	-3.61641
1	Nsylvestris_NODE_11106_length_1975_cov_167	P2C38_ARATH^P2C38_ARATH^Q:1541-405,H:4-378^75%ID^E:0^RecName: Full=Probable protein phosphatase 2C 38 {ECO:0000305};^Eukaryota; Viridiplantae; Streptophyta; Embryophyta; Tracheophyta; Spermatophyta; Magnoliopsida; eudicotyledons; Gunneridae; Pentapetalae; rosids; malvids; Brassicales; Brassicaceae; Camelineae; Arabidopsis	0.241697	0.964715	0.0113725	-0.405918	0.521338	1.60743	2.39652	1.76097	0.655178	0.412054	-0.130464	0.638609	1.21539	0.474831	-4.7569	-2.39281	-3.214
1	Nsylvestris_NODE_11109_length_1975_cov_51	TAF11_ARATH^TAF11_ARATH^Q:657-968,H:107-210^75%ID^E:4.95e-48^RecName: Full=Transcription initiation factor TFIID subunit 11;^Eukaryota; Viridiplantae; Streptophyta; Embryophyta; Tracheophyta; Spermatophyta; Magnoliopsida; eudicotyledons; Gunneridae; Pentapetalae; rosids; malvids; Brassicales; Brassicaceae; Camelineae; Arabidopsis	0.258881	0.833461	0.266816	-0.614727	-0.897284	0.995528	1.99433	0.803497	0.248499	0.0785736	0.504838	0.270768	0.490339	-0.526364	-1.61692	-1.4965	-1.59374
1	Nsylvestris_NODE_1111_length_4811_cov_144	FPA_ARATH^FPA_ARATH^Q:4580-1797,H:17-879^40.205%ID^E:0^RecName: Full=Flowering time control protein FPA;^Eukaryota; Viridiplantae; Streptophyta; Embryophyta; Tracheophyta; Spermatophyta; Magnoliopsida; eudicotyledons; Gunneridae; Pentapetalae; rosids; malvids; Brassicales; Brassicaceae; Camelineae; Arabidopsis`FPA_ARATH^FPA_ARATH^Q:4583-4137,H:93-278^23.529%ID^E:1.16e-08^RecName: Full=Flowering t…	0.988961	0.696033	-0.676455	-0.670424	0.35197	1.16497	1.88032	1.17379	0.541119	0.829089	0.919759	-1.0381	1.36519	0.56295	-2.97144	-1.59586	-3.52186
1	Nsylvestris_NODE_11113_length_1974_cov_193	Y3913_ARATH^Y3913_ARATH^Q:978-250,H:266-497^50%ID^E:1.32e-73^RecName: Full=Uncharacterized protein At3g49140;^Eukaryota; Viridiplantae; Streptophyta; Embryophyta; Tracheophyta; Spermatophyta; Magnoliopsida; eudicotyledons; Gunneridae; Pentapetalae; rosids; malvids; Brassicales; Brassicaceae; Camelineae; Arabidopsis`Y3913_ARATH^Y3913_ARATH^Q:1548-1156,H:77-206^52.672%ID^E:1.71e-37^RecName: Full=Un…	0.408145	0.703001	0.979663	0.408904	1.0959	1.33851	1.76457	0.424415	0.570459	0.12298	0.952798	0.311173	0.932008	-0.259607	-3.29982	-3.06348	-3.38963
1	Nsylvestris_NODE_11114_length_1974_cov_183	GID1C_ARATH^GID1C_ARATH^Q:446-1444,H:11-342^80.781%ID^E:0^RecName: Full=Gibberellin receptor GID1C;^Eukaryota; Viridiplantae; Streptophyta; Embryophyta; Tracheophyta; Spermatophyta; Magnoliopsida; eudicotyledons; Gunneridae; Pentapetalae; rosids; malvids; Brassicales; Brassicaceae; Camelineae; Arabidopsis	-0.211568	0.124538	-0.483765	-0.975204	-0.0231301	0.00857871	1.32208	2.08627	0.517118	-0.137512	0.27631	-0.4002	1.10692	0.584102	-1.55336	0.236427	-2.4776
1	Nsylvestris_NODE_11117_length_1974_cov_99	.	0.104722	1.29939	0.247209	-0.0319707	0.732716	2.65942	3.17394	2.01527	0.510055	0.692593	-0.0354048	0.417636	0.975897	0.517574	-4.42635	-4.42635	-4.42635
1	Nsylvestris_NODE_1112_length_4810_cov_135	Y2239_ARATH^Y2239_ARATH^Q:2181-301,H:4-634^68.671%ID^E:0^RecName: Full=Probable LRR receptor-like serine/threonine-protein kinase At2g23950;^Eukaryota; Viridiplantae; Streptophyta; Embryophyta; Tracheophyta; Spermatophyta; Magnoliopsida; eudicotyledons; Gunneridae; Pentapetalae; rosids; malvids; Brassicales; Brassicaceae; Camelineae; Arabidopsis	1.04332	1.03733	0.907123	0.361441	1.39332	1.03281	2.35904	0.52131	0.950399	0.597243	1.39517	-0.201402	0.275606	-0.112509	-2.62457	-3.90235	-5.03328
1	Nsylvestris_NODE_11120_length_1974_cov_25	TD_NICAT^TD_NICAT^Q:386-841,H:96-247^96.053%ID^E:5.24e-172^RecName: Full=Threonine dehydratase {ECO:0000305};^Eukaryota; Viridiplantae; Streptophyta; Embryophyta; Tracheophyta; Spermatophyta; Magnoliopsida; eudicotyledons; Gunneridae; Pentapetalae; asterids; lamiids; Solanales; Solanaceae; Nicotianoideae; Nicotianeae; Nicotiana`TD_NICAT^TD_NICAT^Q:1055-1396,H:334-447^97.368%ID^E:5.24e-172^RecName…	-0.964632	0.620331	-0.964632	0.035368	-0.964632	2.62033	3.3573	0.035368	-0.964632	0.620331	1.3573	-0.964632	-0.964632	0.035368	-0.964632	-0.964632	-0.964632
1	Nsylvestris_NODE_11121_length_1973_cov_209	IF2G_RAT^IF2G_RAT^Q:173-1528,H:15-465^73.673%ID^E:0^RecName: Full=Eukaryotic translation initiation factor 2 subunit 3, X-linked;^Eukaryota; Metazoa; Chordata; Craniata; Vertebrata; Euteleostomi; Mammalia; Eutheria; Euarchontoglires; Glires; Rodentia; Myomorpha; Muroidea; Muridae; Murinae; Rattus	0.418191	0.877439	0.274642	-0.186214	0.421625	1.64289	2.13181	1.83898	1.11438	1.17707	0.482656	0.565089	1.05015	0.341001	-4.4437	-4.20738	-3.49864
1	Nsylvestris_NODE_11124_length_1973_cov_167	LIIP1_ARATH^LIIP1_ARATH^Q:660-1631,H:12-342^75.904%ID^E:3.11e-128^RecName: Full=Small GTPase LIP1 {ECO:0000303|PubMed:17683937};^Eukaryota; Viridiplantae; Streptophyta; Embryophyta; Tracheophyta; Spermatophyta; Magnoliopsida; eudicotyledons; Gunneridae; Pentapetalae; rosids; malvids; Brassicales; Brassicaceae; Camelineae; Arabidopsis	-0.0759027	0.626253	-0.142826	-0.131784	0.292445	1.10721	1.73259	0.900571	0.490649	0.552998	-0.15991	0.12991	0.727405	0.267745	-2.21771	-2.33849	-1.76114
1	Nsylvestris_NODE_11126_length_1973_cov_62	SCL3_ARATH^SCL3_ARATH^Q:1608-190,H:1-482^65.217%ID^E:0^RecName: Full=Scarecrow-like protein 3 {ECO:0000303|PubMed:10341448};^Eukaryota; Viridiplantae; Streptophyta; Embryophyta; Tracheophyta; Spermatophyta; Magnoliopsida; eudicotyledons; Gunneridae; Pentapetalae; rosids; malvids; Brassicales; Brassicaceae; Camelineae; Arabidopsis	1.87579	1.56524	0.431886	-2.16568	-0.299389	1.52571	2.14586	1.60371	0.209778	0.553753	1.22992	0.536885	2.11529	1.35879	-4.22918	-4.22918	-4.22918
1	Nsylvestris_NODE_11127_length_1972_cov_209	AP4M_ARATH^AP4M_ARATH^Q:1810-452,H:1-451^86.093%ID^E:0^RecName: Full=AP-4 complex subunit mu;^Eukaryota; Viridiplantae; Streptophyta; Embryophyta; Tracheophyta; Spermatophyta; Magnoliopsida; eudicotyledons; Gunneridae; Pentapetalae; rosids; malvids; Brassicales; Brassicaceae; Camelineae; Arabidopsis	-0.0540689	0.314075	-0.632072	-0.573588	0.271754	0.51083	1.3268	0.892402	0.390454	0.404387	-0.167871	0.60583	0.465814	-0.0302976	-1.06457	-1.46578	-1.1941
1	Nsylvestris_NODE_11128_length_1972_cov_111	RCE1_ARATH^RCE1_ARATH^Q:1063-1611,H:1-184^86.413%ID^E:1.41e-112^RecName: Full=NEDD8-conjugating enzyme Ubc12;^Eukaryota; Viridiplantae; Streptophyta; Embryophyta; Tracheophyta; Spermatophyta; Magnoliopsida; eudicotyledons; Gunneridae; Pentapetalae; rosids; malvids; Brassicales; Brassicaceae; Camelineae; Arabidopsis	0.285376	0.532305	0.0115634	-0.865154	-0.0287097	0.362978	1.53773	1.50849	0.266062	0.0465394	0.17429	-0.027336	0.421109	-0.491524	-1.32793	-1.03048	-1.37531
1	Nsylvestris_NODE_11129_length_1972_cov_80	.	0.374875	0.896837	-0.162704	-0.496008	-0.0126694	0.658538	1.60134	0.99223	-0.347639	0.00963996	0.320362	-0.324264	-0.0237952	0.252949	-1.47273	-0.781977	-1.48498
1	Nsylvestris_NODE_11130_length_1972_cov_60	.	-0.412824	0.940813	-0.771278	-1.99779	-0.938893	-0.123317	0.888439	-0.133848	2.62319	3.37215	0.718107	1.81881	1.9405	1.27821	-3.58275	-2.03678	-3.58275
1	Nsylvestris_NODE_11134_length_1971_cov_126	ACR4_ARATH^ACR4_ARATH^Q:1648-323,H:1-448^73.333%ID^E:0^RecName: Full=ACT domain-containing protein ACR4 {ECO:0000305};^Eukaryota; Viridiplantae; Streptophyta; Embryophyta; Tracheophyta; Spermatophyta; Magnoliopsida; eudicotyledons; Gunneridae; Pentapetalae; rosids; malvids; Brassicales; Brassicaceae; Camelineae; Arabidopsis	1.13027	1.29139	0.713304	0.370113	0.643844	1.11026	2.38285	1.7219	0.278875	0.0176754	1.21241	0.658787	1.10078	0.610906	-4.0119	-4.50453	-4.72693
1	Nsylvestris_NODE_11135_length_1970_cov_84	.	0.852898	0.949184	0.158554	0.0602028	0.695842	2.06012	2.25097	1.83781	1.62451	1.12424	-0.224942	1.18889	1.99601	0.768475	-5.44759	-5.44759	-4.44759
1	Nsylvestris_NODE_11137_length_1971_cov_73	.	-0.635018	0.7573	0.271873	-0.38709	-0.465093	1.51473	2.11987	1.38735	0.949945	0.888544	1.00884	0.61291	0.451171	-0.547555	-3.05006	-3.05006	-1.82766
1	Nsylvestris_NODE_11138_length_1971_cov_40	COLX_ARATH^COLX_ARATH^Q:1767-721,H:3-291^34.078%ID^E:2.37e-47^RecName: Full=Putative zinc finger protein At1g68190;^Eukaryota; Viridiplantae; Streptophyta; Embryophyta; Tracheophyta; Spermatophyta; Magnoliopsida; eudicotyledons; Gunneridae; Pentapetalae; rosids; malvids; Brassicales; Brassicaceae; Camelineae; Arabidopsis	0.669337	1.298	-1.65619	-0.196761	0.0442467	-0.656193	-0.848838	-0.334265	1.51373	1.38382	1.04425	0.51293	1.43127	-0.196761	-1.33426	-1.60308	-1.07123
1	Nsylvestris_NODE_1114_length_4809_cov_126	NUP58_ARATH^NUP58_ARATH^Q:541-1599,H:94-449^66.205%ID^E:4.07e-135^RecName: Full=Nuclear pore complex protein NUP58 {ECO:0000303|PubMed:21189294};^Eukaryota; Viridiplantae; Streptophyta; Embryophyta; Tracheophyta; Spermatophyta; Magnoliopsida; eudicotyledons; Gunneridae; Pentapetalae; rosids; malvids; Brassicales; Brassicaceae; Camelineae; Arabidopsis	0.473278	0.852855	0.110763	-0.448455	0.482999	0.939849	1.87303	1.1925	0.3732	0.620341	0.209701	0.685271	0.732152	0.145183	-2.95438	-2.32136	-2.96693
1	Nsylvestris_NODE_11141_length_1970_cov_96	GLYT6_ARATH^GLYT6_ARATH^Q:1422-358,H:125-479^62.36%ID^E:2.54e-164^RecName: Full=Probable glycosyltransferase At5g25310;^Eukaryota; Viridiplantae; Streptophyta; Embryophyta; Tracheophyta; Spermatophyta; Magnoliopsida; eudicotyledons; Gunneridae; Pentapetalae; rosids; malvids; Brassicales; Brassicaceae; Camelineae; Arabidopsis	-1.61098	1.97277	0.710943	1.55894	-0.610985	1.84845	2.76336	0.710943	-0.625484	0.389015	-0.0260223	0.973978	-1.61098	-1.61098	-1.61098	-1.61098	-1.61098
1	Nsylvestris_NODE_11142_length_1970_cov_78	.	1.72456	1.23914	0.917209	1.23914	1.37664	1.61765	2.16514	1.23914	0.502172	-2.08279	0.917209	-0.441245	-2.08279	-2.08279	-2.08279	-2.08279	-2.08279
1	Nsylvestris_NODE_11148_length_1969_cov_24	.	-0.197	0.867131	0.0440084	-1.3345	0.513494	1.51349	1.86713	1.29776	2.09846	0.866503	0.250459	0.987425	1.15092	1.04401	-3.65643	-3.65643	-3.65643
1	Nsylvestris_NODE_11150_length_1968_cov_14	.	1.23046	0.851951	-0.885015	-0.885015	-2.46998	2.33738	2.69995	0.989454	1.23046	0.851951	0.698344	-1.46998	0.699947	0.530022	-2.46998	-2.46998	-1.46998
1	Nsylvestris_NODE_11151_length_1969_cov_11	.	0.0537415	1.18499	1.15328	-0.0906484	0.361864	-0.753613	0.0537415	-1.01665	1.41631	1.51941	1.01898	2.33385	0.30528	-0.168651	-2.01665	-2.01665	-3.33858
1	Nsylvestris_NODE_11157_length_1968_cov_20	.	0.348843	-0.766634	0.107835	-0.351597	-0.351597	2.48129	2.42976	0.555294	0.648403	-0.0296688	0.735866	0.107835	0.735866	0.818328	-2.3516	-1.76663	-3.3516
1	Nsylvestris_NODE_11158_length_1967_cov_215	SC61A_DICDI^SC61A_DICDI^Q:197-1609,H:2-472^72.187%ID^E:0^RecName: Full=Protein transport protein Sec61 subunit alpha;^Eukaryota; Amoebozoa; Mycetozoa; Dictyostelids; Dictyosteliales; Dictyosteliaceae; Dictyostelium	-0.390096	0.0478757	-0.0358763	-0.602026	-0.281251	0.707799	1.7268	0.926131	1.56566	1.66068	-0.00393468	1.44879	0.865885	0.140171	-2.20326	-3.50869	-2.06465
1	Nsylvestris_NODE_1116_length_4804_cov_193	.	0.742142	0.865006	-0.764722	-0.336917	-0.19324	0.183288	1.53677	0.113047	0.498523	0.469142	0.289786	0.921028	1.33948	0.44304	-1.82293	-1.80413	-2.47932
1	Nsylvestris_NODE_11162_length_1967_cov_129	PME51_ARATH^PME51_ARATH^Q:1676-150,H:40-551^63.548%ID^E:0^RecName: Full=Probable pectinesterase/pectinesterase inhibitor 51;^Eukaryota; Viridiplantae; Streptophyta; Embryophyta; Tracheophyta; Spermatophyta; Magnoliopsida; eudicotyledons; Gunneridae; Pentapetalae; rosids; malvids; Brassicales; Brassicaceae; Camelineae; Arabidopsis	0.0785165	-0.494549	-0.112743	-1.22872	0.122722	0.770746	2.03601	1.22791	1.14529	0.997663	0.21519	1.04867	1.16295	0.565783	-2.704	-1.97744	-2.85401
1	Nsylvestris_NODE_11163_length_1967_cov_108	PMS1_ARATH^PMS1_ARATH^Q:772-344,H:754-896^65.035%ID^E:2.69e-57^RecName: Full=DNA mismatch repair protein PMS1;^Eukaryota; Viridiplantae; Streptophyta; Embryophyta; Tracheophyta; Spermatophyta; Magnoliopsida; eudicotyledons; Gunneridae; Pentapetalae; rosids; malvids; Brassicales; Brassicaceae; Camelineae; Arabidopsis	0.179009	0.988684	0.147781	-0.0331233	-0.74088	1.06545	2.02698	1.3845	0.955848	1.09016	0.504185	1.07713	0.83207	0.446822	-1.88414	-4.55543	-3.48504
1	Nsylvestris_NODE_11164_length_1967_cov_99	Y3544_ARATH^Y3544_ARATH^Q:1592-597,H:131-444^59.941%ID^E:6.74e-95^RecName: Full=Uncharacterized CRM domain-containing protein At3g25440, chloroplastic;^Eukaryota; Viridiplantae; Streptophyta; Embryophyta; Tracheophyta; Spermatophyta; Magnoliopsida; eudicotyledons; Gunneridae; Pentapetalae; rosids; malvids; Brassicales; Brassicaceae; Camelineae; Arabidopsis	1.16902	1.47946	0.554064	-0.55323	0.259369	1.50056	2.3625	1.71098	1.31602	0.729123	0.694102	1.17245	1.20145	1.11531	-4.90373	-4.90373	-4.90373
1	Nsylvestris_NODE_11167_length_1966_cov_149	FOLD4_ARATH^FOLD4_ARATH^Q:1540-656,H:66-360^87.458%ID^E:1.13e-177^RecName: Full=Bifunctional protein FolD 4, chloroplastic;^Eukaryota; Viridiplantae; Streptophyta; Embryophyta; Tracheophyta; Spermatophyta; Magnoliopsida; eudicotyledons; Gunneridae; Pentapetalae; rosids; malvids; Brassicales; Brassicaceae; Camelineae; Arabidopsis	1.06513	1.24464	0.716555	-0.0623622	0.653829	1.30811	2.48117	1.73372	0.710789	0.93983	0.372019	0.475644	0.609755	0.220947	-3.34996	-3.75551	-5.36432
1	Nsylvestris_NODE_11168_length_1966_cov_93	PSUG_CLOBL^PSUG_CLOBL^Q:184-774,H:4-200^57.868%ID^E:5.18e-68^RecName: Full=Pseudouridine-5'-phosphate glycosidase {ECO:0000255|HAMAP-Rule:MF_01876};^Bacteria; Firmicutes; Clostridia; Clostridiales; Clostridiaceae; Clostridium	0.746326	1.0777	0.296054	0.375533	0.938948	1.18828	2.14862	1.03226	1.21996	1.44403	0.666193	1.08504	0.826276	0.448133	-4.50903	-3.44674	-5.5376
1	Nsylvestris_NODE_11169_length_1966_cov_54	HFA6B_ARATH^HFA6B_ARATH^Q:941-456,H:121-280^67.901%ID^E:1.72e-89^RecName: Full=Heat stress transcription factor A-6b;^Eukaryota; Viridiplantae; Streptophyta; Embryophyta; Tracheophyta; Spermatophyta; Magnoliopsida; eudicotyledons; Gunneridae; Pentapetalae; rosids; malvids; Brassicales; Brassicaceae; Camelineae; Arabidopsis`HFA6B_ARATH^HFA6B_ARATH^Q:1183-965,H:48-120^79.452%ID^E:1.72e-89^RecName: …	-0.259882	0.12441	-0.967972	-1.0139	-0.38656	0.721687	1.58075	0.780845	1.6504	1.14315	2.5718	2.04098	2.44403	1.60564	-4.4076	-3.13856	-4.48921
1	Nsylvestris_NODE_1117_length_4804_cov_122	CCC1_ARATH^CCC1_ARATH^Q:1949-4480,H:126-969^84.298%ID^E:0^RecName: Full=Cation-chloride cotransporter 1;^Eukaryota; Viridiplantae; Streptophyta; Embryophyta; Tracheophyta; Spermatophyta; Magnoliopsida; eudicotyledons; Gunneridae; Pentapetalae; rosids; malvids; Brassicales; Brassicaceae; Camelineae; Arabidopsis`CCC1_ARATH^CCC1_ARATH^Q:294-623,H:17-121^67.273%ID^E:1.18e-24^RecName: Full=Cation-chlo…	-0.7163	0.796905	-0.341663	-0.37299	0.205125	0.901597	2.15797	0.397124	0.962974	0.880432	0.437137	1.16683	0.923756	0.218434	-2.54132	-3.23237	-1.84364
1	Nsylvestris_NODE_11171_length_1965_cov_224	XXT3_ARATH^XXT3_ARATH^Q:1735-404,H:1-448^75.388%ID^E:0^RecName: Full=Probable xyloglucan 6-xylosyltransferase 3 {ECO:0000305};^Eukaryota; Viridiplantae; Streptophyta; Embryophyta; Tracheophyta; Spermatophyta; Magnoliopsida; eudicotyledons; Gunneridae; Pentapetalae; rosids; malvids; Brassicales; Brassicaceae; Camelineae; Arabidopsis	-0.480979	0.303538	0.945295	-0.044542	0.995121	1.13032	1.78693	1.20201	1.34773	0.739615	-0.608077	1.16377	1.16398	-0.146999	-2.45595	-3.25154	-3.79022
1	Nsylvestris_NODE_11173_length_1965_cov_216	Y1677_ARATH^Y1677_ARATH^Q:1734-349,H:29-505^31.4%ID^E:2.48e-53^RecName: Full=Probable LRR receptor-like serine/threonine-protein kinase At1g67720;^Eukaryota; Viridiplantae; Streptophyta; Embryophyta; Tracheophyta; Spermatophyta; Magnoliopsida; eudicotyledons; Gunneridae; Pentapetalae; rosids; malvids; Brassicales; Brassicaceae; Camelineae; Arabidopsis	-1.74602	-1.80618	0.747367	-1.50517	0.00449518	1.96532	3.18105	2.89653	0.601286	0.700422	2.11	1.37172	3.456	-1.03779	-3.83399	-4.57384	-2.5312
1	Nsylvestris_NODE_11178_length_1965_cov_138	FB345_ARATH^FB345_ARATH^Q:1528-1668,H:235-281^63.83%ID^E:6.18e-09^RecName: Full=F-box protein At4g00755;^Eukaryota; Viridiplantae; Streptophyta; Embryophyta; Tracheophyta; Spermatophyta; Magnoliopsida; eudicotyledons; Gunneridae; Pentapetalae; rosids; malvids; Brassicales; Brassicaceae; Camelineae; Arabidopsis	1.28386	0.371326	-0.0156971	-0.394209	-0.131174	1.53179	2.54125	1.23806	1.06522	0.676181	1.89857	0.531791	1.09764	0.868826	-4.71614	-3.13117	-4.71614
1	Nsylvestris_NODE_1118_length_4803_cov_215	BGA13_ARATH^BGA13_ARATH^Q:2684-288,H:44-843^59.278%ID^E:0^RecName: Full=Beta-galactosidase 13;^Eukaryota; Viridiplantae; Streptophyta; Embryophyta; Tracheophyta; Spermatophyta; Magnoliopsida; eudicotyledons; Gunneridae; Pentapetalae; rosids; malvids; Brassicales; Brassicaceae; Camelineae; Arabidopsis	0.894255	-0.287624	1.1157	-0.68998	0.646141	0.0547567	0.767469	-0.0877655	0.182924	0.13355	1.93529	-0.582901	3.88546	-0.13446	-2.78128	-2.55204	-2.49949
1	Nsylvestris_NODE_11183_length_1964_cov_195	TBD2A_HUMAN^TBD2A_HUMAN^Q:804-1628,H:618-893^39.711%ID^E:2.52e-53^RecName: Full=TBC1 domain family member 2A;^Eukaryota; Metazoa; Chordata; Craniata; Vertebrata; Euteleostomi; Mammalia; Eutheria; Euarchontoglires; Primates; Haplorrhini; Catarrhini; Hominidae; Homo	0.937976	0.983295	0.412131	-0.724713	0.759073	0.538455	2.18312	1.00616	0.926741	0.659548	1.45613	0.486535	1.84893	0.0190813	-4.279	-2.94858	-4.26488
1	Nsylvestris_NODE_11188_length_1964_cov_113	BBX19_ARATH^BBX19_ARATH^Q:1463-1915,H:32-156^57.237%ID^E:5.19e-46^RecName: Full=B-box zinc finger protein 19 {ECO:0000303|PubMed:19920209};^Eukaryota; Viridiplantae; Streptophyta; Embryophyta; Tracheophyta; Spermatophyta; Magnoliopsida; eudicotyledons; Gunneridae; Pentapetalae; rosids; malvids; Brassicales; Brassicaceae; Camelineae; Arabidopsis`BBX19_ARATH^BBX19_ARATH^Q:359-454,H:1-32^81.25%ID^E:…	2.25759	-0.0664965	-0.487586	-1.47036	-0.279897	1.30924	3.64685	4.00836	0.108362	0.530262	0.680973	0.502455	2.22264	0.533526	-3.52946	-5.00455	-4.9619
1	Nsylvestris_NODE_11189_length_1964_cov_106	RD19B_ARATH^RD19B_ARATH^Q:875-402,H:190-348^78.616%ID^E:2.07e-87^RecName: Full=Probable cysteine protease RD19B {ECO:0000305};^Eukaryota; Viridiplantae; Streptophyta; Embryophyta; Tracheophyta; Spermatophyta; Magnoliopsida; eudicotyledons; Gunneridae; Pentapetalae; rosids; malvids; Brassicales; Brassicaceae; Camelineae; Arabidopsis	0.469143	0.71626	0.939194	0.198197	0.897948	0.406375	1.50159	1.00925	1.03956	1.62556	1.33886	0.618748	1.55668	1.23059	-4.4298	-3.95581	-5.16234
1	Nsylvestris_NODE_1119_length_4801_cov_198	RHB1A_ARATH^RHB1A_ARATH^Q:3605-4243,H:1-190^36.744%ID^E:1.7e-23^RecName: Full=Probable E3 ubiquitin-protein ligase RHB1A {ECO:0000305};^Eukaryota; Viridiplantae; Streptophyta; Embryophyta; Tracheophyta; Spermatophyta; Magnoliopsida; eudicotyledons; Gunneridae; Pentapetalae; rosids; malvids; Brassicales; Brassicaceae; Camelineae; Arabidopsis	0.507365	0.972837	1.15265	-0.00915886	1.05637	0.145077	1.56998	1.14672	1.48695	1.36166	0.601388	1.35382	1.21632	-0.261076	-4.49441	-3.40848	-4.39799
1	Nsylvestris_NODE_11190_length_1964_cov_95	Y5713_ARATH^Y5713_ARATH^Q:1667-675,H:39-369^56.495%ID^E:3.07e-136^RecName: Full=PI-PLC X domain-containing protein At5g67130;^Eukaryota; Viridiplantae; Streptophyta; Embryophyta; Tracheophyta; Spermatophyta; Magnoliopsida; eudicotyledons; Gunneridae; Pentapetalae; rosids; malvids; Brassicales; Brassicaceae; Camelineae; Arabidopsis	-0.8054	0.544654	0.324883	0.0660728	0.860595	1.9769	2.33775	0.65982	1.33892	0.228165	0.429143	-0.500447	0.993108	-0.0837447	-1.66435	-4.61481	-2.09125
1	Nsylvestris_NODE_11193_length_1963_cov_184	Y2837_ARATH^Y2837_ARATH^Q:1864-362,H:25-502^33.786%ID^E:1.35e-47^RecName: Full=WEB family protein At2g38370;^Eukaryota; Viridiplantae; Streptophyta; Embryophyta; Tracheophyta; Spermatophyta; Magnoliopsida; eudicotyledons; Gunneridae; Pentapetalae; rosids; malvids; Brassicales; Brassicaceae; Camelineae; Arabidopsis	-0.882118	1.35429	2.04071	0.471519	1.55054	1.85485	2.35735	1.34027	0.931635	1.9906	-0.882118	1.79068	-0.351603	-2.46708	-4.05204	-2.99546	-4.05204
1	Nsylvestris_NODE_11194_length_1963_cov_184	RNGB_DICDI^RNGB_DICDI^Q:527-312,H:870-942^38.356%ID^E:1.64e-08^RecName: Full=RING finger protein B;^Eukaryota; Amoebozoa; Mycetozoa; Dictyostelids; Dictyosteliales; Dictyosteliaceae; Dictyostelium	0.518948	-0.122394	-0.240444	-0.755855	0.279468	-0.670628	0.521799	0.141965	0.861942	0.579622	1.32576	0.18268	1.23288	0.309947	-1.4001	-0.84591	-1.91969
1	Nsylvestris_NODE_11196_length_1963_cov_143	AHL1_ARATH^AHL1_ARATH^Q:879-1556,H:130-354^64.224%ID^E:1.42e-77^RecName: Full=AT-hook motif nuclear-localized protein 1 {ECO:0000303|PubMed:15604740};^Eukaryota; Viridiplantae; Streptophyta; Embryophyta; Tracheophyta; Spermatophyta; Magnoliopsida; eudicotyledons; Gunneridae; Pentapetalae; rosids; malvids; Brassicales; Brassicaceae; Camelineae; Arabidopsis	0.982996	1.31954	0.187784	-0.687123	0.0817087	1.35422	1.77769	0.966617	0.687273	1.01562	0.187638	1.22347	1.31967	0.728216	-3.27209	-3.44201	-4.43123
1	Nsylvestris_NODE_11197_length_1963_cov_118	PILS1_ARATH^PILS1_ARATH^Q:1394-132,H:86-472^58.432%ID^E:1.33e-159^RecName: Full=Protein PIN-LIKES 1 {ECO:0000303|PubMed:22504182};^Eukaryota; Viridiplantae; Streptophyta; Embryophyta; Tracheophyta; Spermatophyta; Magnoliopsida; eudicotyledons; Gunneridae; Pentapetalae; rosids; malvids; Brassicales; Brassicaceae; Camelineae; Arabidopsis	0.344858	1.07751	0.126128	-0.0404049	0.334719	0.26951	2.0997	1.36138	0.253095	0.341036	-0.172669	1.25954	0.0283079	0.274233	-2.12867	-2.13743	-3.29083
1	Nsylvestris_NODE_11199_length_1963_cov_97	ATL46_ARATH^ATL46_ARATH^Q:1143-172,H:39-371^60.694%ID^E:9.83e-103^RecName: Full=RING-H2 finger protein ATL46;^Eukaryota; Viridiplantae; Streptophyta; Embryophyta; Tracheophyta; Spermatophyta; Magnoliopsida; eudicotyledons; Gunneridae; Pentapetalae; rosids; malvids; Brassicales; Brassicaceae; Camelineae; Arabidopsis	1.14586	1.38177	1.14701	0.449593	0.365044	1.79246	1.91394	0.888348	0.788222	1.50295	1.05494	-0.0806622	1.05709	0.09606	-4.50088	-4.50088	-4.50088
1	Nsylvestris_NODE_112_length_8276_cov_92	ERDL6_ARATH^ERDL6_ARATH^Q:1771-362,H:14-483^82.766%ID^E:0^RecName: Full=Sugar transporter ERD6-like 6;^Eukaryota; Viridiplantae; Streptophyta; Embryophyta; Tracheophyta; Spermatophyta; Magnoliopsida; eudicotyledons; Gunneridae; Pentapetalae; rosids; malvids; Brassicales; Brassicaceae; Camelineae; Arabidopsis	0.0226181	0.483685	0.09162	-0.135776	0.360937	1.51883	2.26347	1.23945	0.751062	0.696522	0.528055	0.943433	0.913753	0.270224	-3.42996	-2.84443	-3.6735
1	Nsylvestris_NODE_11200_length_1963_cov_55	BL1S1_ARATH^BL1S1_ARATH^Q:97-354,H:36-121^54.651%ID^E:4.13e-23^RecName: Full=Biogenesis of lysosome-related organelles complex 1 subunit 1;^Eukaryota; Viridiplantae; Streptophyta; Embryophyta; Tracheophyta; Spermatophyta; Magnoliopsida; eudicotyledons; Gunneridae; Pentapetalae; rosids; malvids; Brassicales; Brassicaceae; Camelineae; Arabidopsis	0.715841	0.30481	0.989644	-0.523587	0.926342	0.822136	2.13021	1.99351	0.382672	0.23562	0.412677	-0.681918	1.64388	0.289618	-3.71578	-3.71578	-2.20989
1	Nsylvestris_NODE_11201_length_1962_cov_220	UKL1_ARATH^UKL1_ARATH^Q:187-1638,H:1-485^86.804%ID^E:0^RecName: Full=Uridine kinase-like protein 1, chloroplastic;^Eukaryota; Viridiplantae; Streptophyta; Embryophyta; Tracheophyta; Spermatophyta; Magnoliopsida; eudicotyledons; Gunneridae; Pentapetalae; rosids; malvids; Brassicales; Brassicaceae; Camelineae; Arabidopsis	0.331909	0.529994	0.130321	-0.568181	0.307604	0.451558	1.25981	0.920594	-0.523851	-0.710026	-0.569135	0.100953	0.979899	0.479405	-0.917058	-0.970509	-1.23329
1	Nsylvestris_NODE_11203_length_1962_cov_113	GGLO6_ARATH^GGLO6_ARATH^Q:122-1837,H:18-590^62.153%ID^E:0^RecName: Full=Probable L-gulonolactone oxidase 6 {ECO:0000303|PubMed:20622436};^Eukaryota; Viridiplantae; Streptophyta; Embryophyta; Tracheophyta; Spermatophyta; Magnoliopsida; eudicotyledons; Gunneridae; Pentapetalae; rosids; malvids; Brassicales; Brassicaceae; Camelineae; Arabidopsis	-1.15773	-0.435123	0.703691	-1.75705	0.0503035	1.24295	3.12559	1.41287	1.03892	1.16895	1.56488	0.242949	1.24205	-1.17209	-2.75705	-1.75705	-2.75705
1	Nsylvestris_NODE_11204_length_1962_cov_67	.	1.12527	0.649738	0.711139	0.518494	0.213639	1.08037	0.984157	0.711139	-0.0664688	-0.173384	0.825506	0.126176	0.445216	-0.173384	-1.5519	-3.87382	-1.5519
1	Nsylvestris_NODE_11206_length_1962_cov_15	.	0.548701	0.548701	0.226773	-0.358189	-1.03626	0.101242	0.641811	0.729274	1.10124	1.3967	0.548701	0.641811	1.34225	-0.358189	-1.35819	-2.35819	-2.35819
1	Nsylvestris_NODE_11207_length_1962_cov_14	.	-0.243057	0.493909	-0.243057	0.171981	-0.412982	0.0464497	0.674481	0.493909	0.287458	-0.828019	1.23087	0.171981	1.54121	1.04645	-0.605627	-2.41298	-1.41298
1	Nsylvestris_NODE_1121_length_4799_cov_231	TOP2_ARATH^TOP2_ARATH^Q:119-3937,H:4-1325^64.254%ID^E:0^RecName: Full=DNA topoisomerase 2;^Eukaryota; Viridiplantae; Streptophyta; Embryophyta; Tracheophyta; Spermatophyta; Magnoliopsida; eudicotyledons; Gunneridae; Pentapetalae; rosids; malvids; Brassicales; Brassicaceae; Camelineae; Arabidopsis`TOP2_ARATH^TOP2_ARATH^Q:4232-4462,H:1383-1456^46.753%ID^E:2.04e-06^RecName: Full=DNA topoisomerase 2;…	-1.61734	1.97623	0.546105	0.749183	0.0288477	2.51102	2.02523	0.789999	-2.77438	-0.368387	1.21385	0.854394	1.12962	0.134434	-1.65005	-2.77438	-2.77438
1	Nsylvestris_NODE_11213_length_1961_cov_164	TLC4B_XENLA^TLC4B_XENLA^Q:1271-642,H:41-248^29.767%ID^E:5.31e-17^RecName: Full=TLC domain-containing protein 4-B {ECO:0000305};^Eukaryota; Metazoa; Chordata; Craniata; Vertebrata; Euteleostomi; Amphibia; Batrachia; Anura; Pipoidea; Pipidae; Xenopodinae; Xenopus; Xenopus	0.212592	0.987211	0.121731	0.182226	1.23981	0.768336	2.06412	1.08182	1.13043	1.17573	-0.27573	0.837387	1.60477	0.132812	-3.25959	-3.51871	-4.48496
1	Nsylvestris_NODE_11214_length_1961_cov_66	NFRKB_MOUSE^NFRKB_MOUSE^Q:568-101,H:503-659^50.633%ID^E:4.74e-42^RecName: Full=Nuclear factor related to kappa-B-binding protein;^Eukaryota; Metazoa; Chordata; Craniata; Vertebrata; Euteleostomi; Mammalia; Eutheria; Euarchontoglires; Glires; Rodentia; Myomorpha; Muroidea; Muridae; Murinae; Mus; Mus	1.52888	1.31852	1.35485	0.31738	0.391381	0.593014	1.92743	1.74188	-0.0236569	1.23938	0.0694525	0.927434	0.876807	-0.471116	-3.93055	-3.93055	-3.93055
1	Nsylvestris_NODE_11215_length_1961_cov_38	MYBF_ARATH^MYBF_ARATH^Q:1243-1031,H:15-85^69.014%ID^E:4.3e-26^RecName: Full=Putative Myb family transcription factor At1g14600;^Eukaryota; Viridiplantae; Streptophyta; Embryophyta; Tracheophyta; Spermatophyta; Magnoliopsida; eudicotyledons; Gunneridae; Pentapetalae; rosids; malvids; Brassicales; Brassicaceae; Camelineae; Arabidopsis	0.116015	0.625028	0.663503	-0.336497	0.273556	0.0594312	1.41558	0.503038	0.170463	0.322466	0.273556	-0.262497	0.459969	-0.192108	-1.4145	-1.2625	-1.4145
1	Nsylvestris_NODE_11219_length_1960_cov_212	DTX24_ARATH^DTX24_ARATH^Q:268-1647,H:30-490^56.182%ID^E:0^RecName: Full=Protein DETOXIFICATION 24 {ECO:0000303|PubMed:11739388};^Eukaryota; Viridiplantae; Streptophyta; Embryophyta; Tracheophyta; Spermatophyta; Magnoliopsida; eudicotyledons; Gunneridae; Pentapetalae; rosids; malvids; Brassicales; Brassicaceae; Camelineae; Arabidopsis	-0.131123	0.297726	0.492967	0.0509673	0.397156	1.37914	2.43147	1.88386	1.11341	1.02571	0.260487	1.11487	1.39619	0.460209	-4.56137	-3.99352	-3.61814
1	Nsylvestris_NODE_11221_length_1960_cov_188	PIGA_ARATH^PIGA_ARATH^Q:1681-359,H:1-441^81.179%ID^E:0^RecName: Full=Phosphatidylinositol N-acetylglucosaminyltransferase subunit A;^Eukaryota; Viridiplantae; Streptophyta; Embryophyta; Tracheophyta; Spermatophyta; Magnoliopsida; eudicotyledons; Gunneridae; Pentapetalae; rosids; malvids; Brassicales; Brassicaceae; Camelineae; Arabidopsis	0.0595414	0.919762	0.757571	0.0276244	0.154522	1.22455	1.8585	1.5254	0.400128	0.175163	0.608661	0.185986	0.792113	0.263976	-3.18758	-2.60601	-3.15991
1	Nsylvestris_NODE_11223_length_1960_cov_93	FB152_ARATH^FB152_ARATH^Q:1697-801,H:12-311^25.714%ID^E:1.34e-11^RecName: Full=Putative F-box protein At3g17480;^Eukaryota; Viridiplantae; Streptophyta; Embryophyta; Tracheophyta; Spermatophyta; Magnoliopsida; eudicotyledons; Gunneridae; Pentapetalae; rosids; malvids; Brassicales; Brassicaceae; Camelineae; Arabidopsis	0.940131	1.25329	0.753718	0.419299	0.849934	1.4193	2.16252	1.72863	-0.782335	0.753718	0.143665	0.4807	0.539593	0.0656623	-2.5193	-4.10426	-4.10426
1	Nsylvestris_NODE_11225_length_1959_cov_223	APA1_ARATH^APA1_ARATH^Q:309-1769,H:22-506^74.438%ID^E:0^RecName: Full=Aspartic proteinase A1;^Eukaryota; Viridiplantae; Streptophyta; Embryophyta; Tracheophyta; Spermatophyta; Magnoliopsida; eudicotyledons; Gunneridae; Pentapetalae; rosids; malvids; Brassicales; Brassicaceae; Camelineae; Arabidopsis	1.00008	0.903576	0.000918814	-0.201992	1.20198	0.400197	1.3573	0.943992	0.58885	0.640825	0.437969	0.4033	0.968537	0.101955	-2.89068	-2.62364	-3.23317
1	Nsylvestris_NODE_11226_length_1959_cov_215	CSN4_ARATH^CSN4_ARATH^Q:153-1307,H:13-397^84.156%ID^E:0^RecName: Full=COP9 signalosome complex subunit 4;^Eukaryota; Viridiplantae; Streptophyta; Embryophyta; Tracheophyta; Spermatophyta; Magnoliopsida; eudicotyledons; Gunneridae; Pentapetalae; rosids; malvids; Brassicales; Brassicaceae; Camelineae; Arabidopsis	-0.0443333	0.800798	0.452293	-0.298305	0.0194647	0.5365	1.51322	0.835718	0.547467	0.732736	0.566421	0.812852	0.704323	0.0779574	-2.00954	-1.99029	-3.25728
1	Nsylvestris_NODE_11227_length_1961_cov_191	EA6_ARATH^EA6_ARATH^Q:1725-397,H:37-478^54.402%ID^E:0^RecName: Full=Probable glucan endo-1,3-beta-glucosidase A6;^Eukaryota; Viridiplantae; Streptophyta; Embryophyta; Tracheophyta; Spermatophyta; Magnoliopsida; eudicotyledons; Gunneridae; Pentapetalae; rosids; malvids; Brassicales; Brassicaceae; Camelineae; Arabidopsis	0.558798	0.419347	0.729239	0.0489249	0.792677	1.51045	2.34512	1.17418	1.20418	0.890996	-0.337323	0.138073	0.910019	-0.70738	-2.74839	-3.99878	-2.93013
1	Nsylvestris_NODE_11229_length_1959_cov_182	RBCMT_TOBAC^RBCMT_TOBAC^Q:1611-418,H:57-448^27.404%ID^E:2.65e-26^RecName: Full=Ribulose-1,5 bisphosphate carboxylase/oxygenase large subunit N-methyltransferase, chloroplastic;^Eukaryota; Viridiplantae; Streptophyta; Embryophyta; Tracheophyta; Spermatophyta; Magnoliopsida; eudicotyledons; Gunneridae; Pentapetalae; asterids; lamiids; Solanales; Solanaceae; Nicotianoideae; Nicotianeae; Nicotiana	0.754792	0.664918	0.263272	-0.856103	0.301538	1.25266	1.70602	1.35957	0.159607	0.502313	0.61503	-0.214508	-0.447061	-0.340764	-1.83992	-2.70621	-1.17516
1	Nsylvestris_NODE_11231_length_1959_cov_37	VTI12_ARATH^VTI12_ARATH^Q:1777-1679,H:1-33^75.758%ID^E:1.77e-08^RecName: Full=Vesicle transport v-SNARE 12;^Eukaryota; Viridiplantae; Streptophyta; Embryophyta; Tracheophyta; Spermatophyta; Magnoliopsida; eudicotyledons; Gunneridae; Pentapetalae; rosids; malvids; Brassicales; Brassicaceae; Camelineae; Arabidopsis	1.21274	1.11869	-0.843281	-0.0849322	1.02822	1.11421	1.693	1.08935	0.168098	1.59984	0.407735	0.35892	1.39672	0.0611413	-2.8763	-2.87185	-4.57229
1	Nsylvestris_NODE_11232_length_1959_cov_23	.	0.413365	1.15033	-0.171597	0.635757	0.635757	0.915865	1.91587	1.15033	0.287834	1.7826	-0.364243	1.52884	-0.364243	-0.00167245	-3.1716	-3.1716	-3.1716
1	Nsylvestris_NODE_11235_length_1958_cov_106	ASPG2_ARATH^ASPG2_ARATH^Q:1520-297,H:58-470^70.773%ID^E:0^RecName: Full=Protein ASPARTIC PROTEASE IN GUARD CELL 2;^Eukaryota; Viridiplantae; Streptophyta; Embryophyta; Tracheophyta; Spermatophyta; Magnoliopsida; eudicotyledons; Gunneridae; Pentapetalae; rosids; malvids; Brassicales; Brassicaceae; Camelineae; Arabidopsis	-0.309311	0.583774	0.970797	0.690689	1.58765	2.58377	3.32628	1.69069	-1.11667	-2.11667	-3.11667	0.583774	-1.11667	-3.11667	1.27565	-3.11667	0.716224
1	Nsylvestris_NODE_11236_length_1958_cov_87	MYB35_ARATH^MYB35_ARATH^Q:604-1038,H:1-145^58.904%ID^E:5.87e-46^RecName: Full=Transcription factor MYB35 {ECO:0000303|PubMed:9839469};^Eukaryota; Viridiplantae; Streptophyta; Embryophyta; Tracheophyta; Spermatophyta; Magnoliopsida; eudicotyledons; Gunneridae; Pentapetalae; rosids; malvids; Brassicales; Brassicaceae; Camelineae; Arabidopsis	-0.383838	1.56369	1.7937	0.616162	0.393769	1.10649	0.747406	-2.19119	0.178041	0.311307	0.471772	0.715697	0.353127	0.353127	-2.45423	-0.383838	-3.19119
1	Nsylvestris_NODE_11237_length_1958_cov_61	.	1.0734	0.321327	1.0734	-0.226161	0.395328	0.465717	1.71726	1.28285	0.828287	1.11779	1.0276	-0.341638	1.80132	1.24332	-3.9266	-3.9266	-3.9266
1	Nsylvestris_NODE_1124_length_4787_cov_79	RENT3_ARATH^RENT3_ARATH^Q:3592-4080,H:303-482^36.082%ID^E:4.41e-08^RecName: Full=Regulator of nonsense transcripts UPF3 {ECO:0000305};^Eukaryota; Viridiplantae; Streptophyta; Embryophyta; Tracheophyta; Spermatophyta; Magnoliopsida; eudicotyledons; Gunneridae; Pentapetalae; rosids; malvids; Brassicales; Brassicaceae; Camelineae; Arabidopsis	0.702111	0.594486	0.224345	-0.32292	0.881311	1.22713	2.19129	1.46991	1.04089	1.07406	1.07479	0.927532	1.4756	0.509582	-4.29219	-4.11721	-4.66072
1	Nsylvestris_NODE_11245_length_1957_cov_78	AP21_ORYSI^AP21_ORYSI^Q:703-1485,H:171-456^58.681%ID^E:1.26e-94^RecName: Full=APETALA2-like protein 1 {ECO:0000305};^Eukaryota; Viridiplantae; Streptophyta; Embryophyta; Tracheophyta; Spermatophyta; Magnoliopsida; Liliopsida; Poales; Poaceae; BOP clade; Oryzoideae; Oryzeae; Oryzinae; Oryza; Oryza sativa	-0.0677319	1.96354	1.24293	1.07551	1.95115	1.99754	2.40833	0.716196	-0.848692	0.356863	-0.50496	0.400135	1.29108	0.204037	-4.41185	-4.41185	-3.36222
1	Nsylvestris_NODE_11247_length_1957_cov_57	SNAK2_SOLTU^SNAK2_SOLTU^Q:1038-1169,H:1-44^84.091%ID^E:6.5e-07^RecName: Full=Snakin-2;^Eukaryota; Viridiplantae; Streptophyta; Embryophyta; Tracheophyta; Spermatophyta; Magnoliopsida; eudicotyledons; Gunneridae; Pentapetalae; asterids; lamiids; Solanales; Solanaceae; Solanoideae; Solaneae; Solanum	0.223522	0.0170708	0.7722	0.644675	-0.24292	0.473928	2.17477	1.84408	0.266868	-0.281653	0.285053	0.288062	2.04366	-0.534552	-2.70235	-2.57007	-2.70235
1	Nsylvestris_NODE_1125_length_4786_cov_219	SC31B_ARATH^SC31B_ARATH^Q:982-4362,H:1-1104^62.511%ID^E:0^RecName: Full=Protein transport protein SEC31 homolog B {ECO:0000305};^Eukaryota; Viridiplantae; Streptophyta; Embryophyta; Tracheophyta; Spermatophyta; Magnoliopsida; eudicotyledons; Gunneridae; Pentapetalae; rosids; malvids; Brassicales; Brassicaceae; Camelineae; Arabidopsis	1.65196	1.89735	0.411127	0.5574	0.822161	1.70097	2.68954	2.21632	-0.773838	-0.206401	-0.200681	-0.303125	-0.396886	0.206845	-3.33127	-3.73498	-3.20649
1	Nsylvestris_NODE_11250_length_1957_cov_20	MOT1_ARATH^MOT1_ARATH^Q:72-1373,H:3-441^68.254%ID^E:1.42e-165^RecName: Full=Molybdate transporter 1;^Eukaryota; Viridiplantae; Streptophyta; Embryophyta; Tracheophyta; Spermatophyta; Magnoliopsida; eudicotyledons; Gunneridae; Pentapetalae; rosids; malvids; Brassicales; Brassicaceae; Camelineae; Arabidopsis	-1.45698	-0.872014	-0.234584	-0.872014	-1.04194	-2.04194	0.712948	0.816042	1.34728	1.79146	2.2418	0.65961	2.04127	1.27999	-2.45698	-0.456977	-1.45698
1	Nsylvestris_NODE_11251_length_1957_cov_15	.	1.18924	0.537167	0.0517401	-0.685225	-0.100263	1.12213	1.68401	0.0517401	0.899737	1.12213	0.636703	1.26773	0.718951	-0.270188	-3.27019	-1.68523	-3.27019
1	Nsylvestris_NODE_11255_length_1956_cov_218	TM87A_XENTR^TM87A_XENTR^Q:1259-438,H:197-467^34.058%ID^E:2.97e-44^RecName: Full=Transmembrane protein 87A {ECO:0000305};^Eukaryota; Metazoa; Chordata; Craniata; Vertebrata; Euteleostomi; Amphibia; Batrachia; Anura; Pipoidea; Pipidae; Xenopodinae; Xenopus; Silurana	0.0799282	0.855758	1.17334	0.679361	1.44876	1.61788	2.33709	2.1118	-0.223702	0.0202818	-0.564902	-0.161093	-0.478925	-0.7385	-2.36387	-3.33336	-2.45985
1	Nsylvestris_NODE_11256_length_1956_cov_203	CSK21_ARATH^CSK21_ARATH^Q:1603-599,H:75-409^94.03%ID^E:0^RecName: Full=Casein kinase II subunit alpha-1;^Eukaryota; Viridiplantae; Streptophyta; Embryophyta; Tracheophyta; Spermatophyta; Magnoliopsida; eudicotyledons; Gunneridae; Pentapetalae; rosids; malvids; Brassicales; Brassicaceae; Camelineae; Arabidopsis	0.315162	0.589531	-0.412331	-0.587422	0.364011	1.10455	1.74394	1.39487	0.701563	0.676641	0.218691	0.473101	0.72234	0.427419	-2.42756	-2.89792	-2.4066
1	Nsylvestris_NODE_11258_length_1956_cov_114	MRM1_DICDI^MRM1_DICDI^Q:913-200,H:284-526^33.083%ID^E:1.5e-38^RecName: Full=rRNA methyltransferase 1, mitochondrial {ECO:0000250|UniProtKB:P25270};^Eukaryota; Amoebozoa; Mycetozoa; Dictyostelids; Dictyosteliales; Dictyosteliaceae; Dictyostelium	0.583551	1.44358	0.988851	0.26811	0.332368	2.06886	2.19028	0.343581	1.01903	0.969379	0.481085	0.802505	1.08663	-0.359275	-4.07456	-5.61062	-2.53337
1	Nsylvestris_NODE_1126_length_4786_cov_83	.	1.06775	1.00311	1.00489	0.187656	0.59933	0.387439	1.30439	-0.136714	1.07125	1.56105	1.98252	1.14715	1.61063	1.12068	-4.51961	-6.10457	-3.28695
1	Nsylvestris_NODE_11262_length_1955_cov_223	TBC15_MOUSE^TBC15_MOUSE^Q:833-1264,H:394-537^45.89%ID^E:2.66e-31^RecName: Full=TBC1 domain family member 15;^Eukaryota; Metazoa; Chordata; Craniata; Vertebrata; Euteleostomi; Mammalia; Eutheria; Euarchontoglires; Glires; Rodentia; Myomorpha; Muroidea; Muridae; Murinae; Mus; Mus	0.653518	0.256699	0.389265	-0.670594	0.672215	1.16363	1.77081	1.49467	0.546064	0.280913	0.733619	0.0530168	2.45056	0.446633	-3.25328	-2.48823	-4.49951
1	Nsylvestris_NODE_11264_length_1955_cov_207	.	0.0900542	1.41198	0.375456	0.411982	0.73391	1.17752	2.55766	0.549486	1.06733	0.790494	1.51632	1.51632	1.65991	0.871414	-4.90995	-4.90995	-4.90995
1	Nsylvestris_NODE_1127_length_4785_cov_183	DEF1B_SOLLC^DEF1B_SOLLC^Q:2706-3491,H:18-279^85.878%ID^E:8.5e-152^RecName: Full=Peptide deformylase 1B, chloroplastic;^Eukaryota; Viridiplantae; Streptophyta; Embryophyta; Tracheophyta; Spermatophyta; Magnoliopsida; eudicotyledons; Gunneridae; Pentapetalae; asterids; lamiids; Solanales; Solanaceae; Solanoideae; Solaneae; Solanum; Lycopersicon	1.20906	0.910019	-0.138864	0.119697	0.316652	1.39644	1.88569	0.71658	0.938731	0.737532	0.861159	0.649398	1.48631	0.580446	-3.91374	-3.35521	-4.3999
1	Nsylvestris_NODE_11270_length_1955_cov_54	KCO5_ARATH^KCO5_ARATH^Q:257-1240,H:78-404^66.061%ID^E:3.88e-136^RecName: Full=Two-pore potassium channel 5;^Eukaryota; Viridiplantae; Streptophyta; Embryophyta; Tracheophyta; Spermatophyta; Magnoliopsida; eudicotyledons; Gunneridae; Pentapetalae; rosids; malvids; Brassicales; Brassicaceae; Camelineae; Arabidopsis	1.2611	1.22222	0.474024	-1.40351	0.18306	1.76882	2.37149	1.18386	1.01349	0.261105	-0.285624	1.37149	1.56853	0.968133	-3.98606	-3.98606	-3.98606
1	Nsylvestris_NODE_11271_length_1955_cov_41	.	-1.08267	0.405648	1.01783	0.0603455	-0.220604	0.100369	1.79246	0.234048	1.28255	1.69843	1.99781	1.21006	0.338141	1.37071	-3.40171	-3.40171	-3.40171
1	Nsylvestris_NODE_11273_length_1954_cov_219	PUX10_ARATH^PUX10_ARATH^Q:1721-333,H:1-480^69.023%ID^E:0^RecName: Full=Plant UBX domain-containing protein 10 {ECO:0000303|Ref.4};^Eukaryota; Viridiplantae; Streptophyta; Embryophyta; Tracheophyta; Spermatophyta; Magnoliopsida; eudicotyledons; Gunneridae; Pentapetalae; rosids; malvids; Brassicales; Brassicaceae; Camelineae; Arabidopsis	0.136014	0.238923	-0.324889	-0.585936	-0.0242782	1.40496	2.34022	1.33653	1.28079	1.41969	0.617942	0.91948	1.32895	0.836856	-3.65642	-3.49425	-3.7746
1	Nsylvestris_NODE_11275_length_1954_cov_161	BSDC1_CHICK^BSDC1_CHICK^Q:447-1088,H:18-211^27.442%ID^E:8.88e-18^RecName: Full=BSD domain-containing protein 1;^Eukaryota; Metazoa; Chordata; Craniata; Vertebrata; Euteleostomi; Archelosauria; Archosauria; Dinosauria; Saurischia; Theropoda; Coelurosauria; Aves; Neognathae; Galloanserae; Galliformes; Phasianidae; Phasianinae; Gallus	0.974895	0.497304	0.35364	-0.0696592	0.775878	1.45773	2.39943	1.15672	1.28201	0.990664	0.707834	0.742009	1.91346	0.810488	-5.85792	-3.91463	-4.21985
1	Nsylvestris_NODE_11277_length_1954_cov_112	.	0.33802	0.523052	0.26581	-0.301914	0.755184	1.2614	1.9803	1.34194	0.847833	0.684868	0.510794	0.554829	1.21553	0.135542	-4.11827	-2.26486	-3.73007
1	Nsylvestris_NODE_11278_length_1954_cov_80	.	1.34036	1.60534	1.05859	-0.659635	1.15435	-0.659635	0.293059	0.0306016	0.473631	-0.613832	0.652955	0.141056	-0.187902	-0.969975	-1.80236	-0.114623	-1.74199
1	Nsylvestris_NODE_11279_length_1954_cov_78	GC1_ARATH^GC1_ARATH^Q:791-420,H:224-347^82.258%ID^E:6.19e-66^RecName: Full=Epimerase family protein SDR39U1 homolog, chloroplastic {ECO:0000305};^Eukaryota; Viridiplantae; Streptophyta; Embryophyta; Tracheophyta; Spermatophyta; Magnoliopsida; eudicotyledons; Gunneridae; Pentapetalae; rosids; malvids; Brassicales; Brassicaceae; Camelineae; Arabidopsis	0.290412	-0.32395	-0.494219	-1.52803	-0.214366	0.626676	2.69191	2.40502	-1.24632	-0.669026	-0.497937	-0.865969	-0.0696966	-0.39324	0.331673	-0.348356	0.305423
1	Nsylvestris_NODE_11280_length_1954_cov_54	FBL77_ARATH^FBL77_ARATH^Q:1378-521,H:159-446^42.662%ID^E:1.18e-102^RecName: Full=F-box/LRR-repeat protein At4g29420;^Eukaryota; Viridiplantae; Streptophyta; Embryophyta; Tracheophyta; Spermatophyta; Magnoliopsida; eudicotyledons; Gunneridae; Pentapetalae; rosids; malvids; Brassicales; Brassicaceae; Camelineae; Arabidopsis`FBL77_ARATH^FBL77_ARATH^Q:1853-1356,H:1-167^52.353%ID^E:1.18e-102^RecName: …	0.595762	1.3791	0.885269	-0.404238	0.425837	1.06969	1.98043	1.0108	0.673005	1.02396	-0.216611	1.30211	0.987774	0.00959684	-3.57416	-3.57416	-3.57416
1	Nsylvestris_NODE_11281_length_1954_cov_39	PP160_ARATH^PP160_ARATH^Q:251-1906,H:40-591^60.326%ID^E:0^RecName: Full=Pentatricopeptide repeat-containing protein At2g17525, mitochondrial;^Eukaryota; Viridiplantae; Streptophyta; Embryophyta; Tracheophyta; Spermatophyta; Magnoliopsida; eudicotyledons; Gunneridae; Pentapetalae; rosids; malvids; Brassicales; Brassicaceae; Camelineae; Arabidopsis	-1.069	0.669264	-0.0630455	-0.802175	-0.200765	1.26309	1.50251	-0.341841	0.83767	1.11186	0.0611785	1.06415	0.20098	0.121876	-1.42137	-1.89438	-1.03999
1	Nsylvestris_NODE_11283_length_1953_cov_231	XYN1_ARATH^XYN1_ARATH^Q:1951-74,H:314-942^70.747%ID^E:0^RecName: Full=Endo-1,4-beta-xylanase 1 {ECO:0000303|PubMed:12154138};^Eukaryota; Viridiplantae; Streptophyta; Embryophyta; Tracheophyta; Spermatophyta; Magnoliopsida; eudicotyledons; Gunneridae; Pentapetalae; rosids; malvids; Brassicales; Brassicaceae; Camelineae; Arabidopsis`XYN1_ARATH^XYN1_ARATH^Q:1951-1241,H:148-375^28.049%ID^E:1.35e-20^R…	0.640284	0.747299	0.736154	-0.11138	1.06584	0.901407	1.93716	1.50059	1.32297	1.14178	1.21598	1.19956	1.36285	0.671609	-5.71282	-4.30454	-4.31474
1	Nsylvestris_NODE_11284_length_1953_cov_227	SYS_HELAN^SYS_HELAN^Q:171-1466,H:1-432^84.259%ID^E:0^RecName: Full=Serine--tRNA ligase;^Eukaryota; Viridiplantae; Streptophyta; Embryophyta; Tracheophyta; Spermatophyta; Magnoliopsida; eudicotyledons; Gunneridae; Pentapetalae; asterids; campanulids; Asterales; Asteraceae; Asteroideae; Heliantheae alliance; Heliantheae; Helianthus	0.651714	0.48762	0.774768	-0.0881658	-0.0364852	0.581835	1.66458	1.541	0.296146	0.371544	0.746544	0.00293582	0.493778	-0.0273478	-1.99868	-2.54631	-2.91548
1	Nsylvestris_NODE_11286_length_1953_cov_186	.	0.313098	1.78019	0.894819	0.464664	0.0645636	1.98188	2.15988	0.957071	0.465102	1.36791	0.256126	0.905812	-0.409368	-0.99433	-2.84377	-4.57929	-2.78436
1	Nsylvestris_NODE_11287_length_1953_cov_168	POLR1_ARATH^POLR1_ARATH^Q:908-177,H:1221-1464^36.066%ID^E:6.69e-33^RecName: Full=Retrovirus-related Pol polyprotein from transposon RE1;^Eukaryota; Viridiplantae; Streptophyta; Embryophyta; Tracheophyta; Spermatophyta; Magnoliopsida; eudicotyledons; Gunneridae; Pentapetalae; rosids; malvids; Brassicales; Brassicaceae; Camelineae; Arabidopsis	-0.190681	0.0997685	-0.309622	-1.02422	-0.180339	0.221759	1.03911	0.809319	0.933552	1.1942	0.0479296	0.471737	0.723801	0.174193	-1.5817	-0.95207	-1.47673
1	Nsylvestris_NODE_11288_length_1953_cov_146	GAUTB_ARATH^GAUTB_ARATH^Q:426-1919,H:16-514^75.8%ID^E:0^RecName: Full=Probable galacturonosyltransferase 11;^Eukaryota; Viridiplantae; Streptophyta; Embryophyta; Tracheophyta; Spermatophyta; Magnoliopsida; eudicotyledons; Gunneridae; Pentapetalae; rosids; malvids; Brassicales; Brassicaceae; Camelineae; Arabidopsis	-0.231665	0.708443	0.405361	0.144505	0.606611	0.876902	1.74896	0.589349	0.361259	0.596036	-0.204474	0.793279	0.580794	0.243073	-1.85674	-4.06536	-1.29633
1	Nsylvestris_NODE_11289_length_1953_cov_93	PP166_ARATH^PP166_ARATH^Q:194-1453,H:38-456^39.762%ID^E:4.56e-109^RecName: Full=Pentatricopeptide repeat-containing protein At2g20710, mitochondrial;^Eukaryota; Viridiplantae; Streptophyta; Embryophyta; Tracheophyta; Spermatophyta; Magnoliopsida; eudicotyledons; Gunneridae; Pentapetalae; rosids; malvids; Brassicales; Brassicaceae; Camelineae; Arabidopsis	0.332695	1.29175	-0.320128	0.146893	-0.0418556	1.24445	2.01498	0.569628	0.501923	1.14828	0.845109	0.860155	0.0511692	0.0268571	-2.97745	-4.01947	-1.67498
1	Nsylvestris_NODE_11296_length_1951_cov_226	THRC_SOLTU^THRC_SOLTU^Q:1883-360,H:17-519^91.159%ID^E:0^RecName: Full=Threonine synthase, chloroplastic;^Eukaryota; Viridiplantae; Streptophyta; Embryophyta; Tracheophyta; Spermatophyta; Magnoliopsida; eudicotyledons; Gunneridae; Pentapetalae; asterids; lamiids; Solanales; Solanaceae; Solanoideae; Solaneae; Solanum	-0.215652	0.822956	0.329028	0.167895	0.458656	0.413733	1.29809	0.824399	0.0875164	0.231105	0.0685723	-0.17829	-0.748032	0.0256003	-0.920048	-1.42147	-1.24406
1	Nsylvestris_NODE_11298_length_1951_cov_220	PME21_ARATH^PME21_ARATH^Q:1769-153,H:28-566^48.182%ID^E:1.22e-176^RecName: Full=Probable pectinesterase/pectinesterase inhibitor 21;^Eukaryota; Viridiplantae; Streptophyta; Embryophyta; Tracheophyta; Spermatophyta; Magnoliopsida; eudicotyledons; Gunneridae; Pentapetalae; rosids; malvids; Brassicales; Brassicaceae; Camelineae; Arabidopsis	1.73139	-0.905296	2.46048	-0.0268193	1.6276	-2.64585	-5.64946	0.0863361	1.0411	0.188234	3.85864	-1.27233	5.36842	0.569324	-1.11527	-3.15632	-2.16017
1	Nsylvestris_NODE_1130_length_4778_cov_141	HIPL1_ARATH^HIPL1_ARATH^Q:160-2043,H:21-656^61.599%ID^E:0^RecName: Full=HIPL1 protein;^Eukaryota; Viridiplantae; Streptophyta; Embryophyta; Tracheophyta; Spermatophyta; Magnoliopsida; eudicotyledons; Gunneridae; Pentapetalae; rosids; malvids; Brassicales; Brassicaceae; Camelineae; Arabidopsis	0.992724	1.07125	0.773017	0.245772	0.69441	1.14119	2.09122	1.39711	0.491308	0.51529	0.834169	0.931743	1.01294	0.294637	-5.09354	-2.1573	-5.23594
1	Nsylvestris_NODE_11302_length_1951_cov_128	PTA14_ARATH^PTA14_ARATH^Q:304-1593,H:56-483^71.395%ID^E:0^RecName: Full=Protein PLASTID TRANSCRIPTIONALLY ACTIVE 14 {ECO:0000303|PubMed:16326926};^Eukaryota; Viridiplantae; Streptophyta; Embryophyta; Tracheophyta; Spermatophyta; Magnoliopsida; eudicotyledons; Gunneridae; Pentapetalae; rosids; malvids; Brassicales; Brassicaceae; Camelineae; Arabidopsis	0.706491	0.859773	0.971952	0.0984189	0.887	1.08918	1.52149	0.498891	0.774865	0.965432	0.0549725	1.17901	0.0627679	-0.0930658	-3.55932	-2.50563	-3.51223
1	Nsylvestris_NODE_11304_length_1950_cov_221	P2C64_ARATH^P2C64_ARATH^Q:1666-476,H:1-397^75.063%ID^E:0^RecName: Full=Probable protein phosphatase 2C 64;^Eukaryota; Viridiplantae; Streptophyta; Embryophyta; Tracheophyta; Spermatophyta; Magnoliopsida; eudicotyledons; Gunneridae; Pentapetalae; rosids; malvids; Brassicales; Brassicaceae; Camelineae; Arabidopsis	0.094252	0.561725	1.62564	0.387752	1.3538	1.23964	1.94841	1.98109	1.45628	0.399689	-0.717666	0.779088	0.932195	0.203768	-3.75467	-4.40958	-4.08141
1	Nsylvestris_NODE_11305_length_1950_cov_204	PBL5_ARATH^PBL5_ARATH^Q:1608-370,H:1-411^63.183%ID^E:2.52e-179^RecName: Full=Probable serine/threonine-protein kinase PBL5 {ECO:0000305};^Eukaryota; Viridiplantae; Streptophyta; Embryophyta; Tracheophyta; Spermatophyta; Magnoliopsida; eudicotyledons; Gunneridae; Pentapetalae; rosids; malvids; Brassicales; Brassicaceae; Camelineae; Arabidopsis	1.07433	1.53374	0.710688	-0.0307094	1.2939	0.955652	2.27636	1.42745	1.11833	1.6927	0.636964	1.03768	1.18082	0.532131	-5.39623	-4.54163	-5.50217
1	Nsylvestris_NODE_11309_length_1950_cov_48	LAC17_ARATH^LAC17_ARATH^Q:1868-246,H:7-560^77.437%ID^E:0^RecName: Full=Laccase-17;^Eukaryota; Viridiplantae; Streptophyta; Embryophyta; Tracheophyta; Spermatophyta; Magnoliopsida; eudicotyledons; Gunneridae; Pentapetalae; rosids; malvids; Brassicales; Brassicaceae; Camelineae; Arabidopsis	-1.31523	1.91656	1.68809	2.30576	3.2321	0.868415	2.49263	2.2296	1.49567	1.00279	-2.27331	-0.443018	1.32707	-1.50636	-4.34026	-4.34026	-4.34026
1	Nsylvestris_NODE_1131_length_4775_cov_164	MPK9_ARATH^MPK9_ARATH^Q:3501-4442,H:203-510^77.46%ID^E:4.5e-134^RecName: Full=Mitogen-activated protein kinase 9;^Eukaryota; Viridiplantae; Streptophyta; Embryophyta; Tracheophyta; Spermatophyta; Magnoliopsida; eudicotyledons; Gunneridae; Pentapetalae; rosids; malvids; Brassicales; Brassicaceae; Camelineae; Arabidopsis`MPK9_ARATH^MPK9_ARATH^Q:1540-2199,H:1-219^89.091%ID^E:9.01e-117^RecName: Full=…	1.21878	1.08997	0.110698	-0.19257	0.672408	1.17652	2.14438	1.1437	0.457385	0.555149	0.622988	0.365314	0.875929	0.116059	-3.46467	-4.0026	-2.88944
1	Nsylvestris_NODE_11311_length_1949_cov_235	DTX40_ARATH^DTX40_ARATH^Q:105-1643,H:1-506^74.319%ID^E:0^RecName: Full=Protein DETOXIFICATION 40 {ECO:0000303|PubMed:11739388};^Eukaryota; Viridiplantae; Streptophyta; Embryophyta; Tracheophyta; Spermatophyta; Magnoliopsida; eudicotyledons; Gunneridae; Pentapetalae; rosids; malvids; Brassicales; Brassicaceae; Camelineae; Arabidopsis	-0.140964	-0.286647	-0.282925	-0.831376	-0.988411	0.519166	1.32266	1.40369	0.901578	0.769238	0.836655	0.181088	1.07719	0.857617	-1.57993	-1.89514	-1.86349
1	Nsylvestris_NODE_11315_length_1949_cov_188	EPHA_MYCTU^EPHA_MYCTU^Q:1888-944,H:1-316^35.276%ID^E:3.01e-61^RecName: Full=Epoxide hydrolase A {ECO:0000303|PubMed:16511284};^Bacteria; Actinobacteria; Corynebacteriales; Mycobacteriaceae; Mycobacterium; Mycobacterium tuberculosis complex	1.27004	0.956203	1.18299	0.21545	0.990929	0.62372	2.36277	1.52269	0.651947	0.527019	0.611612	0.346312	1.01844	0.334012	-3.47881	-4.4824	-4.65293
1	Nsylvestris_NODE_11316_length_1949_cov_185	FLK_ARATH^FLK_ARATH^Q:375-1691,H:123-559^56.278%ID^E:3.5e-143^RecName: Full=Flowering locus K homology domain {ECO:0000303|PubMed:14593172};^Eukaryota; Viridiplantae; Streptophyta; Embryophyta; Tracheophyta; Spermatophyta; Magnoliopsida; eudicotyledons; Gunneridae; Pentapetalae; rosids; malvids; Brassicales; Brassicaceae; Camelineae; Arabidopsis	1.16177	0.643748	-0.558379	0.133302	0.713999	0.805652	1.66324	1.78384	0.400802	0.888805	0.0196871	0.369954	0.469724	-0.259754	-1.75368	-3.16518	-3.31753
1	Nsylvestris_NODE_11317_length_1949_cov_171	TPT_FLATR^TPT_FLATR^Q:445-1530,H:63-403^76.243%ID^E:9.9e-174^RecName: Full=Triose phosphate/phosphate translocator, chloroplastic;^Eukaryota; Viridiplantae; Streptophyta; Embryophyta; Tracheophyta; Spermatophyta; Magnoliopsida; eudicotyledons; Gunneridae; Pentapetalae; asterids; campanulids; Asterales; Asteraceae; Asteroideae; Heliantheae alliance; Tageteae; Flaveria	-0.304232	-0.911914	-0.8448	-0.78067	-0.350035	0.783231	1.38227	1.51595	0.865693	0.503123	0.503123	-1.71927	0.187621	1.05332	0.0176964	-0.8448	-1.0563
1	Nsylvestris_NODE_11319_length_1949_cov_106	.	-0.50796	0.639819	1.38098	0.502185	0.502185	1.57402	1.76666	1.57402	0.88214	0.76546	0.767864	-1.78973	0.215563	0.1817	-2.8183	-2.8183	-2.8183
1	Nsylvestris_NODE_11320_length_1949_cov_100	.	0.811271	1.39623	1.59554	-0.271192	2.10078	-0.658215	1.06761	1.47424	1.31377	1.47424	0.100777	1.66371	1.19593	-1.18873	-3.35865	-4.35865	-4.35865
1	Nsylvestris_NODE_11322_length_1949_cov_65	RN217_XENLA^RN217_XENLA^Q:619-1143,H:18-193^30.055%ID^E:2.13e-17^RecName: Full=Probable E3 ubiquitin-protein ligase RNF217;^Eukaryota; Metazoa; Chordata; Craniata; Vertebrata; Euteleostomi; Amphibia; Batrachia; Anura; Pipoidea; Pipidae; Xenopodinae; Xenopus; Xenopus	0.417168	0.936679	0.194775	0.0503853	0.08786	2.37231	2.60981	1.58395	1.2614	1.56958	-0.0670231	1.06943	0.659444	0.846852	-4.19754	-5.19754	-4.19754
1	Nsylvestris_NODE_11323_length_1949_cov_57	.	0.420498	0.876178	1.39974	0.378678	0.963641	1.4205	2.75065	2.21008	0.71748	0.814777	0.576618	0.335609	0.613143	0.648767	-4.70878	-4.70878	-4.70878
1	Nsylvestris_NODE_11325_length_1949_cov_33	CAAT4_ARATH^CAAT4_ARATH^Q:99-1640,H:3-526^61.524%ID^E:0^RecName: Full=Cationic amino acid transporter 4, vacuolar;^Eukaryota; Viridiplantae; Streptophyta; Embryophyta; Tracheophyta; Spermatophyta; Magnoliopsida; eudicotyledons; Gunneridae; Pentapetalae; rosids; malvids; Brassicales; Brassicaceae; Camelineae; Arabidopsis	1.35291	0.977295	-0.343148	-0.323485	-0.564715	-0.0792886	1.69832	0.920711	-0.301681	0.113356	0.44248	-0.301681	0.813796	-0.886644	-1.4698	-0.299279	-1.74914
1	Nsylvestris_NODE_11329_length_1948_cov_201	R13L1_ARATH^R13L1_ARATH^Q:1940-6,H:129-777^39.549%ID^E:3.96e-133^RecName: Full=Putative disease resistance RPP13-like protein 1;^Eukaryota; Viridiplantae; Streptophyta; Embryophyta; Tracheophyta; Spermatophyta; Magnoliopsida; eudicotyledons; Gunneridae; Pentapetalae; rosids; malvids; Brassicales; Brassicaceae; Camelineae; Arabidopsis	1.23258	1.31754	0.489959	0.0192913	0.346996	0.852316	1.94611	0.735686	1.09715	0.4095	1.58247	0.721649	1.15356	0.477906	-3.84402	-4.41214	-4.12655
1	Nsylvestris_NODE_11332_length_1948_cov_141	E1314_ARATH^E1314_ARATH^Q:129-1115,H:28-357^66.061%ID^E:2.04e-163^RecName: Full=Glucan endo-1,3-beta-glucosidase 14;^Eukaryota; Viridiplantae; Streptophyta; Embryophyta; Tracheophyta; Spermatophyta; Magnoliopsida; eudicotyledons; Gunneridae; Pentapetalae; rosids; malvids; Brassicales; Brassicaceae; Camelineae; Arabidopsis	0.388455	0.870968	1.45278	0.149788	0.872361	0.817769	1.86182	1.20017	2.02941	1.71982	-0.0265826	1.87685	1.22874	-0.394385	-6.20071	-3.68217	-4.16509
1	Nsylvestris_NODE_11335_length_1948_cov_71	.	-0.769149	0.296091	0.763234	-0.27457	0.219685	1.1954	1.73418	-0.258867	0.523313	0.390947	0.778534	1.44006	0.322621	0.19329	-3.15941	-0.891164	-2.50419
1	Nsylvestris_NODE_11336_length_1948_cov_36	ATL6_ARATH^ATL6_ARATH^Q:219-1247,H:1-315^44.382%ID^E:8.59e-62^RecName: Full=E3 ubiquitin-protein ligase ATL6;^Eukaryota; Viridiplantae; Streptophyta; Embryophyta; Tracheophyta; Spermatophyta; Magnoliopsida; eudicotyledons; Gunneridae; Pentapetalae; rosids; malvids; Brassicales; Brassicaceae; Camelineae; Arabidopsis	-0.0297812	-0.19189	0.151833	-1.20261	0.588193	0.626317	2.01534	1.54515	0.987156	0.843138	0.133085	1.02701	0.983447	0.520466	-2.77381	-2.76017	-2.46288
1	Nsylvestris_NODE_11339_length_1947_cov_223	KN13B_ARATH^KN13B_ARATH^Q:1945-626,H:244-681^78.182%ID^E:0^RecName: Full=Kinesin-like protein KIN-13B {ECO:0000305};^Eukaryota; Viridiplantae; Streptophyta; Embryophyta; Tracheophyta; Spermatophyta; Magnoliopsida; eudicotyledons; Gunneridae; Pentapetalae; rosids; malvids; Brassicales; Brassicaceae; Camelineae; Arabidopsis	-0.778277	0.254775	1.58394	0.22054	0.622735	0.731085	1.61513	0.797637	-0.341692	0.00794258	-0.361926	0.043977	-0.269377	-0.308303	-0.936101	-1.93288	-0.949204
1	Nsylvestris_NODE_11342_length_1947_cov_162	FDL1_ARATH^FDL1_ARATH^Q:159-545,H:4-130^34.884%ID^E:1.13e-23^RecName: Full=F-box/FBD/LRR-repeat protein At1g13570;^Eukaryota; Viridiplantae; Streptophyta; Embryophyta; Tracheophyta; Spermatophyta; Magnoliopsida; eudicotyledons; Gunneridae; Pentapetalae; rosids; malvids; Brassicales; Brassicaceae; Camelineae; Arabidopsis`FDL1_ARATH^FDL1_ARATH^Q:550-873,H:132-237^41.667%ID^E:1.13e-23^RecName: Full=…	0.793372	1.32389	1.2673	0.396036	0.766404	1.28641	2.27689	0.430801	0.710909	0.784259	0.653194	0.793372	1.28641	0.530337	-4.96152	-4.96152	-3.37655
1	Nsylvestris_NODE_11343_length_1947_cov_145	RH17_ARATH^RH17_ARATH^Q:157-1839,H:25-585^66.963%ID^E:0^RecName: Full=DEAD-box ATP-dependent RNA helicase 17;^Eukaryota; Viridiplantae; Streptophyta; Embryophyta; Tracheophyta; Spermatophyta; Magnoliopsida; eudicotyledons; Gunneridae; Pentapetalae; rosids; malvids; Brassicales; Brassicaceae; Camelineae; Arabidopsis	0.0681569	1.12988	0.744109	-0.724681	0.394221	1.61904	3.20436	2.40594	0.478323	1.04793	1.31447	1.19685	0.43907	0.0466614	-4.45478	-4.45478	-4.45478
1	Nsylvestris_NODE_11344_length_1947_cov_142	.	0.792457	0.495987	-0.45991	-0.99176	0.00812817	0.643031	1.66649	1.54754	1.30899	0.846766	1.38228	0.336811	1.3904	0.621829	-3.16135	-2.83382	-3.59386
1	Nsylvestris_NODE_11345_length_1947_cov_128	OLA1_ORYSJ^OLA1_ORYSJ^Q:1104-391,H:157-394^84.454%ID^E:1.33e-143^RecName: Full=Obg-like ATPase 1 {ECO:0000255|HAMAP-Rule:MF_03167};^Eukaryota; Viridiplantae; Streptophyta; Embryophyta; Tracheophyta; Spermatophyta; Magnoliopsida; Liliopsida; Poales; Poaceae; BOP clade; Oryzoideae; Oryzeae; Oryzinae; Oryza; Oryza sativa	0.513145	0.922176	0.621764	0.0226997	0.695808	1.92956	2.20532	1.70331	0.500099	0.721876	0.321731	0.510122	0.623585	0.385072	-3.56482	-4.25467	-3.85677
1	Nsylvestris_NODE_11348_length_1947_cov_117	E2FB_ARATH^E2FB_ARATH^Q:246-1535,H:4-461^54.681%ID^E:1.99e-146^RecName: Full=Transcription factor E2FB;^Eukaryota; Viridiplantae; Streptophyta; Embryophyta; Tracheophyta; Spermatophyta; Magnoliopsida; eudicotyledons; Gunneridae; Pentapetalae; rosids; malvids; Brassicales; Brassicaceae; Camelineae; Arabidopsis	0.432939	1.14987	0.851674	0.312378	0.152592	1.41495	2.422	1.49714	0.780124	0.580213	0.708075	0.751511	0.160037	0.523619	-2.06213	-4.41752	-5.25748
1	Nsylvestris_NODE_11354_length_1946_cov_125	BDF2_YEAST^BDF2_YEAST^Q:901-1206,H:320-423^36.19%ID^E:2.83e-15^RecName: Full=Bromodomain-containing factor 2;^Eukaryota; Fungi; Dikarya; Ascomycota; Saccharomycotina; Saccharomycetes; Saccharomycetales; Saccharomycetaceae; Saccharomyces`BDF2_YEAST^BDF2_YEAST^Q:922-1212,H:143-238^37.113%ID^E:2.87e-11^RecName: Full=Bromodomain-containing factor 2;^Eukaryota; Fungi; Dikarya; Ascomycota; Saccharomyco…	0.959265	0.919787	0.704665	-0.27426	0.264905	1.58892	2.39406	1.6576	0.169596	0.756044	0.37185	1.46234	0.7333	0.263653	-3.28583	-3.83935	-4.84654
1	Nsylvestris_NODE_11359_length_1946_cov_63	Y5600_ARATH^Y5600_ARATH^Q:1613-207,H:6-484^56.078%ID^E:0^RecName: Full=BTB/POZ domain-containing protein At5g60050;^Eukaryota; Viridiplantae; Streptophyta; Embryophyta; Tracheophyta; Spermatophyta; Magnoliopsida; eudicotyledons; Gunneridae; Pentapetalae; rosids; malvids; Brassicales; Brassicaceae; Camelineae; Arabidopsis	1.1036	1.52058	0.764141	0.781587	1.37428	1.44435	1.91828	0.389904	1.2687	1.56057	0.487515	0.118411	0.480758	-0.281083	-4.31054	-4.31054	-4.31054
1	Nsylvestris_NODE_1136_length_4770_cov_182	ISPG_ARATH^ISPG_ARATH^Q:396-2615,H:1-740^83.649%ID^E:0^RecName: Full=4-hydroxy-3-methylbut-2-en-1-yl diphosphate synthase (ferredoxin), chloroplastic;^Eukaryota; Viridiplantae; Streptophyta; Embryophyta; Tracheophyta; Spermatophyta; Magnoliopsida; eudicotyledons; Gunneridae; Pentapetalae; rosids; malvids; Brassicales; Brassicaceae; Camelineae; Arabidopsis	0.486566	0.287052	0.0868091	-0.0441756	0.562213	0.696596	1.83163	1.59878	0.829441	0.503183	0.921501	0.398512	0.899324	0.57831	-3.12001	-3.1595	-3.35623
1	Nsylvestris_NODE_11361_length_1945_cov_224	.	0.504043	0.301316	0.140634	-0.451487	0.34904	0.340971	1.55676	0.943615	0.546567	0.212133	0.326571	0.535089	1.08357	0.162762	-2.47244	-1.65452	-2.42462
1	Nsylvestris_NODE_11365_length_1945_cov_184	CALSC_ARATH^CALSC_ARATH^Q:173-1945,H:1-601^69.587%ID^E:0^RecName: Full=Callose synthase 12;^Eukaryota; Viridiplantae; Streptophyta; Embryophyta; Tracheophyta; Spermatophyta; Magnoliopsida; eudicotyledons; Gunneridae; Pentapetalae; rosids; malvids; Brassicales; Brassicaceae; Camelineae; Arabidopsis	0.720612	0.958524	-0.605505	0.00715807	0.877256	1.8499	2.66566	0.613304	1.62055	0.952205	0.633687	1.48182	2.04913	0.797979	-5.23544	-4.15138	-5.23544
1	Nsylvestris_NODE_11367_length_1945_cov_73	.	1.35233	1.12994	0.866907	-0.624947	0.32925	0.960016	1.07549	0.732605	1.12994	1.23303	1.58334	0.419448	1.10297	0.584507	-3.62495	-4.62495	-3.62495
1	Nsylvestris_NODE_11369_length_1945_cov_36	.	1.08252	0.304915	1.40445	0.0825225	0.49756	0.667485	3.30491	1.81949	-0.917478	-0.180512	-0.180512	-1.50244	-0.180512	1.30491	-2.50244	-2.50244	-2.50244
1	Nsylvestris_NODE_11370_length_1946_cov_35	.	1.10076	0.100762	0.293407	0.408884	0.837727	1.066	2.47663	1.23201	0.878369	1.66264	0.708444	0.615335	1.03037	0.463332	-4.29156	-4.29156	-4.29156
1	Nsylvestris_NODE_11371_length_1945_cov_24	ARP4_ORYSJ^ARP4_ORYSJ^Q:1945-1841,H:147-181^91.429%ID^E:1.58e-10^RecName: Full=Actin-related protein 4;^Eukaryota; Viridiplantae; Streptophyta; Embryophyta; Tracheophyta; Spermatophyta; Magnoliopsida; Liliopsida; Poales; Poaceae; BOP clade; Oryzoideae; Oryzeae; Oryzinae; Oryza; Oryza sativa	0.292693	0.5822	-0.555303	0.583511	-0.877232	1.13355	0.823208	0.0315813	0.444697	1.12277	1.06856	0.583511	1.3707	2.02725	-2.87723	-2.87723	-2.87723
1	Nsylvestris_NODE_11373_length_1944_cov_233	KCS2_ARATH^KCS2_ARATH^Q:213-1772,H:5-524^73.485%ID^E:0^RecName: Full=3-ketoacyl-CoA synthase 2 {ECO:0000303|PubMed:18465198};^Eukaryota; Viridiplantae; Streptophyta; Embryophyta; Tracheophyta; Spermatophyta; Magnoliopsida; eudicotyledons; Gunneridae; Pentapetalae; rosids; malvids; Brassicales; Brassicaceae; Camelineae; Arabidopsis	1.38495	1.00778	0.661878	-0.195183	0.319937	1.32393	2.25555	2.39487	0.777267	0.149399	0.938282	-0.0655865	1.89853	0.413524	-4.62973	-4.1008	-4.53459
1	Nsylvestris_NODE_11377_length_1944_cov_198	C3H69_ARATH^C3H69_ARATH^Q:1860-805,H:1-350^65.169%ID^E:2.26e-156^RecName: Full=Putative RING-type E3 ubiquitin transferase C3H69 {ECO:0000305};^Eukaryota; Viridiplantae; Streptophyta; Embryophyta; Tracheophyta; Spermatophyta; Magnoliopsida; eudicotyledons; Gunneridae; Pentapetalae; rosids; malvids; Brassicales; Brassicaceae; Camelineae; Arabidopsis	0.684052	0.587058	-0.211419	-0.194131	0.718562	0.461325	1.30596	1.5739	0.435854	0.491749	0.522496	0.126717	0.962445	0.12558	-2.61496	-1.97357	-3.00163
1	Nsylvestris_NODE_11379_length_1944_cov_166	FHYRK_ARATH^FHYRK_ARATH^Q:323-1453,H:1-377^74.536%ID^E:0^RecName: Full=Bifunctional riboflavin kinase/FMN phosphatase;^Eukaryota; Viridiplantae; Streptophyta; Embryophyta; Tracheophyta; Spermatophyta; Magnoliopsida; eudicotyledons; Gunneridae; Pentapetalae; rosids; malvids; Brassicales; Brassicaceae; Camelineae; Arabidopsis	-0.497953	0.674112	0.323709	-0.323989	0.361578	0.0637413	1.12922	0.624481	0.753314	0.551343	0.490759	0.216204	0.559769	-0.401657	-0.867321	-1.95329	-1.70402
1	Nsylvestris_NODE_11380_length_1944_cov_150	AI5L3_ARATH^AI5L3_ARATH^Q:892-482,H:64-214^44.156%ID^E:3.67e-20^RecName: Full=ABSCISIC ACID-INSENSITIVE 5-like protein 3;^Eukaryota; Viridiplantae; Streptophyta; Embryophyta; Tracheophyta; Spermatophyta; Magnoliopsida; eudicotyledons; Gunneridae; Pentapetalae; rosids; malvids; Brassicales; Brassicaceae; Camelineae; Arabidopsis	0.862899	0.752932	0.136793	-0.194337	0.210456	2.12873	2.94388	1.42686	1.37416	0.851383	0.869707	0.949804	1.3225	0.897088	-4.36545	-3.78048	-6.38693
1	Nsylvestris_NODE_11382_length_1944_cov_79	PME51_ARATH^PME51_ARATH^Q:285-1784,H:40-546^60.236%ID^E:0^RecName: Full=Probable pectinesterase/pectinesterase inhibitor 51;^Eukaryota; Viridiplantae; Streptophyta; Embryophyta; Tracheophyta; Spermatophyta; Magnoliopsida; eudicotyledons; Gunneridae; Pentapetalae; rosids; malvids; Brassicales; Brassicaceae; Camelineae; Arabidopsis	0.740794	1.29988	0.790792	0.154692	0.462493	1.53974	2.34561	0.753143	0.952954	0.766631	0.421079	-0.0622013	1.05704	-0.510745	-3.1623	-5.0921	-2.4575
1	Nsylvestris_NODE_11383_length_1944_cov_45	.	0.447842	1.50653	-2.07572	1.0942	0.624719	1.94665	2.74446	0.316597	0.509242	0.92473	-0.0757204	0.568136	0.383711	0.731634	-2.49557	-3.07572	-4.07572
1	Nsylvestris_NODE_11384_length_1944_cov_37	PP337_ARATH^PP337_ARATH^Q:228-1715,H:32-527^56.452%ID^E:0^RecName: Full=Pentatricopeptide repeat-containing protein At4g25270, chloroplastic;^Eukaryota; Viridiplantae; Streptophyta; Embryophyta; Tracheophyta; Spermatophyta; Magnoliopsida; eudicotyledons; Gunneridae; Pentapetalae; rosids; malvids; Brassicales; Brassicaceae; Camelineae; Arabidopsis	-0.100198	2.09483	1.47802	0.463448	1.43586	1.27831	1.22173	-0.100198	0.302524	-0.253805	-0.19716	1.48428	0.665337	0.493395	-3.42213	-3.42213	-3.42213
1	Nsylvestris_NODE_11388_length_1943_cov_181	TRABD_BOVIN^TRABD_BOVIN^Q:570-1352,H:75-352^31.707%ID^E:3.15e-21^RecName: Full=TraB domain-containing protein;^Eukaryota; Metazoa; Chordata; Craniata; Vertebrata; Euteleostomi; Mammalia; Eutheria; Laurasiatheria; Cetartiodactyla; Ruminantia; Pecora; Bovidae; Bovinae; Bos	0.529564	0.597126	0.589733	-0.143333	0.69227	0.844496	1.93667	1.89374	0.660982	0.90656	0.831008	0.457373	1.39211	0.495643	-3.59642	-2.85294	-5.23458
1	Nsylvestris_NODE_11389_length_1943_cov_181	CP19D_ARATH^CP19D_ARATH^Q:228-842,H:1-201^81.463%ID^E:1.24e-105^RecName: Full=Peptidyl-prolyl cis-trans isomerase CYP19-4;^Eukaryota; Viridiplantae; Streptophyta; Embryophyta; Tracheophyta; Spermatophyta; Magnoliopsida; eudicotyledons; Gunneridae; Pentapetalae; rosids; malvids; Brassicales; Brassicaceae; Camelineae; Arabidopsis	0.833493	-0.106449	1.66451	0.00719714	0.62484	0.514546	1.7649	1.42328	0.733101	-0.170835	2.1738	0.100962	3.21084	-0.0922082	-3.56351	-5.84378	-3.2747
1	Nsylvestris_NODE_11390_length_1943_cov_158	RECA3_ARATH^RECA3_ARATH^Q:273-1424,H:1-382^76.042%ID^E:0^RecName: Full=DNA repair protein recA homolog 3, mitochondrial;^Eukaryota; Viridiplantae; Streptophyta; Embryophyta; Tracheophyta; Spermatophyta; Magnoliopsida; eudicotyledons; Gunneridae; Pentapetalae; rosids; malvids; Brassicales; Brassicaceae; Camelineae; Arabidopsis	0.671014	1.11257	-0.105349	-0.304711	0.557541	0.908795	1.81803	1.81803	-0.117482	0.327873	0.729559	0.864852	0.0106747	-0.746099	-1.63729	-3.31125	-2.59676
1	Nsylvestris_NODE_11391_length_1943_cov_150	Y5161_ARATH^Y5161_ARATH^Q:233-598,H:51-169^25%ID^E:2.22e-07^RecName: Full=Uncharacterized protein At5g01610;^Eukaryota; Viridiplantae; Streptophyta; Embryophyta; Tracheophyta; Spermatophyta; Magnoliopsida; eudicotyledons; Gunneridae; Pentapetalae; rosids; malvids; Brassicales; Brassicaceae; Camelineae; Arabidopsis	0.540315	1.05561	1.02827	0.307347	0.551938	1.7197	2.8393	1.57548	0.577754	0.812655	0.714017	0.918961	1.52585	0.210927	-3.03322	-5.67245	-5.67245
1	Nsylvestris_NODE_11393_length_1943_cov_34	XTH26_ARATH^XTH26_ARATH^Q:123-974,H:4-291^59.375%ID^E:8.11e-122^RecName: Full=Probable xyloglucan endotransglucosylase/hydrolase protein 26;^Eukaryota; Viridiplantae; Streptophyta; Embryophyta; Tracheophyta; Spermatophyta; Magnoliopsida; eudicotyledons; Gunneridae; Pentapetalae; rosids; malvids; Brassicales; Brassicaceae; Camelineae; Arabidopsis	0.82372	0.523492	0.897571	-0.837499	0.88557	0.233657	2.05384	2.54618	1.47473	1.09735	0.81862	1.02286	1.65639	0.102541	-4.76634	-3.76634	-4.76634
1	Nsylvestris_NODE_11396_length_1942_cov_148	ALG6_ARATH^ALG6_ARATH^Q:1807-266,H:1-533^58.349%ID^E:0^RecName: Full=Probable dolichyl pyrophosphate Man9GlcNAc2 alpha-1,3-glucosyltransferase;^Eukaryota; Viridiplantae; Streptophyta; Embryophyta; Tracheophyta; Spermatophyta; Magnoliopsida; eudicotyledons; Gunneridae; Pentapetalae; rosids; malvids; Brassicales; Brassicaceae; Camelineae; Arabidopsis	0.918707	1.41381	0.611958	0.236189	0.58319	1.51839	2.54011	1.12203	0.764853	0.772242	0.318404	0.808929	0.956495	0.682282	-4.78173	-4.78173	-3.68412
1	Nsylvestris_NODE_11397_length_1942_cov_119	CNG20_ARATH^CNG20_ARATH^Q:2-1666,H:197-745^71.043%ID^E:0^RecName: Full=Probable cyclic nucleotide-gated ion channel 20, chloroplastic;^Eukaryota; Viridiplantae; Streptophyta; Embryophyta; Tracheophyta; Spermatophyta; Magnoliopsida; eudicotyledons; Gunneridae; Pentapetalae; rosids; malvids; Brassicales; Brassicaceae; Camelineae; Arabidopsis	0.355444	0.732313	-0.832088	-0.680863	-0.687883	1.81332	2.30892	0.902932	1.40082	1.20794	0.463944	2.17204	1.80772	1.65014	-3.16769	-4.72351	-4.72351
1	Nsylvestris_NODE_11398_length_1942_cov_105	.	1.30562	0.0964018	0.957248	-1.48964	1.47633	-2.12035	-1.43576	-1.57766	2.04733	1.89859	0.476512	1.16752	1.46725	-1.18831	-1.74188	-0.255351	-1.08387
1	Nsylvestris_NODE_11402_length_1941_cov_209	SCKL1_ARATH^SCKL1_ARATH^Q:1617-385,H:63-471^77.372%ID^E:0^RecName: Full=Fructokinase-like 1, chloroplastic {ECO:0000312|EMBL:AEE79187.1};^Eukaryota; Viridiplantae; Streptophyta; Embryophyta; Tracheophyta; Spermatophyta; Magnoliopsida; eudicotyledons; Gunneridae; Pentapetalae; rosids; malvids; Brassicales; Brassicaceae; Camelineae; Arabidopsis	0.0488415	1.5647	0.908441	0.118793	0.257889	1.9465	2.46042	0.933445	1.09952	0.850304	0.933445	1.6787	0.305688	0.697899	-3.79133	-5.84791	-4.16534
1	Nsylvestris_NODE_11404_length_1941_cov_196	.	0.362242	0.587232	0.835496	0.253797	0.748693	1.4173	1.9085	0.682432	0.227553	0.152169	-0.0866625	-2.54478	-1.8978	-2.30362	-0.0601264	-0.324385	0.041953
1	Nsylvestris_NODE_11405_length_1941_cov_116	AB12I_ARATH^AB12I_ARATH^Q:1351-899,H:240-390^68.212%ID^E:2.83e-63^RecName: Full=Protein ABCI12, chloroplastic;^Eukaryota; Viridiplantae; Streptophyta; Embryophyta; Tracheophyta; Spermatophyta; Magnoliopsida; eudicotyledons; Gunneridae; Pentapetalae; rosids; malvids; Brassicales; Brassicaceae; Camelineae; Arabidopsis	1.03644	1.06915	0.83376	-0.52881	-0.187231	1.30769	2.37657	1.33569	0.708229	1.36455	1.01751	0.216581	0.570725	0.873288	-4.33617	-4.33617	-3.32181
1	Nsylvestris_NODE_11406_length_1941_cov_115	VDE_TOBAC^VDE_TOBAC^Q:1112-273,H:137-400^21.959%ID^E:1.03e-06^RecName: Full=Violaxanthin de-epoxidase, chloroplastic;^Eukaryota; Viridiplantae; Streptophyta; Embryophyta; Tracheophyta; Spermatophyta; Magnoliopsida; eudicotyledons; Gunneridae; Pentapetalae; asterids; lamiids; Solanales; Solanaceae; Nicotianoideae; Nicotianeae; Nicotiana	0.170862	0.26063	0.272865	-0.648438	0.64488	1.01449	1.99688	1.68752	-0.00794383	-0.0856494	0.305655	0.612084	-0.256334	0.230627	-2.0654	-1.04839	-3.08435
1	Nsylvestris_NODE_1141_length_4765_cov_225	KEA2_ARATH^KEA2_ARATH^Q:4059-430,H:1-1174^68.52%ID^E:0^RecName: Full=K(+) efflux antiporter 2, chloroplastic {ECO:0000303|PubMed:11500563};^Eukaryota; Viridiplantae; Streptophyta; Embryophyta; Tracheophyta; Spermatophyta; Magnoliopsida; eudicotyledons; Gunneridae; Pentapetalae; rosids; malvids; Brassicales; Brassicaceae; Camelineae; Arabidopsis	0.867309	0.67254	-0.042531	-0.571105	-0.163862	1.45047	1.91214	0.345164	1.32194	0.739014	1.24194	0.672464	1.1905	0.821009	-3.88521	-2.33735	-4.23443
1	Nsylvestris_NODE_11410_length_1940_cov_212	PWP1_BOVIN^PWP1_BOVIN^Q:341-1564,H:78-471^39.512%ID^E:1.14e-79^RecName: Full=Periodic tryptophan protein 1 homolog;^Eukaryota; Metazoa; Chordata; Craniata; Vertebrata; Euteleostomi; Mammalia; Eutheria; Laurasiatheria; Cetartiodactyla; Ruminantia; Pecora; Bovidae; Bovinae; Bos	0.240352	0.787085	0.552691	-0.726158	0.00495552	0.796876	1.74651	1.5543	0.44973	0.0988485	0.546721	-0.0338811	-0.397883	-1.00255	-1.48399	-1.24156	-1.89204
1	Nsylvestris_NODE_11413_length_1940_cov_175	SBP1_ANTMA^SBP1_ANTMA^Q:1786-1484,H:1-104^55.66%ID^E:1.85e-25^RecName: Full=Squamosa promoter-binding protein 1;^Eukaryota; Viridiplantae; Streptophyta; Embryophyta; Tracheophyta; Spermatophyta; Magnoliopsida; eudicotyledons; Gunneridae; Pentapetalae; asterids; lamiids; Lamiales; Plantaginaceae; Antirrhineae; Antirrhinum`SBP1_ANTMA^SBP1_ANTMA^Q:460-371,H:97-126^90%ID^E:1.05e-09^RecName: Full=Squa…	0.649117	0.952643	0.439243	0.024431	0.606786	1.82317	2.87556	2.11175	0.883241	-0.533731	0.058588	-0.250555	1.72524	0.700811	-2.5302	-3.97557	-5.56053
1	Nsylvestris_NODE_11414_length_1939_cov_45	.	1.51534	0.627089	0.55381	-0.0104208	-0.234686	-0.109155	1.30543	-0.694117	0.305883	1.43269	1.76531	1.21325	1.59128	0.820636	-3.69412	-3.69412	-2.69412
1	Nsylvestris_NODE_11415_length_1940_cov_37	AZG2_ARATH^AZG2_ARATH^Q:1884-262,H:1-530^64.51%ID^E:0^RecName: Full=Adenine/guanine permease AZG2;^Eukaryota; Viridiplantae; Streptophyta; Embryophyta; Tracheophyta; Spermatophyta; Magnoliopsida; eudicotyledons; Gunneridae; Pentapetalae; rosids; malvids; Brassicales; Brassicaceae; Camelineae; Arabidopsis	-0.900531	0.214904	-0.223292	-0.183576	0.582277	2.16777	3.33902	2.12068	-1.51295	0.0720101	-0.899976	-0.581158	0.103627	-1.37391	-1.1423	-1.10153	-0.681075
1	Nsylvestris_NODE_11416_length_1938_cov_212	DGDG2_LOTJA^DGDG2_LOTJA^Q:1659-304,H:1-463^68.319%ID^E:0^RecName: Full=Digalactosyldiacylglycerol synthase 2, chloroplastic;^Eukaryota; Viridiplantae; Streptophyta; Embryophyta; Tracheophyta; Spermatophyta; Magnoliopsida; eudicotyledons; Gunneridae; Pentapetalae; rosids; fabids; Fabales; Fabaceae; Papilionoideae; 50 kb inversion clade; NPAAA clade; Hologalegina; robinioid clade; Loteae; Lotus	0.820639	1.13514	1.45209	0.625003	1.09689	1.48947	2.15624	1.99876	0.788552	0.0939427	0.467614	0.642772	1.59817	0.153647	-3.94439	-5.28727	-5.28727
1	Nsylvestris_NODE_11417_length_1939_cov_180	BGL47_ARATH^BGL47_ARATH^Q:1759-209,H:3-511^53.612%ID^E:0^RecName: Full=Beta-glucosidase 47;^Eukaryota; Viridiplantae; Streptophyta; Embryophyta; Tracheophyta; Spermatophyta; Magnoliopsida; eudicotyledons; Gunneridae; Pentapetalae; rosids; malvids; Brassicales; Brassicaceae; Camelineae; Arabidopsis	1.48346	1.14785	1.51042	0.925462	1.45598	1.89509	2.94536	2.65036	-1.07454	-0.720901	1.94536	-0.996535	1.60103	-0.0350094	-5.24446	-5.24446	-4.24446
1	Nsylvestris_NODE_11418_length_1939_cov_120	SBT3_SOLLC^SBT3_SOLLC^Q:1937-183,H:177-761^91.795%ID^E:0^RecName: Full=Subtilisin-like protease SBT3 {ECO:0000303|PubMed:27259555};^Eukaryota; Viridiplantae; Streptophyta; Embryophyta; Tracheophyta; Spermatophyta; Magnoliopsida; eudicotyledons; Gunneridae; Pentapetalae; asterids; lamiids; Solanales; Solanaceae; Solanoideae; Solaneae; Solanum; Lycopersicon	0.651791	-0.48045	-0.775725	0.837487	-0.0231936	0.214461	1.38985	0.635334	1.3723	2.37313	2.20241	0.488328	-0.0145114	0.0884826	-2.28681	-3.33644	-3.33644
1	Nsylvestris_NODE_11421_length_1939_cov_28	.	0.60858	0.830973	0.438655	-0.561345	-0.0888571	-0.239417	1.43866	0.60858	-0.561345	0.526966	0.60858	0.686583	0.686583	0.526118	-0.976382	-1.97158	-2.56134
1	Nsylvestris_NODE_11422_length_1939_cov_14	Y5537_ARATH^Y5537_ARATH^Q:5-1825,H:275-872^51.935%ID^E:0^RecName: Full=G-type lectin S-receptor-like serine/threonine-protein kinase At5g35370;^Eukaryota; Viridiplantae; Streptophyta; Embryophyta; Tracheophyta; Spermatophyta; Magnoliopsida; eudicotyledons; Gunneridae; Pentapetalae; rosids; malvids; Brassicales; Brassicaceae; Camelineae; Arabidopsis	0.300536	-0.491086	0.935252	-0.373924	-0.11089	0.111502	2.00459	1.69646	0.999028	1.94685	-1.61179	2.42599	0.628958	-0.373924	-2.69585	-2.69585	-2.69585
1	Nsylvestris_NODE_11423_length_1938_cov_225	HIBN_XENLA^HIBN_XENLA^Q:693-1340,H:329-505^23.744%ID^E:2.47e-07^RecName: Full=Histone-binding protein N1/N2;^Eukaryota; Metazoa; Chordata; Craniata; Vertebrata; Euteleostomi; Amphibia; Batrachia; Anura; Pipoidea; Pipidae; Xenopodinae; Xenopus; Xenopus	-0.486086	0.109366	0.0117891	-0.917834	-0.958784	0.672876	1.43885	0.450389	0.735781	0.418495	0.746238	0.76074	0.617469	0.127798	-1.53104	-1.18529	-1.01075
1	Nsylvestris_NODE_11426_length_1938_cov_77	P2C55_ARATH^P2C55_ARATH^Q:301-1416,H:94-458^53.439%ID^E:4.13e-122^RecName: Full=Probable protein phosphatase 2C 55;^Eukaryota; Viridiplantae; Streptophyta; Embryophyta; Tracheophyta; Spermatophyta; Magnoliopsida; eudicotyledons; Gunneridae; Pentapetalae; rosids; malvids; Brassicales; Brassicaceae; Camelineae; Arabidopsis	0.779085	1.42722	-0.185129	0.809451	1.17832	1.19311	2.19033	1.68277	0.350924	1.07067	-0.11268	1.26536	0.748066	-0.594407	-2.78897	-4.50706	-4.50706
1	Nsylvestris_NODE_11427_length_1938_cov_72	.	0.264455	1.30008	0.0299901	0.52749	0.466089	1.15198	2.28948	1.58638	0.800508	0.466089	0.800508	1.11245	-0.150582	0.52749	-4.05747	-4.05747	-3.05747
1	Nsylvestris_NODE_11428_length_1938_cov_34	.	2.2223	1.32418	0.551956	1.06318	0.514651	0.768044	2.42266	-0.597518	0.803556	1.03413	1.00807	0.640312	1.36645	0.965949	-4.69597	-4.69597	-4.69597
1	Nsylvestris_NODE_1143_length_4764_cov_158	DEXH7_ARATH^DEXH7_ARATH^Q:63-4322,H:29-1455^63.592%ID^E:0^RecName: Full=DExH-box ATP-dependent RNA helicase DExH7, chloroplastic {ECO:0000305};^Eukaryota; Viridiplantae; Streptophyta; Embryophyta; Tracheophyta; Spermatophyta; Magnoliopsida; eudicotyledons; Gunneridae; Pentapetalae; rosids; malvids; Brassicales; Brassicaceae; Camelineae; Arabidopsis	0.412123	1.01333	0.56208	-0.240901	0.245006	0.956431	2.05056	0.804762	1.43554	0.874943	1.38053	1.37386	1.62331	0.854411	-3.5423	-4.66593	-5.13775
1	Nsylvestris_NODE_11430_length_1937_cov_227	DNJA6_ARATH^DNJA6_ARATH^Q:238-1563,H:1-439^72.072%ID^E:0^RecName: Full=Chaperone protein dnaJ A6, chloroplastic {ECO:0000305};^Eukaryota; Viridiplantae; Streptophyta; Embryophyta; Tracheophyta; Spermatophyta; Magnoliopsida; eudicotyledons; Gunneridae; Pentapetalae; rosids; malvids; Brassicales; Brassicaceae; Camelineae; Arabidopsis	-0.15728	0.42663	-0.769514	-0.812007	-0.409698	1.78322	2.55881	1.54958	1.03888	0.979325	0.48282	0.651898	0.717838	0.497416	-2.75023	-2.70336	-3.08432
1	Nsylvestris_NODE_11433_length_1937_cov_217	CDKD1_ORYSJ^CDKD1_ORYSJ^Q:1693-488,H:8-417^74.696%ID^E:0^RecName: Full=Cyclin-dependent kinase D-1;^Eukaryota; Viridiplantae; Streptophyta; Embryophyta; Tracheophyta; Spermatophyta; Magnoliopsida; Liliopsida; Poales; Poaceae; BOP clade; Oryzoideae; Oryzeae; Oryzinae; Oryza; Oryza sativa	0.524947	0.522283	-0.319373	-0.382178	-0.151372	0.813027	1.48359	0.974657	0.265589	0.548555	0.0245422	0.29608	0.655819	-0.0500903	-1.5734	-1.93355	-1.69912
1	Nsylvestris_NODE_11438_length_1937_cov_113	KN7O_ARATH^KN7O_ARATH^Q:1930-191,H:697-1271^44.822%ID^E:5.42e-123^RecName: Full=Kinesin-like protein KIN-7O {ECO:0000305};^Eukaryota; Viridiplantae; Streptophyta; Embryophyta; Tracheophyta; Spermatophyta; Magnoliopsida; eudicotyledons; Gunneridae; Pentapetalae; rosids; malvids; Brassicales; Brassicaceae; Camelineae; Arabidopsis	0.504578	1.54166	1.33351	0.171289	0.222543	1.5065	1.38934	2.05904	-0.520682	-0.854419	0.12192	0.921541	0.506503	0.0590443	-3.40039	-3.40039	-2.1616
1	Nsylvestris_NODE_11440_length_1937_cov_68	PPR35_ARATH^PPR35_ARATH^Q:494-1390,H:53-360^45.13%ID^E:1.51e-79^RecName: Full=Pentatricopeptide repeat-containing protein At1g11900;^Eukaryota; Viridiplantae; Streptophyta; Embryophyta; Tracheophyta; Spermatophyta; Magnoliopsida; eudicotyledons; Gunneridae; Pentapetalae; rosids; malvids; Brassicales; Brassicaceae; Camelineae; Arabidopsis	0.242113	1.27453	0.952607	0.0306091	0.736878	1.61557	2.08646	1.33727	0.483676	1.5106	0.827076	0.912377	0.689572	-0.0473934	-4.21732	-4.21732	-4.21732
1	Nsylvestris_NODE_11442_length_1936_cov_224	MMK2_MEDSA^MMK2_MEDSA^Q:325-1416,H:4-368^86.027%ID^E:0^RecName: Full=Mitogen-activated protein kinase homolog MMK2;^Eukaryota; Viridiplantae; Streptophyta; Embryophyta; Tracheophyta; Spermatophyta; Magnoliopsida; eudicotyledons; Gunneridae; Pentapetalae; rosids; fabids; Fabales; Fabaceae; Papilionoideae; 50 kb inversion clade; NPAAA clade; Hologalegina; IRL clade; Trifolieae; Medicago	0.370361	0.634521	-0.0350877	-0.904081	0.678987	0.865214	1.61684	1.20732	0.460166	0.362148	0.16648	0.135073	0.77426	0.198896	-2.58943	-1.76147	-2.1802
1	Nsylvestris_NODE_11443_length_1936_cov_217	NIPA4_ARATH^NIPA4_ARATH^Q:360-1391,H:4-343^80.29%ID^E:2.04e-167^RecName: Full=Probable magnesium transporter NIPA4;^Eukaryota; Viridiplantae; Streptophyta; Embryophyta; Tracheophyta; Spermatophyta; Magnoliopsida; eudicotyledons; Gunneridae; Pentapetalae; rosids; malvids; Brassicales; Brassicaceae; Camelineae; Arabidopsis	0.941031	0.79466	0.37256	0.0150132	1.00057	1.16851	1.7741	1.30118	1.07266	0.879302	0.478772	0.272952	1.11861	0.402859	-4.03147	-3.75303	-3.80827
1	Nsylvestris_NODE_11445_length_1936_cov_194	RH22_ORYSJ^RH22_ORYSJ^Q:1625-165,H:76-572^63.581%ID^E:0^RecName: Full=DEAD-box ATP-dependent RNA helicase 22;^Eukaryota; Viridiplantae; Streptophyta; Embryophyta; Tracheophyta; Spermatophyta; Magnoliopsida; Liliopsida; Poales; Poaceae; BOP clade; Oryzoideae; Oryzeae; Oryzinae; Oryza; Oryza sativa	1.21229	1.1706	1.24236	0.0805098	0.182813	2.05186	2.65191	2.19971	-2.54772	-0.244351	-1.70779	0.930754	0.805492	-0.370489	-2.25911	-1.76983	-3.62902
1	Nsylvestris_NODE_11447_length_1936_cov_163	.	-0.298146	0.751362	0.554903	-0.470043	0.747124	1.2748	2.30394	2.74755	0.553448	0.418708	0.685114	1.33251	2.25568	0.162798	-4.33991	-4.33991	-4.33991
1	Nsylvestris_NODE_11448_length_1936_cov_137	.	-0.384044	0.303104	-0.217946	0.482493	0.103982	0.493549	1.8935	-1.21795	1.42706	-0.632984	0.758417	3.17437	2.36702	1.10326	-3.21795	-3.21795	-3.21795
1	Nsylvestris_NODE_11449_length_1936_cov_127	FLZ10_ARATH^FLZ10_ARATH^Q:1618-599,H:13-307^36.695%ID^E:5.04e-37^RecName: Full=FCS-Like Zinc finger 10 {ECO:0000303|PubMed:24901469};^Eukaryota; Viridiplantae; Streptophyta; Embryophyta; Tracheophyta; Spermatophyta; Magnoliopsida; eudicotyledons; Gunneridae; Pentapetalae; rosids; malvids; Brassicales; Brassicaceae; Camelineae; Arabidopsis	-0.344754	1.32314	-0.888085	-1.05729	0.931311	1.87745	2.97876	2.03791	-0.0358195	1.684	1.29842	-1.21001	0.602143	0.00825166	-3.79498	-1.61546	-3.79498
1	Nsylvestris_NODE_11450_length_1936_cov_113	GLYT3_ARATH^GLYT3_ARATH^Q:292-1320,H:173-510^33.427%ID^E:3.37e-50^RecName: Full=Probable glycosyltransferase At5g03795;^Eukaryota; Viridiplantae; Streptophyta; Embryophyta; Tracheophyta; Spermatophyta; Magnoliopsida; eudicotyledons; Gunneridae; Pentapetalae; rosids; malvids; Brassicales; Brassicaceae; Camelineae; Arabidopsis	0.337315	0.576102	0.10285	-0.0777227	-0.399651	0.770274	2.40753	1.84828	1.22523	0.601551	0.431551	0.402198	0.744396	0.969583	-2.97026	-2.98461	-3.98461
1	Nsylvestris_NODE_11451_length_1936_cov_99	MY105_ARATH^MY105_ARATH^Q:302-940,H:3-219^56.71%ID^E:7.38e-73^RecName: Full=Transcription factor MYB105 {ECO:0000305};^Eukaryota; Viridiplantae; Streptophyta; Embryophyta; Tracheophyta; Spermatophyta; Magnoliopsida; eudicotyledons; Gunneridae; Pentapetalae; rosids; malvids; Brassicales; Brassicaceae; Camelineae; Arabidopsis	-0.631348	1.58165	1.15715	-0.768851	0.301538	1.5127	1.7378	-0.0971049	0.161697	0.767202	1.0385	0.909221	1.72914	1.28808	-2.50582	-4.09078	-4.09078
1	Nsylvestris_NODE_11452_length_1936_cov_84	WEE1_ARATH^WEE1_ARATH^Q:1890-694,H:97-497^62.687%ID^E:1.19e-178^RecName: Full=Wee1-like protein kinase;^Eukaryota; Viridiplantae; Streptophyta; Embryophyta; Tracheophyta; Spermatophyta; Magnoliopsida; eudicotyledons; Gunneridae; Pentapetalae; rosids; malvids; Brassicales; Brassicaceae; Camelineae; Arabidopsis	1.47675	0.316442	1.49245	0.456438	0.322311	1.89617	2.03188	0.872365	-0.168201	-0.780855	0.316442	0.861658	0.0216987	-1.42576	-2.56326	-2.56326	-2.56326
1	Nsylvestris_NODE_11454_length_1936_cov_9	.	-2.18898	1.13295	-0.18898	0.132948	-0.604018	1.39598	2.05895	1.27045	0.81102	0.395982	0.618375	-0.604018	0.618375	0.132948	-2.18898	-0.604018	-2.18898
1	Nsylvestris_NODE_11458_length_1933_cov_122	OTU9_ARATH^OTU9_ARATH^Q:1545-856,H:4-239^35.656%ID^E:6.07e-23^RecName: Full=OVARIAN TUMOR DOMAIN-containing deubiquitinating enzyme 9 {ECO:0000303|PubMed:24659992};^Eukaryota; Viridiplantae; Streptophyta; Embryophyta; Tracheophyta; Spermatophyta; Magnoliopsida; eudicotyledons; Gunneridae; Pentapetalae; rosids; malvids; Brassicales; Brassicaceae; Camelineae; Arabidopsis	0.396883	0.966272	0.820761	0.3144	0.503519	0.977938	2.01631	-0.425448	-0.254687	0.315151	-0.701083	-0.276019	-0.914266	-0.588646	-1.20377	-0.724044	-1.22327
1	Nsylvestris_NODE_11459_length_1935_cov_72	.	1.2915	0.490811	0.191966	0.996046	0.490811	0.114949	1.62323	1.43216	-0.00395388	0.864661	0.746068	-0.0710681	1.68636	0.536614	-3.46339	-4.46339	-2.46339
1	Nsylvestris_NODE_1146_length_4763_cov_36	.	1.07106	0.848668	-0.288835	0.230539	-0.585144	1.16183	1.61163	0.933557	0.605433	0.292918	0.781554	0.418395	0.781325	-0.24153	-2.8738	-1.8738	-2.8738
1	Nsylvestris_NODE_11461_length_1935_cov_20	.	-0.911217	-0.174252	1.96325	0.673745	0.825748	1.31118	2.31118	0.50382	-2.49618	-0.49618	-1.49618	-2.49618	-0.174252	-0.49618	1.75175	-0.911217	0.311175
1	Nsylvestris_NODE_11463_length_1935_cov_206	DTX31_ARATH^DTX31_ARATH^Q:106-1620,H:4-512^68.173%ID^E:0^RecName: Full=Protein DETOXIFICATION 31 {ECO:0000303|PubMed:11739388};^Eukaryota; Viridiplantae; Streptophyta; Embryophyta; Tracheophyta; Spermatophyta; Magnoliopsida; eudicotyledons; Gunneridae; Pentapetalae; rosids; malvids; Brassicales; Brassicaceae; Camelineae; Arabidopsis	1.8913	1.14144	-0.509174	0.0940999	0.440908	1.42371	2.33991	2.08946	1.22357	1.04452	1.00684	0.549654	1.83715	0.558766	-5.95362	-4.44244	-4.73607
1	Nsylvestris_NODE_11464_length_1934_cov_197	CAND7_ARATH^CAND7_ARATH^Q:1622-426,H:22-421^52.12%ID^E:4.04e-139^RecName: Full=Protein CANDIDATE G-PROTEIN COUPLED RECEPTOR 7 {ECO:0000303|PubMed:18671868};^Eukaryota; Viridiplantae; Streptophyta; Embryophyta; Tracheophyta; Spermatophyta; Magnoliopsida; eudicotyledons; Gunneridae; Pentapetalae; rosids; malvids; Brassicales; Brassicaceae; Camelineae; Arabidopsis	0.375081	1.36187	1.83613	0.726843	1.29884	-0.442414	1.58216	1.07565	0.82494	1.00251	0.964339	0.756119	3.00798	-0.636409	-2.70631	-5.51366	-5.51366
1	Nsylvestris_NODE_11466_length_1934_cov_182	ZDHC3_ARATH^ZDHC3_ARATH^Q:1838-54,H:1-507^54.606%ID^E:0^RecName: Full=Protein S-acyltransferase 21;^Eukaryota; Viridiplantae; Streptophyta; Embryophyta; Tracheophyta; Spermatophyta; Magnoliopsida; eudicotyledons; Gunneridae; Pentapetalae; rosids; malvids; Brassicales; Brassicaceae; Camelineae; Arabidopsis	1.31774	1.82994	0.272188	0.149659	0.981636	1.66409	2.52879	1.71156	1.0831	0.569809	0.270662	0.695719	0.465151	0.122274	-4.55411	-4.55411	-4.55411
1	Nsylvestris_NODE_11468_length_1934_cov_46	NPR5_ARATH^NPR5_ARATH^Q:1620-253,H:20-472^77.44%ID^E:0^RecName: Full=Regulatory protein NPR5;^Eukaryota; Viridiplantae; Streptophyta; Embryophyta; Tracheophyta; Spermatophyta; Magnoliopsida; eudicotyledons; Gunneridae; Pentapetalae; rosids; malvids; Brassicales; Brassicaceae; Camelineae; Arabidopsis	0.355293	0.994001	0.269909	-1.06205	0.844288	1.21373	1.67337	0.255345	0.441171	0.975473	0.248526	0.40576	0.977224	0.0261337	-3.53439	-1.01554	-3.06823
1	Nsylvestris_NODE_1147_length_4762_cov_160	ZFNL_PEA^ZFNL_PEA^Q:4393-3155,H:5-417^69.212%ID^E:2.86e-177^RecName: Full=Zinc finger CCCH domain-containing protein ZFN-like;^Eukaryota; Viridiplantae; Streptophyta; Embryophyta; Tracheophyta; Spermatophyta; Magnoliopsida; eudicotyledons; Gunneridae; Pentapetalae; rosids; fabids; Fabales; Fabaceae; Papilionoideae; 50 kb inversion clade; NPAAA clade; Hologalegina; IRL clade; Fabeae; Pisum	0.601831	0.637972	0.452892	0.211703	0.894521	0.757086	1.83685	1.3665	0.832783	0.732489	0.748354	0.480252	1.43347	0.320264	-3.8766	-3.13107	-4.29929
1	Nsylvestris_NODE_11472_length_1933_cov_198	SIS3_ARATH^SIS3_ARATH^Q:360-1376,H:1-342^76.608%ID^E:0^RecName: Full=E3 ubiquitin-protein ligase SIS3;^Eukaryota; Viridiplantae; Streptophyta; Embryophyta; Tracheophyta; Spermatophyta; Magnoliopsida; eudicotyledons; Gunneridae; Pentapetalae; rosids; malvids; Brassicales; Brassicaceae; Camelineae; Arabidopsis	0.536511	0.917037	0.151155	0.337286	1.15916	1.63561	2.82637	2.18231	0.998235	1.24494	0.672896	0.289503	1.06426	0.52514	-4.23694	-5.94181	-4.36167
1	Nsylvestris_NODE_11473_length_1933_cov_146	S23IP_HUMAN^S23IP_HUMAN^Q:747-878,H:653-696^54.545%ID^E:1.79e-06^RecName: Full=SEC23-interacting protein;^Eukaryota; Metazoa; Chordata; Craniata; Vertebrata; Euteleostomi; Mammalia; Eutheria; Euarchontoglires; Primates; Haplorrhini; Catarrhini; Hominidae; Homo	0.415056	0.343732	-0.300853	-0.533353	0.496805	1.86823	2.27878	1.56614	0.657505	0.753366	0.190425	0.642909	1.19191	0.49067	-3.50549	-2.94497	-3.61086
1	Nsylvestris_NODE_11474_length_1927_cov_116	FDL1_ARATH^FDL1_ARATH^Q:307-1530,H:5-413^31.655%ID^E:5.25e-53^RecName: Full=F-box/FBD/LRR-repeat protein At1g13570;^Eukaryota; Viridiplantae; Streptophyta; Embryophyta; Tracheophyta; Spermatophyta; Magnoliopsida; eudicotyledons; Gunneridae; Pentapetalae; rosids; malvids; Brassicales; Brassicaceae; Camelineae; Arabidopsis	0.47835	1.03312	0.0112242	-0.683921	-0.268884	0.0936864	0.923761	-0.321351	-0.205381	0.615296	0.270718	0.102874	0.529611	-0.232255	-0.81772	-0.485876	-1.04326
1	Nsylvestris_NODE_11476_length_1933_cov_35	.	0.89851	0.161544	0.277021	0.277021	0.383937	1.93413	2.11667	0.89851	-0.10149	0.483472	0.968899	0.483472	0.824509	0.664045	-3.42342	-3.42342	-3.42342
1	Nsylvestris_NODE_1148_length_4759_cov_141	TOL9_ARATH^TOL9_ARATH^Q:2571-3638,H:35-380^71.389%ID^E:4.76e-142^RecName: Full=TOM1-like protein 9 {ECO:0000305};^Eukaryota; Viridiplantae; Streptophyta; Embryophyta; Tracheophyta; Spermatophyta; Magnoliopsida; eudicotyledons; Gunneridae; Pentapetalae; rosids; malvids; Brassicales; Brassicaceae; Camelineae; Arabidopsis`TOL9_ARATH^TOL9_ARATH^Q:4236-4487,H:590-675^55.814%ID^E:7.43e-15^RecName: Full…	0.848018	0.813613	0.487643	0.0514433	0.599227	0.967314	2.10604	1.24061	0.890713	0.942768	0.699466	0.778233	1.21733	0.392532	-4.13732	-4.31204	-3.58559
1	Nsylvestris_NODE_11480_length_1932_cov_183	ARID2_ARATH^ARID2_ARATH^Q:1046-498,H:368-539^37.097%ID^E:1.4e-31^RecName: Full=AT-rich interactive domain-containing protein 2;^Eukaryota; Viridiplantae; Streptophyta; Embryophyta; Tracheophyta; Spermatophyta; Magnoliopsida; eudicotyledons; Gunneridae; Pentapetalae; rosids; malvids; Brassicales; Brassicaceae; Camelineae; Arabidopsis	0.74684	0.745173	0.790502	-0.00133447	0.274519	0.60842	1.80442	1.64849	1.071	0.933682	0.837114	1.17461	1.19308	0.292898	-4.09919	-3.33846	-4.68176
1	Nsylvestris_NODE_11481_length_1932_cov_173	MET16_DANRE^MET16_DANRE^Q:206-1072,H:45-284^34.884%ID^E:2.81e-43^RecName: Full=RNA N6-adenosine-methyltransferase mettl16 {ECO:0000305};^Eukaryota; Metazoa; Chordata; Craniata; Vertebrata; Euteleostomi; Actinopterygii; Neopterygii; Teleostei; Ostariophysi; Cypriniformes; Cyprinidae; Danio	0.924317	1.42806	0.508287	0.122467	0.563072	1.78286	2.63267	1.42621	1.42683	1.21999	0.88455	1.10974	0.806518	0.393822	-5.44008	-4.34923	-5.44008
1	Nsylvestris_NODE_11483_length_1932_cov_148	RNF5_HUMAN^RNF5_HUMAN^Q:1820-1497,H:5-103^32.11%ID^E:5.93e-07^RecName: Full=E3 ubiquitin-protein ligase RNF5;^Eukaryota; Metazoa; Chordata; Craniata; Vertebrata; Euteleostomi; Mammalia; Eutheria; Euarchontoglires; Primates; Haplorrhini; Catarrhini; Hominidae; Homo	1.24968	1.15801	1.08257	0.700887	0.405102	1.07953	2.05316	1.54558	0.641994	0.85523	1.13232	1.05703	0.922101	0.367787	-4.75032	-4.75032	-4.75032
1	Nsylvestris_NODE_11484_length_1932_cov_134	CDC16_ARATH^CDC16_ARATH^Q:45-1625,H:17-541^80.076%ID^E:0^RecName: Full=Anaphase-promoting complex subunit 6;^Eukaryota; Viridiplantae; Streptophyta; Embryophyta; Tracheophyta; Spermatophyta; Magnoliopsida; eudicotyledons; Gunneridae; Pentapetalae; rosids; malvids; Brassicales; Brassicaceae; Camelineae; Arabidopsis	1.31269	1.68935	1.52098	0.430704	1.45388	1.90671	2.20975	1.95442	0.0612756	0.461905	-0.701319	0.5698	-0.288844	-0.994101	-4.19574	-4.19574	-3.19574
1	Nsylvestris_NODE_11486_length_1932_cov_78	.	0.591222	0.528946	0.248879	-0.160879	0.901896	1.71176	2.27232	0.863434	0.481877	0.944055	-0.396854	0.530366	1.11977	0.293043	-3.88023	-3.93561	-2.11399
1	Nsylvestris_NODE_11487_length_1932_cov_58	Y4844_ARATH^Y4844_ARATH^Q:1405-1584,H:90-149^71.667%ID^E:4.43e-22^RecName: Full=Uncharacterized protein At4g28440;^Eukaryota; Viridiplantae; Streptophyta; Embryophyta; Tracheophyta; Spermatophyta; Magnoliopsida; eudicotyledons; Gunneridae; Pentapetalae; rosids; malvids; Brassicales; Brassicaceae; Camelineae; Arabidopsis	0.442168	0.489743	1.08368	-0.273175	0.104391	1.44102	2.77637	1.83647	0.611229	0.956022	1.0593	1.01644	0.858645	0.439286	-3.84871	-5.20486	-3.78802
1	Nsylvestris_NODE_11489_length_1932_cov_50	GGPPS_HEVBR^GGPPS_HEVBR^Q:1325-363,H:48-369^63.043%ID^E:6.69e-137^RecName: Full=Geranylgeranyl pyrophosphate synthase, chloroplastic;^Eukaryota; Viridiplantae; Streptophyta; Embryophyta; Tracheophyta; Spermatophyta; Magnoliopsida; eudicotyledons; Gunneridae; Pentapetalae; rosids; fabids; Malpighiales; Euphorbiaceae; Crotonoideae; Micrandreae; Hevea	0.765267	0.943523	1.24412	0.510081	0.765267	-0.372236	1.47576	1.44879	1.14781	-0.191664	1.07843	0.627283	1.76286	0.632086	-4.27913	-4.27913	-3.27913
1	Nsylvestris_NODE_1149_length_4759_cov_61	MCA1_ARATH^MCA1_ARATH^Q:3910-3440,H:74-233^53.75%ID^E:1.58e-50^RecName: Full=Metacaspase-1;^Eukaryota; Viridiplantae; Streptophyta; Embryophyta; Tracheophyta; Spermatophyta; Magnoliopsida; eudicotyledons; Gunneridae; Pentapetalae; rosids; malvids; Brassicales; Brassicaceae; Camelineae; Arabidopsis`MCA1_ARATH^MCA1_ARATH^Q:2683-2372,H:206-315^52.252%ID^E:3.66e-20^RecName: Full=Metacaspase-1;^Eukary…	1.26962	1.7992	1.82629	0.926126	1.46139	2.26311	2.50449	1.80783	-0.505558	-1.05469	-0.22956	-0.69462	0.485929	-1.14237	-2.86853	-4.2158	-3.63287
1	Nsylvestris_NODE_11491_length_1931_cov_225	.	0.598652	0.5309	0.063089	-0.533869	-0.0961142	1.45434	2.17362	0.671699	0.955752	0.880424	0.617222	0.802169	0.933178	0.815785	-3.38697	-3.28473	-3.19514
1	Nsylvestris_NODE_11492_length_1931_cov_187	SAPK2_ORYSI^SAPK2_ORYSI^Q:243-1274,H:1-339^76.744%ID^E:0^RecName: Full=Serine/threonine-protein kinase SAPK2;^Eukaryota; Viridiplantae; Streptophyta; Embryophyta; Tracheophyta; Spermatophyta; Magnoliopsida; Liliopsida; Poales; Poaceae; BOP clade; Oryzoideae; Oryzeae; Oryzinae; Oryza; Oryza sativa	0.826004	0.116856	0.688876	-0.3036	-0.334996	0.798168	1.93339	1.08807	1.68531	0.745128	0.847629	0.878992	1.5084	0.693235	-3.75926	-3.8645	-3.54771
1	Nsylvestris_NODE_11498_length_1931_cov_18	RNHX1_ARATH^RNHX1_ARATH^Q:161-346,H:13-74^38.71%ID^E:1.24e-17^RecName: Full=Putative ribonuclease H protein At1g65750;^Eukaryota; Viridiplantae; Streptophyta; Embryophyta; Tracheophyta; Spermatophyta; Magnoliopsida; eudicotyledons; Gunneridae; Pentapetalae; rosids; malvids; Brassicales; Brassicaceae; Camelineae; Arabidopsis`RNHX1_ARATH^RNHX1_ARATH^Q:418-669,H:99-191^28.723%ID^E:1.24e-17^RecName: …	0.0979187	0.419847	-0.902081	1.09792	1.41985	1.90527	1.68288	2.00481	0.682881	0.905274	0.0979187	-1.90208	0.0979187	-1.90208	-1.90208	-1.90208	-1.90208
1	Nsylvestris_NODE_11502_length_1930_cov_199	DJC27_ORYSJ^DJC27_ORYSJ^Q:1823-108,H:5-582^53.621%ID^E:0^RecName: Full=DnaJ protein ERDJ3A {ECO:0000305};^Eukaryota; Viridiplantae; Streptophyta; Embryophyta; Tracheophyta; Spermatophyta; Magnoliopsida; Liliopsida; Poales; Poaceae; BOP clade; Oryzoideae; Oryzeae; Oryzinae; Oryza; Oryza sativa	1.91229	1.06768	0.931574	0.349357	0.7113	1.26214	2.91753	1.8506	0.698807	1.5749	1.73164	-1.44606	1.70929	1.49927	-5.59011	-5.59011	-5.59011
1	Nsylvestris_NODE_11504_length_1930_cov_85	.	0.0388627	0.684367	0.931947	-0.266841	0.231508	1.7338	2.40143	1.0041	0.687438	0.930097	0.854828	1.10565	0.968113	0.170107	-2.76849	-4.35345	-4.35345
1	Nsylvestris_NODE_11505_length_1930_cov_55	.	0.642787	0.367152	0.92658	0.367152	-0.0734203	1.16362	2.26897	1.24851	1.24851	1.11922	0.92658	1.24851	0.0743516	0.113805	-3.88078	-3.88078	-3.88078
1	Nsylvestris_NODE_11506_length_1930_cov_16	.	0.812242	1.24549	1.55698	-0.00489416	1.60234	-0.00489416	1.71131	1.43568	1.53896	0.732071	0.602338	0.12635	1.71131	0.12635	-4.39721	-4.39721	-4.39721
1	Nsylvestris_NODE_11512_length_1929_cov_111	C7A12_PANGI^C7A12_PANGI^Q:279-1637,H:45-500^57.952%ID^E:0^RecName: Full=Cytochrome P450 CYP736A12;^Eukaryota; Viridiplantae; Streptophyta; Embryophyta; Tracheophyta; Spermatophyta; Magnoliopsida; eudicotyledons; Gunneridae; Pentapetalae; asterids; campanulids; Apiales; Araliaceae; Panax	0.53833	-0.0886648	-0.50349	-1.13152	-0.447995	2.50708	3.19694	2.82831	1.6913	1.49354	1.9318	0.861577	1.951	1.79266	-4.85399	-6.17592	-5.59095
1	Nsylvestris_NODE_11517_length_1928_cov_194	ZDH19_ARATH^ZDH19_ARATH^Q:343-1602,H:1-404^65.412%ID^E:5.65e-171^RecName: Full=Protein S-acyltransferase 8;^Eukaryota; Viridiplantae; Streptophyta; Embryophyta; Tracheophyta; Spermatophyta; Magnoliopsida; eudicotyledons; Gunneridae; Pentapetalae; rosids; malvids; Brassicales; Brassicaceae; Camelineae; Arabidopsis	0.930173	0.953492	0.342469	0.331484	0.825944	1.37411	2.19996	1.25066	0.880149	0.496055	0.307767	0.81532	1.41948	0.504742	-3.62813	-4.00713	-4.99655
1	Nsylvestris_NODE_11518_length_1928_cov_133	ALG10_ARATH^ALG10_ARATH^Q:1131-382,H:259-509^60.236%ID^E:5.07e-89^RecName: Full=Dol-P-Glc:Glc(2)Man(9)GlcNAc(2)-PP-Dol alpha-1,2-glucosyltransferase {ECO:0000305};^Eukaryota; Viridiplantae; Streptophyta; Embryophyta; Tracheophyta; Spermatophyta; Magnoliopsida; eudicotyledons; Gunneridae; Pentapetalae; rosids; malvids; Brassicales; Brassicaceae; Camelineae; Arabidopsis	0.865664	0.780876	0.301414	0.222959	-0.0656194	1.1919	1.8217	0.347465	0.987582	1.25613	0.679371	1.00598	1.01609	0.597172	-4.01517	-2.9876	-4.00592
1	Nsylvestris_NODE_11521_length_1928_cov_58	CCLOP_MEDTR^CCLOP_MEDTR^Q:1824-277,H:6-513^52.652%ID^E:2.94e-124^RecName: Full=Protein CYCLOPS {ECO:0000303|PubMed:19074278};^Eukaryota; Viridiplantae; Streptophyta; Embryophyta; Tracheophyta; Spermatophyta; Magnoliopsida; eudicotyledons; Gunneridae; Pentapetalae; rosids; fabids; Fabales; Fabaceae; Papilionoideae; 50 kb inversion clade; NPAAA clade; Hologalegina; IRL clade; Trifolieae; Medicago	0.648531	1.03186	0.709931	-1.5531	0.372896	0.709931	1.85289	1.87986	0.212432	-0.174592	0.879856	0.879856	0.879856	-0.705106	-3.87503	-1.87503	-1.87503
1	Nsylvestris_NODE_11522_length_1927_cov_147	DTX35_ARATH^DTX35_ARATH^Q:50-1501,H:1-478^68.388%ID^E:0^RecName: Full=Protein DETOXIFICATION 35 {ECO:0000303|PubMed:11739388};^Eukaryota; Viridiplantae; Streptophyta; Embryophyta; Tracheophyta; Spermatophyta; Magnoliopsida; eudicotyledons; Gunneridae; Pentapetalae; rosids; malvids; Brassicales; Brassicaceae; Camelineae; Arabidopsis	0.900372	0.742476	0.919368	0.343476	0.837204	1.43023	2.21374	1.56558	0.95958	1.52031	-0.529654	1.75933	0.948393	-0.108877	-4.50051	-4.50051	-4.50051
1	Nsylvestris_NODE_11523_length_1925_cov_132	FB119_ARATH^FB119_ARATH^Q:1881-913,H:13-336^45.783%ID^E:5.67e-79^RecName: Full=F-box protein At2g27310;^Eukaryota; Viridiplantae; Streptophyta; Embryophyta; Tracheophyta; Spermatophyta; Magnoliopsida; eudicotyledons; Gunneridae; Pentapetalae; rosids; malvids; Brassicales; Brassicaceae; Camelineae; Arabidopsis	1.5528	1.05205	0.541084	0.378489	0.865364	0.549662	1.54374	0.0731696	1.54187	0.659369	1.5077	0.960158	2.24981	0.955367	-5.08157	-4.45985	-4.88922
1	Nsylvestris_NODE_11524_length_1927_cov_120	DTX33_ARATH^DTX33_ARATH^Q:121-1542,H:10-484^51.368%ID^E:4.04e-155^RecName: Full=Protein DETOXIFICATION 33 {ECO:0000303|PubMed:11739388};^Eukaryota; Viridiplantae; Streptophyta; Embryophyta; Tracheophyta; Spermatophyta; Magnoliopsida; eudicotyledons; Gunneridae; Pentapetalae; rosids; malvids; Brassicales; Brassicaceae; Camelineae; Arabidopsis	-1.9282	0.0736031	2.74026	1.65074	1.79427	-0.928199	2.97869	2.95444	-1.25917	-0.120844	-2.9282	-0.343237	1.54753	-0.122907	-2.9282	-1.34324	-1.83735
1	Nsylvestris_NODE_11525_length_1927_cov_116	RUS3_ARATH^RUS3_ARATH^Q:1811-492,H:2-440^68.254%ID^E:0^RecName: Full=Protein root UVB sensitive 3 {ECO:0000303|PubMed:19515790};^Eukaryota; Viridiplantae; Streptophyta; Embryophyta; Tracheophyta; Spermatophyta; Magnoliopsida; eudicotyledons; Gunneridae; Pentapetalae; rosids; malvids; Brassicales; Brassicaceae; Camelineae; Arabidopsis	0.667162	1.26209	1.54659	0.341737	0.824293	1.50352	1.92361	1.44024	-0.2713	-0.0599749	0.412568	-0.176813	0.448395	0.0264873	-2.0257	-4.46665	-3.39626
1	Nsylvestris_NODE_11526_length_1927_cov_104	PERK2_ARATH^PERK2_ARATH^Q:1205-273,H:342-648^40.566%ID^E:1.48e-63^RecName: Full=Proline-rich receptor-like protein kinase PERK2;^Eukaryota; Viridiplantae; Streptophyta; Embryophyta; Tracheophyta; Spermatophyta; Magnoliopsida; eudicotyledons; Gunneridae; Pentapetalae; rosids; malvids; Brassicales; Brassicaceae; Camelineae; Arabidopsis	0.648084	0.617381	0.972596	-0.0043618	-0.193528	2.06239	1.41575	1.25486	1.40316	0.0519286	-0.198168	1.08119	0.826887	-0.140088	-2.62429	-4.83218	-2.34161
1	Nsylvestris_NODE_11527_length_1927_cov_97	CRK42_ARATH^CRK42_ARATH^Q:355-1872,H:19-518^54.902%ID^E:0^RecName: Full=Cysteine-rich receptor-like protein kinase 42;^Eukaryota; Viridiplantae; Streptophyta; Embryophyta; Tracheophyta; Spermatophyta; Magnoliopsida; eudicotyledons; Gunneridae; Pentapetalae; rosids; malvids; Brassicales; Brassicaceae; Camelineae; Arabidopsis	1.76395	1.13072	1.12685	1.06954	0.831155	0.756042	1.59093	1.00472	1.20926	0.0535479	0.667657	0.592643	1.94444	1.07758	-4.93967	-4.93967	-4.93967
1	Nsylvestris_NODE_11528_length_1927_cov_71	.	1.13862	0.617156	-0.417778	0.00111181	0.342149	0.738077	1.95245	0.342149	0.486539	0.952202	1.09422	0.678582	0.849643	0.679184	-3.90578	-2.90578	-2.64274
1	Nsylvestris_NODE_11529_length_1927_cov_29	.	0.817073	0.3078	0.3078	-0.6922	0.3078	0.3078	1.67703	-0.107238	1.42328	-0.277163	1.36669	1.18227	1.58082	0.629728	-2.27716	-3.27716	-3.27716
1	Nsylvestris_NODE_1153_length_4751_cov_132	ZDHC9_ARATH^ZDHC9_ARATH^Q:4209-2929,H:1-425^66.977%ID^E:0^RecName: Full=Probable protein S-acyltransferase 7;^Eukaryota; Viridiplantae; Streptophyta; Embryophyta; Tracheophyta; Spermatophyta; Magnoliopsida; eudicotyledons; Gunneridae; Pentapetalae; rosids; malvids; Brassicales; Brassicaceae; Camelineae; Arabidopsis	1.33098	1.45763	0.457754	0.138617	1.10381	1.98055	2.58706	1.58031	0.642869	0.569768	-0.125495	0.912258	0.749337	0.278366	-3.50191	-6.36981	-3.79208
1	Nsylvestris_NODE_11531_length_1927_cov_9	.	1.30118	1.73002	-1.39926	-2.39926	-1.39926	2.92267	3.67756	2.84867	0.921225	2.29227	2.77046	-2.39926	-0.591905	-1.07733	-2.39926	-3.39926	-3.39926
1	Nsylvestris_NODE_11533_length_1926_cov_191	CTU2_ARATH^CTU2_ARATH^Q:140-1426,H:37-456^57.11%ID^E:3.02e-156^RecName: Full=Cytoplasmic tRNA 2-thiolation protein 2 {ECO:0000255|HAMAP-Rule:MF_03054};^Eukaryota; Viridiplantae; Streptophyta; Embryophyta; Tracheophyta; Spermatophyta; Magnoliopsida; eudicotyledons; Gunneridae; Pentapetalae; rosids; malvids; Brassicales; Brassicaceae; Camelineae; Arabidopsis	0.455294	1.15795	0.797127	-0.116972	-0.0193391	0.289989	1.68592	1.46833	0.926985	0.801217	0.968694	0.647714	0.501712	-0.0828138	-3.094	-2.6929	-3.6949
1	Nsylvestris_NODE_11534_length_1926_cov_141	AATPG_ARATH^AATPG_ARATH^Q:283-1245,H:1-314^46.894%ID^E:5.47e-93^RecName: Full=AAA-ATPase At5g17740;^Eukaryota; Viridiplantae; Streptophyta; Embryophyta; Tracheophyta; Spermatophyta; Magnoliopsida; eudicotyledons; Gunneridae; Pentapetalae; rosids; malvids; Brassicales; Brassicaceae; Camelineae; Arabidopsis	0.542642	1.63455	1.42993	1.15722	0.424955	1.82221	3.00943	2.78132	0.32789	0.96119	0.264387	-1.33906	0.12544	-0.556971	-4.19504	-4.19504	-4.19504
1	Nsylvestris_NODE_11535_length_1926_cov_123	.	0.265984	0.624949	0.482676	0.484288	1.05617	-0.468952	1.69892	1.86527	0.505081	0.497252	-0.0914407	0.307702	1.24403	0.262779	-3.63576	-1.9739	-3.12505
1	Nsylvestris_NODE_11539_length_1926_cov_10	.	-0.765285	-0.350248	-2.35025	-0.350248	-2.35025	0.819677	1.64975	0.234715	0.234715	3.26446	0.649752	2.55664	1.35019	1.45711	-1.35025	-2.35025	-2.35025
1	Nsylvestris_NODE_1154_length_4749_cov_223	CP511_ARATH^CP511_ARATH^Q:2953-4350,H:1-469^80.384%ID^E:0^RecName: Full=Sterol 14-demethylase;^Eukaryota; Viridiplantae; Streptophyta; Embryophyta; Tracheophyta; Spermatophyta; Magnoliopsida; eudicotyledons; Gunneridae; Pentapetalae; rosids; malvids; Brassicales; Brassicaceae; Camelineae; Arabidopsis	0.491734	0.90525	0.40363	0.0972908	0.97209	1.58484	2.28717	1.57842	0.999942	0.743901	0.084128	0.481654	1.19363	0.340296	-3.96264	-4.41872	-3.78261
1	Nsylvestris_NODE_11540_length_1925_cov_177	ROC1_NICSY^ROC1_NICSY^Q:265-903,H:54-266^100%ID^E:1.12e-119^RecName: Full=29 kDa ribonucleoprotein A, chloroplastic;^Eukaryota; Viridiplantae; Streptophyta; Embryophyta; Tracheophyta; Spermatophyta; Magnoliopsida; eudicotyledons; Gunneridae; Pentapetalae; asterids; lamiids; Solanales; Solanaceae; Nicotianoideae; Nicotianeae; Nicotiana	0.968246	0.540009	-1.52552	-0.662625	0.192856	1.63336	1.70396	0.816121	0.755001	0.694732	0.467119	-0.0304048	0.711895	0.0980321	-2.58838	-1.17524	-2.59915
1	Nsylvestris_NODE_11541_length_1925_cov_88	CYC13_CATRO^CYC13_CATRO^Q:1211-225,H:180-500^60.182%ID^E:8.95e-130^RecName: Full=Cytochrome P450 81C13 {ECO:0000303|PubMed:24710322};^Eukaryota; Viridiplantae; Streptophyta; Embryophyta; Tracheophyta; Spermatophyta; Magnoliopsida; eudicotyledons; Gunneridae; Pentapetalae; asterids; lamiids; Gentianales; Apocynaceae; Rauvolfioideae; Vinceae; Catharanthinae; Catharanthus`CYC13_CATRO^CYC13_CATRO^Q:1…	0.147481	-0.388572	-1.38857	-1.06664	-0.585345	2.19639	2.36632	2.65582	0.782955	0.322923	1.89757	-1.38857	1.19519	0.418783	-2.38857	-2.38857	-2.38857
1	Nsylvestris_NODE_11542_length_1925_cov_70	Y3720_ARATH^Y3720_ARATH^Q:1483-224,H:45-436^26.682%ID^E:1.22e-30^RecName: Full=UPF0481 protein At3g47200;^Eukaryota; Viridiplantae; Streptophyta; Embryophyta; Tracheophyta; Spermatophyta; Magnoliopsida; eudicotyledons; Gunneridae; Pentapetalae; rosids; malvids; Brassicales; Brassicaceae; Camelineae; Arabidopsis	-0.319267	0.610295	0.568975	0.222836	-0.603871	1.38893	1.9739	1.12554	1.2416	1.17414	0.542198	2.44465	1.7577	0.460467	-4.19603	-4.19603	-4.19603
[truncated: 45,690 more rows]
